# Supplementary material for: NAPT, an unbiased approach for sequential analysis of the protein N- and C-terminome
Source: Royal Society of Chemistry journal article supplement (doi:10.1039/d2cc03778e), 2022-01-01
Supplement: d2cc03778e2.xlsx [file d2cc03778e2.xlsx]

## Sheet: Table S2a
Table S2. List of identified terminal peptides from Hela cell using LysargiNase as protease .
Table S2a. List of identified N-terminal peptides.
Number	Peptide	secaaBefore	aaBefore	pepSeq	aaAfter	PTM	Accession	Mass	Length
1	A(+27.99)KVAKDLNPGV	-	M	AKVAKDLNPGV	K	Formylation (Protein N-term)	Q9NZU5	1138.63	11
2	A(+27.99)LALAALAAVE(+43.04)PAC(+57.02)GS	-	M	ALALAALAAVEPACGS	R	Formylation (Protein N-term); ethanolamine (DE); Carbamidomethylation	Q9BT67	1554.81	16
3	A(+42.01)AAAAAAAAAGAAGG	-	M	AAAAAAAAAAGAAGG	R	Acetylation (Protein N-term)	Q86U42	1083.53	15
4	A(+42.01)AAAAAAGD(+43.04)SDSWD(+43.04)AD(+43.04)AFSVE(+43.04)D(+43.04)PVR	-	M	AAAAAAAGDSDSWDADAFSVEDPVR	K	Acetylation (Protein N-term); ethanolamine (DE); ethanolamine (DE); ethanolamine (DE); ethanolamine (DE); more	O75822	2721.3	25
5	A(+42.01)AAAAAAVGGQQPSQPE(+43.04)LPAPGLALD(+43.04)	-	M	AAAAAAAVGGQQPSQPELPAPGLALD	K	Acetylation (Protein N-term); ethanolamine (DE); ethanolamine (DE)	Q6ZT12	2498.31	26
6	A(+42.01)AAAAAGAAS	-	M	AAAAAAGAAS	G	Acetylation (Protein N-term)	Q96P70	772.371	10
7	A(+42.01)AAAAAGAASGLPGPVAQ	-	M	AAAAAAGAASGLPGPVAQ	G	Acetylation (Protein N-term)	Q96P70	1491.77	18
8	A(+42.01)AAAAAGAASGLPGPVAQGL	-	M	AAAAAAGAASGLPGPVAQGL	K	Acetylation (Protein N-term)	Q96P70	1661.87	20
9	A(+42.01)AAAAAGAGPE(+43.04)M(+15.99)V	-	M	AAAAAAGAGPEMV	R	Acetylation (Protein N-term); ethanolamine (DE); Oxidation (M)	P28482	1186.57	13
10	A(+42.01)AAAAAGAGPE(+43.04)MV	-	M	AAAAAAGAGPEMV	R	Acetylation (Protein N-term); ethanolamine (DE)	P28482	1170.57	13
11	A(+42.01)AAAAAGAGPEM(+15.99)V	-	M	AAAAAAGAGPEMV	R	Acetylation (Protein N-term); Oxidation (M)	P28482	1143.52	13
12	A(+42.01)AAAAAGAGPEMV	-	M	AAAAAAGAGPEMV	R	Acetylation (Protein N-term)	P28482	1127.53	13
13	A(+42.01)AAAAAGE(+43.04)A	-，A	M，A	AAAAAAGEA	R，I	Acetylation (Protein N-term); ethanolamine (DE)	P09417，P13378	786.387	9
14	A(+42.01)AAAAAGE(+43.04)AR	-	M	AAAAAAGEAR	R	Acetylation (Protein N-term); ethanolamine (DE)	P09417	942.488	10
15	A(+42.01)AAAAAGPSPGSGPGD(+43.04)	-	M	AAAAAAGPSPGSGPGD	S	Acetylation (Protein N-term); ethanolamine (DE)	Q9UID3	1337.62	16
16	A(+42.01)AAAAAGPSPGSGPGD(+43.04)SPE(+43.04)GPE(+43.04)GE(+43.04)APE(+43.04)	-	M	AAAAAAGPSPGSGPGDSPEGPEGEAPE	R	Acetylation (Protein N-term); ethanolamine (DE); ethanolamine (DE); ethanolamine (DE); ethanolamine (DE); more	Q9UID3	2589.23	27
17	A(+42.01)AAAAAGPSPGSGPGD(+43.04)SPE(+43.04)GPE(+43.04)GE(+43.04)APE(+43.04)R	-	M	AAAAAAGPSPGSGPGDSPEGPEGEAPER	R	Acetylation (Protein N-term); ethanolamine (DE); ethanolamine (DE); ethanolamine (DE); ethanolamine (DE); more	Q9UID3	2745.33	28
18	A(+42.01)AAAAAGSGTP	-	M	AAAAAAGSGTP	R	Acetylation (Protein N-term)	Q9NR33	885.419	11
19	A(+42.01)AAAAAGSGTPR	-	M	AAAAAAGSGTPR	E	Acetylation (Protein N-term)	Q9NR33	1041.52	12
20	A(+42.01)AAAAAVGPGAG	-	M	AAAAAAVGPGAG	G	Acetylation (Protein N-term)	Q86X55	924.466	12
21	A(+42.01)AAAAAVGPGAGGAG	-	M	AAAAAAVGPGAGGAG	S	Acetylation (Protein N-term)	Q86X55	1109.55	15
22	A(+42.01)AAAAAVGPGAGGAGS	-	M	AAAAAAVGPGAGGAGS	A	Acetylation (Protein N-term)	Q86X55	1196.58	16
23	A(+42.01)AAAAE(+43.04)E(+43.04)GM(+15.99)E(+43.04)P	-	M	AAAAAEEGMEP	R	Acetylation (Protein N-term); ethanolamine (DE); ethanolamine (DE); Oxidation (M); ethanolamine (DE)	P51788	1232.57	11
24	A(+42.01)AAAAE(+43.04)E(+43.04)GME(+43.04)P	-	M	AAAAAEEGMEP	R	Acetylation (Protein N-term); ethanolamine (DE); ethanolamine (DE); ethanolamine (DE)	P51788	1216.58	11
25	A(+42.01)AAAAE(+43.04)QQQFY	-	M	AAAAAEQQQFY	L	Acetylation (Protein N-term); ethanolamine (DE)	O00410	1281.6	11
26	A(+42.01)AAAAE(+43.04)QQQFYL	-	M	AAAAAEQQQFYL	L	Acetylation (Protein N-term); ethanolamine (DE)	O00410	1394.68	12
27	A(+42.01)AAAAE(+43.04)QQQFYLLLGN	-	M	AAAAAEQQQFYLLLGN	L	Acetylation (Protein N-term); ethanolamine (DE)	O00410	1791.92	16
28	A(+42.01)AAAAE(+43.04)TPE(+43.04)VL	-	M	AAAAAETPEVL	R	Acetylation (Protein N-term); ethanolamine (DE); ethanolamine (DE)	Q9NXW9	1169.63	11
29	A(+42.01)AAAAGAGSGPWAAQE(+43.04)	-，-	M，M	AAAAAGAGSGPWAAQE	K，K	Acetylation (Protein N-term); ethanolamine (DE)	P86791，P86790	1469.69	16
30	A(+42.01)AAAAGLGGGGAGPGPE(+43.04)AGD(+43.04)	-	M	AAAAAGLGGGGAGPGPEAGD	F	Acetylation (Protein N-term); ethanolamine (DE); ethanolamine (DE)	P23610	1650.8	20
31	A(+42.01)AAAAGTATSQ	-	M	AAAAAGTATSQ	R	Acetylation (Protein N-term)	Q9Y2Z0	960.451	11
32	A(+42.01)AAAAM(+15.99)AE(+43.04)QE(+43.04)SA	-	M	AAAAAMAEQESA	R	Acetylation (Protein N-term); Oxidation (M); ethanolamine (DE); ethanolamine (DE)	Q7L5D6	1263.58	12
33	A(+42.01)AAAAMAE(+43.04)QE(+43.04)SA	-	M	AAAAAMAEQESA	R	Acetylation (Protein N-term); ethanolamine (DE); ethanolamine (DE)	Q7L5D6	1247.58	12
34	A(+42.01)AAAAMAEQE(+43.04)SA(+43.04)	-	M	AAAAAMAEQESA	R	Acetylation (Protein N-term); ethanolamine (DE); ethanolamine (C-term)	Q7L5D6	1247.58	12
35	A(+42.01)AAAAQGGGGGE(+43.04)P	-	M	AAAAAQGGGGGEP	R	Acetylation (Protein N-term); ethanolamine (DE)	P27361	1097.51	13
36	A(+42.01)AAAAQGGGGGE(+43.04)PR	-	M	AAAAAQGGGGGEPR	R	Acetylation (Protein N-term); ethanolamine (DE)	P27361	1253.61	14
37	A(+42.01)AAAAQGGGGGEPR(+43.04)	-	M	AAAAAQGGGGGEPR	R	Acetylation (Protein N-term); ethanolamine (C-term)	P27361	1253.61	14
38	A(+42.01)AAAASAPQQLSD(+43.04)	-	M	AAAAASAPQQLSD	E	Acetylation (Protein N-term); ethanolamine (DE)	Q9Y2U8	1284.63	13
39	A(+42.01)AAAASAPQQLSD(+43.04)E(+43.04)E(+43.04)LFSQL	-	M	AAAAASAPQQLSDEELFSQL	R	Acetylation (Protein N-term); ethanolamine (DE); ethanolamine (DE); ethanolamine (DE)	Q9Y2U8	2217.13	20
40	A(+42.01)AAAASASQD(+43.04)E(+43.04)LNQLE(+43.04)	-	M	AAAAASASQDELNQLE	R	Acetylation (Protein N-term); ethanolamine (DE); ethanolamine (DE); ethanolamine (DE)	Q5VYK3	1758.87	16
41	A(+42.01)AAAASASQDE(+43.04)LNQLE(+43.04)	-	M	AAAAASASQDELNQLE	R	Acetylation (Protein N-term); ethanolamine (DE); ethanolamine (DE)	Q5VYK3	1715.83	16
42	A(+42.01)AAAASGAGGAAGAGTGGAGPAG	-	M	AAAAASGAGGAAGAGTGGAGPAG	R	Acetylation (Protein N-term)	Q9Y2K2	1639.76	23
43	A(+42.01)AAAASHLNLD(+43.04)AL	-	M	AAAAASHLNLDAL	R	Acetylation (Protein N-term); ethanolamine (DE)	Q13049	1321.7	13
44	A(+42.01)AAAAVGNAVPC(+57.02)GA	-	M	AAAAAVGNAVPCGA	R	Acetylation (Protein N-term); Carbamidomethylation	Q9HD20	1240.59	14
45	A(+42.01)AAAD(+43.04)SFSGGPAGV	-	M	AAAADSFSGGPAGV	R	Acetylation (Protein N-term); ethanolamine (DE)	Q96E14	1261.59	14
46	A(+42.01)AAAE(+43.04)C(+57.02)D(+43.04)VVM(+15.99)	-	M	AAAAECDVVM	A	Acetylation (Protein N-term); ethanolamine (DE); Carbamidomethylation; ethanolamine (DE); Oxidation (M)	Q99615	1179.53	10
47	A(+42.01)AAAGAAAAAAAE(+43.04)GE(+43.04)APAE(+43.04)M(+15.99)GALLLE(+43.04)	-	M	AAAAGAAAAAAAEGEAPAEMGALLLE	K	Acetylation (Protein N-term); ethanolamine (DE); ethanolamine (DE); ethanolamine (DE); Oxidation (M); more	Q96KQ7	2497.28	26
48	A(+42.01)AAAGAAAAAAAE(+43.04)GE(+43.04)APAE(+43.04)MGALLLE(+43.04)	-	M	AAAAGAAAAAAAEGEAPAEMGALLLE	K	Acetylation (Protein N-term); ethanolamine (DE); ethanolamine (DE); ethanolamine (DE); ethanolamine (DE)	Q96KQ7	2481.29	26
49	A(+42.01)AAAGD(+43.04)AD(+43.04)D(+43.04)E(+43.04)P	-	M	AAAAGDADDEP	R	Acetylation (Protein N-term); ethanolamine (DE); ethanolamine (DE); ethanolamine (DE); ethanolamine (DE)	Q6NXT1	1215.57	11
50	A(+42.01)AAAGD(+43.04)AD(+43.04)D(+43.04)E(+43.04)PR	-	M	AAAAGDADDEPR	S	Acetylation (Protein N-term); ethanolamine (DE); ethanolamine (DE); ethanolamine (DE); ethanolamine (DE)	Q6NXT1	1371.67	12
51	A(+42.01)AAAGD(+43.04)ADD(+43.04)E(+43.04)PR	-	M	AAAAGDADDEPR	S	Acetylation (Protein N-term); ethanolamine (DE); ethanolamine (DE); ethanolamine (DE)	Q6NXT1	1328.63	12
52	A(+42.01)AAAGD(+43.04)GGGE(+43.04)GGAGLGSAAGLGPGPGL	-	M	AAAAGDGGGEGGAGLGSAAGLGPGPGL	R	Acetylation (Protein N-term); ethanolamine (DE); ethanolamine (DE)	Q9HCJ3	2192.08	27
53	A(+42.01)AAAGDAD(+43.04)D(+43.04)E(+43.04)PR	-	M	AAAAGDADDEPR	S	Acetylation (Protein N-term); ethanolamine (DE); ethanolamine (DE); ethanolamine (DE)	Q6NXT1	1328.63	12
54	A(+42.01)AAAGGGGPGTA	-	M	AAAAGGGGPGTA	V	Acetylation (Protein N-term)	Q92922	898.414	12
55	A(+42.01)AAAGGGGPGTAVGATG	-	M	AAAAGGGGPGTAVGATG	S	Acetylation (Protein N-term)	Q92922	1283.61	17
56	A(+42.01)AAAGGGGPGTAVGATGSGI	-	M	AAAAGGGGPGTAVGATGSGI	A	Acetylation (Protein N-term)	Q92922	1540.75	20
57	A(+42.01)AAAGGGGPGTAVGATGSGIA	-	M	AAAAGGGGPGTAVGATGSGIA	A	Acetylation (Protein N-term)	Q92922	1611.79	21
58	A(+42.01)AAAGGGGPGTAVGATGSGIAA	-	M	AAAAGGGGPGTAVGATGSGIAA	A	Acetylation (Protein N-term)	Q92922	1682.82	22
59	A(+42.01)AAAGGGGPGTAVGATGSGIAAAAAGL	-	M	AAAAGGGGPGTAVGATGSGIAAAAAGL	A	Acetylation (Protein N-term)	Q92922	2066.04	27
60	A(+42.01)AAAGGPC(+57.02)V	-	M	AAAAGGPCV	R	Acetylation (Protein N-term); Carbamidomethylation	Q5SRE5	814.364	9
61	A(+42.01)AAALGSSSGSASPAVAE(+43.04)LC(+57.02)QNTPE(+43.04)TFLE(+43.04)AS	-	M	AAAALGSSSGSASPAVAELCQNTPETFLEAS	K	Acetylation (Protein N-term); ethanolamine (DE); Carbamidomethylation; ethanolamine (DE); ethanolamine (DE)	Q96IV0	3164.53	31
62	A(+42.01)AAAM(+15.99)AAAAGGGAGAA	-	M	AAAAMAAAAGGGAGAA	R	Acetylation (Protein N-term); Oxidation (M)	Q9NX46	1216.55	16
63	A(+42.01)AAAMAAAAGGGAGAA	-	M	AAAAMAAAAGGGAGAA	R	Acetylation (Protein N-term)	Q9NX46	1200.56	16
64	A(+42.01)AAANSGSSLPLFD(+43.04)C(+57.02)PTW	-	M	AAAANSGSSLPLFDCPTW	A	Acetylation (Protein N-term); ethanolamine (DE); Carbamidomethylation	Q12972	1948.9	18
65	A(+42.01)AAANSGSSLPLFD(+43.04)C(+57.02)PTWAG	-	M	AAAANSGSSLPLFDCPTWAG	K	Acetylation (Protein N-term); ethanolamine (DE); Carbamidomethylation	Q12972	2076.96	20
66	A(+42.01)AAAPVAAD(+43.04)D(+43.04)D(+43.04)	-	M	AAAAPVAADDD	E	Acetylation (Protein N-term); ethanolamine (DE); ethanolamine (DE); ethanolamine (DE)	Q9H5N1	1156.57	11
67	A(+42.01)AAAPVAAD(+43.04)D(+43.04)D(+43.04)E(+43.04)	-	M	AAAAPVAADDDE	R	Acetylation (Protein N-term); ethanolamine (DE); ethanolamine (DE); ethanolamine (DE); ethanolamine (DE)	Q9H5N1	1328.66	12
68	A(+42.01)AAAPVAAD(+43.04)D(+43.04)DE(+43.04)	-	M	AAAAPVAADDDE	R	Acetylation (Protein N-term); ethanolamine (DE); ethanolamine (DE); ethanolamine (DE)	Q9H5N1	1285.62	12
69	A(+42.01)AAAPVAAD(+43.04)D(+43.04)DE(+43.04)(+43.04)	-	M	AAAAPVAADDDE	R	Acetylation (Protein N-term); ethanolamine (DE); ethanolamine (DE); ethanolamine (C-term); ethanolamine (DE)	Q9H5N1	1328.66	12
70	A(+42.01)AAAPVAADD(+43.04)DE(+43.04)(+43.04)	-	M	AAAAPVAADDDE	R	Acetylation (Protein N-term); ethanolamine (DE); ethanolamine (C-term); ethanolamine (DE)	Q9H5N1	1285.62	12
71	A(+42.01)AAAQLSLTQLSSGNPVYE(+43.04)	-	M	AAAAQLSLTQLSSGNPVYE	K	Acetylation (Protein N-term); ethanolamine (DE)	P42566	2004.02	19
72	A(+42.01)AAATAAE(+43.04)GVPS	-	M	AAAATAAEGVPS	R	Acetylation (Protein N-term); ethanolamine (DE)	Q8TBC3	1099.55	12
73	A(+42.01)AAAVGAGHGAGGPGAASSSGGA	-	M	AAAAVGAGHGAGGPGAASSSGGA	R	Acetylation (Protein N-term)	Q96K37	1749.8	23
74	A(+42.01)AAAVSE(+43.04)SWPE(+43.04)L	-	M	AAAAVSESWPEL	E	Acetylation (Protein N-term); ethanolamine (DE); ethanolamine (DE)	Q8N1G4	1357.69	12
75	A(+42.01)AAAVSE(+43.04)SWPE(+43.04)LE(+43.04)LAE(+43.04)	-	M	AAAAVSESWPELELAE	R	Acetylation (Protein N-term); ethanolamine (DE); ethanolamine (DE); ethanolamine (DE); ethanolamine (DE)	Q8N1G4	1885.98	16
76	A(+42.01)AAAVSE(+43.04)SWPE(+43.04)LELAE(+43.04)	-	M	AAAAVSESWPELELAE	R	Acetylation (Protein N-term); ethanolamine (DE); ethanolamine (DE); ethanolamine (DE)	Q8N1G4	1842.94	16
77	A(+42.01)AAAVSE(+43.04)SWPELE(+43.04)LAE(+43.04)	-	M	AAAAVSESWPELELAE	R	Acetylation (Protein N-term); ethanolamine (DE); ethanolamine (DE); ethanolamine (DE)	Q8N1G4	1842.94	16
78	A(+42.01)AAAVVE(+43.04)FQ	-	M	AAAAVVEFQ	R	Acetylation (Protein N-term); ethanolamine (DE)	O00231	989.518	9
79	A(+42.01)AAAVVVPAE(+43.04)WI	-	M	AAAAVVVPAEWI	K	Acetylation (Protein N-term); ethanolamine (DE)	Q8NI27	1280.71	12
80	A(+42.01)AAAVVVPAE(+43.04)WIK	-	M	AAAAVVVPAEWIK	N	Acetylation (Protein N-term); ethanolamine (DE)	Q8NI27	1408.81	13
81	A(+42.01)AAAYVDHFAAE(+43.04)C(+57.02)LVSM(+15.99)SS	-	M	AAAAYVDHFAAECLVSMSS	R	Acetylation (Protein N-term); ethanolamine (DE); Carbamidomethylation; Oxidation (M)	Q9Y2Y9	2099.93	19
82	A(+42.01)AAD(+43.04)GALPE(+43.04)AAALE(+43.04)QPAE(+43.04)LPASV	-	M	AAADGALPEAAALEQPAELPASV	R	Acetylation (Protein N-term); ethanolamine (DE); ethanolamine (DE); ethanolamine (DE); ethanolamine (DE)	P23025	2375.27	23
83	A(+42.01)AAD(+43.04)GD(+43.04)D(+43.04)SLYPIAVLID(+43.04)	-	M	AAADGDDSLYPIAVLID	E	Acetylation (Protein N-term); ethanolamine (DE); ethanolamine (DE); ethanolamine (DE); ethanolamine (DE)	P30153	1932.02	17
84	A(+42.01)AAD(+43.04)GGGPGGASVGTE(+43.04)E(+43.04)D(+43.04)GGGVGH	-	M	AAADGGGPGGASVGTEEDGGGVGH	R	Acetylation (Protein N-term); ethanolamine (DE); ethanolamine (DE); ethanolamine (DE); ethanolamine (DE)	A6NHR9	2195.02	24
85	A(+42.01)AAD(+43.04)GGGPGGASVGTE(+43.04)E(+43.04)DGGGVGH	-	M	AAADGGGPGGASVGTEEDGGGVGH	R	Acetylation (Protein N-term); ethanolamine (DE); ethanolamine (DE); ethanolamine (DE)	A6NHR9	2151.98	24
86	A(+42.01)AAD(+43.04)GGGPGGASVGTE(+43.04)ED(+43.04)(+43.04)	-	M	AAADGGGPGGASVGTEED	G	Acetylation (Protein N-term); ethanolamine (DE); ethanolamine (DE); ethanolamine (C-term); ethanolamine (DE)	A6NHR9	1730.81	18
87	A(+42.01)AADGGGPGGASVGTE(+43.04)E(+43.04)D(+43.04)GGGVGH	-	M	AAADGGGPGGASVGTEEDGGGVGH	R	Acetylation (Protein N-term); ethanolamine (DE); ethanolamine (DE); ethanolamine (DE)	A6NHR9	2151.98	24
88	A(+42.01)AADGGGPGGASVGTE(+43.04)E(+43.04)DGGGVGH	-	M	AAADGGGPGGASVGTEEDGGGVGH	R	Acetylation (Protein N-term); ethanolamine (DE); ethanolamine (DE)	A6NHR9	2108.94	24
89	A(+42.01)AAE(+43.04)AANC(+57.02)IM(+15.99)	-	M	AAAEAANCIM	E	Acetylation (Protein N-term); ethanolamine (DE); Carbamidomethylation; Oxidation (M)	Q99873	1121.48	10
90	A(+42.01)AAE(+43.04)AGGD(+43.04)D(+43.04)A	-	M	AAAEAGGDDA	R	Acetylation (Protein N-term); ethanolamine (DE); ethanolamine (DE); ethanolamine (DE)	A6NDG6	1017.47	10
91	A(+42.01)AAE(+43.04)AGGD(+43.04)DA(+43.04)	-	M	AAAEAGGDDA	R	Acetylation (Protein N-term); ethanolamine (DE); ethanolamine (DE); ethanolamine (C-term)	A6NDG6	1017.47	10
92	A(+42.01)AAE(+43.04)AGGDD(+43.04)A	-	M	AAAEAGGDDA	R	Acetylation (Protein N-term); ethanolamine (DE); ethanolamine (DE)	A6NDG6	974.431	10
93	A(+42.01)AAE(+43.04)E(+43.04)E(+43.04)D(+43.04)GGPE(+43.04)GPN	-	M	AAAEEEDGGPEGPN	R	Acetylation (Protein N-term); ethanolamine (DE); ethanolamine (DE); ethanolamine (DE); ethanolamine (DE); more	Q99942	1598.75	14
94	A(+42.01)AAE(+43.04)E(+43.04)E(+43.04)D(+43.04)GGPEGPNRE(+43.04)(+43.04)	-	M	AAAEEEDGGPEGPNRE	R	Acetylation (Protein N-term); ethanolamine (DE); ethanolamine (DE); ethanolamine (DE); ethanolamine (DE); more	Q99942	1926.94	16
95	A(+42.01)AAE(+43.04)E(+43.04)E(+43.04)DGGPE(+43.04)GPN	-	M	AAAEEEDGGPEGPN	R	Acetylation (Protein N-term); ethanolamine (DE); ethanolamine (DE); ethanolamine (DE); ethanolamine (DE)	Q99942	1555.71	14
96	A(+42.01)AAE(+43.04)E(+43.04)E(+43.04)DGGPE(+43.04)GPNRE(+43.04)	-	M	AAAEEEDGGPEGPNRE	R	Acetylation (Protein N-term); ethanolamine (DE); ethanolamine (DE); ethanolamine (DE); ethanolamine (DE); more	Q99942	1883.9	16
97	A(+42.01)AAE(+43.04)E(+43.04)E(+43.04)PKP	-	M	AAAEEEPKP	K	Acetylation (Protein N-term); ethanolamine (DE); ethanolamine (DE); ethanolamine (DE)	P55263	1111.59	9
98	A(+42.01)AAE(+43.04)E(+43.04)GC(+57.02)SVGAE(+43.04)AD(+43.04)	-	M	AAAEEGCSVGAEAD	R	Acetylation (Protein N-term); ethanolamine (DE); ethanolamine (DE); Carbamidomethylation; ethanolamine (DE); more	P40855	1549.7	14
99	A(+42.01)AAE(+43.04)PSPR	-	M	AAAEPSPR	R	Acetylation (Protein N-term); ethanolamine (DE)	Q53H96	882.456	8
100	A(+42.01)AAE(+43.04)TQSL	-	M	AAAETQSL	R	Acetylation (Protein N-term); ethanolamine (DE)	Q13523	874.44	8
101	A(+42.01)AAEE(+43.04)GC(+57.02)SVGAE(+43.04)AD(+43.04)	-	M	AAAEEGCSVGAEAD	R	Acetylation (Protein N-term); ethanolamine (DE); Carbamidomethylation; ethanolamine (DE); ethanolamine (DE)	P40855	1506.66	14
102	A(+42.01)AAGAAATHLE(+43.04)VA	-	M	AAAGAAATHLEVA	R	Acetylation (Protein N-term); ethanolamine (DE)	Q96S52	1236.65	13
103	A(+42.01)AAGAGPGQE(+43.04)AGAGPGPGAVANATGAE(+43.04)E(+43.04)GE(+43.04)M	-	M	AAAGAGPGQEAGAGPGPGAVANATGAEEGEM	K	Acetylation (Protein N-term); ethanolamine (DE); ethanolamine (DE); ethanolamine (DE); ethanolamine (DE)	Q9UBL3	2836.34	31
104	A(+42.01)AAGAGPGQE(+43.04)AGAGPGPGAVANATGAE(+43.04)E(+43.04)GE(+43.04)M(+15.99)	-	M	AAAGAGPGQEAGAGPGPGAVANATGAEEGEM	K	Acetylation (Protein N-term); ethanolamine (DE); ethanolamine (DE); ethanolamine (DE); ethanolamine (DE); more	Q9UBL3	2852.34	31
105	A(+42.01)AAGAGPGQE(+43.04)AGAGPGPGAVANATGAE(+43.04)E(+43.04)GEM(+15.99)(+43.04)	-	M	AAAGAGPGQEAGAGPGPGAVANATGAEEGEM	K	Acetylation (Protein N-term); ethanolamine (DE); ethanolamine (DE); ethanolamine (DE); Oxidation (M); more	Q9UBL3	2852.34	31
106	A(+42.01)AAGAPD(+43.04)GME(+43.04)E(+43.04)PGM(+15.99)D(+43.04)	-	M	AAAGAPDGMEEPGMD	T	Acetylation (Protein N-term); ethanolamine (DE); ethanolamine (DE); ethanolamine (DE); Oxidation (M); more	O14562	1647.72	15
107	A(+42.01)AAGGAE(+43.04)GR	-	M	AAAGGAEGR	R	Acetylation (Protein N-term); ethanolamine (DE)	Q86UK7	843.42	9
108	A(+42.01)AAGGGGGGAAAAGR	-	M	AAAGGGGGGAAAAGR	A	Acetylation (Protein N-term)	Q9UL25	1112.53	15
109	A(+42.01)AAITD(+43.04)MAD(+43.04)LE(+43.04)E(+43.04)LS	-	M	AAAITDMADLEELS	R	Acetylation (Protein N-term); ethanolamine (DE); ethanolamine (DE); ethanolamine (DE); ethanolamine (DE)	Q6ZN18	1662.85	14
110	A(+42.01)AALGASGGAGAGD(+43.04)D(+43.04)D(+43.04)FD(+43.04)	-	M	AAALGASGGAGAGDDDFD	Q	Acetylation (Protein N-term); ethanolamine (DE); ethanolamine (DE); ethanolamine (DE); ethanolamine (DE)	Q96EV2	1750.81	18
111	A(+42.01)AALGASGGAGAGD(+43.04)D(+43.04)D(+43.04)FD(+43.04)QFD(+43.04)	-	M	AAALGASGGAGAGDDDFDQFD	K	Acetylation (Protein N-term); ethanolamine (DE); ethanolamine (DE); ethanolamine (DE); ethanolamine (DE); more	Q96EV2	2184.01	21
112	A(+42.01)AAM(+15.99)D(+43.04)VD(+43.04)TPSGTN	-	M	AAAMDVDTPSGTN	S	Acetylation (Protein N-term); Oxidation (M); ethanolamine (DE); ethanolamine (DE)	P62877	1392.62	13
113	A(+42.01)AAM(+15.99)D(+43.04)VD(+43.04)TPSGTNSGAG	-	M	AAAMDVDTPSGTNSGAG	K	Acetylation (Protein N-term); Oxidation (M); ethanolamine (DE); ethanolamine (DE)	P62877	1664.73	17
114	A(+42.01)AAM(+15.99)D(+43.04)VD(+43.04)TPSGTNSGAGK	-	M	AAAMDVDTPSGTNSGAGK	K	Acetylation (Protein N-term); Oxidation (M); ethanolamine (DE); ethanolamine (DE)	P62877	1792.83	18
115	A(+42.01)AAMD(+43.04)VD(+43.04)TPSGTN	-	M	AAAMDVDTPSGTN	S	Acetylation (Protein N-term); ethanolamine (DE); ethanolamine (DE)	P62877	1376.62	13
116	A(+42.01)AAMD(+43.04)VD(+43.04)TPSGTNSGAG	-	M	AAAMDVDTPSGTNSGAG	K	Acetylation (Protein N-term); ethanolamine (DE); ethanolamine (DE)	P62877	1648.74	17
117	A(+42.01)AAMD(+43.04)VD(+43.04)TPSGTNSGAGK	-	M	AAAMDVDTPSGTNSGAGK	K	Acetylation (Protein N-term); ethanolamine (DE); ethanolamine (DE)	P62877	1776.83	18
118	A(+42.01)AAPPSYC(+57.02)FVAFPP	-	M	AAAPPSYCFVAFPP	R	Acetylation (Protein N-term); Carbamidomethylation	Q12765	1535.71	14
119	A(+42.01)AAPPSYC(+57.02)FVAFPPRA	-	M	AAAPPSYCFVAFPPRA	K	Acetylation (Protein N-term); Carbamidomethylation	Q12765	1762.85	16
120	A(+42.01)AAPVAAGSGAG	-	M	AAAPVAAGSGAG	R	Acetylation (Protein N-term)	Q8TEL6	940.461	12
121	A(+42.01)AAPVAAGSGAGRG	-	M	AAAPVAAGSGAGRG	R	Acetylation (Protein N-term)	Q8TEL6	1153.58	14
122	A(+42.01)AAQE(+43.04)AD(+43.04)GA	-	M	AAAQEADGA	R	Acetylation (Protein N-term); ethanolamine (DE); ethanolamine (DE)	O96005	930.441	9
123	A(+42.01)AASGSVLQ	-	M	AAASGSVLQ	R	Acetylation (Protein N-term)	Q5VWZ2	844.429	9
124	A(+42.01)AASGYTD(+43.04)L	-	M	AAASGYTDL	R	Acetylation (Protein N-term); ethanolamine (DE)	Q6P6C2	952.45	9
125	A(+42.01)AASSSD(+43.04)SD(+43.04)AC(+57.02)GAE(+43.04)SNE(+43.04)ANS	-	M	AAASSSDSDACGAESNEANS	K	Acetylation (Protein N-term); ethanolamine (DE); ethanolamine (DE); Carbamidomethylation; ethanolamine (DE); more	Q8NFJ9	2113.88	20
126	A(+42.01)AASVTPPGSLE(+43.04)LLQPGFS	-	M	AAASVTPPGSLELLQPGFS	K	Acetylation (Protein N-term); ethanolamine (DE)	Q12933	1926.01	19
127	A(+42.01)AATAD(+43.04)PGAGNPQPGD(+43.04)	-	M	AAATADPGAGNPQPGD	S	Acetylation (Protein N-term); ethanolamine (DE); ethanolamine (DE)	Q6VN20	1536.72	16
128	A(+42.01)AATAD(+43.04)PGAGNPQPGD(+43.04)SSGGGAGGGLPSPGE(+43.04)QE(+43.04)LS	-	M	AAATADPGAGNPQPGDSSGGGAGGGLPSPGEQELS	R	Acetylation (Protein N-term); ethanolamine (DE); ethanolamine (DE); ethanolamine (DE); ethanolamine (DE)	Q6VN20	3247.53	35
129	A(+42.01)AATAD(+43.04)PGAGNPQPGD(+43.04)SSGGGAGGGLPSPGE(+43.04)QE(+43.04)LSR	-	M	AAATADPGAGNPQPGDSSGGGAGGGLPSPGEQELSR	R	Acetylation (Protein N-term); ethanolamine (DE); ethanolamine (DE); ethanolamine (DE); ethanolamine (DE)	Q6VN20	3403.64	36
130	A(+42.01)AATGAVAASAASGQ	-	M	AAATGAVAASAASGQ	A	Acetylation (Protein N-term)	Q9NWH9	1244.6	15
131	A(+42.01)AATGAVAASAASGQAE(+43.04)	-	M	AAATGAVAASAASGQAE	G	Acetylation (Protein N-term); ethanolamine (DE)	Q9NWH9	1487.72	17
132	A(+42.01)AATGAVAASAASGQAE(+43.04)G	-	M	AAATGAVAASAASGQAEG	K	Acetylation (Protein N-term); ethanolamine (DE)	Q9NWH9	1544.74	18
133	A(+42.01)AATGAVAASAASGQAE(+43.04)GK	-	M	AAATGAVAASAASGQAEGK	K	Acetylation (Protein N-term); ethanolamine (DE)	Q9NWH9	1672.84	19
134	A(+42.01)AATGAVAASAASGQAEGK	-	M	AAATGAVAASAASGQAEGK	K	Acetylation (Protein N-term)	Q9NWH9	1629.8	19
135	A(+42.01)AATGAVAASAASGQAEGK(+43.04)	-	M	AAATGAVAASAASGQAEGK	K	Acetylation (Protein N-term); ethanolamine (C-term)	Q9NWH9	1672.84	19
136	A(+42.01)AATGD(+43.04)PGLS	-	M	AAATGDPGLS	K	Acetylation (Protein N-term); ethanolamine (DE)	O95352	943.461	10
137	A(+42.01)AATGPSFWLGNE(+43.04)TL	-	M	AAATGPSFWLGNETL	K	Acetylation (Protein N-term); ethanolamine (DE)	P12955	1618.8	15
138	A(+42.01)AATIVHD(+43.04)TSE(+43.04)AVE(+43.04)LC(+57.02)PAYGLYL	-	M	AAATIVHDTSEAVELCPAYGLYL	K	Acetylation (Protein N-term); ethanolamine (DE); ethanolamine (DE); ethanolamine (DE); Carbamidomethylation	Q02040	2634.34	23
139	A(+42.01)AAVAAAGAGE(+43.04)PQ	-	M	AAAVAAAGAGEPQ	S	Acetylation (Protein N-term); ethanolamine (DE)	Q9NS69	1167.59	13
140	A(+42.01)AAVAAAGAGE(+43.04)PQSPD(+43.04)	-	M	AAAVAAAGAGEPQSPD	E	Acetylation (Protein N-term); ethanolamine (DE); ethanolamine (DE)	Q9NS69	1509.74	16
141	A(+42.01)AAVAAAGAGE(+43.04)PQSPD(+43.04)E(+43.04)LLP	-	M	AAAVAAAGAGEPQSPDELLP	K	Acetylation (Protein N-term); ethanolamine (DE); ethanolamine (DE); ethanolamine (DE)	Q9NS69	2005.05	20
142	A(+42.01)AAVAAAGAGE(+43.04)PQSPDE(+43.04)L(+43.04)	-	M	AAAVAAAGAGEPQSPDEL	L	Acetylation (Protein N-term); ethanolamine (DE); ethanolamine (DE); ethanolamine (C-term)	Q9NS69	1794.91	18
143	A(+42.01)AAVAAPLAAGGE(+43.04)E(+43.04)AAATTSVPGSPGLPGR	-	M	AAAVAAPLAAGGEEAAATTSVPGSPGLPGR	R	Acetylation (Protein N-term); ethanolamine (DE); ethanolamine (DE)	O75427	2744.45	30
144	A(+42.01)AAVAVAAAS	-	M	AAAVAVAAAS	R	Acetylation (Protein N-term)	Q7Z5L9	842.45	10
145	A(+42.01)AAVLSGPSAGSAAGVPGGTGGLSAVSSGPR	-	M	AAAVLSGPSAGSAAGVPGGTGGLSAVSSGPR	L	Acetylation (Protein N-term)	Q8IZL8	2607.33	31
146	A(+42.01)AAVLSGPSAGSAAGVPGGTGGLSAVSSGPRL	-	M	AAAVLSGPSAGSAAGVPGGTGGLSAVSSGPRL	R	Acetylation (Protein N-term)	Q8IZL8	2720.41	32
147	A(+42.01)AAVSSVVR	-	M	AAAVSSVVR	R	Acetylation (Protein N-term)	A6NDU8	900.503	9
148	A(+42.01)AAVVVAE(+43.04)GD(+43.04)	-	M	AAAVVVAEGD	S	Acetylation (Protein N-term); ethanolamine (DE); ethanolamine (DE)	Q9UJX6	1028.55	10
149	A(+42.01)AAVVVAE(+43.04)GD(+43.04)SD(+43.04)	-	M	AAAVVVAEGDSD	S	Acetylation (Protein N-term); ethanolamine (DE); ethanolamine (DE); ethanolamine (DE)	Q9UJX6	1273.65	12
150	A(+42.01)AAVVVAE(+43.04)GD(+43.04)SD(+43.04)S	-	M	AAAVVVAEGDSDS	R	Acetylation (Protein N-term); ethanolamine (DE); ethanolamine (DE); ethanolamine (DE)	Q9UJX6	1360.68	13
151	A(+42.01)AAYLD(+43.04)PNLNHTPNSST	-	M	AAAYLDPNLNHTPNSST	K	Acetylation (Protein N-term); ethanolamine (DE)	Q05397	1869.89	17
152	A(+42.01)AD(+43.04)ISE(+43.04)SSGAD(+43.04)C(+57.02)	-	M	AADISESSGADC	K	Acetylation (Protein N-term); ethanolamine (DE); ethanolamine (DE); ethanolamine (DE); Carbamidomethylation	O43583	1352.59	12
153	A(+42.01)AD(+43.04)ISE(+43.04)SSGADC(+57.02)	-	M	AADISESSGADC	K	Acetylation (Protein N-term); ethanolamine (DE); ethanolamine (DE); Carbamidomethylation	O43583	1309.55	12
154	A(+42.01)AD(+43.04)TQVSE(+43.04)TL	-	M	AADTQVSETL	K	Acetylation (Protein N-term); ethanolamine (DE); ethanolamine (DE)	Q92616	1161.59	10
155	A(+42.01)AD(+43.04)TQVSE(+43.04)TLK	-	M	AADTQVSETLK	R	Acetylation (Protein N-term); ethanolamine (DE); ethanolamine (DE)	Q92616	1289.68	11
156	A(+42.01)AD(+43.04)VSVTH	-	M	AADVSVTH	R	Acetylation (Protein N-term); ethanolamine (DE)	Q8IY67	883.44	8
157	A(+42.01)ADISE(+43.04)SSGAD(+43.04)C(+57.02)	-	M	AADISESSGADC	K	Acetylation (Protein N-term); ethanolamine (DE); ethanolamine (DE); Carbamidomethylation	O43583	1309.55	12
158	A(+42.01)AE(+43.04)AAD(+43.04)LGLGAAVPVE(+43.04)L	-	M	AAEAADLGLGAAVPVEL	R	Acetylation (Protein N-term); ethanolamine (DE); ethanolamine (DE); ethanolamine (DE)	Q9Y5Q8	1736.97	17
159	A(+42.01)AE(+43.04)AAD(+43.04)LGLGAAVPVEL(+43.04)	-	M	AAEAADLGLGAAVPVEL	R	Acetylation (Protein N-term); ethanolamine (DE); ethanolamine (DE); ethanolamine (C-term)	Q9Y5Q8	1736.97	17
160	A(+42.01)AE(+43.04)AADLGLGAAVPVEL(+43.04)	-	M	AAEAADLGLGAAVPVEL	R	Acetylation (Protein N-term); ethanolamine (DE); ethanolamine (C-term)	Q9Y5Q8	1693.92	17
161	A(+42.01)AE(+43.04)AAGGKY	-	M	AAEAAGGKY	R	Acetylation (Protein N-term); ethanolamine (DE)	Q96A65	921.456	9
162	A(+42.01)AE(+43.04)AD(+43.04)GPLK	-	M	AAEADGPLK	R	Acetylation (Protein N-term); ethanolamine (DE); ethanolamine (DE)	O75352	998.54	9
163	A(+42.01)AE(+43.04)ADGPLK	-	M	AAEADGPLK	R	Acetylation (Protein N-term); ethanolamine (DE)	O75352	955.497	9
164	A(+42.01)AE(+43.04)ATAVAGSGAVGGC(+57.02)LA	-	M	AAEATAVAGSGAVGGCLA	K	Acetylation (Protein N-term); ethanolamine (DE); Carbamidomethylation	Q9Y259	1616.78	18
165	A(+42.01)AE(+43.04)D(+43.04)VVATGAD(+43.04)PSDL(+43.04)	-	M	AAEDVVATGADPSDL	E	Acetylation (Protein N-term); ethanolamine (DE); ethanolamine (DE); ethanolamine (DE); ethanolamine (C-term)	O00264	1643.84	15
166	A(+42.01)AE(+43.04)E(+43.04)PQQQ	-	M	AAEEPQQQ	K	Acetylation (Protein N-term); ethanolamine (DE); ethanolamine (DE)	Q96FW1	1027.49	8
167	A(+42.01)AE(+43.04)E(+43.04)VLQTVD(+43.04)HY	-	M	AAEEVLQTVDHY	K	Acetylation (Protein N-term); ethanolamine (DE); ethanolamine (DE); ethanolamine (DE)	Q96G01	1544.78	12
168	A(+42.01)AE(+43.04)PVE(+43.04)D(+43.04)NC(+57.02)INFVAM	-	M	AAEPVEDNCINFVAM	K	Acetylation (Protein N-term); ethanolamine (DE); ethanolamine (DE); ethanolamine (DE); Carbamidomethylation	Q14116	1849.87	15
169	A(+42.01)AE(+43.04)PVE(+43.04)D(+43.04)NC(+57.02)INFVAM(+15.99)	-	M	AAEPVEDNCINFVAM	K	Acetylation (Protein N-term); ethanolamine (DE); ethanolamine (DE); ethanolamine (DE); Carbamidomethylation; more	Q14116	1865.87	15
170	A(+42.01)AE(+43.04)SGSD(+43.04)FQQ	-	M	AAESGSDFQQ	R	Acetylation (Protein N-term); ethanolamine (DE); ethanolamine (DE)	Q96BP3	1166.52	10
171	A(+42.01)AE(+43.04)TLNFGPE(+43.04)WL	-	M	AAETLNFGPEWL	R	Acetylation (Protein N-term); ethanolamine (DE); ethanolamine (DE)	O75420	1474.75	12
172	A(+42.01)AE(+43.04)TQTLNFGPE(+43.04)WL	-	M	AAETQTLNFGPEWL	R	Acetylation (Protein N-term); ethanolamine (DE); ethanolamine (DE)	Q6Y7W6	1703.85	14
173	A(+42.01)AFGILSYE(+43.04)H	-	M	AAFGILSYEH	R	Acetylation (Protein N-term); ethanolamine (DE)	Q93074	1191.59	10
174	A(+42.01)AFSE(+43.04)M(+15.99)GVM(+15.99)PE(+43.04)IAQ	-	M	AAFSEMGVMPEIAQ	A	Acetylation (Protein N-term); ethanolamine (DE); Oxidation (M); Oxidation (M); ethanolamine (DE)	Q92499	1639.76	14
175	A(+42.01)AFSE(+43.04)MGVM(+15.99)PE(+43.04)IAQ	-	M	AAFSEMGVMPEIAQ	A	Acetylation (Protein N-term); ethanolamine (DE); Oxidation (M); ethanolamine (DE)	Q92499	1623.76	14
176	A(+42.01)AFSE(+43.04)MGVMPE(+43.04)I	-	M	AAFSEMGVMPEI	A	Acetylation (Protein N-term); ethanolamine (DE); ethanolamine (DE)	Q92499	1408.67	12
177	A(+42.01)AFSE(+43.04)MGVMPE(+43.04)IAQ	-	M	AAFSEMGVMPEIAQ	A	Acetylation (Protein N-term); ethanolamine (DE); ethanolamine (DE)	Q92499	1607.77	14
178	A(+42.01)AFSE(+43.04)MGVMPE(+43.04)IAQAVE(+43.04)E(+43.04)M(+15.99)	-	M	AAFSEMGVMPEIAQAVEEM	D	Acetylation (Protein N-term); ethanolamine (DE); ethanolamine (DE); ethanolamine (DE); ethanolamine (DE); more	Q92499	2269.08	19
179	A(+42.01)AFSE(+43.04)MGVMPEIAQ	-	M	AAFSEMGVMPEIAQ	A	Acetylation (Protein N-term); ethanolamine (DE)	Q92499	1564.73	14
180	A(+42.01)AGAAE(+43.04)AAVAAVE(+43.04)	-	M	AAGAAEAAVAAVE	E	Acetylation (Protein N-term); ethanolamine (DE); ethanolamine (DE)	O76003	1227.65	13
181	A(+42.01)AGAAE(+43.04)AAVAAVE(+43.04)E(+43.04)VG	-	M	AAGAAEAAVAAVEEVG	S	Acetylation (Protein N-term); ethanolamine (DE); ethanolamine (DE); ethanolamine (DE)	O76003	1555.82	16
182	A(+42.01)AGAGTAGPASGPGVV	-	M	AAGAGTAGPASGPGVV	R	Acetylation (Protein N-term)	Q15554	1280.64	16
183	A(+42.01)AGC(+57.02)SE(+43.04)APRPAAASD(+43.04)	-	M	AAGCSEAPRPAAASD	G	Acetylation (Protein N-term); Carbamidomethylation; ethanolamine (DE); ethanolamine (DE)	Q3B726	1557.72	15
184	A(+42.01)AGGAE(+43.04)GGSGPGAAM(+15.99)GD(+43.04)C(+57.02)AEI(+43.04)	-	M	AAGGAEGGSGPGAAMGDCAEI	K	Acetylation (Protein N-term); ethanolamine (DE); Oxidation (M); ethanolamine (DE); Carbamidomethylation; more	Q09019	1991.87	21
185	A(+42.01)AGGAE(+43.04)GGSGPGAAMGD(+43.04)C(+57.02)AE(+43.04)I	-	M	AAGGAEGGSGPGAAMGDCAEI	K	Acetylation (Protein N-term); ethanolamine (DE); ethanolamine (DE); Carbamidomethylation; ethanolamine (DE)	Q09019	1975.87	21
186	A(+42.01)AGGAVAAAPE(+43.04)C(+57.02)	-	M	AAGGAVAAAPEC	R	Acetylation (Protein N-term); ethanolamine (DE); Carbamidomethylation	Q9UL63	1128.52	12
187	A(+42.01)AGGD(+43.04)HGSPD(+43.04)	-	M	AAGGDHGSPD	S	Acetylation (Protein N-term); ethanolamine (DE); ethanolamine (DE)	P30566	1010.44	10
188	A(+42.01)AGGD(+43.04)HGSPD(+43.04)SY	-	M	AAGGDHGSPDSY	R	Acetylation (Protein N-term); ethanolamine (DE); ethanolamine (DE)	P30566	1260.54	12
189	A(+42.01)AGGDHGSPD(+43.04)SY	-	M	AAGGDHGSPDSY	R	Acetylation (Protein N-term); ethanolamine (DE)	P30566	1217.49	12
190	A(+42.01)AGGGGSC(+57.02)D(+43.04)PLAPAGVPC(+57.02)AFSPH	-	M	AAGGGGSCDPLAPAGVPCAFSPH	S	Acetylation (Protein N-term); Carbamidomethylation; ethanolamine (DE); Carbamidomethylation	Q15061	2237	23
191	A(+42.01)AGGGGSC(+57.02)D(+43.04)PLAPAGVPC(+57.02)AFSPHSQAY	-	M	AAGGGGSCDPLAPAGVPCAFSPHSQAY	F	Acetylation (Protein N-term); Carbamidomethylation; ethanolamine (DE); Carbamidomethylation	Q15061	2686.19	27
192	A(+42.01)AGGGGSC(+57.02)D(+43.04)PLAPAGVPC(+57.02)AFSPHSQAYF	-	M	AAGGGGSCDPLAPAGVPCAFSPHSQAYF	A	Acetylation (Protein N-term); Carbamidomethylation; ethanolamine (DE); Carbamidomethylation	Q15061	2833.26	28
193	A(+42.01)AGSE(+43.04)ATTPVIVAAGAGGE(+43.04)E(+43.04)GE(+43.04)HV	-	M	AAGSEATTPVIVAAGAGGEEGEHV	K	Acetylation (Protein N-term); ethanolamine (DE); ethanolamine (DE); ethanolamine (DE); ethanolamine (DE)	Q96EW2	2393.22	24
194	A(+42.01)AGTAAALAFLSQE(+43.04)	-	M	AAGTAAALAFLSQE	S	Acetylation (Protein N-term); ethanolamine (DE)	O75607	1404.72	14
195	A(+42.01)AGTAAALAFLSQE(+43.04)S	-	M	AAGTAAALAFLSQES	R	Acetylation (Protein N-term); ethanolamine (DE)	O75607	1491.76	15
196	A(+42.01)AGTAAALAFLSQE(+43.04)SR	-	M	AAGTAAALAFLSQESR	T	Acetylation (Protein N-term); ethanolamine (DE)	O75607	1647.86	16
197	A(+42.01)AGTAAALAFLSQES	-	M	AAGTAAALAFLSQES	R	Acetylation (Protein N-term)	O75607	1448.71	15
198	A(+42.01)AGTLY(+155.14)TYPE(+43.04)NW	-	M	AAGTLYTYPENW	R	Acetylation (Protein N-term); EDC(Y); ethanolamine (DE)	P26641	1624.83	12
199	A(+42.01)AGTLYTY(+155.14)PENW	-	M	AAGTLYTYPENW	R	Acetylation (Protein N-term); EDC(Y)	P26641	1581.78	12
200	A(+42.01)AGTLYTYPE(+43.04)N	-	M	AAGTLYTYPEN	W	Acetylation (Protein N-term); ethanolamine (DE)	P26641	1283.6	11
201	A(+42.01)AGTLYTYPE(+43.04)NW	-	M	AAGTLYTYPENW	R	Acetylation (Protein N-term); ethanolamine (DE)	P26641	1469.68	12
202	A(+42.01)AGTLYTYPE(+43.04)NWR	-	M	AAGTLYTYPENWR	A	Acetylation (Protein N-term); ethanolamine (DE)	P26641	1625.78	13
203	A(+42.01)AGTLYTYPENW	-	M	AAGTLYTYPENW	R	Acetylation (Protein N-term)	P26641	1426.64	12
204	A(+42.01)AGTSSYWE(+43.04)DL(+43.04)	-	M	AAGTSSYWEDL	R	Acetylation (Protein N-term); ethanolamine (DE); ethanolamine (C-term)	O95249	1326.61	11
205	A(+42.01)AGVE(+43.04)AAAE(+43.04)V	-	M	AAGVEAAAEV	A	Acetylation (Protein N-term); ethanolamine (DE); ethanolamine (DE)	P52272	1014.53	10
206	A(+42.01)AGVE(+43.04)AAAE(+43.04)VAATE(+43.04)	-	M	AAGVEAAAEVAATE	I	Acetylation (Protein N-term); ethanolamine (DE); ethanolamine (DE); ethanolamine (DE)	P52272	1429.74	14
207	A(+42.01)AGVE(+43.04)AAAE(+43.04)VAATE(+43.04)I	-	M	AAGVEAAAEVAATEI	K	Acetylation (Protein N-term); ethanolamine (DE); ethanolamine (DE); ethanolamine (DE)	P52272	1542.83	15
208	A(+42.01)AGVE(+43.04)AAAE(+43.04)VAATE(+43.04)IK	-	M	AAGVEAAAEVAATEIK	M	Acetylation (Protein N-term); ethanolamine (DE); ethanolamine (DE); ethanolamine (DE)	P52272	1670.92	16
209	A(+42.01)AGVE(+43.04)AAAE(+43.04)VAATEI	-	M	AAGVEAAAEVAATEI	K	Acetylation (Protein N-term); ethanolamine (DE); ethanolamine (DE)	P52272	1499.78	15
210	A(+42.01)AGVE(+43.04)AAAE(+43.04)VAATEI(+43.04)	-	M	AAGVEAAAEVAATEI	K	Acetylation (Protein N-term); ethanolamine (DE); ethanolamine (DE); ethanolamine (C-term)	P52272	1542.83	15
211	A(+42.01)AGVE(+43.04)AAAEVAATE(+43.04)I	-	M	AAGVEAAAEVAATEI	K	Acetylation (Protein N-term); ethanolamine (DE); ethanolamine (DE)	P52272	1499.78	15
212	A(+42.01)AGVEAAAE(+43.04)VAATE(+43.04)I	-	M	AAGVEAAAEVAATEI	K	Acetylation (Protein N-term); ethanolamine (DE); ethanolamine (DE)	P52272	1499.78	15
213	A(+42.01)AHGGSAASSAL	-	M	AAHGGSAASSAL	K	Acetylation (Protein N-term)	O94888	1040.49	12
214	A(+42.01)AIAASE(+43.04)VLVD(+43.04)	-	M	AAIAASEVLVD	S	Acetylation (Protein N-term); ethanolamine (DE); ethanolamine (DE)	O95926	1185.66	11
215	A(+42.01)AIAASE(+43.04)VLVD(+43.04)SAE(+43.04)E(+43.04)GSL	-	M	AAIAASEVLVDSAEEGSL	A	Acetylation (Protein N-term); ethanolamine (DE); ethanolamine (DE); ethanolamine (DE); ethanolamine (DE)	O95926	1945.04	18
216	A(+42.01)AIGVHLGC(+57.02)TSAC(+57.02)V	-	M	AAIGVHLGCTSACV	A	Acetylation (Protein N-term); Carbamidomethylation; Carbamidomethylation	Q0VDF9	1456.68	14
217	A(+42.01)AIYGGVE(+43.04)GGGT	-	M	AAIYGGVEGGGT	R	Acetylation (Protein N-term); ethanolamine (DE)	Q9UJ70	1135.55	12
218	A(+42.01)AIYGGVEGGGT(+43.04)	-	M	AAIYGGVEGGGT	R	Acetylation (Protein N-term); ethanolamine (C-term)	Q9UJ70	1135.55	12
219	A(+42.01)ALAE(+43.04)E(+43.04)QTE(+43.04)VAV	-	M	AALAEEQTEVAV	K	Acetylation (Protein N-term); ethanolamine (DE); ethanolamine (DE); ethanolamine (DE)	Q15542	1400.75	12
220	A(+42.01)ALAPLPPLPAQF	-	M	AALAPLPPLPAQF	K	Acetylation (Protein N-term)	Q9NP79	1346.76	13
221	A(+42.01)ALD(+43.04)SLSLFTSLGLSE(+43.04)Q	-	M	AALDSLSLFTSLGLSEQ	K	Acetylation (Protein N-term); ethanolamine (DE); ethanolamine (DE)	P47897	1878.99	17
222	A(+42.01)ALGHLAGE(+43.04)	-	M	AALGHLAGE	A	Acetylation (Protein N-term); ethanolamine (DE)	Q9H7E9	922.487	9
223	A(+42.01)ALGHLAGE(+43.04)A	-	M	AALGHLAGEA	A	Acetylation (Protein N-term); ethanolamine (DE)	Q9H7E9	993.524	10
224	A(+42.01)ALGHLAGE(+43.04)AA	-	M	AALGHLAGEAA	A	Acetylation (Protein N-term); ethanolamine (DE)	Q9H7E9	1064.56	11
225	A(+42.01)ALGHLAGE(+43.04)AAAAPGPG	-	M	AALGHLAGEAAAAPGPG	T	Acetylation (Protein N-term); ethanolamine (DE)	Q9H7E9	1514.78	17
226	A(+42.01)ALGHLAGE(+43.04)AAAAPGPGTPC(+57.02)AS	-	M	AALGHLAGEAAAAPGPGTPCAS	R	Acetylation (Protein N-term); ethanolamine (DE); Carbamidomethylation	Q9H7E9	2030.98	22
227	A(+42.01)ALGPSSQNVTE(+43.04)YVV	-	M	AALGPSSQNVTEYVV	R	Acetylation (Protein N-term); ethanolamine (DE)	P35269	1618.82	15
228	A(+42.01)ALGSPSHTF	-	M	AALGSPSHTF	R	Acetylation (Protein N-term)	Q96HJ9	1028.49	10
229	A(+42.01)ALGVAE(+43.04)AVAAPHPAE(+43.04)GAE(+43.04)TAE(+43.04)AVE(+43.04)LS	-	M	AALGVAEAVAAPHPAEGAETAEAVELS	R	Acetylation (Protein N-term); ethanolamine (DE); ethanolamine (DE); ethanolamine (DE); ethanolamine (DE); more	Q86Y56	2787.48	27
230	A(+42.01)ALHTTPD(+43.04)SPAAQLE(+43.04)	-	M	AALHTTPDSPAAQLE	R	Acetylation (Protein N-term); ethanolamine (DE); ethanolamine (DE)	A6NFI3	1648.84	15
231	A(+42.01)ALM(+15.99)TPGTGAPPAPGD(+43.04)FSGE(+43.04)GSQGLPD(+43.04)PSPEP(+43.04)	-	M	AALMTPGTGAPPAPGDFSGEGSQGLPDPSPEP	K	Acetylation (Protein N-term); Oxidation (M); ethanolamine (DE); ethanolamine (DE); ethanolamine (DE); more	P19971	3234.55	32
232	A(+42.01)ALMTPGTGAPPAPGD(+43.04)FSGE(+43.04)GSQGLPD(+43.04)PSPE(+43.04)P	-	M	AALMTPGTGAPPAPGDFSGEGSQGLPDPSPEP	K	Acetylation (Protein N-term); ethanolamine (DE); ethanolamine (DE); ethanolamine (DE); ethanolamine (DE)	P19971	3218.56	32
233	A(+42.01)ALTAE(+43.04)HF	-	M	AALTAEHF	A	Acetylation (Protein N-term); ethanolamine (DE)	Q9P000	943.476	8
234	A(+42.01)ALTAE(+43.04)HFA	-	M	AALTAEHFA	A	Acetylation (Protein N-term); ethanolamine (DE)	Q9P000	1014.51	9
235	A(+42.01)ALTAE(+43.04)HFAAL	-	M	AALTAEHFAAL	Q	Acetylation (Protein N-term); ethanolamine (DE)	Q9P000	1198.63	11
236	A(+42.01)ALTAE(+43.04)HFAALQ	-	M	AALTAEHFAALQ	S	Acetylation (Protein N-term); ethanolamine (DE)	Q9P000	1326.69	12
237	A(+42.01)ALTAE(+43.04)HFAALQSLL	-	M	AALTAEHFAALQSLL	K	Acetylation (Protein N-term); ethanolamine (DE)	Q9P000	1639.89	15
238	A(+42.01)ALVLE(+43.04)D(+43.04)GSVL	-	M	AALVLEDGSVL	R	Acetylation (Protein N-term); ethanolamine (DE); ethanolamine (DE)	P27708	1213.69	11
239	A(+42.01)ALVLE(+43.04)DGSVL	-	M	AALVLEDGSVL	R	Acetylation (Protein N-term); ethanolamine (DE)	P27708	1170.65	11
240	A(+42.01)ALVLED(+43.04)GSVL	-	M	AALVLEDGSVL	R	Acetylation (Protein N-term); ethanolamine (DE)	P27708	1170.65	11
241	A(+42.01)AM(+15.99)AVGGAGGS	-	M	AAMAVGGAGGS	R	Acetylation (Protein N-term); Oxidation (M)	O14744	905.391	11
242	A(+42.01)AMAVGGAGGS	-	M	AAMAVGGAGGS	R	Acetylation (Protein N-term)	O14744	889.396	11
243	A(+42.01)ANVGSM(+15.99)FQYW	-，-	M，M	AANVGSMFQYW	K，K	Acetylation (Protein N-term); Oxidation (M)	Q13948，O14529	1330.57	11
244	A(+42.01)ANYSSTSTR	-	M	AANYSSTSTR	R	Acetylation (Protein N-term)	Q9BTV4	1098.49	10
245	A(+42.01)APAGGGGSAVSVLAPNG	-	M	AAPAGGGGSAVSVLAPNG	R	Acetylation (Protein N-term)	Q9BZE9	1493.75	18
246	A(+42.01)APAPGLISVFSSSQE(+43.04)L	-	M	AAPAPGLISVFSSSQEL	G	Acetylation (Protein N-term); ethanolamine (DE)	O95336	1757.92	17
247	A(+42.01)APAQQTTQPGGG	-	M	AAPAQQTTQPGGG	K	Acetylation (Protein N-term)	Q9NXG2	1224.57	13
248	A(+42.01)APAQQTTQPGGGK	-	M	AAPAQQTTQPGGGK	R	Acetylation (Protein N-term)	Q9NXG2	1352.67	14
249	A(+42.01)APAQQTTQPGGGKR	-	M	AAPAQQTTQPGGGKR	K	Acetylation (Protein N-term)	Q9NXG2	1508.77	15
250	A(+42.01)APC(+57.02)E(+43.04)GQAFAVGVE(+43.04)	-	M	AAPCEGQAFAVGVE	K	Acetylation (Protein N-term); Carbamidomethylation; ethanolamine (DE); ethanolamine (DE)	Q86WB0	1532.73	14
251	A(+42.01)APE(+43.04)GSGLGE(+43.04)D(+43.04)A	-	M	AAPEGSGLGEDA	R	Acetylation (Protein N-term); ethanolamine (DE); ethanolamine (DE); ethanolamine (DE)	Q96G03	1243.6	12
252	A(+42.01)APGPALC(+57.02)LFD(+43.04)VD(+43.04)	-	M	AAPGPALCLFDVD	G	Acetylation (Protein N-term); Carbamidomethylation; ethanolamine (DE); ethanolamine (DE)	O15305	1472.73	13
253	A(+42.01)APGPALC(+57.02)LFD(+43.04)VDGTLTAP	-	M	AAPGPALCLFDVDGTLTAP	R	Acetylation (Protein N-term); Carbamidomethylation; ethanolamine (DE)	O15305	1969.98	19
254	A(+42.01)APLIPLSQQIPTGN	-	M	AAPLIPLSQQIPTGN	S	Acetylation (Protein N-term)	Q9UBC2	1560.85	15
255	A(+42.01)APME(+43.04)VAVC(+57.02)TD(+43.04)	-	M	AAPMEVAVCTD	S	Acetylation (Protein N-term); ethanolamine (DE); Carbamidomethylation; ethanolamine (DE)	Q9BV38	1290.59	11
256	A(+42.01)APPGE(+43.04)YFSVGSQVSC(+57.02)	-	M	AAPPGEYFSVGSQVSC	R	Acetylation (Protein N-term); ethanolamine (DE); Carbamidomethylation	Q3MHD2	1739.78	16
257	A(+42.01)APRPSPAISV	-	M	AAPRPSPAISV	S	Acetylation (Protein N-term)	Q15942	1106.61	11
258	A(+42.01)APRPSPAISVSVSAPAFYAPQ	-	M	AAPRPSPAISVSVSAPAFYAPQ	K	Acetylation (Protein N-term)	Q15942	2225.15	22
259	A(+42.01)APSAGSWSTFQH	-	M	AAPSAGSWSTFQH	K	Acetylation (Protein N-term)	P42575	1387.62	13
260	A(+42.01)APSE(+43.04)VAAIAPGE(+43.04)GD(+43.04)	-	M	AAPSEVAAIAPGEGD	G	Acetylation (Protein N-term); ethanolamine (DE); ethanolamine (DE); ethanolamine (DE)	Q96MW1	1524.78	15
261	A(+42.01)APSE(+43.04)VAAIAPGE(+43.04)GD(+43.04)GGGGGFGSWLD(+43.04)G	-	M	AAPSEVAAIAPGEGDGGGGGFGSWLDG	R	Acetylation (Protein N-term); ethanolamine (DE); ethanolamine (DE); ethanolamine (DE); ethanolamine (DE)	Q96MW1	2615.26	27
262	A(+42.01)APSE(+43.04)VAAIAPGE(+43.04)GD(+43.04)GGGGGFGSWLDG(+43.04)	-	M	AAPSEVAAIAPGEGDGGGGGFGSWLDG	R	Acetylation (Protein N-term); ethanolamine (DE); ethanolamine (DE); ethanolamine (DE); ethanolamine (C-term)	Q96MW1	2615.26	27
263	A(+42.01)APSE(+43.04)VAAIAPGE(+43.04)GDGGGGGFGSWLD(+43.04)G	-	M	AAPSEVAAIAPGEGDGGGGGFGSWLDG	R	Acetylation (Protein N-term); ethanolamine (DE); ethanolamine (DE); ethanolamine (DE)	Q96MW1	2572.22	27
264	A(+42.01)APSPSGGGGSGGGSGSGTPGPVGSPAPGHPAVSSM(+15.99)QGK	-	M	AAPSPSGGGGSGGGSGSGTPGPVGSPAPGHPAVSSMQGK	R	Acetylation (Protein N-term); Oxidation (M)	P45985	3300.51	39
265	A(+42.01)APVVAPPGVVVS	-	M	AAPVVAPPGVVVS	R	Acetylation (Protein N-term)	Q13144	1203.69	13
266	A(+42.01)AQAAAAAQAAAAQAAQ	-	M	AAQAAAAAQAAAAQAAQ	A	Acetylation (Protein N-term)	Q9Y6X3	1495.74	17
267	A(+42.01)AQALALL	-	M	AAQALALL	R	Acetylation (Protein N-term)	Q16401	811.48	8
268	A(+42.01)AQGE(+43.04)PQVQF	-	M	AAQGEPQVQF	K	Acetylation (Protein N-term); ethanolamine (DE)	P62826	1158.57	10
269	A(+42.01)AQGEPQVQF	-	M	AAQGEPQVQF	K	Acetylation (Protein N-term)	P62826	1115.52	10
270	A(+42.01)AQGVGPGPGSAAPPGLE(+43.04)AA	-，-	M，M	AAQGVGPGPGSAAPPGLEAA	R，R	Acetylation (Protein N-term); ethanolamine (DE)	Q6NZ67，Q6P582	1758.89	20
271	A(+42.01)AQIPIVATTSTPGIV	-	M	AAQIPIVATTSTPGIV	R	Acetylation (Protein N-term)	Q6PI98	1579.88	16
272	A(+42.01)AQVAPAAASSLGN	-	M	AAQVAPAAASSLGN	P	Acetylation (Protein N-term)	O14497	1268.64	14
273	A(+42.01)AQVAPAAASSLGNPPPPPPSE(+43.04)L	-	M	AAQVAPAAASSLGNPPPPPPSEL	K	Acetylation (Protein N-term); ethanolamine (DE)	O14497	2223.15	23
274	A(+42.01)AQVAPAAASSLGNPPPPPPSEL(+43.04)	-	M	AAQVAPAAASSLGNPPPPPPSEL	K	Acetylation (Protein N-term); ethanolamine (C-term)	O14497	2223.15	23
275	A(+42.01)ASAAAAE(+43.04)LQASGGP	-	M	AASAAAAELQASGGP	R	Acetylation (Protein N-term); ethanolamine (DE)	Q9HCN4	1355.67	15
276	A(+42.01)ASAAAAE(+43.04)LQASGGPR	-	M	AASAAAAELQASGGPR	H	Acetylation (Protein N-term); ethanolamine (DE)	Q9HCN4	1511.77	16
277	A(+42.01)ASAAAASAAAASAA	-	M	AASAAAASAAAASAA	S	Acetylation (Protein N-term)	Q13263	1173.56	15
278	A(+42.01)ASAAAASAAAASAAS	-	M	AASAAAASAAAASAAS	G	Acetylation (Protein N-term)	Q13263	1260.59	16
279	A(+42.01)ASAAAASAAAASAASG	-	M	AASAAAASAAAASAASG	S	Acetylation (Protein N-term)	Q13263	1317.62	17
280	A(+42.01)ASAAAASAAAASAASGSPGPGE(+43.04)GSAGGE(+43.04)	-	M	AASAAAASAAAASAASGSPGPGEGSAGGE	K	Acetylation (Protein N-term); ethanolamine (DE); ethanolamine (DE)	Q13263	2386.1	29
281	A(+42.01)ASAAAASAAAASAASGSPGPGE(+43.04)GSAGGE(+43.04)K	-	M	AASAAAASAAAASAASGSPGPGEGSAGGEK	R	Acetylation (Protein N-term); ethanolamine (DE); ethanolamine (DE)	Q13263	2514.19	30
282	A(+42.01)ASAAAASAAAASAASGSPGPGE(+43.04)GSAGGEK	-	M	AASAAAASAAAASAASGSPGPGEGSAGGEK	R	Acetylation (Protein N-term); ethanolamine (DE)	Q13263	2471.15	30
283	A(+42.01)ASAAAASAAAASAASGSPGPGE(+43.04)GSAGGEK(+43.04)	-	M	AASAAAASAAAASAASGSPGPGEGSAGGEK	R	Acetylation (Protein N-term); ethanolamine (DE); ethanolamine (C-term)	Q13263	2514.19	30
284	A(+42.01)ASAAAASAAAASAASGSPGPGEGSAGGE(+43.04)K	-	M	AASAAAASAAAASAASGSPGPGEGSAGGEK	R	Acetylation (Protein N-term); ethanolamine (DE)	Q13263	2471.15	30
285	A(+42.01)ASALYAC(+57.02)T	-	M	AASALYACT	K	Acetylation (Protein N-term); Carbamidomethylation	Q5HYJ3	968.427	9
286	A(+42.01)ASC(+57.02)VLLHTGQ	-	M	AASCVLLHTGQ	K	Acetylation (Protein N-term); Carbamidomethylation	P14550	1197.58	11
287	A(+42.01)ASE(+43.04)AAVVSSPSL	-	M	AASEAAVVSSPSL	K	Acetylation (Protein N-term); ethanolamine (DE)	Q8WWH5	1272.66	13
288	A(+42.01)ASE(+43.04)VAGVVANAPSPPE(+43.04)SSSLC(+57.02)AS	-	M	AASEVAGVVANAPSPPESSSLCAS	K	Acetylation (Protein N-term); ethanolamine (DE); ethanolamine (DE); Carbamidomethylation	Q8ND24	2385.15	24
289	A(+42.01)ASGAVE(+43.04)PGPPGA	-	M	AASGAVEPGPPGA	A	Acetylation (Protein N-term); ethanolamine (DE)	O75312	1164.58	13
290	A(+42.01)ASGAVE(+43.04)PGPPGAAVAPSPAPAPPPAPD(+43.04)	-	M	AASGAVEPGPPGAAVAPSPAPAPPPAPD	H	Acetylation (Protein N-term); ethanolamine (DE); ethanolamine (DE)	O75312	2543.3	28
291	A(+42.01)ASGAVE(+43.04)PGPPGAAVAPSPAPAPPPAPD(+43.04)HLF	-	M	AASGAVEPGPPGAAVAPSPAPAPPPAPDHLF	R	Acetylation (Protein N-term); ethanolamine (DE); ethanolamine (DE)	O75312	2940.51	31
292	A(+42.01)ASGE(+43.04)SGTSGGGGSTE(+43.04)	-	M	AASGESGTSGGGGSTE	E	Acetylation (Protein N-term); ethanolamine (DE); ethanolamine (DE)	O75937	1438.62	16
293	A(+42.01)ASGE(+43.04)SGTSGGGGSTE(+43.04)E(+43.04)A	-	M	AASGESGTSGGGGSTEEA	F	Acetylation (Protein N-term); ethanolamine (DE); ethanolamine (DE); ethanolamine (DE)	O75937	1681.74	18
294	A(+42.01)ASGE(+43.04)SGTSGGGGSTE(+43.04)E(+43.04)AF	-	M	AASGESGTSGGGGSTEEAF	M	Acetylation (Protein N-term); ethanolamine (DE); ethanolamine (DE); ethanolamine (DE)	O75937	1828.81	19
295	A(+42.01)ASGE(+43.04)SGTSGGGGSTE(+43.04)E(+43.04)AFMTFYSE(+43.04)V	-	M	AASGESGTSGGGGSTEEAFMTFYSEV	K	Acetylation (Protein N-term); ethanolamine (DE); ethanolamine (DE); ethanolamine (DE); ethanolamine (DE)	O75937	2729.21	26
296	A(+42.01)ASGSGMAQ	-	M	AASGSGMAQ	K	Acetylation (Protein N-term)	Q92905	820.338	9
297	A(+42.01)ASPGSGSANPR	-	M	AASPGSGSANPR	K	Acetylation (Protein N-term)	Q6UUV7	1112.52	12
298	A(+42.01)ASQAVE(+43.04)E(+43.04)M	-	M	AASQAVEEM	R	Acetylation (Protein N-term); ethanolamine (DE); ethanolamine (DE)	O15160	1062.5	9
299	A(+42.01)ASQAVE(+43.04)E(+43.04)M(+15.99)	-	M	AASQAVEEM	R	Acetylation (Protein N-term); ethanolamine (DE); ethanolamine (DE); Oxidation (M)	O15160	1078.5	9
300	A(+42.01)ASQAVE(+43.04)E(+43.04)M(+15.99)RS	-	M	AASQAVEEMRS	R	Acetylation (Protein N-term); ethanolamine (DE); ethanolamine (DE); Oxidation (M)	O15160	1321.63	11
301	A(+42.01)ASQAVE(+43.04)EM(+15.99)(+43.04)	-	M	AASQAVEEM	R	Acetylation (Protein N-term); ethanolamine (DE); Oxidation (M); ethanolamine (C-term)	O15160	1078.5	9
302	A(+42.01)ASQAVEE(+43.04)M	-	M	AASQAVEEM	R	Acetylation (Protein N-term); ethanolamine (DE)	O15160	1019.46	9
303	A(+42.01)ASQTSQTVASHVPFAD(+43.04)LC(+57.02)STLE(+43.04)	-	M	AASQTSQTVASHVPFADLCSTLE	R	Acetylation (Protein N-term); ethanolamine (DE); Carbamidomethylation; ethanolamine (DE)	P49917	2547.23	23
304	A(+42.01)ASSSSSSAGGVSGSSVTGSGFSVSD(+43.04)LAPPR	-	M	AASSSSSSAGGVSGSSVTGSGFSVSDLAPPR	K	Acetylation (Protein N-term); ethanolamine (DE)	Q96DE5	2840.34	31
305	A(+42.01)ASTSM(+15.99)VPVAVTAAVAPVL	-	M	AASTSMVPVAVTAAVAPVL	S	Acetylation (Protein N-term); Oxidation (M)	Q9UJX2	1811.97	19
306	A(+42.01)ATAAAVVAE(+43.04)E(+43.04)D(+43.04)	-	M	AATAAAVVAEED	T	Acetylation (Protein N-term); ethanolamine (DE); ethanolamine (DE); ethanolamine (DE)	O95684	1287.67	12
307	A(+42.01)ATAAAVVAE(+43.04)E(+43.04)D(+43.04)TE(+43.04)L	-	M	AATAAAVVAEEDTEL	R	Acetylation (Protein N-term); ethanolamine (DE); ethanolamine (DE); ethanolamine (DE); ethanolamine (DE)	O95684	1673.88	15
308	A(+42.01)ATAAAVVAE(+43.04)ED(+43.04)(+43.04)	-	M	AATAAAVVAEED	T	Acetylation (Protein N-term); ethanolamine (DE); ethanolamine (C-term); ethanolamine (DE)	O95684	1287.67	12
309	A(+42.01)ATAAE(+43.04)AVASGSGE(+43.04)P	-	M	AATAAEAVASGSGEP	R	Acetylation (Protein N-term); ethanolamine (DE); ethanolamine (DE)	Q9NWT6	1415.69	15
310	A(+42.01)ATASAGAGGID(+43.04)	-	M	AATASAGAGGID	G	Acetylation (Protein N-term); ethanolamine (DE)	Q02978	1045.5	12
311	A(+42.01)ATASAGAGGID(+43.04)G	-	M	AATASAGAGGIDG	K	Acetylation (Protein N-term); ethanolamine (DE)	Q02978	1102.53	13
312	A(+42.01)ATASAGAGGID(+43.04)GKP	-	M	AATASAGAGGIDGKP	R	Acetylation (Protein N-term); ethanolamine (DE)	Q02978	1327.67	15
313	A(+42.01)ATASAGAGGIDG	-	M	AATASAGAGGIDG	K	Acetylation (Protein N-term)	Q02978	1059.48	13
314	A(+42.01)ATASAGAGGIDG(+43.04)	-	M	AATASAGAGGIDG	K	Acetylation (Protein N-term); ethanolamine (C-term)	Q02978	1102.53	13
315	A(+42.01)ATASAGAGGIDGKP	-	M	AATASAGAGGIDGKP	R	Acetylation (Protein N-term)	Q02978	1284.63	15
316	A(+42.01)ATASAGAGGIDGKPR	-	M	AATASAGAGGIDGKPR	T	Acetylation (Protein N-term)	Q02978	1440.73	16
317	A(+42.01)ATASAGVPATVSE(+43.04)	-	M	AATASAGVPATVSE	K	Acetylation (Protein N-term); ethanolamine (DE)	O60518	1315.66	14
318	A(+42.01)ATE(+43.04)GVGE(+43.04)AAQGGE(+43.04)PGQPAQPPPQPHPPPPQQQH	-	M	AATEGVGEAAQGGEPGQPAQPPPQPHPPPPQQQH	K	Acetylation (Protein N-term); ethanolamine (DE); ethanolamine (DE); ethanolamine (DE)	P49354	3557.74	34
319	A(+42.01)ATE(+43.04)PILAATGSPAAVPPE(+43.04)	-	M	AATEPILAATGSPAAVPPE	K	Acetylation (Protein N-term); ethanolamine (DE); ethanolamine (DE)	P57086	1890.01	19
320	A(+42.01)ATFFGE(+43.04)VV	-	M	AATFFGEVV	K	Acetylation (Protein N-term); ethanolamine (DE)	O95456	1024.52	9
321	A(+42.01)ATM(+15.99)KKAAAED(+43.04)VNVTFE(+43.04)D(+43.04)QQ	-	M	AATMKKAAAEDVNVTFEDQQ	K	Acetylation (Protein N-term); Oxidation (M); ethanolamine (DE); ethanolamine (DE); ethanolamine (DE)	Q9NQP4	2353.16	20
322	A(+42.01)ATMKKAAAED(+43.04)VNVTFE(+43.04)D(+43.04)QQ	-	M	AATMKKAAAEDVNVTFEDQQ	K	Acetylation (Protein N-term); ethanolamine (DE); ethanolamine (DE); ethanolamine (DE)	Q9NQP4	2337.16	20
323	A(+42.01)ATMKKAAAED(+43.04)VNVTFED(+43.04)QQ(+43.04)	-	M	AATMKKAAAEDVNVTFEDQQ	K	Acetylation (Protein N-term); ethanolamine (DE); ethanolamine (DE); ethanolamine (C-term)	Q9NQP4	2337.16	20
324	A(+42.01)ATSGTD(+43.04)E(+43.04)PVSGE(+43.04)LVSVAHAL	-	M	AATSGTDEPVSGELVSVAHAL	S	Acetylation (Protein N-term); ethanolamine (DE); ethanolamine (DE); ethanolamine (DE)	Q9BVG4	2181.13	21
325	A(+42.01)AVAGSGAAAAPSSL	-	M	AAVAGSGAAAAPSSL	L	Acetylation (Protein N-term)	Q66K74	1241.63	15
326	A(+42.01)AVATC(+57.02)GSVAASTGSAVATAS	-	M	AAVATCGSVAASTGSAVATAS	K	Acetylation (Protein N-term); Carbamidomethylation	Q96EB1	1850.87	21
327	A(+42.01)AVD(+43.04)SD(+43.04)VE(+43.04)SLPR	-	M	AAVDSDVESLPR	G	Acetylation (Protein N-term); ethanolamine (DE); ethanolamine (DE); ethanolamine (DE)	Q9H6E5	1428.76	12
328	A(+42.01)AVGAGGSTAAPGPGAVSAGALE(+43.04)PGTASAAH	-	M	AAVGAGGSTAAPGPGAVSAGALEPGTASAAH	R	Acetylation (Protein N-term); ethanolamine (DE)	P78381	2615.29	31
329	A(+42.01)AVGPPQQQV	-	M	AAVGPPQQQV	R	Acetylation (Protein N-term)	Q8WU17	1035.53	10
330	A(+42.01)AVLNAE(+43.04)	-	M	AAVLNAE	R	Acetylation (Protein N-term); ethanolamine (DE)	Q9H3P7	771.413	7
331	A(+42.01)AVLQQVLE(+43.04)	-	M	AAVLQQVLE	R	Acetylation (Protein N-term); ethanolamine (DE)	P12270	1054.6	9
332	A(+42.01)AVPE(+43.04)LLQQQE(+43.04)E(+43.04)D(+43.04)	-	M	AAVPELLQQQEED	R	Acetylation (Protein N-term); ethanolamine (DE); ethanolamine (DE); ethanolamine (DE); ethanolamine (DE)	Q9Y5X3	1682.88	13
333	A(+42.01)AVPE(+43.04)LLQQQE(+43.04)E(+43.04)D(+43.04)RS	-	M	AAVPELLQQQEEDRS	K	Acetylation (Protein N-term); ethanolamine (DE); ethanolamine (DE); ethanolamine (DE); ethanolamine (DE)	Q9Y5X3	1926.02	15
334	A(+42.01)AVPE(+43.04)LLQQQE(+43.04)E(+43.04)DR(+43.04)	-	M	AAVPELLQQQEEDR	S	Acetylation (Protein N-term); ethanolamine (DE); ethanolamine (DE); ethanolamine (DE); ethanolamine (C-term)	Q9Y5X3	1838.98	14
335	A(+42.01)AVPE(+43.04)LLQQQE(+43.04)E(+43.04)DRS(+43.04)	-	M	AAVPELLQQQEEDRS	K	Acetylation (Protein N-term); ethanolamine (DE); ethanolamine (DE); ethanolamine (DE); ethanolamine (C-term)	Q9Y5X3	1926.02	15
336	A(+42.01)AVPE(+43.04)LLQQQE(+43.04)ED(+43.04)(+43.04)	-	M	AAVPELLQQQEED	R	Acetylation (Protein N-term); ethanolamine (DE); ethanolamine (DE); ethanolamine (C-term); ethanolamine (DE)	Q9Y5X3	1682.88	13
337	A(+42.01)AVPE(+43.04)LLQQQE(+43.04)ED(+43.04)RS	-	M	AAVPELLQQQEEDRS	K	Acetylation (Protein N-term); ethanolamine (DE); ethanolamine (DE); ethanolamine (DE)	Q9Y5X3	1882.97	15
338	A(+42.01)AVPQNNLQE(+43.04)QLE(+43.04)	-	M	AAVPQNNLQEQLE	R	Acetylation (Protein N-term); ethanolamine (DE); ethanolamine (DE)	P54132	1580.82	13
339	A(+42.01)AVQAAE(+43.04)V	-	M	AAVQAAEV	K	Acetylation (Protein N-term); ethanolamine (DE)	Q15046	842.45	8
340	A(+42.01)AVQAAE(+43.04)VK	-	M	AAVQAAEVK	V	Acetylation (Protein N-term); ethanolamine (DE)	Q15046	970.545	9
341	A(+42.01)AVQM(+15.99)D(+43.04)PE(+43.04)LA	-	M	AAVQMDPELA	K	Acetylation (Protein N-term); Oxidation (M); ethanolamine (DE); ethanolamine (DE)	Q9Y312	1187.59	10
342	A(+42.01)AVQMD(+43.04)PE(+43.04)LA	-	M	AAVQMDPELA	K	Acetylation (Protein N-term); ethanolamine (DE); ethanolamine (DE)	Q9Y312	1171.59	10
343	A(+42.01)AVQVVGSWPSVQP	-	M	AAVQVVGSWPSVQP	R	Acetylation (Protein N-term)	Q6AI08	1465.76	14
344	A(+42.01)AVVE(+43.04)VE(+43.04)VGGGAAGE(+43.04)	-	M	AAVVEVEVGGGAAGE	R	Acetylation (Protein N-term); ethanolamine (DE); ethanolamine (DE); ethanolamine (DE)	Q9H920	1484.78	15
345	A(+42.01)C(+57.02)GLVASN	-	M	ACGLVASN	L	Acetylation (Protein N-term); Carbamidomethylation	P09382	832.375	8
346	A(+42.01)C(+57.02)GLVASNL	-	M	ACGLVASNL	N	Acetylation (Protein N-term); Carbamidomethylation	P09382	945.459	9
347	A(+42.01)C(+57.02)GLVASNLN	-	M	ACGLVASNLN	L	Acetylation (Protein N-term); Carbamidomethylation	P09382	1059.5	10
348	A(+42.01)C(+57.02)GLVASNLNL	-	M	ACGLVASNLNL	K	Acetylation (Protein N-term); Carbamidomethylation	P09382	1172.59	11
349	A(+42.01)C(+57.02)PALGLE(+43.04)ALQPLQPE(+43.04)PPPE(+43.04)PAF	-	M	ACPALGLEALQPLQPEPPPEPAF	S	Acetylation (Protein N-term); Carbamidomethylation; ethanolamine (DE); ethanolamine (DE); ethanolamine (DE)	Q9UPQ0	2612.37	23
350	A(+42.01)C(+57.02)PALGLE(+43.04)ALQPLQPE(+43.04)PPPE(+43.04)PAFSE(+43.04)AQ	-	M	ACPALGLEALQPLQPEPPPEPAFSEAQ	K	Acetylation (Protein N-term); Carbamidomethylation; ethanolamine (DE); ethanolamine (DE); ethanolamine (DE); more	Q9UPQ0	3070.58	27
351	A(+42.01)C(+57.02)TGPSLPSAFD(+43.04)ILGAAGQD(+43.04)	-	M	ACTGPSLPSAFDILGAAGQD	K	Acetylation (Protein N-term); Carbamidomethylation; ethanolamine (DE); ethanolamine (DE)	Q8IUC6	2075	20
352	A(+42.01)D(+43.04)AAASPVGK	-	M	ADAAASPVGK	R	Acetylation (Protein N-term); ethanolamine (DE)	Q7LBC6	970.508	10
353	A(+42.01)D(+43.04)AAATAGAGGSGT	-	M	ADAAATAGAGGSGT	R	Acetylation (Protein N-term); ethanolamine (DE)	Q7Z7C8	1161.53	14
354	A(+42.01)D(+43.04)AAPQLGK	-	M	ADAAPQLGK	R	Acetylation (Protein N-term); ethanolamine (DE)	Q96C86	954.513	9
355	A(+42.01)D(+43.04)AFGD(+43.04)E(+43.04)LF	-	M	ADAFGDELF	S	Acetylation (Protein N-term); ethanolamine (DE); ethanolamine (DE); ethanolamine (DE)	P42285	1154.56	9
356	A(+42.01)D(+43.04)AFGD(+43.04)E(+43.04)LFSVFE(+43.04)GD(+43.04)	-	M	ADAFGDELFSVFEGD	S	Acetylation (Protein N-term); ethanolamine (DE); ethanolamine (DE); ethanolamine (DE); ethanolamine (DE); more	P42285	1874.9	15
357	A(+42.01)D(+43.04)AFGD(+43.04)E(+43.04)LFSVFE(+43.04)GD(+43.04)STTAAGT	-	M	ADAFGDELFSVFEGDSTTAAGT	K	Acetylation (Protein N-term); ethanolamine (DE); ethanolamine (DE); ethanolamine (DE); ethanolamine (DE); more	P42285	2464.18	22
358	A(+42.01)D(+43.04)AFGD(+43.04)E(+43.04)LFSVFE(+43.04)GD(+43.04)STTAAGTK	-	M	ADAFGDELFSVFEGDSTTAAGTK	K	Acetylation (Protein N-term); ethanolamine (DE); ethanolamine (DE); ethanolamine (DE); ethanolamine (DE); more	P42285	2592.27	23
359	A(+42.01)D(+43.04)AWE(+43.04)E(+43.04)IR	-	M	ADAWEEIR	R	Acetylation (Protein N-term); ethanolamine (DE); ethanolamine (DE); ethanolamine (DE)	O94874	1159.6	8
360	A(+42.01)D(+43.04)D(+43.04)AGAAGGPGGPGGPGM(+15.99)GN	-	M	ADDAGAAGGPGGPGGPGMGN	R	Acetylation (Protein N-term); ethanolamine (DE); ethanolamine (DE); Oxidation (M)	P15880	1725.74	20
361	A(+42.01)D(+43.04)D(+43.04)AGAAGGPGGPGGPGMGN	-	M	ADDAGAAGGPGGPGGPGMGN	R	Acetylation (Protein N-term); ethanolamine (DE); ethanolamine (DE)	P15880	1709.74	20
362	A(+42.01)D(+43.04)D(+43.04)AGLE(+43.04)TPLC(+57.02)SE(+43.04)QFGSGE(+43.04)A	-	M	ADDAGLETPLCSEQFGSGEA	R	Acetylation (Protein N-term); ethanolamine (DE); ethanolamine (DE); ethanolamine (DE); Carbamidomethylation; more	Q96GQ5	2310.08	20
363	A(+42.01)D(+43.04)D(+43.04)ID(+43.04)IE(+43.04)AMLE(+43.04)APY	-	M	ADDIDIEAMLEAPY	K	Acetylation (Protein N-term); ethanolamine (DE); ethanolamine (DE); ethanolamine (DE); ethanolamine (DE); more	Q14498	1821.92	14
364	A(+42.01)D(+43.04)D(+43.04)ID(+43.04)IE(+43.04)AMLE(+43.04)APYK	-	M	ADDIDIEAMLEAPYK	K	Acetylation (Protein N-term); ethanolamine (DE); ethanolamine (DE); ethanolamine (DE); ethanolamine (DE); more	Q14498	1950.01	15
365	A(+42.01)D(+43.04)D(+43.04)LD(+43.04)FE(+43.04)TGD(+43.04)	-，-	M，M	ADDLDFETGD	A，A	Acetylation (Protein N-term); ethanolamine (DE); ethanolamine (DE); ethanolamine (DE); ethanolamine (DE); more	P63241，Q6IS14	1353.64	10
366	A(+42.01)D(+43.04)D(+43.04)LD(+43.04)FE(+43.04)TGD(+43.04)A	-，-	M，M	ADDLDFETGDA	G，G	Acetylation (Protein N-term); ethanolamine (DE); ethanolamine (DE); ethanolamine (DE); ethanolamine (DE); more	P63241，Q6IS14	1424.68	11
367	A(+42.01)D(+43.04)D(+43.04)LD(+43.04)FE(+43.04)TGD(+43.04)AG	-，-	M，M	ADDLDFETGDAG	A，A	Acetylation (Protein N-term); ethanolamine (DE); ethanolamine (DE); ethanolamine (DE); ethanolamine (DE); more	P63241，Q6IS14	1481.7	12
368	A(+42.01)D(+43.04)D(+43.04)LD(+43.04)FE(+43.04)TGD(+43.04)AGA	-，-	M，M	ADDLDFETGDAGA	S，S	Acetylation (Protein N-term); ethanolamine (DE); ethanolamine (DE); ethanolamine (DE); ethanolamine (DE); more	P63241，Q6IS14	1552.74	13
369	A(+42.01)D(+43.04)D(+43.04)LD(+43.04)FE(+43.04)TGD(+43.04)AGAS	-，-	M，M	ADDLDFETGDAGAS	A，A	Acetylation (Protein N-term); ethanolamine (DE); ethanolamine (DE); ethanolamine (DE); ethanolamine (DE); more	P63241，Q6IS14	1639.77	14
370	A(+42.01)D(+43.04)D(+43.04)LD(+43.04)FE(+43.04)TGD(+43.04)AGASA	-，-	M，M	ADDLDFETGDAGASA	T，T	Acetylation (Protein N-term); ethanolamine (DE); ethanolamine (DE); ethanolamine (DE); ethanolamine (DE); more	P63241，Q6IS14	1710.81	15
371	A(+42.01)D(+43.04)D(+43.04)LD(+43.04)FE(+43.04)TGD(+43.04)AGASAT	-，-	M，M	ADDLDFETGDAGASAT	F，F	Acetylation (Protein N-term); ethanolamine (DE); ethanolamine (DE); ethanolamine (DE); ethanolamine (DE); more	P63241，Q6IS14	1811.85	16
372	A(+42.01)D(+43.04)D(+43.04)LD(+43.04)FE(+43.04)TGD(+43.04)AGASATFPMQC(+57.02)SAL	-，-	M，M	ADDLDFETGDAGASATFPMQCSAL	R，R	Acetylation (Protein N-term); ethanolamine (DE); ethanolamine (DE); ethanolamine (DE); ethanolamine (DE); more	P63241，Q6IS14	2746.26	24
373	A(+42.01)D(+43.04)D(+43.04)LD(+43.04)FE(+43.04)TGDAGAS	-，-	M，M	ADDLDFETGDAGAS	A，A	Acetylation (Protein N-term); ethanolamine (DE); ethanolamine (DE); ethanolamine (DE); ethanolamine (DE)	P63241，Q6IS14	1596.73	14
374	A(+42.01)D(+43.04)D(+43.04)LD(+43.04)FE(+43.04)TGDAGASATFPMQC(+57.02)SAL	-，-	M，M	ADDLDFETGDAGASATFPMQCSAL	R，R	Acetylation (Protein N-term); ethanolamine (DE); ethanolamine (DE); ethanolamine (DE); ethanolamine (DE); more	P63241，Q6IS14	2703.22	24
375	A(+42.01)D(+43.04)D(+43.04)LDFE(+43.04)TGD(+43.04)AGASATFPMQC(+57.02)SAL	-，-	M，M	ADDLDFETGDAGASATFPMQCSAL	R，R	Acetylation (Protein N-term); ethanolamine (DE); ethanolamine (DE); ethanolamine (DE); ethanolamine (DE); more	P63241，Q6IS14	2703.22	24
376	A(+42.01)D(+43.04)D(+43.04)PSAAD(+43.04)	-	M	ADDPSAAD	R	Acetylation (Protein N-term); ethanolamine (DE); ethanolamine (DE); ethanolamine (DE)	P62495	931.425	8
377	A(+42.01)D(+43.04)D(+43.04)QGC(+57.02)IE(+43.04)E(+43.04)QGVED(+43.04)(+43.04)	-	M	ADDQGCIEEQGVED	S	Acetylation (Protein N-term); ethanolamine (DE); ethanolamine (DE); Carbamidomethylation; ethanolamine (DE); more	P55210	1863.86	14
378	A(+42.01)D(+43.04)E(+43.04)AALALQPGGSPSAAGAD(+43.04)	-	M	ADEAALALQPGGSPSAAGAD	R	Acetylation (Protein N-term); ethanolamine (DE); ethanolamine (DE); ethanolamine (DE)	Q96EB6	1938.96	20
379	A(+42.01)D(+43.04)E(+43.04)D(+43.04)GE(+43.04)GIHPSAPH	-	M	ADEDGEGIHPSAPH	R	Acetylation (Protein N-term); ethanolamine (DE); ethanolamine (DE); ethanolamine (DE); ethanolamine (DE)	Q96L92	1644.79	14
380	A(+42.01)D(+43.04)E(+43.04)DGE(+43.04)GIHPSAPH	-	M	ADEDGEGIHPSAPH	R	Acetylation (Protein N-term); ethanolamine (DE); ethanolamine (DE); ethanolamine (DE)	Q96L92	1601.74	14
381	A(+42.01)D(+43.04)FAGPSSAGR	-	M	ADFAGPSSAGR	K	Acetylation (Protein N-term); ethanolamine (DE)	Q8IXW5	1119.53	11
382	A(+42.01)D(+43.04)FD(+43.04)DRVSD(+43.04)E(+43.04)E(+43.04)KV	-	M	ADFDDRVSDEEKV	R	Acetylation (Protein N-term); ethanolamine (DE); ethanolamine (DE); ethanolamine (DE); ethanolamine (DE); more	P52907	1780.9	13
383	A(+42.01)D(+43.04)FD(+43.04)TYD(+43.04)D(+43.04)	-	M	ADFDTYDD	R	Acetylation (Protein N-term); ethanolamine (DE); ethanolamine (DE); ethanolamine (DE); ethanolamine (DE)	Q15056	1174.51	8
384	A(+42.01)D(+43.04)FD(+43.04)TYD(+43.04)DR	-	M	ADFDTYDDR	A	Acetylation (Protein N-term); ethanolamine (DE); ethanolamine (DE); ethanolamine (DE)	Q15056	1287.57	9
385	A(+42.01)D(+43.04)FD(+43.04)TYDD(+43.04)(+43.04)	-	M	ADFDTYDD	R	Acetylation (Protein N-term); ethanolamine (DE); ethanolamine (DE); ethanolamine (C-term); ethanolamine (DE)	Q15056	1174.51	8
386	A(+42.01)D(+43.04)FD(+43.04)TYDD(+43.04)R	-	M	ADFDTYDDR	A	Acetylation (Protein N-term); ethanolamine (DE); ethanolamine (DE); ethanolamine (DE)	Q15056	1287.57	9
387	A(+42.01)D(+43.04)FDD(+43.04)RVSD(+43.04)E(+43.04)E(+43.04)	-	M	ADFDDRVSDEE	K	Acetylation (Protein N-term); ethanolamine (DE); ethanolamine (DE); ethanolamine (DE); ethanolamine (DE); more	P52907	1553.73	11
388	A(+42.01)D(+43.04)GQM(+15.99)PFSC(+57.02)HYPS	-	M	ADGQMPFSCHYPS	R	Acetylation (Protein N-term); ethanolamine (DE); Oxidation (M); Carbamidomethylation	Q9UJY1	1596.63	13
389	A(+42.01)D(+43.04)GQMPFSC(+57.02)HYPS	-	M	ADGQMPFSCHYPS	R	Acetylation (Protein N-term); ethanolamine (DE); Carbamidomethylation	Q9UJY1	1580.64	13
390	A(+42.01)D(+43.04)GQVAE(+43.04)LLL	-	M	ADGQVAELLL	R	Acetylation (Protein N-term); ethanolamine (DE); ethanolamine (DE)	Q9Y285	1155.65	10
391	A(+42.01)D(+43.04)HNPD(+43.04)SD(+43.04)STP	-	M	ADHNPDSDSTP	R	Acetylation (Protein N-term); ethanolamine (DE); ethanolamine (DE); ethanolamine (DE)	Q96BT3	1325.58	11
392	A(+42.01)D(+43.04)HSFSD(+43.04)GVPSD(+43.04)	-	M	ADHSFSDGVPSD	S	Acetylation (Protein N-term); ethanolamine (DE); ethanolamine (DE); ethanolamine (DE)	Q99733	1403.63	12
393	A(+42.01)D(+43.04)HSFSD(+43.04)GVPSD(+43.04)SVE(+43.04)AA	-	M	ADHSFSDGVPSDSVEAA	K	Acetylation (Protein N-term); ethanolamine (DE); ethanolamine (DE); ethanolamine (DE); ethanolamine (DE)	Q99733	1903.89	17
394	A(+42.01)D(+43.04)HSFSD(+43.04)GVPSDSVE(+43.04)AA	-	M	ADHSFSDGVPSDSVEAA	K	Acetylation (Protein N-term); ethanolamine (DE); ethanolamine (DE); ethanolamine (DE)	Q99733	1860.85	17
395	A(+42.01)D(+43.04)HSFSDGVPSD(+43.04)	-	M	ADHSFSDGVPSD	S	Acetylation (Protein N-term); ethanolamine (DE); ethanolamine (DE)	Q99733	1360.59	12
396	A(+42.01)D(+43.04)HSFSDGVPSD(+43.04)SVE(+43.04)AA	-	M	ADHSFSDGVPSDSVEAA	K	Acetylation (Protein N-term); ethanolamine (DE); ethanolamine (DE); ethanolamine (DE)	Q99733	1860.85	17
397	A(+42.01)D(+43.04)HSFSDGVPSDSVE(+43.04)AA	-	M	ADHSFSDGVPSDSVEAA	K	Acetylation (Protein N-term); ethanolamine (DE); ethanolamine (DE)	Q99733	1817.81	17
398	A(+42.01)D(+43.04)HVQSLAQLE(+43.04)NLC(+57.02)	-	M	ADHVQSLAQLENLC	K	Acetylation (Protein N-term); ethanolamine (DE); ethanolamine (DE); Carbamidomethylation	Q9UIA9	1724.85	14
399	A(+42.01)D(+43.04)KPD(+43.04)M(+15.99)GE(+43.04)IASFD(+43.04)	-	M	ADKPDMGEIASFD	K	Acetylation (Protein N-term); ethanolamine (DE); ethanolamine (DE); Oxidation (M); ethanolamine (DE); more	P63313	1624.78	13
400	A(+42.01)D(+43.04)KPD(+43.04)M(+15.99)GE(+43.04)IASFDKA	-	M	ADKPDMGEIASFDKA	K	Acetylation (Protein N-term); ethanolamine (DE); ethanolamine (DE); Oxidation (M); ethanolamine (DE)	P63313	1780.87	15
401	A(+42.01)D(+43.04)KPD(+43.04)MGE(+43.04)IASFD(+43.04)	-	M	ADKPDMGEIASFD	K	Acetylation (Protein N-term); ethanolamine (DE); ethanolamine (DE); ethanolamine (DE); ethanolamine (DE)	P63313	1608.78	13
402	A(+42.01)D(+43.04)KPDMGE(+43.04)IASFD(+43.04)	-	M	ADKPDMGEIASFD	K	Acetylation (Protein N-term); ethanolamine (DE); ethanolamine (DE); ethanolamine (DE)	P63313	1565.74	13
403	A(+42.01)D(+43.04)LE(+43.04)E(+43.04)QLSD(+43.04)EE(+43.04)	-	M	ADLEEQLSDEE	K	Acetylation (Protein N-term); ethanolamine (DE); ethanolamine (DE); ethanolamine (DE); ethanolamine (DE); more	P47755	1533.75	11
404	A(+42.01)D(+43.04)LE(+43.04)E(+43.04)QLSD(+43.04)EE(+43.04)(+43.04)	-	M	ADLEEQLSDEE	K	Acetylation (Protein N-term); ethanolamine (DE); ethanolamine (DE); ethanolamine (DE); ethanolamine (DE); more	P47755	1576.79	11
405	A(+42.01)D(+43.04)LE(+43.04)E(+43.04)QLSDE(+43.04)E(+43.04)	-	M	ADLEEQLSDEE	K	Acetylation (Protein N-term); ethanolamine (DE); ethanolamine (DE); ethanolamine (DE); ethanolamine (DE); more	P47755	1533.75	11
406	A(+42.01)D(+43.04)LEE(+43.04)QLSD(+43.04)E(+43.04)E(+43.04)	-	M	ADLEEQLSDEE	K	Acetylation (Protein N-term); ethanolamine (DE); ethanolamine (DE); ethanolamine (DE); ethanolamine (DE); more	P47755	1533.75	11
407	A(+42.01)D(+43.04)LLGSILSSM(+15.99)E(+43.04)	-	M	ADLLGSILSSME	K	Acetylation (Protein N-term); ethanolamine (DE); Oxidation (M); ethanolamine (DE)	O75391	1378.7	12
408	A(+42.01)D(+43.04)LLGSILSSME(+43.04)	-	M	ADLLGSILSSME	K	Acetylation (Protein N-term); ethanolamine (DE); ethanolamine (DE)	O75391	1362.71	12
409	A(+42.01)D(+43.04)M(+15.99)QNLVE(+43.04)	-	M	ADMQNLVE	R	Acetylation (Protein N-term); ethanolamine (DE); Oxidation (M); ethanolamine (DE)	Q01518	1062.5	8
410	A(+42.01)D(+43.04)MQNLVE(+43.04)	-	M	ADMQNLVE	R	Acetylation (Protein N-term); ethanolamine (DE); ethanolamine (DE)	Q01518	1046.51	8
411	A(+42.01)D(+43.04)NFSLHD(+43.04)ALSGSGNPNPQ	-	M	ADNFSLHDALSGSGNPNPQ	G	Acetylation (Protein N-term); ethanolamine (DE); ethanolamine (DE)	P17931	2067.96	19
412	A(+42.01)D(+43.04)PD(+43.04)VLTE(+43.04)VPAAL	-	M	ADPDVLTEVPAAL	K	Acetylation (Protein N-term); ethanolamine (DE); ethanolamine (DE); ethanolamine (DE)	P29083	1480.81	13
413	A(+42.01)D(+43.04)PE(+43.04)VC(+57.02)C(+57.02)FIT	-	M	ADPEVCCFIT	K	Acetylation (Protein N-term); ethanolamine (DE); ethanolamine (DE); Carbamidomethylation; Carbamidomethylation	Q7Z2W4	1338.59	10
414	A(+42.01)D(+43.04)QLTE(+43.04)E(+43.04)QI	-，-，-	M，M，M	ADQLTEEQI	A，A，A	Acetylation (Protein N-term); ethanolamine (DE); ethanolamine (DE); ethanolamine (DE)	P0DP24，P0DP25，P0DP23	1216.63	9
415	A(+42.01)D(+43.04)QLTE(+43.04)E(+43.04)QIAE(+43.04)	-，-，-	M，M，M	ADQLTEEQIAE	F，F，F	Acetylation (Protein N-term); ethanolamine (DE); ethanolamine (DE); ethanolamine (DE); ethanolamine (DE)	P0DP24，P0DP25，P0DP23	1459.75	11
416	A(+42.01)D(+43.04)QLTE(+43.04)E(+43.04)QIAE(+43.04)F	-，-，-	M，M，M	ADQLTEEQIAEF	K，K，K	Acetylation (Protein N-term); ethanolamine (DE); ethanolamine (DE); ethanolamine (DE); ethanolamine (DE)	P0DP24，P0DP25，P0DP23	1606.82	12
417	A(+42.01)D(+43.04)QLTE(+43.04)E(+43.04)QIAE(+43.04)FKE(+43.04)A	-，-，-	M，M，M	ADQLTEEQIAEFKEA	F，F，F	Acetylation (Protein N-term); ethanolamine (DE); ethanolamine (DE); ethanolamine (DE); ethanolamine (DE); more	P0DP24，P0DP25，P0DP23	1978.04	15
418	A(+42.01)D(+43.04)QLTE(+43.04)E(+43.04)QIAEF(+43.04)	-，-，-	M，M，M	ADQLTEEQIAEF	K，K，K	Acetylation (Protein N-term); ethanolamine (DE); ethanolamine (DE); ethanolamine (DE); ethanolamine (C-term)	P0DP24，P0DP25，P0DP23	1606.82	12
419	A(+42.01)D(+43.04)QLTE(+43.04)EQIAE(+43.04)F	-，-，-	M，M，M	ADQLTEEQIAEF	K，K，K	Acetylation (Protein N-term); ethanolamine (DE); ethanolamine (DE); ethanolamine (DE)	P0DP24，P0DP25，P0DP23	1563.78	12
420	A(+42.01)D(+43.04)QLTEE(+43.04)QIAE(+43.04)F	-，-，-	M，M，M	ADQLTEEQIAEF	K，K，K	Acetylation (Protein N-term); ethanolamine (DE); ethanolamine (DE); ethanolamine (DE)	P0DP24，P0DP25，P0DP23	1563.78	12
421	A(+42.01)D(+43.04)QPKPISPL	-	M	ADQPKPISPL	K	Acetylation (Protein N-term); ethanolamine (DE)	O43772	1149.64	10
422	A(+42.01)D(+43.04)SASE(+43.04)SD(+43.04)TD(+43.04)GAGGN	-	M	ADSASESDTDGAGGN	S	Acetylation (Protein N-term); ethanolamine (DE); ethanolamine (DE); ethanolamine (DE); ethanolamine (DE)	Q16204	1566.68	15
423	A(+42.01)D(+43.04)SE(+43.04)LQLVE(+43.04)Q	-	M	ADSELQLVEQ	R	Acetylation (Protein N-term); ethanolamine (DE); ethanolamine (DE); ethanolamine (DE)	P07741	1301.68	10
424	A(+42.01)D(+43.04)SE(+43.04)LQLVEQ(+43.04)	-	M	ADSELQLVEQ	R	Acetylation (Protein N-term); ethanolamine (DE); ethanolamine (DE); ethanolamine (C-term)	P07741	1301.68	10
425	A(+42.01)D(+43.04)SELQLVEQ(+43.04)	-	M	ADSELQLVEQ	R	Acetylation (Protein N-term); ethanolamine (DE); ethanolamine (C-term)	P07741	1258.64	10
426	A(+42.01)D(+43.04)SGTAGGAAL	-	M	ADSGTAGGAAL	A	Acetylation (Protein N-term); ethanolamine (DE)	Q96C90	974.467	11
427	A(+42.01)D(+43.04)SGTAGGAALAAPAPGPGSGGPGP	-	M	ADSGTAGGAALAAPAPGPGSGGPGP	R	Acetylation (Protein N-term); ethanolamine (DE)	Q96C90	2044.98	25
428	A(+42.01)D(+43.04)TLE(+43.04)SSLE(+43.04)D(+43.04)PL	-	M	ADTLESSLEDPL	R	Acetylation (Protein N-term); ethanolamine (DE); ethanolamine (DE); ethanolamine (DE); ethanolamine (DE)	Q9H867	1502.78	12
429	A(+42.01)D(+43.04)TQYILPND(+43.04)IGVSSLDC(+57.02)(+43.04)	-	M	ADTQYILPNDIGVSSLDC	R	Acetylation (Protein N-term); ethanolamine (DE); ethanolamine (DE); Carbamidomethylation; ethanolamine (C-term)	Q9NY33	2151.05	18
430	A(+42.01)D(+43.04)VLD(+43.04)LHE(+43.04)AGGE(+43.04)D(+43.04)	-	M	ADVLDLHEAGGED	F	Acetylation (Protein N-term); ethanolamine (DE); ethanolamine (DE); ethanolamine (DE); ethanolamine (DE); more	Q9Y5S9	1596.81	13
431	A(+42.01)D(+43.04)VLD(+43.04)LHE(+43.04)AGGE(+43.04)D(+43.04)F	-	M	ADVLDLHEAGGEDF	A	Acetylation (Protein N-term); ethanolamine (DE); ethanolamine (DE); ethanolamine (DE); ethanolamine (DE); more	Q9Y5S9	1743.88	14
432	A(+42.01)D(+43.04)VLD(+43.04)LHE(+43.04)AGGE(+43.04)DF(+43.04)	-	M	ADVLDLHEAGGEDF	A	Acetylation (Protein N-term); ethanolamine (DE); ethanolamine (DE); ethanolamine (DE); ethanolamine (DE); more	Q9Y5S9	1743.88	14
433	A(+42.01)D(+43.04)VLD(+43.04)LHE(+43.04)AGGED(+43.04)(+43.04)	-	M	ADVLDLHEAGGED	F	Acetylation (Protein N-term); ethanolamine (DE); ethanolamine (DE); ethanolamine (DE); ethanolamine (C-term); more	Q9Y5S9	1596.81	13
434	A(+42.01)D(+43.04)YLISGGTSYVPD(+43.04)	-	M	ADYLISGGTSYVPD	D	Acetylation (Protein N-term); ethanolamine (DE); ethanolamine (DE)	P12268	1584.77	14
435	A(+42.01)DD(+43.04)AGAAGGPGGPGGPGMGN	-	M	ADDAGAAGGPGGPGGPGMGN	R	Acetylation (Protein N-term); ethanolamine (DE)	P15880	1666.7	20
436	A(+42.01)DD(+43.04)LD(+43.04)FE(+43.04)TGD(+43.04)AGASATFPMQC(+57.02)SAL	-，-	M，M	ADDLDFETGDAGASATFPMQCSAL	R，R	Acetylation (Protein N-term); ethanolamine (DE); ethanolamine (DE); ethanolamine (DE); ethanolamine (DE); more	P63241，Q6IS14	2703.22	24
437	A(+42.01)DGQMPFSC(+57.02)HYPS	-	M	ADGQMPFSCHYPS	R	Acetylation (Protein N-term); Carbamidomethylation	Q9UJY1	1537.6	13
438	A(+42.01)DGQVAE(+43.04)LLL	-	M	ADGQVAELLL	R	Acetylation (Protein N-term); ethanolamine (DE)	Q9Y285	1112.61	10
439	A(+42.01)DHSFSD(+43.04)GVPSD(+43.04)SVE(+43.04)AA	-	M	ADHSFSDGVPSDSVEAA	K	Acetylation (Protein N-term); ethanolamine (DE); ethanolamine (DE); ethanolamine (DE)	Q99733	1860.85	17
440	A(+42.01)DHSFSD(+43.04)GVPSDSVE(+43.04)AA	-	M	ADHSFSDGVPSDSVEAA	K	Acetylation (Protein N-term); ethanolamine (DE); ethanolamine (DE)	Q99733	1817.81	17
441	A(+42.01)DHSFSDGVPSD(+43.04)SVE(+43.04)AA	-	M	ADHSFSDGVPSDSVEAA	K	Acetylation (Protein N-term); ethanolamine (DE); ethanolamine (DE)	Q99733	1817.81	17
442	A(+42.01)DHVQSLAQLE(+43.04)NLC(+57.02)	-	M	ADHVQSLAQLENLC	K	Acetylation (Protein N-term); ethanolamine (DE); Carbamidomethylation	Q9UIA9	1681.81	14
443	A(+42.01)DKE(+43.04)AAFD(+43.04)D(+43.04)AVEE(+43.04)(+43.04)	-	M	ADKEAAFDDAVEE	R	Acetylation (Protein N-term); ethanolamine (DE); ethanolamine (DE); ethanolamine (DE); ethanolamine (C-term); more	Q09028	1665.82	13
444	A(+42.01)DLE(+43.04)E(+43.04)QLSD(+43.04)E(+43.04)E(+43.04)	-	M	ADLEEQLSDEE	K	Acetylation (Protein N-term); ethanolamine (DE); ethanolamine (DE); ethanolamine (DE); ethanolamine (DE); more	P47755	1533.75	11
445	A(+42.01)DNFSLHD(+43.04)ALSGSGN	-	M	ADNFSLHDALSGSGN	P	Acetylation (Protein N-term); ethanolamine (DE)	P17931	1588.71	15
446	A(+42.01)DQLTE(+43.04)E(+43.04)QIAE(+43.04)F	-，-，-	M，M，M	ADQLTEEQIAEF	K，K，K	Acetylation (Protein N-term); ethanolamine (DE); ethanolamine (DE); ethanolamine (DE)	P0DP24，P0DP25，P0DP23	1563.78	12
447	A(+42.01)DQLTE(+43.04)E(+43.04)QIAEF(+43.04)	-，-，-	M，M，M	ADQLTEEQIAEF	K，K，K	Acetylation (Protein N-term); ethanolamine (DE); ethanolamine (DE); ethanolamine (C-term)	P0DP24，P0DP25，P0DP23	1563.78	12
448	A(+42.01)DSE(+43.04)LQLVE(+43.04)Q	-	M	ADSELQLVEQ	R	Acetylation (Protein N-term); ethanolamine (DE); ethanolamine (DE)	P07741	1258.64	10
449	A(+42.01)E(+43.04)AALLLLPE(+43.04)AAAE(+43.04)	-	M	AEAALLLLPEAAAE	R	Acetylation (Protein N-term); ethanolamine (DE); ethanolamine (DE); ethanolamine (DE)	Q96JB2	1551.89	14
450	A(+42.01)E(+43.04)AASGAGGTSLE(+43.04)GE(+43.04)	-	M	AEAASGAGGTSLEGE	R	Acetylation (Protein N-term); ethanolamine (DE); ethanolamine (DE); ethanolamine (DE)	Q9HCE9	1476.71	15
451	A(+42.01)E(+43.04)AE(+43.04)GVPTTPGPASGSTF	-	M	AEAEGVPTTPGPASGSTF	R	Acetylation (Protein N-term); ethanolamine (DE); ethanolamine (DE)	Q86VR2	1802.87	18
452	A(+42.01)E(+43.04)AGAGLSE(+43.04)TVTE(+43.04)TTVTVTTE(+43.04)PE(+43.04)N	-	M	AEAGAGLSETVTETTVTVTTEPEN	R	Acetylation (Protein N-term); ethanolamine (DE); ethanolamine (DE); ethanolamine (DE); ethanolamine (DE); more	O60927	2663.35	24
453	A(+42.01)E(+43.04)AGAGLSE(+43.04)TVTETTVTVTTE(+43.04)PE(+43.04)N	-	M	AEAGAGLSETVTETTVTVTTEPEN	R	Acetylation (Protein N-term); ethanolamine (DE); ethanolamine (DE); ethanolamine (DE); ethanolamine (DE)	O60927	2620.31	24
454	A(+42.01)E(+43.04)APPVSGTF	-	M	AEAPPVSGTF	K	Acetylation (Protein N-term); ethanolamine (DE)	Q12986	1059.52	10
455	A(+42.01)E(+43.04)ASAAGAD(+43.04)SGAAVAAH	-	M	AEASAAGADSGAAVAAH	R	Acetylation (Protein N-term); ethanolamine (DE); ethanolamine (DE)	Q9Y4L5	1553.74	17
456	A(+42.01)E(+43.04)ASSANLGSGC(+57.02)E(+43.04)E(+43.04)	-	M	AEASSANLGSGCEE	K	Acetylation (Protein N-term); ethanolamine (DE); Carbamidomethylation; ethanolamine (DE); ethanolamine (DE)	Q6P1K2	1551.68	14
457	A(+42.01)E(+43.04)ASSANLGSGC(+57.02)E(+43.04)E(+43.04)K	-	M	AEASSANLGSGCEEK	R	Acetylation (Protein N-term); ethanolamine (DE); Carbamidomethylation; ethanolamine (DE); ethanolamine (DE)	Q6P1K2	1679.78	15
458	A(+42.01)E(+43.04)C(+57.02)GASGSGSSGD(+43.04)SLD(+43.04)	-	M	AECGASGSGSSGDSLD	K	Acetylation (Protein N-term); ethanolamine (DE); Carbamidomethylation; ethanolamine (DE); ethanolamine (DE)	Q9NVE7	1626.68	16
459	A(+42.01)E(+43.04)E(+43.04)E(+43.04)GPPVE(+43.04)L	-	M	AEEEGPPVEL	R	Acetylation (Protein N-term); ethanolamine (DE); ethanolamine (DE); ethanolamine (DE); ethanolamine (DE)	Q7Z388	1282.68	10
460	A(+42.01)E(+43.04)E(+43.04)GAVAVC(+57.02)V	-	M	AEEGAVAVCV	R	Acetylation (Protein N-term); ethanolamine (DE); ethanolamine (DE); Carbamidomethylation	Q02224	1131.56	10
461	A(+42.01)E(+43.04)E(+43.04)GIAAGGVM(+15.99)	-	M	AEEGIAAGGVM	D	Acetylation (Protein N-term); ethanolamine (DE); ethanolamine (DE); Oxidation (M)	P25398	1147.55	11
462	A(+42.01)E(+43.04)E(+43.04)GIAAGGVM(+15.99)D(+43.04)	-	M	AEEGIAAGGVMD	V	Acetylation (Protein N-term); ethanolamine (DE); ethanolamine (DE); Oxidation (M); ethanolamine (DE)	P25398	1305.62	12
463	A(+42.01)E(+43.04)E(+43.04)GIAAGGVM(+15.99)D(+43.04)VN	-	M	AEEGIAAGGVMDVN	T	Acetylation (Protein N-term); ethanolamine (DE); ethanolamine (DE); Oxidation (M); ethanolamine (DE)	P25398	1518.73	14
464	A(+42.01)E(+43.04)E(+43.04)GIAAGGVM(+15.99)D(+43.04)VNT	-	M	AEEGIAAGGVMDVNT	A	Acetylation (Protein N-term); ethanolamine (DE); ethanolamine (DE); Oxidation (M); ethanolamine (DE)	P25398	1619.78	15
465	A(+42.01)E(+43.04)E(+43.04)GIAAGGVM(+15.99)D(+43.04)VNTALQ	-	M	AEEGIAAGGVMDVNTALQ	E	Acetylation (Protein N-term); ethanolamine (DE); ethanolamine (DE); Oxidation (M); ethanolamine (DE)	P25398	1931.96	18
466	A(+42.01)E(+43.04)E(+43.04)GIAAGGVM(+15.99)D(+43.04)VNTALQE(+43.04)VL	-	M	AEEGIAAGGVMDVNTALQEVL	K	Acetylation (Protein N-term); ethanolamine (DE); ethanolamine (DE); Oxidation (M); ethanolamine (DE); more	P25398	2316.2	21
467	A(+42.01)E(+43.04)E(+43.04)GIAAGGVM(+15.99)DVNTALQE(+43.04)VL	-	M	AEEGIAAGGVMDVNTALQEVL	K	Acetylation (Protein N-term); ethanolamine (DE); ethanolamine (DE); Oxidation (M); ethanolamine (DE)	P25398	2273.16	21
468	A(+42.01)E(+43.04)E(+43.04)GIAAGGVMD(+43.04)	-	M	AEEGIAAGGVMD	V	Acetylation (Protein N-term); ethanolamine (DE); ethanolamine (DE); ethanolamine (DE)	P25398	1289.63	12
469	A(+42.01)E(+43.04)E(+43.04)GIAAGGVMD(+43.04)VN	-	M	AEEGIAAGGVMDVN	T	Acetylation (Protein N-term); ethanolamine (DE); ethanolamine (DE); ethanolamine (DE)	P25398	1502.74	14
470	A(+42.01)E(+43.04)E(+43.04)GIAAGGVMD(+43.04)VNT	-	M	AEEGIAAGGVMDVNT	A	Acetylation (Protein N-term); ethanolamine (DE); ethanolamine (DE); ethanolamine (DE)	P25398	1603.79	15
471	A(+42.01)E(+43.04)E(+43.04)GIAAGGVMD(+43.04)VNTALQE(+43.04)VL	-	M	AEEGIAAGGVMDVNTALQEVL	K	Acetylation (Protein N-term); ethanolamine (DE); ethanolamine (DE); ethanolamine (DE); ethanolamine (DE)	P25398	2300.2	21
472	A(+42.01)E(+43.04)E(+43.04)GIAAGGVMD(+43.04)VNTALQEVL(+43.04)	-	M	AEEGIAAGGVMDVNTALQEVL	K	Acetylation (Protein N-term); ethanolamine (DE); ethanolamine (DE); ethanolamine (DE); ethanolamine (C-term)	P25398	2300.2	21
473	A(+42.01)E(+43.04)E(+43.04)QPQVE(+43.04)LFV	-	M	AEEQPQVELFV	K	Acetylation (Protein N-term); ethanolamine (DE); ethanolamine (DE); ethanolamine (DE)	O00299	1458.77	11
474	A(+42.01)E(+43.04)E(+43.04)QPQVE(+43.04)LFVK	-	M	AEEQPQVELFVK	A	Acetylation (Protein N-term); ethanolamine (DE); ethanolamine (DE); ethanolamine (DE)	O00299	1586.87	12
475	A(+42.01)E(+43.04)EGIAAGGVM(+15.99)D(+43.04)VNTALQE(+43.04)VL	-	M	AEEGIAAGGVMDVNTALQEVL	K	Acetylation (Protein N-term); ethanolamine (DE); Oxidation (M); ethanolamine (DE); ethanolamine (DE)	P25398	2273.16	21
476	A(+42.01)E(+43.04)EQPQVE(+43.04)LFV	-	M	AEEQPQVELFV	K	Acetylation (Protein N-term); ethanolamine (DE); ethanolamine (DE)	O00299	1415.73	11
477	A(+42.01)E(+43.04)FLD(+43.04)D(+43.04)QE(+43.04)T	-	M	AEFLDDQET	R	Acetylation (Protein N-term); ethanolamine (DE); ethanolamine (DE); ethanolamine (DE); ethanolamine (DE)	O14545	1280.62	9
478	A(+42.01)E(+43.04)GGAAD(+43.04)LD(+43.04)TQ	-	M	AEGGAADLDTQ	R	Acetylation (Protein N-term); ethanolamine (DE); ethanolamine (DE); ethanolamine (DE)	Q9Y4E8	1217.59	11
479	A(+42.01)E(+43.04)GSAVSD(+43.04)PQHAA	-	M	AEGSAVSDPQHAA	R	Acetylation (Protein N-term); ethanolamine (DE); ethanolamine (DE)	Q9H2C0	1366.65	13
480	A(+42.01)E(+43.04)LC(+57.02)PLAE(+43.04)E(+43.04)L	-	M	AELCPLAEEL	S	Acetylation (Protein N-term); ethanolamine (DE); Carbamidomethylation; ethanolamine (DE); ethanolamine (DE)	Q14258	1314.69	10
481	A(+42.01)E(+43.04)LD(+43.04)IGQHC(+57.02)QVE(+43.04)HC(+57.02)	-	M	AELDIGQHCQVEHC	R	Acetylation (Protein N-term); ethanolamine (DE); ethanolamine (DE); Carbamidomethylation; ethanolamine (DE); more	Q8TCF1	1865.85	14
482	A(+42.01)E(+43.04)LD(+43.04)LM(+15.99)APGPLP	-	M	AELDLMAPGPLP	R	Acetylation (Protein N-term); ethanolamine (DE); ethanolamine (DE); Oxidation (M)	O95361	1366.72	12
483	A(+42.01)E(+43.04)LD(+43.04)LMAPGPLP	-	M	AELDLMAPGPLP	R	Acetylation (Protein N-term); ethanolamine (DE); ethanolamine (DE)	O95361	1350.72	12
484	A(+42.01)E(+43.04)LD(+43.04)QLPD(+43.04)E(+43.04)SSSA	-	M	AELDQLPDESSSA	K	Acetylation (Protein N-term); ethanolamine (DE); ethanolamine (DE); ethanolamine (DE); ethanolamine (DE)	Q5TKA1	1574.78	13
485	A(+42.01)E(+43.04)LGAGGD(+43.04)GH	-	M	AELGAGGDGH	R	Acetylation (Protein N-term); ethanolamine (DE); ethanolamine (DE)	Q14244	1010.48	10
486	A(+42.01)E(+43.04)LGAGGDGH	-	M	AELGAGGDGH	R	Acetylation (Protein N-term); ethanolamine (DE)	Q14244	967.436	10
487	A(+42.01)E(+43.04)LGAGGDGH(+43.04)	-	M	AELGAGGDGH	R	Acetylation (Protein N-term); ethanolamine (DE); ethanolamine (C-term)	Q14244	1010.48	10
488	A(+42.01)E(+43.04)LGE(+43.04)AD(+43.04)E(+43.04)AE(+43.04)LQ	-	M	AELGEADEAELQ	R	Acetylation (Protein N-term); ethanolamine (DE); ethanolamine (DE); ethanolamine (DE); ethanolamine (DE); more	Q9Y5J9	1530.79	12
489	A(+42.01)E(+43.04)LGE(+43.04)ADE(+43.04)AE(+43.04)LQ	-	M	AELGEADEAELQ	R	Acetylation (Protein N-term); ethanolamine (DE); ethanolamine (DE); ethanolamine (DE); ethanolamine (DE)	Q9Y5J9	1487.75	12
490	A(+42.01)E(+43.04)LGLNE(+43.04)HHQNE(+43.04)VINYM(+15.99)	-	M	AELGLNEHHQNEVINYM	R	Acetylation (Protein N-term); ethanolamine (DE); ethanolamine (DE); ethanolamine (DE); Oxidation (M)	Q9NQ48	2197.06	17
491	A(+42.01)E(+43.04)LNTHVNV	-	M	AELNTHVNV	K	Acetylation (Protein N-term); ethanolamine (DE)	Q9NUQ6	1080.56	9
492	A(+42.01)E(+43.04)LQE(+43.04)VQITE(+43.04)E(+43.04)	-	M	AELQEVQITEE	K	Acetylation (Protein N-term); ethanolamine (DE); ethanolamine (DE); ethanolamine (DE); ethanolamine (DE)	Q9UN36	1501.8	11
493	A(+42.01)E(+43.04)LQM(+15.99)LLE(+43.04)E(+43.04)E(+43.04)IPGG	-	M	AELQMLLEEEIPGG	R	Acetylation (Protein N-term); ethanolamine (DE); Oxidation (M); ethanolamine (DE); ethanolamine (DE); more	Q9NYB9	1757.92	14
494	A(+42.01)E(+43.04)LQM(+15.99)LLE(+43.04)E(+43.04)E(+43.04)IPSG	-	M	AELQMLLEEEIPSG	K	Acetylation (Protein N-term); ethanolamine (DE); Oxidation (M); ethanolamine (DE); ethanolamine (DE); more	Q8IZP0	1787.93	14
495	A(+42.01)E(+43.04)LQMLLE(+43.04)E(+43.04)E(+43.04)IPGG	-	M	AELQMLLEEEIPGG	R	Acetylation (Protein N-term); ethanolamine (DE); ethanolamine (DE); ethanolamine (DE); ethanolamine (DE)	Q9NYB9	1741.93	14
496	A(+42.01)E(+43.04)LQMLLE(+43.04)E(+43.04)E(+43.04)IPGGR	-	M	AELQMLLEEEIPGGR	R	Acetylation (Protein N-term); ethanolamine (DE); ethanolamine (DE); ethanolamine (DE); ethanolamine (DE)	Q9NYB9	1898.03	15
497	A(+42.01)E(+43.04)LQMLLE(+43.04)E(+43.04)E(+43.04)IPSG	-	M	AELQMLLEEEIPSG	K	Acetylation (Protein N-term); ethanolamine (DE); ethanolamine (DE); ethanolamine (DE); ethanolamine (DE)	Q8IZP0	1771.94	14
498	A(+42.01)E(+43.04)LQMLLE(+43.04)E(+43.04)E(+43.04)IPSGK	-	M	AELQMLLEEEIPSGK	R	Acetylation (Protein N-term); ethanolamine (DE); ethanolamine (DE); ethanolamine (DE); ethanolamine (DE)	Q8IZP0	1900.03	15
499	A(+42.01)E(+43.04)LQMLLEE(+43.04)(+43.04)	-，-	M，M	AELQMLLEE	E，E	Acetylation (Protein N-term); ethanolamine (DE); ethanolamine (C-term); ethanolamine (DE)	Q8IZP0，Q9NYB9	1245.66	9
500	A(+42.01)E(+43.04)LTALE(+43.04)SLIE(+43.04)	-	M	AELTALESLIE	M	Acetylation (Protein N-term); ethanolamine (DE); ethanolamine (DE); ethanolamine (DE)	Q04323	1358.77	11
501	A(+42.01)E(+43.04)LTALE(+43.04)SLIE(+43.04)M(+15.99)GFPR	-	M	AELTALESLIEMGFPR	G	Acetylation (Protein N-term); ethanolamine (DE); ethanolamine (DE); ethanolamine (DE); Oxidation (M)	Q04323	1963.04	16
502	A(+42.01)E(+43.04)LTALE(+43.04)SLIE(+43.04)M(+15.99)GFPRG	-	M	AELTALESLIEMGFPRG	R	Acetylation (Protein N-term); ethanolamine (DE); ethanolamine (DE); ethanolamine (DE); Oxidation (M)	Q04323	2020.07	17
503	A(+42.01)E(+43.04)LTALE(+43.04)SLIE(+43.04)MGFPR	-	M	AELTALESLIEMGFPR	G	Acetylation (Protein N-term); ethanolamine (DE); ethanolamine (DE); ethanolamine (DE)	Q04323	1947.05	16
504	A(+42.01)E(+43.04)LTALE(+43.04)SLIE(+43.04)MGFPRG	-	M	AELTALESLIEMGFPRG	R	Acetylation (Protein N-term); ethanolamine (DE); ethanolamine (DE); ethanolamine (DE)	Q04323	2004.07	17
505	A(+42.01)E(+43.04)LVQGQSAPVGM	-	M	AELVQGQSAPVGM	K	Acetylation (Protein N-term); ethanolamine (DE)	Q96I24	1370.69	13
506	A(+42.01)E(+43.04)LVQGQSAPVGM(+15.99)	-	M	AELVQGQSAPVGM	K	Acetylation (Protein N-term); ethanolamine (DE); Oxidation (M)	Q96I24	1386.68	13
507	A(+42.01)E(+43.04)M(+15.99)D(+43.04)PVAE(+43.04)FPQPPGAA	-	M	AEMDPVAEFPQPPGAA	R	Acetylation (Protein N-term); ethanolamine (DE); Oxidation (M); ethanolamine (DE); ethanolamine (DE)	Q9HAB8	1812.87	16
508	A(+42.01)E(+43.04)NHC(+57.02)E(+43.04)LLSPA	-	M	AENHCELLSPA	R	Acetylation (Protein N-term); ethanolamine (DE); Carbamidomethylation; ethanolamine (DE)	Q9NXV2	1367.65	11
509	A(+42.01)E(+43.04)NLLD(+43.04)GPPNP	-	M	AENLLDGPPNP	K	Acetylation (Protein N-term); ethanolamine (DE); ethanolamine (DE)	Q92793	1263.65	11
510	A(+42.01)E(+43.04)NLLD(+43.04)GPPNPK	-	M	AENLLDGPPNPK	R	Acetylation (Protein N-term); ethanolamine (DE); ethanolamine (DE)	Q92793	1391.74	12
511	A(+42.01)E(+43.04)NPSLE(+43.04)NH	-	M	AENPSLENH	R	Acetylation (Protein N-term); ethanolamine (DE); ethanolamine (DE)	O00505	1137.54	9
512	A(+42.01)E(+43.04)NSE(+43.04)SLGTVPE(+43.04)HE(+43.04)	-	M	AENSESLGTVPEHE	R	Acetylation (Protein N-term); ethanolamine (DE); ethanolamine (DE); ethanolamine (DE); ethanolamine (DE)	Q8TAG9	1711.84	14
513	A(+42.01)E(+43.04)NVVE(+43.04)PGPPSA	-	M	AENVVEPGPPSA	K	Acetylation (Protein N-term); ethanolamine (DE); ethanolamine (DE)	Q09472	1293.66	12
514	A(+42.01)E(+43.04)PASVAAE(+43.04)SLAGS	-	M	AEPASVAAESLAGS	R	Acetylation (Protein N-term); ethanolamine (DE); ethanolamine (DE)	Q9NQT5	1386.7	14
515	A(+42.01)E(+43.04)PASVAAESLAGS	-	M	AEPASVAAESLAGS	R	Acetylation (Protein N-term); ethanolamine (DE)	Q9NQT5	1343.66	14
516	A(+42.01)E(+43.04)PD(+43.04)PSHPLE(+43.04)TQAG	-	M	AEPDPSHPLETQAG	K	Acetylation (Protein N-term); ethanolamine (DE); ethanolamine (DE); ethanolamine (DE)	Q8IXJ6	1618.8	14
517	A(+42.01)E(+43.04)PD(+43.04)YIE(+43.04)DD(+43.04)NPE(+43.04)LIRPQ	-	M	AEPDYIEDDNPELIRPQ	K	Acetylation (Protein N-term); ethanolamine (DE); ethanolamine (DE); ethanolamine (DE); ethanolamine (DE); more	Q9H098	2270.15	17
518	A(+42.01)E(+43.04)PFLSE(+43.04)YQHQPQTSN	-	M	AEPFLSEYQHQPQTSN	C	Acetylation (Protein N-term); ethanolamine (DE); ethanolamine (DE)	O94992	2002.94	16
519	A(+42.01)E(+43.04)PFLSE(+43.04)YQHQPQTSNC(+57.02)TGAAAVQ	-	M	AEPFLSEYQHQPQTSNCTGAAAVQ	E	Acetylation (Protein N-term); ethanolamine (DE); ethanolamine (DE); Carbamidomethylation	O94992	2761.28	24
520	A(+42.01)E(+43.04)PFLSE(+43.04)YQHQPQTSNC(+57.02)TGAAAVQE(+43.04)E(+43.04)LNPE(+43.04)	-	M	AEPFLSEYQHQPQTSNCTGAAAVQEELNPE	R	Acetylation (Protein N-term); ethanolamine (DE); ethanolamine (DE); Carbamidomethylation; ethanolamine (DE); more	O94992	3601.71	30
521	A(+42.01)E(+43.04)PPSPVHC(+57.02)VAAAAPTATVSE(+43.04)	-	M	AEPPSPVHCVAAAAPTATVSE	K	Acetylation (Protein N-term); ethanolamine (DE); Carbamidomethylation; ethanolamine (DE)	Q6PCB5	2189.08	21
522	A(+42.01)E(+43.04)PQAE(+43.04)SE(+43.04)PLLGGA	-	M	AEPQAESEPLLGGA	R	Acetylation (Protein N-term); ethanolamine (DE); ethanolamine (DE); ethanolamine (DE)	Q8NHX9	1538.79	14
523	A(+42.01)E(+43.04)PQPPSGGLTD(+43.04)E(+43.04)A	-	M	AEPQPPSGGLTDEA	A	Acetylation (Protein N-term); ethanolamine (DE); ethanolamine (DE); ethanolamine (DE)	Q04760	1538.76	14
524	A(+42.01)E(+43.04)PQPPSGGLTD(+43.04)E(+43.04)AAL	-	M	AEPQPPSGGLTDEAAL	S	Acetylation (Protein N-term); ethanolamine (DE); ethanolamine (DE); ethanolamine (DE)	Q04760	1722.88	16
525	A(+42.01)E(+43.04)PQPPSGGLTD(+43.04)E(+43.04)AALSC(+57.02)C(+57.02)	-	M	AEPQPPSGGLTDEAALSCC	S	Acetylation (Protein N-term); ethanolamine (DE); ethanolamine (DE); ethanolamine (DE); Carbamidomethylation; more	Q04760	2129.97	19
526	A(+42.01)E(+43.04)PQPPSGGLTD(+43.04)E(+43.04)AALSC(+57.02)C(+57.02)SD(+43.04)	-	M	AEPQPPSGGLTDEAALSCCSD	A	Acetylation (Protein N-term); ethanolamine (DE); ethanolamine (DE); ethanolamine (DE); Carbamidomethylation; more	Q04760	2375.07	21
527	A(+42.01)E(+43.04)PQPPSGGLTD(+43.04)E(+43.04)AALSC(+57.02)C(+57.02)SD(+43.04)AD(+43.04)PST	-	M	AEPQPPSGGLTDEAALSCCSDADPST	K	Acetylation (Protein N-term); ethanolamine (DE); ethanolamine (DE); ethanolamine (DE); Carbamidomethylation; more	Q04760	2889.31	26
528	A(+42.01)E(+43.04)PSAATQSHSIS	-	M	AEPSAATQSHSIS	S	Acetylation (Protein N-term); ethanolamine (DE)	O95197	1369.65	13
529	A(+42.01)E(+43.04)PSAATQSHSISS	-	M	AEPSAATQSHSISS	S	Acetylation (Protein N-term); ethanolamine (DE)	O95197	1456.68	14
530	A(+42.01)E(+43.04)PSAATQSHSISSS	-	M	AEPSAATQSHSISSS	S	Acetylation (Protein N-term); ethanolamine (DE)	O95197	1543.71	15
531	A(+42.01)E(+43.04)PSAATQSHSISSSS	-	M	AEPSAATQSHSISSSS	F	Acetylation (Protein N-term); ethanolamine (DE)	O95197	1630.74	16
532	A(+42.01)E(+43.04)PSAATQSHSISSSSF	-	M	AEPSAATQSHSISSSSF	G	Acetylation (Protein N-term); ethanolamine (DE)	O95197	1777.81	17
533	A(+42.01)E(+43.04)PSAATQSHSISSSSFG	-	M	AEPSAATQSHSISSSSFG	A	Acetylation (Protein N-term); ethanolamine (DE)	O95197	1834.83	18
534	A(+42.01)E(+43.04)PSAATQSHSISSSSFGA	-	M	AEPSAATQSHSISSSSFGA	E	Acetylation (Protein N-term); ethanolamine (DE)	O95197	1905.87	19
535	A(+42.01)E(+43.04)PSAATQSHSISSSSFGAE(+43.04)PSAPGGGGSPGAC(+57.02)PALGT	-	M	AEPSAATQSHSISSSSFGAEPSAPGGGGSPGACPALGT	K	Acetylation (Protein N-term); ethanolamine (DE); ethanolamine (DE); Carbamidomethylation	O95197	3569.63	38
536	A(+42.01)E(+43.04)PSAATQSHSISSSSFGAE(+43.04)PSAPGGGGSPGAC(+57.02)PALGTK	-	M	AEPSAATQSHSISSSSFGAEPSAPGGGGSPGACPALGTK	S	Acetylation (Protein N-term); ethanolamine (DE); ethanolamine (DE); Carbamidomethylation	O95197	3697.73	39
537	A(+42.01)E(+43.04)PTVC(+57.02)SFLT	-	M	AEPTVCSFLT	K	Acetylation (Protein N-term); ethanolamine (DE); Carbamidomethylation	Q96H79	1208.57	10
538	A(+42.01)E(+43.04)PWGNE(+43.04)LASAAA	-	M	AEPWGNELASAAA	R	Acetylation (Protein N-term); ethanolamine (DE); ethanolamine (DE)	P42773	1413.69	13
539	A(+42.01)E(+43.04)QD(+43.04)VE(+43.04)ND(+43.04)LLD(+43.04)	-	M	AEQDVENDLLD	Y	Acetylation (Protein N-term); ethanolamine (DE); ethanolamine (DE); ethanolamine (DE); ethanolamine (DE); more	O00148	1516.77	11
540	A(+42.01)E(+43.04)QD(+43.04)VE(+43.04)ND(+43.04)LLDYD(+43.04)(+43.04)	-	M	AEQDVENDLLDYD	E	Acetylation (Protein N-term); ethanolamine (DE); ethanolamine (DE); ethanolamine (DE); ethanolamine (DE); more	O00148	1837.91	13
541	A(+42.01)E(+43.04)QE(+43.04)PTAE(+43.04)QL	-	M	AEQEPTAEQL	A	Acetylation (Protein N-term); ethanolamine (DE); ethanolamine (DE); ethanolamine (DE)	P52565	1285.65	10
542	A(+42.01)E(+43.04)QE(+43.04)PTAE(+43.04)QLAQIAAE(+43.04)	-	M	AEQEPTAEQLAQIAAE	N	Acetylation (Protein N-term); ethanolamine (DE); ethanolamine (DE); ethanolamine (DE); ethanolamine (DE)	P52565	1911.99	16
543	A(+42.01)E(+43.04)QE(+43.04)PTAE(+43.04)QLAQIAAE(+43.04)N	-	M	AEQEPTAEQLAQIAAEN	E	Acetylation (Protein N-term); ethanolamine (DE); ethanolamine (DE); ethanolamine (DE); ethanolamine (DE)	P52565	2026.03	17
544	A(+42.01)E(+43.04)QE(+43.04)PTAE(+43.04)QLAQIAAE(+43.04)NE(+43.04)	-	M	AEQEPTAEQLAQIAAENE	E	Acetylation (Protein N-term); ethanolamine (DE); ethanolamine (DE); ethanolamine (DE); ethanolamine (DE); more	P52565	2198.12	18
545	A(+42.01)E(+43.04)QE(+43.04)PTAE(+43.04)QLAQIAAE(+43.04)NEED(+43.04)(+43.04)	-	M	AEQEPTAEQLAQIAAENEED	E	Acetylation (Protein N-term); ethanolamine (DE); ethanolamine (DE); ethanolamine (DE); ethanolamine (DE); more	P52565	2485.23	20
546	A(+42.01)E(+43.04)QE(+43.04)PTAE(+43.04)QLAQIAAEN(+43.04)	-	M	AEQEPTAEQLAQIAAEN	E	Acetylation (Protein N-term); ethanolamine (DE); ethanolamine (DE); ethanolamine (DE); ethanolamine (C-term)	P52565	2026.03	17
547	A(+42.01)E(+43.04)QE(+43.04)PTAE(+43.04)QLAQIAAENE(+43.04)(+43.04)	-	M	AEQEPTAEQLAQIAAENE	E	Acetylation (Protein N-term); ethanolamine (DE); ethanolamine (DE); ethanolamine (DE); ethanolamine (C-term); more	P52565	2198.12	18
548	A(+42.01)E(+43.04)QVALS	-	M	AEQVALS	R	Acetylation (Protein N-term); ethanolamine (DE)	P11413	801.423	7
549	A(+42.01)E(+43.04)QVLPQALYLSNM	-	M	AEQVLPQALYLSNM	R	Acetylation (Protein N-term); ethanolamine (DE)	P21580	1660.85	14
550	A(+42.01)E(+43.04)QVLPQALYLSNM(+15.99)	-	M	AEQVLPQALYLSNM	R	Acetylation (Protein N-term); ethanolamine (DE); Oxidation (M)	P21580	1676.84	14
551	A(+42.01)E(+43.04)RPE(+43.04)D(+43.04)LNLPNAVIT	-	M	AERPEDLNLPNAVIT	R	Acetylation (Protein N-term); ethanolamine (DE); ethanolamine (DE); ethanolamine (DE)	Q9NRF9	1821.99	15
552	A(+42.01)E(+43.04)RPE(+43.04)DLNLPNAVIT	-	M	AERPEDLNLPNAVIT	R	Acetylation (Protein N-term); ethanolamine (DE); ethanolamine (DE)	Q9NRF9	1778.95	15
553	A(+42.01)E(+43.04)SD(+43.04)WD(+43.04)TVTVL	-	M	AESDWDTVTVL	R	Acetylation (Protein N-term); ethanolamine (DE); ethanolamine (DE); ethanolamine (DE)	O60869	1405.71	11
554	A(+42.01)E(+43.04)SGE(+43.04)SGGPPGSQD(+43.04)	-	M	AESGESGGPPGSQD	S	Acetylation (Protein N-term); ethanolamine (DE); ethanolamine (DE); ethanolamine (DE)	Q9UMX0	1444.64	14
555	A(+42.01)E(+43.04)SGE(+43.04)SGGPPGSQD(+43.04)SAAGAE(+43.04)GAGAPAAAASAE(+43.04)P	-	M	AESGESGGPPGSQDSAAGAEGAGAPAAAASAEP	K	Acetylation (Protein N-term); ethanolamine (DE); ethanolamine (DE); ethanolamine (DE); ethanolamine (DE); more	Q9UMX0	3038.42	33
556	A(+42.01)E(+43.04)SGE(+43.04)SGGPPGSQD(+43.04)SAAGAE(+43.04)GAGAPAAAASAE(+43.04)PK	-	M	AESGESGGPPGSQDSAAGAEGAGAPAAAASAEPK	I	Acetylation (Protein N-term); ethanolamine (DE); ethanolamine (DE); ethanolamine (DE); ethanolamine (DE); more	Q9UMX0	3166.51	34
557	A(+42.01)E(+43.04)SGE(+43.04)SGGPPGSQD(+43.04)SAAGAE(+43.04)GAGAPAAAASAEP(+43.04)	-	M	AESGESGGPPGSQDSAAGAEGAGAPAAAASAEP	K	Acetylation (Protein N-term); ethanolamine (DE); ethanolamine (DE); ethanolamine (DE); ethanolamine (DE); more	Q9UMX0	3038.42	33
558	A(+42.01)E(+43.04)SGE(+43.04)SGGPPGSQDSAAGAE(+43.04)GAGAPAAAASAE(+43.04)P	-	M	AESGESGGPPGSQDSAAGAEGAGAPAAAASAEP	K	Acetylation (Protein N-term); ethanolamine (DE); ethanolamine (DE); ethanolamine (DE); ethanolamine (DE)	Q9UMX0	2995.38	33
559	A(+42.01)E(+43.04)SSE(+43.04)SFTM(+15.99)ASSPAQ	-	M	AESSESFTMASSPAQ	R	Acetylation (Protein N-term); ethanolamine (DE); ethanolamine (DE); Oxidation (M)	P49736	1672.72	15
560	A(+42.01)E(+43.04)SSE(+43.04)SFTMASSPAQ	-	M	AESSESFTMASSPAQ	R	Acetylation (Protein N-term); ethanolamine (DE); ethanolamine (DE)	P49736	1656.73	15
561	A(+42.01)E(+43.04)SSSE(+43.04)SD(+43.04)HF	-	M	AESSSESDHF	R	Acetylation (Protein N-term); ethanolamine (DE); ethanolamine (DE); ethanolamine (DE)	Q6ZU80	1265.55	10
562	A(+42.01)E(+43.04)TLE(+43.04)FND(+43.04)VYQE(+43.04)V	-	M	AETLEFNDVYQEV	K	Acetylation (Protein N-term); ethanolamine (DE); ethanolamine (DE); ethanolamine (DE); ethanolamine (DE)	Q08945	1769.88	13
563	A(+42.01)E(+43.04)TLE(+43.04)FND(+43.04)VYQEVK	-	M	AETLEFNDVYQEVK	G	Acetylation (Protein N-term); ethanolamine (DE); ethanolamine (DE); ethanolamine (DE)	Q08945	1854.94	14
564	A(+42.01)E(+43.04)TLPGSGD(+43.04)SGPGTASLGPGVAE(+43.04)TGTR	-	M	AETLPGSGDSGPGTASLGPGVAETGTR	R	Acetylation (Protein N-term); ethanolamine (DE); ethanolamine (DE); ethanolamine (DE)	Q14151	2612.3	27
565	A(+42.01)E(+43.04)TLPGSGD(+43.04)SGPGTASLGPGVAETGT(+43.04)	-	M	AETLPGSGDSGPGTASLGPGVAETGT	R	Acetylation (Protein N-term); ethanolamine (DE); ethanolamine (DE); ethanolamine (C-term)	Q14151	2456.2	26
566	A(+42.01)E(+43.04)TLSGLGD(+43.04)SGAAGAA	-	M	AETLSGLGDSGAAGAA	A	Acetylation (Protein N-term); ethanolamine (DE); ethanolamine (DE)	Q15424	1474.73	16
567	A(+42.01)E(+43.04)TLSGLGD(+43.04)SGAAGAAALS	-	M	AETLSGLGDSGAAGAAALS	S	Acetylation (Protein N-term); ethanolamine (DE); ethanolamine (DE)	Q15424	1745.88	19
568	A(+42.01)E(+43.04)TLSGLGD(+43.04)SGAAGAAALSSASSE(+43.04)TGT	-	M	AETLSGLGDSGAAGAAALSSASSETGT	R	Acetylation (Protein N-term); ethanolamine (DE); ethanolamine (DE); ethanolamine (DE)	Q15424	2509.21	27
569	A(+42.01)E(+43.04)TLSGLGD(+43.04)SGAAGAAALSSASSE(+43.04)TGTR	-	M	AETLSGLGDSGAAGAAALSSASSETGTR	R	Acetylation (Protein N-term); ethanolamine (DE); ethanolamine (DE); ethanolamine (DE)	Q15424	2665.32	28
570	A(+42.01)E(+43.04)TLSGLGD(+43.04)SGAAGAAALSSASSETGT(+43.04)	-	M	AETLSGLGDSGAAGAAALSSASSETGT	R	Acetylation (Protein N-term); ethanolamine (DE); ethanolamine (DE); ethanolamine (C-term)	Q15424	2509.21	27
571	A(+42.01)E(+43.04)TLSGLGD(+43.04)SGAAGAAALSSASSETGTR(+43.04)	-	M	AETLSGLGDSGAAGAAALSSASSETGTR	R	Acetylation (Protein N-term); ethanolamine (DE); ethanolamine (DE); ethanolamine (C-term)	Q15424	2665.32	28
572	A(+42.01)E(+43.04)TLSGLGDSGAAGAAALSSASSE(+43.04)TGTR	-	M	AETLSGLGDSGAAGAAALSSASSETGTR	R	Acetylation (Protein N-term); ethanolamine (DE); ethanolamine (DE)	Q15424	2622.27	28
573	A(+42.01)E(+43.04)TSE(+43.04)E(+43.04)VAVLVQ	-	M	AETSEEVAVLVQ	R	Acetylation (Protein N-term); ethanolamine (DE); ethanolamine (DE); ethanolamine (DE)	Q7Z6K3	1444.78	12
574	A(+42.01)E(+43.04)TVAD(+43.04)TR	-	M	AETVADTR	R	Acetylation (Protein N-term); ethanolamine (DE); ethanolamine (DE)	O60493	989.514	8
575	A(+42.01)E(+43.04)VGE(+43.04)D(+43.04)SGA	-	M	AEVGEDSGA	R	Acetylation (Protein N-term); ethanolamine (DE); ethanolamine (DE); ethanolamine (DE)	P85037	1004.48	9
576	A(+42.01)E(+43.04)VGE(+43.04)IIE(+43.04)GC(+57.02)	-	M	AEVGEIIEGC	R	Acetylation (Protein N-term); ethanolamine (DE); ethanolamine (DE); ethanolamine (DE); Carbamidomethylation	Q92993	1246.62	10
577	A(+42.01)E(+43.04)VPPGPSSLLPPPAPPAPAAVE(+43.04)P	-	M	AEVPPGPSSLLPPPAPPAPAAVEP	R	Acetylation (Protein N-term); ethanolamine (DE); ethanolamine (DE)	Q147X3	2385.29	24
578	A(+42.01)E(+43.04)VQVLVLD(+43.04)	-	M	AEVQVLVLD	G	Acetylation (Protein N-term); ethanolamine (DE); ethanolamine (DE)	P40429	1112.64	9
579	A(+42.01)E(+43.04)VQVLVLD(+43.04)G	-	M	AEVQVLVLDG	R	Acetylation (Protein N-term); ethanolamine (DE); ethanolamine (DE)	P40429	1169.67	10
580	A(+42.01)E(+43.04)VQVLVLD(+43.04)GR	-	M	AEVQVLVLDGR	G	Acetylation (Protein N-term); ethanolamine (DE); ethanolamine (DE)	P40429	1325.77	11
581	A(+42.01)E(+43.04)VQVLVLDG	-	M	AEVQVLVLDG	R	Acetylation (Protein N-term); ethanolamine (DE)	P40429	1126.62	10
582	A(+42.01)E(+43.04)VQVLVLDGR	-	M	AEVQVLVLDGR	G	Acetylation (Protein N-term); ethanolamine (DE)	P40429	1282.72	11
583	A(+42.01)E(+43.04)VQVLVLDGRGHLLG	-	M	AEVQVLVLDGRGHLLG	R	Acetylation (Protein N-term); ethanolamine (DE)	P40429	1759.99	16
584	A(+42.01)E(+43.04)YLASIFGTE(+43.04)	-，-，-	M，M，M	AEYLASIFGTE	K，K，K	Acetylation (Protein N-term); ethanolamine (DE); ethanolamine (DE)	Q01081，P0DN76，Q8WU68	1327.67	11
585	A(+42.01)E(+43.04)YLASIFGTE(+43.04)K	-，-，-	M，M，M	AEYLASIFGTEK	D，D，D	Acetylation (Protein N-term); ethanolamine (DE); ethanolamine (DE)	Q01081，P0DN76，Q8WU68	1455.76	12
586	A(+42.01)ELVQGQSAPVGM	-	M	AELVQGQSAPVGM	K	Acetylation (Protein N-term)	Q96I24	1327.64	13
587	A(+42.01)ETLSGLGD(+43.04)SGAAGAAALSSASSE(+43.04)TGTR	-	M	AETLSGLGDSGAAGAAALSSASSETGTR	R	Acetylation (Protein N-term); ethanolamine (DE); ethanolamine (DE)	Q15424	2622.27	28
588	A(+42.01)FLASGPYLTHQQ	-	M	AFLASGPYLTHQQ	K	Acetylation (Protein N-term)	Q9Y6M9	1473.73	13
589	A(+42.01)FLD(+43.04)NPTIILAHI	-	M	AFLDNPTIILAHI	R	Acetylation (Protein N-term); ethanolamine (DE)	Q9BPZ7	1521.86	13
590	A(+42.01)FVATQGATVVD(+43.04)QTTLM	-	M	AFVATQGATVVDQTTLM	K	Acetylation (Protein N-term); ethanolamine (DE)	Q9Y4A5	1836.93	17
591	A(+42.01)FVATQGATVVD(+43.04)QTTLM(+15.99)	-	M	AFVATQGATVVDQTTLM	K	Acetylation (Protein N-term); ethanolamine (DE); Oxidation (M)	Q9Y4A5	1852.92	17
592	A(+42.01)GAATQASLE(+43.04)SAP	-	M	AGAATQASLESAP	R	Acetylation (Protein N-term); ethanolamine (DE)	Q9BXR0	1257.62	13
593	A(+42.01)GAGGGND(+43.04)IQWC(+57.02)FSQV	-	M	AGAGGGNDIQWCFSQV	K	Acetylation (Protein N-term); ethanolamine (DE); Carbamidomethylation	P63151	1750.77	16
594	A(+42.01)GAGPAPGLPGAGGPVVPGPGAGIPG	-	M	AGAGPAPGLPGAGGPVVPGPGAGIPG	K	Acetylation (Protein N-term)	Q9BTD8	2089.1	26
595	A(+42.01)GAGPAPGLPGAGGPVVPGPGAGIPGK	-	M	AGAGPAPGLPGAGGPVVPGPGAGIPGK	S	Acetylation (Protein N-term)	Q9BTD8	2217.19	27
596	A(+42.01)GAGSAAVSGAGTPVAGPTG	-	M	AGAGSAAVSGAGTPVAGPTG	R	Acetylation (Protein N-term)	O95295	1596.77	20
597	A(+42.01)GAPTVSLPE(+43.04)L	-	M	AGAPTVSLPEL	R	Acetylation (Protein N-term); ethanolamine (DE)	Q8NFU3	1138.62	11
598	A(+42.01)GAQPGVHALQL	-，-	M，M	AGAQPGVHALQL	K，E	Acetylation (Protein N-term)	Q9NQ66，Q01970	1202.64	12
599	A(+42.01)GAQPGVHALQLE(+43.04)PPTVVE(+43.04)TL	-	M	AGAQPGVHALQLEPPTVVETL	R	Acetylation (Protein N-term); ethanolamine (DE); ethanolamine (DE)	Q01970	2254.23	21
600	A(+42.01)GASE(+43.04)LGTGPGAAGGD(+43.04)	-	M	AGASELGTGPGAAGGD	G	Acetylation (Protein N-term); ethanolamine (DE); ethanolamine (DE)	P30154	1414.67	16
601	A(+42.01)GD(+43.04)LSAGFFM(+15.99)E(+43.04)E(+43.04)LNTY	-	M	AGDLSAGFFMEELNTY	R	Acetylation (Protein N-term); ethanolamine (DE); Oxidation (M); ethanolamine (DE); ethanolamine (DE)	P19525	1950.9	16
602	A(+42.01)GGE(+43.04)AGVTLGQPHLS	-，-	M，M	AGGEAGVTLGQPHLS	R，R	Acetylation (Protein N-term); ethanolamine (DE)	P41091，Q2VIR3	1477.75	15
603	A(+42.01)GGEAGVTLGQPHLS	-，-	M，M	AGGEAGVTLGQPHLS	R，R	Acetylation (Protein N-term)	P41091，Q2VIR3	1434.71	15
604	A(+42.01)GGGAGD(+43.04)PGLGAAAAPAPE(+43.04)T	-	M	AGGGAGDPGLGAAAAPAPET	R	Acetylation (Protein N-term); ethanolamine (DE); ethanolamine (DE)	Q13637	1734.85	20
605	A(+42.01)GGGAGD(+43.04)PGLGAAAAPAPET(+43.04)	-	M	AGGGAGDPGLGAAAAPAPET	R	Acetylation (Protein N-term); ethanolamine (DE); ethanolamine (C-term)	Q13637	1734.85	20
606	A(+42.01)GGGGD(+43.04)LSTR	-	M	AGGGGDLSTR	R	Acetylation (Protein N-term); ethanolamine (DE)	P23497	974.478	10
607	A(+42.01)GGPGPGE(+43.04)PAAPGAQH	-	M	AGGPGPGEPAAPGAQH	F	Acetylation (Protein N-term); ethanolamine (DE)	P51617	1454.69	16
608	A(+42.01)GGVD(+43.04)GPIGIPFPD(+43.04)HSSD(+43.04)ILSGLNE(+43.04)Q	-	M	AGGVDGPIGIPFPDHSSDILSGLNEQ	R	Acetylation (Protein N-term); ethanolamine (DE); ethanolamine (DE); ethanolamine (DE); ethanolamine (DE)	O95365	2805.43	26
609	A(+42.01)GILFE(+43.04)D(+43.04)IFD(+43.04)V	-	M	AGILFEDIFDV	K	Acetylation (Protein N-term); ethanolamine (DE); ethanolamine (DE); ethanolamine (DE)	P52434	1408.76	11
610	A(+42.01)GLE(+43.04)LLSD(+43.04)QGY	-	M	AGLELLSDQGY	R	Acetylation (Protein N-term); ethanolamine (DE); ethanolamine (DE)	Q9NPD3	1292.66	11
611	A(+42.01)GLELLSD(+43.04)QGY	-	M	AGLELLSDQGY	R	Acetylation (Protein N-term); ethanolamine (DE)	Q9NPD3	1249.62	11
612	A(+42.01)GLGHPAAFG	-	M	AGLGHPAAFG	R	Acetylation (Protein N-term)	O94760	938.461	10
613	A(+42.01)GLNSLE(+43.04)AV	-	M	AGLNSLEAV	K	Acetylation (Protein N-term); ethanolamine (DE)	P67936	957.513	9
614	A(+42.01)GLNSLE(+43.04)AVK	-	M	AGLNSLEAVK	R	Acetylation (Protein N-term); ethanolamine (DE)	P67936	1085.61	10
615	A(+42.01)GM(+15.99)VD(+43.04)FQD(+43.04)E(+43.04)E(+43.04)QV	-	M	AGMVDFQDEEQV	K	Acetylation (Protein N-term); Oxidation (M); ethanolamine (DE); ethanolamine (DE); ethanolamine (DE); more	Q96BR5	1596.75	12
616	A(+42.01)GMVD(+43.04)FQD(+43.04)E(+43.04)E(+43.04)QV	-	M	AGMVDFQDEEQV	K	Acetylation (Protein N-term); ethanolamine (DE); ethanolamine (DE); ethanolamine (DE); ethanolamine (DE)	Q96BR5	1580.75	12
617	A(+42.01)GMVDFQD(+43.04)E(+43.04)E(+43.04)QV	-	M	AGMVDFQDEEQV	K	Acetylation (Protein N-term); ethanolamine (DE); ethanolamine (DE); ethanolamine (DE)	Q96BR5	1537.71	12
618	A(+42.01)GNFD(+43.04)SE(+43.04)E(+43.04)	-	M	AGNFDSEE	R	Acetylation (Protein N-term); ethanolamine (DE); ethanolamine (DE); ethanolamine (DE)	P46108	1038.46	8
619	A(+42.01)GPGPGAVLE(+43.04)SP	-	M	AGPGPGAVLESP	R	Acetylation (Protein N-term); ethanolamine (DE)	Q5T447	1135.59	12
620	A(+42.01)GPGSTGGQIGAAALAGGA	-	M	AGPGSTGGQIGAAALAGGA	R	Acetylation (Protein N-term)	Q8N653	1524.75	19
621	A(+42.01)GQHLPVP	-	M	AGQHLPVP	R	Acetylation (Protein N-term)	A2RUC4	859.455	8
622	A(+42.01)GSPE(+43.04)LVVLD(+43.04)PPWD(+43.04)	-	M	AGSPELVVLDPPWD	K	Acetylation (Protein N-term); ethanolamine (DE); ethanolamine (DE); ethanolamine (DE)	Q96IY1	1664.88	14
623	A(+42.01)GSQD(+43.04)IFD(+43.04)AIVM(+15.99)ADE(+43.04)(+43.04)	-	M	AGSQDIFDAIVMADE	R	Acetylation (Protein N-term); ethanolamine (DE); ethanolamine (DE); Oxidation (M); ethanolamine (C-term); more	Q8WV07	1810.88	15
624	A(+42.01)GSQD(+43.04)IFD(+43.04)AIVMAD(+43.04)E(+43.04)	-	M	AGSQDIFDAIVMADE	R	Acetylation (Protein N-term); ethanolamine (DE); ethanolamine (DE); ethanolamine (DE); ethanolamine (DE)	Q8WV07	1794.88	15
625	A(+42.01)GSSTGGGGVGE(+43.04)T	-	M	AGSSTGGGGVGET	K	Acetylation (Protein N-term); ethanolamine (DE)	O14641	1120.5	13
626	A(+42.01)GSVAD(+43.04)SD(+43.04)AVV	-	M	AGSVADSDAVV	K	Acetylation (Protein N-term); ethanolamine (DE); ethanolamine (DE)	Q3ZCW2	1117.56	11
627	A(+42.01)GSYPE(+43.04)GAPAILAD(+43.04)	-	M	AGSYPEGAPAILAD	K	Acetylation (Protein N-term); ethanolamine (DE); ethanolamine (DE)	Q6P1Q9	1458.74	14
628	A(+42.01)GTGLVAGE(+43.04)VVVD(+43.04)	-	M	AGTGLVAGEVVVD	A	Acetylation (Protein N-term); ethanolamine (DE); ethanolamine (DE)	O75934	1313.72	13
629	A(+42.01)GTVVLD(+43.04)D(+43.04)VE(+43.04)L	-	M	AGTVVLDDVEL	R	Acetylation (Protein N-term); ethanolamine (DE); ethanolamine (DE); ethanolamine (DE)	P25205	1300.72	11
630	A(+42.01)GTVVLD(+43.04)D(+43.04)VEL	-	M	AGTVVLDDVEL	R	Acetylation (Protein N-term); ethanolamine (DE); ethanolamine (DE)	P25205	1257.68	11
631	A(+42.01)GTVVLD(+43.04)D(+43.04)VEL(+43.04)	-	M	AGTVVLDDVEL	R	Acetylation (Protein N-term); ethanolamine (DE); ethanolamine (DE); ethanolamine (C-term)	P25205	1300.72	11
632	A(+42.01)GTVVLD(+43.04)DVE(+43.04)L	-	M	AGTVVLDDVEL	R	Acetylation (Protein N-term); ethanolamine (DE); ethanolamine (DE)	P25205	1257.68	11
633	A(+42.01)GTVVLDD(+43.04)VE(+43.04)L	-	M	AGTVVLDDVEL	R	Acetylation (Protein N-term); ethanolamine (DE); ethanolamine (DE)	P25205	1257.68	11
634	A(+42.01)GTVVLDDVE(+43.04)L	-	M	AGTVVLDDVEL	R	Acetylation (Protein N-term); ethanolamine (DE)	P25205	1214.64	11
635	A(+42.01)GVE(+43.04)E(+43.04)VAASGSHLN	-	M	AGVEEVAASGSHLN	G	Acetylation (Protein N-term); ethanolamine (DE); ethanolamine (DE)	P50579	1467.73	14
636	A(+42.01)GVGD(+43.04)AAAPGE(+43.04)GGGGGVD(+43.04)GPQ	-	M	AGVGDAAAPGEGGGGGVDGPQ	R	Acetylation (Protein N-term); ethanolamine (DE); ethanolamine (DE); ethanolamine (DE)	Q6NXT6	1865.89	21
637	A(+42.01)GWNAYID(+43.04)N	-	M	AGWNAYIDN	L	Acetylation (Protein N-term); ethanolamine (DE)	P07737	1107.5	9
638	A(+42.01)GWNAYID(+43.04)NL	-	M	AGWNAYIDNL	M	Acetylation (Protein N-term); ethanolamine (DE)	P07737	1220.58	10
639	A(+42.01)GWNAYID(+43.04)NLM(+15.99)AD(+43.04)	-	M	AGWNAYIDNLMAD	G	Acetylation (Protein N-term); ethanolamine (DE); Oxidation (M); ethanolamine (DE)	P07737	1596.72	13
640	A(+42.01)GWNAYID(+43.04)NLM(+15.99)AD(+43.04)GTC(+57.02)	-	M	AGWNAYIDNLMADGTC	Q	Acetylation (Protein N-term); ethanolamine (DE); Oxidation (M); ethanolamine (DE); Carbamidomethylation	P07737	1914.82	16
641	A(+42.01)GWNAYID(+43.04)NLM(+15.99)AD(+43.04)GTC(+57.02)Q	-	M	AGWNAYIDNLMADGTCQ	D	Acetylation (Protein N-term); ethanolamine (DE); Oxidation (M); ethanolamine (DE); Carbamidomethylation	P07737	2042.88	17
642	A(+42.01)GWNAYID(+43.04)NLM(+15.99)ADGTC(+57.02)QD(+43.04)A	-	M	AGWNAYIDNLMADGTCQDA	A	Acetylation (Protein N-term); ethanolamine (DE); Oxidation (M); Carbamidomethylation; ethanolamine (DE)	P07737	2228.95	19
643	A(+42.01)GWNAYID(+43.04)NLMAD(+43.04)	-	M	AGWNAYIDNLMAD	G	Acetylation (Protein N-term); ethanolamine (DE); ethanolamine (DE)	P07737	1580.73	13
644	A(+42.01)GWNAYID(+43.04)NLMAD(+43.04)GTC(+57.02)	-	M	AGWNAYIDNLMADGTC	Q	Acetylation (Protein N-term); ethanolamine (DE); ethanolamine (DE); Carbamidomethylation	P07737	1898.83	16
645	A(+42.01)GWNAYID(+43.04)NLMAD(+43.04)GTC(+57.02)Q	-	M	AGWNAYIDNLMADGTCQ	D	Acetylation (Protein N-term); ethanolamine (DE); ethanolamine (DE); Carbamidomethylation	P07737	2026.89	17
646	A(+42.01)GWNAYID(+43.04)NLMAD(+43.04)GTC(+57.02)QDA(+43.04)	-	M	AGWNAYIDNLMADGTCQDA	A	Acetylation (Protein N-term); ethanolamine (DE); ethanolamine (DE); Carbamidomethylation; ethanolamine (C-term)	P07737	2255.99	19
647	A(+42.01)GWNAYID(+43.04)NLMADGTC(+57.02)QDA(+43.04)	-	M	AGWNAYIDNLMADGTCQDA	A	Acetylation (Protein N-term); ethanolamine (DE); Carbamidomethylation; ethanolamine (C-term)	P07737	2212.95	19
648	A(+42.01)GWNAYIDNLMAD(+43.04)	-	M	AGWNAYIDNLMAD	G	Acetylation (Protein N-term); ethanolamine (DE)	P07737	1537.69	13
649	A(+42.01)GYE(+43.04)YVSPE(+43.04)QL	-	M	AGYEYVSPEQL	A	Acetylation (Protein N-term); ethanolamine (DE); ethanolamine (DE)	Q9C0D9	1382.67	11
650	A(+42.01)GYE(+43.04)YVSPE(+43.04)QLAGFD(+43.04)	-	M	AGYEYVSPEQLAGFD	K	Acetylation (Protein N-term); ethanolamine (DE); ethanolamine (DE); ethanolamine (DE)	Q9C0D9	1815.87	15
651	A(+42.01)HAGGGSGGSGAGGPAG	-	M	AHAGGGSGGSGAGGPAG	R	Acetylation (Protein N-term)	O75182	1265.54	17
652	A(+42.01)HC(+57.02)VTLVQL	-	M	AHCVTLVQL	S	Acetylation (Protein N-term); Carbamidomethylation	Q99829	1081.56	9
653	A(+42.01)HIPSGGAPAAGAAPM(+15.99)GPQYC(+57.02)VC(+57.02)	-	M	AHIPSGGAPAAGAAPMGPQYCVC	K	Acetylation (Protein N-term); Oxidation (M); Carbamidomethylation; Carbamidomethylation	Q96FN4	2297	23
654	A(+42.01)HIPSGGAPAAGAAPMGPQYC(+57.02)VC(+57.02)	-	M	AHIPSGGAPAAGAAPMGPQYCVC	K	Acetylation (Protein N-term); Carbamidomethylation; Carbamidomethylation	Q96FN4	2281.01	23
655	A(+42.01)HQTGIHATE(+43.04)E(+43.04)L	-	M	AHQTGIHATEEL	K	Acetylation (Protein N-term); ethanolamine (DE); ethanolamine (DE)	Q6IBS0	1433.73	12
656	A(+42.01)IC(+57.02)QFFLQG	-	M	AICQFFLQG	R	Acetylation (Protein N-term); Carbamidomethylation	O15504	1124.53	9
657	A(+42.01)IVQTLPVPLE(+43.04)PAPE(+43.04)AATAPQAPVM(+15.99)GSVSSLISG	-	M	AIVQTLPVPLEPAPEAATAPQAPVMGSVSSLISG	R	Acetylation (Protein N-term); ethanolamine (DE); ethanolamine (DE); Oxidation (M)	Q9BRK4	3441.84	34
658	A(+42.01)KPAATAAAASE(+43.04)E(+43.04)LSQVPD(+43.04)E(+43.04)E(+43.04)LL	-	M	AKPAATAAAASEELSQVPDEELL	R	Acetylation (Protein N-term); ethanolamine (DE); ethanolamine (DE); ethanolamine (DE); ethanolamine (DE); more	A6NKD9	2567.38	23
659	A(+42.01)KPLTD(+43.04)QE(+43.04)	-	M	AKPLTDQE	K	Acetylation (Protein N-term); ethanolamine (DE); ethanolamine (DE)	P06737	1028.55	8
660	A(+42.01)KPLTD(+43.04)QE(+43.04)K	-	M	AKPLTDQEK	R	Acetylation (Protein N-term); ethanolamine (DE); ethanolamine (DE)	P06737	1156.65	9
661	A(+42.01)KPLTD(+43.04)SE(+43.04)	-	M	AKPLTDSE	K	Acetylation (Protein N-term); ethanolamine (DE); ethanolamine (DE)	P11216	987.524	8
662	A(+42.01)LD(+43.04)GPE(+43.04)QME(+43.04)LE(+43.04)E(+43.04)G	-	M	ALDGPEQMELEEG	K	Acetylation (Protein N-term); ethanolamine (DE); ethanolamine (DE); ethanolamine (DE); ethanolamine (DE); more	P62195	1673.83	13
663	A(+42.01)LD(+43.04)PAD(+43.04)QHL	-	M	ALDPADQHL	R	Acetylation (Protein N-term); ethanolamine (DE); ethanolamine (DE)	Q7Z7K0	1106.57	9
664	A(+42.01)LDGPE(+43.04)QM(+15.99)E(+43.04)LE(+43.04)E(+43.04)G	-	M	ALDGPEQMELEEG	K	Acetylation (Protein N-term); ethanolamine (DE); Oxidation (M); ethanolamine (DE); ethanolamine (DE); more	P62195	1646.78	13
665	A(+42.01)LDGPE(+43.04)QME(+43.04)LE(+43.04)E(+43.04)G	-	M	ALDGPEQMELEEG	K	Acetylation (Protein N-term); ethanolamine (DE); ethanolamine (DE); ethanolamine (DE); ethanolamine (DE)	P62195	1630.79	13
666	A(+42.01)LE(+43.04)VGD(+43.04)ME(+43.04)D(+43.04)	-	M	ALEVGDMED	G	Acetylation (Protein N-term); ethanolamine (DE); ethanolamine (DE); ethanolamine (DE); ethanolamine (DE)	Q9H814	1191.58	9
667	A(+42.01)LFPAFAGLSE(+43.04)APD(+43.04)GGSS	-	M	ALFPAFAGLSEAPDGGSS	R	Acetylation (Protein N-term); ethanolamine (DE); ethanolamine (DE)	Q9H7Z3	1820.89	18
668	A(+42.01)LFPAFAGLSE(+43.04)APDGGSS	-	M	ALFPAFAGLSEAPDGGSS	R	Acetylation (Protein N-term); ethanolamine (DE)	Q9H7Z3	1777.85	18
669	A(+42.01)LLAE(+43.04)HLL	-	M	ALLAEHLL	K	Acetylation (Protein N-term); ethanolamine (DE)	Q9NZD2	963.575	8
670	A(+42.01)LLSE(+43.04)GLD(+43.04)E(+43.04)VPAAC(+57.02)LSPC(+57.02)GPPNPTE(+43.04)LFSES(+43.04)	-	M	ALLSEGLDEVPAACLSPCGPPNPTELFSES	R	Acetylation (Protein N-term); ethanolamine (DE); ethanolamine (DE); ethanolamine (DE); Carbamidomethylation; more	Q9H4H8	3413.68	30
671	A(+42.01)LQTLQSSWVTF	-	M	ALQTLQSSWVTF	R	Acetylation (Protein N-term)	Q96BW9	1421.72	12
672	A(+42.01)LSAE(+43.04)TE(+43.04)SHIY	-	M	ALSAETESHIY	R	Acetylation (Protein N-term); ethanolamine (DE); ethanolamine (DE)	O14569	1347.67	11
673	A(+42.01)LTLFD(+43.04)TD(+43.04)E(+43.04)Y	-	M	ALTLFDTDEY	R	Acetylation (Protein N-term); ethanolamine (DE); ethanolamine (DE); ethanolamine (DE)	P15882	1357.68	10
674	A(+42.01)LTSFLPAPTQLSQD(+43.04)	-	M	ALTSFLPAPTQLSQD	Q	Acetylation (Protein N-term); ethanolamine (DE)	Q13573	1672.87	15
675	A(+42.01)LTSFLPAPTQLSQD(+43.04)QLE(+43.04)	-	M	ALTSFLPAPTQLSQDQLE	A	Acetylation (Protein N-term); ethanolamine (DE); ethanolamine (DE)	Q13573	2086.09	18
676	A(+42.01)LTSFLPAPTQLSQD(+43.04)QLE(+43.04)AE(+43.04)E(+43.04)	-	M	ALTSFLPAPTQLSQDQLEAEE	K	Acetylation (Protein N-term); ethanolamine (DE); ethanolamine (DE); ethanolamine (DE); ethanolamine (DE)	Q13573	2501.3	21
677	A(+42.01)LTSFLPAPTQLSQD(+43.04)QLE(+43.04)AEE(+43.04)(+43.04)	-	M	ALTSFLPAPTQLSQDQLEAEE	K	Acetylation (Protein N-term); ethanolamine (DE); ethanolamine (DE); ethanolamine (C-term); ethanolamine (DE)	Q13573	2501.3	21
678	A(+42.01)LTSFLPAPTQLSQDQLE(+43.04)AE(+43.04)E(+43.04)	-	M	ALTSFLPAPTQLSQDQLEAEE	K	Acetylation (Protein N-term); ethanolamine (DE); ethanolamine (DE); ethanolamine (DE)	Q13573	2458.26	21
679	A(+42.01)LVPYE(+43.04)E(+43.04)TTE(+43.04)FGLQ	-	M	ALVPYEETTEFGLQ	K	Acetylation (Protein N-term); ethanolamine (DE); ethanolamine (DE); ethanolamine (DE)	Q8WXB1	1766.91	14
680	A(+42.01)M(+15.99)AMSD(+43.04)SGAS	-	M	AMAMSDSGAS	R	Acetylation (Protein N-term); Oxidation (M); ethanolamine (DE)	Q8IYI6	1027.39	10
681	A(+42.01)M(+15.99)D(+43.04)QVNALC(+57.02)E(+43.04)QLV	-	M	AMDQVNALCEQLV	K	Acetylation (Protein N-term); Oxidation (M); ethanolamine (DE); Carbamidomethylation; ethanolamine (DE)	Q9HAV4	1633.78	13
682	A(+42.01)M(+15.99)E(+43.04)STATAAVAAE(+43.04)LVSAD(+43.04)	-	M	AMESTATAAVAAELVSAD	K	Acetylation (Protein N-term); Oxidation (M); ethanolamine (DE); ethanolamine (DE); ethanolamine (DE)	P49321	1893.94	18
683	A(+42.01)M(+15.99)SSGGSGGGVPE(+43.04)QE(+43.04)D(+43.04)	-	M	AMSSGGSGGGVPEQED	S	Acetylation (Protein N-term); Oxidation (M); ethanolamine (DE); ethanolamine (DE); ethanolamine (DE)	Q16637	1650.72	16
684	A(+42.01)M(+15.99)SSGGSGGGVPE(+43.04)QE(+43.04)D(+43.04)SVLF	-	M	AMSSGGSGGGVPEQEDSVLF	R	Acetylation (Protein N-term); Oxidation (M); ethanolamine (DE); ethanolamine (DE); ethanolamine (DE)	Q16637	2096.97	20
685	A(+42.01)M(+15.99)TAGTTTTFPM(+15.99)SNHT	-	M	AMTAGTTTTFPMSNHT	R	Acetylation (Protein N-term); Oxidation (M); Oxidation (M)	Q9Y2H1	1741.73	16
686	A(+42.01)M(+15.99)TAGTTTTFPMSNHT	-	M	AMTAGTTTTFPMSNHT	R	Acetylation (Protein N-term); Oxidation (M)	Q9Y2H1	1725.73	16
687	A(+42.01)M(+15.99)TGSTPC(+57.02)SSM(+15.99)SNHT	-	M	AMTGSTPCSSMSNHT	K	Acetylation (Protein N-term); Oxidation (M); Carbamidomethylation; Oxidation (M)	Q15208	1641.61	15
688	A(+42.01)M(+15.99)TGSTPC(+57.02)SSMSNHT	-	M	AMTGSTPCSSMSNHT	K	Acetylation (Protein N-term); Oxidation (M); Carbamidomethylation	Q15208	1625.61	15
689	A(+42.01)MAMSD(+43.04)SGAS	-	M	AMAMSDSGAS	R	Acetylation (Protein N-term); ethanolamine (DE)	Q8IYI6	1011.4	10
690	A(+42.01)MD(+43.04)QVNALC(+57.02)E(+43.04)QLV	-	M	AMDQVNALCEQLV	K	Acetylation (Protein N-term); ethanolamine (DE); Carbamidomethylation; ethanolamine (DE)	Q9HAV4	1617.79	13
691	A(+42.01)ME(+43.04)STATAAVAAE(+43.04)LVSAD	-	M	AMESTATAAVAAELVSAD	K	Acetylation (Protein N-term); ethanolamine (DE); ethanolamine (DE)	P49321	1834.9	18
692	A(+42.01)ME(+43.04)STATAAVAAE(+43.04)LVSAD(+43.04)	-	M	AMESTATAAVAAELVSAD	K	Acetylation (Protein N-term); ethanolamine (DE); ethanolamine (DE); ethanolamine (DE)	P49321	1877.94	18
693	A(+42.01)ME(+43.04)STATAAVAAE(+43.04)LVSADKIE(+43.04)D(+43.04)VPAPSTSAD(+43.04)	-	M	AMESTATAAVAAELVSADKIEDVPAPSTSAD	K	Acetylation (Protein N-term); ethanolamine (DE); ethanolamine (DE); ethanolamine (DE); ethanolamine (DE); more	P49321	3274.66	31
694	A(+42.01)MSSGGSGGGVPE(+43.04)QE(+43.04)D(+43.04)	-	M	AMSSGGSGGGVPEQED	S	Acetylation (Protein N-term); ethanolamine (DE); ethanolamine (DE); ethanolamine (DE)	Q16637	1634.72	16
695	A(+42.01)MTAGTTTTFPM(+15.99)SNHT	-	M	AMTAGTTTTFPMSNHT	R	Acetylation (Protein N-term); Oxidation (M)	Q9Y2H1	1725.73	16
696	A(+42.01)MTAGTTTTFPMSNHT	-	M	AMTAGTTTTFPMSNHT	R	Acetylation (Protein N-term)	Q9Y2H1	1709.74	16
697	A(+42.01)MTGSTPC(+57.02)SSMSNHT	-	M	AMTGSTPCSSMSNHT	K	Acetylation (Protein N-term); Carbamidomethylation	Q15208	1609.62	15
698	A(+42.01)NALASATC(+57.02)E(+43.04)	N，N，-	M，M，M	ANALASATCE	R，R，R	Acetylation (Protein N-term); Carbamidomethylation; ethanolamine (DE)	P0CW20，P0CW19，P48059	1091.49	10
699	A(+42.01)ND(+43.04)SGGPGGPSPSE(+43.04)	-	M	ANDSGGPGGPSPSE	R	Acetylation (Protein N-term); ethanolamine (DE); ethanolamine (DE)	Q9GZT9	1355.6	14
700	A(+42.01)ND(+43.04)SGGPGGPSPSERD(+43.04)(+43.04)	-	M	ANDSGGPGGPSPSERD	R	Acetylation (Protein N-term); ethanolamine (DE); ethanolamine (C-term); ethanolamine (DE)	Q9GZT9	1669.77	16
701	A(+42.01)NE(+43.04)AYPC(+57.02)PC(+57.02)D(+43.04)IGH	-	M	ANEAYPCPCDIGH	R	Acetylation (Protein N-term); ethanolamine (DE); Carbamidomethylation; Carbamidomethylation; ethanolamine (DE)	Q96DG6	1630.69	13
702	A(+42.01)NE(+43.04)AYPC(+57.02)PC(+57.02)DIGH	-	M	ANEAYPCPCDIGH	R	Acetylation (Protein N-term); ethanolamine (DE); Carbamidomethylation; Carbamidomethylation	Q96DG6	1587.64	13
703	A(+42.01)NLE(+43.04)E(+43.04)SFP	-	M	ANLEESFP	R	Acetylation (Protein N-term); ethanolamine (DE); ethanolamine (DE)	Q14690	1033.51	8
704	A(+42.01)NLE(+43.04)E(+43.04)SFPR	-	M	ANLEESFPR	G	Acetylation (Protein N-term); ethanolamine (DE); ethanolamine (DE)	Q14690	1189.61	9
705	A(+42.01)NVPWAE(+43.04)VC(+57.02)E(+43.04)	-	M	ANVPWAEVCE	K	Acetylation (Protein N-term); ethanolamine (DE); Carbamidomethylation; ethanolamine (DE)	Q96EK5	1301.61	10
706	A(+42.01)QAAGPAGGGE(+43.04)P	-	M	AQAAGPAGGGEP	R	Acetylation (Protein N-term); ethanolamine (DE)	Q08AE8	1066.5	12
707	A(+42.01)QAAGPAGGGE(+43.04)PR	-	M	AQAAGPAGGGEPR	T	Acetylation (Protein N-term); ethanolamine (DE)	Q08AE8	1222.61	13
708	A(+42.01)QALSE(+43.04)E(+43.04)E(+43.04)FQ	-	M	AQALSEEEFQ	R	Acetylation (Protein N-term); ethanolamine (DE); ethanolamine (DE); ethanolamine (DE)	Q4V328	1321.65	10
709	A(+42.01)QALSE(+43.04)E(+43.04)EFQ	-	M	AQALSEEEFQ	R	Acetylation (Protein N-term); ethanolamine (DE); ethanolamine (DE)	Q4V328	1278.61	10
710	A(+42.01)QE(+43.04)VSE(+43.04)YLSQN	-	M	AQEVSEYLSQN	P	Acetylation (Protein N-term); ethanolamine (DE); ethanolamine (DE)	Q9NXV6	1394.67	11
711	A(+42.01)QE(+43.04)VSE(+43.04)YLSQNP	-	M	AQEVSEYLSQNP	R	Acetylation (Protein N-term); ethanolamine (DE); ethanolamine (DE)	Q9NXV6	1491.72	12
712	A(+42.01)QFD(+43.04)TE(+43.04)YQ	-	M	AQFDTEYQ	R	Acetylation (Protein N-term); ethanolamine (DE); ethanolamine (DE)	Q7Z3C6	1128.51	8
713	A(+42.01)QFPTPFGGSL	-	M	AQFPTPFGGSL	D	Acetylation (Protein N-term)	Q15811	1162.57	11
714	A(+42.01)QGSHQID(+43.04)FQVLHD(+43.04)L	-	M	AQGSHQIDFQVLHDL	R	Acetylation (Protein N-term); ethanolamine (DE); ethanolamine (DE)	Q9NYJ8	1834.93	15
715	A(+42.01)QPGPASQPD(+43.04)VSLQQ	-	M	AQPGPASQPDVSLQQ	R	Acetylation (Protein N-term); ethanolamine (DE)	Q15276	1606.8	15
716	A(+42.01)QQAAD(+43.04)KY(+155.14)LYVD(+43.04)	-	M	AQQAADKYLYVD	K	Acetylation (Protein N-term); ethanolamine (DE); EDC(Y); ethanolamine (DE)	P35579	1666.9	12
717	A(+42.01)QQAAD(+43.04)KYLYVD(+43.04)	-	M	AQQAADKYLYVD	K	Acetylation (Protein N-term); ethanolamine (DE); ethanolamine (DE)	P35579	1511.76	12
718	A(+42.01)QQAADKYLYVD(+43.04)	-	M	AQQAADKYLYVD	K	Acetylation (Protein N-term); ethanolamine (DE)	P35579	1468.72	12
719	A(+42.01)QQQM(+15.99)TSSQ	-	M	AQQQMTSSQ	K	Acetylation (Protein N-term); Oxidation (M)	Q712K3	1065.44	9
720	A(+42.01)QQQMTSSQ	-	M	AQQQMTSSQ	K	Acetylation (Protein N-term)	Q712K3	1049.44	9
721	A(+42.01)QSINITE(+43.04)LNLPQLE(+43.04)M(+15.99)L	-	M	AQSINITELNLPQLEML	K	Acetylation (Protein N-term); ethanolamine (DE); ethanolamine (DE); Oxidation (M)	Q99471	2070.1	17
722	A(+42.01)QSINITE(+43.04)LNLPQLE(+43.04)ML	-	M	AQSINITELNLPQLEML	K	Acetylation (Protein N-term); ethanolamine (DE); ethanolamine (DE)	Q99471	2054.11	17
723	A(+42.01)QSSPQLD(+43.04)IQVLHD(+43.04)L	-	M	AQSSPQLDIQVLHDL	R	Acetylation (Protein N-term); ethanolamine (DE); ethanolamine (DE)	Q8N5C8	1790.95	15
724	A(+42.01)QTPAFD(+43.04)KP	-	M	AQTPAFDKP	K	Acetylation (Protein N-term); ethanolamine (DE)	P00813	1058.54	9
725	A(+42.01)QVAM(+15.99)STLPVE(+43.04)D(+43.04)	-	M	AQVAMSTLPVED	E	Acetylation (Protein N-term); Oxidation (M); ethanolamine (DE); ethanolamine (DE)	P78347	1403.7	12
726	A(+42.01)QVAM(+15.99)STLPVE(+43.04)DE(+43.04)E(+43.04)SSE(+43.04)S	-	M	AQVAMSTLPVEDEESSES	R	Acetylation (Protein N-term); Oxidation (M); ethanolamine (DE); ethanolamine (DE); ethanolamine (DE); more	P78347	2138	18
727	A(+42.01)QVAMSTLPVE(+43.04)D(+43.04)	-	M	AQVAMSTLPVED	E	Acetylation (Protein N-term); ethanolamine (DE); ethanolamine (DE)	P78347	1387.7	12
728	A(+42.01)QVAMSTLPVE(+43.04)D(+43.04)E(+43.04)E(+43.04)SSE(+43.04)S	-	M	AQVAMSTLPVEDEESSES	R	Acetylation (Protein N-term); ethanolamine (DE); ethanolamine (DE); ethanolamine (DE); ethanolamine (DE); more	P78347	2165.05	18
729	A(+42.01)QVAMSTLPVE(+43.04)D(+43.04)EE(+43.04)SSE(+43.04)S	-	M	AQVAMSTLPVEDEESSES	R	Acetylation (Protein N-term); ethanolamine (DE); ethanolamine (DE); ethanolamine (DE); ethanolamine (DE)	P78347	2122.01	18
730	A(+42.01)QVAMSTLPVE(+43.04)DE(+43.04)E(+43.04)SSE(+43.04)S	-	M	AQVAMSTLPVEDEESSES	R	Acetylation (Protein N-term); ethanolamine (DE); ethanolamine (DE); ethanolamine (DE); ethanolamine (DE)	P78347	2122.01	18
731	A(+42.01)QVLHVPAPFPGTPGPASPPAFPA	-	M	AQVLHVPAPFPGTPGPASPPAFPA	K	Acetylation (Protein N-term)	Q63ZY3	2364.23	24
732	A(+42.01)QWNQLQQLD(+43.04)T	-	M	AQWNQLQQLDT	R	Acetylation (Protein N-term); ethanolamine (DE)	P40763	1428.7	11
733	A(+42.01)QWNQLQQLDTR	-	M	AQWNQLQQLDTR	Y	Acetylation (Protein N-term)	P40763	1541.76	12
734	A(+42.01)RPLVPSSQ	-	M	ARPLVPSSQ	K	Acetylation (Protein N-term)	P49427	995.54	9
735	A(+42.01)SAAAGE(+43.04)AE(+43.04)E(+43.04)TT	-	M	ASAAAGEAEETT	R	Acetylation (Protein N-term); ethanolamine (DE); ethanolamine (DE); ethanolamine (DE)	Q86VE0	1277.61	12
736	A(+42.01)SAC(+57.02)GAPGPGGAL	-	M	ASACGAPGPGGAL	G	Acetylation (Protein N-term); Carbamidomethylation	O15357	1126.51	13
737	A(+42.01)SAC(+57.02)GAPGPGGALGSQAPSWYH	-	M	ASACGAPGPGGALGSQAPSWYH	R	Acetylation (Protein N-term); Carbamidomethylation	O15357	2139.94	22
738	A(+42.01)SAGGE(+43.04)D(+43.04)C(+57.02)E(+43.04)SPAPE(+43.04)AD(+43.04)	-	M	ASAGGEDCESPAPEAD	R	Acetylation (Protein N-term); ethanolamine (DE); ethanolamine (DE); Carbamidomethylation; ethanolamine (DE); more	Q9HA47	1818.81	16
739	A(+42.01)SAGGE(+43.04)D(+43.04)C(+57.02)E(+43.04)SPAPE(+43.04)AD(+43.04)RPHQ	-	M	ASAGGEDCESPAPEADRPHQ	R	Acetylation (Protein N-term); ethanolamine (DE); ethanolamine (DE); Carbamidomethylation; ethanolamine (DE); more	Q9HA47	2337.08	20
740	A(+42.01)SAGGE(+43.04)D(+43.04)C(+57.02)E(+43.04)SPAPEAD(+43.04)(+43.04)	-	M	ASAGGEDCESPAPEAD	R	Acetylation (Protein N-term); ethanolamine (DE); ethanolamine (DE); Carbamidomethylation; ethanolamine (DE); more	Q9HA47	1818.81	16
741	A(+42.01)SALE(+43.04)QFVNSV	-	M	ASALEQFVNSV	R	Acetylation (Protein N-term); ethanolamine (DE)	Q9UNS2	1248.63	11
742	A(+42.01)SASTQPAALSAE(+43.04)QA	-	M	ASASTQPAALSAEQA	K	Acetylation (Protein N-term); ethanolamine (DE)	Q99622	1486.73	15
743	A(+42.01)SASYHISNL	-	M	ASASYHISNL	L	Acetylation (Protein N-term)	Q86VP6	1103.52	10
744	A(+42.01)SASYHISNLL	-	M	ASASYHISNLL	E	Acetylation (Protein N-term)	Q86VP6	1216.61	11
745	A(+42.01)SASYHISNLLE	-	M	ASASYHISNLLE	K	Acetylation (Protein N-term)	Q86VP6	1345.65	12
746	A(+42.01)SASYHISNLLE(+43.04)	-	M	ASASYHISNLLE	K	Acetylation (Protein N-term); ethanolamine (DE)	Q86VP6	1388.69	12
747	A(+42.01)SAVLSSVPTTAS	-	M	ASAVLSSVPTTAS	R	Acetylation (Protein N-term)	Q5VSY0	1231.63	13
748	A(+42.01)SAVSPANLPAVL	-	M	ASAVSPANLPAVL	L	Acetylation (Protein N-term)	P51610	1250.69	13
749	A(+42.01)SAVSPANLPAVLLQP	-	M	ASAVSPANLPAVLLQP	R	Acetylation (Protein N-term)	P51610	1588.88	16
750	A(+42.01)SAVSPANLPAVLLQPR	-	M	ASAVSPANLPAVLLQPR	W	Acetylation (Protein N-term)	P51610	1744.98	17
751	A(+42.01)SC(+57.02)AE(+43.04)PSE(+43.04)PSAPLPAGVPPLE(+43.04)D(+43.04)FEVLD(+43.04)(+43.04)	-	M	ASCAEPSEPSAPLPAGVPPLEDFEVLD	G	Acetylation (Protein N-term); Carbamidomethylation; ethanolamine (DE); ethanolamine (DE); ethanolamine (DE); more	Q14318	3093.57	27
752	A(+42.01)SC(+57.02)ASID(+43.04)IE(+43.04)D(+43.04)ATQHL	-	M	ASCASIDIEDATQHL	R	Acetylation (Protein N-term); Carbamidomethylation; ethanolamine (DE); ethanolamine (DE); ethanolamine (DE)	Q6P2E9	1800.87	15
753	A(+42.01)SC(+57.02)ASID(+43.04)IE(+43.04)DATQHL	-	M	ASCASIDIEDATQHL	R	Acetylation (Protein N-term); Carbamidomethylation; ethanolamine (DE); ethanolamine (DE)	Q6P2E9	1757.83	15
754	A(+42.01)SE(+43.04)IHMTGPM(+15.99)C(+57.02)LIE(+43.04)NTNG	-	M	ASEIHMTGPMCLIENTNG	R	Acetylation (Protein N-term); ethanolamine (DE); Oxidation (M); Carbamidomethylation; ethanolamine (DE)	P32455	2117.95	18
755	A(+42.01)SE(+43.04)IHMTGPMC(+57.02)LIE(+43.04)NTNG	-	M	ASEIHMTGPMCLIENTNG	R	Acetylation (Protein N-term); ethanolamine (DE); Carbamidomethylation; ethanolamine (DE)	P32455	2101.96	18
756	A(+42.01)SE(+43.04)LE(+43.04)PE(+43.04)VQAID(+43.04)	-	M	ASELEPEVQAID	R	Acetylation (Protein N-term); ethanolamine (DE); ethanolamine (DE); ethanolamine (DE); ethanolamine (DE)	Q8IWV8	1513.8	12
757	A(+42.01)SE(+43.04)SE(+43.04)TLNPSA	-	M	ASESETLNPSA	R	Acetylation (Protein N-term); ethanolamine (DE); ethanolamine (DE)	O75164	1232.59	11
758	A(+42.01)SFVTE(+43.04)VLAHSG	-	M	ASFVTEVLAHSG	R	Acetylation (Protein N-term); ethanolamine (DE)	O43264	1301.66	12
759	A(+42.01)SGADSKGD(+43.04)D(+43.04)LSTAIL	-	M	ASGADSKGDDLSTAIL	K	Acetylation (Protein N-term); ethanolamine (DE); ethanolamine (DE)	P55072	1647.83	16
760	A(+42.01)SGADSKGDD(+43.04)LSTAIL	-	M	ASGADSKGDDLSTAIL	K	Acetylation (Protein N-term); ethanolamine (DE)	P55072	1604.79	16
761	A(+42.01)SGAGGVGGGGGG	-	M	ASGAGGVGGGGGG	K	Acetylation (Protein N-term)	P49790	901.389	13
762	A(+42.01)SGAGGVGGGGGGK	-	M	ASGAGGVGGGGGGK	I	Acetylation (Protein N-term)	P49790	1029.48	14
763	A(+42.01)SGAGGVGGGGGGKI	-	M	ASGAGGVGGGGGGKI	R	Acetylation (Protein N-term)	P49790	1142.57	15
764	A(+42.01)SGAYNPYIE(+43.04)IIE(+43.04)QP	-	M	ASGAYNPYIEIIEQP	R	Acetylation (Protein N-term); ethanolamine (DE); ethanolamine (DE)	Q04864	1791.9	15
765	A(+42.01)SGAYNPYIE(+43.04)IIE(+43.04)QPR	-	M	ASGAYNPYIEIIEQPR	Q	Acetylation (Protein N-term); ethanolamine (DE); ethanolamine (DE)	Q04864	1948.01	16
766	A(+42.01)SGAYNPYIE(+43.04)IIE(+43.04)QPRQ	-	M	ASGAYNPYIEIIEQPRQ	R	Acetylation (Protein N-term); ethanolamine (DE); ethanolamine (DE)	Q04864	2076.06	17
767	A(+42.01)SGE(+43.04)HSPGSGAA	-	M	ASGEHSPGSGAA	R	Acetylation (Protein N-term); ethanolamine (DE)	Q9H4A4	1111.49	12
768	A(+42.01)SGGGGC(+57.02)SASE(+43.04)	-	M	ASGGGGCSASE	R	Acetylation (Protein N-term); Carbamidomethylation; ethanolamine (DE)	Q13596	1023.39	11
769	A(+42.01)SGGSGGVSVPALWSE(+43.04)VN	-	M	ASGGSGGVSVPALWSEVN	R	Acetylation (Protein N-term); ethanolamine (DE)	O76094	1757.86	18
770	A(+42.01)SGRPE(+43.04)E(+43.04)LWE(+43.04)AVVGAAE(+43.04)	-	M	ASGRPEELWEAVVGAAE	R	Acetylation (Protein N-term); ethanolamine (DE); ethanolamine (DE); ethanolamine (DE); ethanolamine (DE)	Q96B36	1984.04	17
771	A(+42.01)SGVAVSD(+43.04)	-	M	ASGVAVSD	G	Acetylation (Protein N-term); ethanolamine (DE)	P23528	789.387	8
772	A(+42.01)SGVAVSD(+43.04)GVI	-	M	ASGVAVSDGVI	K	Acetylation (Protein N-term); ethanolamine (DE)	P23528	1058.56	11
773	A(+42.01)SGVAVSD(+43.04)GVIK	-	M	ASGVAVSDGVIK	V	Acetylation (Protein N-term); ethanolamine (DE)	P23528	1186.66	12
774	A(+42.01)SGVAVSDGVI	-	M	ASGVAVSDGVI	K	Acetylation (Protein N-term)	P23528	1015.52	11
775	A(+42.01)SGVAVSDGVIK	-	M	ASGVAVSDGVIK	V	Acetylation (Protein N-term)	P23528	1143.61	12
776	A(+42.01)SGVGAAFE(+43.04)E(+43.04)LPHD(+43.04)	-	M	ASGVGAAFEELPHD	G	Acetylation (Protein N-term); ethanolamine (DE); ethanolamine (DE); ethanolamine (DE)	Q96DX7	1569.78	14
777	A(+42.01)SGVQVAD(+43.04)E(+43.04)VC(+57.02)	-	M	ASGVQVADEVC	R	Acetylation (Protein N-term); ethanolamine (DE); ethanolamine (DE); Carbamidomethylation	P60981	1261.6	11
778	A(+42.01)SGVQVAD(+43.04)EVC(+57.02)	-	M	ASGVQVADEVC	R	Acetylation (Protein N-term); ethanolamine (DE); Carbamidomethylation	P60981	1218.56	11
779	A(+42.01)SGVQVADE(+43.04)VC(+57.02)	-	M	ASGVQVADEVC	R	Acetylation (Protein N-term); ethanolamine (DE); Carbamidomethylation	P60981	1218.56	11
780	A(+42.01)SGVTVND(+43.04)E(+43.04)VI	-	M	ASGVTVNDEVI	K	Acetylation (Protein N-term); ethanolamine (DE); ethanolamine (DE)	Q9Y281	1230.65	11
781	A(+42.01)SILD(+43.04)E(+43.04)YE(+43.04)NSLS	-	M	ASILDEYENSLS	R	Acetylation (Protein N-term); ethanolamine (DE); ethanolamine (DE); ethanolamine (DE)	Q9P253	1510.75	12
782	A(+42.01)SIM(+15.99)E(+43.04)GPLS	-	M	ASIMEGPLS	K	Acetylation (Protein N-term); Oxidation (M); ethanolamine (DE)	Q96SU4	1004.48	9
783	A(+42.01)SIWVGH	-	M	ASIWVGH	R	Acetylation (Protein N-term)	P12429	810.402	7
784	A(+42.01)SM(+15.99)GTLAFD(+43.04)E(+43.04)Y	-	M	ASMGTLAFDEY	G	Acetylation (Protein N-term); Oxidation (M); ethanolamine (DE); ethanolamine (DE)	P48643	1347.6	11
785	A(+42.01)SM(+15.99)GTLAFD(+43.04)E(+43.04)YG	-	M	ASMGTLAFDEYG	R	Acetylation (Protein N-term); Oxidation (M); ethanolamine (DE); ethanolamine (DE)	P48643	1404.62	12
786	A(+42.01)SM(+15.99)GTLAFD(+43.04)EYG	-	M	ASMGTLAFDEYG	R	Acetylation (Protein N-term); Oxidation (M); ethanolamine (DE)	P48643	1361.58	12
787	A(+42.01)SM(+15.99)GTLAFDE(+43.04)YG	-	M	ASMGTLAFDEYG	R	Acetylation (Protein N-term); Oxidation (M); ethanolamine (DE)	P48643	1361.58	12
788	A(+42.01)SMGTLAFD(+43.04)E(+43.04)Y	-	M	ASMGTLAFDEY	G	Acetylation (Protein N-term); ethanolamine (DE); ethanolamine (DE)	P48643	1331.61	11
789	A(+42.01)SMGTLAFD(+43.04)E(+43.04)YG	-	M	ASMGTLAFDEYG	R	Acetylation (Protein N-term); ethanolamine (DE); ethanolamine (DE)	P48643	1388.63	12
790	A(+42.01)SMGTLAFD(+43.04)EY(+155.14)G	-	M	ASMGTLAFDEYG	R	Acetylation (Protein N-term); ethanolamine (DE); EDC(Y)	P48643	1500.73	12
791	A(+42.01)SMGTLAFD(+43.04)EYG	-	M	ASMGTLAFDEYG	R	Acetylation (Protein N-term); ethanolamine (DE)	P48643	1345.59	12
792	A(+42.01)SMGTLAFDE(+43.04)YG	-	M	ASMGTLAFDEYG	R	Acetylation (Protein N-term); ethanolamine (DE)	P48643	1345.59	12
793	A(+42.01)SND(+43.04)YTQQATQ	-	M	ASNDYTQQATQ	S	Acetylation (Protein N-term); ethanolamine (DE)	P35637	1310.57	11
794	A(+42.01)SND(+43.04)YTQQATQSY	-	M	ASNDYTQQATQSY	G	Acetylation (Protein N-term); ethanolamine (DE)	P35637	1560.67	13
795	A(+42.01)SND(+43.04)YTQQATQSYG	-	M	ASNDYTQQATQSYG	A	Acetylation (Protein N-term); ethanolamine (DE)	P35637	1617.69	14
796	A(+42.01)SND(+43.04)YTQQATQSYGAYPTQPGQGY	-	M	ASNDYTQQATQSYGAYPTQPGQGY	S	Acetylation (Protein N-term); ethanolamine (DE)	P35637	2680.17	24
797	A(+42.01)SND(+43.04)YTQQATQSYGAYPTQPGQGYSQQ	-	M	ASNDYTQQATQSYGAYPTQPGQGYSQQ	S	Acetylation (Protein N-term); ethanolamine (DE)	P35637	3023.32	27
798	A(+42.01)SND(+43.04)YTQQATQSYGAYPTQPGQGYSQQSSQPYGQQ	-	M	ASNDYTQQATQSYGAYPTQPGQGYSQQSSQPYGQQ	S	Acetylation (Protein N-term); ethanolamine (DE)	P35637	3898.69	35
799	A(+42.01)SND(+43.04)YTQQATQSYGAYPTQPGQGYSQQSSQPYGQQSY	-	M	ASNDYTQQATQSYGAYPTQPGQGYSQQSSQPYGQQSY	S	Acetylation (Protein N-term); ethanolamine (DE)	P35637	4148.79	37
800	A(+42.01)SPPAC(+57.02)PSE(+43.04)E(+43.04)D(+43.04)E(+43.04)SL	-	M	ASPPACPSEEDESL	K	Acetylation (Protein N-term); Carbamidomethylation; ethanolamine (DE); ethanolamine (DE); ethanolamine (DE); more	P31321	1701.79	14
801	A(+42.01)SQSQGIQQLLQAE(+43.04)	-，-	M，M	ASQSQGIQQLLQAE	K，K	Acetylation (Protein N-term); ethanolamine (DE)	O75348，O95670	1584.81	14
802	A(+42.01)SSAASSE(+43.04)HFE(+43.04)	-	M	ASSAASSEHFE	K	Acetylation (Protein N-term); ethanolamine (DE); ethanolamine (DE)	Q9UEU0	1249.56	11
803	A(+42.01)SSAQSGGSSGGPAVPTVQ	-	M	ASSAQSGGSSGGPAVPTVQ	R	Acetylation (Protein N-term)	Q7KZF4	1685.79	19
804	A(+42.01)SSD(+43.04)LE(+43.04)QLC(+57.02)SHVNE(+43.04)	-	M	ASSDLEQLCSHVNE	K	Acetylation (Protein N-term); ethanolamine (DE); ethanolamine (DE); Carbamidomethylation; ethanolamine (DE)	Q96BD8	1758.82	14
805	A(+42.01)SSE(+43.04)QAE(+43.04)QPSQPSSTPGSE(+43.04)NVLP	-	M	ASSEQAEQPSQPSSTPGSENVLP	R	Acetylation (Protein N-term); ethanolamine (DE); ethanolamine (DE); ethanolamine (DE)	O75381	2497.19	23
806	A(+42.01)SSGAGD(+43.04)PLD(+43.04)S	-	M	ASSGAGDPLDS	K	Acetylation (Protein N-term); ethanolamine (DE); ethanolamine (DE)	Q9Y2R0	1103.51	11
807	A(+42.01)SSGAGD(+43.04)PLD(+43.04)SK	-	M	ASSGAGDPLDSK	R	Acetylation (Protein N-term); ethanolamine (DE); ethanolamine (DE)	Q9Y2R0	1231.6	12
808	A(+42.01)SSGAGD(+43.04)PLDSK	-	M	ASSGAGDPLDSK	R	Acetylation (Protein N-term); ethanolamine (DE)	Q9Y2R0	1188.56	12
809	A(+42.01)SSGAGD(+43.04)PLDSK(+43.04)	-	M	ASSGAGDPLDSK	R	Acetylation (Protein N-term); ethanolamine (DE); ethanolamine (C-term)	Q9Y2R0	1231.6	12
810	A(+42.01)SSSTVPLGFHYE(+43.04)T	-	M	ASSSTVPLGFHYET	K	Acetylation (Protein N-term); ethanolamine (DE)	Q9BXK5	1579.75	14
811	A(+42.01)SSVGNVAD(+43.04)STE(+43.04)PT	-	M	ASSVGNVADSTEPT	K	Acetylation (Protein N-term); ethanolamine (DE); ethanolamine (DE)	O15294	1461.69	14
812	A(+42.01)SSVGNVAD(+43.04)STE(+43.04)PTK	-	M	ASSVGNVADSTEPTK	R	Acetylation (Protein N-term); ethanolamine (DE); ethanolamine (DE)	O15294	1589.79	15
813	A(+42.01)SSVGNVADSTE(+43.04)PTK	-	M	ASSVGNVADSTEPTK	R	Acetylation (Protein N-term); ethanolamine (DE)	O15294	1546.75	15
814	A(+42.01)STD(+43.04)YSTYSQAAAQ	-	M	ASTDYSTYSQAAAQ	Q	Acetylation (Protein N-term); ethanolamine (DE)	Q01844	1547.67	14
815	A(+42.01)STD(+43.04)YSTYSQAAAQQGY	-	M	ASTDYSTYSQAAAQQGY	S	Acetylation (Protein N-term); ethanolamine (DE)	Q01844	1895.82	17
816	A(+42.01)STD(+43.04)YSTYSQAAAQQGYS	-	M	ASTDYSTYSQAAAQQGYS	A	Acetylation (Protein N-term); ethanolamine (DE)	Q01844	1982.85	18
817	A(+42.01)STD(+43.04)YSTYSQAAAQQGYSAY	-	M	ASTDYSTYSQAAAQQGYSAY	T	Acetylation (Protein N-term); ethanolamine (DE)	Q01844	2216.95	20
818	A(+42.01)STD(+43.04)YSTYSQAAAQQGYSAYTAQPTQGY	-	M	ASTDYSTYSQAAAQQGYSAYTAQPTQGY	A	Acetylation (Protein N-term); ethanolamine (DE)	Q01844	3063.34	28
819	A(+42.01)STITGSQD(+43.04)C(+57.02)IVNH	-	M	ASTITGSQDCIVNH	R	Acetylation (Protein N-term); ethanolamine (DE); Carbamidomethylation	Q16600	1586.74	14
820	A(+42.01)STNAE(+43.04)SQLQ	-	M	ASTNAESQLQ	R	Acetylation (Protein N-term); ethanolamine (DE)	Q9BQS8	1132.54	10
821	A(+42.01)STVE(+43.04)GGD(+43.04)TALLPE(+43.04)FPR	-	M	ASTVEGGDTALLPEFPR	G	Acetylation (Protein N-term); ethanolamine (DE); ethanolamine (DE); ethanolamine (DE)	O15254	1930.02	17
822	A(+42.01)SVAVD(+43.04)PQPSVVT	-	M	ASVAVDPQPSVVT	R	Acetylation (Protein N-term); ethanolamine (DE)	Q99541	1353.71	13
823	A(+42.01)SVGE(+43.04)C(+57.02)PAPVPV	-	M	ASVGECPAPVPV	K	Acetylation (Protein N-term); ethanolamine (DE); Carbamidomethylation	P56134	1266.63	12
824	A(+42.01)SVGE(+43.04)C(+57.02)PAPVPVK	-	M	ASVGECPAPVPVK	D	Acetylation (Protein N-term); ethanolamine (DE); Carbamidomethylation	P56134	1394.72	13
825	A(+42.01)SVGE(+43.04)C(+57.02)PAPVPVKD(+43.04)	-	M	ASVGECPAPVPVKD	K	Acetylation (Protein N-term); ethanolamine (DE); Carbamidomethylation; ethanolamine (DE)	P56134	1552.79	14
826	A(+42.01)SVGE(+43.04)C(+57.02)PAPVPVKDK	-	M	ASVGECPAPVPVKDK	K	Acetylation (Protein N-term); ethanolamine (DE); Carbamidomethylation	P56134	1637.84	15
827	A(+42.01)SVGEC(+57.02)PAPVPV	-	M	ASVGECPAPVPV	K	Acetylation (Protein N-term); Carbamidomethylation	P56134	1223.59	12
828	A(+42.01)SVGEC(+57.02)PAPVPVKD(+43.04)	-	M	ASVGECPAPVPVKD	K	Acetylation (Protein N-term); Carbamidomethylation; ethanolamine (DE)	P56134	1509.75	14
829	A(+42.01)SVSALTE(+43.04)E(+43.04)LD(+43.04)	-	M	ASVSALTEELD	S	Acetylation (Protein N-term); ethanolamine (DE); ethanolamine (DE); ethanolamine (DE)	P46063	1304.68	11
830	A(+42.01)SVSE(+43.04)LAC(+57.02)IY	-	M	ASVSELACIY	S	Acetylation (Protein N-term); ethanolamine (DE); Carbamidomethylation	P05386	1196.57	10
831	A(+42.01)SVSE(+43.04)LAC(+57.02)IYS	-	M	ASVSELACIYS	A	Acetylation (Protein N-term); ethanolamine (DE); Carbamidomethylation	P05386	1283.61	11
832	A(+42.01)SVSE(+43.04)LAC(+57.02)IYSA	-	M	ASVSELACIYSA	L	Acetylation (Protein N-term); ethanolamine (DE); Carbamidomethylation	P05386	1354.64	12
833	A(+42.01)SVSE(+43.04)LAC(+57.02)IYSAL	-	M	ASVSELACIYSAL	I	Acetylation (Protein N-term); ethanolamine (DE); Carbamidomethylation	P05386	1467.73	13
834	A(+42.01)SVSE(+43.04)LAC(+57.02)IYSALILHD(+43.04)D(+43.04)E(+43.04)VTVTED(+43.04)(+43.04)	-	M	ASVSELACIYSALILHDDEVTVTED	K	Acetylation (Protein N-term); ethanolamine (DE); Carbamidomethylation; ethanolamine (DE); ethanolamine (DE); more	P05386	3049.56	25
835	A(+42.01)SVSE(+43.04)LAC(+57.02)IYSALILHDD(+43.04)(+43.04)	-	M	ASVSELACIYSALILHDD	E	Acetylation (Protein N-term); ethanolamine (DE); Carbamidomethylation; ethanolamine (C-term); ethanolamine (DE)	P05386	2147.09	18
836	A(+42.01)SVSSATFSGHGA	-	M	ASVSSATFSGHGA	R	Acetylation (Protein N-term)	Q7Z4H3	1219.55	13
837	A(+42.01)SVTLSE(+43.04)AE(+43.04)	-	M	ASVTLSEAE	K	Acetylation (Protein N-term); ethanolamine (DE); ethanolamine (DE)	Q15024	1033.53	9
838	A(+42.01)SYYE(+43.04)ILD(+43.04)VP	-	M	ASYYEILDVP	R	Acetylation (Protein N-term); ethanolamine (DE); ethanolamine (DE)	P25686	1296.66	10
839	A(+42.01)TAAE(+43.04)TSASE(+43.04)PE(+43.04)AE(+43.04)S	-	M	ATAAETSASEPEAES	K	Acetylation (Protein N-term); ethanolamine (DE); ethanolamine (DE); ethanolamine (DE); ethanolamine (DE)	Q15020	1663.79	15
840	A(+42.01)TAAE(+43.04)TSASE(+43.04)PE(+43.04)AES(+43.04)	-	M	ATAAETSASEPEAES	K	Acetylation (Protein N-term); ethanolamine (DE); ethanolamine (DE); ethanolamine (DE); ethanolamine (C-term)	Q15020	1663.79	15
841	A(+42.01)TAAE(+43.04)TSASE(+43.04)PE(+43.04)AESKAGPK	-	M	ATAAETSASEPEAESKAGPK	A	Acetylation (Protein N-term); ethanolamine (DE); ethanolamine (DE); ethanolamine (DE)	Q15020	2102.05	20
842	A(+42.01)TAAE(+43.04)TSASE(+43.04)PEAE(+43.04)S	-	M	ATAAETSASEPEAES	K	Acetylation (Protein N-term); ethanolamine (DE); ethanolamine (DE); ethanolamine (DE)	Q15020	1620.75	15
843	A(+42.01)TAAETSASE(+43.04)PE(+43.04)AE(+43.04)S	-	M	ATAAETSASEPEAES	K	Acetylation (Protein N-term); ethanolamine (DE); ethanolamine (DE); ethanolamine (DE)	Q15020	1620.75	15
844	A(+42.01)TAATE(+43.04)E(+43.04)PFPFH	-	M	ATAATEEPFPFH	G	Acetylation (Protein N-term); ethanolamine (DE); ethanolamine (DE)	P29144	1444.7	12
845	A(+42.01)TAATE(+43.04)E(+43.04)PFPFHGLLP	-	M	ATAATEEPFPFHGLLP	K	Acetylation (Protein N-term); ethanolamine (DE); ethanolamine (DE)	P29144	1824.94	16
846	A(+42.01)TAE(+43.04)VLNIG	-	M	ATAEVLNIG	K	Acetylation (Protein N-term); ethanolamine (DE)	P22234	971.529	9
847	A(+42.01)TAE(+43.04)VLNIGK	-	M	ATAEVLNIGK	K	Acetylation (Protein N-term); ethanolamine (DE)	P22234	1099.62	10
848	A(+42.01)TAEVLNIGK	-	M	ATAEVLNIGK	K	Acetylation (Protein N-term)	P22234	1056.58	10
849	A(+42.01)TALSE(+43.04)E(+43.04)E(+43.04)LD(+43.04)NE(+43.04)	-	M	ATALSEEELDNE	D	Acetylation (Protein N-term); ethanolamine (DE); ethanolamine (DE); ethanolamine (DE); ethanolamine (DE); more	Q9NVH1	1576.79	12
850	A(+42.01)TAPYNYSYIF	-	M	ATAPYNYSYIF	K	Acetylation (Protein N-term)	P61106	1350.61	11
851	A(+42.01)TASGASD(+43.04)LSGSGAPPPGVGAQAAAAAE(+43.04)E(+43.04)EE(+43.04)(+43.04)	-	M	ATASGASDLSGSGAPPPGVGAQAAAAAEEEE	R	Acetylation (Protein N-term); ethanolamine (DE); ethanolamine (DE); ethanolamine (DE); ethanolamine (C-term); more	Q3MII6	2982.45	31
852	A(+42.01)TATPVPP	-	M	ATATPVPP	R	Acetylation (Protein N-term)	P20700	794.417	8
853	A(+42.01)TATPVPPR	-	M	ATATPVPPR	M	Acetylation (Protein N-term)	P20700	950.519	9
854	A(+42.01)TAVE(+43.04)TE(+43.04)AC(+57.02)QPTD(+43.04)	-	M	ATAVETEACQPTD	A	Acetylation (Protein N-term); ethanolamine (DE); ethanolamine (DE); Carbamidomethylation; ethanolamine (DE)	Q9UK61	1562.72	13
855	A(+42.01)TD(+43.04)TSQGE(+43.04)LVHP	-	M	ATDTSQGELVHP	K	Acetylation (Protein N-term); ethanolamine (DE); ethanolamine (DE)	Q5SSJ5	1381.68	12
856	A(+42.01)TD(+43.04)TSQGELVHP	-	M	ATDTSQGELVHP	K	Acetylation (Protein N-term); ethanolamine (DE)	Q5SSJ5	1338.64	12
857	A(+42.01)TDTSQGE(+43.04)LVHP	-	M	ATDTSQGELVHP	K	Acetylation (Protein N-term); ethanolamine (DE)	Q5SSJ5	1338.64	12
858	A(+42.01)TE(+43.04)GMILTNHD(+43.04)HQI	-	M	ATEGMILTNHDHQI	R	Acetylation (Protein N-term); ethanolamine (DE); ethanolamine (DE)	Q9NQX3	1706.84	14
859	A(+42.01)TE(+43.04)HPE(+43.04)PP	-	M	ATEHPEPP	K	Acetylation (Protein N-term); ethanolamine (DE); ethanolamine (DE)	Q13435	1004.49	8
860	A(+42.01)TE(+43.04)HPE(+43.04)PPK	-	M	ATEHPEPPK	A	Acetylation (Protein N-term); ethanolamine (DE); ethanolamine (DE)	Q13435	1132.59	9
861	A(+42.01)TE(+43.04)HPE(+43.04)PPKAE(+43.04)	-	M	ATEHPEPPKAE	L	Acetylation (Protein N-term); ethanolamine (DE); ethanolamine (DE); ethanolamine (DE)	Q13435	1375.71	11
862	A(+42.01)TE(+43.04)LE(+43.04)YE(+43.04)SVLC(+57.02)V	-	M	ATELEYESVLCV	K	Acetylation (Protein N-term); ethanolamine (DE); ethanolamine (DE); ethanolamine (DE); Carbamidomethylation	Q8NC96	1582.79	12
863	A(+42.01)TE(+43.04)STPSE(+43.04)IIE(+43.04)	-	M	ATESTPSEIIE	R	Acetylation (Protein N-term); ethanolamine (DE); ethanolamine (DE); ethanolamine (DE)	Q9BX69	1346.69	11
864	A(+42.01)TE(+43.04)TVE(+43.04)LH	-	M	ATETVELH	K	Acetylation (Protein N-term); ethanolamine (DE); ethanolamine (DE)	P82979	1026.53	8
865	A(+42.01)TETVE(+43.04)LH	-	M	ATETVELH	K	Acetylation (Protein N-term); ethanolamine (DE)	P82979	983.492	8
866	A(+42.01)TFSGPAGPIL	-	M	ATFSGPAGPIL	S	Acetylation (Protein N-term)	Q9BYG3	1071.56	11
867	A(+42.01)TFSGPAGPILSLNPQE(+43.04)D(+43.04)VE(+43.04)FQ	-	M	ATFSGPAGPILSLNPQEDVEFQ	K	Acetylation (Protein N-term); ethanolamine (DE); ethanolamine (DE); ethanolamine (DE)	Q9BYG3	2487.26	22
868	A(+42.01)TGANATPLD(+43.04)FPS	-	M	ATGANATPLDFPS	K	Acetylation (Protein N-term); ethanolamine (DE)	Q15637	1345.65	13
869	A(+42.01)TGANATPLD(+43.04)FPSK	-	M	ATGANATPLDFPSK	K	Acetylation (Protein N-term); ethanolamine (DE)	Q15637	1473.75	14
870	A(+42.01)TGANATPLD(+43.04)FPSKK	-	M	ATGANATPLDFPSKK	R	Acetylation (Protein N-term); ethanolamine (DE)	Q15637	1601.84	15
871	A(+42.01)TGLGE(+43.04)PVYGLSE(+43.04)D(+43.04)E(+43.04)GE(+43.04)S	-	M	ATGLGEPVYGLSEDEGES	R	Acetylation (Protein N-term); ethanolamine (DE); ethanolamine (DE); ethanolamine (DE); ethanolamine (DE); more	Q96PU5	2066.02	18
872	A(+42.01)THGQTC(+57.02)A	-	M	ATHGQTCA	R	Acetylation (Protein N-term); Carbamidomethylation	P45880	886.36	8
873	A(+42.01)TLKE(+43.04)KLIAPVAE(+43.04)EE(+43.04)ATVPNN	-	M	ATLKEKLIAPVAEEEATVPNN	K	Acetylation (Protein N-term); ethanolamine (DE); ethanolamine (DE); ethanolamine (DE)	P07195	2407.33	21
874	A(+42.01)TLLSHPQQ	-	M	ATLLSHPQQ	R	Acetylation (Protein N-term)	Q70J99	1035.53	9
875	A(+42.01)TNFLAHE	-	M	ATNFLAHE	K	Acetylation (Protein N-term)	P29692	943.44	8
876	A(+42.01)TNFLAHE(+43.04)	-	M	ATNFLAHE	K	Acetylation (Protein N-term); ethanolamine (DE)	P29692	986.482	8
877	A(+42.01)TNIE(+43.04)QIF	-	M	ATNIEQIF	R	Acetylation (Protein N-term); ethanolamine (DE)	P18583	1019.53	8
878	A(+42.01)TNWGSLLQD(+43.04)	-	M	ATNWGSLLQD	K	Acetylation (Protein N-term); ethanolamine (DE)	P48637	1188.58	10
879	A(+42.01)TPLAVNSAASLWGPY	-	M	ATPLAVNSAASLWGPY	K	Acetylation (Protein N-term)	Q92621	1658.83	16
880	A(+42.01)TPLVAGPAAL	-	M	ATPLVAGPAAL	R	Acetylation (Protein N-term)	Q9BSI4	1021.58	11
881	A(+42.01)TQAHSLSYAGC(+57.02)NFL	-	M	ATQAHSLSYAGCNFL	R	Acetylation (Protein N-term); Carbamidomethylation	Q9Y2P8	1680.76	15
882	A(+42.01)TQVE(+43.04)PLLPGGATL	-	M	ATQVEPLLPGGATL	L	Acetylation (Protein N-term); ethanolamine (DE)	Q6PKG0	1450.8	14
883	A(+42.01)TQVE(+43.04)PLLPGGATLLQ	-	M	ATQVEPLLPGGATLLQ	A	Acetylation (Protein N-term); ethanolamine (DE)	Q6PKG0	1691.95	16
884	A(+42.01)TQVE(+43.04)PLLPGGATLLQAE(+43.04)E(+43.04)HGGLV	-	M	ATQVEPLLPGGATLLQAEEHGGLV	R	Acetylation (Protein N-term); ethanolamine (DE); ethanolamine (DE); ethanolamine (DE)	Q6PKG0	2570.41	24
885	A(+42.01)TSATSPHAPGFPAE(+43.04)G	-	M	ATSATSPHAPGFPAEG	R	Acetylation (Protein N-term); ethanolamine (DE)	Q9NUP7	1581.74	16
886	A(+42.01)TSGGE(+43.04)E(+43.04)AAAAAPAPGTPATGAD(+43.04)	-	M	ATSGGEEAAAAAPAPGTPATGAD	T	Acetylation (Protein N-term); ethanolamine (DE); ethanolamine (DE); ethanolamine (DE)	Q5T4S7	2111.01	23
887	A(+42.01)TSSE(+43.04)E(+43.04)VLLIV	-	M	ATSSEEVLLIV	K	Acetylation (Protein N-term); ethanolamine (DE); ethanolamine (DE)	P32780	1287.73	11
888	A(+42.01)TSSE(+43.04)E(+43.04)VLLIVK	-	M	ATSSEEVLLIVK	K	Acetylation (Protein N-term); ethanolamine (DE); ethanolamine (DE)	P32780	1415.82	12
889	A(+42.01)TTAAPAGGAR	-	M	ATTAAPAGGAR	N	Acetylation (Protein N-term)	Q9GZM5	984.499	11
890	A(+42.01)TTATM(+15.99)ATSGSA	-	M	ATTATMATSGSA	R	Acetylation (Protein N-term); Oxidation (M)	P38919	1126.48	12
891	A(+42.01)TTATM(+15.99)ATSGSAR	-	M	ATTATMATSGSAR	K	Acetylation (Protein N-term); Oxidation (M)	P38919	1282.58	13
892	A(+42.01)TTATMATSGSA	-	M	ATTATMATSGSA	R	Acetylation (Protein N-term)	P38919	1110.49	12
893	A(+42.01)TTATMATSGSAR	-	M	ATTATMATSGSAR	K	Acetylation (Protein N-term)	P38919	1266.59	13
894	A(+42.01)TVE(+43.04)PE(+43.04)TTPTPNPPTTE(+43.04)E(+43.04)E(+43.04)	-	M	ATVEPETTPTPNPPTTEEE	K	Acetylation (Protein N-term); ethanolamine (DE); ethanolamine (DE); ethanolamine (DE); ethanolamine (DE); more	P06730	2296.14	19
895	A(+42.01)TVE(+43.04)PE(+43.04)TTPTPNPPTTE(+43.04)EE(+43.04)(+43.04)	-	M	ATVEPETTPTPNPPTTEEE	K	Acetylation (Protein N-term); ethanolamine (DE); ethanolamine (DE); ethanolamine (DE); ethanolamine (C-term); more	P06730	2296.14	19
896	A(+42.01)TVQQLE(+43.04)G	-	M	ATVQQLEG	R	Acetylation (Protein N-term); ethanolamine (DE)	Q01469	929.482	8
897	A(+42.01)TVQQLE(+43.04)GR	-	M	ATVQQLEGR	W	Acetylation (Protein N-term); ethanolamine (DE)	Q01469	1085.58	9
898	A(+42.01)TVQQLE(+43.04)GRW	-	M	ATVQQLEGRW	R	Acetylation (Protein N-term); ethanolamine (DE)	Q01469	1271.66	10
899	A(+42.01)TVQQLEGR	-	M	ATVQQLEGR	W	Acetylation (Protein N-term)	Q01469	1042.54	9
900	A(+42.01)TVQQLEGRW	-	M	ATVQQLEGRW	R	Acetylation (Protein N-term)	Q01469	1228.62	10
901	A(+42.01)TVVVE(+43.04)ATE(+43.04)PE(+43.04)PSGSIAN	-	M	ATVVVEATEPEPSGSIAN	P	Acetylation (Protein N-term); ethanolamine (DE); ethanolamine (DE); ethanolamine (DE)	P46821	1941.01	18
902	A(+42.01)TVVVE(+43.04)ATE(+43.04)PE(+43.04)PSGSIANPAASTSPSLSH	-	M	ATVVVEATEPEPSGSIANPAASTSPSLSH	R	Acetylation (Protein N-term); ethanolamine (DE); ethanolamine (DE); ethanolamine (DE)	P46821	2976.5	29
903	A(+42.01)TVVVEATE(+43.04)PE(+43.04)PSGSIANPAASTSPSLSH	-	M	ATVVVEATEPEPSGSIANPAASTSPSLSH	R	Acetylation (Protein N-term); ethanolamine (DE); ethanolamine (DE)	P46821	2933.46	29
904	A(+42.01)TYLE(+43.04)FIQQNE(+43.04)E	-	M	ATYLEFIQQNEE	R	Acetylation (Protein N-term); ethanolamine (DE); ethanolamine (DE)	Q15437	1611.78	12
905	A(+42.01)TYLE(+43.04)FIQQNE(+43.04)E(+43.04)	-	M	ATYLEFIQQNEE	R	Acetylation (Protein N-term); ethanolamine (DE); ethanolamine (DE); ethanolamine (DE)	Q15437	1654.82	12
906	A(+42.01)TYLE(+43.04)FIQQNE(+43.04)E(+43.04)RDGV	-	M	ATYLEFIQQNEERDGV	R	Acetylation (Protein N-term); ethanolamine (DE); ethanolamine (DE); ethanolamine (DE)	Q15437	2082.04	16
907	A(+42.01)TYTC(+57.02)ITC(+57.02)	-	M	ATYTCITC	R	Acetylation (Protein N-term); Carbamidomethylation; Carbamidomethylation	Q969S3	1030.41	8
908	A(+42.01)VAAAAAAAGPAGAGGG	-	M	AVAAAAAAAGPAGAGGG	R	Acetylation (Protein N-term)	Q13884	1251.62	17
909	A(+42.01)VAAAAAAAGPAGAGGGR	-	M	AVAAAAAAAGPAGAGGGR	A	Acetylation (Protein N-term)	Q13884	1407.72	18
910	A(+42.01)VAD(+43.04)LALIPD(+43.04)VD(+43.04)	-	M	AVADLALIPDVD	I	Acetylation (Protein N-term); ethanolamine (DE); ethanolamine (DE); ethanolamine (DE)	Q9NRX4	1381.78	12
911	A(+42.01)VAD(+43.04)LALIPD(+43.04)VD(+43.04)ID(+43.04)	-	M	AVADLALIPDVDID	S	Acetylation (Protein N-term); ethanolamine (DE); ethanolamine (DE); ethanolamine (DE); ethanolamine (DE)	Q9NRX4	1652.93	14
912	A(+42.01)VAD(+43.04)LALIPD(+43.04)VD(+43.04)ID(+43.04)SD(+43.04)	-	M	AVADLALIPDVDIDSD	G	Acetylation (Protein N-term); ethanolamine (DE); ethanolamine (DE); ethanolamine (DE); ethanolamine (DE); more	Q9NRX4	1898.04	16
913	A(+42.01)VAD(+43.04)LALIPD(+43.04)VD(+43.04)ID(+43.04)SDGVF	-	M	AVADLALIPDVDIDSDGVF	K	Acetylation (Protein N-term); ethanolamine (DE); ethanolamine (DE); ethanolamine (DE); ethanolamine (DE)	Q9NRX4	2158.15	19
914	A(+42.01)VAD(+43.04)LALIPD(+43.04)VD(+43.04)IDSD(+43.04)(+43.04)	-	M	AVADLALIPDVDIDSD	G	Acetylation (Protein N-term); ethanolamine (DE); ethanolamine (DE); ethanolamine (DE); ethanolamine (C-term); more	Q9NRX4	1898.04	16
915	A(+42.01)VAE(+43.04)LYTQYN	-	M	AVAELYTQYN	R	Acetylation (Protein N-term); ethanolamine (DE)	Q9NQX4	1255.61	10
916	A(+42.01)VANSSPVNPVVFF	-	M	AVANSSPVNPVVFF	D	Acetylation (Protein N-term)	O43447	1488.76	14
917	A(+42.01)VANSSPVNPVVFFD(+43.04)	-	M	AVANSSPVNPVVFFD	V	Acetylation (Protein N-term); ethanolamine (DE)	O43447	1646.83	15
918	A(+42.01)VANSSPVNPVVFFD(+43.04)V	-	M	AVANSSPVNPVVFFDV	S	Acetylation (Protein N-term); ethanolamine (DE)	O43447	1745.9	16
919	A(+42.01)VAVGRPSNE(+43.04)E(+43.04)L	-	M	AVAVGRPSNEEL	R	Acetylation (Protein N-term); ethanolamine (DE); ethanolamine (DE)	Q9NVA2	1368.74	12
920	A(+42.01)VD(+43.04)SAM(+15.99)E(+43.04)LLFLD(+43.04)TF	-	M	AVDSAMELLFLDTF	K	Acetylation (Protein N-term); ethanolamine (DE); Oxidation (M); ethanolamine (DE); ethanolamine (DE)	Q69YN4	1757.89	14
921	A(+42.01)VE(+43.04)ALHC(+57.02)GLNP	-	M	AVEALHCGLNP	R	Acetylation (Protein N-term); ethanolamine (DE); Carbamidomethylation	Q8N8I0	1264.62	11
922	A(+42.01)VE(+43.04)E(+43.04)LQSII	-	M	AVEELQSII	K	Acetylation (Protein N-term); ethanolamine (DE); ethanolamine (DE)	Q92990	1128.64	9
923	A(+42.01)VE(+43.04)E(+43.04)LQSIIK	-	M	AVEELQSIIK	R	Acetylation (Protein N-term); ethanolamine (DE); ethanolamine (DE)	Q92990	1256.73	10
924	A(+42.01)VE(+43.04)TLSPD(+43.04)WE(+43.04)FD(+43.04)	-	M	AVETLSPDWEFD	R	Acetylation (Protein N-term); ethanolamine (DE); ethanolamine (DE); ethanolamine (DE); ethanolamine (DE)	Q2M389	1621.8	12
925	A(+42.01)VFD(+43.04)TPE(+43.04)E(+43.04)AFGVL	-	M	AVFDTPEEAFGVL	R	Acetylation (Protein N-term); ethanolamine (DE); ethanolamine (DE); ethanolamine (DE)	O43156	1564.81	13
926	A(+42.01)VNVYSTSVTSD(+43.04)	-	M	AVNVYSTSVTSD	N	Acetylation (Protein N-term); ethanolamine (DE)	Q15691	1326.63	12
927	A(+42.01)VNVYSTSVTSD(+43.04)N	-	M	AVNVYSTSVTSDN	L	Acetylation (Protein N-term); ethanolamine (DE)	Q15691	1440.67	13
928	A(+42.01)VNVYSTSVTSD(+43.04)NLS	-	M	AVNVYSTSVTSDNLS	R	Acetylation (Protein N-term); ethanolamine (DE)	Q15691	1640.79	15
929	A(+42.01)VNVYSTSVTSDN	-	M	AVNVYSTSVTSDN	L	Acetylation (Protein N-term)	Q15691	1397.63	13
930	A(+42.01)VNVYSTSVTSDNLS	-	M	AVNVYSTSVTSDNLS	R	Acetylation (Protein N-term)	Q15691	1597.75	15
931	A(+42.01)VNVYSTSVTSE(+43.04)NLS	-	M	AVNVYSTSVTSENLS	R	Acetylation (Protein N-term); ethanolamine (DE)	Q9UPY8	1654.8	15
932	A(+42.01)VPPTYAD(+43.04)LG	-	M	AVPPTYADLG	K	Acetylation (Protein N-term); ethanolamine (DE)	P21796	1087.55	10
933	A(+42.01)VPPTYAD(+43.04)LGK	-	M	AVPPTYADLGK	S	Acetylation (Protein N-term); ethanolamine (DE)	P21796	1215.65	11
934	A(+42.01)VQE(+43.04)SAAQLSM(+15.99)TL	-	M	AVQESAAQLSMTL	K	Acetylation (Protein N-term); ethanolamine (DE); Oxidation (M)	Q7L5Y9	1448.72	13
935	A(+42.01)VQE(+43.04)SAAQLSMTL	-	M	AVQESAAQLSMTL	K	Acetylation (Protein N-term); ethanolamine (DE)	Q7L5Y9	1432.72	13
936	A(+42.01)VSVTPIRD(+43.04)T	-	M	AVSVTPIRDT	K	Acetylation (Protein N-term); ethanolamine (DE)	Q9NR56	1142.63	10
937	A(+42.01)VTLDKD(+43.04)AYY	-	M	AVTLDKDAYY	R	Acetylation (Protein N-term); ethanolamine (DE)	Q9Y5B9	1242.61	10
938	A(+42.01)VVPASLSGQD(+43.04)VGSF	-	M	AVVPASLSGQDVGSF	A	Acetylation (Protein N-term); ethanolamine (DE)	Q9H993	1517.77	15
939	A(+42.01)VVPASLSGQD(+43.04)VGSFAYL	-	M	AVVPASLSGQDVGSFAYL	T	Acetylation (Protein N-term); ethanolamine (DE)	Q9H993	1864.96	18
940	A(+42.01)VWIQAQQLQ	-	M	AVWIQAQQLQ	G	Acetylation (Protein N-term)	P51692	1225.65	10
941	A(+42.01)VWIQAQQLQGE(+43.04)AL	-	M	AVWIQAQQLQGEAL	H	Acetylation (Protein N-term); ethanolamine (DE)	P51692	1638.87	14
942	A(+42.01)YHSFLVE(+43.04)PIS	-	M	AYHSFLVEPIS	C	Acetylation (Protein N-term); ethanolamine (DE)	O15143	1346.69	11
943	A(+42.01)YHSFLVE(+43.04)PISC(+57.02)H	-	M	AYHSFLVEPISCH	A	Acetylation (Protein N-term); ethanolamine (DE); Carbamidomethylation	O15143	1643.78	13
944	A(+42.01)YHSFLVE(+43.04)PISC(+57.02)HAWN	-	M	AYHSFLVEPISCHAWN	K	Acetylation (Protein N-term); ethanolamine (DE); Carbamidomethylation	O15143	2014.94	16
945	A(+42.01)YPGHPGAGG	-	M	AYPGHPGAGG	G	Acetylation (Protein N-term)	P30626	924.409	10
946	A(+42.01)YPGHPGAGGGYYPGGYG	-	M	AYPGHPGAGGGYYPGGYG	G	Acetylation (Protein N-term)	P30626	1738.74	18
947	A(+42.01)YPGHPGAGGGYYPGGYGGAPGGPAFPGQTQ	-	M	AYPGHPGAGGGYYPGGYGGAPGGPAFPGQTQ	D	Acetylation (Protein N-term)	P30626	2904.29	31
948	AAAAVGAGHGAGGPGAASSSGGA	-	M	AAAAVGAGHGAGGPGAASSSGGA	R		Q96K37	1707.79	23
949	AAAE(+43.04)E(+43.04)E(+43.04)DGGPE(+43.04)GPN	-	M	AAAEEEDGGPEGPN	R	ethanolamine (DE); ethanolamine (DE); ethanolamine (DE); ethanolamine (DE)	Q99942	1513.7	14
950	AAAGAAATHLE(+43.04)VA	-	M	AAAGAAATHLEVA	R	ethanolamine (DE)	Q96S52	1194.64	13
951	AAAVAAAGAGE(+43.04)PQSPD(+43.04)E(+43.04)LLP	-	M	AAAVAAAGAGEPQSPDELLP	K	ethanolamine (DE); ethanolamine (DE); ethanolamine (DE)	Q9NS69	1963.04	20
952	AAD(+43.04)ISE(+43.04)SSGAD(+43.04)C(+57.02)	-	M	AADISESSGADC	K	ethanolamine (DE); ethanolamine (DE); ethanolamine (DE); Carbamidomethylation	O43583	1310.58	12
953	AAD(+43.04)TQVSE(+43.04)TL	-	M	AADTQVSETL	K	ethanolamine (DE); ethanolamine (DE)	Q92616	1119.58	10
954	AAGTLYTYPE(+43.04)NW	-	M	AAGTLYTYPENW	R	ethanolamine (DE)	P26641	1427.67	12
955	AAGVE(+43.04)AAAE(+43.04)VAATE(+43.04)I	-	M	AAGVEAAAEVAATEI	K	ethanolamine (DE); ethanolamine (DE); ethanolamine (DE)	P52272	1500.81	15
956	AALAPLPPLPAQF	-	M	AALAPLPPLPAQF	K		Q9NP79	1304.75	13
957	AALRPLVKP	-	M	AALRPLVKP	K		P62910	963.623	9
958	AATE(+43.04)GVGE(+43.04)AAQGGE(+43.04)PGQPAQPPPQPHPPPPQQQH	-	M	AATEGVGEAAQGGEPGQPAQPPPQPHPPPPQQQH	K	ethanolamine (DE); ethanolamine (DE); ethanolamine (DE)	P49354	3515.73	34
959	AD(+43.04)QLTE(+43.04)E(+43.04)QIAE(+43.04)F	-，-，-	M，M，M	ADQLTEEQIAEF	K，K，K	ethanolamine (DE); ethanolamine (DE); ethanolamine (DE); ethanolamine (DE)	P0DP24，P0DP25，P0DP23	1564.81	12
960	AE(+43.04)LVQGQSAPVGM	-	M	AELVQGQSAPVGM	K	ethanolamine (DE)	Q96I24	1328.68	13
961	AE(+43.04)SGE(+43.04)SGGPPGSQD(+43.04)SAAGAE(+43.04)GAGAPAAAASAEP(+43.04)	-	M	AESGESGGPPGSQDSAAGAEGAGAPAAAASAEP	K	ethanolamine (DE); ethanolamine (DE); ethanolamine (DE); ethanolamine (DE); ethanolamine (C-term)	Q9UMX0	2996.41	33
962	AE(+43.04)VQVLVLD(+43.04)G	-	M	AEVQVLVLDG	R	ethanolamine (DE); ethanolamine (DE)	P40429	1127.65	10
963	AGGE(+43.04)AGVTLGQPHLS	-，-	M，M	AGGEAGVTLGQPHLS	R，R	ethanolamine (DE)	P41091，Q2VIR3	1435.74	15
964	AGGGAGD(+43.04)PGLGAAAAPAPE(+43.04)T	-	M	AGGGAGDPGLGAAAAPAPET	R	ethanolamine (DE); ethanolamine (DE)	Q13637	1692.84	20
965	AGGGAGD(+43.04)PGLGAAAAPAPET(+43.04)	-	M	AGGGAGDPGLGAAAAPAPET	R	ethanolamine (DE); ethanolamine (C-term)	Q13637	1692.84	20
966	AGPE(+43.04)SD(+43.04)AQYQFTGI	-	M	AGPESDAQYQFTGI	K	ethanolamine (DE); ethanolamine (DE)	Q96IX5	1568.75	14
967	AGPE(+43.04)SD(+43.04)AQYQFTGIK	-	M	AGPESDAQYQFTGIK	K	ethanolamine (DE); ethanolamine (DE)	Q96IX5	1696.84	15
968	AGSGGLGGGAGGGQGAGAGQG(+43.04)	-	M	AGSGGLGGGAGGGQGAGAGQG	A	ethanolamine (C-term)	Q96QI5	1542.71	21
969	AIC(+57.02)QFFLQG	-	M	AICQFFLQG	R	Carbamidomethylation	O15504	1082.52	9
970	ALSAE(+43.04)TE(+43.04)SHIY	-	M	ALSAETESHIY	R	ethanolamine (DE); ethanolamine (DE)	O14569	1305.66	11
971	ANALASATC(+57.02)E(+43.04)	N，N，-	M，M，M	ANALASATCE	R，R，R	Carbamidomethylation; ethanolamine (DE)	P0CW20，P0CW19，P48059	1049.48	10
972	APAAASPPE(+43.04)VI	-	M	APAAASPPEVI	R	ethanolamine (DE)	O60683	1064.59	11
973	APAE(+43.04)ILNG	-	M	APAEILNG	K	ethanolamine (DE)	P11586	826.455	8
974	APAM(+15.99)QPAE(+43.04)IQFAQ	-	M	APAMQPAEIQFAQ	R	Oxidation (M); ethanolamine (DE)	Q14684	1459.71	13
975	APAMQPAE(+43.04)IQFAQ	-	M	APAMQPAEIQFAQ	R	ethanolamine (DE)	Q14684	1443.72	13
976	APD(+43.04)PVAAE(+43.04)TAAQGPTP	-	M	APDPVAAETAAQGPTP	R	ethanolamine (DE); ethanolamine (DE)	O60427	1577.8	16
977	APE(+43.04)E(+43.04)D(+43.04)AGGE(+43.04)ALGGSFWE(+43.04)AGNY	-	M	APEEDAGGEALGGSFWEAGNY	R	ethanolamine (DE); ethanolamine (DE); ethanolamine (DE); ethanolamine (DE); ethanolamine (DE)	Q9UKS6	2341.1	21
978	APE(+43.04)INLPGPMSLID(+43.04)NT	-	M	APEINLPGPMSLIDNT	K	ethanolamine (DE); ethanolamine (DE)	P32456	1766.92	16
979	APGQLALFSVSD(+43.04)	-	M	APGQLALFSVSD	K	ethanolamine (DE)	P31939	1246.66	12
980	APLD(+43.04)LD(+43.04)KY(+155.14)VE(+43.04)IA	-	M	APLDLDKYVEIA	R	ethanolamine (DE); ethanolamine (DE); EDC(Y); ethanolamine (DE)	O00743	1629.98	12
981	APPAPGPASGGSGE(+43.04)VD(+43.04)	-	M	APPAPGPASGGSGEVD	E	ethanolamine (DE); ethanolamine (DE)	O14579	1450.71	16
982	APPAPGPASGGSGE(+43.04)VD(+43.04)E(+43.04)LFD(+43.04)V	-	M	APPAPGPASGGSGEVDELFDV	K	ethanolamine (DE); ethanolamine (DE); ethanolamine (DE); ethanolamine (DE)	O14579	2140.08	21
983	APPAPGPASGGSGE(+43.04)VD(+43.04)E(+43.04)LFDV(+43.04)	-	M	APPAPGPASGGSGEVDELFDV	K	ethanolamine (DE); ethanolamine (DE); ethanolamine (DE); ethanolamine (C-term)	O14579	2140.08	21
984	APPAPGPASGGSGE(+43.04)VD(+43.04)ELFDV(+43.04)	-	M	APPAPGPASGGSGEVDELFDV	K	ethanolamine (DE); ethanolamine (DE); ethanolamine (C-term)	O14579	2097.04	21
985	APPAPGPASGGSGE(+43.04)VDE(+43.04)LFD(+43.04)V	-	M	APPAPGPASGGSGEVDELFDV	K	ethanolamine (DE); ethanolamine (DE); ethanolamine (DE)	O14579	2097.04	21
986	APPAPGPASGGSGE(+43.04)VDE(+43.04)LFDV(+43.04)	-	M	APPAPGPASGGSGEVDELFDV	K	ethanolamine (DE); ethanolamine (DE); ethanolamine (C-term)	O14579	2097.04	21
987	APPAPGPASGGSGEVD(+43.04)E(+43.04)LFD(+43.04)V	-	M	APPAPGPASGGSGEVDELFDV	K	ethanolamine (DE); ethanolamine (DE); ethanolamine (DE)	O14579	2097.04	21
988	APPAPGPASGGSGEVD(+43.04)E(+43.04)LFDV(+43.04)	-	M	APPAPGPASGGSGEVDELFDV	K	ethanolamine (DE); ethanolamine (DE); ethanolamine (C-term)	O14579	2097.04	21
989	APPSVFAE(+43.04)VPQAQPVLVF	-	M	APPSVFAEVPQAQPVLVF	K	ethanolamine (DE)	P17174	1938.06	18
990	APPWVPAM(+15.99)GF	-	M	APPWVPAMGF	T	Oxidation (M)	P30536	1087.52	10
991	APPWVPAMGF	-	M	APPWVPAMGF	T		P30536	1071.52	10
992	APQMYE(+43.04)FHLPLSPE(+43.04)E(+43.04)LL	-	M	APQMYEFHLPLSPEELL	K	ethanolamine (DE); ethanolamine (DE); ethanolamine (DE)	Q15021	2142.12	17
993	APSTPLLTV	-	M	APSTPLLTV	R		Q9BY44	897.517	9
994	APSVPAAE(+43.04)PE(+43.04)Y(+155.14)PKGI	-	M	APSVPAAEPEYPKGI	R	ethanolamine (DE); ethanolamine (DE); EDC(Y)	P54819	1766.01	15
995	APSVPAAE(+43.04)PE(+43.04)YP	-	M	APSVPAAEPEYP	K	ethanolamine (DE); ethanolamine (DE)	P54819	1312.67	12
996	APVE(+43.04)HVVAD(+43.04)AGAFL	-	M	APVEHVVADAGAFL	R	ethanolamine (DE); ethanolamine (DE)	Q9ULX3	1480.8	14
997	ASRKE(+43.04)GTGSTATSSSSTAGAAG	-	M	ASRKEGTGSTATSSSSTAGAAG	K	ethanolamine (DE)	O15372	1983.95	22
998	ATAAE(+43.04)TSASE(+43.04)PE(+43.04)AE(+43.04)S	-	M	ATAAETSASEPEAES	K	ethanolamine (DE); ethanolamine (DE); ethanolamine (DE); ethanolamine (DE)	Q15020	1621.78	15
999	ATTAAPAGGARNGAGP	-	M	ATTAAPAGGARNGAGP	E		Q9GZM5	1338.66	16
1000	C(+57.02)(+42.01)D(+43.04)FTE(+43.04)D(+43.04)QTAE(+43.04)	-	M	CDFTEDQTAE	F	Carbamidomethylation; Acetylation (Protein N-term); ethanolamine (DE); ethanolamine (DE); ethanolamine (DE); more	P60660	1428.62	10
1001	C(+57.02)(+42.01)D(+43.04)FTE(+43.04)D(+43.04)QTAE(+43.04)F	-	M	CDFTEDQTAEF	K	Carbamidomethylation; Acetylation (Protein N-term); ethanolamine (DE); ethanolamine (DE); ethanolamine (DE); more	P60660	1575.69	11
1002	C(+57.02)(+42.01)D(+43.04)FTE(+43.04)D(+43.04)QTAEF(+43.04)	-	M	CDFTEDQTAEF	K	Carbamidomethylation; Acetylation (Protein N-term); ethanolamine (DE); ethanolamine (DE); ethanolamine (DE); more	P60660	1575.69	11
1003	C(+57.02)(+42.01)D(+43.04)FTE(+43.04)DQTAE(+43.04)F	-	M	CDFTEDQTAEF	K	Carbamidomethylation; Acetylation (Protein N-term); ethanolamine (DE); ethanolamine (DE); ethanolamine (DE)	P60660	1532.65	11
1004	C(+57.02)(+42.01)D(+43.04)FTE(+43.04)DQTAEF(+43.04)	-	M	CDFTEDQTAEF	K	Carbamidomethylation; Acetylation (Protein N-term); ethanolamine (DE); ethanolamine (DE); ethanolamine (C-term)	P60660	1532.65	11
1005	C(+57.02)(+42.01)D(+43.04)FTED(+43.04)QTAE(+43.04)F	-	M	CDFTEDQTAEF	K	Carbamidomethylation; Acetylation (Protein N-term); ethanolamine (DE); ethanolamine (DE); ethanolamine (DE)	P60660	1532.65	11
1006	C(+57.02)(+42.01)D(+43.04)IE(+43.04)E(+43.04)ATNQLLD(+43.04)VNLHE(+43.04)NQ	-	M	CDIEEATNQLLDVNLHENQ	K	Carbamidomethylation; Acetylation (Protein N-term); ethanolamine (DE); ethanolamine (DE); ethanolamine (DE); more	Q9BV44	2511.24	19
1007	C(+57.02)(+42.01)DFTE(+43.04)D(+43.04)QTAE(+43.04)F	-	M	CDFTEDQTAEF	K	Carbamidomethylation; Acetylation (Protein N-term); ethanolamine (DE); ethanolamine (DE); ethanolamine (DE)	P60660	1532.65	11
1008	C(+57.02)(+42.01)QVGE(+43.04)D(+43.04)YGE(+43.04)PAPE(+43.04)E(+43.04)PPPAPRPS	-	M	CQVGEDYGEPAPEEPPPAPRPS	R	Carbamidomethylation; Acetylation (Protein N-term); ethanolamine (DE); ethanolamine (DE); ethanolamine (DE); more	Q2VPK5	2635.27	22
1009	C(+57.02)(+42.01)SLGLFPPPPP	-	M	CSLGLFPPPPP	R	Carbamidomethylation; Acetylation (Protein N-term)	Q9NRG9	1222.61	11
1010	D(+27.99)(+43.04)PNC(+57.02)SC(+57.02)AAGD(+43.04)SC(+57.02)TC(+57.02)AGSC(+57.02)	-	M	DPNCSCAAGDSCTCAGSC	K	Formylation (Protein N-term); ethanolamine (DE); Carbamidomethylation; Carbamidomethylation; ethanolamine (DE); more	P02795	2062.69	18
1011	D(+42.01)(+43.04)D(+43.04)D(+43.04)IAALVVD(+43.04)	-	M	DDDIAALVVD	N	Acetylation (Protein N-term); ethanolamine (DE); ethanolamine (DE); ethanolamine (DE); ethanolamine (DE)	P60709	1258.68	10
1012	D(+42.01)(+43.04)D(+43.04)D(+43.04)IAALVVD(+43.04)N	-	M	DDDIAALVVDN	G	Acetylation (Protein N-term); ethanolamine (DE); ethanolamine (DE); ethanolamine (DE); ethanolamine (DE)	P60709	1372.72	11
1013	D(+42.01)(+43.04)D(+43.04)D(+43.04)IAALVVD(+43.04)NG	-	M	DDDIAALVVDNG	S	Acetylation (Protein N-term); ethanolamine (DE); ethanolamine (DE); ethanolamine (DE); ethanolamine (DE)	P60709	1429.74	12
1014	D(+42.01)(+43.04)D(+43.04)D(+43.04)IAALVVD(+43.04)NGSGM	-	M	DDDIAALVVDNGSGM	C	Acetylation (Protein N-term); ethanolamine (DE); ethanolamine (DE); ethanolamine (DE); ethanolamine (DE)	P60709	1704.84	15
1015	D(+42.01)(+43.04)D(+43.04)D(+43.04)IAALVVD(+43.04)NGSGM(+15.99)	-	M	DDDIAALVVDNGSGM	C	Acetylation (Protein N-term); ethanolamine (DE); ethanolamine (DE); ethanolamine (DE); ethanolamine (DE); more	P60709	1720.83	15
1016	D(+42.01)(+43.04)D(+43.04)D(+43.04)IAALVVD(+43.04)NGSGM(+15.99)C(+57.02)	-	M	DDDIAALVVDNGSGMC	K	Acetylation (Protein N-term); ethanolamine (DE); ethanolamine (DE); ethanolamine (DE); ethanolamine (DE); more	P60709	1880.86	16
1017	D(+42.01)(+43.04)D(+43.04)D(+43.04)IAALVVD(+43.04)NGSGMC(+57.02)	-	M	DDDIAALVVDNGSGMC	K	Acetylation (Protein N-term); ethanolamine (DE); ethanolamine (DE); ethanolamine (DE); ethanolamine (DE); more	P60709	1864.87	16
1018	D(+42.01)(+43.04)D(+43.04)D(+43.04)IAALVVDNGSGMC(+57.02)	-	M	DDDIAALVVDNGSGMC	K	Acetylation (Protein N-term); ethanolamine (DE); ethanolamine (DE); ethanolamine (DE); Carbamidomethylation	P60709	1821.82	16
1019	D(+42.01)(+43.04)D(+43.04)D(+43.04)IAALVVDNGSGMC(+57.02)KAGFAGD(+43.04)D(+43.04)AP	-	M	DDDIAALVVDNGSGMCKAGFAGDDAP	R	Acetylation (Protein N-term); ethanolamine (DE); ethanolamine (DE); ethanolamine (DE); Carbamidomethylation; more	P60709	2837.33	26
1020	D(+42.01)(+43.04)D(+43.04)DIAALVVD(+43.04)	-	M	DDDIAALVVD	N	Acetylation (Protein N-term); ethanolamine (DE); ethanolamine (DE); ethanolamine (DE)	P60709	1215.63	10
1021	D(+42.01)(+43.04)D(+43.04)DIAALVVD(+43.04)NGSGMC(+57.02)	-	M	DDDIAALVVDNGSGMC	K	Acetylation (Protein N-term); ethanolamine (DE); ethanolamine (DE); ethanolamine (DE); Carbamidomethylation	P60709	1821.82	16
1022	D(+42.01)(+43.04)DD(+43.04)IAALVVD(+43.04)N	-	M	DDDIAALVVDN	G	Acetylation (Protein N-term); ethanolamine (DE); ethanolamine (DE); ethanolamine (DE)	P60709	1329.68	11
1023	D(+42.01)DDIAALVVDNGSGMC(+57.02)K	-	M	DDDIAALVVDNGSGMCK	A	Acetylation (Protein N-term); Carbamidomethylation	P60709	1820.79	17
1024	D(+42.01)LQAAGAQAQGAA	-	M	DLQAAGAQAQGAA	E	Acetylation (Protein N-term)	Q9NQ92	1212.57	13
1025	D(+43.04)GIVPD(+43.04)IAVGTK	-	M	DGIVPDIAVGTK	R	ethanolamine (DE); ethanolamine (DE)	P26599	1269.73	12
1026	D(+43.04)PNC(+57.02)SC(+57.02)AAGD(+43.04)SC(+57.02)TC(+57.02)AGSC(+57.02)	-	M	DPNCSCAAGDSCTCAGSC	K	ethanolamine (DE); Carbamidomethylation; Carbamidomethylation; ethanolamine (DE); Carbamidomethylation; more	P02795	2034.7	18
1027	D(+43.04)PNC(+57.02)SC(+57.02)ATGGSC(+57.02)TC(+57.02)AGSC(+57.02)	-	M	DPNCSCATGGSCTCAGSC	K	ethanolamine (DE); Carbamidomethylation; Carbamidomethylation; Carbamidomethylation; Carbamidomethylation; more	P04732	1963.66	18
1028	D(+43.04)PNC(+57.02)SC(+57.02)SPVGSC(+57.02)AC(+57.02)AGSC(+57.02)	-	M	DPNCSCSPVGSCACAGSC	K	ethanolamine (DE); Carbamidomethylation; Carbamidomethylation; Carbamidomethylation; Carbamidomethylation; more	P80297	1987.7	18
1029	E(+42.01)(+43.04)E(+43.04)E(+43.04)IAALVID(+43.04)	-	M	EEEIAALVID	N	Acetylation (Protein N-term); ethanolamine (DE); ethanolamine (DE); ethanolamine (DE); ethanolamine (DE)	P63261	1314.74	10
1030	E(+42.01)(+43.04)E(+43.04)E(+43.04)IAALVID(+43.04)N	-	M	EEEIAALVIDN	G	Acetylation (Protein N-term); ethanolamine (DE); ethanolamine (DE); ethanolamine (DE); ethanolamine (DE)	P63261	1428.78	11
1031	E(+42.01)(+43.04)E(+43.04)E(+43.04)IAALVID(+43.04)NG	-	M	EEEIAALVIDNG	S	Acetylation (Protein N-term); ethanolamine (DE); ethanolamine (DE); ethanolamine (DE); ethanolamine (DE)	P63261	1485.8	12
1032	E(+42.01)(+43.04)E(+43.04)E(+43.04)IAALVID(+43.04)NGSGM	-	M	EEEIAALVIDNGSGM	C	Acetylation (Protein N-term); ethanolamine (DE); ethanolamine (DE); ethanolamine (DE); ethanolamine (DE)	P63261	1760.9	15
1033	E(+42.01)(+43.04)E(+43.04)E(+43.04)IAALVID(+43.04)NGSGM(+15.99)C(+57.02)	-	M	EEEIAALVIDNGSGMC	K	Acetylation (Protein N-term); ethanolamine (DE); ethanolamine (DE); ethanolamine (DE); ethanolamine (DE); more	P63261	1936.92	16
1034	E(+42.01)(+43.04)E(+43.04)E(+43.04)IAALVID(+43.04)NGSGMC(+57.02)	-	M	EEEIAALVIDNGSGMC	K	Acetylation (Protein N-term); ethanolamine (DE); ethanolamine (DE); ethanolamine (DE); ethanolamine (DE); more	P63261	1920.93	16
1035	E(+42.01)(+43.04)E(+43.04)E(+43.04)IAALVIDNGSGMC(+57.02)	-	M	EEEIAALVIDNGSGMC	K	Acetylation (Protein N-term); ethanolamine (DE); ethanolamine (DE); ethanolamine (DE); Carbamidomethylation	P63261	1877.89	16
1036	E(+43.04)D(+43.04)SM(+15.99)D(+43.04)MD(+43.04)MSPL	-	M	EDSMDMDMSPL	R	ethanolamine (DE); ethanolamine (DE); Oxidation (M); ethanolamine (DE); ethanolamine (DE)	P06748	1457.62	11
1037	E(+43.04)D(+43.04)SMD(+43.04)MD(+43.04)M(+15.99)SPL	-	M	EDSMDMDMSPL	R	ethanolamine (DE); ethanolamine (DE); ethanolamine (DE); ethanolamine (DE); Oxidation (M)	P06748	1457.62	11
1038	E(+43.04)D(+43.04)SMD(+43.04)MD(+43.04)MSPL	-	M	EDSMDMDMSPL	R	ethanolamine (DE); ethanolamine (DE); ethanolamine (DE); ethanolamine (DE)	P06748	1441.63	11
1039	E(+43.04)E(+43.04)E(+43.04)IAALVIDNGSGMC(+57.02)	-	M	EEEIAALVIDNGSGMC	K	ethanolamine (DE); ethanolamine (DE); ethanolamine (DE); Carbamidomethylation	P63261	1835.88	16
1040	E(+43.04)E(+43.04)EIAALVIDNGSGMC(+57.02)	-	M	EEEIAALVIDNGSGMC	K	ethanolamine (DE); ethanolamine (DE); Carbamidomethylation	P63261	1792.83	16
1041	E(+43.04)PSSLE(+43.04)LPAD(+43.04)TVQ	-	M	EPSSLELPADTVQ	R	ethanolamine (DE); ethanolamine (DE); ethanolamine (DE)	Q16719	1513.8	13
1042	G(+42.01)AASC(+57.02)E(+43.04)D(+43.04)E(+43.04)E(+43.04)LE(+43.04)F	-	M	GAASCEDEELEF	K	Acetylation (Protein N-term); Carbamidomethylation; ethanolamine (DE); ethanolamine (DE); ethanolamine (DE); more	Q14934	1612.74	12
1043	G(+42.01)APTLPPAWQPFL	-	M	GAPTLPPAWQPFL	K	Acetylation (Protein N-term)	O15392	1435.75	13
1044	G(+42.01)AVTD(+43.04)D(+43.04)E(+43.04)VI	-	M	GAVTDDEVI	R	Acetylation (Protein N-term); ethanolamine (DE); ethanolamine (DE); ethanolamine (DE)	Q6I9Y2	1088.57	9
1045	G(+42.01)D(+43.04)APSPE(+43.04)E(+43.04)	-	M	GDAPSPEE	K	Acetylation (Protein N-term); ethanolamine (DE); ethanolamine (DE); ethanolamine (DE)	P54577	971.456	8
1046	G(+42.01)D(+43.04)ILAHE(+43.04)SE(+43.04)LLGLV	-	M	GDILAHESELLGLV	K	Acetylation (Protein N-term); ethanolamine (DE); ethanolamine (DE); ethanolamine (DE)	Q7Z3E5	1635.92	14
1047	G(+42.01)D(+43.04)TSE(+43.04)D(+43.04)ASIH	-	M	GDTSEDASIH	R	Acetylation (Protein N-term); ethanolamine (DE); ethanolamine (DE); ethanolamine (DE)	Q92620	1201.56	10
1048	G(+42.01)D(+43.04)TVVE(+43.04)PAPL	-	M	GDTVVEPAPL	K	Acetylation (Protein N-term); ethanolamine (DE); ethanolamine (DE)	Q9UBF8	1124.61	10
1049	G(+42.01)D(+43.04)VLSTHLD(+43.04)DA(+43.04)	-	M	GDVLSTHLDDA	R	Acetylation (Protein N-term); ethanolamine (DE); ethanolamine (DE); ethanolamine (C-term)	Q96TA1	1312.66	11
1050	G(+42.01)E(+43.04)AE(+43.04)VGGGGAAGD(+43.04)	-	M	GEAEVGGGGAAGD	K	Acetylation (Protein N-term); ethanolamine (DE); ethanolamine (DE); ethanolamine (DE)	Q9NV56	1216.57	13
1051	G(+42.01)E(+43.04)AGAGAGASGGPE(+43.04)ASPE(+43.04)AE(+43.04)VV	-	M	GEAGAGAGASGGPEASPEAEVV	K	Acetylation (Protein N-term); ethanolamine (DE); ethanolamine (DE); ethanolamine (DE); ethanolamine (DE)	Q9BTY7	2083.02	22
1052	G(+42.01)E(+43.04)HGLE(+43.04)LASMIPAL	-	M	GEHGLELASMIPAL	R	Acetylation (Protein N-term); ethanolamine (DE); ethanolamine (DE)	Q13535	1564.83	14
1053	G(+42.01)E(+43.04)LPLD(+43.04)INIQE(+43.04)P	-	M	GELPLDINIQEP	R	Acetylation (Protein N-term); ethanolamine (DE); ethanolamine (DE); ethanolamine (DE)	Q9BWM7	1507.82	12
1054	G(+42.01)E(+43.04)PQQVSALPPPPMQYI	-	M	GEPQQVSALPPPPMQYI	K	Acetylation (Protein N-term); ethanolamine (DE)	O43513	1935.98	17
1055	G(+42.01)GAVVD(+43.04)E(+43.04)GPTGV	-	M	GGAVVDEGPTGV	K	Acetylation (Protein N-term); ethanolamine (DE); ethanolamine (DE)	O15427	1184.6	12
1056	G(+42.01)LYAAAAGVLAGVE(+43.04)S	-	M	GLYAAAAGVLAGVES	R	Acetylation (Protein N-term); ethanolamine (DE)	Q96P11	1432.76	15
1057	G(+42.01)SE(+43.04)AAQLLE(+43.04)AAD(+43.04)FAA	-	M	GSEAAQLLEAADFAA	R	Acetylation (Protein N-term); ethanolamine (DE); ethanolamine (DE); ethanolamine (DE)	Q8N4P3	1633.83	15
1058	G(+42.01)SE(+43.04)D(+43.04)HGAQNPSC(+57.02)	-	M	GSEDHGAQNPSC	K	Acetylation (Protein N-term); ethanolamine (DE); ethanolamine (DE); Carbamidomethylation	O94953	1385.56	12
1059	G(+42.01)TALVYHE(+43.04)D(+43.04)MTAT	-	M	GTALVYHEDMTAT	R	Acetylation (Protein N-term); ethanolamine (DE); ethanolamine (DE)	Q969S8	1535.73	13
1060	G(+42.01)TTAPGPIHLLE(+43.04)LC(+57.02)D(+43.04)Q	-	M	GTTAPGPIHLLELCDQ	K	Acetylation (Protein N-term); ethanolamine (DE); Carbamidomethylation; ethanolamine (DE)	Q9NQS7	1848.94	16
1061	G(+42.01)TTGLE(+43.04)SLSLGD(+43.04)	-	M	GTTGLESLSLGD	R	Acetylation (Protein N-term); ethanolamine (DE); ethanolamine (DE)	O95243	1276.65	12
1062	G(+42.01)VQVE(+43.04)TISPGD(+43.04)G	-	M	GVQVETISPGDG	R	Acetylation (Protein N-term); ethanolamine (DE); ethanolamine (DE)	P62942	1285.65	12
1063	GC(+57.02)D(+43.04)GGTIPK	-	M	GCDGGTIPK	R	Carbamidomethylation; ethanolamine (DE)	Q9BY42	946.454	9
1064	GE(+43.04)AE(+43.04)VGGGGAAGD(+43.04)	-	M	GEAEVGGGGAAGD	K	ethanolamine (DE); ethanolamine (DE); ethanolamine (DE)	Q9NV56	1174.56	13
1065	GE(+43.04)AGAGAGASGGPE(+43.04)ASPE(+43.04)AE(+43.04)VV	-	M	GEAGAGAGASGGPEASPEAEVV	K	ethanolamine (DE); ethanolamine (DE); ethanolamine (DE); ethanolamine (DE)	Q9BTY7	2041.01	22
1066	GGAVVD(+43.04)E(+43.04)GPTGV	-	M	GGAVVDEGPTGV	K	ethanolamine (DE); ethanolamine (DE)	O15427	1142.59	12
1067	GHQQLYWSHP	-	M	GHQQLYWSHP	R		P62273	1251.58	10
1068	GHQQLYWSHPR	-	M	GHQQLYWSHPR	K		P62273	1407.68	11
1069	GKD(+43.04)YYQTLGLA	-	M	GKDYYQTLGLA	R	ethanolamine (DE)	P25685	1270.66	11
1070	GLLSQGSPLSWE(+43.04)E(+43.04)T	-	M	GLLSQGSPLSWEET	K	ethanolamine (DE); ethanolamine (DE)	P48506	1588.81	14
1071	GLLSQGSPLSWE(+43.04)E(+43.04)TK	-	M	GLLSQGSPLSWEETK	R	ethanolamine (DE); ethanolamine (DE)	P48506	1716.9	15
1072	GPGPPAAGAAPSPRPLSLVA	-	M	GPGPPAAGAAPSPRPLSLVA	R		Q6NUT3	1781.98	20
1073	GPPGPALPATM(+15.99)NNSSSE(+43.04)T	-	M	GPPGPALPATMNNSSSET	R	Oxidation (M); ethanolamine (DE)	Q15003	1785.82	18
1074	GPPGPALPATMNNSSSE(+43.04)T	-	M	GPPGPALPATMNNSSSET	R	ethanolamine (DE)	Q15003	1769.83	18
1075	GQND(+43.04)LM(+15.99)GTAE(+43.04)D(+43.04)FAD(+43.04)QFL	-	M	GQNDLMGTAEDFADQFL	R	ethanolamine (DE); Oxidation (M); ethanolamine (DE); ethanolamine (DE); ethanolamine (DE)	O15260	2058.97	17
1076	GRVQLFE(+43.04)ISLSHG	-	M	GRVQLFEISLSHG	R	ethanolamine (DE)	Q8N5I2	1484.81	13
1077	GVQGFQD(+43.04)YIE(+43.04)	-	M	GVQGFQDYIE	K	ethanolamine (DE); ethanolamine (DE)	Q9NZB2	1240.61	10
1078	GVQVE(+43.04)TISPGD(+43.04)	-	M	GVQVETISPGD	G	ethanolamine (DE); ethanolamine (DE)	P62942	1186.62	11
1079	GVQVE(+43.04)TISPGD(+43.04)G	-	M	GVQVETISPGDG	R	ethanolamine (DE); ethanolamine (DE)	P62942	1243.64	12
1080	GVQVE(+43.04)TISPGDG	-	M	GVQVETISPGDG	R	ethanolamine (DE)	P62942	1200.6	12
1081	GVTC(+57.02)VSQM(+15.99)PVAE(+43.04)G	-	M	GVTCVSQMPVAEG	K	Carbamidomethylation; Oxidation (M); ethanolamine (DE)	Q9H944	1392.64	13
1082	GVTC(+57.02)VSQMPVAE(+43.04)G	-	M	GVTCVSQMPVAEG	K	Carbamidomethylation; ethanolamine (DE)	Q9H944	1376.64	13
1083	K(+27.99)SSQTFEEQT	-	M	KSSQTFEEQT	E	Formylation (Protein N-term)	Q5TBC7	1211.53	10
1084	K(+27.99)VTVC(+57.02)FGRTGIVVPC(+57.02)	-	M	KVTVCFGRTGIVVPC	K	Formylation (Protein N-term); Carbamidomethylation; Carbamidomethylation	Q8TEW8	1719.88	15
1085	K(+42.01)GSRIELGD(+43.04)VTPHNI	-	M	KGSRIELGDVTPHNI	K	Acetylation (Protein N-term); ethanolamine (DE)	Q9GZZ1	1719.93	15
1086	KALILVGGYGT	-	M	KALILVGGYGT	R		Q9Y5P6	1090.64	11
1087	KALLALPL	-	M	KALLALPL	L		P55083	837.569	8
1088	KC(+57.02)HYE(+43.04)ALGVR	-	M	KCHYEALGVR	R	Carbamidomethylation; ethanolamine (DE)	Q5F1R6	1274.66	10
1089	KE(+43.04)TPLSNC(+57.02)E(+43.04)	-	M	KETPLSNCE	R	ethanolamine (DE); Carbamidomethylation; ethanolamine (DE)	Q06265	1162.57	9
1090	KFNPFVTSD(+43.04)	-，-	M，M	KFNPFVTSD	R，R	ethanolamine (DE)	P61254，Q9UNX3	1096.56	9
1091	KFNPFVTSD(+43.04)R	-，-	M，M	KFNPFVTSDR	S，S	ethanolamine (DE)	P61254，Q9UNX3	1252.66	10
1092	KFNPFVTSD(+43.04)RS	-，-	M，M	KFNPFVTSDRS	K，K	ethanolamine (DE)	P61254，Q9UNX3	1339.69	11
1093	KHY(+155.14)E(+43.04)VE(+43.04)ILD(+43.04)A	-	M	KHYEVEILDA	K	EDC(Y); ethanolamine (DE); ethanolamine (DE); ethanolamine (DE)	Q9NZ01	1499.88	10
1094	KHYE(+43.04)VE(+43.04)ILD(+43.04)A	-	M	KHYEVEILDA	K	ethanolamine (DE); ethanolamine (DE); ethanolamine (DE)	Q9NZ01	1344.74	10
1095	KIFSE(+43.04)SH	-	M	KIFSESH	K	ethanolamine (DE)	Q9NVM9	889.466	7
1096	KIFVGNVD(+43.04)GAD(+43.04)TTPE(+43.04)E(+43.04)L	-	M	KIFVGNVDGADTTPEEL	A	ethanolamine (DE); ethanolamine (DE); ethanolamine (DE); ethanolamine (DE)	Q96PK6	1976.06	17
1097	KIFVGNVD(+43.04)GAD(+43.04)TTPE(+43.04)E(+43.04)LA	-	M	KIFVGNVDGADTTPEELA	A	ethanolamine (DE); ethanolamine (DE); ethanolamine (DE); ethanolamine (DE)	Q96PK6	2047.1	18
1098	KIGSGFLSGGGGTGSSGGSGSGGGGSGGGGGGGSSGR	-	M	KIGSGFLSGGGGTGSSGGSGSGGGGSGGGGGGGSSGR	R		Q9Y2X9	2814.25	37
1099	KKFFQE(+43.04)F	-	M	KKFFQEF	K	ethanolamine (DE)	Q9BZV1	1015.55	7
1100	KLIILE(+43.04)HYSQASE(+43.04)WAA	-	M	KLIILEHYSQASEWAA	K	ethanolamine (DE); ethanolamine (DE)	P46926	1944.05	16
1101	KLLTHNLLSSHV	-	M	KLLTHNLLSSHV	R		Q9UI30	1360.78	12
1102	KLNISFPATGC(+57.02)Q	-	M	KLNISFPATGCQ	K	Carbamidomethylation	P62753	1334.67	12
1103	KLYC(+57.02)LSGHPT	-	M	KLYCLSGHPT	L	Carbamidomethylation	Q9NV88	1174.58	10
1104	KPLVVFVLGGPGAG	-	M	KPLVVFVLGGPGAG	K		P30085	1309.78	14
1105	KPRPAGFVD(+43.04)N	-	M	KPRPAGFVDN	K	ethanolamine (DE)	O15381	1142.62	10
1106	KQLPVLE(+43.04)PGD(+43.04)	-	M	KQLPVLEPGD	K	ethanolamine (DE); ethanolamine (DE)	Q7Z6M1	1180.68	10
1107	KQLPVLE(+43.04)PGD(+43.04)KP	-	M	KQLPVLEPGDKP	R	ethanolamine (DE); ethanolamine (DE)	Q7Z6M1	1405.83	12
1108	KQLPVLE(+43.04)PGD(+43.04)KPR	-	M	KQLPVLEPGDKPR	K	ethanolamine (DE); ethanolamine (DE)	Q7Z6M1	1561.93	13
1109	KQLPVLEPGD	-	M	KQLPVLEPGD	K		Q7Z6M1	1094.6	10
1110	KSVIYHALSQ	-	M	KSVIYHALSQ	K		O95707	1144.62	10
1111	KTILSNQTVD(+43.04)IPE(+43.04)NVD(+43.04)ITL	-	M	KTILSNQTVDIPENVDITL	K	ethanolamine (DE); ethanolamine (DE); ethanolamine (DE)	P32969	2241.26	19
1112	KTPNAQE(+43.04)AE(+43.04)GQQT	-，-	M，M	KTPNAQEAEGQQT	R，R	ethanolamine (DE); ethanolamine (DE)	Q99865，Q9BPZ2	1486.74	13
1113	KVE(+43.04)LC(+57.02)SF	-	M	KVELCSF	S	ethanolamine (DE); Carbamidomethylation	P83731	924.474	7
1114	KVE(+43.04)LC(+57.02)SFSGY	-	M	KVELCSFSGY	K	ethanolamine (DE); Carbamidomethylation	P83731	1231.59	10
1115	KVE(+43.04)LC(+57.02)SFSGY(+155.14)	-	M	KVELCSFSGY	K	ethanolamine (DE); Carbamidomethylation; EDC(Y)	P83731	1386.73	10
1116	KYILVTGGVISGIG	-，-	M，M	KYILVTGGVISGIG	K，K		Q9NRF8，P17812	1375.81	14
1117	M(+15.99)AAAATAAEGVPS	-	-	MAAAATAAEGVPS	R	Oxidation (M)	Q8TBC3	1161.53	13
1118	M(+15.99)AALGHLAGEAAA	-	-	MAALGHLAGEAAA	A	Oxidation (M)	Q9H7E9	1197.58	13
1119	M(+15.99)APGQLALFSVSD(+43.04)	-	-	MAPGQLALFSVSD	K	Oxidation (M); ethanolamine (DE)	P31939	1393.69	13
1120	M(+15.99)ASGVQVADEVC(+57.02)	-	-	MASGVQVADEVC	R	Oxidation (M); Carbamidomethylation	P60981	1280.54	12
1121	M(+15.99)C(+57.02)GAPSATQPATAE(+43.04)TQHIAD(+43.04)QV	-	M	MCGAPSATQPATAETQHIADQV	R	Oxidation (M); Carbamidomethylation; ethanolamine (DE); ethanolamine (DE)	P04080	2385.11	22
1122	M(+15.99)D(+43.04)PNC(+57.02)SC(+57.02)AAGD(+43.04)	-	-	MDPNCSCAAGD	S	Oxidation (M); ethanolamine (DE); Carbamidomethylation; Carbamidomethylation; ethanolamine (DE)	P02795	1298.47	11
1123	M(+15.99)D(+43.04)PNC(+57.02)SC(+57.02)AAGD(+43.04)SC(+57.02)TC(+57.02)AGSC(+57.02)	-	-	MDPNCSCAAGDSCTCAGSC	K	Oxidation (M); ethanolamine (DE); Carbamidomethylation; Carbamidomethylation; ethanolamine (DE); more	P02795	2181.73	19
1124	M(+15.99)D(+43.04)PNC(+57.02)SC(+57.02)AAGDSC(+57.02)TC(+57.02)AGSC(+57.02)	-	-	MDPNCSCAAGDSCTCAGSC	K	Oxidation (M); ethanolamine (DE); Carbamidomethylation; Carbamidomethylation; Carbamidomethylation; more	P02795	2138.69	19
1125	M(+15.99)D(+43.04)PNC(+57.02)SC(+57.02)ATGGSC(+57.02)TC(+57.02)AGSC(+57.02)	-	-	MDPNCSCATGGSCTCAGSC	K	Oxidation (M); ethanolamine (DE); Carbamidomethylation; Carbamidomethylation; Carbamidomethylation; more	P04732	2110.69	19
1126	M(+15.99)D(+43.04)PNC(+57.02)SC(+57.02)SPVGSC(+57.02)AC(+57.02)AGSC(+57.02)	-	-	MDPNCSCSPVGSCACAGSC	K	Oxidation (M); ethanolamine (DE); Carbamidomethylation; Carbamidomethylation; Carbamidomethylation; more	P80297	2134.73	19
1127	M(+15.99)DHY(+155.14)DSQQTNDYMQPE(+43.04)E(+43.04)D(+43.04)WD(+43.04)	-	-	MDHYDSQQTNDYMQPEEDWD	R	Oxidation (M); EDC(Y); ethanolamine (DE); ethanolamine (DE); ethanolamine (DE); more	P12814	2889.23	20
1128	M(+15.99)DPNC(+57.02)SC(+57.02)AAGVSC(+57.02)TC(+57.02)AGSC(+57.02)	-	-	MDPNCSCAAGVSCTCAGSC	K	Oxidation (M); Carbamidomethylation; Carbamidomethylation; Carbamidomethylation; Carbamidomethylation; more	P04733	2079.69	19
1129	M(+15.99)E(+43.04)GPGLGSQC(+57.02)	-	-	MEGPGLGSQC	R	Oxidation (M); ethanolamine (DE); Carbamidomethylation	Q8IUH4	1093.45	10
1130	M(+15.99)E(+43.04)GVEEKKKEVPAVPE(+43.04)TL	-	-	MEGVEEKKKEVPAVPETL	K	Oxidation (M); ethanolamine (DE); ethanolamine (DE)	P18124	2114.13	18
1131	M(+15.99)EGVEEKKKE(+43.04)VPAVPE(+43.04)TL	-	-	MEGVEEKKKEVPAVPETL	K	Oxidation (M); ethanolamine (DE); ethanolamine (DE)	P18124	2114.13	18
1132	M(+15.99)ELEDGVVY(+155.14)QE(+43.04)E(+43.04)PGGSGAVMSE(+43.04)	-	-	MELEDGVVYQEEPGGSGAVMSE	R	Oxidation (M); EDC(Y); ethanolamine (DE); ethanolamine (DE); ethanolamine (DE)	O60271	2612.25	22
1133	M(+15.99)FFTC(+57.02)GPNE(+43.04)AM(+15.99)VVSGFC(+57.02)	-	-	MFFTCGPNEAMVVSGFC	R	Oxidation (M); Carbamidomethylation; ethanolamine (DE); Oxidation (M); Carbamidomethylation	O75955	2027.83	17
1134	M(+15.99)GPLQGDGGPAL	-	-	MGPLQGDGGPAL	G	Oxidation (M)	Q9H1D0	1127.53	12
1135	M(+15.99)IGGLFIYNH	-	-	MIGGLFIYNH	K	Oxidation (M)	Q96CW1	1179.57	10
1136	M(+15.99)IIPSLE(+43.04)E(+43.04)LD(+43.04)SL	-	-	MIIPSLEELDSL	K	Oxidation (M); ethanolamine (DE); ethanolamine (DE); ethanolamine (DE)	Q9BXS6	1503.82	12
1137	M(+15.99)ITSAAGIISLLD(+43.04)E(+43.04)D(+43.04)E(+43.04)PQL	-	-	MITSAAGIISLLDEDEPQL	K	Oxidation (M); ethanolamine (DE); ethanolamine (DE); ethanolamine (DE); ethanolamine (DE)	Q99460	2203.18	19
1138	M(+15.99)KE(+43.04)TPLSNC(+57.02)E(+43.04)	-	-	MKETPLSNCE	R	Oxidation (M); ethanolamine (DE); Carbamidomethylation; ethanolamine (DE)	Q06265	1309.6	10
1139	M(+15.99)KFNPFVTSD(+43.04)	-，-	-，-	MKFNPFVTSD	R，R	Oxidation (M); ethanolamine (DE)	P61254，Q9UNX3	1243.59	10
1140	M(+15.99)KHY(+155.14)E(+43.04)VE(+43.04)ILD(+43.04)A	-	-	MKHYEVEILDA	K	Oxidation (M); EDC(Y); ethanolamine (DE); ethanolamine (DE); ethanolamine (DE)	Q9NZ01	1646.92	11
1141	M(+15.99)KHY(+155.14)E(+43.04)VE(+43.04)ILDA(+43.04)	-	-	MKHYEVEILDA	K	Oxidation (M); EDC(Y); ethanolamine (DE); ethanolamine (DE); ethanolamine (C-term)	Q9NZ01	1646.92	11
1142	M(+15.99)KHYE(+43.04)VE(+43.04)ILD(+43.04)A	-	-	MKHYEVEILDA	K	Oxidation (M); ethanolamine (DE); ethanolamine (DE); ethanolamine (DE)	Q9NZ01	1491.78	11
1143	M(+15.99)KLLTHNLLSSHV	-	-	MKLLTHNLLSSHV	R	Oxidation (M)	Q9UI30	1507.82	13
1144	M(+15.99)KLNISFPATGC(+57.02)Q	-	-	MKLNISFPATGCQ	K	Oxidation (M); Carbamidomethylation	P62753	1481.7	13
1145	M(+15.99)KPD(+43.04)E(+43.04)TPMFD(+43.04)PSLL	-	-	MKPDETPMFDPSLL	K	Oxidation (M); ethanolamine (DE); ethanolamine (DE); ethanolamine (DE)	Q96EK6	1764.88	14
1146	M(+15.99)KPILLQGHE(+43.04)	-	-	MKPILLQGHE	R	Oxidation (M); ethanolamine (DE)	Q13347	1223.67	10
1147	M(+15.99)KPLVVFVLGGPGAG	-	-	MKPLVVFVLGGPGAG	K	Oxidation (M)	P30085	1456.81	15
1148	M(+15.99)KPPAAC(+57.02)AGD(+43.04)M(+15.99)AD(+43.04)AASPC(+57.02)SVVNDL(+43.04)	-	-	MKPPAACAGDMADAASPCSVVNDL	R	Oxidation (M); Carbamidomethylation; ethanolamine (DE); Oxidation (M); ethanolamine (DE); more	P52888	2608.18	24
1149	M(+15.99)KPRPAGFVD(+43.04)N	-	-	MKPRPAGFVDN	K	Oxidation (M); ethanolamine (DE)	O15381	1289.65	11
1150	M(+15.99)KTILSNQTVD(+43.04)IPE(+43.04)NVD(+43.04)ITL	-	-	MKTILSNQTVDIPENVDITL	K	Oxidation (M); ethanolamine (DE); ethanolamine (DE); ethanolamine (DE)	P32969	2388.29	20
1151	M(+15.99)KVE(+43.04)LC(+57.02)SFSGY	-	-	MKVELCSFSGY	K	Oxidation (M); ethanolamine (DE); Carbamidomethylation	P83731	1378.63	11
1152	M(+15.99)LIE(+43.04)D(+43.04)VD(+43.04)AL	-	-	MLIEDVDAL	K	Oxidation (M); ethanolamine (DE); ethanolamine (DE); ethanolamine (DE)	Q9P2N5	1162.63	9
1153	M(+15.99)LLPNILLTGTPGVG	-	-	MLLPNILLTGTPGVG	K	Oxidation (M)	Q9Y3D8	1510.84	15
1154	M(+15.99)LQQVPE(+43.04)NINFPAE(+43.04)EE(+43.04)(+43.04)	-	-	MLQQVPENINFPAEEE	K	Oxidation (M); ethanolamine (DE); ethanolamine (DE); ethanolamine (C-term); ethanolamine (DE)	P41252	2075.04	16
1155	M(+15.99)LSLD(+43.04)FLD(+43.04)D(+43.04)V	-	-	MLSLDFLDDV	R	Oxidation (M); ethanolamine (DE); ethanolamine (DE); ethanolamine (DE)	P67812	1311.67	10
1156	M(+15.99)PPYTVVYFPV	-	-	MPPYTVVYFPV	R	Oxidation (M)	P09211	1327.65	11
1157	M(+15.99)PVPPPPPPPLPP	-	-	MPVPPPPPPPLPP	P	Oxidation (M)	A6NGB9	1347.73	13
1158	M(+15.99)PYQYPALTPE(+43.04)Q	-	-	MPYQYPALTPEQ	K	Oxidation (M); ethanolamine (DE)	P04075	1495.7	12
1159	M(+15.99)QD(+43.04)AE(+43.04)NVAVPE(+43.04)AAE(+43.04)E(+43.04)	-	-	MQDAENVAVPEAAEE	R	Oxidation (M); ethanolamine (DE); ethanolamine (DE); ethanolamine (DE); ethanolamine (DE); more	P55884	1832.89	15
1160	M(+15.99)RE(+43.04)C(+57.02)ISIHVGQ	-，-，-，-，-，-	-，-，-，-，-，-	MRECISIHVGQ	A，A，A，A，A，A	Oxidation (M); ethanolamine (DE); Carbamidomethylation	P0DPH7，Q71U36，Q9BQE3，P0DPH8，Q6PEY2，P68363	1387.67	11
1161	M(+15.99)RE(+43.04)IVHIQAGQC(+57.02)GNQIGA	-，-，-，-	-，-，-，-	MREIVHIQAGQCGNQIGA	K，K，K，K	Oxidation (M); ethanolamine (DE); Carbamidomethylation	Q13885，P07437，Q9BVA1，Q13509	2040	18
1162	M(+15.99)RE(+43.04)IVHIQAGQC(+57.02)GNQIGT	-	-	MREIVHIQAGQCGNQIGT	K	Oxidation (M); ethanolamine (DE); Carbamidomethylation	Q9BUF5	2070.01	18
1163	M(+15.99)RE(+43.04)IVHLQAGQC(+57.02)GNQIGA	-，-	-，-	MREIVHLQAGQCGNQIGA	K，K	Oxidation (M); ethanolamine (DE); Carbamidomethylation	P04350，P68371	2040	18
1164	M(+15.99)RYVASYLLAALGGNSSPSA	-	-	MRYVASYLLAALGGNSSPSA	K	Oxidation (M)	P05387	2043.01	20
1165	M(+15.99)SEQTPAEAGAAGA	-	-	MSEQTPAEAGAAGA	R	Oxidation (M)	O94913	1305.55	14
1166	M(+15.99)SLWGLVSKM(+15.99)PPE(+43.04)KVQ	-	-	MSLWGLVSKMPPEKVQ	R	Oxidation (M); Oxidation (M); ethanolamine (DE)	P42226	1903.99	16
1167	M(+15.99)STGTFVVSQPLNY	-	-	MSTGTFVVSQPLNY	R	Oxidation (M)	P49189	1558.73	14
1168	M(+15.99)VGGGGVGGGLLE(+43.04)NANPLIYQ	-	-	MVGGGGVGGGLLENANPLIYQ	R	Oxidation (M); ethanolamine (DE)	Q9Y3D0	2074.05	21
1169	M(+15.99)VGQLSE(+43.04)GAIAAIMQ	-	-	MVGQLSEGAIAAIMQ	K	Oxidation (M); ethanolamine (DE)	P27694	1576.8	15
1170	M(+15.99)VGRGVPLC(+57.02)AAQPAVAEGGPA(+43.04)	-	-	MVGRGVPLCAAQPAVAEGGPA	R	Oxidation (M); Carbamidomethylation; ethanolamine (C-term)	Q9ULI4	2066.04	21
1171	M(+15.99)VLLE(+43.04)SE(+43.04)QFLTE(+43.04)LT	-	-	MVLLESEQFLTELT	R	Oxidation (M); ethanolamine (DE); ethanolamine (DE); ethanolamine (DE)	P37108	1796.96	14
1172	M(+15.99)VNFTVD(+43.04)QI	-	-	MVNFTVDQI	R	Oxidation (M); ethanolamine (DE)	P13639	1124.55	9
1173	M(+15.99)VPPVQVSPLI	-	-	MVPPVQVSPLI	K	Oxidation (M)	P56385	1194.67	11
1174	M(+15.99)WLAAAAPSLA	-，-	-，-	MWLAAAAPSLA	R，R	Oxidation (M)	A6NEC2，P55786	1116.56	11
1175	M(+27.99)(+15.99)AVAVRTLQEQLE(+43.04)	-	-	MAVAVRTLQEQLE	K	Formylation (Protein N-term); Oxidation (M); ethanolamine (DE)	Q9H307	1573.81	13
1176	M(+27.99)(+15.99)AVLLE(+43.04)TTLGDV	-	-	MAVLLETTLGDV	V	Formylation (Protein N-term); Oxidation (M); ethanolamine (DE)	Q8WUA2	1347.7	12
1177	M(+27.99)(+15.99)D(+43.04)PNC(+57.02)SC(+57.02)AAGVSC(+57.02)TC(+57.02)AGSC(+57.02)	-	-	MDPNCSCAAGVSCTCAGSC	K	Formylation (Protein N-term); Oxidation (M); ethanolamine (DE); Carbamidomethylation; Carbamidomethylation; more	P04733	2150.73	19
1178	M(+27.99)(+15.99)DPNC(+57.02)SC(+57.02)AAGD(+43.04)SC(+57.02)TC(+57.02)AGSC(+57.02)	-	-	MDPNCSCAAGDSCTCAGSC	K	Formylation (Protein N-term); Oxidation (M); Carbamidomethylation; Carbamidomethylation; ethanolamine (DE); more	P02795	2166.68	19
1179	M(+27.99)(+15.99)DPNC(+57.02)SC(+57.02)AAGDSC(+57.02)TC(+57.02)AGSC(+57.02)	-	-	MDPNCSCAAGDSCTCAGSC	K	Formylation (Protein N-term); Oxidation (M); Carbamidomethylation; Carbamidomethylation; Carbamidomethylation; more	P02795	2123.64	19
1180	M(+27.99)(+15.99)E(+43.04)GPLSVFGD(+43.04)	-	-	MEGPLSVFGD	R	Formylation (Protein N-term); Oxidation (M); ethanolamine (DE); ethanolamine (DE)	P17987	1180.54	10
1181	M(+27.99)(+15.99)E(+43.04)PE(+43.04)PE(+43.04)PAAVE(+43.04)VPAG	-	-	MEPEPEPAAVEVPAG	R	Formylation (Protein N-term); Oxidation (M); ethanolamine (DE); ethanolamine (DE); ethanolamine (DE); more	Q7Z6J9	1737.86	15
1182	M(+27.99)(+15.99)E(+43.04)SQGVPPGPY	-	-	MESQGVPPGPY	R	Formylation (Protein N-term); Oxidation (M); ethanolamine (DE)	Q5TB30	1247.55	11
1183	M(+27.99)(+15.99)E(+43.04)TM(+15.99)ASPGKD(+43.04)NY	-	-	METMASPGKDNY	R	Formylation (Protein N-term); Oxidation (M); ethanolamine (DE); Oxidation (M); ethanolamine (DE)	O60684	1488.62	12
1184	M(+27.99)(+15.99)GAQGAQESI	-	-	MGAQGAQESI	K	Formylation (Protein N-term); Oxidation (M)	Q96DA0	1034.43	10
1185	M(+27.99)(+15.99)GRAAATAGGGGGA(+43.04)	-	-	MGRAAATAGGGGGA	R	Formylation (Protein N-term); Oxidation (M); ethanolamine (C-term)	Q6UXZ4	1190.55	14
1186	M(+27.99)(+15.99)IFPVARYAL	-	-	MIFPVARYAL	R	Formylation (Protein N-term); Oxidation (M)	Q13472	1223.64	10
1187	M(+27.99)(+15.99)SDY(+155.14)STGGPPPGPPPPAGGGGGAGGA	-	-	MSDYSTGGPPPGPPPPAGGGGGAGGA	G	Formylation (Protein N-term); Oxidation (M); EDC(Y)	Q92945	2364.08	26
1188	M(+27.99)AKLYEAVTF(+43.04)	-	-	MAKLYEAVTF	K	Formylation (Protein N-term); ethanolamine (C-term)	Q9UK12	1242.63	10
1189	M(+27.99)APSADPGMS	-	-	MAPSADPGMS	R	Formylation (Protein N-term)	Q9NQ79	990.379	10
1190	M(+27.99)D(+43.04)PNC(+57.02)SC(+57.02)AAGD(+43.04)SC(+57.02)TC(+57.02)AGSC(+57.02)	-	-	MDPNCSCAAGDSCTCAGSC	K	Formylation (Protein N-term); ethanolamine (DE); Carbamidomethylation; Carbamidomethylation; ethanolamine (DE); more	P02795	2193.73	19
1191	M(+27.99)D(+43.04)PNC(+57.02)SC(+57.02)AAGVSC(+57.02)TC(+57.02)AGSC(+57.02)	-	-	MDPNCSCAAGVSCTCAGSC	K	Formylation (Protein N-term); ethanolamine (DE); Carbamidomethylation; Carbamidomethylation; Carbamidomethylation; more	P04733	2134.73	19
1192	M(+27.99)DPNC(+57.02)SC(+57.02)AAGD(+43.04)SC(+57.02)TC(+57.02)AGSC(+57.02)	-	-	MDPNCSCAAGDSCTCAGSC	K	Formylation (Protein N-term); Carbamidomethylation; Carbamidomethylation; ethanolamine (DE); Carbamidomethylation; more	P02795	2150.69	19
1193	M(+27.99)DPNC(+57.02)SC(+57.02)TTGGSC(+57.02)AC(+57.02)AGSC(+57.02)(+43.04)	-	-	MDPNCSCTTGGSCACAGSC	K	Formylation (Protein N-term); Carbamidomethylation; Carbamidomethylation; Carbamidomethylation; Carbamidomethylation; more	P07438	2122.69	19
1194	M(+27.99)EEVVIAGM(+15.99)SG	-	-	MEEVVIAGMSG	K	Formylation (Protein N-term); Oxidation (M)	P49327	1165.5	11
1195	M(+27.99)GGLSARPTAG	-	-	MGGLSARPTAG	R	Formylation (Protein N-term)	Q92782	1044.5	11
1196	M(+27.99)LLAPQGRSFS	-	-	MLLAPQGRSFS	K	Formylation (Protein N-term)	Q8NCU4	1233.62	11
1197	M(+27.99)LRTILDAPQ	-	-	MLRTILDAPQ	R	Formylation (Protein N-term)	P54219	1184.62	10
1198	M(+27.99)M(+15.99)QGE(+43.04)AHPSASLID(+43.04)	-	-	MMQGEAHPSASLID	R	Formylation (Protein N-term); Oxidation (M); ethanolamine (DE); ethanolamine (DE)	Q96SK2	1615.73	14
1199	M(+27.99)MLGPE(+43.04)GGE(+43.04)GFVV	-	-	MMLGPEGGEGFVV	K	Formylation (Protein N-term); ethanolamine (DE); ethanolamine (DE)	P52597	1435.68	13
1200	M(+27.99)PMFIVNTNVP	-	-	MPMFIVNTNVP	R	Formylation (Protein N-term)	P14174	1289.61	11
1201	M(+27.99)SEPGGGGGE(+43.04)DGSAGL	-	-	MSEPGGGGGEDGSAGL	E	Formylation (Protein N-term); ethanolamine (DE)	Q14204	1447.59	16
1202	M(+27.99)SWLFGVN	-	-	MSWLFGVN	K	Formylation (Protein N-term)	Q5T9A4	980.443	8
1203	M(+27.99)VSLPPPQSDVTLPGPT(+43.04)	-	-	MVSLPPPQSDVTLPGPT	R	Formylation (Protein N-term); ethanolamine (C-term)	O15353	1805.92	17
1204	M(+42.01)(+15.99)APAE(+43.04)ILNG	-	-	MAPAEILNG	K	Acetylation (Protein N-term); Oxidation (M); ethanolamine (DE)	P11586	1015.5	9
1205	M(+42.01)(+15.99)APD(+43.04)PVAAE(+43.04)TAAQGPTP	-	-	MAPDPVAAETAAQGPTP	R	Acetylation (Protein N-term); Oxidation (M); ethanolamine (DE); ethanolamine (DE)	O60427	1766.85	17
1206	M(+42.01)(+15.99)APD(+43.04)SD(+43.04)PFPE(+43.04)GPLL	-	-	MAPDSDPFPEGPLL	K	Acetylation (Protein N-term); Oxidation (M); ethanolamine (DE); ethanolamine (DE); ethanolamine (DE)	Q9BVQ7	1671.82	14
1207	M(+42.01)(+15.99)APE(+43.04)E(+43.04)NAGTE(+43.04)LLLQSFE(+43.04)	-	-	MAPEENAGTELLLQSFE	R	Acetylation (Protein N-term); Oxidation (M); ethanolamine (DE); ethanolamine (DE); ethanolamine (DE); more	Q96G04	2108.05	17
1208	M(+42.01)(+15.99)APE(+43.04)INLPGPMSLID(+43.04)NT	-	-	MAPEINLPGPMSLIDNT	K	Acetylation (Protein N-term); Oxidation (M); ethanolamine (DE); ethanolamine (DE)	P32456	1955.97	17
1209	M(+42.01)(+15.99)APGQLALFSVSD(+43.04)	-	-	MAPGQLALFSVSD	K	Acetylation (Protein N-term); Oxidation (M); ethanolamine (DE)	P31939	1435.7	13
1210	M(+42.01)(+15.99)APSVPAAE(+43.04)PE(+43.04)YP	-	-	MAPSVPAAEPEYP	K	Acetylation (Protein N-term); Oxidation (M); ethanolamine (DE); ethanolamine (DE)	P54819	1501.71	13
1211	M(+42.01)(+15.99)ASPLPSGFPA	-	-	MASPLPSGFPA	R	Acetylation (Protein N-term); Oxidation (M)	Q8IXR9	1131.53	11
1212	M(+42.01)(+15.99)D(+43.04)AD(+43.04)DSRAP	-	-	MDADDSRAP	K	Acetylation (Protein N-term); Oxidation (M); ethanolamine (DE); ethanolamine (DE)	Q01813	1120.48	9
1213	M(+42.01)(+15.99)D(+43.04)AGVTE(+43.04)SGLN	-	-	MDAGVTESGLN	V	Acetylation (Protein N-term); Oxidation (M); ethanolamine (DE); ethanolamine (DE)	Q15365	1236.57	11
1214	M(+42.01)(+15.99)D(+43.04)AGVTE(+43.04)SGLNVTLTI	-	-	MDAGVTESGLNVTLTI	R	Acetylation (Protein N-term); Oxidation (M); ethanolamine (DE); ethanolamine (DE)	Q15365	1763.9	16
1215	M(+42.01)(+15.99)D(+43.04)ALE(+43.04)D(+43.04)YVWP	-	-	MDALEDYVWP	R	Acetylation (Protein N-term); Oxidation (M); ethanolamine (DE); ethanolamine (DE); ethanolamine (DE)	Q9NNW5	1424.66	10
1216	M(+42.01)(+15.99)D(+43.04)ALQLANSAF	-	-	MDALQLANSAF	A	Acetylation (Protein N-term); Oxidation (M); ethanolamine (DE)	P36952	1280.61	11
1217	M(+42.01)(+15.99)D(+43.04)ALVE(+43.04)D(+43.04)D(+43.04)IC(+57.02)ILNHE(+43.04)	-	-	MDALVEDDICILNHE	K	Acetylation (Protein N-term); Oxidation (M); ethanolamine (DE); ethanolamine (DE); ethanolamine (DE); more	Q9H6S1	2059.01	15
1218	M(+42.01)(+15.99)D(+43.04)APGALAQTAAPGPGR	-	-	MDAPGALAQTAAPGPGR	K	Acetylation (Protein N-term); Oxidation (M); ethanolamine (DE)	Q9HBH0	1680.83	17
1219	M(+42.01)(+15.99)D(+43.04)D(+43.04)KGDPSN	-	-	MDDKGDPSN	E	Acetylation (Protein N-term); Oxidation (M); ethanolamine (DE); ethanolamine (DE)	Q9BTC0	1121.47	9
1220	M(+42.01)(+15.99)D(+43.04)D(+43.04)TLFQL	-	-	MDDTLFQL	K	Acetylation (Protein N-term); Oxidation (M); ethanolamine (DE); ethanolamine (DE)	Q9HD42	1125.54	8
1221	M(+42.01)(+15.99)D(+43.04)D(+43.04)VPAPTPAPAPPAAAAP	-	-	MDDVPAPTPAPAPPAAAAP	R	Acetylation (Protein N-term); Oxidation (M); ethanolamine (DE); ethanolamine (DE)	Q96SL8	1899.94	19
1222	M(+42.01)(+15.99)D(+43.04)DRE(+43.04)D(+43.04)LVYQA	-	-	MDDREDLVYQA	K	Acetylation (Protein N-term); Oxidation (M); ethanolamine (DE); ethanolamine (DE); ethanolamine (DE)	P62258	1540.72	11
1223	M(+42.01)(+15.99)D(+43.04)DRED(+43.04)LVYQA	-	-	MDDREDLVYQA	K	Acetylation (Protein N-term); Oxidation (M); ethanolamine (DE); ethanolamine (DE)	P62258	1497.68	11
1224	M(+42.01)(+15.99)D(+43.04)E(+43.04)AGSSASGGGF	-	-	MDEAGSSASGGGF	R	Acetylation (Protein N-term); Oxidation (M); ethanolamine (DE); ethanolamine (DE)	Q8IUH3	1315.54	13
1225	M(+42.01)(+15.99)D(+43.04)E(+43.04)AVGD(+43.04)L	-	-	MDEAVGDL	K	Acetylation (Protein N-term); Oxidation (M); ethanolamine (DE); ethanolamine (DE); ethanolamine (DE)	Q15645	1035.49	8
1226	M(+42.01)(+15.99)D(+43.04)E(+43.04)E(+43.04)SLE(+43.04)SALQTY	-	-	MDEESLESALQTY	R	Acetylation (Protein N-term); Oxidation (M); ethanolamine (DE); ethanolamine (DE); ethanolamine (DE); more	Q8N5A5	1744.82	13
1227	M(+42.01)(+15.99)D(+43.04)E(+43.04)LAGGGGGGPGMAAPP	-	-	MDELAGGGGGGPGMAAPP	R	Acetylation (Protein N-term); Oxidation (M); ethanolamine (DE); ethanolamine (DE)	Q13033	1684.75	18
1228	M(+42.01)(+15.99)D(+43.04)E(+43.04)LQD(+43.04)VQLTE(+43.04)IKPLLND(+43.04)	-	-	MDELQDVQLTEIKPLLND	K	Acetylation (Protein N-term); Oxidation (M); ethanolamine (DE); ethanolamine (DE); ethanolamine (DE); more	Q9UGV2	2386.28	18
1229	M(+42.01)(+15.99)D(+43.04)E(+43.04)M(+15.99)ATTQIS	-	-	MDEMATTQIS	K	Acetylation (Protein N-term); Oxidation (M); ethanolamine (DE); ethanolamine (DE); Oxidation (M)	P13797	1285.55	10
1230	M(+42.01)(+15.99)D(+43.04)E(+43.04)MATTQIS	-	-	MDEMATTQIS	K	Acetylation (Protein N-term); Oxidation (M); ethanolamine (DE); ethanolamine (DE)	P13797	1269.56	10
1231	M(+42.01)(+15.99)D(+43.04)E(+43.04)PSPLAQPLE(+43.04)LNQHS	-	-	MDEPSPLAQPLELNQHS	R	Acetylation (Protein N-term); Oxidation (M); ethanolamine (DE); ethanolamine (DE); ethanolamine (DE)	Q13085	2092.03	17
1232	M(+42.01)(+15.99)D(+43.04)E(+43.04)QAGPGVFFSNNHPGAGGA	-	-	MDEQAGPGVFFSNNHPGAGGA	K	Acetylation (Protein N-term); Oxidation (M); ethanolamine (DE); ethanolamine (DE)	O43815	2202.98	21
1233	M(+42.01)(+15.99)D(+43.04)E(+43.04)QALLGLNPNAD(+43.04)	-	-	MDEQALLGLNPNAD	S	Acetylation (Protein N-term); Oxidation (M); ethanolamine (DE); ethanolamine (DE); ethanolamine (DE)	O43592	1686.82	14
1234	M(+42.01)(+15.99)D(+43.04)E(+43.04)QSQGM(+15.99)QGPPVPQFQPQ	-	-	MDEQSQGMQGPPVPQFQPQ	K	Acetylation (Protein N-term); Oxidation (M); ethanolamine (DE); ethanolamine (DE); Oxidation (M)	Q8TDX7	2288.02	19
1235	M(+42.01)(+15.99)D(+43.04)E(+43.04)QSQGMQGPPVPQFQPQ	-	-	MDEQSQGMQGPPVPQFQPQ	K	Acetylation (Protein N-term); Oxidation (M); ethanolamine (DE); ethanolamine (DE)	Q8TDX7	2272.03	19
1236	M(+42.01)(+15.99)D(+43.04)E(+43.04)TSPLVSPE(+43.04)	-	-	MDETSPLVSPE	R	Acetylation (Protein N-term); Oxidation (M); ethanolamine (DE); ethanolamine (DE); ethanolamine (DE)	Q9BTU6	1390.66	11
1237	M(+42.01)(+15.99)D(+43.04)FE(+43.04)D(+43.04)D(+43.04)YTHSAC(+57.02)	-	-	MDFEDDYTHSAC	R	Acetylation (Protein N-term); Oxidation (M); ethanolamine (DE); ethanolamine (DE); ethanolamine (DE); more	Q5BKZ1	1719.69	12
1238	M(+42.01)(+15.99)D(+43.04)FE(+43.04)DD(+43.04)YTHSAC(+57.02)	-	-	MDFEDDYTHSAC	R	Acetylation (Protein N-term); Oxidation (M); ethanolamine (DE); ethanolamine (DE); ethanolamine (DE); more	Q5BKZ1	1676.64	12
1239	M(+42.01)(+15.99)D(+43.04)FLLGNPFSSPVGQ	-	-	MDFLLGNPFSSPVGQ	R	Acetylation (Protein N-term); Oxidation (M); ethanolamine (DE)	O60784	1708.81	15
1240	M(+42.01)(+15.99)D(+43.04)GAAGPGDGPA(+43.04)	-	-	MDGAAGPGDGPA	R	Acetylation (Protein N-term); Oxidation (M); ethanolamine (DE); ethanolamine (C-term)	Q32P44	1158.5	12
1241	M(+42.01)(+15.99)D(+43.04)GASAE(+43.04)QD(+43.04)GLQE(+43.04)D(+43.04)	-	-	MDGASAEQDGLQED	R	Acetylation (Protein N-term); Oxidation (M); ethanolamine (DE); ethanolamine (DE); ethanolamine (DE); more	Q08378	1737.78	14
1242	M(+42.01)(+15.99)D(+43.04)GASAE(+43.04)QD(+43.04)GLQED(+43.04)(+43.04)	-	-	MDGASAEQDGLQED	R	Acetylation (Protein N-term); Oxidation (M); ethanolamine (DE); ethanolamine (DE); ethanolamine (DE); more	Q08378	1737.78	14
1243	M(+42.01)(+15.99)D(+43.04)GASAE(+43.04)QDGLQE(+43.04)D(+43.04)	-	-	MDGASAEQDGLQED	R	Acetylation (Protein N-term); Oxidation (M); ethanolamine (DE); ethanolamine (DE); ethanolamine (DE); more	Q08378	1694.74	14
1244	M(+42.01)(+15.99)D(+43.04)GIVPD(+43.04)IAVGT	-	-	MDGIVPDIAVGT	K	Acetylation (Protein N-term); Oxidation (M); ethanolamine (DE); ethanolamine (DE)	P26599	1330.68	12
1245	M(+42.01)(+15.99)D(+43.04)GIVPD(+43.04)IAVGTK	-	-	MDGIVPDIAVGTK	R	Acetylation (Protein N-term); Oxidation (M); ethanolamine (DE); ethanolamine (DE)	P26599	1458.78	13
1246	M(+42.01)(+15.99)D(+43.04)GIVTE(+43.04)VAVGVK	-	-	MDGIVTEVAVGVK	R	Acetylation (Protein N-term); Oxidation (M); ethanolamine (DE); ethanolamine (DE)	Q9UKA9	1460.79	13
1247	M(+42.01)(+15.99)D(+43.04)GLQASAGPL	-	-	MDGLQASAGPL	R	Acetylation (Protein N-term); Oxidation (M); ethanolamine (DE)	Q9H6W3	1159.55	11
1248	M(+42.01)(+15.99)D(+43.04)GPVAE(+43.04)HA	-	-	MDGPVAEHA	K	Acetylation (Protein N-term); Oxidation (M); ethanolamine (DE); ethanolamine (DE)	Q96GA7	1069.49	9
1249	M(+42.01)(+15.99)D(+43.04)GSGPFSC(+57.02)PIC(+57.02)LE(+43.04)PL	-	-	MDGSGPFSCPICLEPL	R	Acetylation (Protein N-term); Oxidation (M); ethanolamine (DE); Carbamidomethylation; Carbamidomethylation; more	Q96LD4	1922.86	16
1250	M(+42.01)(+15.99)D(+43.04)GTE(+43.04)GSAGQPGPAE(+43.04)	-	-	MDGTEGSAGQPGPAE	R	Acetylation (Protein N-term); Oxidation (M); ethanolamine (DE); ethanolamine (DE); ethanolamine (DE)	Q9BZ67	1589.7	15
1251	M(+42.01)(+15.99)D(+43.04)HYD(+43.04)SQQTN	-	-	MDHYDSQQTN	D	Acetylation (Protein N-term); Oxidation (M); ethanolamine (DE); ethanolamine (DE)	P12814	1381.56	10
1252	M(+42.01)(+15.99)D(+43.04)HYD(+43.04)SQQTND(+43.04)	-	-	MDHYDSQQTND	Y	Acetylation (Protein N-term); Oxidation (M); ethanolamine (DE); ethanolamine (DE); ethanolamine (DE)	P12814	1539.63	11
1253	M(+42.01)(+15.99)D(+43.04)HYD(+43.04)SQQTND(+43.04)Y	-	-	MDHYDSQQTNDY	M	Acetylation (Protein N-term); Oxidation (M); ethanolamine (DE); ethanolamine (DE); ethanolamine (DE)	P12814	1702.69	12
1254	M(+42.01)(+15.99)D(+43.04)HYD(+43.04)SQQTNDY(+43.04)	-	-	MDHYDSQQTNDY	M	Acetylation (Protein N-term); Oxidation (M); ethanolamine (DE); ethanolamine (DE); ethanolamine (C-term)	P12814	1702.69	12
1255	M(+42.01)(+15.99)D(+43.04)LAAAAE(+43.04)PGAGSQHLE(+43.04)V	-	-	MDLAAAAEPGAGSQHLEV	R	Acetylation (Protein N-term); Oxidation (M); ethanolamine (DE); ethanolamine (DE); ethanolamine (DE)	Q14566	1952.96	18
1256	M(+42.01)(+15.99)D(+43.04)LAAAAE(+43.04)PGAGSQHLEV(+43.04)	-	-	MDLAAAAEPGAGSQHLEV	R	Acetylation (Protein N-term); Oxidation (M); ethanolamine (DE); ethanolamine (DE); ethanolamine (C-term)	Q14566	1952.96	18
1257	M(+42.01)(+15.99)D(+43.04)LFGD(+43.04)LPE(+43.04)PE(+43.04)	-	-	MDLFGDLPEPE	R	Acetylation (Protein N-term); Oxidation (M); ethanolamine (DE); ethanolamine (DE); ethanolamine (DE); more	Q9H0C8	1491.73	11
1258	M(+42.01)(+15.99)D(+43.04)LLPPKP	-	-	MDLLPPKP	K	Acetylation (Protein N-term); Oxidation (M); ethanolamine (DE)	P29353	1010.55	8
1259	M(+42.01)(+15.99)D(+43.04)LPVGPGAAGPSNVPAFLT	-	-	MDLPVGPGAAGPSNVPAFLT	K	Acetylation (Protein N-term); Oxidation (M); ethanolamine (DE)	Q00613	2011.01	20
1260	M(+42.01)(+15.99)D(+43.04)LQAAGAQAQGAAE(+43.04)PS	-	-	MDLQAAGAQAQGAAEPS	R	Acetylation (Protein N-term); Oxidation (M); ethanolamine (DE); ethanolamine (DE)	Q9NQ92	1758.82	17
1261	M(+42.01)(+15.99)D(+43.04)LYSTPAAALD(+43.04)	-	-	MDLYSTPAAALD	R	Acetylation (Protein N-term); Oxidation (M); ethanolamine (DE); ethanolamine (DE)	Q9Y6K5	1410.67	12
1262	M(+42.01)(+15.99)D(+43.04)M(+15.99)GNQHPSIS	-	-	MDMGNQHPSIS	R	Acetylation (Protein N-term); Oxidation (M); ethanolamine (DE); Oxidation (M)	Q9UL15	1332.54	11
1263	M(+42.01)(+15.99)D(+43.04)M(+15.99)LD(+43.04)PGLD(+43.04)PAASATAAAAASHD(+43.04)	-	-	MDMLDPGLDPAASATAAAAASHD	K	Acetylation (Protein N-term); Oxidation (M); ethanolamine (DE); Oxidation (M); ethanolamine (DE); more	Q15853	2444.13	23
1264	M(+42.01)(+15.99)D(+43.04)MGNQHPSIS	-	-	MDMGNQHPSIS	R	Acetylation (Protein N-term); Oxidation (M); ethanolamine (DE)	Q9UL15	1316.55	11
1265	M(+42.01)(+15.99)D(+43.04)MLD(+43.04)PGLD(+43.04)PAASATAAAAASHD(+43.04)	-	-	MDMLDPGLDPAASATAAAAASHD	K	Acetylation (Protein N-term); Oxidation (M); ethanolamine (DE); ethanolamine (DE); ethanolamine (DE); more	Q15853	2428.14	23
1266	M(+42.01)(+15.99)D(+43.04)NFFTE(+43.04)GT	-	-	MDNFFTEGT	R	Acetylation (Protein N-term); Oxidation (M); ethanolamine (DE); ethanolamine (DE)	Q9HD67	1204.51	9
1267	M(+42.01)(+15.99)D(+43.04)NLSD(+43.04)TLK	-	-	MDNLSDTLK	K	Acetylation (Protein N-term); Oxidation (M); ethanolamine (DE); ethanolamine (DE)	P52306	1179.58	9
1268	M(+42.01)(+15.99)D(+43.04)NLSSE(+43.04)E(+43.04)IQQ	-	-	MDNLSSEEIQQ	R	Acetylation (Protein N-term); Oxidation (M); ethanolamine (DE); ethanolamine (DE); ethanolamine (DE)	O00161	1479.69	11
1269	M(+42.01)(+15.99)D(+43.04)NQC(+57.02)TVQV	-	-	MDNQCTVQV	R	Acetylation (Protein N-term); Oxidation (M); ethanolamine (DE); Carbamidomethylation	Q03111	1194.5	9
1270	M(+42.01)(+15.99)D(+43.04)NYAD(+43.04)LSD(+43.04)	-	-	MDNYADLSD	T	Acetylation (Protein N-term); Oxidation (M); ethanolamine (DE); ethanolamine (DE); ethanolamine (DE)	P50402	1229.52	9
1271	M(+42.01)(+15.99)D(+43.04)NYAD(+43.04)LSD(+43.04)TE(+43.04)LTTLL	-	-	MDNYADLSDTELTTLL	R	Acetylation (Protein N-term); Oxidation (M); ethanolamine (DE); ethanolamine (DE); ethanolamine (DE); more	P50402	2044	16
1272	M(+42.01)(+15.99)D(+43.04)NYADLSD(+43.04)TE(+43.04)LTTLL	-	-	MDNYADLSDTELTTLL	R	Acetylation (Protein N-term); Oxidation (M); ethanolamine (DE); ethanolamine (DE); ethanolamine (DE)	P50402	2000.96	16
1273	M(+42.01)(+15.99)D(+43.04)PAPSLGC(+57.02)SL	-	-	MDPAPSLGCSL	K	Acetylation (Protein N-term); Oxidation (M); ethanolamine (DE); Carbamidomethylation	Q9H706	1247.55	11
1274	M(+42.01)(+15.99)D(+43.04)PGQQPPPQPAPQGQGQPPSQPPQGQGPPSGPGQPAPAATQ	-	-	MDPGQQPPPQPAPQGQGQPPSQPPQGQGPPSGPGQPAPAATQ	A	Acetylation (Protein N-term); Oxidation (M); ethanolamine (DE)	P46937	4187.97	42
1275	M(+42.01)(+15.99)D(+43.04)PLFQQTH	-	-	MDPLFQQTH	K	Acetylation (Protein N-term); Oxidation (M); ethanolamine (DE)	O14653	1216.55	9
1276	M(+42.01)(+15.99)D(+43.04)PNC(+57.02)SC(+57.02)AAGD(+43.04)	-	-	MDPNCSCAAGD	S	Acetylation (Protein N-term); Oxidation (M); ethanolamine (DE); Carbamidomethylation; Carbamidomethylation; more	P02795	1340.48	11
1277	M(+42.01)(+15.99)D(+43.04)PNC(+57.02)SC(+57.02)AAGD(+43.04)SC(+57.02)TC(+57.02)AG	-	-	MDPNCSCAAGDSCTCAG	S	Acetylation (Protein N-term); Oxidation (M); ethanolamine (DE); Carbamidomethylation; Carbamidomethylation; more	P02795	1976.68	17
1278	M(+42.01)(+15.99)D(+43.04)PNC(+57.02)SC(+57.02)AAGD(+43.04)SC(+57.02)TC(+57.02)AGSC(+57.02)	-	-	MDPNCSCAAGDSCTCAGSC	K	Acetylation (Protein N-term); Oxidation (M); ethanolamine (DE); Carbamidomethylation; Carbamidomethylation; more	P02795	2223.74	19
1279	M(+42.01)(+15.99)D(+43.04)PNC(+57.02)SC(+57.02)AAGDSC(+57.02)TC(+57.02)AGSC(+57.02)	-	-	MDPNCSCAAGDSCTCAGSC	K	Acetylation (Protein N-term); Oxidation (M); ethanolamine (DE); Carbamidomethylation; Carbamidomethylation; more	P02795	2180.7	19
1280	M(+42.01)(+15.99)D(+43.04)PNC(+57.02)SC(+57.02)ATGGSC(+57.02)SC(+57.02)ASSC(+57.02)	-	-	MDPNCSCATGGSCSCASSC	K	Acetylation (Protein N-term); Oxidation (M); ethanolamine (DE); Carbamidomethylation; Carbamidomethylation; more	Q93083	2168.7	19
1281	M(+42.01)(+15.99)D(+43.04)PNC(+57.02)SC(+57.02)ATGGSC(+57.02)TC(+57.02)AGSC(+57.02)	-	-	MDPNCSCATGGSCTCAGSC	K	Acetylation (Protein N-term); Oxidation (M); ethanolamine (DE); Carbamidomethylation; Carbamidomethylation; more	P04732	2152.7	19
1282	M(+42.01)(+15.99)D(+43.04)PNC(+57.02)SC(+57.02)SPVGSC(+57.02)AC(+57.02)AGSC(+57.02)	-	-	MDPNCSCSPVGSCACAGSC	K	Acetylation (Protein N-term); Oxidation (M); ethanolamine (DE); Carbamidomethylation; Carbamidomethylation; more	P80297	2176.74	19
1283	M(+42.01)(+15.99)D(+43.04)PNTIIE(+43.04)AL	-	-	MDPNTIIEAL	R	Acetylation (Protein N-term); Oxidation (M); ethanolamine (DE); ethanolamine (DE)	O95373	1259.64	10
1284	M(+42.01)(+15.99)D(+43.04)PQE(+43.04)MVV	-	-	MDPQEMVV	K	Acetylation (Protein N-term); Oxidation (M); ethanolamine (DE); ethanolamine (DE)	A8MQ03	1091.5	8
1285	M(+42.01)(+15.99)D(+43.04)PSD(+43.04)FPSPFD(+43.04)PLTLPE(+43.04)	-	-	MDPSDFPSPFDPLTLPE	K	Acetylation (Protein N-term); Oxidation (M); ethanolamine (DE); ethanolamine (DE); ethanolamine (DE); more	Q14202	2134.03	17
1286	M(+42.01)(+15.99)D(+43.04)QE(+43.04)PVGGVE(+43.04)	-	-	MDQEPVGGVE	R	Acetylation (Protein N-term); Oxidation (M); ethanolamine (DE); ethanolamine (DE); ethanolamine (DE)	Q8N128	1246.59	10
1287	M(+42.01)(+15.99)D(+43.04)QVM(+15.99)QFVE(+43.04)PS	-	-	MDQVMQFVEPS	R	Acetylation (Protein N-term); Oxidation (M); ethanolamine (DE); Oxidation (M); ethanolamine (DE)	P60059	1469.65	11
1288	M(+42.01)(+15.99)D(+43.04)QVM(+15.99)QFVEPS(+43.04)	-	-	MDQVMQFVEPS	R	Acetylation (Protein N-term); Oxidation (M); ethanolamine (DE); Oxidation (M); ethanolamine (C-term)	P60059	1469.65	11
1289	M(+42.01)(+15.99)D(+43.04)SAGQD(+43.04)INLN	-	-	MDSAGQDINLN	S	Acetylation (Protein N-term); Oxidation (M); ethanolamine (DE); ethanolamine (DE)	O43399	1320.6	11
1290	M(+42.01)(+15.99)D(+43.04)SAGQD(+43.04)INLNSPN	-	-	MDSAGQDINLNSPN	K	Acetylation (Protein N-term); Oxidation (M); ethanolamine (DE); ethanolamine (DE)	O43399	1618.73	14
1291	M(+42.01)(+15.99)D(+43.04)SE(+43.04)AFQSA	-	-	MDSEAFQSA	R	Acetylation (Protein N-term); Oxidation (M); ethanolamine (DE); ethanolamine (DE)	Q8WUF5	1128.48	9
1292	M(+42.01)(+15.99)D(+43.04)SSSSSSAAGLGAVD(+43.04)PQLQHFIE(+43.04)VE(+43.04)TQ	-	-	MDSSSSSSAAGLGAVDPQLQHFIEVETQ	K	Acetylation (Protein N-term); Oxidation (M); ethanolamine (DE); ethanolamine (DE); ethanolamine (DE); more	O60220	3120.5	28
1293	M(+42.01)(+15.99)D(+43.04)STLTASE(+43.04)I	-	-	MDSTLTASEI	R	Acetylation (Protein N-term); Oxidation (M); ethanolamine (DE); ethanolamine (DE)	P49588	1210.58	10
1294	M(+42.01)(+15.99)D(+43.04)TE(+43.04)GFGE(+43.04)LLQQAEQL(+43.04)	-	-	MDTEGFGELLQQAEQL	A	Acetylation (Protein N-term); Oxidation (M); ethanolamine (DE); ethanolamine (DE); ethanolamine (DE); more	Q8N1F7	2038	16
1295	M(+42.01)(+15.99)D(+43.04)TE(+43.04)STYSGYSYYSSHS	-	-	MDTESTYSGYSYYSSHS	K	Acetylation (Protein N-term); Oxidation (M); ethanolamine (DE); ethanolamine (DE)	Q8TAA9	2107.83	17
1296	M(+42.01)(+15.99)D(+43.04)VAE(+43.04)SPE(+43.04)	-	-	MDVAESPE	R	Acetylation (Protein N-term); Oxidation (M); ethanolamine (DE); ethanolamine (DE); ethanolamine (DE)	Q86VM9	1063.49	8
1297	M(+42.01)(+15.99)D(+43.04)VFLM(+15.99)I	-	-	MDVFLMI	R	Acetylation (Protein N-term); Oxidation (M); ethanolamine (DE); Oxidation (M)	Q15370	984.466	7
1298	M(+42.01)(+15.99)D(+43.04)VFLM(+15.99)IR	-	-	MDVFLMIR	R	Acetylation (Protein N-term); Oxidation (M); ethanolamine (DE); Oxidation (M)	Q15370	1140.57	8
1299	M(+42.01)(+15.99)D(+43.04)VGE(+43.04)LLSYQPN	-	-	MDVGELLSYQPN	R	Acetylation (Protein N-term); Oxidation (M); ethanolamine (DE); ethanolamine (DE)	Q8WYA6	1508.72	12
1300	M(+42.01)(+15.99)D(+43.04)VHD(+43.04)LF	-	-	MDVHDLF	R	Acetylation (Protein N-term); Oxidation (M); ethanolamine (DE); ethanolamine (DE)	Q9Y2R4	1019.47	7
1301	M(+42.01)(+15.99)D(+43.04)VLAE(+43.04)E(+43.04)FGNLTPE(+43.04)QLAAPIPTVEE(+43.04)(+43.04)	-	-	MDVLAEEFGNLTPEQLAAPIPTVEE	K	Acetylation (Protein N-term); Oxidation (M); ethanolamine (DE); ethanolamine (DE); ethanolamine (DE); more	Q9NW08	3028.58	25
1302	M(+42.01)(+15.99)D(+43.04)VLVSE(+43.04)C(+57.02)SA	-	-	MDVLVSECSA	R	Acetylation (Protein N-term); Oxidation (M); ethanolamine (DE); ethanolamine (DE); Carbamidomethylation	P54136	1253.56	10
1303	M(+42.01)(+15.99)D(+43.04)VTSSSGGGGD(+43.04)P	-	-	MDVTSSSGGGGDP	R	Acetylation (Protein N-term); Oxidation (M); ethanolamine (DE); ethanolamine (DE)	Q8IY22	1309.55	13
1304	M(+42.01)(+15.99)DD(+43.04)RE(+43.04)D(+43.04)LVYQA	-	-	MDDREDLVYQA	K	Acetylation (Protein N-term); Oxidation (M); ethanolamine (DE); ethanolamine (DE); ethanolamine (DE)	P62258	1540.72	11
1305	M(+42.01)(+15.99)DDRE(+43.04)D(+43.04)LVYQA	-	-	MDDREDLVYQA	K	Acetylation (Protein N-term); Oxidation (M); ethanolamine (DE); ethanolamine (DE)	P62258	1497.68	11
1306	M(+42.01)(+15.99)DFE(+43.04)D(+43.04)D(+43.04)YTHSAC(+57.02)	-	-	MDFEDDYTHSAC	R	Acetylation (Protein N-term); Oxidation (M); ethanolamine (DE); ethanolamine (DE); ethanolamine (DE); more	Q5BKZ1	1676.64	12
1307	M(+42.01)(+15.99)DGIVPD(+43.04)IAVGT	-	-	MDGIVPDIAVGT	K	Acetylation (Protein N-term); Oxidation (M); ethanolamine (DE)	P26599	1287.64	12
1308	M(+42.01)(+15.99)DGIVPD(+43.04)IAVGTK	-	-	MDGIVPDIAVGTK	R	Acetylation (Protein N-term); Oxidation (M); ethanolamine (DE)	P26599	1415.73	13
1309	M(+42.01)(+15.99)DGSGPFSC(+57.02)PIC(+57.02)LE(+43.04)PL	-	-	MDGSGPFSCPICLEPL	R	Acetylation (Protein N-term); Oxidation (M); Carbamidomethylation; Carbamidomethylation; ethanolamine (DE)	Q96LD4	1879.82	16
1310	M(+42.01)(+15.99)DNYAD(+43.04)LSD(+43.04)TE(+43.04)LTTLL	-	-	MDNYADLSDTELTTLL	R	Acetylation (Protein N-term); Oxidation (M); ethanolamine (DE); ethanolamine (DE); ethanolamine (DE)	P50402	2000.96	16
1311	M(+42.01)(+15.99)DPNC(+57.02)SC(+57.02)AAGDSC(+57.02)TC(+57.02)AGSC(+57.02)	-	-	MDPNCSCAAGDSCTCAGSC	K	Acetylation (Protein N-term); Oxidation (M); Carbamidomethylation; Carbamidomethylation; Carbamidomethylation; more	P02795	2137.66	19
1312	M(+42.01)(+15.99)DSAGQD(+43.04)INLNSPN	-	-	MDSAGQDINLNSPN	K	Acetylation (Protein N-term); Oxidation (M); ethanolamine (DE)	O43399	1575.68	14
1313	M(+42.01)(+15.99)DSTLTASE(+43.04)I	-	-	MDSTLTASEI	R	Acetylation (Protein N-term); Oxidation (M); ethanolamine (DE)	P49588	1167.53	10
1314	M(+42.01)(+15.99)E(+43.04)AAAE(+43.04)PGNLAGV	-	-	MEAAAEPGNLAGV	R	Acetylation (Protein N-term); Oxidation (M); ethanolamine (DE); ethanolamine (DE)	Q9Y5Y2	1372.67	13
1315	M(+42.01)(+15.99)E(+43.04)AAGSPAATE(+43.04)TG	-	-	MEAAGSPAATETG	K	Acetylation (Protein N-term); Oxidation (M); ethanolamine (DE); ethanolamine (DE)	Q9BRP8	1335.6	13
1316	M(+42.01)(+15.99)E(+43.04)AAHFFE(+43.04)GTE(+43.04)	-	-	MEAAHFFEGTE	K	Acetylation (Protein N-term); Oxidation (M); ethanolamine (DE); ethanolamine (DE); ethanolamine (DE)	P17707	1454.65	11
1317	M(+42.01)(+15.99)E(+43.04)AAHLLPAAD(+43.04)VL	-	-	MEAAHLLPAADVL	R	Acetylation (Protein N-term); Oxidation (M); ethanolamine (DE); ethanolamine (DE)	Q93084	1493.79	13
1318	M(+42.01)(+15.99)E(+43.04)AAVGVPD(+43.04)GGD(+43.04)QGGAGP	-	-	MEAAVGVPDGGDQGGAGP	R	Acetylation (Protein N-term); Oxidation (M); ethanolamine (DE); ethanolamine (DE); ethanolamine (DE)	Q01804	1770.82	18
1319	M(+42.01)(+15.99)E(+43.04)AFQE(+43.04)L	-	-	MEAFQEL	R	Acetylation (Protein N-term); Oxidation (M); ethanolamine (DE); ethanolamine (DE)	Q96JM3	1010.47	7
1320	M(+42.01)(+15.99)E(+43.04)ALGPGGD(+43.04)	-	-	MEALGPGGD	R	Acetylation (Protein N-term); Oxidation (M); ethanolamine (DE); ethanolamine (DE)	Q2M3G4	989.449	9
1321	M(+42.01)(+15.99)E(+43.04)ALILE(+43.04)PSLYTV	-	-	MEALILEPSLYTV	K	Acetylation (Protein N-term); Oxidation (M); ethanolamine (DE); ethanolamine (DE)	P61923	1621.86	13
1322	M(+42.01)(+15.99)E(+43.04)ALIPVIN	-	-	MEALIPVIN	K	Acetylation (Protein N-term); Oxidation (M); ethanolamine (DE)	O00429	1099.59	9
1323	M(+42.01)(+15.99)E(+43.04)APGLAQAAAAE(+43.04)SD(+43.04)S	-	-	MEAPGLAQAAAAESDS	R	Acetylation (Protein N-term); Oxidation (M); ethanolamine (DE); ethanolamine (DE); ethanolamine (DE)	P51817	1704.8	16
1324	M(+42.01)(+15.99)E(+43.04)AQSHSSTTTE(+43.04)	-	-	MEAQSHSSTTTE	K	Acetylation (Protein N-term); Oxidation (M); ethanolamine (DE); ethanolamine (DE)	P10071	1451.62	12
1325	M(+42.01)(+15.99)E(+43.04)ATGTD(+43.04)E(+43.04)VD(+43.04)	-	-	MEATGTDEVD	K	Acetylation (Protein N-term); Oxidation (M); ethanolamine (DE); ethanolamine (DE); ethanolamine (DE); more	Q96DT6	1296.59	10
1326	M(+42.01)(+15.99)E(+43.04)ATGVLPFV	-	-	MEATGVLPFV	R	Acetylation (Protein N-term); Oxidation (M); ethanolamine (DE)	Q13045	1163.59	10
1327	M(+42.01)(+15.99)E(+43.04)ATLE(+43.04)QHLE(+43.04)D(+43.04)	-	-	MEATLEQHLED	T	Acetylation (Protein N-term); Oxidation (M); ethanolamine (DE); ethanolamine (DE); ethanolamine (DE); more	O43504	1544.75	11
1328	M(+42.01)(+15.99)E(+43.04)ATLE(+43.04)QHLE(+43.04)D(+43.04)T	-	-	MEATLEQHLEDT	M	Acetylation (Protein N-term); Oxidation (M); ethanolamine (DE); ethanolamine (DE); ethanolamine (DE); more	O43504	1645.8	12
1329	M(+42.01)(+15.99)E(+43.04)ATLE(+43.04)QHLE(+43.04)D(+43.04)TM	-	-	MEATLEQHLEDTM	K	Acetylation (Protein N-term); Oxidation (M); ethanolamine (DE); ethanolamine (DE); ethanolamine (DE); more	O43504	1776.84	13
1330	M(+42.01)(+15.99)E(+43.04)ATLE(+43.04)QHLE(+43.04)D(+43.04)TM(+15.99)	-	-	MEATLEQHLEDTM	K	Acetylation (Protein N-term); Oxidation (M); ethanolamine (DE); ethanolamine (DE); ethanolamine (DE); more	O43504	1792.83	13
1331	M(+42.01)(+15.99)E(+43.04)ATLE(+43.04)QHLE(+43.04)DTM	-	-	MEATLEQHLEDTM	K	Acetylation (Protein N-term); Oxidation (M); ethanolamine (DE); ethanolamine (DE); ethanolamine (DE)	O43504	1733.8	13
1332	M(+42.01)(+15.99)E(+43.04)AVVNLYQE(+43.04)VM	-	-	MEAVVNLYQEVM	K	Acetylation (Protein N-term); Oxidation (M); ethanolamine (DE); ethanolamine (DE)	Q9BW60	1568.76	12
1333	M(+42.01)(+15.99)E(+43.04)C(+57.02)PHLSSSVC(+57.02)IAPD(+43.04)SA	-	-	MECPHLSSSVCIAPDSA	K	Acetylation (Protein N-term); Oxidation (M); ethanolamine (DE); Carbamidomethylation; Carbamidomethylation; more	Q9Y6I4	2003.88	17
1334	M(+42.01)(+15.99)E(+43.04)C(+57.02)PSC(+57.02)QHVS	-	-	MECPSCQHVS	K	Acetylation (Protein N-term); Oxidation (M); ethanolamine (DE); Carbamidomethylation; Carbamidomethylation	Q63HN8	1334.51	10
1335	M(+42.01)(+15.99)E(+43.04)D(+43.04)D(+43.04)APVIYGLE(+43.04)FQA	-	-	MEDDAPVIYGLEFQA	R	Acetylation (Protein N-term); Oxidation (M); ethanolamine (DE); ethanolamine (DE); ethanolamine (DE); more	Q53HC9	1926.94	15
1336	M(+42.01)(+15.99)E(+43.04)D(+43.04)GGLTAFE(+43.04)E(+43.04)D(+43.04)Q	-	-	MEDGGLTAFEEDQ	R	Acetylation (Protein N-term); Oxidation (M); ethanolamine (DE); ethanolamine (DE); ethanolamine (DE); more	Q96RG2	1713.79	13
1337	M(+42.01)(+15.99)E(+43.04)D(+43.04)HQHVPID(+43.04)IQTS	-	-	MEDHQHVPIDIQTS	K	Acetylation (Protein N-term); Oxidation (M); ethanolamine (DE); ethanolamine (DE); ethanolamine (DE)	Q96JB5	1835.88	14
1338	M(+42.01)(+15.99)E(+43.04)D(+43.04)LD(+43.04)QSPLVSSSD(+43.04)	-	-	MEDLDQSPLVSSSD	S	Acetylation (Protein N-term); Oxidation (M); ethanolamine (DE); ethanolamine (DE); ethanolamine (DE); more	Q9NQC3	1751.82	14
1339	M(+42.01)(+15.99)E(+43.04)D(+43.04)LD(+43.04)QSPLVSSSD(+43.04)SPPRPQPAF	-	-	MEDLDQSPLVSSSDSPPRPQPAF	K	Acetylation (Protein N-term); Oxidation (M); ethanolamine (DE); ethanolamine (DE); ethanolamine (DE); more	Q9NQC3	2729.33	23
1340	M(+42.01)(+15.99)E(+43.04)D(+43.04)LGE(+43.04)NTMVLSTL	-	-	MEDLGENTMVLSTL	R	Acetylation (Protein N-term); Oxidation (M); ethanolamine (DE); ethanolamine (DE); ethanolamine (DE)	Q9Y6D9	1738.85	14
1341	M(+42.01)(+15.99)E(+43.04)D(+43.04)PSE(+43.04)PD(+43.04)	-	-	MEDPSEPD	R	Acetylation (Protein N-term); Oxidation (M); ethanolamine (DE); ethanolamine (DE); ethanolamine (DE); more	Q8TCG2	1148.5	8
1342	M(+42.01)(+15.99)E(+43.04)D(+43.04)PTLYIVE(+43.04)	-	-	MEDPTLYIVE	R	Acetylation (Protein N-term); Oxidation (M); ethanolamine (DE); ethanolamine (DE); ethanolamine (DE)	Q6NZI2	1395.7	10
1343	M(+42.01)(+15.99)E(+43.04)D(+43.04)SASASLSSAAATGTSTSTPAAPTA	-	-	MEDSASASLSSAAATGTSTSTPAAPTA	R	Acetylation (Protein N-term); Oxidation (M); ethanolamine (DE); ethanolamine (DE)	O76021	2584.18	27
1344	M(+42.01)(+15.99)E(+43.04)D(+43.04)SE(+43.04)ALGFE(+43.04)HMGLD(+43.04)P	-	-	MEDSEALGFEHMGLDP	R	Acetylation (Protein N-term); Oxidation (M); ethanolamine (DE); ethanolamine (DE); ethanolamine (DE); more	Q9NY93	2049.95	16
1345	M(+42.01)(+15.99)E(+43.04)D(+43.04)SM(+15.99)D(+43.04)MD(+43.04)MSPL	-	-	MEDSMDMDMSPL	R	Acetylation (Protein N-term); Oxidation (M); ethanolamine (DE); ethanolamine (DE); Oxidation (M); more	P06748	1646.67	12
1346	M(+42.01)(+15.99)E(+43.04)D(+43.04)SM(+15.99)D(+43.04)MDM(+15.99)SPL	-	-	MEDSMDMDMSPL	R	Acetylation (Protein N-term); Oxidation (M); ethanolamine (DE); ethanolamine (DE); Oxidation (M); more	P06748	1619.62	12
1347	M(+42.01)(+15.99)E(+43.04)D(+43.04)SM(+15.99)D(+43.04)MDMSPL	-	-	MEDSMDMDMSPL	R	Acetylation (Protein N-term); Oxidation (M); ethanolamine (DE); ethanolamine (DE); Oxidation (M); more	P06748	1603.62	12
1348	M(+42.01)(+15.99)E(+43.04)D(+43.04)SM(+15.99)DM(+15.99)D(+43.04)MSPL	-	-	MEDSMDMDMSPL	R	Acetylation (Protein N-term); Oxidation (M); ethanolamine (DE); ethanolamine (DE); Oxidation (M); more	P06748	1619.62	12
1349	M(+42.01)(+15.99)E(+43.04)D(+43.04)SM(+15.99)DMD(+43.04)M(+15.99)SPL	-	-	MEDSMDMDMSPL	R	Acetylation (Protein N-term); Oxidation (M); ethanolamine (DE); ethanolamine (DE); Oxidation (M); more	P06748	1619.62	12
1350	M(+42.01)(+15.99)E(+43.04)D(+43.04)SM(+15.99)DMD(+43.04)MSPL	-	-	MEDSMDMDMSPL	R	Acetylation (Protein N-term); Oxidation (M); ethanolamine (DE); ethanolamine (DE); Oxidation (M); more	P06748	1603.62	12
1351	M(+42.01)(+15.99)E(+43.04)D(+43.04)SMD(+43.04)M(+15.99)D(+43.04)MSPL	-	-	MEDSMDMDMSPL	R	Acetylation (Protein N-term); Oxidation (M); ethanolamine (DE); ethanolamine (DE); ethanolamine (DE); more	P06748	1646.67	12
1352	M(+42.01)(+15.99)E(+43.04)D(+43.04)SMD(+43.04)M(+15.99)DM(+15.99)SPL	-	-	MEDSMDMDMSPL	R	Acetylation (Protein N-term); Oxidation (M); ethanolamine (DE); ethanolamine (DE); ethanolamine (DE); more	P06748	1619.62	12
1353	M(+42.01)(+15.99)E(+43.04)D(+43.04)SMD(+43.04)MD(+43.04)M	-	-	MEDSMDMDM	S	Acetylation (Protein N-term); Oxidation (M); ethanolamine (DE); ethanolamine (DE); ethanolamine (DE); more	P06748	1333.5	9
1354	M(+42.01)(+15.99)E(+43.04)D(+43.04)SMD(+43.04)MD(+43.04)M(+15.99)SPL	-	-	MEDSMDMDMSPL	R	Acetylation (Protein N-term); Oxidation (M); ethanolamine (DE); ethanolamine (DE); ethanolamine (DE); more	P06748	1646.67	12
1355	M(+42.01)(+15.99)E(+43.04)D(+43.04)SMD(+43.04)MD(+43.04)MSPL	-	-	MEDSMDMDMSPL	R	Acetylation (Protein N-term); Oxidation (M); ethanolamine (DE); ethanolamine (DE); ethanolamine (DE); more	P06748	1630.67	12
1356	M(+42.01)(+15.99)E(+43.04)D(+43.04)SMD(+43.04)MDMSPL	-	-	MEDSMDMDMSPL	R	Acetylation (Protein N-term); Oxidation (M); ethanolamine (DE); ethanolamine (DE); ethanolamine (DE)	P06748	1587.63	12
1357	M(+42.01)(+15.99)E(+43.04)D(+43.04)SMDM(+15.99)D(+43.04)MSPL	-	-	MEDSMDMDMSPL	R	Acetylation (Protein N-term); Oxidation (M); ethanolamine (DE); ethanolamine (DE); Oxidation (M); more	P06748	1603.62	12
1358	M(+42.01)(+15.99)E(+43.04)D(+43.04)SMDMD(+43.04)M(+15.99)SPL	-	-	MEDSMDMDMSPL	R	Acetylation (Protein N-term); Oxidation (M); ethanolamine (DE); ethanolamine (DE); ethanolamine (DE); more	P06748	1603.62	12
1359	M(+42.01)(+15.99)E(+43.04)D(+43.04)SPLPD(+43.04)L	-	-	MEDSPLPDL	R	Acetylation (Protein N-term); Oxidation (M); ethanolamine (DE); ethanolamine (DE); ethanolamine (DE)	Q8IV03	1202.59	9
1360	M(+42.01)(+15.99)E(+43.04)D(+43.04)SQD(+43.04)LNE(+43.04)QSVK	-	-	MEDSQDLNEQSVK	K	Acetylation (Protein N-term); Oxidation (M); ethanolamine (DE); ethanolamine (DE); ethanolamine (DE); more	O95677	1751.84	13
1361	M(+42.01)(+15.99)E(+43.04)D(+43.04)YLQGC(+57.02)	-	-	MEDYLQGC	R	Acetylation (Protein N-term); Oxidation (M); ethanolamine (DE); ethanolamine (DE); Carbamidomethylation	Q86TP1	1158.47	8
1362	M(+42.01)(+15.99)E(+43.04)DPNPE(+43.04)E(+43.04)NM	-	-	MEDPNPEENM	K	Acetylation (Protein N-term); Oxidation (M); ethanolamine (DE); ethanolamine (DE); ethanolamine (DE)	Q9H609	1391.57	10
1363	M(+42.01)(+15.99)E(+43.04)DSM(+15.99)D(+43.04)M(+15.99)D(+43.04)MSPL	-	-	MEDSMDMDMSPL	R	Acetylation (Protein N-term); Oxidation (M); ethanolamine (DE); Oxidation (M); ethanolamine (DE); more	P06748	1619.62	12
1364	M(+42.01)(+15.99)E(+43.04)DSM(+15.99)D(+43.04)MD(+43.04)M(+15.99)SPL	-	-	MEDSMDMDMSPL	R	Acetylation (Protein N-term); Oxidation (M); ethanolamine (DE); Oxidation (M); ethanolamine (DE); more	P06748	1619.62	12
1365	M(+42.01)(+15.99)E(+43.04)DSM(+15.99)D(+43.04)MD(+43.04)MSPL	-	-	MEDSMDMDMSPL	R	Acetylation (Protein N-term); Oxidation (M); ethanolamine (DE); Oxidation (M); ethanolamine (DE); more	P06748	1603.62	12
1366	M(+42.01)(+15.99)E(+43.04)DSMD(+43.04)M(+15.99)D(+43.04)M(+15.99)SPL	-	-	MEDSMDMDMSPL	R	Acetylation (Protein N-term); Oxidation (M); ethanolamine (DE); ethanolamine (DE); Oxidation (M); more	P06748	1619.62	12
1367	M(+42.01)(+15.99)E(+43.04)DSMD(+43.04)M(+15.99)D(+43.04)MSPL	-	-	MEDSMDMDMSPL	R	Acetylation (Protein N-term); Oxidation (M); ethanolamine (DE); ethanolamine (DE); Oxidation (M); more	P06748	1603.62	12
1368	M(+42.01)(+15.99)E(+43.04)DSMD(+43.04)MD(+43.04)M(+15.99)SPL	-	-	MEDSMDMDMSPL	R	Acetylation (Protein N-term); Oxidation (M); ethanolamine (DE); ethanolamine (DE); ethanolamine (DE); more	P06748	1603.62	12
1369	M(+42.01)(+15.99)E(+43.04)DSMD(+43.04)MD(+43.04)MSPL	-	-	MEDSMDMDMSPL	R	Acetylation (Protein N-term); Oxidation (M); ethanolamine (DE); ethanolamine (DE); ethanolamine (DE)	P06748	1587.63	12
1370	M(+42.01)(+15.99)E(+43.04)E(+43.04)D(+43.04)QE(+43.04)LE(+43.04)	-，-	-，-	MEEDQELE	R，R	Acetylation (Protein N-term); Oxidation (M); ethanolamine (DE); ethanolamine (DE); ethanolamine (DE); more	P0DPB6，P0DPB5	1294.61	8
1371	M(+42.01)(+15.99)E(+43.04)E(+43.04)E(+43.04)GLE(+43.04)C(+57.02)PNSSSE(+43.04)	-	-	MEEEGLECPNSSSE	K	Acetylation (Protein N-term); Oxidation (M); ethanolamine (DE); ethanolamine (DE); ethanolamine (DE); more	Q7L7V1	1869.81	14
1372	M(+42.01)(+15.99)E(+43.04)E(+43.04)E(+43.04)LQHSHC(+57.02)VNC(+57.02)VS	-	-	MEEELQHSHCVNCVS	R	Acetylation (Protein N-term); Oxidation (M); ethanolamine (DE); ethanolamine (DE); ethanolamine (DE); more	Q8TB52	2044.88	15
1373	M(+42.01)(+15.99)E(+43.04)E(+43.04)E(+43.04)QD(+43.04)LPE(+43.04)QPV	-	-	MEEEQDLPEQPV	K	Acetylation (Protein N-term); Oxidation (M); ethanolamine (DE); ethanolamine (DE); ethanolamine (DE); more	Q99504	1715.84	12
1374	M(+42.01)(+15.99)E(+43.04)E(+43.04)E(+43.04)QD(+43.04)LPE(+43.04)QPVK	-	-	MEEEQDLPEQPVK	K	Acetylation (Protein N-term); Oxidation (M); ethanolamine (DE); ethanolamine (DE); ethanolamine (DE); more	Q99504	1843.93	13
1375	M(+42.01)(+15.99)E(+43.04)E(+43.04)GGRDKAPVQPQQSPAAAPGGTDE(+43.04)(+43.04)	-	-	MEEGGRDKAPVQPQQSPAAAPGGTDE	K	Acetylation (Protein N-term); Oxidation (M); ethanolamine (DE); ethanolamine (DE); ethanolamine (C-term); more	Q13200	2852.37	26
1376	M(+42.01)(+15.99)E(+43.04)E(+43.04)GHGLD(+43.04)LTYITE(+43.04)	-	-	MEEGHGLDLTYITE	R	Acetylation (Protein N-term); Oxidation (M); ethanolamine (DE); ethanolamine (DE); ethanolamine (DE); more	Q68CZ2	1836.89	14
1377	M(+42.01)(+15.99)E(+43.04)E(+43.04)LSAD(+43.04)E(+43.04)I	-	-	MEELSADEI	R	Acetylation (Protein N-term); Oxidation (M); ethanolamine (DE); ethanolamine (DE); ethanolamine (DE); more	O95155	1265.62	9
1378	M(+42.01)(+15.99)E(+43.04)E(+43.04)LVVE(+43.04)V	-	-	MEELVVEV	R	Acetylation (Protein N-term); Oxidation (M); ethanolamine (DE); ethanolamine (DE); ethanolamine (DE)	Q06787	1133.6	8
1379	M(+42.01)(+15.99)E(+43.04)E(+43.04)PQAGD(+43.04)AA	-	-	MEEPQAGDAA	R	Acetylation (Protein N-term); Oxidation (M); ethanolamine (DE); ethanolamine (DE); ethanolamine (DE)	O15446	1204.54	10
1380	M(+42.01)(+15.99)E(+43.04)E(+43.04)SGYE(+43.04)SVLC(+57.02)V	-	-	MEESGYESVLCV	K	Acetylation (Protein N-term); Oxidation (M); ethanolamine (DE); ethanolamine (DE); ethanolamine (DE); more	Q9NVZ3	1588.71	12
1381	M(+42.01)(+15.99)E(+43.04)E(+43.04)SVNQM(+15.99)QPLNE(+43.04)	-	-	MEESVNQMQPLNE	K	Acetylation (Protein N-term); Oxidation (M); ethanolamine (DE); ethanolamine (DE); Oxidation (M); more	P10155	1750.79	13
1382	M(+42.01)(+15.99)E(+43.04)E(+43.04)SVNQMQPLNE(+43.04)	-	-	MEESVNQMQPLNE	K	Acetylation (Protein N-term); Oxidation (M); ethanolamine (DE); ethanolamine (DE); ethanolamine (DE)	P10155	1734.79	13
1383	M(+42.01)(+15.99)E(+43.04)E(+43.04)VPHD(+43.04)C(+57.02)PGAD(+43.04)	-	-	MEEVPHDCPGAD	S	Acetylation (Protein N-term); Oxidation (M); ethanolamine (DE); ethanolamine (DE); ethanolamine (DE); more	P53384	1585.69	12
1384	M(+42.01)(+15.99)E(+43.04)E(+43.04)VPHD(+43.04)C(+57.02)PGAD(+43.04)S	-	-	MEEVPHDCPGADS	A	Acetylation (Protein N-term); Oxidation (M); ethanolamine (DE); ethanolamine (DE); ethanolamine (DE); more	P53384	1672.72	13
1385	M(+42.01)(+15.99)E(+43.04)E(+43.04)VPHD(+43.04)C(+57.02)PGAD(+43.04)SAQAG	-	-	MEEVPHDCPGADSAQAG	R	Acetylation (Protein N-term); Oxidation (M); ethanolamine (DE); ethanolamine (DE); ethanolamine (DE); more	P53384	1999.87	17
1386	M(+42.01)(+15.99)E(+43.04)E(+43.04)VPHD(+43.04)C(+57.02)PGADSAQAG	-	-	MEEVPHDCPGADSAQAG	R	Acetylation (Protein N-term); Oxidation (M); ethanolamine (DE); ethanolamine (DE); ethanolamine (DE); more	P53384	1956.83	17
1387	M(+42.01)(+15.99)E(+43.04)E(+43.04)VPHDC(+57.02)PGAD(+43.04)SAQAG	-	-	MEEVPHDCPGADSAQAG	R	Acetylation (Protein N-term); Oxidation (M); ethanolamine (DE); ethanolamine (DE); Carbamidomethylation; more	P53384	1956.83	17
1388	M(+42.01)(+15.99)E(+43.04)E(+43.04)VVIAGM(+15.99)SG	-	-	MEEVVIAGMSG	K	Acetylation (Protein N-term); Oxidation (M); ethanolamine (DE); ethanolamine (DE); Oxidation (M)	P49327	1281.59	11
1389	M(+42.01)(+15.99)E(+43.04)E(+43.04)VVIAGMSG	-	-	MEEVVIAGMSG	K	Acetylation (Protein N-term); Oxidation (M); ethanolamine (DE); ethanolamine (DE)	P49327	1265.6	11
1390	M(+42.01)(+15.99)E(+43.04)FAAE(+43.04)NE(+43.04)G	-	-	MEFAAENEG	K	Acetylation (Protein N-term); Oxidation (M); ethanolamine (DE); ethanolamine (DE); ethanolamine (DE)	Q9NWK9	1183.52	9
1391	M(+42.01)(+15.99)E(+43.04)FD(+43.04)C(+57.02)E(+43.04)GL	-	-	MEFDCEGL	R	Acetylation (Protein N-term); Oxidation (M); ethanolamine (DE); ethanolamine (DE); Carbamidomethylation; more	Q8IX04	1186.5	8
1392	M(+42.01)(+15.99)E(+43.04)FD(+43.04)LGAALE(+43.04)PTSQ	-	-	MEFDLGAALEPTSQ	K	Acetylation (Protein N-term); Oxidation (M); ethanolamine (DE); ethanolamine (DE); ethanolamine (DE)	Q9GZP8	1694.82	14
1393	M(+42.01)(+15.99)E(+43.04)FLLGNPFSTPVGQC(+57.02)LE(+43.04)	-	-	MEFLLGNPFSTPVGQCLE	K	Acetylation (Protein N-term); Oxidation (M); ethanolamine (DE); Carbamidomethylation; ethanolamine (DE)	Q6ZVM7	2182.04	18
1394	M(+42.01)(+15.99)E(+43.04)FPD(+43.04)LGAHC(+57.02)SE(+43.04)PSC(+57.02)Q	-	-	MEFPDLGAHCSEPSCQ	R	Acetylation (Protein N-term); Oxidation (M); ethanolamine (DE); ethanolamine (DE); Carbamidomethylation; more	Q8WV99	2050.85	16
1395	M(+42.01)(+15.99)E(+43.04)FQAVVM(+15.99)AVGGGS	-	-	MEFQAVVMAVGGGS	R	Acetylation (Protein N-term); Oxidation (M); ethanolamine (DE); Oxidation (M)	Q9NR50	1498.68	14
1396	M(+42.01)(+15.99)E(+43.04)FQAVVMAVGGGS	-	-	MEFQAVVMAVGGGS	R	Acetylation (Protein N-term); Oxidation (M); ethanolamine (DE)	Q9NR50	1482.68	14
1397	M(+42.01)(+15.99)E(+43.04)GAGE(+43.04)NAPE(+43.04)SSSSAPGSE(+43.04)E(+43.04)SA	-	-	MEGAGENAPESSSSAPGSEESA	R	Acetylation (Protein N-term); Oxidation (M); ethanolamine (DE); ethanolamine (DE); ethanolamine (DE); more	Q9BYX2	2353.03	22
1398	M(+42.01)(+15.99)E(+43.04)GAGE(+43.04)NAPE(+43.04)SSSSAPGSEE(+43.04)SA(+43.04)	-	-	MEGAGENAPESSSSAPGSEESA	R	Acetylation (Protein N-term); Oxidation (M); ethanolamine (DE); ethanolamine (DE); ethanolamine (DE); more	Q9BYX2	2353.03	22
1399	M(+42.01)(+15.99)E(+43.04)GC(+57.02)VSNL	-	-	MEGCVSNL	M	Acetylation (Protein N-term); Oxidation (M); ethanolamine (DE); Carbamidomethylation	O75832	1009.42	8
1400	M(+42.01)(+15.99)E(+43.04)GC(+57.02)VSNLM(+15.99)VC(+57.02)NL	-	-	MEGCVSNLMVCNL	A	Acetylation (Protein N-term); Oxidation (M); ethanolamine (DE); Carbamidomethylation; Oxidation (M); more	O75832	1642.68	13
1401	M(+42.01)(+15.99)E(+43.04)GC(+57.02)VSNLM(+15.99)VC(+57.02)NLAYSG	-	-	MEGCVSNLMVCNLAYSG	K	Acetylation (Protein N-term); Oxidation (M); ethanolamine (DE); Carbamidomethylation; Oxidation (M); more	O75832	2020.84	17
1402	M(+42.01)(+15.99)E(+43.04)GC(+57.02)VSNLMVC(+57.02)NL	-	-	MEGCVSNLMVCNL	A	Acetylation (Protein N-term); Oxidation (M); ethanolamine (DE); Carbamidomethylation; Carbamidomethylation	O75832	1626.69	13
1403	M(+42.01)(+15.99)E(+43.04)GGFGSD(+43.04)FGG	-	-	MEGGFGSDFGG	S	Acetylation (Protein N-term); Oxidation (M); ethanolamine (DE); ethanolamine (DE)	Q9Y5L4	1203.49	11
1404	M(+42.01)(+15.99)E(+43.04)GGFGSD(+43.04)FGGSGSG	-	-	MEGGFGSDFGGSGSG	K	Acetylation (Protein N-term); Oxidation (M); ethanolamine (DE); ethanolamine (DE)	Q9Y5L4	1491.59	15
1405	M(+42.01)(+15.99)E(+43.04)GGFGSDFGGSGSG	-	-	MEGGFGSDFGGSGSG	K	Acetylation (Protein N-term); Oxidation (M); ethanolamine (DE)	Q9Y5L4	1448.55	15
1406	M(+42.01)(+15.99)E(+43.04)GGGGIPLE(+43.04)TL	-	-	MEGGGGIPLETL	K	Acetylation (Protein N-term); Oxidation (M); ethanolamine (DE); ethanolamine (DE)	Q6P4H8	1316.66	12
1407	M(+42.01)(+15.99)E(+43.04)GGLAD(+43.04)GE(+43.04)PD(+43.04)	-	-	MEGGLADGEPD	R	Acetylation (Protein N-term); Oxidation (M); ethanolamine (DE); ethanolamine (DE); ethanolamine (DE); more	Q9BZF1	1319.6	11
1408	M(+42.01)(+15.99)E(+43.04)GGPAVC(+57.02)C(+57.02)QD(+43.04)P	-	-	MEGGPAVCCQDP	R	Acetylation (Protein N-term); Oxidation (M); ethanolamine (DE); Carbamidomethylation; Carbamidomethylation; more	Q8N5S9	1463.58	12
1409	M(+42.01)(+15.99)E(+43.04)GISNF	-	-	MEGISNF	K	Acetylation (Protein N-term); Oxidation (M); ethanolamine (DE)	Q96KB5	897.39	7
1410	M(+42.01)(+15.99)E(+43.04)GLD(+43.04)DGPD(+43.04)FLSE(+43.04)ED(+43.04)(+43.04)	-	M	MEGLDDGPDFLSEED	R	Acetylation (Protein N-term); Oxidation (M); ethanolamine (DE); ethanolamine (DE); ethanolamine (DE); more	Q9UNH7	1983.91	15
1411	M(+42.01)(+15.99)E(+43.04)GLTLSD(+43.04)AEQ(+43.04)	-	-	MEGLTLSDAEQ	K	Acetylation (Protein N-term); Oxidation (M); ethanolamine (DE); ethanolamine (DE); ethanolamine (C-term)	Q96D71	1379.66	11
1412	M(+42.01)(+15.99)E(+43.04)GPAE(+43.04)WGPE(+43.04)AALGPE(+43.04)AVL	-	-	MEGPAEWGPEAALGPEAVL	R	Acetylation (Protein N-term); Oxidation (M); ethanolamine (DE); ethanolamine (DE); ethanolamine (DE); more	Q53LP3	2153.08	19
1413	M(+42.01)(+15.99)E(+43.04)GPGLGSQC(+57.02)	-	-	MEGPGLGSQC	R	Acetylation (Protein N-term); Oxidation (M); ethanolamine (DE); Carbamidomethylation	Q8IUH4	1135.46	10
1414	M(+42.01)(+15.99)E(+43.04)GPLSVFGD(+43.04)	-	-	MEGPLSVFGD	R	Acetylation (Protein N-term); Oxidation (M); ethanolamine (DE); ethanolamine (DE)	P17987	1194.56	10
1415	M(+42.01)(+15.99)E(+43.04)GQSVE(+43.04)E(+43.04)LLA	-	-	MEGQSVEELLA	K	Acetylation (Protein N-term); Oxidation (M); ethanolamine (DE); ethanolamine (DE); ethanolamine (DE)	Q15050	1391.7	11
1416	M(+42.01)(+15.99)E(+43.04)GSASPPE(+43.04)KP	-	-	MEGSASPPEKP	R	Acetylation (Protein N-term); Oxidation (M); ethanolamine (DE); ethanolamine (DE)	Q96NT5	1272.6	11
1417	M(+42.01)(+15.99)E(+43.04)GSE(+43.04)PVAAHQGE(+43.04)E(+43.04)ASC(+57.02)SSWGTGSTN	-	-	MEGSEPVAAHQGEEASCSSWGTGSTN	K	Acetylation (Protein N-term); Oxidation (M); ethanolamine (DE); ethanolamine (DE); ethanolamine (DE); more	A0AVT1	2895.24	26
1418	M(+42.01)(+15.99)E(+43.04)GSGE(+43.04)QPGPQPQHPGD(+43.04)H	-	-	MEGSGEQPGPQPQHPGDH	R	Acetylation (Protein N-term); Oxidation (M); ethanolamine (DE); ethanolamine (DE); ethanolamine (DE)	Q9UJA5	2070.92	18
1419	M(+42.01)(+15.99)E(+43.04)GSGE(+43.04)QPGPQPQHPGDH(+43.04)	-	-	MEGSGEQPGPQPQHPGDH	R	Acetylation (Protein N-term); Oxidation (M); ethanolamine (DE); ethanolamine (DE); ethanolamine (C-term)	Q9UJA5	2070.92	18
1420	M(+42.01)(+15.99)E(+43.04)GSGGGAGE(+43.04)	-	-	MEGSGGGAGE	R	Acetylation (Protein N-term); Oxidation (M); ethanolamine (DE); ethanolamine (DE)	Q8N697	994.403	10
1421	M(+42.01)(+15.99)E(+43.04)HFLLE(+43.04)VAAAPL	-	-	MEHFLLEVAAAPL	R	Acetylation (Protein N-term); Oxidation (M); ethanolamine (DE); ethanolamine (DE)	Q9NU22	1583.84	13
1422	M(+42.01)(+15.99)E(+43.04)HIQGAW	-	-	MEHIQGAW	K	Acetylation (Protein N-term); Oxidation (M); ethanolamine (DE)	P04049	1071.48	8
1423	M(+42.01)(+15.99)E(+43.04)IE(+43.04)VSVAE(+43.04)C(+57.02)	-	-	MEIEVSVAEC	K	Acetylation (Protein N-term); Oxidation (M); ethanolamine (DE); ethanolamine (DE); ethanolamine (DE); more	Q9Y2D5	1352.63	10
1424	M(+42.01)(+15.99)E(+43.04)IGSAGPAGAQPLLMVP	-	-	MEIGSAGPAGAQPLLMVP	R	Acetylation (Protein N-term); Oxidation (M); ethanolamine (DE)	Q9H9G7	1838.93	18
1425	M(+42.01)(+15.99)E(+43.04)IGTE(+43.04)ISR	-	-	MEIGTEISR	K	Acetylation (Protein N-term); Oxidation (M); ethanolamine (DE); ethanolamine (DE)	Q6PJT7	1178.6	9
1426	M(+42.01)(+15.99)E(+43.04)IPPTNYPAS	-	-	MEIPPTNYPAS	R	Acetylation (Protein N-term); Oxidation (M); ethanolamine (DE)	Q9BS40	1319.61	11
1427	M(+42.01)(+15.99)E(+43.04)LAQE(+43.04)A	-	-	MELAQEA	R	Acetylation (Protein N-term); Oxidation (M); ethanolamine (DE); ethanolamine (DE)	O94927	934.443	7
1428	M(+42.01)(+15.99)E(+43.04)LE(+43.04)NIVANTVLL	-，-	-，-	MELENIVANTVLL	K，K	Acetylation (Protein N-term); Oxidation (M); ethanolamine (DE); ethanolamine (DE)	P43250，P34947	1601.87	13
1429	M(+42.01)(+15.99)E(+43.04)LGE(+43.04)LLYN	-	-	MELGELLYN	K	Acetylation (Protein N-term); Oxidation (M); ethanolamine (DE); ethanolamine (DE)	Q9BTE1	1224.61	9
1430	M(+42.01)(+15.99)E(+43.04)LITILE(+43.04)	-	-	MELITILE	K	Acetylation (Protein N-term); Oxidation (M); ethanolamine (DE); ethanolamine (DE)	Q14974	1104.61	8
1431	M(+42.01)(+15.99)E(+43.04)LLC(+57.02)C(+57.02)E(+43.04)GT	-	-	MELLCCEGT	R	Acetylation (Protein N-term); Oxidation (M); ethanolamine (DE); Carbamidomethylation; Carbamidomethylation; more	P30281	1255.52	9
1432	M(+42.01)(+15.99)E(+43.04)LLGE(+43.04)YVGQE(+43.04)GKPQ	-	-	MELLGEYVGQEGKPQ	K	Acetylation (Protein N-term); Oxidation (M); ethanolamine (DE); ethanolamine (DE); ethanolamine (DE)	Q9BXV9	1863.94	15
1433	M(+42.01)(+15.99)E(+43.04)LPSGPGPE(+43.04)	-	-	MELPSGPGPE	R	Acetylation (Protein N-term); Oxidation (M); ethanolamine (DE); ethanolamine (DE)	Q9Y679	1156.54	10
1434	M(+42.01)(+15.99)E(+43.04)LQPPE(+43.04)ASIAVVSIP	-	-	MELQPPEASIAVVSIP	R	Acetylation (Protein N-term); Oxidation (M); ethanolamine (DE); ethanolamine (DE)	P08195	1823.97	16
1435	M(+42.01)(+15.99)E(+43.04)LSD(+43.04)ANLQTLTE(+43.04)YL	-	-	MELSDANLQTLTEYL	K	Acetylation (Protein N-term); Oxidation (M); ethanolamine (DE); ethanolamine (DE); ethanolamine (DE)	P55060	1926.96	15
1436	M(+42.01)(+15.99)E(+43.04)M(+15.99)TE(+43.04)M(+15.99)TGVSL	-	-	MEMTEMTGVSL	K	Acetylation (Protein N-term); Oxidation (M); ethanolamine (DE); Oxidation (M); ethanolamine (DE); more	Q96PZ0	1403.6	11
1437	M(+42.01)(+15.99)E(+43.04)M(+15.99)TE(+43.04)MTGVSL	-	-	MEMTEMTGVSL	K	Acetylation (Protein N-term); Oxidation (M); ethanolamine (DE); Oxidation (M); ethanolamine (DE)	Q96PZ0	1387.6	11
1438	M(+42.01)(+15.99)E(+43.04)MTE(+43.04)M(+15.99)TGVSL	-	-	MEMTEMTGVSL	K	Acetylation (Protein N-term); Oxidation (M); ethanolamine (DE); ethanolamine (DE); Oxidation (M)	Q96PZ0	1387.6	11
1439	M(+42.01)(+15.99)E(+43.04)NE(+43.04)PD(+43.04)HE(+43.04)NVE(+43.04)QSLC(+57.02)A	-	-	MENEPDHENVEQSLCA	K	Acetylation (Protein N-term); Oxidation (M); ethanolamine (DE); ethanolamine (DE); ethanolamine (DE); more	Q8N3P4	2173.97	16
1440	M(+42.01)(+15.99)E(+43.04)NQVLTPHVYWAQ	-	-	MENQVLTPHVYWAQ	R	Acetylation (Protein N-term); Oxidation (M); ethanolamine (DE)	Q9P035	1815.86	14
1441	M(+42.01)(+15.99)E(+43.04)NSQLC(+57.02)	-	-	MENSQLC	K	Acetylation (Protein N-term); Oxidation (M); ethanolamine (DE); Carbamidomethylation	Q13151	981.39	7
1442	M(+42.01)(+15.99)E(+43.04)PAE(+43.04)QPSE(+43.04)LVSAE(+43.04)G	-	-	MEPAEQPSELVSAEG	R	Acetylation (Protein N-term); Oxidation (M); ethanolamine (DE); ethanolamine (DE); ethanolamine (DE); more	P47224	1802.87	15
1443	M(+42.01)(+15.99)E(+43.04)PAE(+43.04)QPSE(+43.04)LVSAE(+43.04)GRN	-	-	MEPAEQPSELVSAEGRN	R	Acetylation (Protein N-term); Oxidation (M); ethanolamine (DE); ethanolamine (DE); ethanolamine (DE); more	P47224	2073.02	17
1444	M(+42.01)(+15.99)E(+43.04)PAGPC(+57.02)GFC(+57.02)PAGE(+43.04)VQPA	-	-	MEPAGPCGFCPAGEVQPA	R	Acetylation (Protein N-term); Oxidation (M); ethanolamine (DE); Carbamidomethylation; Carbamidomethylation; more	Q9UHR6	2017.87	18
1445	M(+42.01)(+15.99)E(+43.04)PAME(+43.04)PE(+43.04)TLEA(+43.04)	-	-	MEPAMEPETLEA	R	Acetylation (Protein N-term); Oxidation (M); ethanolamine (DE); ethanolamine (DE); ethanolamine (DE); more	Q9UJY5	1576.75	12
1446	M(+42.01)(+15.99)E(+43.04)PAPGLVE(+43.04)QP	-	-	MEPAPGLVEQP	K	Acetylation (Protein N-term); Oxidation (M); ethanolamine (DE); ethanolamine (DE)	Q96EY9	1310.65	11
1447	M(+42.01)(+15.99)E(+43.04)PAPSE(+43.04)V	-	-	MEPAPSEV	R	Acetylation (Protein N-term); Oxidation (M); ethanolamine (DE); ethanolamine (DE)	Q9Y4R8	1002.47	8
1448	M(+42.01)(+15.99)E(+43.04)PAVGGPGPLIVNN	-	-	MEPAVGGPGPLIVNN	K	Acetylation (Protein N-term); Oxidation (M); ethanolamine (DE)	Q5VSL9	1564.79	15
1449	M(+42.01)(+15.99)E(+43.04)PAVSE(+43.04)PM	-	-	MEPAVSEPM	R	Acetylation (Protein N-term); Oxidation (M); ethanolamine (DE); ethanolamine (DE)	Q15738	1133.51	9
1450	M(+42.01)(+15.99)E(+43.04)PAVSE(+43.04)PM(+15.99)	-	-	MEPAVSEPM	R	Acetylation (Protein N-term); Oxidation (M); ethanolamine (DE); ethanolamine (DE); Oxidation (M)	Q15738	1149.5	9
1451	M(+42.01)(+15.99)E(+43.04)PE(+43.04)APR	-	-	MEPEAPR	R	Acetylation (Protein N-term); Oxidation (M); ethanolamine (DE); ethanolamine (DE)	P48163	972.47	7
1452	M(+42.01)(+15.99)E(+43.04)PE(+43.04)PVE(+43.04)D(+43.04)C(+57.02)VQSTL	-	-	MEPEPVEDCVQSTL	A	Acetylation (Protein N-term); Oxidation (M); ethanolamine (DE); ethanolamine (DE); ethanolamine (DE); more	Q8TER5	1862.88	14
1453	M(+42.01)(+15.99)E(+43.04)PE(+43.04)QM(+15.99)LE(+43.04)GQTQVAE(+43.04)N	-	-	MEPEQMLEGQTQVAEN	P	Acetylation (Protein N-term); Oxidation (M); ethanolamine (DE); ethanolamine (DE); Oxidation (M); more	Q9C005	2078.96	16
1454	M(+42.01)(+15.99)E(+43.04)PE(+43.04)QMLE(+43.04)GQTQVAE(+43.04)NPH	-	-	MEPEQMLEGQTQVAENPH	S	Acetylation (Protein N-term); Oxidation (M); ethanolamine (DE); ethanolamine (DE); ethanolamine (DE); more	Q9C005	2297.08	18
1455	M(+42.01)(+15.99)E(+43.04)PGPD(+43.04)GPAASGPAAI	-	-	MEPGPDGPAASGPAAI	R	Acetylation (Protein N-term); Oxidation (M); ethanolamine (DE); ethanolamine (DE)	P19623	1580.75	16
1456	M(+42.01)(+15.99)E(+43.04)PGPDGPAASGPAAI	-	-	MEPGPDGPAASGPAAI	R	Acetylation (Protein N-term); Oxidation (M); ethanolamine (DE)	P19623	1537.71	16
1457	M(+42.01)(+15.99)E(+43.04)PND(+43.04)STSTAVE(+43.04)E(+43.04)PD(+43.04)	-	-	MEPNDSTSTAVEEPD	S	Acetylation (Protein N-term); Oxidation (M); ethanolamine (DE); ethanolamine (DE); ethanolamine (DE); more	P46379	1893.86	15
1458	M(+42.01)(+15.99)E(+43.04)PPGGSLGPG	-	-	MEPPGGSLGPG	R	Acetylation (Protein N-term); Oxidation (M); ethanolamine (DE)	O60610	1098.5	11
1459	M(+42.01)(+15.99)E(+43.04)PPSC(+57.02)IQD(+43.04)E(+43.04)PFPHPLE(+43.04)PEPGVSAQPGPGKPSD(+43.04)(+43.04)	-	-	MEPPSCIQDEPFPHPLEPEPGVSAQPGPGKPSD	K	Acetylation (Protein N-term); Oxidation (M); ethanolamine (DE); Carbamidomethylation; ethanolamine (DE); more	O60343	3838.87	33
1460	M(+42.01)(+15.99)E(+43.04)PRPTAPSSGAPGLAGVGE(+43.04)TPSAAALAAA	-	-	MEPRPTAPSSGAPGLAGVGETPSAAALAAA	R	Acetylation (Protein N-term); Oxidation (M); ethanolamine (DE); ethanolamine (DE)	P55011	2848.44	30
1461	M(+42.01)(+15.99)E(+43.04)PSGSE(+43.04)QLFE(+43.04)D(+43.04)PD(+43.04)PGG	-	-	MEPSGSEQLFEDPDPGG	K	Acetylation (Protein N-term); Oxidation (M); ethanolamine (DE); ethanolamine (DE); ethanolamine (DE); more	O94876	2063.95	17
1462	M(+42.01)(+15.99)E(+43.04)PSSLE(+43.04)LPAD(+43.04)TVQ	-	-	MEPSSLELPADTVQ	R	Acetylation (Protein N-term); Oxidation (M); ethanolamine (DE); ethanolamine (DE); ethanolamine (DE)	Q16719	1702.84	14
1463	M(+42.01)(+15.99)E(+43.04)PSSLE(+43.04)LPADTVQ	-	-	MEPSSLELPADTVQ	R	Acetylation (Protein N-term); Oxidation (M); ethanolamine (DE); ethanolamine (DE)	Q16719	1659.8	14
1464	M(+42.01)(+15.99)E(+43.04)PVGC(+57.02)C(+57.02)GE(+43.04)C(+57.02)	-	-	MEPVGCCGEC	R	Acetylation (Protein N-term); Oxidation (M); ethanolamine (DE); Carbamidomethylation; Carbamidomethylation; more	Q8NEZ5	1341.48	10
1465	M(+42.01)(+15.99)E(+43.04)QLSSANT	-	-	MEQLSSANT	R	Acetylation (Protein N-term); Oxidation (M); ethanolamine (DE)	P30740	1080.48	9
1466	M(+42.01)(+15.99)E(+43.04)QPGAAASGAGGGSE(+43.04)E(+43.04)PGGG	-	-	MEQPGAAASGAGGGSEEPGGG	R	Acetylation (Protein N-term); Oxidation (M); ethanolamine (DE); ethanolamine (DE); ethanolamine (DE)	O60879	1959.86	21
1467	M(+42.01)(+15.99)E(+43.04)QPGAAASGAGGGSE(+43.04)E(+43.04)PGGGR	-	-	MEQPGAAASGAGGGSEEPGGGR	S	Acetylation (Protein N-term); Oxidation (M); ethanolamine (DE); ethanolamine (DE); ethanolamine (DE)	O60879	2115.96	22
1468	M(+42.01)(+15.99)E(+43.04)QSPPPAPE(+43.04)PTQGPTPA	-	-	MEQSPPPAPEPTQGPTPA	R	Acetylation (Protein N-term); Oxidation (M); ethanolamine (DE); ethanolamine (DE)	Q96AY4	1974.94	18
1469	M(+42.01)(+15.99)E(+43.04)QVNE(+43.04)L	-	-	MEQVNEL	K	Acetylation (Protein N-term); Oxidation (M); ethanolamine (DE); ethanolamine (DE)	P31948	1005.48	7
1470	M(+42.01)(+15.99)E(+43.04)QVNEL(+43.04)	-	-	MEQVNEL	K	Acetylation (Protein N-term); Oxidation (M); ethanolamine (DE); ethanolamine (C-term)	P31948	1005.48	7
1471	M(+42.01)(+15.99)E(+43.04)RPQPD(+43.04)SM(+15.99)PQD(+43.04)LSE(+43.04)AL	-	-	MERPQPDSMPQDLSEAL	K	Acetylation (Protein N-term); Oxidation (M); ethanolamine (DE); ethanolamine (DE); Oxidation (M); more	P09601	2189.05	17
1472	M(+42.01)(+15.99)E(+43.04)RPQPD(+43.04)SM(+15.99)PQD(+43.04)LSEAL(+43.04)	-	-	MERPQPDSMPQDLSEAL	K	Acetylation (Protein N-term); Oxidation (M); ethanolamine (DE); ethanolamine (DE); Oxidation (M); more	P09601	2189.05	17
1473	M(+42.01)(+15.99)E(+43.04)RPQPD(+43.04)SMPQD(+43.04)LSE(+43.04)AL	-	-	MERPQPDSMPQDLSEAL	K	Acetylation (Protein N-term); Oxidation (M); ethanolamine (DE); ethanolamine (DE); ethanolamine (DE); more	P09601	2173.05	17
1474	M(+42.01)(+15.99)E(+43.04)SAGLE(+43.04)QLL	-	-	MESAGLEQLL	R	Acetylation (Protein N-term); Oxidation (M); ethanolamine (DE); ethanolamine (DE)	Q8TEX9	1233.63	10
1475	M(+42.01)(+15.99)E(+43.04)SAIAE(+43.04)GGAS	-	-	MESAIAEGGAS	R	Acetylation (Protein N-term); Oxidation (M); ethanolamine (DE); ethanolamine (DE)	P78344	1165.53	11
1476	M(+42.01)(+15.99)E(+43.04)SE(+43.04)QLFH	-	-	MESEQLFH	R	Acetylation (Protein N-term); Oxidation (M); ethanolamine (DE); ethanolamine (DE)	P51790	1163.53	8
1477	M(+42.01)(+15.99)E(+43.04)SGSTAASE(+43.04)E(+43.04)A	-	-	MESGSTAASEEA	R	Acetylation (Protein N-term); Oxidation (M); ethanolamine (DE); ethanolamine (DE); ethanolamine (DE)	P10644	1355.59	12
1478	M(+42.01)(+15.99)E(+43.04)SGSTAASE(+43.04)EA(+43.04)	-	-	MESGSTAASEEA	R	Acetylation (Protein N-term); Oxidation (M); ethanolamine (DE); ethanolamine (DE); ethanolamine (C-term)	P10644	1355.59	12
1479	M(+42.01)(+15.99)E(+43.04)SGSTAASEEA(+43.04)	-	-	MESGSTAASEEA	R	Acetylation (Protein N-term); Oxidation (M); ethanolamine (DE); ethanolamine (C-term)	P10644	1312.55	12
1480	M(+42.01)(+15.99)E(+43.04)SIFHE(+43.04)	-	-	MESIFHE	K	Acetylation (Protein N-term); Oxidation (M); ethanolamine (DE); ethanolamine (DE)	P54252	1035.47	7
1481	M(+42.01)(+15.99)E(+43.04)SM(+15.99)FSSPAE(+43.04)AALQ	-	-	MESMFSSPAEAALQ	R	Acetylation (Protein N-term); Oxidation (M); ethanolamine (DE); Oxidation (M); ethanolamine (DE)	Q9BQC3	1657.73	14
1482	M(+42.01)(+15.99)E(+43.04)SMFSSPAE(+43.04)AALQ	-	-	MESMFSSPAEAALQ	R	Acetylation (Protein N-term); Oxidation (M); ethanolamine (DE); ethanolamine (DE)	Q9BQC3	1641.74	14
1483	M(+42.01)(+15.99)E(+43.04)SQE(+43.04)PTE(+43.04)SSQNG	-	-	MESQEPTESSQNG	K	Acetylation (Protein N-term); Oxidation (M); ethanolamine (DE); ethanolamine (DE); ethanolamine (DE)	Q9UKK9	1609.69	13
1484	M(+42.01)(+15.99)E(+43.04)SSPE(+43.04)SLQPLE(+43.04)HGVAAGPASGTGSSQE(+43.04)GLQET(+43.04)	-	-	MESSPESLQPLEHGVAAGPASGTGSSQEGLQET	R	Acetylation (Protein N-term); Oxidation (M); ethanolamine (DE); ethanolamine (DE); ethanolamine (DE); more	Q8NBR6	3540.7	33
1485	M(+42.01)(+15.99)E(+43.04)SY(+155.14)HKPD(+43.04)QQ	-	-	MESYHKPDQQ	K	Acetylation (Protein N-term); Oxidation (M); ethanolamine (DE); EDC(Y); ethanolamine (DE)	P29401	1560.77	10
1486	M(+42.01)(+15.99)E(+43.04)TAPKPG	-	-	METAPKPG	K	Acetylation (Protein N-term); Oxidation (M); ethanolamine (DE)	O15213	930.448	8
1487	M(+42.01)(+15.99)E(+43.04)TD(+43.04)E(+43.04)SPSPLPC(+57.02)GPAGE(+43.04)AVME(+43.04)S	-	-	METDESPSPLPCGPAGEAVMES	R	Acetylation (Protein N-term); Oxidation (M); ethanolamine (DE); ethanolamine (DE); ethanolamine (DE); more	Q8WYQ5	2563.16	22
1488	M(+42.01)(+15.99)E(+43.04)TE(+43.04)QPE(+43.04)E(+43.04)TFPN	-	-	METEQPEETFPN	T	Acetylation (Protein N-term); Oxidation (M); ethanolamine (DE); ethanolamine (DE); ethanolamine (DE); more	P61978	1680.77	12
1489	M(+42.01)(+15.99)E(+43.04)TE(+43.04)QPE(+43.04)E(+43.04)TFPNT	-	-	METEQPEETFPNT	E	Acetylation (Protein N-term); Oxidation (M); ethanolamine (DE); ethanolamine (DE); ethanolamine (DE); more	P61978	1781.81	13
1490	M(+42.01)(+15.99)E(+43.04)TE(+43.04)QPE(+43.04)E(+43.04)TFPNTETN(+43.04)	-	-	METEQPEETFPNTETN	G	Acetylation (Protein N-term); Oxidation (M); ethanolamine (DE); ethanolamine (DE); ethanolamine (DE); more	P61978	2168.99	16
1491	M(+42.01)(+15.99)E(+43.04)TE(+43.04)SGNQE(+43.04)	-	-	METESGNQE	K	Acetylation (Protein N-term); Oxidation (M); ethanolamine (DE); ethanolamine (DE); ethanolamine (DE)	Q4G0J3	1210.51	9
1492	M(+42.01)(+15.99)E(+43.04)TGTAPLVAPPR	-	-	METGTAPLVAPPR	R	Acetylation (Protein N-term); Oxidation (M); ethanolamine (DE)	Q4KMP7	1439.74	13
1493	M(+42.01)(+15.99)E(+43.04)TILE(+43.04)QQ	-	-	METILEQQ	R	Acetylation (Protein N-term); Oxidation (M); ethanolamine (DE); ethanolamine (DE)	Q12874	1134.56	8
1494	M(+42.01)(+15.99)E(+43.04)TM(+15.99)ASPGK	-	-	METMASPGK	D	Acetylation (Protein N-term); Oxidation (M); ethanolamine (DE); Oxidation (M)	O60684	1067.46	9
1495	M(+42.01)(+15.99)E(+43.04)TM(+15.99)ASPGKD(+43.04)NY	-	-	METMASPGKDNY	R	Acetylation (Protein N-term); Oxidation (M); ethanolamine (DE); Oxidation (M); ethanolamine (DE)	O60684	1502.64	12
1496	M(+42.01)(+15.99)E(+43.04)TM(+15.99)ASPGKDNY	-	-	METMASPGKDNY	R	Acetylation (Protein N-term); Oxidation (M); ethanolamine (DE); Oxidation (M)	O60684	1459.6	12
1497	M(+42.01)(+15.99)E(+43.04)TM(+15.99)ASPGKDNY(+43.04)	-	-	METMASPGKDNY	R	Acetylation (Protein N-term); Oxidation (M); ethanolamine (DE); Oxidation (M); ethanolamine (C-term)	O60684	1502.64	12
1498	M(+42.01)(+15.99)E(+43.04)TMASPGK	-	-	METMASPGK	D	Acetylation (Protein N-term); Oxidation (M); ethanolamine (DE)	O60684	1051.47	9
1499	M(+42.01)(+15.99)E(+43.04)TMASPGKD(+43.04)NY	-	-	METMASPGKDNY	R	Acetylation (Protein N-term); Oxidation (M); ethanolamine (DE); ethanolamine (DE)	O60684	1486.64	12
1500	M(+42.01)(+15.99)E(+43.04)TPPVNTIGE(+43.04)	-	-	METPPVNTIGE	K	Acetylation (Protein N-term); Oxidation (M); ethanolamine (DE); ethanolamine (DE)	Q9UIM3	1330.64	11
1501	M(+42.01)(+15.99)E(+43.04)TQLQSIFE(+43.04)E(+43.04)VV	-	-	METQLQSIFEEVV	K	Acetylation (Protein N-term); Oxidation (M); ethanolamine (DE); ethanolamine (DE); ethanolamine (DE)	Q9ULK4	1738.88	13
1502	M(+42.01)(+15.99)E(+43.04)VE(+43.04)AAE(+43.04)A	-	-	MEVEAAEA	R	Acetylation (Protein N-term); Oxidation (M); ethanolamine (DE); ethanolamine (DE); ethanolamine (DE)	Q96K58	1035.49	8
1503	M(+42.01)(+15.99)E(+43.04)VE(+43.04)AVC(+57.02)GGAGE(+43.04)VE(+43.04)AQD(+43.04)	-	-	MEVEAVCGGAGEVEAQD	S	Acetylation (Protein N-term); Oxidation (M); ethanolamine (DE); ethanolamine (DE); Carbamidomethylation; more	P35250	2022.93	17
1504	M(+42.01)(+15.99)E(+43.04)VE(+43.04)AVC(+57.02)GGAGE(+43.04)VE(+43.04)AQDSD(+43.04)PAPAFS	-	-	MEVEAVCGGAGEVEAQDSDPAPAFS	K	Acetylation (Protein N-term); Oxidation (M); ethanolamine (DE); ethanolamine (DE); Carbamidomethylation; more	P35250	2795.27	25
1505	M(+42.01)(+15.99)E(+43.04)VKPPPG	-	-	MEVKPPPG	R	Acetylation (Protein N-term); Oxidation (M); ethanolamine (DE)	P51991	954.484	8
1506	M(+42.01)(+15.99)E(+43.04)VKPPPGRPQPD(+43.04)SG	-	-	MEVKPPPGRPQPDSG	R	Acetylation (Protein N-term); Oxidation (M); ethanolamine (DE); ethanolamine (DE)	P51991	1734.87	15
1507	M(+42.01)(+15.99)E(+43.04)VKPPPGRPQPDSG(+43.04)	-	-	MEVKPPPGRPQPDSG	R	Acetylation (Protein N-term); Oxidation (M); ethanolamine (DE); ethanolamine (C-term)	P51991	1734.87	15
1508	M(+42.01)(+15.99)E(+43.04)VLAAE(+43.04)TTSQQE(+43.04)	-	-	MEVLAAETTSQQE	R	Acetylation (Protein N-term); Oxidation (M); ethanolamine (DE); ethanolamine (DE); ethanolamine (DE)	O75781	1622.78	13
1509	M(+42.01)(+15.99)E(+43.04)VM(+15.99)NLME(+43.04)QPI	-	-	MEVMNLMEQPI	K	Acetylation (Protein N-term); Oxidation (M); ethanolamine (DE); Oxidation (M); ethanolamine (DE)	P14923	1493.69	11
1510	M(+42.01)(+15.99)E(+43.04)VMNLME(+43.04)QPI	-	-	MEVMNLMEQPI	K	Acetylation (Protein N-term); Oxidation (M); ethanolamine (DE); ethanolamine (DE)	P14923	1477.7	11
1511	M(+42.01)(+15.99)E(+43.04)VSPLQPVNE(+43.04)NM(+15.99)QVN	-	-	MEVSPLQPVNENMQVN	K	Acetylation (Protein N-term); Oxidation (M); ethanolamine (DE); ethanolamine (DE); Oxidation (M)	P11388	1987.93	16
1512	M(+42.01)(+15.99)E(+43.04)VSPLQPVNE(+43.04)NMQVN	-	-	MEVSPLQPVNENMQVN	K	Acetylation (Protein N-term); Oxidation (M); ethanolamine (DE); ethanolamine (DE)	P11388	1971.94	16
1513	M(+42.01)(+15.99)E(+43.04)VVE(+43.04)AAAAQLE(+43.04)TL	-	-	MEVVEAAAAQLETL	K	Acetylation (Protein N-term); Oxidation (M); ethanolamine (DE); ethanolamine (DE); ethanolamine (DE)	Q96HR8	1660.87	14
1514	M(+42.01)(+15.99)E(+43.04)WGSE(+43.04)SAAVR	-	-	MEWGSESAAVR	R	Acetylation (Protein N-term); Oxidation (M); ethanolamine (DE); ethanolamine (DE)	Q7Z2K6	1365.63	11
1515	M(+42.01)(+15.99)E(+43.04)WVLAE(+43.04)ALLSQS	-	-	MEWVLAEALLSQS	R	Acetylation (Protein N-term); Oxidation (M); ethanolamine (DE); ethanolamine (DE)	Q13395	1619.82	13
1516	M(+42.01)(+15.99)E(+43.04)YM(+15.99)AE(+43.04)STD(+43.04)	-	-	MEYMAESTD	R	Acetylation (Protein N-term); Oxidation (M); ethanolamine (DE); Oxidation (M); ethanolamine (DE); more	Q96D46	1278.51	9
1517	M(+42.01)(+15.99)E(+43.04)YMAE(+43.04)STD(+43.04)	-	-	MEYMAESTD	R	Acetylation (Protein N-term); Oxidation (M); ethanolamine (DE); ethanolamine (DE); ethanolamine (DE)	Q96D46	1262.52	9
1518	M(+42.01)(+15.99)FE(+43.04)E(+43.04)PE(+43.04)WAE(+43.04)AAPVAAGLGPVIS	-	-	MFEEPEWAEAAPVAAGLGPVIS	R	Acetylation (Protein N-term); Oxidation (M); ethanolamine (DE); ethanolamine (DE); ethanolamine (DE); more	O43159	2500.27	22
1519	M(+42.01)(+15.99)FFTC(+57.02)GPNE(+43.04)AM(+15.99)VVSGFC(+57.02)	-	-	MFFTCGPNEAMVVSGFC	R	Acetylation (Protein N-term); Oxidation (M); Carbamidomethylation; ethanolamine (DE); Oxidation (M); more	O75955	2069.84	17
1520	M(+42.01)(+15.99)FFTC(+57.02)GPNE(+43.04)AMVVSGFC(+57.02)	-	-	MFFTCGPNEAMVVSGFC	R	Acetylation (Protein N-term); Oxidation (M); Carbamidomethylation; ethanolamine (DE); Carbamidomethylation	O75955	2053.84	17
1521	M(+42.01)(+15.99)FGAGD(+43.04)E(+43.04)D(+43.04)D(+43.04)TD(+43.04)FLSPSGGA	-	-	MFGAGDEDDTDFLSPSGGA	R	Acetylation (Protein N-term); Oxidation (M); ethanolamine (DE); ethanolamine (DE); ethanolamine (DE); more	Q5T1M5	2160.96	19
1522	M(+42.01)(+15.99)FHGIPATPGIGAPGN	-	-	MFHGIPATPGIGAPGN	K	Acetylation (Protein N-term); Oxidation (M)	Q9UK41	1593.76	16
1523	M(+42.01)(+15.99)FQAAGAAQATPSHD(+43.04)A	-	-	MFQAAGAAQATPSHDA	K	Acetylation (Protein N-term); Oxidation (M); ethanolamine (DE)	Q9BT23	1673.75	16
1524	M(+42.01)(+15.99)FQLPVNNLGSL	-	-	MFQLPVNNLGSL	R	Acetylation (Protein N-term); Oxidation (M)	Q9H2P0	1389.7	12
1525	M(+42.01)(+15.99)FQVPD(+43.04)SE(+43.04)GG	-	-	MFQVPDSEGG	R	Acetylation (Protein N-term); Oxidation (M); ethanolamine (DE); ethanolamine (DE)	Q9H910	1209.53	10
1526	M(+42.01)(+15.99)FQVPD(+43.04)SEGG	-	-	MFQVPDSEGG	R	Acetylation (Protein N-term); Oxidation (M); ethanolamine (DE)	Q9H910	1166.49	10
1527	M(+42.01)(+15.99)FQVPDSE(+43.04)GG	-	-	MFQVPDSEGG	R	Acetylation (Protein N-term); Oxidation (M); ethanolamine (DE)	Q9H910	1166.49	10
1528	M(+42.01)(+15.99)FSAGAE(+43.04)SLLHQA	-	-	MFSAGAESLLHQA	R	Acetylation (Protein N-term); Oxidation (M); ethanolamine (DE)	O43299	1461.69	13
1529	M(+42.01)(+15.99)FSE(+43.04)QAAQ	-	-	MFSEQAAQ	R	Acetylation (Protein N-term); Oxidation (M); ethanolamine (DE)	P49005	1011.43	8
1530	M(+42.01)(+15.99)FSFNMFD(+43.04)HPIP	-	-	MFSFNMFDHPIP	R	Acetylation (Protein N-term); Oxidation (M); ethanolamine (DE)	Q92890	1582.69	12
1531	M(+42.01)(+15.99)GAAPSPTQASS	-	-	MGAAPSPTQASS	R	Acetylation (Protein N-term); Oxidation (M)	Q9P2C4	1161.5	12
1532	M(+42.01)(+15.99)GD(+43.04)APSPEE(+43.04)(+43.04)	-	-	MGDAPSPEE	K	Acetylation (Protein N-term); Oxidation (M); ethanolamine (DE); ethanolamine (C-term); ethanolamine (DE)	P54577	1118.49	9
1533	M(+42.01)(+15.99)GGE(+43.04)QE(+43.04)E(+43.04)E(+43.04)	-	-	MGGEQEEE	R	Acetylation (Protein N-term); Oxidation (M); ethanolamine (DE); ethanolamine (DE); ethanolamine (DE); more	Q9Y266	1137.5	8
1534	M(+42.01)(+15.99)GKAAAAVAFG	-	-	MGKAAAAVAFG	A	Acetylation (Protein N-term); Oxidation (M)	Q8NEB5	1050.52	11
1535	M(+42.01)(+15.99)GNVLAASSPPAGPPP	-	-	MGNVLAASSPPAGPPP	P	Acetylation (Protein N-term); Oxidation (M)	O96008	1519.73	16
1536	M(+42.01)(+15.99)HFSIPE(+43.04)TES(+43.04)	-	-	MHFSIPETES	R	Acetylation (Protein N-term); Oxidation (M); ethanolamine (DE); ethanolamine (C-term)	Q15036	1320.6	10
1537	M(+42.01)(+15.99)HGGGPPSGD(+43.04)SAC(+57.02)PL	-	-	MHGGGPPSGDSACPL	R	Acetylation (Protein N-term); Oxidation (M); ethanolamine (DE); Carbamidomethylation	P24928	1539.64	15
1538	M(+42.01)(+15.99)HPAGLAAAAAGTP	-	-	MHPAGLAAAAAGTP	R	Acetylation (Protein N-term); Oxidation (M)	Q5BJH7	1292.62	14
1539	M(+42.01)(+15.99)HQPPE(+43.04)STAAAAAAAD(+43.04)ISA	-	-	MHQPPESTAAAAAAADISA	R	Acetylation (Protein N-term); Oxidation (M); ethanolamine (DE); ethanolamine (DE)	Q15714	1952.93	19
1540	M(+42.01)(+15.99)HSLATAAPVPTTLAQVD(+43.04)	-	-	MHSLATAAPVPTTLAQVD	R	Acetylation (Protein N-term); Oxidation (M); ethanolamine (DE)	Q92600	1922.98	18
1541	M(+42.01)(+15.99)HTGGE(+43.04)TSAC(+57.02)	-	-	MHTGGETSAC	K	Acetylation (Protein N-term); Oxidation (M); ethanolamine (DE); Carbamidomethylation	Q13627	1150.44	10
1542	M(+42.01)(+15.99)IATPLKHS(+43.04)	-	-	MIATPLKHS	R	Acetylation (Protein N-term); Oxidation (M); ethanolamine (C-term)	Q6P0N0	1097.59	9
1543	M(+42.01)(+15.99)IPIC(+57.02)PVVSFTYVPS	-	-	MIPICPVVSFTYVPS	R	Acetylation (Protein N-term); Oxidation (M); Carbamidomethylation	Q96KR1	1766.86	15
1544	M(+42.01)(+15.99)ISAAQLLD(+43.04)E(+43.04)L	-	-	MISAAQLLDEL	M	Acetylation (Protein N-term); Oxidation (M); ethanolamine (DE); ethanolamine (DE)	O95232	1346.71	11
1545	M(+42.01)(+15.99)ISAAQLLD(+43.04)E(+43.04)LM(+15.99)	-	-	MISAAQLLDELM	G	Acetylation (Protein N-term); Oxidation (M); ethanolamine (DE); ethanolamine (DE); Oxidation (M)	O95232	1493.75	12
1546	M(+42.01)(+15.99)ISAAQLLD(+43.04)E(+43.04)LM(+15.99)G	-	-	MISAAQLLDELMG	R	Acetylation (Protein N-term); Oxidation (M); ethanolamine (DE); ethanolamine (DE); Oxidation (M)	O95232	1550.77	13
1547	M(+42.01)(+15.99)ISAAQLLD(+43.04)E(+43.04)LM(+15.99)GR	-	-	MISAAQLLDELMGR	D	Acetylation (Protein N-term); Oxidation (M); ethanolamine (DE); ethanolamine (DE); Oxidation (M)	O95232	1706.87	14
1548	M(+42.01)(+15.99)ISAAQLLD(+43.04)E(+43.04)LM(+15.99)GRD(+43.04)	-	-	MISAAQLLDELMGRD	R	Acetylation (Protein N-term); Oxidation (M); ethanolamine (DE); ethanolamine (DE); Oxidation (M); more	O95232	1864.94	15
1549	M(+42.01)(+15.99)ISAAQLLD(+43.04)E(+43.04)LMGRD(+43.04)	-	-	MISAAQLLDELMGRD	R	Acetylation (Protein N-term); Oxidation (M); ethanolamine (DE); ethanolamine (DE); ethanolamine (DE)	O95232	1848.94	15
1550	M(+42.01)(+15.99)ITLITE(+43.04)QLQ	-	-	MITLITEQLQ	K	Acetylation (Protein N-term); Oxidation (M); ethanolamine (DE)	Q9NYF3	1289.69	10
1551	M(+42.01)(+15.99)IVAD(+43.04)SE(+43.04)C(+57.02)	-	-	MIVADSEC	R	Acetylation (Protein N-term); Oxidation (M); ethanolamine (DE); ethanolamine (DE); Carbamidomethylation	P58004	1067.46	8
1552	M(+42.01)(+15.99)LAE(+43.04)NLVE(+43.04)E(+43.04)FE(+43.04)M	-	-	MLAENLVEEFEM	K	Acetylation (Protein N-term); Oxidation (M); ethanolamine (DE); ethanolamine (DE); ethanolamine (DE); more	Q01850	1683.82	12
1553	M(+42.01)(+15.99)LAE(+43.04)NLVE(+43.04)E(+43.04)FEM(+15.99)(+43.04)	-	-	MLAENLVEEFEM	K	Acetylation (Protein N-term); Oxidation (M); ethanolamine (DE); ethanolamine (DE); ethanolamine (DE); more	Q01850	1699.82	12
1554	M(+42.01)(+15.99)LE(+43.04)APGPSD(+43.04)GC(+57.02)E(+43.04)LSNPSAS	-	-	MLEAPGPSDGCELSNPSAS	R	Acetylation (Protein N-term); Oxidation (M); ethanolamine (DE); ethanolamine (DE); Carbamidomethylation; more	Q9UNI6	2104.94	19
1555	M(+42.01)(+15.99)LE(+43.04)E(+43.04)LE(+43.04)C(+57.02)GAPGA	-	-	MLEELECGAPGA	R	Acetylation (Protein N-term); Oxidation (M); ethanolamine (DE); ethanolamine (DE); ethanolamine (DE); more	Q13111	1462.68	12
1556	M(+42.01)(+15.99)LGAPD(+43.04)E(+43.04)SSV	-	-	MLGAPDESSV	R	Acetylation (Protein N-term); Oxidation (M); ethanolamine (DE); ethanolamine (DE)	Q7Z4S6	1148.54	10
1557	M(+42.01)(+15.99)LGPE(+43.04)GGE(+43.04)GFVV	-	M	MLGPEGGEGFVV	K	Acetylation (Protein N-term); Oxidation (M); ethanolamine (DE); ethanolamine (DE)	P52597	1334.65	12
1558	M(+42.01)(+15.99)LGPE(+43.04)GGEGFVV	-	M	MLGPEGGEGFVV	K	Acetylation (Protein N-term); Oxidation (M); ethanolamine (DE)	P52597	1291.61	12
1559	M(+42.01)(+15.99)LGTE(+43.04)GGE(+43.04)GFVV	-	M	MLGTEGGEGFVV	K	Acetylation (Protein N-term); Oxidation (M); ethanolamine (DE); ethanolamine (DE)	P31943	1338.65	12
1560	M(+42.01)(+15.99)LHLSAAPPAPPPE(+43.04)VTATA	-	-	MLHLSAAPPAPPPEVTATA	R	Acetylation (Protein N-term); Oxidation (M); ethanolamine (DE)	Q12769	1971.01	19
1561	M(+42.01)(+15.99)LLFVE(+43.04)QVAS	-	-	MLLFVEQVAS	K	Acetylation (Protein N-term); Oxidation (M); ethanolamine (DE)	Q71RC2	1236.64	10
1562	M(+42.01)(+15.99)LQNVTPHN	-	-	MLQNVTPHN	K	Acetylation (Protein N-term); Oxidation (M)	P25440	1110.51	9
1563	M(+42.01)(+15.99)LQQVPE(+43.04)NINFPAE(+43.04)EE(+43.04)(+43.04)	-	-	MLQQVPENINFPAEEE	K	Acetylation (Protein N-term); Oxidation (M); ethanolamine (DE); ethanolamine (DE); ethanolamine (C-term); more	P41252	2117.05	16
1564	M(+42.01)(+15.99)M(+15.99)C(+57.02)GAPSATQPATAE(+43.04)TQH	-	-	MMCGAPSATQPATAETQH	I	Acetylation (Protein N-term); Oxidation (M); Oxidation (M); Carbamidomethylation; ethanolamine (DE)	P04080	2004.83	18
1565	M(+42.01)(+15.99)M(+15.99)C(+57.02)GAPSATQPATAE(+43.04)TQHIAD(+43.04)	-	-	MMCGAPSATQPATAETQHIAD	Q	Acetylation (Protein N-term); Oxidation (M); Oxidation (M); Carbamidomethylation; ethanolamine (DE); more	P04080	2347.02	21
1566	M(+42.01)(+15.99)M(+15.99)C(+57.02)GAPSATQPATAE(+43.04)TQHIAD(+43.04)QV	-	-	MMCGAPSATQPATAETQHIADQV	R	Acetylation (Protein N-term); Oxidation (M); Oxidation (M); Carbamidomethylation; ethanolamine (DE); more	P04080	2574.15	23
1567	M(+42.01)(+15.99)M(+15.99)C(+57.02)GAPSATQPATAE(+43.04)TQHIADQV(+43.04)	-	-	MMCGAPSATQPATAETQHIADQV	R	Acetylation (Protein N-term); Oxidation (M); Oxidation (M); Carbamidomethylation; ethanolamine (DE); more	P04080	2574.15	23
1568	M(+42.01)(+15.99)M(+15.99)GE(+43.04)AAVAAGPC(+57.02)PL	-	-	MMGEAAVAAGPCPL	R	Acetylation (Protein N-term); Oxidation (M); Oxidation (M); ethanolamine (DE); Carbamidomethylation	Q9Y664	1490.66	14
1569	M(+42.01)(+15.99)M(+15.99)HPVASSNPAFC(+57.02)GPGKPSC(+57.02)LNE(+43.04)D(+43.04)AM	-	-	MMHPVASSNPAFCGPGKPSCLNEDAM	R	Acetylation (Protein N-term); Oxidation (M); Oxidation (M); Carbamidomethylation; Carbamidomethylation; more	Q7Z6I8	2964.27	26
1570	M(+42.01)(+15.99)M(+15.99)HPVASSNPAFC(+57.02)GPGKPSC(+57.02)LNE(+43.04)D(+43.04)AM(+15.99)	-	-	MMHPVASSNPAFCGPGKPSCLNEDAM	R	Acetylation (Protein N-term); Oxidation (M); Oxidation (M); Carbamidomethylation; Carbamidomethylation; more	Q7Z6I8	2980.26	26
1571	M(+42.01)(+15.99)M(+15.99)HPVASSNPAFC(+57.02)GPGKPSC(+57.02)LNE(+43.04)DAM(+15.99)(+43.04)	-	-	MMHPVASSNPAFCGPGKPSCLNEDAM	R	Acetylation (Protein N-term); Oxidation (M); Oxidation (M); Carbamidomethylation; Carbamidomethylation; more	Q7Z6I8	2980.26	26
1572	M(+42.01)(+15.99)M(+15.99)LGPE(+43.04)GGE(+43.04)GFVV	-	-	MMLGPEGGEGFVV	K	Acetylation (Protein N-term); Oxidation (M); Oxidation (M); ethanolamine (DE); ethanolamine (DE)	P52597	1481.69	13
1573	M(+42.01)(+15.99)M(+15.99)LGTE(+43.04)GGE(+43.04)GFVV	-	-	MMLGTEGGEGFVV	K	Acetylation (Protein N-term); Oxidation (M); Oxidation (M); ethanolamine (DE); ethanolamine (DE)	P31943	1485.68	13
1574	M(+42.01)(+15.99)M(+15.99)PTPVILL	-	-	MMPTPVILL	K	Acetylation (Protein N-term); Oxidation (M); Oxidation (M)	Q99832	1087.57	9
1575	M(+42.01)(+15.99)M(+15.99)QGE(+43.04)AHPSASLID(+43.04)	-	-	MMQGEAHPSASLID	R	Acetylation (Protein N-term); Oxidation (M); Oxidation (M); ethanolamine (DE); ethanolamine (DE)	Q96SK2	1645.74	14
1576	M(+42.01)(+15.99)M(+15.99)TSVSSD(+43.04)HC(+57.02)	-	-	MMTSVSSDHC	R	Acetylation (Protein N-term); Oxidation (M); Oxidation (M); ethanolamine (DE); Carbamidomethylation	Q5T6F2	1270.46	10
1577	M(+42.01)(+15.99)MC(+57.02)GAPSATQPATAE(+43.04)TQ	-	-	MMCGAPSATQPATAETQ	H	Acetylation (Protein N-term); Oxidation (M); Carbamidomethylation; ethanolamine (DE)	P04080	1851.78	17
1578	M(+42.01)(+15.99)MC(+57.02)GAPSATQPATAE(+43.04)TQHIAD(+43.04)	-	-	MMCGAPSATQPATAETQHIAD	Q	Acetylation (Protein N-term); Oxidation (M); Carbamidomethylation; ethanolamine (DE); ethanolamine (DE)	P04080	2331.03	21
1579	M(+42.01)(+15.99)MC(+57.02)GAPSATQPATAE(+43.04)TQHIAD(+43.04)QV	-	-	MMCGAPSATQPATAETQHIADQV	R	Acetylation (Protein N-term); Oxidation (M); Carbamidomethylation; ethanolamine (DE); ethanolamine (DE)	P04080	2558.16	23
1580	M(+42.01)(+15.99)MC(+57.02)GAPSATQPATAE(+43.04)TQHIADQV	-	-	MMCGAPSATQPATAETQHIADQV	R	Acetylation (Protein N-term); Oxidation (M); Carbamidomethylation; ethanolamine (DE)	P04080	2515.11	23
1581	M(+42.01)(+15.99)MC(+57.02)GAPSATQPATAE(+43.04)TQHIADQV(+43.04)	-	-	MMCGAPSATQPATAETQHIADQV	R	Acetylation (Protein N-term); Oxidation (M); Carbamidomethylation; ethanolamine (DE); ethanolamine (C-term)	P04080	2558.16	23
1582	M(+42.01)(+15.99)MHPVASSNPAFC(+57.02)GPGKPSC(+57.02)LNE(+43.04)D(+43.04)AM(+15.99)	-	-	MMHPVASSNPAFCGPGKPSCLNEDAM	R	Acetylation (Protein N-term); Oxidation (M); Carbamidomethylation; Carbamidomethylation; ethanolamine (DE); more	Q7Z6I8	2964.27	26
1583	M(+42.01)(+15.99)MIHGFQSSH	-	-	MMIHGFQSSH	R	Acetylation (Protein N-term); Oxidation (M)	O75663	1231.51	10
1584	M(+42.01)(+15.99)MLGPE(+43.04)GGE(+43.04)GFVV	-	-	MMLGPEGGEGFVV	K	Acetylation (Protein N-term); Oxidation (M); ethanolamine (DE); ethanolamine (DE)	P52597	1465.69	13
1585	M(+42.01)(+15.99)MLGTE(+43.04)GGE(+43.04)GF	-	-	MMLGTEGGEGF	V	Acetylation (Protein N-term); Oxidation (M); ethanolamine (DE); ethanolamine (DE)	P31943	1271.55	11
1586	M(+42.01)(+15.99)MLGTE(+43.04)GGE(+43.04)GFVV	-	-	MMLGTEGGEGFVV	K	Acetylation (Protein N-term); Oxidation (M); ethanolamine (DE); ethanolamine (DE)	P31943	1469.69	13
1587	M(+42.01)(+15.99)MLGTE(+43.04)GGEGFVV	-	-	MMLGTEGGEGFVV	K	Acetylation (Protein N-term); Oxidation (M); ethanolamine (DE)	P31943	1426.65	13
1588	M(+42.01)(+15.99)MLGTEGGE(+43.04)GFVV	-	-	MMLGTEGGEGFVV	K	Acetylation (Protein N-term); Oxidation (M); ethanolamine (DE)	P31943	1426.65	13
1589	M(+42.01)(+15.99)MPTPVILL	-	-	MMPTPVILL	K	Acetylation (Protein N-term); Oxidation (M)	Q99832	1071.57	9
1590	M(+42.01)(+15.99)MTSVSSD(+43.04)HC(+57.02)	-	-	MMTSVSSDHC	R	Acetylation (Protein N-term); Oxidation (M); ethanolamine (DE); Carbamidomethylation	Q5T6F2	1254.47	10
1591	M(+42.01)(+15.99)NAGPGC(+57.02)E(+43.04)PC(+57.02)T	-	-	MNAGPGCEPCT	K	Acetylation (Protein N-term); Oxidation (M); Carbamidomethylation; ethanolamine (DE); Carbamidomethylation	Q86W56	1293.48	11
1592	M(+42.01)(+15.99)NAGSD(+43.04)PVVIVSAA	-	-	MNAGSDPVVIVSAA	R	Acetylation (Protein N-term); Oxidation (M); ethanolamine (DE)	Q9BWD1	1430.71	14
1593	M(+42.01)(+15.99)NHD(+43.04)FQALALE(+43.04)S	-	-	MNHDFQALALES	R	Acetylation (Protein N-term); Oxidation (M); ethanolamine (DE); ethanolamine (DE)	Q8TB72	1518.71	12
1594	M(+42.01)(+15.99)NHIVQTFSPVNSGQPPNYE(+43.04)M(+15.99)L	-	-	MNHIVQTFSPVNSGQPPNYEML	K	Acetylation (Protein N-term); Oxidation (M); ethanolamine (DE); Oxidation (M)	Q01629	2619.21	22
1595	M(+42.01)(+15.99)NHIVQTFSPVNSGQPPNYE(+43.04)ML	-	-	MNHIVQTFSPVNSGQPPNYEML	K	Acetylation (Protein N-term); Oxidation (M); ethanolamine (DE)	Q01629	2603.21	22
1596	M(+42.01)(+15.99)NHTVQTFFSPVN	-，-	-，-	MNHTVQTFFSPVN	S，S	Acetylation (Protein N-term); Oxidation (M)	Q01628，C9JQL5	1578.71	13
1597	M(+42.01)(+15.99)NHTVQTFFSPVNSGQPPNYE(+43.04)M(+15.99)L	-，-	-，-	MNHTVQTFFSPVNSGQPPNYEML	K，K	Acetylation (Protein N-term); Oxidation (M); ethanolamine (DE); Oxidation (M)	Q01628，C9JQL5	2754.24	23
1598	M(+42.01)(+15.99)NHTVQTFFSPVNSGQPPNYEM(+15.99)L(+43.04)	-，-	-，-	MNHTVQTFFSPVNSGQPPNYEML	K，K	Acetylation (Protein N-term); Oxidation (M); Oxidation (M); ethanolamine (C-term)	Q01628，C9JQL5	2754.24	23
1599	M(+42.01)(+15.99)NLLPNIE(+43.04)SPVT	-	-	MNLLPNIESPVT	R	Acetylation (Protein N-term); Oxidation (M); ethanolamine (DE)	P17980	1427.73	12
1600	M(+42.01)(+15.99)NNSGAD(+43.04)E(+43.04)IG	-	-	MNNSGADEIG	K	Acetylation (Protein N-term); Oxidation (M); ethanolamine (DE); ethanolamine (DE)	Q96EP5	1150.49	10
1601	M(+42.01)(+15.99)NPE(+43.04)SSIFIE(+43.04)D(+43.04)YL	-	-	MNPESSIFIEDYL	K	Acetylation (Protein N-term); Oxidation (M); ethanolamine (DE); ethanolamine (DE); ethanolamine (DE)	Q9BQE5	1743.84	13
1602	M(+42.01)(+15.99)NPE(+43.04)YD(+43.04)YLF	S，-	S，-	MNPEYDYLF	K，K	Acetylation (Protein N-term); Oxidation (M); ethanolamine (DE); ethanolamine (DE)	P62820，Q9H0U4	1334.59	9
1603	M(+42.01)(+15.99)NPIVVVHGGGAGPIS	-	-	MNPIVVVHGGGAGPIS	K	Acetylation (Protein N-term); Oxidation (M)	Q7L266	1561.79	16
1604	M(+42.01)(+15.99)NPSAPSYPM	-	-	MNPSAPSYPM	A	Acetylation (Protein N-term); Oxidation (M)	P11940	1151.46	10
1605	M(+42.01)(+15.99)NPSAPSYPM(+15.99)A	-	-	MNPSAPSYPMA	S	Acetylation (Protein N-term); Oxidation (M); Oxidation (M)	P11940	1238.49	11
1606	M(+42.01)(+15.99)NPSAPSYPM(+15.99)ASLYVGD(+43.04)	-	-	MNPSAPSYPMASLYVGD	L	Acetylation (Protein N-term); Oxidation (M); Oxidation (M); ethanolamine (DE)	P11940	1915.83	17
1607	M(+42.01)(+15.99)NPSAPSYPMA	-	-	MNPSAPSYPMA	S	Acetylation (Protein N-term); Oxidation (M)	P11940	1222.5	11
1608	M(+42.01)(+15.99)NPSAPSYPMASLYVGD(+43.04)LHPD(+43.04)VTE(+43.04)AM(+15.99)LYE(+43.04)	-	-	MNPSAPSYPMASLYVGDLHPDVTEAMLYE	K	Acetylation (Protein N-term); Oxidation (M); ethanolamine (DE); ethanolamine (DE); ethanolamine (DE); more	P11940	3443.61	29
1609	M(+42.01)(+15.99)NPSAPSYPMASLYVGD(+43.04)LHPD(+43.04)VTE(+43.04)AMLYE(+43.04)	-	-	MNPSAPSYPMASLYVGDLHPDVTEAMLYE	K	Acetylation (Protein N-term); Oxidation (M); ethanolamine (DE); ethanolamine (DE); ethanolamine (DE); more	P11940	3427.61	29
1610	M(+42.01)(+15.99)NPVYSPGSSGVPYANA	-	-	MNPVYSPGSSGVPYANA	K	Acetylation (Protein N-term); Oxidation (M)	A1KXE4	1767.78	17
1611	M(+42.01)(+15.99)NPVYSPVQPGAPYGNP	-	-	MNPVYSPVQPGAPYGNP	K	Acetylation (Protein N-term); Oxidation (M)	Q92567	1844.84	17
1612	M(+42.01)(+15.99)NSNVE(+43.04)NLPPHII	-	-	MNSNVENLPPHII	R	Acetylation (Protein N-term); Oxidation (M); ethanolamine (DE)	Q16763	1577.79	13
1613	M(+42.01)(+15.99)NSPVD(+43.04)PGA	-	-	MNSPVDPGA	R	Acetylation (Protein N-term); Oxidation (M); ethanolamine (DE)	Q8TEU7	987.433	9
1614	M(+42.01)(+15.99)NSSD(+43.04)EE(+43.04)(+43.04)	-	-	MNSSDEE	K	Acetylation (Protein N-term); Oxidation (M); ethanolamine (DE); ethanolamine (C-term); ethanolamine (DE)	A0MZ66	997.402	7
1615	M(+42.01)(+15.99)NVD(+43.04)HE(+43.04)VNLLVE(+43.04)E(+43.04)IH	-	-	MNVDHEVNLLVEEIH	R	Acetylation (Protein N-term); Oxidation (M); ethanolamine (DE); ethanolamine (DE); ethanolamine (DE); more	Q9P1F3	2020.04	15
1616	M(+42.01)(+15.99)NVDHE(+43.04)VNLLVE(+43.04)E(+43.04)IH	-	-	MNVDHEVNLLVEEIH	R	Acetylation (Protein N-term); Oxidation (M); ethanolamine (DE); ethanolamine (DE); ethanolamine (DE)	Q9P1F3	1977	15
1617	M(+42.01)(+15.99)NVGTAHSE(+43.04)VNPNT	-	-	MNVGTAHSEVNPNT	R	Acetylation (Protein N-term); Oxidation (M); ethanolamine (DE)	Q8N138	1570.7	14
1618	M(+42.01)(+15.99)NVGVAHSE(+43.04)VNPNT	-，-	-，-	MNVGVAHSEVNPNT	R，R	Acetylation (Protein N-term); Oxidation (M); ethanolamine (DE)	Q53FV1，Q9P0S3	1568.73	14
1619	M(+42.01)(+15.99)NVTSLFSFTSPAVK	-	-	MNVTSLFSFTSPAVK	R	Acetylation (Protein N-term); Oxidation (M)	Q15797	1685.83	15
1620	M(+42.01)(+15.99)NYM(+15.99)PGTASLIE(+43.04)D(+43.04)IDK(+43.04)	-	-	MNYMPGTASLIEDIDK	K	Acetylation (Protein N-term); Oxidation (M); Oxidation (M); ethanolamine (DE); ethanolamine (DE); more	O15116	1999.96	16
1621	M(+42.01)(+15.99)QAALE(+43.04)VTA	-	-	MQAALEVTA	R	Acetylation (Protein N-term); Oxidation (M); ethanolamine (DE)	Q9BSY4	1033.51	9
1622	M(+42.01)(+15.99)QAHE(+43.04)LF	-	-	MQAHELF	R	Acetylation (Protein N-term); Oxidation (M); ethanolamine (DE)	P33121	975.448	7
1623	M(+42.01)(+15.99)QD(+43.04)AE(+43.04)NVAVPE(+43.04)AAEE(+43.04)	-	-	MQDAENVAVPEAAEE	R	Acetylation (Protein N-term); Oxidation (M); ethanolamine (DE); ethanolamine (DE); ethanolamine (DE); more	P55884	1831.86	15
1624	M(+42.01)(+15.99)QD(+43.04)AE(+43.04)NVAVPE(+43.04)AAEE(+43.04)(+43.04)	-	-	MQDAENVAVPEAAEE	R	Acetylation (Protein N-term); Oxidation (M); ethanolamine (DE); ethanolamine (DE); ethanolamine (DE); more	P55884	1874.9	15
1625	M(+42.01)(+15.99)QD(+43.04)AENVAVPE(+43.04)AAEE(+43.04)(+43.04)	-	-	MQDAENVAVPEAAEE	R	Acetylation (Protein N-term); Oxidation (M); ethanolamine (DE); ethanolamine (DE); ethanolamine (C-term); more	P55884	1831.86	15
1626	M(+42.01)(+15.99)QDAE(+43.04)NVAVPE(+43.04)AAE(+43.04)E(+43.04)	-	-	MQDAENVAVPEAAEE	R	Acetylation (Protein N-term); Oxidation (M); ethanolamine (DE); ethanolamine (DE); ethanolamine (DE); more	P55884	1831.86	15
1627	M(+42.01)(+15.99)QDAE(+43.04)NVAVPE(+43.04)AAEE(+43.04)(+43.04)	-	-	MQDAENVAVPEAAEE	R	Acetylation (Protein N-term); Oxidation (M); ethanolamine (DE); ethanolamine (DE); ethanolamine (C-term); more	P55884	1831.86	15
1628	M(+42.01)(+15.99)QE(+43.04)IIASVD(+43.04)HI	-	-	MQEIIASVDHI	K	Acetylation (Protein N-term); Oxidation (M); ethanolamine (DE); ethanolamine (DE)	O95639	1398.72	11
1629	M(+42.01)(+15.99)QGE(+43.04)AHPSASLID(+43.04)	-	M	MQGEAHPSASLID	R	Acetylation (Protein N-term); Oxidation (M); ethanolamine (DE); ethanolamine (DE)	Q96SK2	1498.71	13
1630	M(+42.01)(+15.99)QGGE(+43.04)PVSTM	-	-	MQGGEPVSTM	K	Acetylation (Protein N-term); Oxidation (M); ethanolamine (DE)	Q9BXB4	1136.48	10
1631	M(+42.01)(+15.99)QGGE(+43.04)PVSTM(+15.99)	-	-	MQGGEPVSTM	K	Acetylation (Protein N-term); Oxidation (M); ethanolamine (DE); Oxidation (M)	Q9BXB4	1152.48	10
1632	M(+42.01)(+15.99)QHVSSSQSSQ	-	-	MQHVSSSQSSQ	R	Acetylation (Protein N-term); Oxidation (M)	Q6ZTU2	1262.52	11
1633	M(+42.01)(+15.99)QLTHQLD(+43.04)LFPE(+43.04)C(+57.02)	-	-	MQLTHQLDLFPEC	R	Acetylation (Protein N-term); Oxidation (M); ethanolamine (DE); ethanolamine (DE); Carbamidomethylation	Q9Y3C4	1774.84	13
1634	M(+42.01)(+15.99)QND(+43.04)AGE(+43.04)FVD(+43.04)L	-	-	MQNDAGEFVDL	Y	Acetylation (Protein N-term); Oxidation (M); ethanolamine (DE); ethanolamine (DE); ethanolamine (DE)	P63220	1424.66	11
1635	M(+42.01)(+15.99)QND(+43.04)AGE(+43.04)FVD(+43.04)LYVP	-	-	MQNDAGEFVDLYVP	R	Acetylation (Protein N-term); Oxidation (M); ethanolamine (DE); ethanolamine (DE); ethanolamine (DE)	P63220	1783.85	14
1636	M(+42.01)(+15.99)QND(+43.04)AGE(+43.04)FVD(+43.04)LYVPR	-	-	MQNDAGEFVDLYVPR	K	Acetylation (Protein N-term); Oxidation (M); ethanolamine (DE); ethanolamine (DE); ethanolamine (DE)	P63220	1939.95	15
1637	M(+42.01)(+15.99)QND(+43.04)AGE(+43.04)FVDLY(+155.14)VP	-	-	MQNDAGEFVDLYVP	R	Acetylation (Protein N-term); Oxidation (M); ethanolamine (DE); ethanolamine (DE); EDC(Y)	P63220	1895.95	14
1638	M(+42.01)(+15.99)QND(+43.04)AGE(+43.04)FVDLYVP	-	-	MQNDAGEFVDLYVP	R	Acetylation (Protein N-term); Oxidation (M); ethanolamine (DE); ethanolamine (DE)	P63220	1740.8	14
1639	M(+42.01)(+15.99)QND(+43.04)AGE(+43.04)FVDLYVPR	-	-	MQNDAGEFVDLYVPR	K	Acetylation (Protein N-term); Oxidation (M); ethanolamine (DE); ethanolamine (DE)	P63220	1896.9	15
1640	M(+42.01)(+15.99)QNDAGE(+43.04)FVD(+43.04)LYVP	-	-	MQNDAGEFVDLYVP	R	Acetylation (Protein N-term); Oxidation (M); ethanolamine (DE); ethanolamine (DE)	P63220	1740.8	14
1641	M(+42.01)(+15.99)QNDAGE(+43.04)FVD(+43.04)LYVPR	-	-	MQNDAGEFVDLYVPR	K	Acetylation (Protein N-term); Oxidation (M); ethanolamine (DE); ethanolamine (DE)	P63220	1896.9	15
1642	M(+42.01)(+15.99)QNVINTVKG	-	-	MQNVINTVKG	K	Acetylation (Protein N-term); Oxidation (M)	Q9NT62	1160.59	10
1643	M(+42.01)(+15.99)QPD(+43.04)PRPSGAGAC(+57.02)C(+57.02)	-	-	MQPDPRPSGAGACC	R	Acetylation (Protein N-term); Oxidation (M); ethanolamine (DE); Carbamidomethylation; Carbamidomethylation	Q14145	1603.65	14
1644	M(+42.01)(+15.99)QPPPPGPLGD(+43.04)C(+57.02)L	-	-	MQPPPPGPLGDCL	R	Acetylation (Protein N-term); Oxidation (M); ethanolamine (DE); Carbamidomethylation	Q9BXJ8	1478.69	13
1645	M(+42.01)(+15.99)QPPPQTVPSGM(+15.99)AGPPPAGNP	-	-	MQPPPQTVPSGMAGPPPAGNP	R	Acetylation (Protein N-term); Oxidation (M); Oxidation (M)	O15027	2100.96	21
1646	M(+42.01)(+15.99)QPPPQTVPSGMAGPPPAGNP	-	-	MQPPPQTVPSGMAGPPPAGNP	R	Acetylation (Protein N-term); Oxidation (M)	O15027	2084.97	21
1647	M(+42.01)(+15.99)QQPQPQGQQQPGPGQQLGGQGAAPGAGGGPGGGPGPGPC(+57.02)L	-	-	MQQPQPQGQQQPGPGQQLGGQGAAPGAGGGPGGGPGPGPCL	R	Acetylation (Protein N-term); Oxidation (M); Carbamidomethylation	Q7Z7E8	3815.75	41
1648	M(+42.01)(+15.99)QSPAVLVTSR	-	-	MQSPAVLVTSR	R	Acetylation (Protein N-term); Oxidation (M)	Q53T59	1245.64	11
1649	M(+42.01)(+15.99)QTPVNIPVPVL	-	-	MQTPVNIPVPVL	R	Acetylation (Protein N-term); Oxidation (M)	Q9H840	1364.74	12
1650	M(+42.01)(+15.99)QVSSLNE(+43.04)V	-	-	MQVSSLNEV	K	Acetylation (Protein N-term); Oxidation (M); ethanolamine (DE)	Q9BSC4	1106.53	9
1651	M(+42.01)(+15.99)SDNDDIEVESDE(+43.04)E(+43.04)QP(+43.04)	-	-	MSDNDDIEVESDEEQP	R	Acetylation (Protein N-term); Oxidation (M); ethanolamine (DE); ethanolamine (DE); ethanolamine (C-term)	P61244	2037.83	16
1652	M(+42.01)(+15.99)SPAAAAAGAGE(+43.04)	-，-	-，-	MSPAAAAAGAGE	R，R	Acetylation (Protein N-term); Oxidation (M); ethanolamine (DE)	Q96HA1，A8CG34	1103.49	12
1653	M(+42.01)(+15.99)TAAATATVL	-	-	MTAAATATVL	K	Acetylation (Protein N-term); Oxidation (M)	Q9Y5J5	1006.5	10
1654	M(+42.01)(+15.99)TAE(+43.04)PMSES(+43.04)	-	-	MTAEPMSES	K	Acetylation (Protein N-term); Oxidation (M); ethanolamine (DE); ethanolamine (C-term)	P46100	1125.47	9
1655	M(+42.01)(+15.99)TE(+43.04)AD(+43.04)VNP	-	-	MTEADVNP	K	Acetylation (Protein N-term); Oxidation (M); ethanolamine (DE); ethanolamine (DE)	P55769	1019.46	8
1656	M(+42.01)(+15.99)TE(+43.04)E(+43.04)SE(+43.04)E(+43.04)TVLYIE(+43.04)H	-	-	MTEESEETVLYIEH	R	Acetylation (Protein N-term); Oxidation (M); ethanolamine (DE); ethanolamine (DE); ethanolamine (DE); more	Q6ZN55	1981.97	14
1657	M(+42.01)(+15.99)TE(+43.04)E(+43.04)SE(+43.04)E(+43.04)TVLYIEH(+43.04)	-	-	MTEESEETVLYIEH	R	Acetylation (Protein N-term); Oxidation (M); ethanolamine (DE); ethanolamine (DE); ethanolamine (DE); more	Q6ZN55	1981.97	14
1658	M(+42.01)(+15.99)TSE(+43.04)VIE(+43.04)D(+43.04)E(+43.04)	-	-	MTSEVIEDE	K	Acetylation (Protein N-term); Oxidation (M); ethanolamine (DE); ethanolamine (DE); ethanolamine (DE); more	Q9BV86	1281.61	9
1659	M(+42.01)(+15.99)TSLAQQLQ	-	-	MTSLAQQLQ	R	Acetylation (Protein N-term); Oxidation (M)	Q9H583	1076.52	9
1660	M(+42.01)(+15.99)VAD(+43.04)PPR	-	-	MVADPPR	D	Acetylation (Protein N-term); Oxidation (M); ethanolamine (DE)	Q15758	885.438	7
1661	M(+42.01)(+15.99)VAD(+43.04)PPRDS(+43.04)	-	-	MVADPPRDS	K	Acetylation (Protein N-term); Oxidation (M); ethanolamine (DE); ethanolamine (C-term)	Q15758	1130.54	9
1662	M(+42.01)(+15.99)VD(+43.04)M(+15.99)MD(+43.04)LPR	-	-	MVDMMDLPR	S	Acetylation (Protein N-term); Oxidation (M); ethanolamine (DE); Oxidation (M); ethanolamine (DE)	P35244	1266.58	9
1663	M(+42.01)(+15.99)VD(+43.04)MMD(+43.04)LPR	-	-	MVDMMDLPR	S	Acetylation (Protein N-term); Oxidation (M); ethanolamine (DE); ethanolamine (DE)	P35244	1250.58	9
1664	M(+42.01)(+15.99)VD(+43.04)YHAANQ	-	-	MVDYHAANQ	S	Acetylation (Protein N-term); Oxidation (M); ethanolamine (DE)	O43707	1148.49	9
1665	M(+42.01)(+15.99)VE(+43.04)AD(+43.04)RPG	-，-，-	-，-，-	MVEADRPG	K，K，K	Acetylation (Protein N-term); Oxidation (M); ethanolamine (DE); ethanolamine (DE)	O75526，P38159，Q96E39	1017.49	8
1666	M(+42.01)(+15.99)VE(+43.04)D(+43.04)E(+43.04)LALFD(+43.04)	-	-	MVEDELALFD	K	Acetylation (Protein N-term); Oxidation (M); ethanolamine (DE); ethanolamine (DE); ethanolamine (DE); more	Q9HBM1	1410.71	10
1667	M(+42.01)(+15.99)VGQLSE(+43.04)GAIAAIMQ	-	-	MVGQLSEGAIAAIMQ	K	Acetylation (Protein N-term); Oxidation (M); ethanolamine (DE)	P27694	1618.81	15
1668	M(+42.01)(+15.99)VNPTVFF	-	-	MVNPTVFF	D	Acetylation (Protein N-term); Oxidation (M)	P62937	1011.47	8
1669	M(+42.01)(+15.99)VNPTVFFD(+43.04)	-	-	MVNPTVFFD	I	Acetylation (Protein N-term); Oxidation (M); ethanolamine (DE)	P62937	1169.54	9
1670	M(+42.01)(+15.99)VNPTVFFD(+43.04)I	-	-	MVNPTVFFDI	A	Acetylation (Protein N-term); Oxidation (M); ethanolamine (DE)	P62937	1282.63	10
1671	M(+42.01)(+15.99)VNPTVFFD(+43.04)IAVD(+43.04)	-	-	MVNPTVFFDIAVD	G	Acetylation (Protein N-term); Oxidation (M); ethanolamine (DE); ethanolamine (DE)	P62937	1610.8	13
1672	M(+42.01)(+15.99)VNPTVFFD(+43.04)IAVD(+43.04)GE(+43.04)PLG	-	-	MVNPTVFFDIAVDGEPLG	R	Acetylation (Protein N-term); Oxidation (M); ethanolamine (DE); ethanolamine (DE); ethanolamine (DE)	P62937	2107.07	18
1673	M(+42.01)(+15.99)VNPTVFFD(+43.04)IAVDGE(+43.04)PLG	-	-	MVNPTVFFDIAVDGEPLG	R	Acetylation (Protein N-term); Oxidation (M); ethanolamine (DE); ethanolamine (DE)	P62937	2064.02	18
1674	M(+42.01)(+15.99)VNPTVFFDIAVD(+43.04)GE(+43.04)PLG	-	-	MVNPTVFFDIAVDGEPLG	R	Acetylation (Protein N-term); Oxidation (M); ethanolamine (DE); ethanolamine (DE)	P62937	2064.02	18
1675	M(+42.01)(+15.99)VPSSPAVE(+43.04)	-	-	MVPSSPAVE	K	Acetylation (Protein N-term); Oxidation (M); ethanolamine (DE)	P41440	1016.48	9
1676	M(+42.01)(+15.99)VSHSE(+43.04)L	-	-	MVSHSEL	R	Acetylation (Protein N-term); Oxidation (M); ethanolamine (DE)	P78330	902.417	7
1677	M(+42.01)(+15.99)VSHSEL(+43.04)	-	-	MVSHSEL	R	Acetylation (Protein N-term); Oxidation (M); ethanolamine (C-term)	P78330	902.417	7
1678	M(+42.01)(+15.99)YHSLSET(+43.04)	-	-	MYHSLSET	R	Acetylation (Protein N-term); Oxidation (M); ethanolamine (C-term)	Q92609	1067.46	8
1679	M(+42.01)(+15.99)YSGAGPALAPPAPPPPIQGYAF	-	-	MYSGAGPALAPPAPPPPIQGYAF	K	Acetylation (Protein N-term); Oxidation (M)	Q9UKV8	2327.13	23
1680	M(+42.01)(+15.99)YTAIPQSGSPFPGSVQD(+43.04)PGLHVW	-	-	MYTAIPQSGSPFPGSVQDPGLHVW	R	Acetylation (Protein N-term); Oxidation (M); ethanolamine (DE)	P40121	2671.27	24
1681	M(+42.01)AAAAAGTATSQ	-	-	MAAAAAGTATSQ	R	Acetylation (Protein N-term)	Q9Y2Z0	1091.49	12
1682	M(+42.01)AEPSGAET	-	-	MAEPSGAET	R	Acetylation (Protein N-term)	Q9NRR5	933.375	9
1683	M(+42.01)APAE(+43.04)ILNG	-	-	MAPAEILNG	K	Acetylation (Protein N-term); ethanolamine (DE)	P11586	999.506	9
1684	M(+42.01)APD(+43.04)PVAAE(+43.04)TAAQGPTP	-	-	MAPDPVAAETAAQGPTP	R	Acetylation (Protein N-term); ethanolamine (DE); ethanolamine (DE)	O60427	1750.86	17
1685	M(+42.01)APD(+43.04)SD(+43.04)PFPE(+43.04)GPLL	-	-	MAPDSDPFPEGPLL	K	Acetylation (Protein N-term); ethanolamine (DE); ethanolamine (DE); ethanolamine (DE)	Q9BVQ7	1655.82	14
1686	M(+42.01)APE(+43.04)E(+43.04)D(+43.04)AGGE(+43.04)ALGGSFWE(+43.04)AGNY	-	-	MAPEEDAGGEALGGSFWEAGNY	R	Acetylation (Protein N-term); ethanolamine (DE); ethanolamine (DE); ethanolamine (DE); ethanolamine (DE); more	Q9UKS6	2514.15	22
1687	M(+42.01)APE(+43.04)E(+43.04)NAGTE(+43.04)LLLQSFE(+43.04)	-	-	MAPEENAGTELLLQSFE	R	Acetylation (Protein N-term); ethanolamine (DE); ethanolamine (DE); ethanolamine (DE); ethanolamine (DE)	Q96G04	2092.05	17
1688	M(+42.01)APE(+43.04)INLPGPM(+15.99)SLID(+43.04)NT	-	-	MAPEINLPGPMSLIDNT	K	Acetylation (Protein N-term); ethanolamine (DE); Oxidation (M); ethanolamine (DE)	P32456	1955.97	17
1689	M(+42.01)APE(+43.04)INLPGPMSLID(+43.04)NT	-	-	MAPEINLPGPMSLIDNT	K	Acetylation (Protein N-term); ethanolamine (DE); ethanolamine (DE)	P32456	1939.97	17
1690	M(+42.01)APGQLALF	-	-	MAPGQLALF	S	Acetylation (Protein N-term)	P31939	988.505	9
1691	M(+42.01)APGQLALFSVSD(+43.04)	-	-	MAPGQLALFSVSD	K	Acetylation (Protein N-term); ethanolamine (DE)	P31939	1419.71	13
1692	M(+42.01)APSVPAAE(+43.04)PE(+43.04)YP	-	-	MAPSVPAAEPEYP	K	Acetylation (Protein N-term); ethanolamine (DE); ethanolamine (DE)	P54819	1485.72	13
1693	M(+42.01)ARARAGALLALWVLGAAAHPQC(+57.02)LDFRPPF	-	-	MARARAGALLALWVLGAAAHPQCLDFRPPF	R	Acetylation (Protein N-term); Carbamidomethylation	Q96JK4	3317.74	30
1694	M(+42.01)ASPGKDNY	E，-	T，-	MASPGKDNY	R，R	Acetylation (Protein N-term)	O60684，O15131	1023.43	9
1695	M(+42.01)ATGGGAE(+43.04)E(+43.04)E(+43.04)	-	-	MATGGGAEEE	R	Acetylation (Protein N-term); ethanolamine (DE); ethanolamine (DE); ethanolamine (DE)	Q9NUD5	1121.5	10
1696	M(+42.01)ATY(+155.14)KVRVATGTDLLSGT	-	-	MATYKVRVATGTDLLSGT	R	Acetylation (Protein N-term); EDC(Y)	O75342	2080.14	18
1697	M(+42.01)D(+43.04)AD(+43.04)DSRAP	-	-	MDADDSRAP	K	Acetylation (Protein N-term); ethanolamine (DE); ethanolamine (DE)	Q01813	1104.49	9
1698	M(+42.01)D(+43.04)AGVTE(+43.04)SGL	-	-	MDAGVTESGL	N	Acetylation (Protein N-term); ethanolamine (DE); ethanolamine (DE)	Q15365	1106.53	10
1699	M(+42.01)D(+43.04)AGVTE(+43.04)SGLN	-	-	MDAGVTESGLN	V	Acetylation (Protein N-term); ethanolamine (DE); ethanolamine (DE)	Q15365	1220.57	11
1700	M(+42.01)D(+43.04)AGVTE(+43.04)SGLNVTLTI	-	-	MDAGVTESGLNVTLTI	R	Acetylation (Protein N-term); ethanolamine (DE); ethanolamine (DE)	Q15365	1747.9	16
1701	M(+42.01)D(+43.04)AILNY	-	-	MDAILNY	R	Acetylation (Protein N-term); ethanolamine (DE)	Q9UKB3	923.442	7
1702	M(+42.01)D(+43.04)ALC(+57.02)GSGE(+43.04)LGS	-	-	MDALCGSGELGS	K	Acetylation (Protein N-term); ethanolamine (DE); Carbamidomethylation; ethanolamine (DE)	O15438	1323.58	12
1703	M(+42.01)D(+43.04)ALE(+43.04)D(+43.04)YVWP	-	-	MDALEDYVWP	R	Acetylation (Protein N-term); ethanolamine (DE); ethanolamine (DE); ethanolamine (DE)	Q9NNW5	1408.67	10
1704	M(+42.01)D(+43.04)ALQLANSAF	-	-	MDALQLANSAF	A	Acetylation (Protein N-term); ethanolamine (DE)	P36952	1264.61	11
1705	M(+42.01)D(+43.04)ALQLANSAFAVD(+43.04)	-	-	MDALQLANSAFAVD	L	Acetylation (Protein N-term); ethanolamine (DE); ethanolamine (DE)	P36952	1592.79	14
1706	M(+42.01)D(+43.04)ALVE(+43.04)D(+43.04)D(+43.04)IC(+57.02)ILNHE(+43.04)	-	-	MDALVEDDICILNHE	K	Acetylation (Protein N-term); ethanolamine (DE); ethanolamine (DE); ethanolamine (DE); ethanolamine (DE); more	Q9H6S1	2043.01	15
1707	M(+42.01)D(+43.04)APGALAQTAAPGPG	-	-	MDAPGALAQTAAPGPG	R	Acetylation (Protein N-term); ethanolamine (DE)	Q9HBH0	1508.73	16
1708	M(+42.01)D(+43.04)APGALAQTAAPGPGR	-	-	MDAPGALAQTAAPGPGR	K	Acetylation (Protein N-term); ethanolamine (DE)	Q9HBH0	1664.83	17
1709	M(+42.01)D(+43.04)D(+43.04)KGDPSN	-	-	MDDKGDPSN	E	Acetylation (Protein N-term); ethanolamine (DE); ethanolamine (DE)	Q9BTC0	1105.47	9
1710	M(+42.01)D(+43.04)D(+43.04)QGC(+57.02)PR	-	-	MDDQGCPR	C	Acetylation (Protein N-term); ethanolamine (DE); ethanolamine (DE); Carbamidomethylation	P51948	1105.46	8
1711	M(+42.01)D(+43.04)D(+43.04)SE(+43.04)VE(+43.04)STASILASV	-	-	MDDSEVESTASILASV	K	Acetylation (Protein N-term); ethanolamine (DE); ethanolamine (DE); ethanolamine (DE); ethanolamine (DE)	O60716	1866.92	16
1712	M(+42.01)D(+43.04)D(+43.04)TLFQL	-	-	MDDTLFQL	K	Acetylation (Protein N-term); ethanolamine (DE); ethanolamine (DE)	Q9HD42	1109.54	8
1713	M(+42.01)D(+43.04)DRE(+43.04)D(+43.04)LVYQA	-	-	MDDREDLVYQA	K	Acetylation (Protein N-term); ethanolamine (DE); ethanolamine (DE); ethanolamine (DE)	P62258	1524.72	11
1714	M(+42.01)D(+43.04)DRE(+43.04)DLVYQA	-	-	MDDREDLVYQA	K	Acetylation (Protein N-term); ethanolamine (DE); ethanolamine (DE)	P62258	1481.68	11
1715	M(+42.01)D(+43.04)E(+43.04)AGSSASGGGF	-	-	MDEAGSSASGGGF	R	Acetylation (Protein N-term); ethanolamine (DE); ethanolamine (DE)	Q8IUH3	1299.54	13
1716	M(+42.01)D(+43.04)E(+43.04)AVGD(+43.04)L	-	-	MDEAVGDL	K	Acetylation (Protein N-term); ethanolamine (DE); ethanolamine (DE); ethanolamine (DE)	Q15645	1019.5	8
1717	M(+42.01)D(+43.04)E(+43.04)D(+43.04)VLTTL	-	-	MDEDVLTTL	K	Acetylation (Protein N-term); ethanolamine (DE); ethanolamine (DE); ethanolamine (DE)	Q9NP72	1206.62	9
1718	M(+42.01)D(+43.04)E(+43.04)LAGGGGGGPGMAAPP	-	-	MDELAGGGGGGPGMAAPP	R	Acetylation (Protein N-term); ethanolamine (DE); ethanolamine (DE)	Q13033	1668.76	18
1719	M(+42.01)D(+43.04)E(+43.04)LQD(+43.04)VQLTE(+43.04)I	-	-	MDELQDVQLTEI	K	Acetylation (Protein N-term); ethanolamine (DE); ethanolamine (DE); ethanolamine (DE); ethanolamine (DE)	Q9UGV2	1646.85	12
1720	M(+42.01)D(+43.04)E(+43.04)M(+15.99)ATTQIS	-	-	MDEMATTQIS	K	Acetylation (Protein N-term); ethanolamine (DE); ethanolamine (DE); Oxidation (M)	P13797	1269.56	10
1721	M(+42.01)D(+43.04)E(+43.04)MATTQIS	-	-	MDEMATTQIS	K	Acetylation (Protein N-term); ethanolamine (DE); ethanolamine (DE)	P13797	1253.56	10
1722	M(+42.01)D(+43.04)E(+43.04)PSPLAQPLE(+43.04)LNQHS	-	-	MDEPSPLAQPLELNQHS	R	Acetylation (Protein N-term); ethanolamine (DE); ethanolamine (DE); ethanolamine (DE)	Q13085	2076.03	17
1723	M(+42.01)D(+43.04)E(+43.04)QAGPGVFFSNNHPGAGGA	-	-	MDEQAGPGVFFSNNHPGAGGA	K	Acetylation (Protein N-term); ethanolamine (DE); ethanolamine (DE)	O43815	2186.98	21
1724	M(+42.01)D(+43.04)E(+43.04)QALLGLNPNAD(+43.04)SD(+43.04)F	-	-	MDEQALLGLNPNADSDF	R	Acetylation (Protein N-term); ethanolamine (DE); ethanolamine (DE); ethanolamine (DE); ethanolamine (DE)	O43592	2063	17
1725	M(+42.01)D(+43.04)E(+43.04)QALLGLNPNADSDF(+43.04)	-	-	MDEQALLGLNPNADSDF	R	Acetylation (Protein N-term); ethanolamine (DE); ethanolamine (DE); ethanolamine (C-term)	O43592	2019.96	17
1726	M(+42.01)D(+43.04)E(+43.04)QSQGM(+15.99)QGPPVPQFQPQ	-	-	MDEQSQGMQGPPVPQFQPQ	K	Acetylation (Protein N-term); ethanolamine (DE); ethanolamine (DE); Oxidation (M)	Q8TDX7	2272.03	19
1727	M(+42.01)D(+43.04)E(+43.04)QSQGMQGPPVPQFQPQ	-	-	MDEQSQGMQGPPVPQFQPQ	K	Acetylation (Protein N-term); ethanolamine (DE); ethanolamine (DE)	Q8TDX7	2256.03	19
1728	M(+42.01)D(+43.04)E(+43.04)TSPLVSPE(+43.04)	-	-	MDETSPLVSPE	R	Acetylation (Protein N-term); ethanolamine (DE); ethanolamine (DE); ethanolamine (DE)	Q9BTU6	1374.67	11
1729	M(+42.01)D(+43.04)FE(+43.04)D(+43.04)D(+43.04)YTHSAC(+57.02)	-	-	MDFEDDYTHSAC	R	Acetylation (Protein N-term); ethanolamine (DE); ethanolamine (DE); ethanolamine (DE); ethanolamine (DE); more	Q5BKZ1	1703.69	12
1730	M(+42.01)D(+43.04)FE(+43.04)DD(+43.04)YTHSAC(+57.02)	-	-	MDFEDDYTHSAC	R	Acetylation (Protein N-term); ethanolamine (DE); ethanolamine (DE); ethanolamine (DE); Carbamidomethylation	Q5BKZ1	1660.65	12
1731	M(+42.01)D(+43.04)FED(+43.04)D(+43.04)YTHSAC(+57.02)	-	-	MDFEDDYTHSAC	R	Acetylation (Protein N-term); ethanolamine (DE); ethanolamine (DE); ethanolamine (DE); Carbamidomethylation	Q5BKZ1	1660.65	12
1732	M(+42.01)D(+43.04)GAAGPGD(+43.04)GPA	-	-	MDGAAGPGDGPA	R	Acetylation (Protein N-term); ethanolamine (DE); ethanolamine (DE)	Q32P44	1142.5	12
1733	M(+42.01)D(+43.04)GASAE(+43.04)QD(+43.04)GLQE(+43.04)D(+43.04)	-	-	MDGASAEQDGLQED	R	Acetylation (Protein N-term); ethanolamine (DE); ethanolamine (DE); ethanolamine (DE); ethanolamine (DE); more	Q08378	1721.79	14
1734	M(+42.01)D(+43.04)GASAE(+43.04)QDGLQE(+43.04)D(+43.04)	-	-	MDGASAEQDGLQED	R	Acetylation (Protein N-term); ethanolamine (DE); ethanolamine (DE); ethanolamine (DE); ethanolamine (DE)	Q08378	1678.75	14
1735	M(+42.01)D(+43.04)GAVME(+43.04)GPLFLQSQ	-	-	MDGAVMEGPLFLQSQ	R	Acetylation (Protein N-term); ethanolamine (DE); ethanolamine (DE)	Q99704	1749.84	15
1736	M(+42.01)D(+43.04)GIVPD(+43.04)IAVGT	-	-	MDGIVPDIAVGT	K	Acetylation (Protein N-term); ethanolamine (DE); ethanolamine (DE)	P26599	1314.69	12
1737	M(+42.01)D(+43.04)GIVPD(+43.04)IAVGTK	-	-	MDGIVPDIAVGTK	R	Acetylation (Protein N-term); ethanolamine (DE); ethanolamine (DE)	P26599	1442.78	13
1738	M(+42.01)D(+43.04)GIVPDIAVGTK(+43.04)	-	-	MDGIVPDIAVGTK	R	Acetylation (Protein N-term); ethanolamine (DE); ethanolamine (C-term)	P26599	1442.78	13
1739	M(+42.01)D(+43.04)GPVAEHA(+43.04)	-	-	MDGPVAEHA	K	Acetylation (Protein N-term); ethanolamine (DE); ethanolamine (C-term)	Q96GA7	1053.49	9
1740	M(+42.01)D(+43.04)GSGPFSC(+57.02)PIC(+57.02)LE(+43.04)PL	-	-	MDGSGPFSCPICLEPL	R	Acetylation (Protein N-term); ethanolamine (DE); Carbamidomethylation; Carbamidomethylation; ethanolamine (DE)	Q96LD4	1906.86	16
1741	M(+42.01)D(+43.04)GTE(+43.04)GSAGQPGPAE(+43.04)	-	-	MDGTEGSAGQPGPAE	R	Acetylation (Protein N-term); ethanolamine (DE); ethanolamine (DE); ethanolamine (DE)	Q9BZ67	1573.7	15
1742	M(+42.01)D(+43.04)HYD(+43.04)SQQTN	-	-	MDHYDSQQTN	D	Acetylation (Protein N-term); ethanolamine (DE); ethanolamine (DE)	P12814	1365.56	10
1743	M(+42.01)D(+43.04)HYD(+43.04)SQQTND(+43.04)	-	-	MDHYDSQQTND	Y	Acetylation (Protein N-term); ethanolamine (DE); ethanolamine (DE); ethanolamine (DE)	P12814	1523.63	11
1744	M(+42.01)D(+43.04)HYD(+43.04)SQQTND(+43.04)Y	-	-	MDHYDSQQTNDY	M	Acetylation (Protein N-term); ethanolamine (DE); ethanolamine (DE); ethanolamine (DE)	P12814	1686.69	12
1745	M(+42.01)D(+43.04)HYD(+43.04)SQQTNDY(+43.04)	-	-	MDHYDSQQTNDY	M	Acetylation (Protein N-term); ethanolamine (DE); ethanolamine (DE); ethanolamine (C-term)	P12814	1686.69	12
1746	M(+42.01)D(+43.04)IAIHHPWI	-	-	MDIAIHHPWI	R	Acetylation (Protein N-term); ethanolamine (DE)	P02511	1316.67	10
1747	M(+42.01)D(+43.04)LAAAAE(+43.04)PGAGSQHLE(+43.04)V	-	-	MDLAAAAEPGAGSQHLEV	R	Acetylation (Protein N-term); ethanolamine (DE); ethanolamine (DE); ethanolamine (DE)	Q14566	1936.97	18
1748	M(+42.01)D(+43.04)LFGD(+43.04)LPE(+43.04)PE(+43.04)	-	-	MDLFGDLPEPE	R	Acetylation (Protein N-term); ethanolamine (DE); ethanolamine (DE); ethanolamine (DE); ethanolamine (DE)	Q9H0C8	1475.73	11
1749	M(+42.01)D(+43.04)LPALLPAPTA	-	-	MDLPALLPAPTA	R	Acetylation (Protein N-term); ethanolamine (DE)	Q2QGD7	1293.7	12
1750	M(+42.01)D(+43.04)LPVGPGAAGPSNVPAFLT	-	-	MDLPVGPGAAGPSNVPAFLT	K	Acetylation (Protein N-term); ethanolamine (DE)	Q00613	1995.01	20
1751	M(+42.01)D(+43.04)LQAAGAQAQGAAE(+43.04)PS	-	-	MDLQAAGAQAQGAAEPS	R	Acetylation (Protein N-term); ethanolamine (DE); ethanolamine (DE)	Q9NQ92	1742.83	17
1752	M(+42.01)D(+43.04)LVGVASPE(+43.04)PGTAAAWGPS	-	-	MDLVGVASPEPGTAAAWGPS	K	Acetylation (Protein N-term); ethanolamine (DE); ethanolamine (DE)	O14730	2040	20
1753	M(+42.01)D(+43.04)LYSTPAAALD(+43.04)	-	-	MDLYSTPAAALD	R	Acetylation (Protein N-term); ethanolamine (DE); ethanolamine (DE)	Q9Y6K5	1394.68	12
1754	M(+42.01)D(+43.04)M(+15.99)GNQHPSIS	-	-	MDMGNQHPSIS	R	Acetylation (Protein N-term); ethanolamine (DE); Oxidation (M)	Q9UL15	1316.55	11
1755	M(+42.01)D(+43.04)M(+15.99)LD(+43.04)PGLD(+43.04)PAASATAAAAASHD(+43.04)	-	-	MDMLDPGLDPAASATAAAAASHD	K	Acetylation (Protein N-term); ethanolamine (DE); Oxidation (M); ethanolamine (DE); ethanolamine (DE); more	Q15853	2428.14	23
1756	M(+42.01)D(+43.04)MGNQHPSIS	-	-	MDMGNQHPSIS	R	Acetylation (Protein N-term); ethanolamine (DE)	Q9UL15	1300.55	11
1757	M(+42.01)D(+43.04)NLSD(+43.04)TLK	-	-	MDNLSDTLK	K	Acetylation (Protein N-term); ethanolamine (DE); ethanolamine (DE)	P52306	1163.59	9
1758	M(+42.01)D(+43.04)NLSSE(+43.04)E(+43.04)IQQ	-	-	MDNLSSEEIQQ	R	Acetylation (Protein N-term); ethanolamine (DE); ethanolamine (DE); ethanolamine (DE)	O00161	1463.69	11
1759	M(+42.01)D(+43.04)NQC(+57.02)TVQV	-	-	MDNQCTVQV	R	Acetylation (Protein N-term); ethanolamine (DE); Carbamidomethylation	Q03111	1178.51	9
1760	M(+42.01)D(+43.04)NYAD(+43.04)LSD(+43.04)	-	-	MDNYADLSD	T	Acetylation (Protein N-term); ethanolamine (DE); ethanolamine (DE); ethanolamine (DE)	P50402	1213.53	9
1761	M(+42.01)D(+43.04)NYAD(+43.04)LSD(+43.04)TE(+43.04)LTTLL	-	-	MDNYADLSDTELTTLL	R	Acetylation (Protein N-term); ethanolamine (DE); ethanolamine (DE); ethanolamine (DE); ethanolamine (DE)	P50402	2028.01	16
1762	M(+42.01)D(+43.04)NYAD(+43.04)LSDTE(+43.04)LTTLL	-	-	MDNYADLSDTELTTLL	R	Acetylation (Protein N-term); ethanolamine (DE); ethanolamine (DE); ethanolamine (DE)	P50402	1984.97	16
1763	M(+42.01)D(+43.04)NYADLSD(+43.04)TE(+43.04)LTTLL	-	-	MDNYADLSDTELTTLL	R	Acetylation (Protein N-term); ethanolamine (DE); ethanolamine (DE); ethanolamine (DE)	P50402	1984.97	16
1764	M(+42.01)D(+43.04)PE(+43.04)C(+57.02)AQLLPALC(+57.02)	-	-	MDPECAQLLPALC	A	Acetylation (Protein N-term); ethanolamine (DE); ethanolamine (DE); Carbamidomethylation; Carbamidomethylation	Q6PJG6	1644.77	13
1765	M(+42.01)D(+43.04)PE(+43.04)D(+43.04)E(+43.04)GVAGVM(+15.99)SVGPPAA	-	-	MDPEDEGVAGVMSVGPPAA	R	Acetylation (Protein N-term); ethanolamine (DE); ethanolamine (DE); ethanolamine (DE); ethanolamine (DE); more	P17098	2057.98	19
1766	M(+42.01)D(+43.04)PLFQQTH	-	-	MDPLFQQTH	K	Acetylation (Protein N-term); ethanolamine (DE)	O14653	1200.56	9
1767	M(+42.01)D(+43.04)PLSPPLC(+57.02)TLPPGPE(+43.04)PP	-	-	MDPLSPPLCTLPPGPEPP	R	Acetylation (Protein N-term); ethanolamine (DE); Carbamidomethylation; ethanolamine (DE)	Q9BUH6	2042.02	18
1768	M(+42.01)D(+43.04)PNC(+57.02)SC(+57.02)AAGD(+43.04)	-	-	MDPNCSCAAGD	S	Acetylation (Protein N-term); ethanolamine (DE); Carbamidomethylation; Carbamidomethylation; ethanolamine (DE)	P02795	1324.48	11
1769	M(+42.01)D(+43.04)PNC(+57.02)SC(+57.02)AAGD(+43.04)SC(+57.02)TC(+57.02)AG	-	-	MDPNCSCAAGDSCTCAG	S	Acetylation (Protein N-term); ethanolamine (DE); Carbamidomethylation; Carbamidomethylation; ethanolamine (DE); more	P02795	1960.68	17
1770	M(+42.01)D(+43.04)PNC(+57.02)SC(+57.02)AAGD(+43.04)SC(+57.02)TC(+57.02)AGSC(+57.02)	-	-	MDPNCSCAAGDSCTCAGSC	K	Acetylation (Protein N-term); ethanolamine (DE); Carbamidomethylation; Carbamidomethylation; ethanolamine (DE); more	P02795	2207.75	19
1771	M(+42.01)D(+43.04)PNC(+57.02)SC(+57.02)AAGDSC(+57.02)TC(+57.02)AGSC(+57.02)	-	-	MDPNCSCAAGDSCTCAGSC	K	Acetylation (Protein N-term); ethanolamine (DE); Carbamidomethylation; Carbamidomethylation; Carbamidomethylation; more	P02795	2164.7	19
1772	M(+42.01)D(+43.04)PNC(+57.02)SC(+57.02)AAGVSC(+57.02)TC(+57.02)AGSC(+57.02)	-	-	MDPNCSCAAGVSCTCAGSC	K	Acetylation (Protein N-term); ethanolamine (DE); Carbamidomethylation; Carbamidomethylation; Carbamidomethylation; more	P04733	2148.75	19
1773	M(+42.01)D(+43.04)PNC(+57.02)SC(+57.02)ATGGSC(+57.02)TC(+57.02)AGSC(+57.02)	-	-	MDPNCSCATGGSCTCAGSC	K	Acetylation (Protein N-term); ethanolamine (DE); Carbamidomethylation; Carbamidomethylation; Carbamidomethylation; more	P04732	2136.71	19
1774	M(+42.01)D(+43.04)PNC(+57.02)SC(+57.02)E(+43.04)AGGSC(+57.02)AC(+57.02)AGSC(+57.02)	-	-	MDPNCSCEAGGSCACAGSC	K	Acetylation (Protein N-term); ethanolamine (DE); Carbamidomethylation; Carbamidomethylation; ethanolamine (DE); more	P80294	2177.74	19
1775	M(+42.01)D(+43.04)PNC(+57.02)SC(+57.02)SPVGSC(+57.02)AC(+57.02)AGSC(+57.02)	-	-	MDPNCSCSPVGSCACAGSC	K	Acetylation (Protein N-term); ethanolamine (DE); Carbamidomethylation; Carbamidomethylation; Carbamidomethylation; more	P80297	2160.75	19
1776	M(+42.01)D(+43.04)PNTIIE(+43.04)AL	-	-	MDPNTIIEAL	R	Acetylation (Protein N-term); ethanolamine (DE); ethanolamine (DE)	O95373	1243.65	10
1777	M(+42.01)D(+43.04)PSD(+43.04)FPSPFD(+43.04)PLTLPE(+43.04)	-	-	MDPSDFPSPFDPLTLPE	K	Acetylation (Protein N-term); ethanolamine (DE); ethanolamine (DE); ethanolamine (DE); ethanolamine (DE)	Q14202	2118.03	17
1778	M(+42.01)D(+43.04)PVPGTD(+43.04)SAPLAGL	-	-	MDPVPGTDSAPLAGL	A	Acetylation (Protein N-term); ethanolamine (DE); ethanolamine (DE)	Q96EY5	1567.79	15
1779	M(+42.01)D(+43.04)QC(+57.02)VTVE(+43.04)	-	-	MDQCVTVE	R	Acetylation (Protein N-term); ethanolamine (DE); Carbamidomethylation; ethanolamine (DE)	Q9H871	1108.49	8
1780	M(+42.01)D(+43.04)QE(+43.04)PVGGVE(+43.04)	-	-	MDQEPVGGVE	R	Acetylation (Protein N-term); ethanolamine (DE); ethanolamine (DE); ethanolamine (DE)	Q8N128	1230.59	10
1781	M(+42.01)D(+43.04)QVM(+15.99)QFVE(+43.04)PS	-	-	MDQVMQFVEPS	R	Acetylation (Protein N-term); ethanolamine (DE); Oxidation (M); ethanolamine (DE)	P60059	1453.66	11
1782	M(+42.01)D(+43.04)QVMQFVE(+43.04)PS	-	-	MDQVMQFVEPS	R	Acetylation (Protein N-term); ethanolamine (DE); ethanolamine (DE)	P60059	1437.66	11
1783	M(+42.01)D(+43.04)SAGQD(+43.04)INLN	-	-	MDSAGQDINLN	S	Acetylation (Protein N-term); ethanolamine (DE); ethanolamine (DE)	O43399	1304.6	11
1784	M(+42.01)D(+43.04)SAGQD(+43.04)INLNSPN	-	-	MDSAGQDINLNSPN	K	Acetylation (Protein N-term); ethanolamine (DE); ethanolamine (DE)	O43399	1602.73	14
1785	M(+42.01)D(+43.04)SE(+43.04)AFQSA	-	-	MDSEAFQSA	R	Acetylation (Protein N-term); ethanolamine (DE); ethanolamine (DE)	Q8WUF5	1112.48	9
1786	M(+42.01)D(+43.04)SKY(+155.14)QC(+57.02)V	-，-	-，-	MDSKYQCV	K，K	Acetylation (Protein N-term); ethanolamine (DE); EDC(Y); Carbamidomethylation	P52895，Q04828	1269.62	8
1787	M(+42.01)D(+43.04)SLE(+43.04)E(+43.04)PQ	-	-	MDSLEEPQ	K	Acetylation (Protein N-term); ethanolamine (DE); ethanolamine (DE); ethanolamine (DE)	Q6VMQ6	1118.53	8
1788	M(+42.01)D(+43.04)SPGYNC(+57.02)FVD(+43.04)	-	-	MDSPGYNCFVD	K	Acetylation (Protein N-term); ethanolamine (DE); Carbamidomethylation; ethanolamine (DE)	Q9ULP9	1431.58	11
1789	M(+42.01)D(+43.04)STLTASE(+43.04)I	-	-	MDSTLTASEI	R	Acetylation (Protein N-term); ethanolamine (DE); ethanolamine (DE)	P49588	1194.58	10
1790	M(+42.01)D(+43.04)TE(+43.04)GFGE(+43.04)LLQQAE(+43.04)QL	-	-	MDTEGFGELLQQAEQL	A	Acetylation (Protein N-term); ethanolamine (DE); ethanolamine (DE); ethanolamine (DE); ethanolamine (DE)	Q8N1F7	2022.01	16
1791	M(+42.01)D(+43.04)TE(+43.04)STYSGYSYYSSHS	-	-	MDTESTYSGYSYYSSHS	K	Acetylation (Protein N-term); ethanolamine (DE); ethanolamine (DE)	Q8TAA9	2091.84	17
1792	M(+42.01)D(+43.04)TGVIE(+43.04)GGLN	-	-	MDTGVIEGGLN	V	Acetylation (Protein N-term); ethanolamine (DE); ethanolamine (DE)	Q15366	1232.61	11
1793	M(+42.01)D(+43.04)VFLM(+15.99)IR	-	-	MDVFLMIR	R	Acetylation (Protein N-term); ethanolamine (DE); Oxidation (M)	Q15370	1124.57	8
1794	M(+42.01)D(+43.04)VGE(+43.04)LLSYQPN	-	-	MDVGELLSYQPN	R	Acetylation (Protein N-term); ethanolamine (DE); ethanolamine (DE)	Q8WYA6	1492.72	12
1795	M(+42.01)D(+43.04)VHD(+43.04)LF	-	-	MDVHDLF	R	Acetylation (Protein N-term); ethanolamine (DE); ethanolamine (DE)	Q9Y2R4	1003.48	7
1796	M(+42.01)D(+43.04)VLAE(+43.04)E(+43.04)FGNLTPE(+43.04)QLAAPIPTVEE(+43.04)(+43.04)	-	-	MDVLAEEFGNLTPEQLAAPIPTVEE	K	Acetylation (Protein N-term); ethanolamine (DE); ethanolamine (DE); ethanolamine (DE); ethanolamine (DE); more	Q9NW08	3012.58	25
1797	M(+42.01)D(+43.04)VLVSE(+43.04)C(+57.02)SA	-	-	MDVLVSECSA	R	Acetylation (Protein N-term); ethanolamine (DE); ethanolamine (DE); Carbamidomethylation	P54136	1237.57	10
1798	M(+42.01)D(+43.04)VNIAPL	-	-	MDVNIAPL	R	Acetylation (Protein N-term); ethanolamine (DE)	O75915	956.5	8
1799	M(+42.01)D(+43.04)VSGQE(+43.04)TD(+43.04)W	-	-	MDVSGQETDW	R	Acetylation (Protein N-term); ethanolamine (DE); ethanolamine (DE); ethanolamine (DE)	Q96RN5	1337.59	10
1800	M(+42.01)D(+43.04)VTSSSGGGGD(+43.04)P	-	-	MDVTSSSGGGGDP	R	Acetylation (Protein N-term); ethanolamine (DE); ethanolamine (DE)	Q8IY22	1293.55	13
1801	M(+42.01)DD(+43.04)RE(+43.04)D(+43.04)LVYQA	-	-	MDDREDLVYQA	K	Acetylation (Protein N-term); ethanolamine (DE); ethanolamine (DE); ethanolamine (DE)	P62258	1524.72	11
1802	M(+42.01)DFE(+43.04)D(+43.04)D(+43.04)YTHSAC(+57.02)	-	-	MDFEDDYTHSAC	R	Acetylation (Protein N-term); ethanolamine (DE); ethanolamine (DE); ethanolamine (DE); Carbamidomethylation	Q5BKZ1	1660.65	12
1803	M(+42.01)DGAAGPGDGPA(+43.04)	-	-	MDGAAGPGDGPA	R	Acetylation (Protein N-term); ethanolamine (C-term)	Q32P44	1099.46	12
1804	M(+42.01)DGASAE(+43.04)QD(+43.04)GLQE(+43.04)D(+43.04)	-	-	MDGASAEQDGLQED	R	Acetylation (Protein N-term); ethanolamine (DE); ethanolamine (DE); ethanolamine (DE); ethanolamine (DE)	Q08378	1678.75	14
1805	M(+42.01)DGIVPD(+43.04)IAVGTK	-	-	MDGIVPDIAVGTK	R	Acetylation (Protein N-term); ethanolamine (DE)	P26599	1399.74	13
1806	M(+42.01)DGSGPFSC(+57.02)PIC(+57.02)LE(+43.04)PL	-	-	MDGSGPFSCPICLEPL	R	Acetylation (Protein N-term); Carbamidomethylation; Carbamidomethylation; ethanolamine (DE)	Q96LD4	1863.82	16
1807	M(+42.01)DHYD(+43.04)SQQTND(+43.04)YMQPE(+43.04)E(+43.04)DWD(+43.04)(+43.04)	-	-	MDHYDSQQTNDYMQPEEDWD	R	Acetylation (Protein N-term); ethanolamine (DE); ethanolamine (DE); ethanolamine (DE); ethanolamine (DE); more	P12814	2846.19	20
1808	M(+42.01)DKNE(+43.04)LVQ	-	-	MDKNELVQ	K	Acetylation (Protein N-term); ethanolamine (DE)	P63104	1060.52	8
1809	M(+42.01)DLAAAAE(+43.04)PGAGSQHLE(+43.04)V	-	-	MDLAAAAEPGAGSQHLEV	R	Acetylation (Protein N-term); ethanolamine (DE); ethanolamine (DE)	Q14566	1893.93	18
1810	M(+42.01)DLAAAAE(+43.04)PGAGSQHLEV(+43.04)	-	-	MDLAAAAEPGAGSQHLEV	R	Acetylation (Protein N-term); ethanolamine (DE); ethanolamine (C-term)	Q14566	1893.93	18
1811	M(+42.01)DNLSSE(+43.04)E(+43.04)IQQ	-	-	MDNLSSEEIQQ	R	Acetylation (Protein N-term); ethanolamine (DE); ethanolamine (DE)	O00161	1420.65	11
1812	M(+42.01)DPNC(+57.02)SC(+57.02)ATGGSC(+57.02)TC(+57.02)AGSC(+57.02)	-	-	MDPNCSCATGGSCTCAGSC	K	Acetylation (Protein N-term); Carbamidomethylation; Carbamidomethylation; Carbamidomethylation; Carbamidomethylation; more	P04732	2093.67	19
1813	M(+42.01)DQVM(+15.99)QFVE(+43.04)PS	-	-	MDQVMQFVEPS	R	Acetylation (Protein N-term); Oxidation (M); ethanolamine (DE)	P60059	1410.62	11
1814	M(+42.01)DQVMQFVE(+43.04)PS	-	-	MDQVMQFVEPS	R	Acetylation (Protein N-term); ethanolamine (DE)	P60059	1394.62	11
1815	M(+42.01)DRPGPGSA	-	-	MDRPGPGSA	R	Acetylation (Protein N-term)	B2CW77	928.407	9
1816	M(+42.01)DSAGQD(+43.04)INLNSPN	-	-	MDSAGQDINLNSPN	K	Acetylation (Protein N-term); ethanolamine (DE)	O43399	1559.69	14
1817	M(+42.01)E(+43.04)AAAE(+43.04)PGNLAGV	-	-	MEAAAEPGNLAGV	R	Acetylation (Protein N-term); ethanolamine (DE); ethanolamine (DE)	Q9Y5Y2	1356.67	13
1818	M(+42.01)E(+43.04)AAE(+43.04)TE(+43.04)AE(+43.04)AAALE(+43.04)VL	-	-	MEAAETEAEAAALEVL	A	Acetylation (Protein N-term); ethanolamine (DE); ethanolamine (DE); ethanolamine (DE); ethanolamine (DE); more	O95229	1903.99	16
1819	M(+42.01)E(+43.04)AAGSPAATE(+43.04)TG	-	-	MEAAGSPAATETG	K	Acetylation (Protein N-term); ethanolamine (DE); ethanolamine (DE)	Q9BRP8	1319.6	13
1820	M(+42.01)E(+43.04)AAHFFE(+43.04)GTE(+43.04)	-	-	MEAAHFFEGTE	K	Acetylation (Protein N-term); ethanolamine (DE); ethanolamine (DE); ethanolamine (DE)	P17707	1438.65	11
1821	M(+42.01)E(+43.04)AAHLLPAAD(+43.04)VL	-	-	MEAAHLLPAADVL	R	Acetylation (Protein N-term); ethanolamine (DE); ethanolamine (DE)	Q93084	1477.8	13
1822	M(+42.01)E(+43.04)AAVGVPD(+43.04)GGD(+43.04)QGGAGP	-	-	MEAAVGVPDGGDQGGAGP	R	Acetylation (Protein N-term); ethanolamine (DE); ethanolamine (DE); ethanolamine (DE)	Q01804	1754.83	18
1823	M(+42.01)E(+43.04)AAVGVPD(+43.04)GGD(+43.04)QGGAGPR	-	-	MEAAVGVPDGGDQGGAGPR	E	Acetylation (Protein N-term); ethanolamine (DE); ethanolamine (DE); ethanolamine (DE)	Q01804	1910.93	19
1824	M(+42.01)E(+43.04)AE(+43.04)E(+43.04)SE(+43.04)	-	-	MEAEESE	K	Acetylation (Protein N-term); ethanolamine (DE); ethanolamine (DE); ethanolamine (DE); ethanolamine (DE)	Q9ULW3	1037.47	7
1825	M(+42.01)E(+43.04)AFQE(+43.04)L	-	-	MEAFQEL	R	Acetylation (Protein N-term); ethanolamine (DE); ethanolamine (DE)	Q96JM3	994.479	7
1826	M(+42.01)E(+43.04)ALGD(+43.04)LE(+43.04)GP	-	-	MEALGDLEGP	R	Acetylation (Protein N-term); ethanolamine (DE); ethanolamine (DE); ethanolamine (DE)	Q6NT16	1201.6	10
1827	M(+42.01)E(+43.04)ALGPGGD(+43.04)	-	-	MEALGPGGD	R	Acetylation (Protein N-term); ethanolamine (DE); ethanolamine (DE)	Q2M3G4	973.454	9
1828	M(+42.01)E(+43.04)ALILE(+43.04)PSLYTV	-	-	MEALILEPSLYTV	K	Acetylation (Protein N-term); ethanolamine (DE); ethanolamine (DE)	P61923	1605.87	13
1829	M(+42.01)E(+43.04)ALIPVIN	-	-	MEALIPVIN	K	Acetylation (Protein N-term); ethanolamine (DE)	O00429	1083.6	9
1830	M(+42.01)E(+43.04)ANGSQGTSGSAND(+43.04)SQHD(+43.04)PG	-	-	MEANGSQGTSGSANDSQHDPG	K	Acetylation (Protein N-term); ethanolamine (DE); ethanolamine (DE); ethanolamine (DE)	Q96DH6	2216.94	21
1831	M(+42.01)E(+43.04)APE(+43.04)E(+43.04)PAPV	-	-	MEAPEEPAPV	R	Acetylation (Protein N-term); ethanolamine (DE); ethanolamine (DE); ethanolamine (DE)	Q96FL8	1239.62	10
1832	M(+42.01)E(+43.04)APE(+43.04)GGGGGPAA	-	-	MEAPEGGGGGPAA	R	Acetylation (Protein N-term); ethanolamine (DE); ethanolamine (DE)	Q8N1B3	1227.56	13
1833	M(+42.01)E(+43.04)APGLAQAAAAE(+43.04)SD(+43.04)S	-	-	MEAPGLAQAAAAESDS	R	Acetylation (Protein N-term); ethanolamine (DE); ethanolamine (DE); ethanolamine (DE)	P51817	1688.8	16
1834	M(+42.01)E(+43.04)AQSHSSTTTE(+43.04)	-	-	MEAQSHSSTTTE	K	Acetylation (Protein N-term); ethanolamine (DE); ethanolamine (DE)	P10071	1435.62	12
1835	M(+42.01)E(+43.04)ASSE(+43.04)PPLD(+43.04)A	-	-	MEASSEPPLDA	K	Acetylation (Protein N-term); ethanolamine (DE); ethanolamine (DE); ethanolamine (DE)	Q7Z4G1	1316.63	11
1836	M(+42.01)E(+43.04)ATGVLPFV	-	-	MEATGVLPFV	R	Acetylation (Protein N-term); ethanolamine (DE)	Q13045	1147.59	10
1837	M(+42.01)E(+43.04)ATLE(+43.04)QHLE(+43.04)D(+43.04)	-	-	MEATLEQHLED	T	Acetylation (Protein N-term); ethanolamine (DE); ethanolamine (DE); ethanolamine (DE); ethanolamine (DE)	O43504	1528.76	11
1838	M(+42.01)E(+43.04)ATLE(+43.04)QHLE(+43.04)D(+43.04)T	-	-	MEATLEQHLEDT	M	Acetylation (Protein N-term); ethanolamine (DE); ethanolamine (DE); ethanolamine (DE); ethanolamine (DE)	O43504	1629.8	12
1839	M(+42.01)E(+43.04)ATLE(+43.04)QHLE(+43.04)D(+43.04)TM	-	-	MEATLEQHLEDTM	K	Acetylation (Protein N-term); ethanolamine (DE); ethanolamine (DE); ethanolamine (DE); ethanolamine (DE)	O43504	1760.84	13
1840	M(+42.01)E(+43.04)ATLE(+43.04)QHLE(+43.04)D(+43.04)TM(+15.99)	-	-	MEATLEQHLEDTM	K	Acetylation (Protein N-term); ethanolamine (DE); ethanolamine (DE); ethanolamine (DE); ethanolamine (DE); more	O43504	1776.84	13
1841	M(+42.01)E(+43.04)ATLE(+43.04)QHLE(+43.04)DT(+43.04)	-	-	MEATLEQHLEDT	M	Acetylation (Protein N-term); ethanolamine (DE); ethanolamine (DE); ethanolamine (DE); ethanolamine (C-term)	O43504	1629.8	12
1842	M(+42.01)E(+43.04)ATLE(+43.04)QHLE(+43.04)DTM	-	-	MEATLEQHLEDTM	K	Acetylation (Protein N-term); ethanolamine (DE); ethanolamine (DE); ethanolamine (DE)	O43504	1717.8	13
1843	M(+42.01)E(+43.04)ATLE(+43.04)QHLE(+43.04)DTM(+15.99)	-	-	MEATLEQHLEDTM	K	Acetylation (Protein N-term); ethanolamine (DE); ethanolamine (DE); ethanolamine (DE); Oxidation (M)	O43504	1733.8	13
1844	M(+42.01)E(+43.04)ATLE(+43.04)QHLE(+43.04)DTM(+43.04)	-	-	MEATLEQHLEDTM	K	Acetylation (Protein N-term); ethanolamine (DE); ethanolamine (DE); ethanolamine (DE); ethanolamine (C-term)	O43504	1760.84	13
1845	M(+42.01)E(+43.04)AVVNLYQE(+43.04)VM(+15.99)	-	-	MEAVVNLYQEVM	K	Acetylation (Protein N-term); ethanolamine (DE); ethanolamine (DE); Oxidation (M)	Q9BW60	1568.76	12
1846	M(+42.01)E(+43.04)C(+57.02)PHLSSSVC(+57.02)IAPD(+43.04)SA	-	-	MECPHLSSSVCIAPDSA	K	Acetylation (Protein N-term); ethanolamine (DE); Carbamidomethylation; Carbamidomethylation; ethanolamine (DE)	Q9Y6I4	1987.88	17
1847	M(+42.01)E(+43.04)C(+57.02)PSC(+57.02)QHVS	-	-	MECPSCQHVS	K	Acetylation (Protein N-term); ethanolamine (DE); Carbamidomethylation; Carbamidomethylation	Q63HN8	1318.51	10
1848	M(+42.01)E(+43.04)D(+43.04)D(+43.04)APVIYGLE(+43.04)FQA	-	-	MEDDAPVIYGLEFQA	R	Acetylation (Protein N-term); ethanolamine (DE); ethanolamine (DE); ethanolamine (DE); ethanolamine (DE)	Q53HC9	1910.94	15
1849	M(+42.01)E(+43.04)D(+43.04)GGLTAFE(+43.04)E(+43.04)D(+43.04)Q	-	-	MEDGGLTAFEEDQ	R	Acetylation (Protein N-term); ethanolamine (DE); ethanolamine (DE); ethanolamine (DE); ethanolamine (DE); more	Q96RG2	1697.79	13
1850	M(+42.01)E(+43.04)D(+43.04)LD(+43.04)QSPLVSSSD(+43.04)	-	-	MEDLDQSPLVSSSD	S	Acetylation (Protein N-term); ethanolamine (DE); ethanolamine (DE); ethanolamine (DE); ethanolamine (DE)	Q9NQC3	1735.83	14
1851	M(+42.01)E(+43.04)D(+43.04)LD(+43.04)QSPLVSSSD(+43.04)SPPRPQPAF	-	-	MEDLDQSPLVSSSDSPPRPQPAF	K	Acetylation (Protein N-term); ethanolamine (DE); ethanolamine (DE); ethanolamine (DE); ethanolamine (DE)	Q9NQC3	2713.34	23
1852	M(+42.01)E(+43.04)D(+43.04)LGE(+43.04)NTM(+15.99)VLSTL	-	-	MEDLGENTMVLSTL	R	Acetylation (Protein N-term); ethanolamine (DE); ethanolamine (DE); ethanolamine (DE); Oxidation (M)	Q9Y6D9	1738.85	14
1853	M(+42.01)E(+43.04)D(+43.04)LGE(+43.04)NTMVLSTL	-	-	MEDLGENTMVLSTL	R	Acetylation (Protein N-term); ethanolamine (DE); ethanolamine (DE); ethanolamine (DE)	Q9Y6D9	1722.85	14
1854	M(+42.01)E(+43.04)D(+43.04)LVQD(+43.04)GVASPATPGTG	-	-	MEDLVQDGVASPATPGTG	K	Acetylation (Protein N-term); ethanolamine (DE); ethanolamine (DE); ethanolamine (DE)	Q8IWJ2	1914.94	18
1855	M(+42.01)E(+43.04)D(+43.04)PTLYIVE(+43.04)	-	-	MEDPTLYIVE	R	Acetylation (Protein N-term); ethanolamine (DE); ethanolamine (DE); ethanolamine (DE)	Q6NZI2	1379.7	10
1856	M(+42.01)E(+43.04)D(+43.04)SASASLSSAAATGTSTSTPAAPTA	-	-	MEDSASASLSSAAATGTSTSTPAAPTA	R	Acetylation (Protein N-term); ethanolamine (DE); ethanolamine (DE)	O76021	2568.19	27
1857	M(+42.01)E(+43.04)D(+43.04)SE(+43.04)ALGFE(+43.04)HMGLD(+43.04)P	-	-	MEDSEALGFEHMGLDP	R	Acetylation (Protein N-term); ethanolamine (DE); ethanolamine (DE); ethanolamine (DE); ethanolamine (DE); more	Q9NY93	2033.95	16
1858	M(+42.01)E(+43.04)D(+43.04)SM(+15.99)D(+43.04)M(+15.99)DMSPL	-	-	MEDSMDMDMSPL	R	Acetylation (Protein N-term); ethanolamine (DE); ethanolamine (DE); Oxidation (M); ethanolamine (DE); more	P06748	1603.62	12
1859	M(+42.01)E(+43.04)D(+43.04)SM(+15.99)D(+43.04)MD(+43.04)	-	-	MEDSMDMD	M	Acetylation (Protein N-term); ethanolamine (DE); ethanolamine (DE); Oxidation (M); ethanolamine (DE); more	P06748	1202.46	8
1860	M(+42.01)E(+43.04)D(+43.04)SM(+15.99)D(+43.04)MD(+43.04)MSPL	-	-	MEDSMDMDMSPL	R	Acetylation (Protein N-term); ethanolamine (DE); ethanolamine (DE); Oxidation (M); ethanolamine (DE); more	P06748	1630.67	12
1861	M(+42.01)E(+43.04)D(+43.04)SM(+15.99)D(+43.04)MDM(+15.99)SPL	-	-	MEDSMDMDMSPL	R	Acetylation (Protein N-term); ethanolamine (DE); ethanolamine (DE); Oxidation (M); ethanolamine (DE); more	P06748	1603.62	12
1862	M(+42.01)E(+43.04)D(+43.04)SM(+15.99)DMD(+43.04)M(+15.99)SPL	-	-	MEDSMDMDMSPL	R	Acetylation (Protein N-term); ethanolamine (DE); ethanolamine (DE); Oxidation (M); ethanolamine (DE); more	P06748	1603.62	12
1863	M(+42.01)E(+43.04)D(+43.04)SMD(+43.04)M(+15.99)D(+43.04)	-	-	MEDSMDMD	M	Acetylation (Protein N-term); ethanolamine (DE); ethanolamine (DE); ethanolamine (DE); Oxidation (M); more	P06748	1202.46	8
1864	M(+42.01)E(+43.04)D(+43.04)SMD(+43.04)M(+15.99)D(+43.04)MSPL	-	-	MEDSMDMDMSPL	R	Acetylation (Protein N-term); ethanolamine (DE); ethanolamine (DE); ethanolamine (DE); Oxidation (M); more	P06748	1630.67	12
1865	M(+42.01)E(+43.04)D(+43.04)SMD(+43.04)MD(+43.04)	-	-	MEDSMDMD	M	Acetylation (Protein N-term); ethanolamine (DE); ethanolamine (DE); ethanolamine (DE); ethanolamine (DE)	P06748	1186.47	8
1866	M(+42.01)E(+43.04)D(+43.04)SMD(+43.04)MD(+43.04)M(+15.99)SPL	-	-	MEDSMDMDMSPL	R	Acetylation (Protein N-term); ethanolamine (DE); ethanolamine (DE); ethanolamine (DE); ethanolamine (DE); more	P06748	1630.67	12
1867	M(+42.01)E(+43.04)D(+43.04)SMD(+43.04)MD(+43.04)MSPL	-	-	MEDSMDMDMSPL	R	Acetylation (Protein N-term); ethanolamine (DE); ethanolamine (DE); ethanolamine (DE); ethanolamine (DE)	P06748	1614.68	12
1868	M(+42.01)E(+43.04)D(+43.04)SMD(+43.04)MDM(+15.99)SPL	-	-	MEDSMDMDMSPL	R	Acetylation (Protein N-term); ethanolamine (DE); ethanolamine (DE); ethanolamine (DE); Oxidation (M)	P06748	1587.63	12
1869	M(+42.01)E(+43.04)D(+43.04)SMD(+43.04)MDMSPL	-	-	MEDSMDMDMSPL	R	Acetylation (Protein N-term); ethanolamine (DE); ethanolamine (DE); ethanolamine (DE)	P06748	1571.63	12
1870	M(+42.01)E(+43.04)D(+43.04)SMD(+43.04)MDMSPL(+43.04)	-	-	MEDSMDMDMSPL	R	Acetylation (Protein N-term); ethanolamine (DE); ethanolamine (DE); ethanolamine (DE); ethanolamine (C-term)	P06748	1614.68	12
1871	M(+42.01)E(+43.04)D(+43.04)SMDM(+15.99)D(+43.04)M(+15.99)SPL	-	-	MEDSMDMDMSPL	R	Acetylation (Protein N-term); ethanolamine (DE); ethanolamine (DE); Oxidation (M); ethanolamine (DE); more	P06748	1603.62	12
1872	M(+42.01)E(+43.04)D(+43.04)SMDMD(+43.04)MSPL	-	-	MEDSMDMDMSPL	R	Acetylation (Protein N-term); ethanolamine (DE); ethanolamine (DE); ethanolamine (DE)	P06748	1571.63	12
1873	M(+42.01)E(+43.04)D(+43.04)SQD(+43.04)LNE(+43.04)QSV	-	-	MEDSQDLNEQSV	K	Acetylation (Protein N-term); ethanolamine (DE); ethanolamine (DE); ethanolamine (DE); ethanolamine (DE)	O95677	1607.75	12
1874	M(+42.01)E(+43.04)D(+43.04)SQD(+43.04)LNE(+43.04)QSVK	-	-	MEDSQDLNEQSVK	K	Acetylation (Protein N-term); ethanolamine (DE); ethanolamine (DE); ethanolamine (DE); ethanolamine (DE)	O95677	1735.84	13
1875	M(+42.01)E(+43.04)D(+43.04)VNSNVNAD(+43.04)QEV(+43.04)	-	-	MEDVNSNVNADQEV	R	Acetylation (Protein N-term); ethanolamine (DE); ethanolamine (DE); ethanolamine (DE); ethanolamine (C-term)	Q9P270	1776.83	14
1876	M(+42.01)E(+43.04)D(+43.04)YLQGC(+57.02)	-	-	MEDYLQGC	R	Acetylation (Protein N-term); ethanolamine (DE); ethanolamine (DE); Carbamidomethylation	Q86TP1	1142.47	8
1877	M(+42.01)E(+43.04)DSM(+15.99)D(+43.04)M(+15.99)D(+43.04)MSPL	-	-	MEDSMDMDMSPL	R	Acetylation (Protein N-term); ethanolamine (DE); Oxidation (M); ethanolamine (DE); Oxidation (M); more	P06748	1603.62	12
1878	M(+42.01)E(+43.04)DSMD(+43.04)MDMSPL	-	-	MEDSMDMDMSPL	R	Acetylation (Protein N-term); ethanolamine (DE); ethanolamine (DE)	P06748	1528.59	12
1879	M(+42.01)E(+43.04)E(+43.04)D(+43.04)QE(+43.04)LE(+43.04)	-，-	-，-	MEEDQELE	R，R	Acetylation (Protein N-term); ethanolamine (DE); ethanolamine (DE); ethanolamine (DE); ethanolamine (DE); more	P0DPB6，P0DPB5	1278.61	8
1880	M(+42.01)E(+43.04)E(+43.04)E(+43.04)ASSPGLGC(+57.02)S	-	-	MEEEASSPGLGCS	K	Acetylation (Protein N-term); ethanolamine (DE); ethanolamine (DE); ethanolamine (DE); Carbamidomethylation	Q68CL5	1523.66	13
1881	M(+42.01)E(+43.04)E(+43.04)E(+43.04)GLE(+43.04)C(+57.02)PNSSSE(+43.04)	-	-	MEEEGLECPNSSSE	K	Acetylation (Protein N-term); ethanolamine (DE); ethanolamine (DE); ethanolamine (DE); ethanolamine (DE); more	Q7L7V1	1853.81	14
1882	M(+42.01)E(+43.04)E(+43.04)E(+43.04)IAALVID(+43.04)	-	-	MEEEIAALVID	N	Acetylation (Protein N-term); ethanolamine (DE); ethanolamine (DE); ethanolamine (DE); ethanolamine (DE)	P63261	1445.78	11
1883	M(+42.01)E(+43.04)E(+43.04)E(+43.04)LQHSHC(+57.02)VNC(+57.02)VS	-	-	MEEELQHSHCVNCVS	R	Acetylation (Protein N-term); ethanolamine (DE); ethanolamine (DE); ethanolamine (DE); Carbamidomethylation; more	Q8TB52	2028.88	15
1884	M(+42.01)E(+43.04)E(+43.04)E(+43.04)QD(+43.04)LPE(+43.04)QPV	-	-	MEEEQDLPEQPV	K	Acetylation (Protein N-term); ethanolamine (DE); ethanolamine (DE); ethanolamine (DE); ethanolamine (DE); more	Q99504	1699.85	12
1885	M(+42.01)E(+43.04)E(+43.04)E(+43.04)QD(+43.04)LPE(+43.04)QPVK	-	-	MEEEQDLPEQPVK	K	Acetylation (Protein N-term); ethanolamine (DE); ethanolamine (DE); ethanolamine (DE); ethanolamine (DE); more	Q99504	1827.94	13
1886	M(+42.01)E(+43.04)E(+43.04)GGRDKAPVQPQQSPAAAPGGTDE(+43.04)(+43.04)	-	-	MEEGGRDKAPVQPQQSPAAAPGGTDE	K	Acetylation (Protein N-term); ethanolamine (DE); ethanolamine (DE); ethanolamine (C-term); ethanolamine (DE)	Q13200	2836.38	26
1887	M(+42.01)E(+43.04)E(+43.04)GHGLD(+43.04)LTYITE(+43.04)	-	-	MEEGHGLDLTYITE	R	Acetylation (Protein N-term); ethanolamine (DE); ethanolamine (DE); ethanolamine (DE); ethanolamine (DE)	Q68CZ2	1820.9	14
1888	M(+42.01)E(+43.04)E(+43.04)HSYIQ	-	-	MEEHSYIQ	K	Acetylation (Protein N-term); ethanolamine (DE); ethanolamine (DE)	Q86SQ0	1163.53	8
1889	M(+42.01)E(+43.04)E(+43.04)LD(+43.04)GE(+43.04)PTVTLIPGVNS	-	-	MEELDGEPTVTLIPGVNS	K	Acetylation (Protein N-term); ethanolamine (DE); ethanolamine (DE); ethanolamine (DE); ethanolamine (DE)	Q9BW27	2114.09	18
1890	M(+42.01)E(+43.04)E(+43.04)LDGE(+43.04)PTVTLIPGVNS	-	-	MEELDGEPTVTLIPGVNS	K	Acetylation (Protein N-term); ethanolamine (DE); ethanolamine (DE); ethanolamine (DE)	Q9BW27	2071.05	18
1891	M(+42.01)E(+43.04)E(+43.04)LIVE(+43.04)L	-	-	MEELIVEL	R	Acetylation (Protein N-term); ethanolamine (DE); ethanolamine (DE); ethanolamine (DE)	Q8N556	1145.64	8
1892	M(+42.01)E(+43.04)E(+43.04)LSAD(+43.04)E(+43.04)I	-	-	MEELSADEI	R	Acetylation (Protein N-term); ethanolamine (DE); ethanolamine (DE); ethanolamine (DE); ethanolamine (DE)	O95155	1249.62	9
1893	M(+42.01)E(+43.04)E(+43.04)LSAD(+43.04)E(+43.04)IR	-	-	MEELSADEIR	R	Acetylation (Protein N-term); ethanolamine (DE); ethanolamine (DE); ethanolamine (DE); ethanolamine (DE)	O95155	1405.72	10
1894	M(+42.01)E(+43.04)E(+43.04)LVVE(+43.04)V	-	-	MEELVVEV	R	Acetylation (Protein N-term); ethanolamine (DE); ethanolamine (DE); ethanolamine (DE)	Q06787	1117.61	8
1895	M(+42.01)E(+43.04)E(+43.04)PQAGD(+43.04)AA	-	-	MEEPQAGDAA	R	Acetylation (Protein N-term); ethanolamine (DE); ethanolamine (DE); ethanolamine (DE)	O15446	1188.54	10
1896	M(+42.01)E(+43.04)E(+43.04)SGYE(+43.04)SVLC(+57.02)V	-	-	MEESGYESVLCV	K	Acetylation (Protein N-term); ethanolamine (DE); ethanolamine (DE); ethanolamine (DE); Carbamidomethylation	Q9NVZ3	1572.72	12
1897	M(+42.01)E(+43.04)E(+43.04)SVNQM(+15.99)QPLNE(+43.04)	-	-	MEESVNQMQPLNE	K	Acetylation (Protein N-term); ethanolamine (DE); ethanolamine (DE); Oxidation (M); ethanolamine (DE)	P10155	1734.79	13
1898	M(+42.01)E(+43.04)E(+43.04)SVNQMQPLNE(+43.04)	-	-	MEESVNQMQPLNE	K	Acetylation (Protein N-term); ethanolamine (DE); ethanolamine (DE); ethanolamine (DE)	P10155	1718.8	13
1899	M(+42.01)E(+43.04)E(+43.04)VPHD(+43.04)C(+57.02)PGAD(+43.04)	-	-	MEEVPHDCPGAD	S	Acetylation (Protein N-term); ethanolamine (DE); ethanolamine (DE); ethanolamine (DE); Carbamidomethylation; more	P53384	1569.69	12
1900	M(+42.01)E(+43.04)E(+43.04)VPHD(+43.04)C(+57.02)PGAD(+43.04)SAQAG	-	-	MEEVPHDCPGADSAQAG	R	Acetylation (Protein N-term); ethanolamine (DE); ethanolamine (DE); ethanolamine (DE); Carbamidomethylation; more	P53384	1983.88	17
1901	M(+42.01)E(+43.04)E(+43.04)VPHD(+43.04)C(+57.02)PGADSAQAG	-	-	MEEVPHDCPGADSAQAG	R	Acetylation (Protein N-term); ethanolamine (DE); ethanolamine (DE); ethanolamine (DE); Carbamidomethylation	P53384	1940.84	17
1902	M(+42.01)E(+43.04)E(+43.04)VPHD(+43.04)C(+57.02)PGADSAQAG(+43.04)	-	-	MEEVPHDCPGADSAQAG	R	Acetylation (Protein N-term); ethanolamine (DE); ethanolamine (DE); ethanolamine (DE); Carbamidomethylation; more	P53384	1983.88	17
1903	M(+42.01)E(+43.04)E(+43.04)VVIAGM(+15.99)SG	-	-	MEEVVIAGMSG	K	Acetylation (Protein N-term); ethanolamine (DE); ethanolamine (DE); Oxidation (M)	P49327	1265.6	11
1904	M(+42.01)E(+43.04)E(+43.04)VVIAGMSG	-	-	MEEVVIAGMSG	K	Acetylation (Protein N-term); ethanolamine (DE); ethanolamine (DE)	P49327	1249.6	11
1905	M(+42.01)E(+43.04)FAAE(+43.04)NE(+43.04)G	-	-	MEFAAENEG	K	Acetylation (Protein N-term); ethanolamine (DE); ethanolamine (DE); ethanolamine (DE)	Q9NWK9	1167.52	9
1906	M(+42.01)E(+43.04)FD(+43.04)LGAALE(+43.04)PTSQ	-	-	MEFDLGAALEPTSQ	K	Acetylation (Protein N-term); ethanolamine (DE); ethanolamine (DE); ethanolamine (DE)	Q9GZP8	1678.82	14
1907	M(+42.01)E(+43.04)FDLGAALE(+43.04)PTSQ	-	-	MEFDLGAALEPTSQ	K	Acetylation (Protein N-term); ethanolamine (DE); ethanolamine (DE)	Q9GZP8	1635.78	14
1908	M(+42.01)E(+43.04)FPD(+43.04)LGAHC(+57.02)SE(+43.04)PSC(+57.02)Q	-	-	MEFPDLGAHCSEPSCQ	R	Acetylation (Protein N-term); ethanolamine (DE); ethanolamine (DE); Carbamidomethylation; ethanolamine (DE); more	Q8WV99	2034.86	16
1909	M(+42.01)E(+43.04)FQAVVM(+15.99)AVGGGS	-	-	MEFQAVVMAVGGGS	R	Acetylation (Protein N-term); ethanolamine (DE); Oxidation (M)	Q9NR50	1482.68	14
1910	M(+42.01)E(+43.04)GAGE(+43.04)NAPE(+43.04)SSSSAPGSE(+43.04)E(+43.04)SA	-	-	MEGAGENAPESSSSAPGSEESA	R	Acetylation (Protein N-term); ethanolamine (DE); ethanolamine (DE); ethanolamine (DE); ethanolamine (DE); more	Q9BYX2	2337.04	22
1911	M(+42.01)E(+43.04)GC(+57.02)VSNL	-	-	MEGCVSNL	M	Acetylation (Protein N-term); ethanolamine (DE); Carbamidomethylation	O75832	993.426	8
1912	M(+42.01)E(+43.04)GC(+57.02)VSNLMVC(+57.02)NL	-	-	MEGCVSNLMVCNL	A	Acetylation (Protein N-term); ethanolamine (DE); Carbamidomethylation; Carbamidomethylation	O75832	1610.69	13
1913	M(+42.01)E(+43.04)GGFGSD(+43.04)FGGSGSG	-	-	MEGGFGSDFGGSGSG	K	Acetylation (Protein N-term); ethanolamine (DE); ethanolamine (DE)	Q9Y5L4	1475.6	15
1914	M(+42.01)E(+43.04)GGGGIPLE(+43.04)TL	-	-	MEGGGGIPLETL	K	Acetylation (Protein N-term); ethanolamine (DE); ethanolamine (DE)	Q6P4H8	1300.67	12
1915	M(+42.01)E(+43.04)GGLAD(+43.04)GE(+43.04)PD(+43.04)	-	-	MEGGLADGEPD	R	Acetylation (Protein N-term); ethanolamine (DE); ethanolamine (DE); ethanolamine (DE); ethanolamine (DE)	Q9BZF1	1303.61	11
1916	M(+42.01)E(+43.04)GGPAVC(+57.02)C(+57.02)QD(+43.04)P	-	-	MEGGPAVCCQDP	R	Acetylation (Protein N-term); ethanolamine (DE); Carbamidomethylation; Carbamidomethylation; ethanolamine (DE)	Q8N5S9	1447.59	12
1917	M(+42.01)E(+43.04)GISNF	-	-	MEGISNF	K	Acetylation (Protein N-term); ethanolamine (DE)	Q96KB5	881.395	7
1918	M(+42.01)E(+43.04)GLTLSD(+43.04)AE(+43.04)Q	-	-	MEGLTLSDAEQ	K	Acetylation (Protein N-term); ethanolamine (DE); ethanolamine (DE); ethanolamine (DE)	Q96D71	1363.67	11
1919	M(+42.01)E(+43.04)GPAE(+43.04)WGPE(+43.04)AALGPE(+43.04)AVL	-	-	MEGPAEWGPEAALGPEAVL	R	Acetylation (Protein N-term); ethanolamine (DE); ethanolamine (DE); ethanolamine (DE); ethanolamine (DE)	Q53LP3	2137.09	19
1920	M(+42.01)E(+43.04)GPGLGSQC(+57.02)	-	-	MEGPGLGSQC	R	Acetylation (Protein N-term); ethanolamine (DE); Carbamidomethylation	Q8IUH4	1119.47	10
1921	M(+42.01)E(+43.04)GPLSVFGD(+43.04)	-	-	MEGPLSVFGD	R	Acetylation (Protein N-term); ethanolamine (DE); ethanolamine (DE)	P17987	1178.56	10
1922	M(+42.01)E(+43.04)GQSVE(+43.04)E(+43.04)LLA	-	-	MEGQSVEELLA	K	Acetylation (Protein N-term); ethanolamine (DE); ethanolamine (DE); ethanolamine (DE)	Q15050	1375.7	11
1923	M(+42.01)E(+43.04)GSASPPE(+43.04)KP	-	-	MEGSASPPEKP	R	Acetylation (Protein N-term); ethanolamine (DE); ethanolamine (DE)	Q96NT5	1256.61	11
1924	M(+42.01)E(+43.04)GSE(+43.04)PVAAHQGE(+43.04)E(+43.04)ASC(+57.02)SSWGTGSTN	-	-	MEGSEPVAAHQGEEASCSSWGTGSTN	K	Acetylation (Protein N-term); ethanolamine (DE); ethanolamine (DE); ethanolamine (DE); ethanolamine (DE); more	A0AVT1	2879.25	26
1925	M(+42.01)E(+43.04)GSGE(+43.04)QPGPQPQHPGD(+43.04)H	-	-	MEGSGEQPGPQPQHPGDH	R	Acetylation (Protein N-term); ethanolamine (DE); ethanolamine (DE); ethanolamine (DE)	Q9UJA5	2054.92	18
1926	M(+42.01)E(+43.04)GSGE(+43.04)QPGPQPQHPGDH(+43.04)	-	-	MEGSGEQPGPQPQHPGDH	R	Acetylation (Protein N-term); ethanolamine (DE); ethanolamine (DE); ethanolamine (C-term)	Q9UJA5	2054.92	18
1927	M(+42.01)E(+43.04)GVE(+43.04)EKK	-	-	MEGVEEKK	K	Acetylation (Protein N-term); ethanolamine (DE); ethanolamine (DE)	P18124	1076.55	8
1928	M(+42.01)E(+43.04)GVSALLA	-	-	MEGVSALLA	R	Acetylation (Protein N-term); ethanolamine (DE)	Q5SNT2	974.511	9
1929	M(+42.01)E(+43.04)HIQGAW	-	-	MEHIQGAW	K	Acetylation (Protein N-term); ethanolamine (DE)	P04049	1055.49	8
1930	M(+42.01)E(+43.04)HVTE(+43.04)GSWE(+43.04)SLPVPLHPQVLGAL	-	-	MEHVTEGSWESLPVPLHPQVLGAL	R	Acetylation (Protein N-term); ethanolamine (DE); ethanolamine (DE); ethanolamine (DE)	Q8NHQ9	2796.46	24
1931	M(+42.01)E(+43.04)IGSAGPAGAQPLLMVP	-	-	MEIGSAGPAGAQPLLMVP	R	Acetylation (Protein N-term); ethanolamine (DE)	Q9H9G7	1822.93	18
1932	M(+42.01)E(+43.04)IGTE(+43.04)ISR	-	-	MEIGTEISR	K	Acetylation (Protein N-term); ethanolamine (DE); ethanolamine (DE)	Q6PJT7	1162.6	9
1933	M(+42.01)E(+43.04)IPPTNYPAS	-	-	MEIPPTNYPAS	R	Acetylation (Protein N-term); ethanolamine (DE)	Q9BS40	1303.61	11
1934	M(+42.01)E(+43.04)LE(+43.04)D(+43.04)GVVYQE(+43.04)EPGGSGAVMSE(+43.04)(+43.04)	-	-	MELEDGVVYQEEPGGSGAVMSE	R	Acetylation (Protein N-term); ethanolamine (DE); ethanolamine (DE); ethanolamine (DE); ethanolamine (DE); more	O60271	2612.25	22
1935	M(+42.01)E(+43.04)LGE(+43.04)LLYN	-	-	MELGELLYN	K	Acetylation (Protein N-term); ethanolamine (DE); ethanolamine (DE)	Q9BTE1	1208.61	9
1936	M(+42.01)E(+43.04)LITILE(+43.04)	-	-	MELITILE	K	Acetylation (Protein N-term); ethanolamine (DE); ethanolamine (DE)	Q14974	1088.62	8
1937	M(+42.01)E(+43.04)LLC(+57.02)C(+57.02)E(+43.04)GT	-	-	MELLCCEGT	R	Acetylation (Protein N-term); ethanolamine (DE); Carbamidomethylation; Carbamidomethylation; ethanolamine (DE)	P30281	1239.53	9
1938	M(+42.01)E(+43.04)LLGE(+43.04)YVGQE(+43.04)GKPQ	-	-	MELLGEYVGQEGKPQ	K	Acetylation (Protein N-term); ethanolamine (DE); ethanolamine (DE); ethanolamine (DE)	Q9BXV9	1847.95	15
1939	M(+42.01)E(+43.04)LLGEYVGQE(+43.04)GKPQ	-	-	MELLGEYVGQEGKPQ	K	Acetylation (Protein N-term); ethanolamine (DE); ethanolamine (DE)	Q9BXV9	1804.9	15
1940	M(+42.01)E(+43.04)LPSGPGPE(+43.04)	-	-	MELPSGPGPE	R	Acetylation (Protein N-term); ethanolamine (DE); ethanolamine (DE)	Q9Y679	1140.55	10
1941	M(+42.01)E(+43.04)LQPPE(+43.04)ASIAVV	-	-	MELQPPEASIAVV	S	Acetylation (Protein N-term); ethanolamine (DE); ethanolamine (DE)	P08195	1510.81	13
1942	M(+42.01)E(+43.04)LQPPE(+43.04)ASIAVVSIP	-	-	MELQPPEASIAVVSIP	R	Acetylation (Protein N-term); ethanolamine (DE); ethanolamine (DE)	P08195	1807.98	16
1943	M(+42.01)E(+43.04)LQTLQE(+43.04)AL	-	-	MELQTLQEAL	K	Acetylation (Protein N-term); ethanolamine (DE); ethanolamine (DE)	Q96BD5	1302.69	10
1944	M(+42.01)E(+43.04)LSAVGE(+43.04)	-，-	-，-	MELSAVGE	R，R	Acetylation (Protein N-term); ethanolamine (DE); ethanolamine (DE)	O95503，Q9HC52	962.474	8
1945	M(+42.01)E(+43.04)LSD(+43.04)ANL	-	-	MELSDANL	Q	Acetylation (Protein N-term); ethanolamine (DE); ethanolamine (DE)	P55060	1019.5	8
1946	M(+42.01)E(+43.04)LSD(+43.04)ANLQ	-	-	MELSDANLQ	T	Acetylation (Protein N-term); ethanolamine (DE); ethanolamine (DE)	P55060	1147.55	9
1947	M(+42.01)E(+43.04)LSD(+43.04)ANLQTLTE(+43.04)YL	-	-	MELSDANLQTLTEYL	K	Acetylation (Protein N-term); ethanolamine (DE); ethanolamine (DE); ethanolamine (DE)	P55060	1910.97	15
1948	M(+42.01)E(+43.04)M(+15.99)TE(+43.04)M(+15.99)TGVSL	-	-	MEMTEMTGVSL	K	Acetylation (Protein N-term); ethanolamine (DE); Oxidation (M); ethanolamine (DE); Oxidation (M)	Q96PZ0	1387.6	11
1949	M(+42.01)E(+43.04)M(+15.99)TE(+43.04)MTGVSL	-	-	MEMTEMTGVSL	K	Acetylation (Protein N-term); ethanolamine (DE); Oxidation (M); ethanolamine (DE)	Q96PZ0	1371.61	11
1950	M(+42.01)E(+43.04)MTE(+43.04)MTGVSL	-	-	MEMTEMTGVSL	K	Acetylation (Protein N-term); ethanolamine (DE); ethanolamine (DE)	Q96PZ0	1355.61	11
1951	M(+42.01)E(+43.04)NE(+43.04)PD(+43.04)HE(+43.04)NVE(+43.04)QSLC(+57.02)A	-	-	MENEPDHENVEQSLCA	K	Acetylation (Protein N-term); ethanolamine (DE); ethanolamine (DE); ethanolamine (DE); ethanolamine (DE); more	Q8N3P4	2157.98	16
1952	M(+42.01)E(+43.04)NMAE(+43.04)E(+43.04)E(+43.04)LLPLE(+43.04)	-	-	MENMAEEELLPLE	K	Acetylation (Protein N-term); ethanolamine (DE); ethanolamine (DE); ethanolamine (DE); ethanolamine (DE); more	Q7Z2T5	1803.91	13
1953	M(+42.01)E(+43.04)NQVLTPHVYWAQ	-	-	MENQVLTPHVYWAQ	R	Acetylation (Protein N-term); ethanolamine (DE)	Q9P035	1799.87	14
1954	M(+42.01)E(+43.04)NSQLC(+57.02)	-	-	MENSQLC	K	Acetylation (Protein N-term); ethanolamine (DE); Carbamidomethylation	Q13151	965.395	7
1955	M(+42.01)E(+43.04)PAAGSSME(+43.04)PSAD(+43.04)	-	-	MEPAAGSSMEPSAD	W	Acetylation (Protein N-term); ethanolamine (DE); ethanolamine (DE); ethanolamine (DE)	P42771	1549.68	14
1956	M(+42.01)E(+43.04)PAAGSSME(+43.04)PSAD(+43.04)WLATAAA	-	-	MEPAAGSSMEPSADWLATAAA	R	Acetylation (Protein N-term); ethanolamine (DE); ethanolamine (DE); ethanolamine (DE)	P42771	2234.03	21
1957	M(+42.01)E(+43.04)PAE(+43.04)QPSE(+43.04)LVSAE(+43.04)G	-	-	MEPAEQPSELVSAEG	R	Acetylation (Protein N-term); ethanolamine (DE); ethanolamine (DE); ethanolamine (DE); ethanolamine (DE)	P47224	1786.88	15
1958	M(+42.01)E(+43.04)PAE(+43.04)QPSE(+43.04)LVSAE(+43.04)GR	-	-	MEPAEQPSELVSAEGR	N	Acetylation (Protein N-term); ethanolamine (DE); ethanolamine (DE); ethanolamine (DE); ethanolamine (DE)	P47224	1942.98	16
1959	M(+42.01)E(+43.04)PAE(+43.04)QPSE(+43.04)LVSAE(+43.04)GRN	-	-	MEPAEQPSELVSAEGRN	R	Acetylation (Protein N-term); ethanolamine (DE); ethanolamine (DE); ethanolamine (DE); ethanolamine (DE)	P47224	2057.02	17
1960	M(+42.01)E(+43.04)PAE(+43.04)QPSE(+43.04)LVSAEG(+43.04)	-	-	MEPAEQPSELVSAEG	R	Acetylation (Protein N-term); ethanolamine (DE); ethanolamine (DE); ethanolamine (DE); ethanolamine (C-term)	P47224	1786.88	15
1961	M(+42.01)E(+43.04)PAE(+43.04)QPSE(+43.04)LVSAEGRN(+43.04)	-	-	MEPAEQPSELVSAEGRN	R	Acetylation (Protein N-term); ethanolamine (DE); ethanolamine (DE); ethanolamine (DE); ethanolamine (C-term)	P47224	2057.02	17
1962	M(+42.01)E(+43.04)PAGPC(+57.02)GFC(+57.02)PAGE(+43.04)VQPA	-	-	MEPAGPCGFCPAGEVQPA	R	Acetylation (Protein N-term); ethanolamine (DE); Carbamidomethylation; Carbamidomethylation; ethanolamine (DE)	Q9UHR6	2001.87	18
1963	M(+42.01)E(+43.04)PAME(+43.04)PE(+43.04)TLE(+43.04)A	-	-	MEPAMEPETLEA	R	Acetylation (Protein N-term); ethanolamine (DE); ethanolamine (DE); ethanolamine (DE); ethanolamine (DE)	Q9UJY5	1560.75	12
1964	M(+42.01)E(+43.04)PAME(+43.04)PE(+43.04)TLEA(+43.04)	-	-	MEPAMEPETLEA	R	Acetylation (Protein N-term); ethanolamine (DE); ethanolamine (DE); ethanolamine (DE); ethanolamine (C-term)	Q9UJY5	1560.75	12
1965	M(+42.01)E(+43.04)PAPGLVE(+43.04)QP	-	-	MEPAPGLVEQP	K	Acetylation (Protein N-term); ethanolamine (DE); ethanolamine (DE)	Q96EY9	1294.66	11
1966	M(+42.01)E(+43.04)PAPSE(+43.04)V	-	-	MEPAPSEV	R	Acetylation (Protein N-term); ethanolamine (DE); ethanolamine (DE)	Q9Y4R8	986.474	8
1967	M(+42.01)E(+43.04)PAVGGPGPLIVNN	-	-	MEPAVGGPGPLIVNN	K	Acetylation (Protein N-term); ethanolamine (DE)	Q5VSL9	1548.8	15
1968	M(+42.01)E(+43.04)PAVSE(+43.04)PM	-	-	MEPAVSEPM	R	Acetylation (Protein N-term); ethanolamine (DE); ethanolamine (DE)	Q15738	1117.51	9
1969	M(+42.01)E(+43.04)PAVSE(+43.04)PM(+15.99)	-	-	MEPAVSEPM	R	Acetylation (Protein N-term); ethanolamine (DE); ethanolamine (DE); Oxidation (M)	Q15738	1133.51	9
1970	M(+42.01)E(+43.04)PE(+43.04)APR	-	-	MEPEAPR	R	Acetylation (Protein N-term); ethanolamine (DE); ethanolamine (DE)	P48163	956.475	7
1971	M(+42.01)E(+43.04)PE(+43.04)QM(+15.99)LE(+43.04)GQTQVAEN(+43.04)	-	-	MEPEQMLEGQTQVAEN	P	Acetylation (Protein N-term); ethanolamine (DE); ethanolamine (DE); Oxidation (M); ethanolamine (DE); more	Q9C005	2062.97	16
1972	M(+42.01)E(+43.04)PE(+43.04)QMLE(+43.04)GQTQVAE(+43.04)NPH	-	-	MEPEQMLEGQTQVAENPH	S	Acetylation (Protein N-term); ethanolamine (DE); ethanolamine (DE); ethanolamine (DE); ethanolamine (DE)	Q9C005	2281.08	18
1973	M(+42.01)E(+43.04)PE(+43.04)QMLE(+43.04)GQTQVAE(+43.04)NPHSEYGLTDNVE(+43.04)(+43.04)	-	-	MEPEQMLEGQTQVAENPHSEYGLTDNVE	R	Acetylation (Protein N-term); ethanolamine (DE); ethanolamine (DE); ethanolamine (DE); ethanolamine (DE); more	Q9C005	3474.64	28
1974	M(+42.01)E(+43.04)PE(+43.04)QMLE(+43.04)GQTQVAEN(+43.04)	-	-	MEPEQMLEGQTQVAEN	P	Acetylation (Protein N-term); ethanolamine (DE); ethanolamine (DE); ethanolamine (DE); ethanolamine (C-term)	Q9C005	2046.97	16
1975	M(+42.01)E(+43.04)PGPD(+43.04)GPAASGPAAI	-	-	MEPGPDGPAASGPAAI	R	Acetylation (Protein N-term); ethanolamine (DE); ethanolamine (DE)	P19623	1564.76	16
1976	M(+42.01)E(+43.04)PGPDGPAASGPAAI	-	-	MEPGPDGPAASGPAAI	R	Acetylation (Protein N-term); ethanolamine (DE)	P19623	1521.71	16
1977	M(+42.01)E(+43.04)PLAAYPL	-	-	MEPLAAYPL	K	Acetylation (Protein N-term); ethanolamine (DE)	Q8TED1	1088.56	9
1978	M(+42.01)E(+43.04)PPGGSLGPG	-	-	MEPPGGSLGPG	R	Acetylation (Protein N-term); ethanolamine (DE)	O60610	1082.51	11
1979	M(+42.01)E(+43.04)PPGGSLGPGR	-	-	MEPPGGSLGPGR	G	Acetylation (Protein N-term); ethanolamine (DE)	O60610	1238.61	12
1980	M(+42.01)E(+43.04)PPGGSLGPGRGT	-	-	MEPPGGSLGPGRGT	R	Acetylation (Protein N-term); ethanolamine (DE)	O60610	1396.68	14
1981	M(+42.01)E(+43.04)PPLPVGAQPLATVE(+43.04)GM(+15.99)E(+43.04)M	-	-	MEPPLPVGAQPLATVEGMEM	K	Acetylation (Protein N-term); ethanolamine (DE); ethanolamine (DE); Oxidation (M); ethanolamine (DE)	Q01968	2283.13	20
1982	M(+42.01)E(+43.04)PPLPVGAQPLATVE(+43.04)GME(+43.04)M	-	-	MEPPLPVGAQPLATVEGMEM	K	Acetylation (Protein N-term); ethanolamine (DE); ethanolamine (DE); ethanolamine (DE)	Q01968	2267.14	20
1983	M(+42.01)E(+43.04)PPLPVGAQPLATVE(+43.04)GMEM(+15.99)(+43.04)	-	-	MEPPLPVGAQPLATVEGMEM	K	Acetylation (Protein N-term); ethanolamine (DE); ethanolamine (DE); Oxidation (M); ethanolamine (C-term)	Q01968	2283.13	20
1984	M(+42.01)E(+43.04)PPLPVGAQPLATVE(+43.04)GMEM(+43.04)	-	-	MEPPLPVGAQPLATVEGMEM	K	Acetylation (Protein N-term); ethanolamine (DE); ethanolamine (DE); ethanolamine (C-term)	Q01968	2267.14	20
1985	M(+42.01)E(+43.04)PPSC(+57.02)IQD(+43.04)E(+43.04)PFPHPLE(+43.04)PEPGVSAQPGPGKPSD(+43.04)(+43.04)	-	-	MEPPSCIQDEPFPHPLEPEPGVSAQPGPGKPSD	K	Acetylation (Protein N-term); ethanolamine (DE); Carbamidomethylation; ethanolamine (DE); ethanolamine (DE); more	O60343	3822.87	33
1986	M(+42.01)E(+43.04)PPSC(+57.02)IQD(+43.04)E(+43.04)PFPHPLEPE(+43.04)PGVSAQPGPGKPSD(+43.04)(+43.04)	-	-	MEPPSCIQDEPFPHPLEPEPGVSAQPGPGKPSD	K	Acetylation (Protein N-term); ethanolamine (DE); Carbamidomethylation; ethanolamine (DE); ethanolamine (DE); more	O60343	3822.87	33
1987	M(+42.01)E(+43.04)PRPTAPSSGAPGLAGVGE(+43.04)TPSAAALAAA	-	-	MEPRPTAPSSGAPGLAGVGETPSAAALAAA	R	Acetylation (Protein N-term); ethanolamine (DE); ethanolamine (DE)	P55011	2832.44	30
1988	M(+42.01)E(+43.04)PSGSE(+43.04)QLFE(+43.04)D(+43.04)PD(+43.04)PGG	-	-	MEPSGSEQLFEDPDPGG	K	Acetylation (Protein N-term); ethanolamine (DE); ethanolamine (DE); ethanolamine (DE); ethanolamine (DE); more	O94876	2047.95	17
1989	M(+42.01)E(+43.04)PSSLE(+43.04)LPAD(+43.04)TVQ	-	-	MEPSSLELPADTVQ	R	Acetylation (Protein N-term); ethanolamine (DE); ethanolamine (DE); ethanolamine (DE)	Q16719	1686.85	14
1990	M(+42.01)E(+43.04)PSSWSGSE(+43.04)SPAE(+43.04)NME(+43.04)	-	-	MEPSSWSGSESPAENME	R	Acetylation (Protein N-term); ethanolamine (DE); ethanolamine (DE); ethanolamine (DE); ethanolamine (DE)	P28347	2067.89	17
1991	M(+42.01)E(+43.04)PVGC(+57.02)C(+57.02)GE(+43.04)C(+57.02)	-	-	MEPVGCCGEC	R	Acetylation (Protein N-term); ethanolamine (DE); Carbamidomethylation; Carbamidomethylation; ethanolamine (DE); more	Q8NEZ5	1325.49	10
1992	M(+42.01)E(+43.04)PVGC(+57.02)C(+57.02)GEC(+57.02)(+43.04)	-	-	MEPVGCCGEC	R	Acetylation (Protein N-term); ethanolamine (DE); Carbamidomethylation; Carbamidomethylation; Carbamidomethylation; more	Q8NEZ5	1325.49	10
1993	M(+42.01)E(+43.04)QLSSANT	-	-	MEQLSSANT	R	Acetylation (Protein N-term); ethanolamine (DE)	P30740	1064.48	9
1994	M(+42.01)E(+43.04)QPGAAASGAGGGSE(+43.04)E(+43.04)PGGG	-	-	MEQPGAAASGAGGGSEEPGGG	R	Acetylation (Protein N-term); ethanolamine (DE); ethanolamine (DE); ethanolamine (DE)	O60879	1943.86	21
1995	M(+42.01)E(+43.04)QSPPPAPE(+43.04)PTQGPTPA	-	-	MEQSPPPAPEPTQGPTPA	R	Acetylation (Protein N-term); ethanolamine (DE); ethanolamine (DE)	Q96AY4	1958.94	18
1996	M(+42.01)E(+43.04)QVAE(+43.04)GA	-	-	MEQVAEGA	R	Acetylation (Protein N-term); ethanolamine (DE); ethanolamine (DE)	Q99549	961.454	8
1997	M(+42.01)E(+43.04)QVEILR	-	-	MEQVEILR	K	Acetylation (Protein N-term); ethanolamine (DE)	Q05209	1101.59	8
[truncated: 2,427 more rows]

## Sheet: Table S2b
Table S2. List of identified terminal peptides from Hela cell using LysargiNase as protease .
Table S2b. List of identified C-terminal peptides.
Number	Peptide	secaaBefore	aaBefore	pepSeq	aaAfter	PTM	Accession	Mass	Length
1	AAAAAAAAAPAAAATAPTTAATTAATAAQ(+43.04)	T	K	AAAAAAAAAPAAAATAPTTAATTAATAAQ	-	ethanolamine (C-term)	P37108	2410.25	29
2	AAAAAAAPAAAATAPTTAATTAATAAQ(+43.04)	A	A	AAAAAAAPAAAATAPTTAATTAATAAQ	-	ethanolamine (C-term)	P37108	2268.17	27
3	AAAAAPAAAATAPTTAATTAATAAQ	A	A	AAAAAPAAAATAPTTAATTAATAAQ	-		P37108	2083.05	25
4	AAAAAPAAAATAPTTAATTAATAAQ(+43.04)	A	A	AAAAAPAAAATAPTTAATTAATAAQ	-	ethanolamine (C-term)	P37108	2126.1	25
5	AAAAPAAAATAPTTAATTAATAAQ	A	A	AAAAPAAAATAPTTAATTAATAAQ	-		P37108	2012.02	24
6	AAAAPAAAATAPTTAATTAATAAQ(+43.04)	A	A	AAAAPAAAATAPTTAATTAATAAQ	-	ethanolamine (C-term)	P37108	2055.06	24
7	AAAATAPTTAATTAATAAQ(+43.04)	A	P	AAAATAPTTAATTAATAAQ	-	ethanolamine (C-term)	P37108	1673.86	19
8	AAAGPQGPGTGE(+43.04)(+43.04)	V	I	AAAGPQGPGTGE	-	ethanolamine (C-term); ethanolamine (DE)	P85037	1097.55	12
9	AAALAAAVAQD(+43.04)PAASGAPSS(+43.04)	A	R	AAALAAAVAQDPAASGAPSS	-	ethanolamine (DE); ethanolamine (C-term)	Q8TAE8	1781.93	20
10	AAANPLGMPVPAAAGAQQ(+43.04)	V	I	AAANPLGMPVPAAAGAQQ	-	ethanolamine (C-term)	P68400	1676.87	18
11	AAAPAAAATAPTTAATTAATAAQ	A	A	AAAPAAAATAPTTAATTAATAAQ	-		P37108	1940.98	23
12	AAAPAAAATAPTTAATTAATAAQ(+43.04)	A	A	AAAPAAAATAPTTAATTAATAAQ	-	ethanolamine (C-term)	P37108	1984.02	23
13	AAASSAC(+57.02)AAPSQE(+43.04)AQPE(+43.04)C(+57.02)SPE(+43.04)APPAE(+43.04)AAE(+43.04)(+43.04)	A	A	AAASSACAAPSQEAQPECSPEAPPAEAAE	-	Carbamidomethylation; ethanolamine (DE); ethanolamine (DE); Carbamidomethylation; ethanolamine (DE); more	P29966	3112.46	29
14	AAATAPTTAATTAATAAQ(+43.04)	P	A	AAATAPTTAATTAATAAQ	-	ethanolamine (C-term)	P37108	1602.82	18
15	AAATLLLQGE(+43.04)E(+43.04)E(+43.04)GE(+43.04)E(+43.04)D(+43.04)(+43.04)	E	T	AAATLLLQGEEEGEED	-	ethanolamine (DE); ethanolamine (DE); ethanolamine (DE); ethanolamine (DE); ethanolamine (DE); more	Q00577	1975.06	16
16	AAAVAQD(+43.04)PAASGAPSS(+43.04)	A	L	AAAVAQDPAASGAPSS	-	ethanolamine (DE); ethanolamine (C-term)	Q8TAE8	1455.73	16
17	AAC(+57.02)VSC(+57.02)PAQGVSSVD(+43.04)VA(+43.04)	D	R	AACVSCPAQGVSSVDVA	-	Carbamidomethylation; Carbamidomethylation; ethanolamine (DE); ethanolamine (C-term)	Q8NCG7	1762.83	17
18	AAD(+43.04)PPAE(+43.04)NSSAPE(+43.04)AE(+43.04)QGGAE(+43.04)(+43.04)	T	K	AADPPAENSSAPEAEQGGAE	-	ethanolamine (DE); ethanolamine (DE); ethanolamine (DE); ethanolamine (DE); ethanolamine (C-term); more	P67809	2155.05	20
19	AAE(+43.04)GPSD(+43.04)IPD(+43.04)(+43.04)	I	D	AAEGPSDIPD	-	ethanolamine (DE); ethanolamine (DE); ethanolamine (C-term); ethanolamine (DE)	P42771	1142.59	10
20	AAGGQGHAMIVE(+43.04)AYPK(+43.04)	A	C	AAGGQGHAMIVEAYPK	-	ethanolamine (DE); ethanolamine (C-term)	P55084	1684.87	16
21	AALE(+43.04)AVGGTVVLE(+43.04)(+43.04)	I	K	AALEAVGGTVVLE	-	ethanolamine (DE); ethanolamine (C-term); ethanolamine (DE)	P52815	1356.8	13
22	AALE(+43.04)LIFAGGAP(+43.04)	I	Q	AALELIFAGGAP	-	ethanolamine (DE); ethanolamine (C-term)	Q96S82	1214.7	12
23	AAMLD(+43.04)TVVFK(+43.04)	C	L	AAMLDTVVFK	-	ethanolamine (DE); ethanolamine (C-term)	O00487	1179.67	10
24	AANFLLQQNFD(+43.04)E(+43.04)D(+43.04)	N	L	AANFLLQQNFDED	-	ethanolamine (DE); ethanolamine (DE); ethanolamine (DE)	P54727	1652.82	13
25	AANFLLQQNFD(+43.04)E(+43.04)D(+43.04)(+43.04)	N	L	AANFLLQQNFDED	-	ethanolamine (DE); ethanolamine (DE); ethanolamine (C-term); ethanolamine (DE)	P54727	1695.86	13
26	AANFLLQQNFD(+43.04)ED(+43.04)(+43.04)	N	L	AANFLLQQNFDED	-	ethanolamine (DE); ethanolamine (C-term); ethanolamine (DE)	P54727	1652.82	13
27	AANFLLQQNFDE(+43.04)D(+43.04)(+43.04)	N	L	AANFLLQQNFDED	-	ethanolamine (DE); ethanolamine (C-term); ethanolamine (DE)	P54727	1652.82	13
28	AANFLLSQNFD(+43.04)D(+43.04)E(+43.04)(+43.04)	N	L	AANFLLSQNFDDE	-	ethanolamine (DE); ethanolamine (DE); ethanolamine (C-term); ethanolamine (DE)	P54725	1654.83	13
29	AANFLLSQNFD(+43.04)DE(+43.04)(+43.04)	N	L	AANFLLSQNFDDE	-	ethanolamine (DE); ethanolamine (C-term); ethanolamine (DE)	P54725	1611.79	13
30	AANFLLSQNFDD(+43.04)E(+43.04)(+43.04)	N	L	AANFLLSQNFDDE	-	ethanolamine (DE); ethanolamine (C-term); ethanolamine (DE)	P54725	1611.79	13
31	AANPLGMPVPAAAGAQQ(+43.04)	I	A	AANPLGMPVPAAAGAQQ	-	ethanolamine (C-term)	P68400	1605.83	17
32	AANVGWNNSTFA(+43.04)	M	N	AANVGWNNSTFA	-	ethanolamine (C-term)	P14174	1293.61	12
33	AAPAAAATAPTTAATTAATAAQ	A	A	AAPAAAATAPTTAATTAATAAQ	-		P37108	1869.94	22
34	AAPAAAATAPTTAATTAATAAQ(+43.04)	A	A	AAPAAAATAPTTAATTAATAAQ	-	ethanolamine (C-term)	P37108	1912.99	22
35	AAPAAE(+43.04)PVPAST(+43.04)	V	E	AAPAAEPVPAST	-	ethanolamine (DE); ethanolamine (C-term)	Q16740	1166.63	12
36	AAPM(+15.99)IGYPM(+15.99)PTGYSQ(+43.04)	T	A	AAPMIGYPMPTGYSQ	-	Oxidation (M); Oxidation (M); ethanolamine (C-term)	P17844	1657.75	15
37	AAPM(+15.99)IGYPMPTGYSQ(+43.04)	T	A	AAPMIGYPMPTGYSQ	-	Oxidation (M); ethanolamine (C-term)	P17844	1641.75	15
38	AAPMIGYPM(+15.99)PTGYSQ(+43.04)	T	A	AAPMIGYPMPTGYSQ	-	Oxidation (M); ethanolamine (C-term)	P17844	1641.75	15
39	AAPMIGYPMPTGYSQ(+43.04)	T	A	AAPMIGYPMPTGYSQ	-	ethanolamine (C-term)	P17844	1625.76	15
40	AAPRPPPKPM(+15.99)(+43.04)	A，A	G，G	AAPRPPPKPM	-，-	Oxidation (M); ethanolamine (C-term)	P62854，Q5JNZ5	1119.62	10
41	AAPRPPPKPM(+43.04)	A，A	G，G	AAPRPPPKPM	-，-	ethanolamine (C-term)	P62854，Q5JNZ5	1103.63	10
42	AAPSQE(+43.04)AQPE(+43.04)C(+57.02)SPE(+43.04)APPAE(+43.04)AAE(+43.04)(+43.04)	A	C	AAPSQEAQPECSPEAPPAEAAE	-	ethanolamine (DE); ethanolamine (DE); Carbamidomethylation; ethanolamine (DE); ethanolamine (DE); more	P29966	2494.21	22
43	AASAVPGVAAE(+43.04)QPGVSPSGS(+43.04)	Y	E	AASAVPGVAAEQPGVSPSGS	-	ethanolamine (DE); ethanolamine (C-term)	Q9Y5J6	1823.94	20
44	AASE(+43.04)SLFVSNHAY(+43.04)	G	A	AASESLFVSNHAY	-	ethanolamine (DE); ethanolamine (C-term)	P04075	1480.73	13
45	AASSAC(+57.02)AAPSQE(+43.04)AQPE(+43.04)C(+57.02)SPE(+43.04)APPAE(+43.04)AAE(+43.04)(+43.04)	A	A	AASSACAAPSQEAQPECSPEAPPAEAAE	-	Carbamidomethylation; ethanolamine (DE); ethanolamine (DE); Carbamidomethylation; ethanolamine (DE); more	P29966	3041.42	28
46	AATAPTTAATTAATAAQ(+43.04)	A	A	AATAPTTAATTAATAAQ	-	ethanolamine (C-term)	P37108	1531.78	17
47	AATQVKPAE(+43.04)E(+43.04)(+43.04)	L	E	AATQVKPAEE	-	ethanolamine (DE); ethanolamine (C-term); ethanolamine (DE)	O75935	1171.66	10
48	AAVAQD(+43.04)PAASGAPSS(+43.04)	L	A	AAVAQDPAASGAPSS	-	ethanolamine (DE); ethanolamine (C-term)	Q8TAE8	1384.69	15
49	AAVE(+43.04)GTVE(+43.04)AGATVE(+43.04)STAC(+57.02)(+43.04)	S	R	AAVEGTVEAGATVESTAC	-	ethanolamine (DE); ethanolamine (DE); ethanolamine (DE); Carbamidomethylation; ethanolamine (C-term)	P49321	1893.95	18
50	AAYYAQTSPQGM(+15.99)PQHPPAPQGQ(+43.04)	Q	Q	AAYYAQTSPQGMPQHPPAPQGQ	-	Oxidation (M); ethanolamine (C-term)	Q96AE4	2383.1	22
51	AAYYAQTSPQGMPQHPPAPQGQ(+43.04)	Q	Q	AAYYAQTSPQGMPQHPPAPQGQ	-	ethanolamine (C-term)	Q96AE4	2367.11	22
52	AAYYGQTPGPGGPQPPPTQQGQQQAQ(+43.04)	Q	Q	AAYYGQTPGPGGPQPPPTQQGQQQAQ	-	ethanolamine (C-term)	Q92945	2694.28	26
53	AC(+57.02)AAGGQGHAMIVE(+43.04)AYPK(+43.04)	V	A	ACAAGGQGHAMIVEAYPK	-	Carbamidomethylation; ethanolamine (DE); ethanolamine (C-term)	P55084	1915.94	18
54	AC(+57.02)AAPSQE(+43.04)AQPE(+43.04)C(+57.02)SPE(+43.04)APPAE(+43.04)AAE(+43.04)(+43.04)	S	S	ACAAPSQEAQPECSPEAPPAEAAE	-	Carbamidomethylation; ethanolamine (DE); ethanolamine (DE); Carbamidomethylation; ethanolamine (DE); more	P29966	2725.28	24
55	AC(+57.02)LNQALC(+57.02)PAAQGL(+43.04)	C	H	ACLNQALCPAAQGL	-	Carbamidomethylation; Carbamidomethylation; ethanolamine (C-term)	P78549	1528.75	14
56	AC(+57.02)QGKY(+155.14)TPSGQAGAAASE(+43.04)SLFVSNHAY(+43.04)	S	L	ACQGKYTPSGQAGAAASESLFVSNHAY	-	Carbamidomethylation; EDC(Y); ethanolamine (DE); ethanolamine (C-term)	P04075	3012.49	27
57	AD(+43.04)C(+57.02)GQLE(+43.04)(+43.04)	T，Y	I，A	ADCGQLE	-，I	ethanolamine (DE); Carbamidomethylation; ethanolamine (C-term); ethanolamine (DE)	P62937，P58546	920.438	7
58	AD(+43.04)GYE(+43.04)PPVQE(+43.04)SV(+43.04)	E	R	ADGYEPPVQESV	-	ethanolamine (DE); ethanolamine (DE); ethanolamine (DE); ethanolamine (C-term)	P61247	1461.75	12
59	AD(+43.04)PPAE(+43.04)NSSAPE(+43.04)AE(+43.04)QGGAE(+43.04)(+43.04)	K	A	ADPPAENSSAPEAEQGGAE	-	ethanolamine (DE); ethanolamine (DE); ethanolamine (DE); ethanolamine (DE); ethanolamine (C-term); more	P67809	2084.01	19
60	AD(+43.04)PVPE(+43.04)E(+43.04)E(+43.04)E(+43.04)GFEGGD(+43.04)(+43.04)	W	D	ADPVPEEEEGFEGGD	-	ethanolamine (DE); ethanolamine (DE); ethanolamine (DE); ethanolamine (DE); ethanolamine (DE); more	Q16643	1876.92	15
61	AD(+43.04)YGGYD(+43.04)GGYVQD(+43.04)YE(+43.04)D(+43.04)FM(+15.99)(+43.04)	D	L	ADYGGYDGGYVQDYEDFM	-	ethanolamine (DE); ethanolamine (DE); ethanolamine (DE); ethanolamine (DE); ethanolamine (DE); more	O75822	2338.02	18
62	AD(+43.04)YGGYD(+43.04)GGYVQD(+43.04)YE(+43.04)D(+43.04)FM(+43.04)	D	L	ADYGGYDGGYVQDYEDFM	-	ethanolamine (DE); ethanolamine (DE); ethanolamine (DE); ethanolamine (DE); ethanolamine (DE); more	O75822	2322.03	18
63	AD(+43.04)YGGYDGGYVQD(+43.04)YE(+43.04)D(+43.04)FM(+15.99)(+43.04)	D	L	ADYGGYDGGYVQDYEDFM	-	ethanolamine (DE); ethanolamine (DE); ethanolamine (DE); ethanolamine (DE); Oxidation (M); more	O75822	2294.98	18
64	AD(+43.04)YGGYDGGYVQD(+43.04)YE(+43.04)D(+43.04)FM(+43.04)	D	L	ADYGGYDGGYVQDYEDFM	-	ethanolamine (DE); ethanolamine (DE); ethanolamine (DE); ethanolamine (DE); ethanolamine (C-term)	O75822	2278.98	18
65	AE(+43.04)AE(+43.04)PE(+43.04)PE(+43.04)LA(+43.04)	D	E	AEAEPEPELA	-	ethanolamine (DE); ethanolamine (DE); ethanolamine (DE); ethanolamine (DE); ethanolamine (C-term)	Q92791	1269.69	10
66	AE(+43.04)D(+43.04)D(+43.04)SILK(+43.04)	E	L	AEDDSILK	-	ethanolamine (DE); ethanolamine (DE); ethanolamine (DE); ethanolamine (C-term)	P56385	1061.61	8
67	AE(+43.04)E(+43.04)FLTASQE(+43.04)AL(+43.04)	K	R	AEEFLTASQEAL	-	ethanolamine (DE); ethanolamine (DE); ethanolamine (DE); ethanolamine (C-term)	Q14738	1479.79	12
68	AE(+43.04)GLFYSE(+43.04)VHPHY(+43.04)	I	S	AEGLFYSEVHPHY	-	ethanolamine (DE); ethanolamine (DE); ethanolamine (C-term)	Q9BRR6	1676.83	13
69	AE(+43.04)GPSD(+43.04)IPD(+43.04)(+43.04)	D	A	AEGPSDIPD	-	ethanolamine (DE); ethanolamine (DE); ethanolamine (C-term); ethanolamine (DE)	P42771	1071.56	9
70	AE(+43.04)LAAQGVTE(+43.04)D(+43.04)C(+57.02)LE(+43.04)QQ(+43.04)	V	L	AELAAQGVTEDCLEQQ	-	ethanolamine (DE); ethanolamine (DE); ethanolamine (DE); Carbamidomethylation; ethanolamine (DE); more	Q86UW9	1976	16
71	AE(+43.04)LD(+43.04)AYMAQTD(+43.04)PE(+43.04)TND(+43.04)	L	D	AELDAYMAQTDPETND	-	ethanolamine (DE); ethanolamine (DE); ethanolamine (DE); ethanolamine (DE); ethanolamine (DE)	Q9Y3Y2	1997.94	16
72	AE(+43.04)LD(+43.04)AYMAQTD(+43.04)PE(+43.04)TND(+43.04)(+43.04)	L	D	AELDAYMAQTDPETND	-	ethanolamine (DE); ethanolamine (DE); ethanolamine (DE); ethanolamine (DE); ethanolamine (C-term); more	Q9Y3Y2	2040.98	16
73	AE(+43.04)LE(+43.04)TE(+43.04)D(+43.04)GMQE(+43.04)SP(+43.04)	Q	L	AELETEDGMQESP	-	ethanolamine (DE); ethanolamine (DE); ethanolamine (DE); ethanolamine (DE); ethanolamine (DE); more	Q96QG7	1692.84	13
74	AE(+43.04)LSQPLTAGGAISE(+43.04)LL(+43.04)	V	Q	AELSQPLTAGGAISELL	-	ethanolamine (DE); ethanolamine (DE); ethanolamine (C-term)	Q15291	1798.02	17
75	AE(+43.04)LVLPPQQ(+43.04)	P	F	AELVLPPQQ	-	ethanolamine (DE); ethanolamine (C-term)	P19971	1079.63	9
76	AE(+43.04)NATSGE(+43.04)TLE(+43.04)E(+43.04)NE(+43.04)AGD(+43.04)(+43.04)	K	T	AENATSGETLEENEAGD	-	ethanolamine (DE); ethanolamine (DE); ethanolamine (DE); ethanolamine (DE); ethanolamine (DE); more	Q9UQ80	2037	17
77	AE(+43.04)PRPPPTQE(+43.04)AA(+43.04)	L	D	AEPRPPPTQEAA	-	ethanolamine (DE); ethanolamine (DE); ethanolamine (C-term)	Q9Y285	1391.75	12
78	AE(+43.04)SLTND(+43.04)NE(+43.04)TNS(+43.04)	D	L	AESLTNDNETNS	-	ethanolamine (DE); ethanolamine (DE); ethanolamine (DE); ethanolamine (C-term)	Q96FV9	1465.7	12
79	AFYGQTLGQAQAHSQE(+43.04)Q(+43.04)	Q	V	AFYGQTLGQAQAHSQEQ	-	ethanolamine (DE); ethanolamine (C-term)	Q96I24	1948.94	17
80	AGAAASE(+43.04)SLFVSNHAY(+43.04)	G	Q	AGAAASESLFVSNHAY	-	ethanolamine (DE); ethanolamine (C-term)	P04075	1679.83	16
81	AGAAPRPPPKPM(+15.99)(+43.04)	R，R	P，P	AGAAPRPPPKPM	-，-	Oxidation (M); ethanolamine (C-term)	P62854，Q5JNZ5	1247.68	12
82	AGAAPRPPPKPM(+43.04)	R，R	P，P	AGAAPRPPPKPM	-，-	ethanolamine (C-term)	P62854，Q5JNZ5	1231.69	12
83	AGALVHSE(+43.04)(+43.04)	Q	G	AGALVHSE	-	ethanolamine (C-term); ethanolamine (DE)	P21291	868.477	8
84	AGATPE(+43.04)APAAAATATTGE(+43.04)(+43.04)	D	L	AGATPEAPAAAATATTGE	-	ethanolamine (DE); ethanolamine (C-term); ethanolamine (DE)	Q9UGR2	1685.86	18
85	AGATVE(+43.04)STAC(+57.02)(+43.04)	V	E	AGATVESTAC	-	ethanolamine (DE); Carbamidomethylation; ethanolamine (C-term)	P49321	1051.5	10
86	AGE(+43.04)APTE(+43.04)NPAPPTQQSSAE(+43.04)(+43.04)	A	K	AGEAPTENPAPPTQQSSAE	-	ethanolamine (DE); ethanolamine (DE); ethanolamine (C-term); ethanolamine (DE)	P16989	2053.01	19
87	AGE(+43.04)E(+43.04)C(+57.02)D(+43.04)AAE(+43.04)GAE(+43.04)N	D	S	AGEECDAAEGAEN	-	ethanolamine (DE); ethanolamine (DE); Carbamidomethylation; ethanolamine (DE); ethanolamine (DE); more	P27348	1536.68	13
88	AGE(+43.04)E(+43.04)C(+57.02)D(+43.04)AAE(+43.04)GAE(+43.04)N(+43.04)	D	S	AGEECDAAEGAEN	-	ethanolamine (DE); ethanolamine (DE); Carbamidomethylation; ethanolamine (DE); ethanolamine (DE); more	P27348	1579.73	13
89	AGE(+43.04)E(+43.04)GGE(+43.04)APQE(+43.04)PQS(+43.04)	D	N	AGEEGGEAPQEPQS	-	ethanolamine (DE); ethanolamine (DE); ethanolamine (DE); ethanolamine (DE); ethanolamine (C-term)	P31947	1599.79	14
90	AGGANYD(+43.04)AQTE(+43.04)(+43.04)	K	K	AGGANYDAQTE	-	ethanolamine (DE); ethanolamine (C-term); ethanolamine (DE)	Q14019	1224.57	11
91	AGGE(+43.04)E(+43.04)SQFE(+43.04)MD(+43.04)I(+43.04)	K	R	AGGEESQFEMDI	-	ethanolamine (DE); ethanolamine (DE); ethanolamine (DE); ethanolamine (DE); ethanolamine (C-term)	Q13541	1526.74	12
92	AGGMPGGMPGGFPGGGAPPSGGASSGPTIE(+43.04)E(+43.04)VD(+43.04)(+43.04)	Q	S	AGGMPGGMPGGFPGGGAPPSGGASSGPTIEEVD	-	ethanolamine (DE); ethanolamine (DE); ethanolamine (C-term); ethanolamine (DE)	P11142	3026.42	33
93	AGIFQSVK(+43.04)	R	K	AGIFQSVK	-	ethanolamine (C-term)	P09669	891.518	8
94	AGPPNYPFSD(+43.04)E(+43.04)Y(+43.04)	I，I	F，F	AGPPNYPFSDEY	-，-	ethanolamine (DE); ethanolamine (DE); ethanolamine (C-term)	P52895，Q04828	1484.69	12
95	AGSQSQVE(+43.04)TE(+43.04)A(+43.04)	N	T	AGSQSQVETEA	-	ethanolamine (DE); ethanolamine (DE); ethanolamine (C-term)	Q02790	1234.62	11
96	AGYSGQNSM(+15.99)GGYD(+43.04)(+43.04)	Y	G	AGYSGQNSMGGYD	-	Oxidation (M); ethanolamine (C-term); ethanolamine (DE)	P52597	1407.57	13
97	AGYSGQNSMGGYD(+43.04)(+43.04)	Y	G	AGYSGQNSMGGYD	-	ethanolamine (C-term); ethanolamine (DE)	P52597	1391.58	13
98	AHIIPFLG(+43.04)	F	Y	AHIIPFLG	-	ethanolamine (C-term)	P50897	909.544	8
99	AIC(+57.02)AGD(+43.04)AE(+43.04)D(+43.04)Y(+43.04)	L	L	AICAGDAEDY	-	Carbamidomethylation; ethanolamine (DE); ethanolamine (DE); ethanolamine (DE); ethanolamine (C-term)	Q9UJ72	1255.59	10
100	AID(+43.04)D(+43.04)LMPAQK(+43.04)	G	Q	AIDDLMPAQK	-	ethanolamine (DE); ethanolamine (DE); ethanolamine (C-term)	P12277	1229.68	10
101	AID(+43.04)MAD(+43.04)E(+43.04)D(+43.04)YE(+43.04)F(+43.04)	A	W	AIDMADEDYEF	-	ethanolamine (DE); ethanolamine (DE); ethanolamine (DE); ethanolamine (DE); ethanolamine (DE); more	P11387	1575.76	11
102	AID(+43.04)MAD(+43.04)E(+43.04)DYE(+43.04)F(+43.04)	A	W	AIDMADEDYEF	-	ethanolamine (DE); ethanolamine (DE); ethanolamine (DE); ethanolamine (DE); ethanolamine (C-term)	P11387	1532.72	11
103	AIE(+43.04)E(+43.04)HC(+57.02)TFGD(+43.04)PIV(+43.04)	N	L	AIEEHCTFGDPIV	-	ethanolamine (DE); ethanolamine (DE); Carbamidomethylation; ethanolamine (DE); ethanolamine (C-term)	Q9UBR2	1658.85	13
104	AIE(+43.04)E(+43.04)TE(+43.04)GFGQE(+43.04)(+43.04)	L，L，L	F，F，Y	AIEETEGFGQE	-，-，-	ethanolamine (DE); ethanolamine (DE); ethanolamine (DE); ethanolamine (C-term); ethanolamine (DE)	Q9H0M0，Q96J02，O00308	1423.73	11
105	AIHPTSSE(+43.04)E(+43.04)LVTLR(+43.04)	T	V	AIHPTSSEELVTLR	-	ethanolamine (DE); ethanolamine (DE); ethanolamine (C-term)	P00390	1680.95	14
106	AIIGTQD(+43.04)IVFGE(+43.04)VD(+43.04)R(+43.04)	V	V	AIIGTQDIVFGEVDR	-	ethanolamine (DE); ethanolamine (DE); ethanolamine (DE); ethanolamine (C-term)	O75306	1804.02	15
107	AIQE(+43.04)C(+57.02)SE(+43.04)GFGLA(+43.04)	L	L	AIQECSEGFGLA	-	ethanolamine (DE); Carbamidomethylation; ethanolamine (DE); ethanolamine (C-term)	Q7Z6Z7	1409.7	12
108	AISE(+43.04)D(+43.04)QAVGPAD(+43.04)IPC(+57.02)D(+43.04)STGQTST	H	G	AISEDQAVGPADIPCDSTGQTST	-	ethanolamine (DE); ethanolamine (DE); ethanolamine (DE); Carbamidomethylation; ethanolamine (DE)	Q9H773	2491.19	23
109	AISE(+43.04)D(+43.04)QAVGPAD(+43.04)IPC(+57.02)D(+43.04)STGQTST(+43.04)	H	G	AISEDQAVGPADIPCDSTGQTST	-	ethanolamine (DE); ethanolamine (DE); ethanolamine (DE); Carbamidomethylation; ethanolamine (DE); more	Q9H773	2534.23	23
110	AIVE(+43.04)QSWND(+43.04)S(+43.04)	V	S	AIVEQSWNDS	-	ethanolamine (DE); ethanolamine (DE); ethanolamine (C-term)	P63146	1276.64	10
111	AKNFGPKGFGFGQGAGALVHSE(+43.04)(+43.04)	C	Y	AKNFGPKGFGFGQGAGALVHSE	-	ethanolamine (C-term); ethanolamine (DE)	P21291	2261.17	22
112	AKPGQFIHTNWTGHGGTVSSSSYNA(+43.04)	L	L	AKPGQFIHTNWTGHGGTVSSSSYNA	-	ethanolamine (C-term)	P52209	2646.26	25
113	AKSATAIPAN	P	P	AKSATAIPAN	-		Q96C57	942.513	10
114	ALAAAVAQD(+43.04)PAASGAPSS(+43.04)	A	A	ALAAAVAQDPAASGAPSS	-	ethanolamine (DE); ethanolamine (C-term)	Q8TAE8	1639.85	18
115	ALC(+57.02)SQTQVME(+43.04)VGNE(+43.04)E(+43.04)(+43.04)	Y	H	ALCSQTQVMEVGNEE	-	Carbamidomethylation; ethanolamine (DE); ethanolamine (DE); ethanolamine (C-term); ethanolamine (DE)	Q9NPH0	1865.9	15
116	ALFVTAAQTSGLPSSVR(+43.04)	N，N	N，N	ALFVTAAQTSGLPSSVR	-，-	ethanolamine (C-term)	A0A024RBG1，Q9NZJ9	1746.96	17
117	ALITQAVQSE(+43.04)M(+15.99)LE(+43.04)TIPE(+43.04)E(+43.04)AGITMSPGPQ(+43.04)	E	L	ALITQAVQSEMLETIPEEAGITMSPGPQ	-	ethanolamine (DE); Oxidation (M); ethanolamine (DE); ethanolamine (DE); ethanolamine (DE); more	Q01433	3171.65	28
118	ALLGE(+43.04)D(+43.04)E(+43.04)C(+57.02)(+43.04)	P	Y	ALLGEDEC	-	ethanolamine (DE); ethanolamine (DE); ethanolamine (DE); Carbamidomethylation; ethanolamine (C-term)	P36915	1077.55	8
119	ALLLLC(+57.02)GE(+43.04)D(+43.04)D(+43.04)	K	K	ALLLLCGEDD	-	Carbamidomethylation; ethanolamine (DE); ethanolamine (DE); ethanolamine (DE)	P08758	1246.66	10
120	ALLLLC(+57.02)GE(+43.04)D(+43.04)D(+43.04)(+43.04)	K	K	ALLLLCGEDD	-	Carbamidomethylation; ethanolamine (DE); ethanolamine (DE); ethanolamine (C-term); ethanolamine (DE)	P08758	1289.7	10
121	ALLLLC(+57.02)GE(+43.04)DD(+43.04)	K	K	ALLLLCGEDD	-	Carbamidomethylation; ethanolamine (DE); ethanolamine (DE)	P08758	1203.62	10
122	ALLLLC(+57.02)GE(+43.04)DD(+43.04)(+43.04)	K	K	ALLLLCGEDD	-	Carbamidomethylation; ethanolamine (DE); ethanolamine (C-term); ethanolamine (DE)	P08758	1246.66	10
123	ALLLLC(+57.02)GEDD(+43.04)(+43.04)	K	K	ALLLLCGEDD	-	Carbamidomethylation; ethanolamine (C-term); ethanolamine (DE)	P08758	1203.62	10
124	ALLPGAPD(+43.04)PSQPLC(+57.02)(+43.04)	T	L	ALLPGAPDPSQPLC	-	ethanolamine (DE); Carbamidomethylation; ethanolamine (C-term)	Q96NU1	1520.8	14
125	ALLYLC(+57.02)GGD(+43.04)D(+43.04)	Q，Q	K，K	ALLYLCGGDD	-，-	Carbamidomethylation; ethanolamine (DE); ethanolamine (DE)	A6NMY6，P07355	1181.58	10
126	ALLYLC(+57.02)GGD(+43.04)D(+43.04)(+43.04)	Q，Q	K，K	ALLYLCGGDD	-，-	Carbamidomethylation; ethanolamine (DE); ethanolamine (C-term); ethanolamine (DE)	A6NMY6，P07355	1224.62	10
127	ALLYLC(+57.02)GGDD(+43.04)(+43.04)	Q，Q	K，K	ALLYLCGGDD	-，-	Carbamidomethylation; ethanolamine (C-term); ethanolamine (DE)	A6NMY6，P07355	1181.58	10
128	ALPVAAVNVQSTQ(+43.04)	V	E	ALPVAAVNVQSTQ	-	ethanolamine (C-term)	Q9NYY8	1339.75	13
129	ALSE(+43.04)SVLE(+43.04)STD(+43.04)	D	L	ALSESVLESTD	-	ethanolamine (DE); ethanolamine (DE); ethanolamine (DE)	O43395	1278.67	11
130	ALSE(+43.04)SVLE(+43.04)STD(+43.04)(+43.04)	D	L	ALSESVLESTD	-	ethanolamine (DE); ethanolamine (DE); ethanolamine (C-term); ethanolamine (DE)	O43395	1321.71	11
131	ALSGD(+43.04)VWD(+43.04)ID(+43.04)NE(+43.04)F(+43.04)	A	N	ALSGDVWDIDNEF	-	ethanolamine (DE); ethanolamine (DE); ethanolamine (DE); ethanolamine (DE); ethanolamine (C-term)	P02786	1694.86	13
132	ALSGD(+43.04)VWD(+43.04)IDNE(+43.04)F(+43.04)	A	N	ALSGDVWDIDNEF	-	ethanolamine (DE); ethanolamine (DE); ethanolamine (DE); ethanolamine (C-term)	P02786	1651.82	13
133	ALTVVPQGQQGLAVFTSE(+43.04)SG(+43.04)	V	E	ALTVVPQGQQGLAVFTSESG	-	ethanolamine (DE); ethanolamine (C-term)	P80217	2074.11	20
134	ALVQYLE(+43.04)E(+43.04)PLTQVAAS(+43.04)	A	Q	ALVQYLEEPLTQVAAS	-	ethanolamine (DE); ethanolamine (DE); ethanolamine (C-term)	Q9Y2Q5	1860.04	16
135	AM(+15.99)GNPSE(+43.04)FFVD(+43.04)VM(+15.99)(+43.04)	H，R	M，M	AMGNPSEFFVDVM	-，-	Oxidation (M); ethanolamine (DE); ethanolamine (DE); Oxidation (M); ethanolamine (C-term)	O14641，Q92997	1603.74	13
136	AMIVE(+43.04)AYPK(+43.04)	G	H	AMIVEAYPK	-	ethanolamine (DE); ethanolamine (C-term)	P55084	1106.62	9
137	AMLD(+43.04)TVVFK(+43.04)	L	A	AMLDTVVFK	-	ethanolamine (DE); ethanolamine (C-term)	O00487	1108.63	9
138	AMVQAPAD(+43.04)APE(+43.04)(+43.04)	Y	W	AMVQAPADAPE	-	ethanolamine (DE); ethanolamine (C-term); ethanolamine (DE)	Q03518	1227.63	11
139	ANFLLQQNFD(+43.04)E(+43.04)D(+43.04)(+43.04)	L	A	ANFLLQQNFDED	-	ethanolamine (DE); ethanolamine (DE); ethanolamine (C-term); ethanolamine (DE)	P54727	1624.82	12
140	ANLQYYA(+43.04)	K	K	ANLQYYA	-	ethanolamine (C-term)	P17980	884.439	7
141	ANLVE(+43.04)MLFSE(+43.04)D(+43.04)(+43.04)	L	Q	ANLVEMLFSED	-	ethanolamine (DE); ethanolamine (DE); ethanolamine (C-term); ethanolamine (DE)	Q9BRA2	1438.75	11
142	ANPLGMPVPAAAGAQQ(+43.04)	A	A	ANPLGMPVPAAAGAQQ	-	ethanolamine (C-term)	P68400	1534.79	16
143	ANVGWNNSTFA(+43.04)	N	A	ANVGWNNSTFA	-	ethanolamine (C-term)	P14174	1222.57	11
144	APAAAATAPTTAATTAATAAQ(+43.04)	A	A	APAAAATAPTTAATTAATAAQ	-	ethanolamine (C-term)	P37108	1841.95	21
145	APD(+43.04)VD(+43.04)D(+43.04)PE(+43.04)AFPALA(+43.04)	A	S	APDVDDPEAFPALA	-	ethanolamine (DE); ethanolamine (DE); ethanolamine (DE); ethanolamine (DE); ethanolamine (C-term)	Q8NC51	1641.87	14
146	APE(+43.04)AE(+43.04)QGGAE(+43.04)(+43.04)	S	S	APEAEQGGAE	-	ethanolamine (DE); ethanolamine (DE); ethanolamine (C-term); ethanolamine (DE)	P67809	1129.57	10
147	APPSGGASSGPTIE(+43.04)E(+43.04)VD(+43.04)(+43.04)	G	G	APPSGGASSGPTIEEVD	-	ethanolamine (DE); ethanolamine (DE); ethanolamine (C-term); ethanolamine (DE)	P11142	1741.88	17
148	APPTQQSSAE(+43.04)(+43.04)	N	P	APPTQQSSAE	-	ethanolamine (C-term); ethanolamine (DE)	P16989	1100.55	10
149	APPYGQPQPGFGYSM(+15.99)(+43.04)	Y	T	APPYGQPQPGFGYSM	-	Oxidation (M); ethanolamine (C-term)	Q00610	1654.74	15
150	APPYGQPQPGFGYSM(+43.04)	Y	T	APPYGQPQPGFGYSM	-	ethanolamine (C-term)	Q00610	1638.75	15
151	APRPPPKPM(+15.99)(+43.04)	G，G	A，A	APRPPPKPM	-，-	Oxidation (M); ethanolamine (C-term)	P62854，Q5JNZ5	1048.59	9
152	APTTAATTAATAAQ(+43.04)	A	T	APTTAATTAATAAQ	-	ethanolamine (C-term)	P37108	1288.66	14
153	AQALVQYLE(+43.04)E(+43.04)PLTQVAAS(+43.04)	A	K	AQALVQYLEEPLTQVAAS	-	ethanolamine (DE); ethanolamine (DE); ethanolamine (C-term)	Q9Y2Q5	2059.13	18
154	AQATE(+43.04)WVGATTD(+43.04)WS(+43.04)	P	T	AQATEWVGATTDWS	-	ethanolamine (DE); ethanolamine (DE); ethanolamine (C-term)	P08865	1650.8	14
155	AQC(+57.02)YQGGD(+43.04)SLVD(+43.04)	S	L	AQCYQGGDSLVD	-	Carbamidomethylation; ethanolamine (DE); ethanolamine (DE)	Q9BUK6	1397.62	12
156	AQC(+57.02)YQGGD(+43.04)SLVD(+43.04)(+43.04)	S	L	AQCYQGGDSLVD	-	Carbamidomethylation; ethanolamine (DE); ethanolamine (C-term); ethanolamine (DE)	Q9BUK6	1440.67	12
157	AQD(+43.04)QGQGAPLLE(+43.04)PAP(+43.04)	L	L	AQDQGQGAPLLEPAP	-	ethanolamine (DE); ethanolamine (DE); ethanolamine (C-term)	Q15102	1619.86	15
158	AQFLNE(+43.04)D(+43.04)LS(+43.04)	N	L	AQFLNEDLS	-	ethanolamine (DE); ethanolamine (DE); ethanolamine (C-term)	Q9BPX3	1164.61	9
159	AQFQAQLQTGSPPATTQPQGTTQPPAQPASQGSGPTA(+43.04)	Q	L	AQFQAQLQTGSPPATTQPQGTTQPPAQPASQGSGPTA	-	ethanolamine (C-term)	Q15714	3674.79	37
160	AQLNIE(+43.04)LE(+43.04)AAHH(+43.04)	K	N	AQLNIELEAAHH	-	ethanolamine (DE); ethanolamine (DE); ethanolamine (C-term)	P43490	1473.81	12
161	AQLQTGSPPATTQPQGTTQPPAQPASQGSGPTA(+43.04)	F	Q	AQLQTGSPPATTQPQGTTQPPAQPASQGSGPTA	-	ethanolamine (C-term)	Q15714	3200.57	33
162	AQLSPE(+43.04)QQAAIQE(+43.04)LLNSA(+43.04)	C	I	AQLSPEQQAAIQELLNSA	-	ethanolamine (DE); ethanolamine (DE); ethanolamine (C-term)	O00410	2039.1	18
163	AQMQMQMQGGD(+43.04)GD(+43.04)GGALGHHV(+43.04)	M	Q	AQMQMQMQGGDGDGGALGHHV	-	ethanolamine (DE); ethanolamine (DE); ethanolamine (C-term)	Q15019	2253.02	21
164	AQPE(+43.04)C(+57.02)SPE(+43.04)APPAE(+43.04)AAE(+43.04)(+43.04)	Q	E	AQPECSPEAPPAEAAE	-	ethanolamine (DE); Carbamidomethylation; ethanolamine (DE); ethanolamine (DE); ethanolamine (C-term); more	P29966	1867.91	16
165	AQPMFIQSANQPSD(+43.04)GQAPQVTGD(+43.04)(+43.04)	D	L	AQPMFIQSANQPSDGQAPQVTGD	-	ethanolamine (DE); ethanolamine (C-term); ethanolamine (DE)	Q13952	2515.21	23
166	AQPSPVTQPGASA(+43.04)	D	Q	AQPSPVTQPGASA	-	ethanolamine (C-term)	Q8TCT7	1252.64	13
167	AQSATGSVAAAPQE(+43.04)A(+43.04)	C	L	AQSATGSVAAAPQEA	-	ethanolamine (DE); ethanolamine (C-term)	O94886	1443.73	15
168	AQTD(+43.04)PE(+43.04)TND(+43.04)(+43.04)	Y	M	AQTDPETND	-	ethanolamine (DE); ethanolamine (DE); ethanolamine (C-term); ethanolamine (DE)	Q9Y3Y2	1161.56	9
169	AQTGSGGAD(+43.04)PTTD(+43.04)VSGQS(+43.04)	K	R	AQTGSGGADPTTDVSGQS	-	ethanolamine (DE); ethanolamine (DE); ethanolamine (C-term)	O75122	1763.83	18
170	AQTSPQGM(+15.99)PQHPPAPQGQ	Y	Y	AQTSPQGMPQHPPAPQGQ	-	Oxidation (M)	Q96AE4	1871.86	18
171	AQTSPQGM(+15.99)PQHPPAPQGQ(+43.04)	Y	Y	AQTSPQGMPQHPPAPQGQ	-	Oxidation (M); ethanolamine (C-term)	Q96AE4	1914.9	18
172	AQTSPQGMPQHPPAPQGQ	Y	Y	AQTSPQGMPQHPPAPQGQ	-		Q96AE4	1855.86	18
173	AQTSPQGMPQHPPAPQGQ(+43.04)	Y	Y	AQTSPQGMPQHPPAPQGQ	-	ethanolamine (C-term)	Q96AE4	1898.91	18
174	AQVE(+43.04)GGVHSLHSYE(+43.04)KRLF	S	S	AQVEGGVHSLHSYEKRLF	-	ethanolamine (DE); ethanolamine (DE)	P12268	2142.13	18
175	ASAE(+43.04)TVD(+43.04)PASLWE(+43.04)Y(+43.04)	L	K	ASAETVDPASLWEY	-	ethanolamine (DE); ethanolamine (DE); ethanolamine (DE); ethanolamine (C-term)	Q16658	1709.86	14
176	ASAPD(+43.04)VD(+43.04)D(+43.04)PE(+43.04)AFPALA(+43.04)	S	S	ASAPDVDDPEAFPALA	-	ethanolamine (DE); ethanolamine (DE); ethanolamine (DE); ethanolamine (DE); ethanolamine (C-term)	Q8NC51	1799.94	16
177	ASE(+43.04)SLFVSNHAY(+43.04)	A	A	ASESLFVSNHAY	-	ethanolamine (DE); ethanolamine (C-term)	P04075	1409.69	12
178	ASFIE(+43.04)QVAVSM(+15.99)T(+43.04)	N	L	ASFIEQVAVSMT	-	ethanolamine (DE); Oxidation (M); ethanolamine (C-term)	P61457	1383.71	12
179	ASHPNYPYSD(+43.04)E(+43.04)Y(+43.04)	S	F	ASHPNYPYSDEY	-	ethanolamine (DE); ethanolamine (DE); ethanolamine (C-term)	P42330	1570.71	12
180	ASKE(+43.04)KE(+43.04)E(+43.04)VAE(+43.04)E(+43.04)AQSGGD(+43.04)	G	E	ASKEKEEVAEEAQSGGD	-	ethanolamine (DE); ethanolamine (DE); ethanolamine (DE); ethanolamine (DE); ethanolamine (DE); more	O76070	2021.04	17
181	ASKE(+43.04)KE(+43.04)E(+43.04)VAE(+43.04)E(+43.04)AQSGGD(+43.04)(+43.04)	G	E	ASKEKEEVAEEAQSGGD	-	ethanolamine (DE); ethanolamine (DE); ethanolamine (DE); ethanolamine (DE); ethanolamine (DE); more	O76070	2064.08	17
182	ASKEKE(+43.04)E(+43.04)VAE(+43.04)E(+43.04)AQSGGD(+43.04)(+43.04)	G	E	ASKEKEEVAEEAQSGGD	-	ethanolamine (DE); ethanolamine (DE); ethanolamine (DE); ethanolamine (DE); ethanolamine (C-term); more	O76070	2021.04	17
183	ASLFPLPGLPD(+43.04)F(+43.04)	S	F	ASLFPLPGLPDF	-	ethanolamine (DE); ethanolamine (C-term)	P34896	1358.76	12
184	ASSAC(+57.02)AAPSQE(+43.04)AQPE(+43.04)C(+57.02)SPE(+43.04)APPAE(+43.04)AAE(+43.04)(+43.04)	A	A	ASSACAAPSQEAQPECSPEAPPAEAAE	-	Carbamidomethylation; ethanolamine (DE); ethanolamine (DE); Carbamidomethylation; ethanolamine (DE); more	P29966	2970.38	27
185	ASSGPTIE(+43.04)E(+43.04)VD(+43.04)	G	G	ASSGPTIEEVD	-	ethanolamine (DE); ethanolamine (DE); ethanolamine (DE)	P11142	1232.62	11
186	ASSGPTIE(+43.04)E(+43.04)VD(+43.04)(+43.04)	G	G	ASSGPTIEEVD	-	ethanolamine (DE); ethanolamine (DE); ethanolamine (C-term); ethanolamine (DE)	P11142	1275.67	11
187	ASYD(+43.04)VSD(+43.04)SGQLE(+43.04)HVQPWSV(+43.04)	Y	K	ASYDVSDSGQLEHVQPWSV	-	ethanolamine (DE); ethanolamine (DE); ethanolamine (DE); ethanolamine (C-term)	Q01813	2275.12	19
188	ATAPPHVTVVR(+43.04)	D	L	ATAPPHVTVVR	-	ethanolamine (C-term)	Q8N1G4	1189.69	11
189	ATAPTTAATTAATAAQ(+43.04)	A	A	ATAPTTAATTAATAAQ	-	ethanolamine (C-term)	P37108	1460.75	16
190	ATE(+43.04)SPSD(+43.04)SPE(+43.04)D(+43.04)GPGLSPLL(+43.04)	G	M	ATESPSDSPEDGPGLSPLL	-	ethanolamine (DE); ethanolamine (DE); ethanolamine (DE); ethanolamine (DE); ethanolamine (C-term)	O75648	2083.08	19
191	ATE(+43.04)WVGATTD(+43.04)WS(+43.04)	A	Q	ATEWVGATTDWS	-	ethanolamine (DE); ethanolamine (DE); ethanolamine (C-term)	P08865	1451.7	12
192	ATGGFLQGD(+43.04)E(+43.04)AD(+43.04)C(+57.02)Y(+43.04)	M	L	ATGGFLQGDEADCY	-	ethanolamine (DE); ethanolamine (DE); ethanolamine (DE); Carbamidomethylation; ethanolamine (C-term)	Q6PJG6	1674.77	14
193	ATQGPAATPYHC(+57.02)(+43.04)	P	H	ATQGPAATPYHC	-	Carbamidomethylation; ethanolamine (C-term)	Q9BYD3	1315.6	12
194	ATSGE(+43.04)TLE(+43.04)E(+43.04)NE(+43.04)AGD(+43.04)	E	N	ATSGETLEENEAGD	-	ethanolamine (DE); ethanolamine (DE); ethanolamine (DE); ethanolamine (DE); ethanolamine (DE)	Q9UQ80	1636.79	14
195	ATSGE(+43.04)TLE(+43.04)E(+43.04)NE(+43.04)AGD(+43.04)(+43.04)	E	N	ATSGETLEENEAGD	-	ethanolamine (DE); ethanolamine (DE); ethanolamine (DE); ethanolamine (DE); ethanolamine (C-term); more	Q9UQ80	1679.83	14
196	ATTD(+43.04)TLE(+43.04)STTVGTSV(+43.04)	N	V	ATTDTLESTTVGTSV	-	ethanolamine (DE); ethanolamine (DE); ethanolamine (C-term)	Q15046	1610.84	15
197	ATYSGLE(+43.04)SQSVSGC(+57.02)YGAGYSGQNSM(+15.99)GGYD(+43.04)(+43.04)	A	Q	ATYSGLESQSVSGCYGAGYSGQNSMGGYD	-	ethanolamine (DE); Carbamidomethylation; Oxidation (M); ethanolamine (C-term); ethanolamine (DE)	P52597	3097.3	29
198	ATYSGLE(+43.04)SQSVSGC(+57.02)YGAGYSGQNSMGGYD(+43.04)(+43.04)	A	Q	ATYSGLESQSVSGCYGAGYSGQNSMGGYD	-	ethanolamine (DE); Carbamidomethylation; ethanolamine (C-term); ethanolamine (DE)	P52597	3081.31	29
199	AVAAPPTAVGSLSGAE(+43.04)GVPVSSQPLPSQPW(+43.04)	A	A	AVAAPPTAVGSLSGAEGVPVSSQPLPSQPW	-	ethanolamine (DE); ethanolamine (C-term)	P56270	2942.55	30
200	AVAIQGPLTTASL(+43.04)	I	E	AVAIQGPLTTASL	-	ethanolamine (C-term)	P52758	1283.74	13
201	AVAPAHVPAPSPQGPGGLQGAST(+43.04)	G	E	AVAPAHVPAPSPQGPGGLQGAST	-	ethanolamine (C-term)	P33897	2109.1	23
202	AVAQD(+43.04)PAASGAPSS(+43.04)	A	A	AVAQDPAASGAPSS	-	ethanolamine (DE); ethanolamine (C-term)	Q8TAE8	1313.66	14
203	AVC(+57.02)FD(+43.04)SSGSQGALPGLTNQ(+43.04)	I	L	AVCFDSSGSQGALPGLTNQ	-	Carbamidomethylation; ethanolamine (DE); ethanolamine (C-term)	Q6AI08	1993.95	19
204	AVD(+43.04)E(+43.04)FAFLE(+43.04)GTLD(+43.04)	I	E	AVDEFAFLEGTLD	-	ethanolamine (DE); ethanolamine (DE); ethanolamine (DE); ethanolamine (DE)	Q9NR33	1597.84	13
205	AVD(+43.04)E(+43.04)FAFLE(+43.04)GTLD(+43.04)(+43.04)	I	E	AVDEFAFLEGTLD	-	ethanolamine (DE); ethanolamine (DE); ethanolamine (DE); ethanolamine (C-term); ethanolamine (DE)	Q9NR33	1640.88	13
206	AVD(+43.04)E(+43.04)FAFLEGTLD(+43.04)(+43.04)	I	E	AVDEFAFLEGTLD	-	ethanolamine (DE); ethanolamine (DE); ethanolamine (C-term); ethanolamine (DE)	Q9NR33	1597.84	13
207	AVD(+43.04)VLQTLE(+43.04)HVD(+43.04)LD(+43.04)PQE(+43.04)PPR(+43.04)	Y	S	AVDVLQTLEHVDLDPQEPPR	-	ethanolamine (DE); ethanolamine (DE); ethanolamine (DE); ethanolamine (DE); ethanolamine (DE); more	Q8IVS2	2528.41	20
208	AVGGTVVLE(+43.04)(+43.04)	L	E	AVGGTVVLE	-	ethanolamine (C-term); ethanolamine (DE)	P52815	929.555	9
209	AVGIGTTQVQPE(+43.04)(+43.04)	A	S	AVGIGTTQVQPE	-	ethanolamine (C-term); ethanolamine (DE)	Q16891	1284.7	12
210	AVGPAD(+43.04)IPC(+57.02)D(+43.04)STGQTST(+43.04)	D	Q	AVGPADIPCDSTGQTST	-	ethanolamine (DE); Carbamidomethylation; ethanolamine (DE); ethanolamine (C-term)	Q9H773	1804.86	17
211	AVGPAD(+43.04)IPC(+57.02)DSTGQTST(+43.04)	D	Q	AVGPADIPCDSTGQTST	-	ethanolamine (DE); Carbamidomethylation; ethanolamine (C-term)	Q9H773	1761.82	17
212	AVISLE(+43.04)GKPL(+43.04)	G	S	AVISLEGKPL	-	ethanolamine (DE); ethanolamine (C-term)	P23528	1111.7	10
213	AVLAPD(+43.04)SSNASSE(+43.04)PSS(+43.04)	T	A	AVLAPDSSNASSEPSS	-	ethanolamine (DE); ethanolamine (DE); ethanolamine (C-term)	Q99611	1646.81	16
214	AVLAPPE(+43.04)PAQ(+43.04)	A	E	AVLAPPEPAQ	-	ethanolamine (DE); ethanolamine (C-term)	Q8WZA9	1077.62	10
215	AVNSATGVPTV(+43.04)	Q，Q	K，K	AVNSATGVPTV	-，-	ethanolamine (C-term)	P11940，Q9H361	1057.58	11
216	AVPGVAAE(+43.04)QPGVSPSGS(+43.04)	A	S	AVPGVAAEQPGVSPSGS	-	ethanolamine (DE); ethanolamine (C-term)	Q9Y5J6	1594.83	17
217	AVSPVD(+43.04)LNLPLD(+43.04)(+43.04)	I	L	AVSPVDLNLPLD	-	ethanolamine (DE); ethanolamine (C-term); ethanolamine (DE)	Q9HB09	1380.8	12
218	AVTE(+43.04)GAQAVE(+43.04)E(+43.04)PSIC(+57.02)(+43.04)	V	K	AVTEGAQAVEEPSIC	-	ethanolamine (DE); ethanolamine (DE); ethanolamine (DE); Carbamidomethylation; ethanolamine (C-term)	P28331	1731.88	15
219	AVVQSPQVTE(+43.04)VL(+43.04)	K	K	AVVQSPQVTEVL	-	ethanolamine (DE); ethanolamine (C-term)	Q3KQU3	1354.78	12
220	AYANTLLQLGM(+15.99)M(+15.99)(+43.04)	P	M	AYANTLLQLGMM	-	Oxidation (M); Oxidation (M); ethanolamine (C-term)	P53041	1399.68	12
221	AYANTLLQLGM(+15.99)M(+43.04)	P	M	AYANTLLQLGMM	-	Oxidation (M); ethanolamine (C-term)	P53041	1383.69	12
222	AYANTLLQLGMM(+15.99)(+43.04)	P	M	AYANTLLQLGMM	-	Oxidation (M); ethanolamine (C-term)	P53041	1383.69	12
223	AYANTLLQLGMM(+43.04)	P	M	AYANTLLQLGMM	-	ethanolamine (C-term)	P53041	1367.69	12
224	AYASAVGIGTTQVQPE(+43.04)(+43.04)	L	T	AYASAVGIGTTQVQPE	-	ethanolamine (C-term); ethanolamine (DE)	Q16891	1676.87	16
225	AYASGC(+57.02)TISPY(+43.04)	H	H	AYASGCTISPY	-	Carbamidomethylation; ethanolamine (C-term)	P28300	1231.55	11
226	AYE(+43.04)MPSE(+43.04)E(+43.04)GYQDYE(+43.04)PE(+43.04)A(+43.04)	N	E	AYEMPSEEGYQDYEPEA	-	ethanolamine (DE); ethanolamine (DE); ethanolamine (DE); ethanolamine (DE); ethanolamine (DE); more	P37840	2265.03	17
227	AYM(+15.99)AQTD(+43.04)PE(+43.04)TND(+43.04)(+43.04)	L	D	AYMAQTDPETND	-	Oxidation (M); ethanolamine (DE); ethanolamine (DE); ethanolamine (C-term); ethanolamine (DE)	Q9Y3Y2	1542.7	12
228	AYMAQTD(+43.04)PE(+43.04)TND(+43.04)(+43.04)	L	D	AYMAQTDPETND	-	ethanolamine (DE); ethanolamine (DE); ethanolamine (C-term); ethanolamine (DE)	Q9Y3Y2	1526.7	12
229	AYPATAAAPM(+15.99)IGYPM(+15.99)PTGYSQ(+43.04)	A	Y	AYPATAAAPMIGYPMPTGYSQ	-	Oxidation (M); Oxidation (M); ethanolamine (C-term)	P17844	2232.02	21
230	AYPATAAAPM(+15.99)IGYPMPTGYSQ(+43.04)	A	Y	AYPATAAAPMIGYPMPTGYSQ	-	Oxidation (M); ethanolamine (C-term)	P17844	2216.03	21
231	AYPATAAAPMIGYPM(+15.99)PTGYSQ(+43.04)	A	Y	AYPATAAAPMIGYPMPTGYSQ	-	Oxidation (M); ethanolamine (C-term)	P17844	2216.03	21
232	AYPATAAAPMIGYPMPTGYSQ(+43.04)	A	Y	AYPATAAAPMIGYPMPTGYSQ	-	ethanolamine (C-term)	P17844	2200.03	21
233	AYYAQTSPQGM(+15.99)PQHPPAPQGQ(+43.04)	Q	A	AYYAQTSPQGMPQHPPAPQGQ	-	Oxidation (M); ethanolamine (C-term)	Q96AE4	2312.06	21
234	AYYAQTSPQGMPQHPPAPQGQ(+43.04)	Q	A	AYYAQTSPQGMPQHPPAPQGQ	-	ethanolamine (C-term)	Q96AE4	2296.07	21
235	AYYGQTPGPGGPQPPPTQQGQQQAQ(+43.04)	Q	A	AYYGQTPGPGGPQPPPTQQGQQQAQ	-	ethanolamine (C-term)	Q92945	2623.24	25
236	D(+43.04)APAAGE(+43.04)D(+43.04)A(+43.04)	G	G	DAPAAGEDA	-	ethanolamine (DE); ethanolamine (DE); ethanolamine (DE); ethanolamine (C-term)	P62851	987.499	9
237	D(+43.04)ASSPTISPASSP	R	S	DASSPTISPASSP	-	ethanolamine (DE)	Q9Y2Y9	1258.6	13
238	D(+43.04)AYM(+15.99)AQTD(+43.04)PE(+43.04)TND(+43.04)(+43.04)	E	L	DAYMAQTDPETND	-	ethanolamine (DE); Oxidation (M); ethanolamine (DE); ethanolamine (DE); ethanolamine (C-term); more	Q9Y3Y2	1700.77	13
239	D(+43.04)AYMAQTD(+43.04)PE(+43.04)TND(+43.04)(+43.04)	E	L	DAYMAQTDPETND	-	ethanolamine (DE); ethanolamine (DE); ethanolamine (DE); ethanolamine (C-term); ethanolamine (DE)	Q9Y3Y2	1684.77	13
240	D(+43.04)D(+43.04)MGFGLFD(+43.04)(+43.04)	S，S	D，D	DDMGFGLFD	-，-	ethanolamine (DE); ethanolamine (DE); ethanolamine (C-term); ethanolamine (DE)	P05386，P05387	1187.56	9
241	D(+43.04)E(+43.04)E(+43.04)E(+43.04)D(+43.04)THL(+43.04)	D	L	DEEEDTHL	-	ethanolamine (DE); ethanolamine (DE); ethanolamine (DE); ethanolamine (DE); ethanolamine (DE); more	O00592	1244.64	8
242	D(+43.04)E(+43.04)E(+43.04)E(+43.04)SE(+43.04)AQGPK(+43.04)	E	D	DEEESEAQGPK	-	ethanolamine (DE); ethanolamine (DE); ethanolamine (DE); ethanolamine (DE); ethanolamine (DE); more	Q13509	1475.76	11
243	D(+43.04)E(+43.04)SVLGVSMF(+43.04)	I	M	DESVLGVSMF	-	ethanolamine (DE); ethanolamine (DE); ethanolamine (C-term)	Q8N3U4	1211.62	10
244	D(+43.04)ED(+43.04)LFHKLTGGQD(+43.04)	T	L	DEDLFHKLTGGQD	-	ethanolamine (DE); ethanolamine (DE); ethanolamine (DE)	Q9BQL6	1602.8	13
245	D(+43.04)FE(+43.04)PYD(+43.04)FTLD(+43.04)D(+43.04)(+43.04)	R	K	DFEPYDFTLDD	-	ethanolamine (DE); ethanolamine (DE); ethanolamine (DE); ethanolamine (DE); ethanolamine (C-term); more	Q69YN2	1633.8	11
246	D(+43.04)FPRPLPHATQGPAATPYHC(+57.02)(+43.04)	Y	S	DFPRPLPHATQGPAATPYHC	-	ethanolamine (DE); Carbamidomethylation; ethanolamine (C-term)	Q9BYD3	2318.14	20
247	D(+43.04)GIYVSEKGTVQQAD(+43.04)E(+43.04)(+43.04)	F	L	DGIYVSEKGTVQQADE	-	ethanolamine (DE); ethanolamine (DE); ethanolamine (C-term); ethanolamine (DE)	P32969	1909.97	16
248	D(+43.04)GQVINE(+43.04)TSQHHD(+43.04)D(+43.04)LE(+43.04)(+43.04)	T	R	DGQVINETSQHHDDLE	-	ethanolamine (DE); ethanolamine (DE); ethanolamine (DE); ethanolamine (DE); ethanolamine (C-term); more	P08670	2094.05	16
249	D(+43.04)GVLVD(+43.04)E(+43.04)FGLPQIPAS(+43.04)	N	K	DGVLVDEFGLPQIPAS	-	ethanolamine (DE); ethanolamine (DE); ethanolamine (DE); ethanolamine (C-term)	Q9NZZ3	1828.01	16
250	D(+43.04)IAHM(+15.99)ISGFE(+43.04)(+43.04)	N	W	DIAHMISGFE	-	ethanolamine (DE); Oxidation (M); ethanolamine (C-term); ethanolamine (DE)	P28070	1263.63	10
251	D(+43.04)IAHMISGFE(+43.04)(+43.04)	N	W	DIAHMISGFE	-	ethanolamine (DE); ethanolamine (C-term); ethanolamine (DE)	P28070	1247.63	10
252	D(+43.04)IE(+43.04)D(+43.04)PE(+43.04)IVVQATVL(+43.04)	K	R	DIEDPEIVVQATVL	-	ethanolamine (DE); ethanolamine (DE); ethanolamine (DE); ethanolamine (DE); ethanolamine (C-term)	O00764	1755.01	14
253	D(+43.04)IE(+43.04)PD(+43.04)IE(+43.04)ALLSQGPSC(+57.02)A(+43.04)	T	I	DIEPDIEALLSQGPSCA	-	ethanolamine (DE); ethanolamine (DE); ethanolamine (DE); ethanolamine (DE); Carbamidomethylation; more	P07203	2029.05	17
254	D(+43.04)IFAGPPNYPFSD(+43.04)E(+43.04)Y(+43.04)	T，T	L，L	DIFAGPPNYPFSDEY	-，-	ethanolamine (DE); ethanolamine (DE); ethanolamine (DE); ethanolamine (C-term)	P52895，Q04828	1902.92	15
255	D(+43.04)IFAGPPNYPFSD(+43.04)EY(+43.04)	T，T	L，L	DIFAGPPNYPFSDEY	-，-	ethanolamine (DE); ethanolamine (DE); ethanolamine (C-term)	P52895，Q04828	1859.87	15
256	D(+43.04)IFAGPPNYPFSDE(+43.04)Y(+43.04)	T，T	L，L	DIFAGPPNYPFSDEY	-，-	ethanolamine (DE); ethanolamine (DE); ethanolamine (C-term)	P52895，Q04828	1859.87	15
257	D(+43.04)IID(+43.04)D(+43.04)INSGAVE(+43.04)C(+57.02)PAS(+43.04)	P	H	DIIDDINSGAVECPAS	-	ethanolamine (DE); ethanolamine (DE); ethanolamine (DE); ethanolamine (DE); Carbamidomethylation; more	P30050	1889.95	16
258	D(+43.04)IIDD(+43.04)INSGAVE(+43.04)C(+57.02)PAS(+43.04)	P	H	DIIDDINSGAVECPAS	-	ethanolamine (DE); ethanolamine (DE); ethanolamine (DE); Carbamidomethylation; ethanolamine (C-term)	P30050	1846.91	16
259	D(+43.04)INSGAVE(+43.04)C(+57.02)PAS(+43.04)	I	D	DINSGAVECPAS	-	ethanolamine (DE); ethanolamine (DE); Carbamidomethylation; ethanolamine (C-term)	P30050	1347.65	12
260	D(+43.04)KVSHVSTGGGASLE(+43.04)LLE(+43.04)GKVLPGVD(+43.04)ALSNI(+43.04)	T	E	DKVSHVSTGGGASLELLEGKVLPGVDALSNI	-	ethanolamine (DE); ethanolamine (DE); ethanolamine (DE); ethanolamine (DE); ethanolamine (C-term)	P00558	3276.84	31
261	D(+43.04)KYTE(+43.04)VLKTHGLLV(+43.04)	K	I	DKYTEVLKTHGLLV	-	ethanolamine (DE); ethanolamine (DE); ethanolamine (C-term)	P40429	1744.02	14
262	D(+43.04)LLGVPRPQLVPQPGAC(+57.02)(+43.04)	L	C	DLLGVPRPQLVPQPGAC	-	ethanolamine (DE); Carbamidomethylation; ethanolamine (C-term)	Q9BTW9	1902.05	17
263	D(+43.04)LQVYAAE(+43.04)SPPS(+43.04)	N	L	DLQVYAAESPPS	-	ethanolamine (DE); ethanolamine (DE); ethanolamine (C-term)	Q49AR2	1404.72	12
264	D(+43.04)M(+15.99)NAANVGWNNSTFA(+43.04)	Y	Y	DMNAANVGWNNSTFA	-	ethanolamine (DE); Oxidation (M); ethanolamine (C-term)	P14174	1712.76	15
265	D(+43.04)MNAANVGWNNSTFA(+43.04)	Y	Y	DMNAANVGWNNSTFA	-	ethanolamine (DE); ethanolamine (C-term)	P14174	1696.76	15
266	D(+43.04)PE(+43.04)AFPALA(+43.04)	V	D	DPEAFPALA	-	ethanolamine (DE); ethanolamine (DE); ethanolamine (C-term)	Q8NC51	1058.58	9
267	D(+43.04)PPAE(+43.04)NSSAPE(+43.04)AE(+43.04)QGGAE(+43.04)(+43.04)	A	A	DPPAENSSAPEAEQGGAE	-	ethanolamine (DE); ethanolamine (DE); ethanolamine (DE); ethanolamine (DE); ethanolamine (C-term); more	P67809	2012.98	18
268	D(+43.04)QTLNE(+43.04)LNC(+57.02)I(+43.04)	T	L	DQTLNELNCI	-	ethanolamine (DE); ethanolamine (DE); Carbamidomethylation; ethanolamine (C-term)	P67936	1347.68	10
269	D(+43.04)QVLQE(+43.04)NSSD(+43.04)FQSNIA(+43.04)	G	Y	DQVLQENSSDFQSNIA	-	ethanolamine (DE); ethanolamine (DE); ethanolamine (DE); ethanolamine (C-term)	P31943	1965.98	16
270	D(+43.04)QVLQE(+43.04)NSSD(+43.04)YQSNLA(+43.04)	G	Y	DQVLQENSSDYQSNLA	-	ethanolamine (DE); ethanolamine (DE); ethanolamine (DE); ethanolamine (C-term)	P55795	1981.97	16
271	D(+43.04)RC(+57.02)TLAE(+43.04)KLGGSAVISLE(+43.04)GKPL(+43.04)	V	K	DRCTLAEKLGGSAVISLEGKPL	-	ethanolamine (DE); Carbamidomethylation; ethanolamine (DE); ethanolamine (DE); ethanolamine (C-term)	P23528	2485.41	22
272	D(+43.04)SSGATSPINPAVALE(+43.04)(+43.04)	G	N	DSSGATSPINPAVALE	-	ethanolamine (DE); ethanolamine (C-term); ethanolamine (DE)	P32004	1656.87	16
273	D(+43.04)TTPTVAGQFE(+43.04)D(+43.04)AD(+43.04)VD(+43.04)H(+43.04)	E	V	DTTPTVAGQFEDADVDH	-	ethanolamine (DE); ethanolamine (DE); ethanolamine (DE); ethanolamine (DE); ethanolamine (DE); more	P54105	2075.03	17
274	D(+43.04)TYGQQWK(+43.04)	Y	Q	DTYGQQWK	-	ethanolamine (DE); ethanolamine (C-term)	O43390	1110.55	8
275	D(+43.04)VGLIAIR(+43.04)	L	M	DVGLIAIR	-	ethanolamine (DE); ethanolamine (C-term)	P31948	941.602	8
276	D(+43.04)VSD(+43.04)SGQLE(+43.04)HVQPWSV(+43.04)	S	Y	DVSDSGQLEHVQPWSV	-	ethanolamine (DE); ethanolamine (DE); ethanolamine (DE); ethanolamine (C-term)	Q01813	1953.99	16
277	D(+43.04)WID(+43.04)AC(+57.02)E(+43.04)AANQ(+43.04)	Y	S	DWIDACEAANQ	-	ethanolamine (DE); ethanolamine (DE); Carbamidomethylation; ethanolamine (DE); ethanolamine (C-term)	P60002	1463.68	11
278	D(+43.04)Y(+155.14)QYSD(+43.04)QGID(+43.04)Y(+43.04)	P	R	DYQYSDQGIDY	-	ethanolamine (DE); EDC(Y); ethanolamine (DE); ethanolamine (DE); ethanolamine (C-term)	Q15417	1692.85	11
279	D(+43.04)YGGYD(+43.04)GGYVQD(+43.04)YE(+43.04)D(+43.04)FM(+15.99)(+43.04)	L	A	DYGGYDGGYVQDYEDFM	-	ethanolamine (DE); ethanolamine (DE); ethanolamine (DE); ethanolamine (DE); ethanolamine (DE); more	O75822	2266.98	17
280	D(+43.04)YGSYSGNTQGGTSTQ(+43.04)	N	Y	DYGSYSGNTQGGTSTQ	-	ethanolamine (DE); ethanolamine (C-term)	Q9BUJ2	1707.73	16
281	D(+43.04)YISWGTQE(+43.04)Q(+43.04)	R，Q	P，P	DYISWGTQEQ	-，-	ethanolamine (DE); ethanolamine (DE); ethanolamine (C-term)	P23258，Q9NRH3	1354.65	10
282	D(+43.04)YQYSD(+43.04)QGID(+43.04)Y(+43.04)	P	R	DYQYSDQGIDY	-	ethanolamine (DE); ethanolamine (DE); ethanolamine (DE); ethanolamine (C-term)	Q15417	1537.7	11
283	D(+43.04)YTSC(+57.02)AQNWIYE(+43.04)(+43.04)	L	V	DYTSCAQNWIYE	-	ethanolamine (DE); Carbamidomethylation; ethanolamine (C-term); ethanolamine (DE)	P15531	1677.75	12
284	DD(+43.04)M(+15.99)GFGLFD(+43.04)(+43.04)	S，S	D，D	DDMGFGLFD	-，-	ethanolamine (DE); Oxidation (M); ethanolamine (C-term); ethanolamine (DE)	P05386，P05387	1160.52	9
285	DGQVINE(+43.04)TSQHHD(+43.04)D(+43.04)LE(+43.04)(+43.04)	T	R	DGQVINETSQHHDDLE	-	ethanolamine (DE); ethanolamine (DE); ethanolamine (DE); ethanolamine (C-term); ethanolamine (DE)	P08670	2051	16
286	DKSSASAPD(+43.04)VD(+43.04)D(+43.04)PE(+43.04)AFPALA(+43.04)	R	T	DKSSASAPDVDDPEAFPALA	-	ethanolamine (DE); ethanolamine (DE); ethanolamine (DE); ethanolamine (DE); ethanolamine (C-term)	Q8NC51	2217.13	20
287	DNLTLWTSDTQGDEAEAGEGGEN	L	R	DNLTLWTSDTQGDEAEAGEGGEN	-		P63104	2407.99	23
288	DYEEVGVDSVEGEGEEEGEEY	E，E	K，K	DYEEVGVDSVEGEGEEEGEEY	-，-		Q71U36，P68363	2347.9	21
289	E(+43.04)AE(+43.04)AE(+43.04)PE(+43.04)PE(+43.04)LA(+43.04)	G	D	EAEAEPEPELA	-	ethanolamine (DE); ethanolamine (DE); ethanolamine (DE); ethanolamine (DE); ethanolamine (DE); more	Q92791	1441.78	11
290	E(+43.04)ALQD(+43.04)VE(+43.04)D(+43.04)E(+43.04)NQ(+43.04)	N	K	EALQDVEDENQ	-	ethanolamine (DE); ethanolamine (DE); ethanolamine (DE); ethanolamine (DE); ethanolamine (DE); more	P62258	1546.8	11
291	E(+43.04)AQPE(+43.04)C(+57.02)SPE(+43.04)APPAE(+43.04)AAE(+43.04)(+43.04)	S	Q	EAQPECSPEAPPAEAAE	-	ethanolamine (DE); ethanolamine (DE); Carbamidomethylation; ethanolamine (DE); ethanolamine (DE); more	P29966	2039.99	17
292	E(+43.04)AQTLD(+43.04)SQIQE(+43.04)TSI(+43.04)	Q	R	EAQTLDSQIQETSI	-	ethanolamine (DE); ethanolamine (DE); ethanolamine (DE); ethanolamine (C-term)	P27816	1733.92	14
293	E(+43.04)ATE(+43.04)VTD(+43.04)E(+43.04)PME(+43.04)QD(+43.04)(+43.04)	D	D	EATEVTDEPMEQD	-	ethanolamine (DE); ethanolamine (DE); ethanolamine (DE); ethanolamine (DE); ethanolamine (DE); more	Q9NY27	1793.88	13
294	E(+43.04)E(+43.04)E(+43.04)E(+43.04)SME(+43.04)TQE(+43.04)(+43.04)	Q	G	EEEESMETQE	-	ethanolamine (DE); ethanolamine (DE); ethanolamine (DE); ethanolamine (DE); ethanolamine (DE); more	Q12905	1540.74	10
295	E(+43.04)E(+43.04)VAE(+43.04)E(+43.04)AQSGGD(+43.04)(+43.04)	E	K	EEVAEEAQSGGD	-	ethanolamine (DE); ethanolamine (DE); ethanolamine (DE); ethanolamine (DE); ethanolamine (C-term); more	O76070	1477.74	12
296	E(+43.04)GGPQE(+43.04)E(+43.04)QE(+43.04)E(+43.04)Y(+43.04)	P	D	EGGPQEEQEEY	-	ethanolamine (DE); ethanolamine (DE); ethanolamine (DE); ethanolamine (DE); ethanolamine (DE); more	Q15691	1551.75	11
297	E(+43.04)ID(+43.04)ISSYIE(+43.04)QTR(+43.04)	P	D	EIDISSYIEQTR	-	ethanolamine (DE); ethanolamine (DE); ethanolamine (DE); ethanolamine (C-term)	Q13838	1624.88	12
298	E(+43.04)ILQWVLQTD(+43.04)SQQ(+43.04)	R	H	EILQWVLQTDSQQ	-	ethanolamine (DE); ethanolamine (DE); ethanolamine (C-term)	Q96AG4	1715.92	13
299	E(+43.04)IVTNFLAGFE(+43.04)A(+43.04)	L	K	EIVTNFLAGFEA	-	ethanolamine (DE); ethanolamine (DE); ethanolamine (C-term)	P25705	1438.78	12
300	E(+43.04)LIE(+43.04)IISGAAALD(+43.04)(+43.04)	T	K	ELIEIISGAAALD	-	ethanolamine (DE); ethanolamine (DE); ethanolamine (C-term); ethanolamine (DE)	P36542	1485.88	13
301	E(+43.04)LYLQNSPE(+43.04)AC(+57.02)D(+43.04)YGL(+43.04)	F	L	ELYLQNSPEACDYGL	-	ethanolamine (DE); ethanolamine (DE); Carbamidomethylation; ethanolamine (DE); ethanolamine (C-term)	P78417	1942.95	15
302	E(+43.04)NE(+43.04)GE(+43.04)D(+43.04)YAE(+43.04)(+43.04)	E	D	ENEGEDYAE	-	ethanolamine (DE); ethanolamine (DE); ethanolamine (DE); ethanolamine (DE); ethanolamine (C-term); more	P23588	1312.63	9
303	E(+43.04)NLAANFLLQQNFD(+43.04)E(+43.04)D(+43.04)(+43.04)	K	N	ENLAANFLLQQNFDED	-	ethanolamine (DE); ethanolamine (DE); ethanolamine (DE); ethanolamine (C-term); ethanolamine (DE)	P54727	2095.07	16
304	E(+43.04)NSSAPE(+43.04)AE(+43.04)QGGAE(+43.04)(+43.04)	P	A	ENSSAPEAEQGGAE	-	ethanolamine (DE); ethanolamine (DE); ethanolamine (DE); ethanolamine (C-term); ethanolamine (DE)	P67809	1589.76	14
305	E(+43.04)PE(+43.04)LLE(+43.04)PIPYE(+43.04)FMA(+43.04)	G	K	EPELLEPIPYEFMA	-	ethanolamine (DE); ethanolamine (DE); ethanolamine (DE); ethanolamine (DE); ethanolamine (C-term)	P46778	1892.01	14
306	E(+43.04)PIPYE(+43.04)FMA(+43.04)	L	L	EPIPYEFMA	-	ethanolamine (DE); ethanolamine (DE); ethanolamine (C-term)	P46778	1224.62	9
307	E(+43.04)PPAM(+15.99)PQPVPTA(+43.04)	K	P	EPPAMPQPVPTA	-	ethanolamine (DE); Oxidation (M); ethanolamine (C-term)	P23396	1335.69	12
308	E(+43.04)PPAMPQPVPTA(+43.04)	K	P	EPPAMPQPVPTA	-	ethanolamine (DE); ethanolamine (C-term)	P23396	1319.69	12
309	E(+43.04)QAQGGD(+43.04)GPE(+43.04)E(+43.04)Q(+43.04)	P	Y	EQAQGGDGPEEQ	-	ethanolamine (DE); ethanolamine (DE); ethanolamine (DE); ethanolamine (DE); ethanolamine (C-term)	Q9H1C4	1458.71	12
310	E(+43.04)QAQGGDGPE(+43.04)E(+43.04)Q(+43.04)	P	Y	EQAQGGDGPEEQ	-	ethanolamine (DE); ethanolamine (DE); ethanolamine (DE); ethanolamine (C-term)	Q9H1C4	1415.66	12
311	E(+43.04)SPE(+43.04)SE(+43.04)GPIYE(+43.04)GLIL(+43.04)	R	R	ESPESEGPIYEGLIL	-	ethanolamine (DE); ethanolamine (DE); ethanolamine (DE); ethanolamine (DE); ethanolamine (C-term)	Q96QK1	1847	15
312	E(+43.04)TSQHHD(+43.04)D(+43.04)LE(+43.04)(+43.04)	I	N	ETSQHHDDLE	-	ethanolamine (DE); ethanolamine (DE); ethanolamine (DE); ethanolamine (C-term); ethanolamine (DE)	P08670	1424.7	10
313	E(+43.04)VAE(+43.04)E(+43.04)AQSGGD(+43.04)(+43.04)	K	E	EVAEEAQSGGD	-	ethanolamine (DE); ethanolamine (DE); ethanolamine (DE); ethanolamine (C-term); ethanolamine (DE)	O76070	1305.65	11
314	E(+43.04)VAQTTALPD(+43.04)E(+43.04)D(+43.04)D(+43.04)D(+43.04)L	D	L	EVAQTTALPDEDDDL	-	ethanolamine (DE); ethanolamine (DE); ethanolamine (DE); ethanolamine (DE); ethanolamine (DE); more	P62826	1888.97	15
315	E(+43.04)VAQTTALPD(+43.04)E(+43.04)D(+43.04)D(+43.04)DL(+43.04)	D	L	EVAQTTALPDEDDDL	-	ethanolamine (DE); ethanolamine (DE); ethanolamine (DE); ethanolamine (DE); ethanolamine (DE); more	P62826	1888.97	15
316	E(+43.04)VAQTTALPD(+43.04)E(+43.04)D(+43.04)DD(+43.04)L(+43.04)	D	L	EVAQTTALPDEDDDL	-	ethanolamine (DE); ethanolamine (DE); ethanolamine (DE); ethanolamine (DE); ethanolamine (DE); more	P62826	1888.97	15
317	E(+43.04)VAQTTALPD(+43.04)E(+43.04)DD(+43.04)D(+43.04)L(+43.04)	D	L	EVAQTTALPDEDDDL	-	ethanolamine (DE); ethanolamine (DE); ethanolamine (DE); ethanolamine (DE); ethanolamine (DE); more	P62826	1888.97	15
318	E(+43.04)VAQTTALPDE(+43.04)D(+43.04)D(+43.04)D(+43.04)L(+43.04)	D	L	EVAQTTALPDEDDDL	-	ethanolamine (DE); ethanolamine (DE); ethanolamine (DE); ethanolamine (DE); ethanolamine (DE); more	P62826	1888.97	15
319	EEIIPLGNQE	V	T	EEIIPLGNQE	-		P55884	1140.57	10
320	FAGPPNYPFSD(+43.04)E(+43.04)Y(+43.04)	D，D	I，I	FAGPPNYPFSDEY	-，-	ethanolamine (DE); ethanolamine (DE); ethanolamine (C-term)	P52895，Q04828	1631.76	13
321	FAIE(+43.04)E(+43.04)TE(+43.04)GFGQE(+43.04)(+43.04)	L，L	L，L	FAIEETEGFGQE	-，-	ethanolamine (DE); ethanolamine (DE); ethanolamine (DE); ethanolamine (C-term); ethanolamine (DE)	Q9H0M0，Q96J02	1570.8	12
322	FC(+57.02)VD(+43.04)QPTVPQTASE(+43.04)S(+43.04)	K	R	FCVDQPTVPQTASES	-	Carbamidomethylation; ethanolamine (DE); ethanolamine (DE); ethanolamine (C-term)	Q9BQE9	1793.86	15
323	FE(+43.04)C(+57.02)GE(+43.04)GE(+43.04)E(+43.04)AAE(+43.04)TE(+43.04)(+43.04)	V	R	FECGEGEEAAETE	-	ethanolamine (DE); Carbamidomethylation; ethanolamine (DE); ethanolamine (DE); ethanolamine (DE); more	P43897	1757.83	13
324	FGE(+43.04)E(+43.04)AE(+43.04)E(+43.04)E(+43.04)A(+43.04)	E	D	FGEEAEEEA	-	ethanolamine (DE); ethanolamine (DE); ethanolamine (DE); ethanolamine (DE); ethanolamine (DE); more	P07437	1267.64	9
325	FIHTNWTGHGGTVSSSSYNA(+43.04)	G	Q	FIHTNWTGHGGTVSSSSYNA	-	ethanolamine (C-term)	P52209	2164.99	20
326	FLD(+43.04)E(+43.04)LD(+43.04)AVQM(+15.99)D(+43.04)(+43.04)	R	R	FLDELDAVQMD	-	ethanolamine (DE); ethanolamine (DE); ethanolamine (DE); Oxidation (M); ethanolamine (C-term); more	O15160	1525.78	11
327	FLD(+43.04)E(+43.04)LD(+43.04)AVQMD(+43.04)(+43.04)	R	R	FLDELDAVQMD	-	ethanolamine (DE); ethanolamine (DE); ethanolamine (DE); ethanolamine (C-term); ethanolamine (DE)	O15160	1509.79	11
328	FLE(+43.04)MHQL(+43.04)	K	K	FLEMHQL	-	ethanolamine (DE); ethanolamine (C-term)	Q9Y617	1002.53	7
329	FLIVIQNPTE(+43.04)(+43.04)	D	Y	FLIVIQNPTE	-	ethanolamine (C-term); ethanolamine (DE)	Q9NP97	1258.73	10
330	FLLQQNFD(+43.04)E(+43.04)D(+43.04)(+43.04)	A	N	FLLQQNFDED	-	ethanolamine (DE); ethanolamine (DE); ethanolamine (C-term); ethanolamine (DE)	P54727	1439.74	10
331	FLLSQNFD(+43.04)D(+43.04)E(+43.04)(+43.04)	A	N	FLLSQNFDDE	-	ethanolamine (DE); ethanolamine (DE); ethanolamine (C-term); ethanolamine (DE)	P54725	1398.71	10
332	FPGGGAPPSGGASSGPTIE(+43.04)E(+43.04)VD(+43.04)(+43.04)	G	G	FPGGGAPPSGGASSGPTIEEVD	-	ethanolamine (DE); ethanolamine (DE); ethanolamine (C-term); ethanolamine (DE)	P11142	2157.07	22
333	FQVQD(+43.04)GAPGTFNF(+43.04)	Y	T	FQVQDGAPGTFNF	-	ethanolamine (DE); ethanolamine (C-term)	P52292	1512.74	13
334	FSTALYGE(+43.04)SD(+43.04)L(+43.04)	K，M	S，S	FSTALYGESDL	-，-	ethanolamine (DE); ethanolamine (DE); ethanolamine (C-term)	O43707，P12814	1330.68	11
335	FVQD(+43.04)LTD(+43.04)E(+43.04)(+43.04)	V	L	FVQDLTDE	-	ethanolamine (DE); ethanolamine (DE); ethanolamine (C-term); ethanolamine (DE)	Q96CS3	1137.6	8
336	GAAE(+43.04)E(+43.04)ALLQM(+15.99)E(+43.04)SVA(+43.04)	R	P	GAAEEALLQMESVA	-	ethanolamine (DE); ethanolamine (DE); Oxidation (M); ethanolamine (DE); ethanolamine (C-term)	Q969G5	1605.84	14
337	GAD(+43.04)PGMPE(+43.04)PTVLSLLWG(+43.04)	K	R	GADPGMPEPTVLSLLWG	-	ethanolamine (DE); ethanolamine (DE); ethanolamine (C-term)	Q9P0U1	1867.99	17
338	GAE(+43.04)D(+43.04)E(+43.04)E(+43.04)WD(+43.04)D(+43.04)(+43.04)	G	D	GAEDEEWDD	-	ethanolamine (DE); ethanolamine (DE); ethanolamine (DE); ethanolamine (DE); ethanolamine (DE); more	Q7Z6K5	1365.65	9
339	GALVHSE(+43.04)(+43.04)	G	A	GALVHSE	-	ethanolamine (C-term); ethanolamine (DE)	P21291	797.439	7
340	GAM(+15.99)GGM(+15.99)GGGM(+15.99)GGGM(+15.99)F(+43.04)	G	M	GAMGGMGGGMGGGMF	-	Oxidation (M); Oxidation (M); Oxidation (M); Oxidation (M); ethanolamine (C-term)	P10809	1380.49	15
341	GAM(+15.99)GGMGGGMGGGM(+15.99)F(+43.04)	G	M	GAMGGMGGGMGGGMF	-	Oxidation (M); Oxidation (M); ethanolamine (C-term)	P10809	1348.5	15
342	GAM(+15.99)GGMGGGMGGGMF(+43.04)	G	M	GAMGGMGGGMGGGMF	-	Oxidation (M); ethanolamine (C-term)	P10809	1332.51	15
343	GAMGGM(+15.99)GGGMGGGM(+15.99)F(+43.04)	G	M	GAMGGMGGGMGGGMF	-	Oxidation (M); Oxidation (M); ethanolamine (C-term)	P10809	1348.5	15
344	GAMGGMGGGM(+15.99)GGGMF(+43.04)	G	M	GAMGGMGGGMGGGMF	-	Oxidation (M); ethanolamine (C-term)	P10809	1332.51	15
345	GAMGGMGGGMGGGM(+15.99)F(+43.04)	G	M	GAMGGMGGGMGGGMF	-	Oxidation (M); ethanolamine (C-term)	P10809	1332.51	15
346	GAMGGMGGGMGGGMF(+43.04)	G	M	GAMGGMGGGMGGGMF	-	ethanolamine (C-term)	P10809	1316.51	15
347	GAPPSGGASSGPTIE(+43.04)E(+43.04)VD(+43.04)	G	G	GAPPSGGASSGPTIEEVD	-	ethanolamine (DE); ethanolamine (DE); ethanolamine (DE)	P11142	1755.86	18
348	GAPPSGGASSGPTIE(+43.04)E(+43.04)VD(+43.04)(+43.04)	G	G	GAPPSGGASSGPTIEEVD	-	ethanolamine (DE); ethanolamine (DE); ethanolamine (C-term); ethanolamine (DE)	P11142	1798.91	18
349	GASSGPTIE(+43.04)E(+43.04)VD(+43.04)	S	G	GASSGPTIEEVD	-	ethanolamine (DE); ethanolamine (DE); ethanolamine (DE)	P11142	1289.65	12
350	GASSGPTIE(+43.04)E(+43.04)VD(+43.04)(+43.04)	S	G	GASSGPTIEEVD	-	ethanolamine (DE); ethanolamine (DE); ethanolamine (C-term); ethanolamine (DE)	P11142	1332.69	12
351	GC(+57.02)YGAGYSGQNSMGGYD(+43.04)(+43.04)	V	S	GCYGAGYSGQNSMGGYD	-	Carbamidomethylation; ethanolamine (C-term); ethanolamine (DE)	P52597	1828.71	17
352	GD(+43.04)APAAGE(+43.04)D(+43.04)A(+43.04)	K	G	GDAPAAGEDA	-	ethanolamine (DE); ethanolamine (DE); ethanolamine (DE); ethanolamine (C-term)	P62851	1044.52	10
353	GD(+43.04)GGAE(+43.04)PGAC(+57.02)S(+43.04)	E	R	GDGGAEPGACS	-	ethanolamine (DE); ethanolamine (DE); Carbamidomethylation; ethanolamine (C-term)	Q9BQY9	1105.48	11
354	GD(+43.04)GGALGHHV(+43.04)	G	D	GDGGALGHHV	-	ethanolamine (DE); ethanolamine (C-term)	Q15019	1004.52	10
355	GD(+43.04)LAGATPE(+43.04)APAAAATATTGE(+43.04)(+43.04)	E	D	GDLAGATPEAPAAAATATTGE	-	ethanolamine (DE); ethanolamine (DE); ethanolamine (C-term); ethanolamine (DE)	Q9UGR2	2014.03	21
356	GD(+43.04)QVLC(+57.02)QGC(+57.02)SQAGP(+43.04)	P	D	GDQVLCQGCSQAGP	-	ethanolamine (DE); Carbamidomethylation; Carbamidomethylation; ethanolamine (C-term)	Q13643	1561.7	14
357	GDGGALGHHV(+43.04)	G	D	GDGGALGHHV	-	ethanolamine (C-term)	Q15019	961.473	10
358	GE(+43.04)APTE(+43.04)NPAPPTQQSSAE(+43.04)(+43.04)	K	A	GEAPTENPAPPTQQSSAE	-	ethanolamine (DE); ethanolamine (DE); ethanolamine (C-term); ethanolamine (DE)	P16989	1981.97	18
359	GE(+43.04)AVAPAHVPAPSPQGPGGLQGAST(+43.04)	I	L	GEAVAPAHVPAPSPQGPGGLQGAST	-	ethanolamine (DE); ethanolamine (C-term)	P33897	2338.2	25
360	GE(+43.04)D(+43.04)E(+43.04)GE(+43.04)E(+43.04)Y(+43.04)	A	D	GEDEGEEY	-	ethanolamine (DE); ethanolamine (DE); ethanolamine (DE); ethanolamine (DE); ethanolamine (DE); more	Q9BQE3	1184.57	8
361	GE(+43.04)D(+43.04)E(+43.04)GE(+43.04)EY(+43.04)	A	D	GEDEGEEY	-	ethanolamine (DE); ethanolamine (DE); ethanolamine (DE); ethanolamine (DE); ethanolamine (C-term)	Q9BQE3	1141.53	8
362	GE(+43.04)D(+43.04)ENE(+43.04)GE(+43.04)D(+43.04)YAE(+43.04)(+43.04)	V	D	GEDENEGEDYAE	-	ethanolamine (DE); ethanolamine (DE); ethanolamine (DE); ethanolamine (DE); ethanolamine (DE); more	P23588	1656.76	12
363	GE(+43.04)E(+43.04)E(+43.04)D(+43.04)VTVQE(+43.04)(+43.04)	P	D	GEEEDVTVQE	-	ethanolamine (DE); ethanolamine (DE); ethanolamine (DE); ethanolamine (DE); ethanolamine (C-term); more	Q5SW79	1391.73	10
364	GE(+43.04)E(+43.04)E(+43.04)E(+43.04)SME(+43.04)TQE(+43.04)(+43.04)	P	Q	GEEEESMETQE	-	ethanolamine (DE); ethanolamine (DE); ethanolamine (DE); ethanolamine (DE); ethanolamine (DE); more	Q12905	1597.76	11
365	GE(+43.04)E(+43.04)E(+43.04)GE(+43.04)E(+43.04)Y(+43.04)	G，G	E，E	GEEEGEEY	-，-	ethanolamine (DE); ethanolamine (DE); ethanolamine (DE); ethanolamine (DE); ethanolamine (DE); more	Q71U36，P68363	1198.58	8
366	GE(+43.04)E(+43.04)GGE(+43.04)APQE(+43.04)PQS(+43.04)	N	A	GEEGGEAPQEPQS	-	ethanolamine (DE); ethanolamine (DE); ethanolamine (DE); ethanolamine (DE); ethanolamine (C-term)	P31947	1528.75	13
367	GE(+43.04)GE(+43.04)E(+43.04)AAE(+43.04)TE(+43.04)(+43.04)	E	C	GEGEEAAETE	-	ethanolamine (DE); ethanolamine (DE); ethanolamine (DE); ethanolamine (DE); ethanolamine (C-term); more	P43897	1278.64	10
368	GE(+43.04)VVHTPE(+43.04)TSV(+43.04)	K	N	GEVVHTPETSV	-	ethanolamine (DE); ethanolamine (DE); ethanolamine (C-term)	O15427	1282.69	11
369	GFGFGQGAGALVHSE(+43.04)(+43.04)	P	K	GFGFGQGAGALVHSE	-	ethanolamine (C-term); ethanolamine (DE)	P21291	1518.76	15
370	GFGQGAGALVHSE(+43.04)(+43.04)	G	F	GFGQGAGALVHSE	-	ethanolamine (C-term); ethanolamine (DE)	P21291	1314.67	13
371	GFPGGGAPPSGGASSGPTIE(+43.04)E(+43.04)VD(+43.04)(+43.04)	P	G	GFPGGGAPPSGGASSGPTIEEVD	-	ethanolamine (DE); ethanolamine (DE); ethanolamine (C-term); ethanolamine (DE)	P11142	2214.09	23
372	GGAGAGD(+43.04)D(+43.04)E(+43.04)E(+43.04)E(+43.04)D(+43.04)	G	Q	GGAGAGDDEEED	-	ethanolamine (DE); ethanolamine (DE); ethanolamine (DE); ethanolamine (DE); ethanolamine (DE); more	P46781	1378.63	12
373	GGAGAGD(+43.04)D(+43.04)E(+43.04)E(+43.04)E(+43.04)D(+43.04)(+43.04)	G	Q	GGAGAGDDEEED	-	ethanolamine (DE); ethanolamine (DE); ethanolamine (DE); ethanolamine (DE); ethanolamine (DE); more	P46781	1421.67	12
374	GGAPPSGGASSGPTIE(+43.04)E(+43.04)VD(+43.04)	P	G	GGAPPSGGASSGPTIEEVD	-	ethanolamine (DE); ethanolamine (DE); ethanolamine (DE)	P11142	1812.89	19
375	GGAPPSGGASSGPTIE(+43.04)E(+43.04)VD(+43.04)(+43.04)	P	G	GGAPPSGGASSGPTIEEVD	-	ethanolamine (DE); ethanolamine (DE); ethanolamine (C-term); ethanolamine (DE)	P11142	1855.93	19
376	GGASSGPTIE(+43.04)E(+43.04)VD(+43.04)	P	S	GGASSGPTIEEVD	-	ethanolamine (DE); ethanolamine (DE); ethanolamine (DE)	P11142	1346.67	13
377	GGASSGPTIE(+43.04)E(+43.04)VD(+43.04)(+43.04)	P	S	GGASSGPTIEEVD	-	ethanolamine (DE); ethanolamine (DE); ethanolamine (C-term); ethanolamine (DE)	P11142	1389.71	13
378	GGD(+43.04)APAAGE(+43.04)D(+43.04)A(+43.04)	T	K	GGDAPAAGEDA	-	ethanolamine (DE); ethanolamine (DE); ethanolamine (DE); ethanolamine (C-term)	P62851	1101.54	11
379	GGGTGGSVYTE(+43.04)D(+43.04)ND(+43.04)D(+43.04)D(+43.04)LYG(+43.04)	G	S	GGGTGGSVYTEDNDDDLYG	-	ethanolamine (DE); ethanolamine (DE); ethanolamine (DE); ethanolamine (DE); ethanolamine (DE); more	P55072	2148.99	19
380	GGKPE(+43.04)PPAMPQPVPTA(+43.04)	Q	K	GGKPEPPAMPQPVPTA	-	ethanolamine (DE); ethanolamine (C-term)	P23396	1658.88	16
381	GGM(+15.99)GGGM(+15.99)GGGM(+15.99)F(+43.04)	A	M	GGMGGGMGGGMF	-	Oxidation (M); Oxidation (M); Oxidation (M); ethanolamine (C-term)	P10809	1105.4	12
382	GGM(+15.99)GGGM(+15.99)GGGMF(+43.04)	A	M	GGMGGGMGGGMF	-	Oxidation (M); Oxidation (M); ethanolamine (C-term)	P10809	1089.4	12
383	GGM(+15.99)GGGMGGGM(+15.99)F(+43.04)	A	M	GGMGGGMGGGMF	-	Oxidation (M); Oxidation (M); ethanolamine (C-term)	P10809	1089.4	12
384	GGM(+15.99)GGGMGGGMF(+43.04)	A	M	GGMGGGMGGGMF	-	Oxidation (M); ethanolamine (C-term)	P10809	1073.41	12
385	GGM(+15.99)PGGM(+15.99)PGGFPGGGAPPSGGASSGPTIE(+43.04)E(+43.04)VD(+43.04)(+43.04)	S	A	GGMPGGMPGGFPGGGAPPSGGASSGPTIEEVD	-	Oxidation (M); Oxidation (M); ethanolamine (DE); ethanolamine (DE); ethanolamine (C-term); more	P11142	2987.38	32
386	GGM(+15.99)PGGMPGGFPGGGAPPSGGASSGPTIE(+43.04)E(+43.04)VD(+43.04)(+43.04)	S	A	GGMPGGMPGGFPGGGAPPSGGASSGPTIEEVD	-	Oxidation (M); ethanolamine (DE); ethanolamine (DE); ethanolamine (C-term); ethanolamine (DE)	P11142	2971.38	32
387	GGMGGGM(+15.99)GGGMF(+43.04)	A	M	GGMGGGMGGGMF	-	Oxidation (M); ethanolamine (C-term)	P10809	1073.41	12
388	GGMGGGMGGGM(+15.99)F(+43.04)	A	M	GGMGGGMGGGMF	-	Oxidation (M); ethanolamine (C-term)	P10809	1073.41	12
389	GGMGGGMGGGMF(+43.04)	A	M	GGMGGGMGGGMF	-	ethanolamine (C-term)	P10809	1057.41	12
390	GGMPGGM(+15.99)PGGFPGGGAPPSGGASSGPTIE(+43.04)E(+43.04)VD(+43.04)(+43.04)	S	A	GGMPGGMPGGFPGGGAPPSGGASSGPTIEEVD	-	Oxidation (M); ethanolamine (DE); ethanolamine (DE); ethanolamine (C-term); ethanolamine (DE)	P11142	2971.38	32
391	GGMPGGMPGGFPGGGAPPSGGASSGPTIE(+43.04)E(+43.04)VD(+43.04)	S	A	GGMPGGMPGGFPGGGAPPSGGASSGPTIEEVD	-	ethanolamine (DE); ethanolamine (DE); ethanolamine (DE)	P11142	2912.34	32
392	GGMPGGMPGGFPGGGAPPSGGASSGPTIE(+43.04)E(+43.04)VD(+43.04)(+43.04)	S	A	GGMPGGMPGGFPGGGAPPSGGASSGPTIEEVD	-	ethanolamine (DE); ethanolamine (DE); ethanolamine (C-term); ethanolamine (DE)	P11142	2955.39	32
393	GGSAVISLE(+43.04)GKPL(+43.04)	K	L	GGSAVISLEGKPL	-	ethanolamine (DE); ethanolamine (C-term)	P23528	1312.77	13
394	GGSGSGPTIE(+43.04)E(+43.04)VD(+43.04)	P，P	K，K	GGSGSGPTIEEVD	-，-	ethanolamine (DE); ethanolamine (DE); ethanolamine (DE)	P0DMV8，P0DMV9	1332.65	13
395	GGSGSGPTIE(+43.04)E(+43.04)VD(+43.04)(+43.04)	P，P	K，K	GGSGSGPTIEEVD	-，-	ethanolamine (DE); ethanolamine (DE); ethanolamine (C-term); ethanolamine (DE)	P0DMV8，P0DMV9	1375.69	13
396	GGSGSGPTIE(+43.04)EVD(+43.04)(+43.04)	P，P	K，K	GGSGSGPTIEEVD	-，-	ethanolamine (DE); ethanolamine (C-term); ethanolamine (DE)	P0DMV8，P0DMV9	1332.65	13
397	GGSGSGPTIEE(+43.04)VD(+43.04)	P，P	K，K	GGSGSGPTIEEVD	-，-	ethanolamine (DE); ethanolamine (DE)	P0DMV8，P0DMV9	1289.61	13
398	GGSLIVAFE(+43.04)GC(+57.02)PV(+43.04)	K	L	GGSLIVAFEGCPV	-	ethanolamine (DE); Carbamidomethylation; ethanolamine (C-term)	P60981	1390.73	13
399	GGTGGSVYTE(+43.04)D(+43.04)ND(+43.04)D(+43.04)D(+43.04)LYG(+43.04)	S	G	GGTGGSVYTEDNDDDLYG	-	ethanolamine (DE); ethanolamine (DE); ethanolamine (DE); ethanolamine (DE); ethanolamine (DE); more	P55072	2091.97	18
400	GGVAAGVAVLD(+43.04)NPYPV(+43.04)	A	D	GGVAAGVAVLDNPYPV	-	ethanolamine (DE); ethanolamine (C-term)	P48637	1583.87	16
401	GGYGGGGGYGGSSF(+43.04)	Y	R	GGYGGGGGYGGSSF	-	ethanolamine (C-term)	Q13151	1221.51	14
402	GGYVQD(+43.04)YE(+43.04)D(+43.04)FM(+15.99)(+43.04)	Y	D	GGYVQDYEDFM	-	ethanolamine (DE); ethanolamine (DE); ethanolamine (DE); Oxidation (M); ethanolamine (C-term)	O75822	1510.68	11
403	GGYVQD(+43.04)YE(+43.04)D(+43.04)FM(+43.04)	Y	D	GGYVQDYEDFM	-	ethanolamine (DE); ethanolamine (DE); ethanolamine (DE); ethanolamine (C-term)	O75822	1494.68	11
404	GHPLYPFND(+43.04)PY(+43.04)	D	A	GHPLYPFNDPY	-	ethanolamine (DE); ethanolamine (C-term)	P14550	1404.68	11
405	GHYD(+43.04)ILYK(+43.04)	R	P	GHYDILYK	-	ethanolamine (DE); ethanolamine (C-term)	Q96FW1	1093.59	8
406	GIY(+155.14)VSE(+43.04)KGTVQQAD(+43.04)E(+43.04)(+43.04)	L	D	GIYVSEKGTVQQADE	-	EDC(Y); ethanolamine (DE); ethanolamine (DE); ethanolamine (C-term); ethanolamine (DE)	P32969	1950.09	15
407	GKD(+43.04)VNFE(+43.04)FPE(+43.04)FQL(+43.04)	L	T	GKDVNFEFPEFQL	-	ethanolamine (DE); ethanolamine (DE); ethanolamine (DE); ethanolamine (C-term)	P62081	1740.92	13
408	GKLVSE(+43.04)SSD(+43.04)VLPK(+43.04)	R	D	GKLVSESSDVLPK	-	ethanolamine (DE); ethanolamine (DE); ethanolamine (C-term)	P05787	1486.87	13
409	GKPD(+43.04)PD(+43.04)TVPD(+43.04)S(+43.04)	A	N	GKPDPDTVPDS	-	ethanolamine (DE); ethanolamine (DE); ethanolamine (DE); ethanolamine (C-term)	Q7Z7H8	1298.68	11
410	GKPE(+43.04)PPAM(+15.99)PQPVPTA(+43.04)	K	G	GKPEPPAMPQPVPTA	-	ethanolamine (DE); Oxidation (M); ethanolamine (C-term)	P23396	1617.85	15
411	GKPE(+43.04)PPAMPQPVPTA(+43.04)	K	G	GKPEPPAMPQPVPTA	-	ethanolamine (DE); ethanolamine (C-term)	P23396	1601.86	15
412	GKYTPSGQAGAAASE(+43.04)SLFVSNHAY(+43.04)	C	Q	GKYTPSGQAGAAASESLFVSNHAY	-	ethanolamine (DE); ethanolamine (C-term)	P04075	2498.22	24
413	GLD(+43.04)E(+43.04)PQGQSGC(+57.02)LGQLQD(+43.04)(+43.04)	R	P	GLDEPQGQSGCLGQLQD	-	ethanolamine (DE); ethanolamine (DE); Carbamidomethylation; ethanolamine (C-term); ethanolamine (DE)	Q7Z736	1972.96	17
414	GLLLE(+43.04)ALGQE(+43.04)QE(+43.04)AGS(+43.04)	P	M	GLLLEALGQEQEAGS	-	ethanolamine (DE); ethanolamine (DE); ethanolamine (DE); ethanolamine (C-term)	O60831	1685.93	15
415	GLSSQE(+43.04)LSGGPGD(+43.04)GP(+43.04)	G	A	GLSSQELSGGPGDGP	-	ethanolamine (DE); ethanolamine (DE); ethanolamine (C-term)	Q13263	1485.74	15
416	GM(+15.99)GGGMGGGM(+15.99)F(+43.04)	M	G	GMGGGMGGGMF	-	Oxidation (M); Oxidation (M); ethanolamine (C-term)	P10809	1032.38	11
417	GME(+43.04)AIPNPFIQQQD(+43.04)A(+43.04)	Q	D	GMEAIPNPFIQQQDA	-	ethanolamine (DE); ethanolamine (DE); ethanolamine (C-term)	Q9UK45	1786.9	15
418	GMPGGFPGGGAPPSGGASSGPTIE(+43.04)E(+43.04)VD(+43.04)(+43.04)	P	G	GMPGGFPGGGAPPSGGASSGPTIEEVD	-	ethanolamine (DE); ethanolamine (DE); ethanolamine (C-term); ethanolamine (DE)	P11142	2556.23	27
419	GPASE(+43.04)VSAE(+43.04)GE(+43.04)E(+43.04)IFC(+57.02)(+43.04)	G	D	GPASEVSAEGEEIFC	-	ethanolamine (DE); ethanolamine (DE); ethanolamine (DE); ethanolamine (DE); Carbamidomethylation; more	Q12802	1795.88	15
420	GPPNYPFSD(+43.04)E(+43.04)Y(+43.04)	F，F	A，A	GPPNYPFSDEY	-，-	ethanolamine (DE); ethanolamine (DE); ethanolamine (C-term)	P52895，Q04828	1413.66	11
421	GQAVE(+43.04)VVTLE(+43.04)Q(+43.04)	M	D	GQAVEVVTLEQ	-	ethanolamine (DE); ethanolamine (DE); ethanolamine (C-term)	Q16656	1300.73	11
422	GQE(+43.04)VAQAQE(+43.04)S(+43.04)	R	T	GQEVAQAQES	-	ethanolamine (DE); ethanolamine (DE); ethanolamine (C-term)	Q9H098	1174.59	10
423	GQFIHTNWTGHGGTVSSSSYNA(+43.04)	K	P	GQFIHTNWTGHGGTVSSSSYNA	-	ethanolamine (C-term)	P52209	2350.07	22
424	GQGAGALVHSE(+43.04)(+43.04)	G	F	GQGAGALVHSE	-	ethanolamine (C-term); ethanolamine (DE)	P21291	1110.58	11
425	GQGGAGAGD(+43.04)D(+43.04)E(+43.04)E(+43.04)E(+43.04)D(+43.04)(+43.04)	K	K	GQGGAGAGDDEEED	-	ethanolamine (DE); ethanolamine (DE); ethanolamine (DE); ethanolamine (DE); ethanolamine (DE); more	P46781	1606.75	14
426	GQGGAGAGD(+43.04)D(+43.04)E(+43.04)E(+43.04)ED(+43.04)(+43.04)	K	K	GQGGAGAGDDEEED	-	ethanolamine (DE); ethanolamine (DE); ethanolamine (DE); ethanolamine (DE); ethanolamine (C-term); more	P46781	1563.71	14
427	GQGYTQPGPGYR(+43.04)	P	F	GQGYTQPGPGYR	-	ethanolamine (C-term)	Q92734	1322.64	12
428	GQSVLLQLPQ(+43.04)	P	A	GQSVLLQLPQ	-	ethanolamine (C-term)	P35232	1124.66	10
429	GQVINE(+43.04)TSQHHD(+43.04)D(+43.04)LE(+43.04)	R	D	GQVINETSQHHDDLE	-	ethanolamine (DE); ethanolamine (DE); ethanolamine (DE); ethanolamine (DE)	P08670	1892.93	15
430	GQVINE(+43.04)TSQHHD(+43.04)D(+43.04)LE(+43.04)(+43.04)	R	D	GQVINETSQHHDDLE	-	ethanolamine (DE); ethanolamine (DE); ethanolamine (DE); ethanolamine (C-term); ethanolamine (DE)	P08670	1935.98	15
431	GQVINE(+43.04)TSQHHDD(+43.04)LE(+43.04)(+43.04)	R	D	GQVINETSQHHDDLE	-	ethanolamine (DE); ethanolamine (DE); ethanolamine (C-term); ethanolamine (DE)	P08670	1892.93	15
432	GQVNYE(+43.04)E(+43.04)FVQM(+15.99)M(+15.99)TAK(+43.04)	G，G，G	D，D，D	GQVNYEEFVQMMTAK	-，-，-	ethanolamine (DE); ethanolamine (DE); Oxidation (M); Oxidation (M); ethanolamine (C-term)	P0DP24，P0DP25，P0DP23	1934.92	15
433	GQVNYE(+43.04)E(+43.04)FVQM(+15.99)MTAK(+43.04)	G，G，G	D，D，D	GQVNYEEFVQMMTAK	-，-，-	ethanolamine (DE); ethanolamine (DE); Oxidation (M); ethanolamine (C-term)	P0DP24，P0DP25，P0DP23	1918.93	15
434	GQVNYE(+43.04)E(+43.04)FVQMMTAK(+43.04)	G，G，G	D，D，D	GQVNYEEFVQMMTAK	-，-，-	ethanolamine (DE); ethanolamine (DE); ethanolamine (C-term)	P0DP24，P0DP25，P0DP23	1902.93	15
435	GQYGNYQQ(+43.04)	D，E	Q，Q	GQYGNYQQ	-，-	ethanolamine (C-term)	Q15532，O75177	999.441	8
436	GRHPHD(+43.04)IID(+43.04)D(+43.04)INSGAVE(+43.04)C(+57.02)PAS(+43.04)	V	D	GRHPHDIIDDINSGAVECPAS	-	ethanolamine (DE); ethanolamine (DE); ethanolamine (DE); ethanolamine (DE); Carbamidomethylation; more	P30050	2474.24	21
437	GRHPHDIID(+43.04)D(+43.04)INSGAVE(+43.04)C(+57.02)PAS(+43.04)	V	D	GRHPHDIIDDINSGAVECPAS	-	ethanolamine (DE); ethanolamine (DE); ethanolamine (DE); Carbamidomethylation; ethanolamine (C-term)	P30050	2431.2	21
[truncated: 3,480 more rows]
