# Supplementary material for: NAPT, an unbiased approach for sequential analysis of the protein N- and C-terminome
Source: Royal Society of Chemistry journal article supplement (doi:10.1039/d2cc03778e), 2022-01-01
Supplement: d2cc03778e3.xlsx [file d2cc03778e3.xlsx]

## Sheet: Table S3a
Table S3. List of identified terminal peptides from Hela cell using LysargiNase as protease after protein d3-acetylation.
Table S3a. List of identified N-terminal peptides.
Number	Peptide	secaaBefore	aaBefore	pepSeq	aaAfter	PTM	Accession	Mass	Length
1	A(+27.99)APAVSGLS	-	M	AAPAVSGLS	R	Formylation (Protein N-term)	P48047	799.408	9
2	A(+27.99)GGK(+45.03)AGK(+45.03)D(+43.04)SGK(+45.03)AK(+45.03)TK(+45.03)AVS	-	M	AGGKAGKDSGKAKTKAVS	R	Formylation (Protein N-term); acetyl-d3 (K); acetyl-d3 (K); ethanolamine (DE); acetyl-d3 (K); more	P0C0S5	1956.11	18
3	A(+27.99)PK(+45.03)AK(+45.03)K(+45.03)E(+43.04)APAPPK(+45.03)AE(+43.04)	-	M	APKAKKEAPAPPKAE	A	Formylation (Protein N-term); acetyl-d3 (K); acetyl-d3 (K); acetyl-d3 (K); ethanolamine (DE); more	P62750	1826.07	15
4	A(+27.99)PK(+45.03)AK(+45.03)K(+45.03)E(+43.04)APAPPK(+45.03)AE(+43.04)AK(+45.03)	-	M	APKAKKEAPAPPKAEAK	A	Formylation (Protein N-term); acetyl-d3 (K); acetyl-d3 (K); acetyl-d3 (K); ethanolamine (DE); more	P62750	2070.23	17
5	A(+27.99)PK(+45.03)AK(+45.03)K(+45.03)E(+43.04)APAPPK(+45.03)AE(+43.04)AK(+45.03)AK(+45.03)	-	M	APKAKKEAPAPPKAEAKAK	A	Formylation (Protein N-term); acetyl-d3 (K); acetyl-d3 (K); acetyl-d3 (K); ethanolamine (DE); more	P62750	2314.39	19
6	A(+27.99)PK(+45.03)AK(+45.03)K(+45.03)E(+43.04)APAPPK(+45.03)AE(+43.04)AK(+45.03)AK(+45.03)ALK(+45.03)	-	M	APKAKKEAPAPPKAEAKAKALK	A	Formylation (Protein N-term); acetyl-d3 (K); acetyl-d3 (K); acetyl-d3 (K); ethanolamine (DE); more	P62750	2671.64	22
7	A(+27.99)PK(+45.03)AK(+45.03)K(+45.03)E(+43.04)APAPPK(+45.03)AE(+43.04)AK(+45.03)AK(+45.03)ALK(+45.03)AK(+45.03)K(+45.03)AVLK(+45.03)GVHSHK(+45.03)K(+45.03)K(+45.03)K(+45.03)I	-	M	APKAKKEAPAPPKAEAKAKALKAKKAVLKGVHSHKKKKI	R	Formylation (Protein N-term); acetyl-d3 (K); acetyl-d3 (K); acetyl-d3 (K); ethanolamine (DE); more	P62750	4868.06	39
8	A(+27.99)PK(+45.03)GSSK(+45.03)QQSE(+43.04)E(+43.04)D(+43.04)LLLQD(+43.04)FS	-	M	APKGSSKQQSEEDLLLQDFS	R	Formylation (Protein N-term); acetyl-d3 (K); acetyl-d3 (K); ethanolamine (DE); ethanolamine (DE); more	Q9UNL2	2496.3	20
9	A(+42.01)AAAAAAAAAGAAGG	-	M	AAAAAAAAAAGAAGG	R	Acetylation (Protein N-term)	Q86U42	1083.53	15
10	A(+42.01)AAAAAAGD(+43.04)SD(+43.04)	-	M	AAAAAAAGDSD	S	Acetylation (Protein N-term); ethanolamine (DE); ethanolamine (DE)	O75822	1017.47	11
11	A(+42.01)AAAAAAGD(+43.04)SD(+43.04)SWD(+43.04)AD(+43.04)	-	M	AAAAAAAGDSDSWDAD	A	Acetylation (Protein N-term); ethanolamine (DE); ethanolamine (DE); ethanolamine (DE); ethanolamine (DE)	O75822	1677.76	16
12	A(+42.01)AAAAAAGD(+43.04)SD(+43.04)SWD(+43.04)AD(+43.04)A	-	M	AAAAAAAGDSDSWDADA	F	Acetylation (Protein N-term); ethanolamine (DE); ethanolamine (DE); ethanolamine (DE); ethanolamine (DE)	O75822	1748.8	17
13	A(+42.01)AAAAAAGD(+43.04)SD(+43.04)SWD(+43.04)AD(+43.04)AF	-	M	AAAAAAAGDSDSWDADAF	S	Acetylation (Protein N-term); ethanolamine (DE); ethanolamine (DE); ethanolamine (DE); ethanolamine (DE)	O75822	1895.86	18
14	A(+42.01)AAAAAAGD(+43.04)SD(+43.04)SWD(+43.04)ADA(+43.04)	-	M	AAAAAAAGDSDSWDADA	F	Acetylation (Protein N-term); ethanolamine (DE); ethanolamine (DE); ethanolamine (DE); ethanolamine (C-term)	O75822	1748.8	17
15	A(+42.01)AAAAAAGD(+43.04)SDSWD(+43.04)AD(+43.04)AF	-	M	AAAAAAAGDSDSWDADAF	S	Acetylation (Protein N-term); ethanolamine (DE); ethanolamine (DE); ethanolamine (DE)	O75822	1852.82	18
16	A(+42.01)AAAAAAGDSD(+43.04)(+43.04)	-	M	AAAAAAAGDSD	S	Acetylation (Protein N-term); ethanolamine (C-term); ethanolamine (DE)	O75822	1017.47	11
17	A(+42.01)AAAAAGAASGLPGPVAQGLK(+45.03)	-	M	AAAAAAGAASGLPGPVAQGLK	E	Acetylation (Protein N-term); acetyl-d3 (K)	Q96P70	1835	21
18	A(+42.01)AAAAAGAASGLPGPVAQGLK(+45.03)E(+43.04)A	-	M	AAAAAAGAASGLPGPVAQGLKEA	L	Acetylation (Protein N-term); acetyl-d3 (K); ethanolamine (DE)	Q96P70	2078.12	23
19	A(+42.01)AAAAAGAGPE(+43.04)M(+15.99)V	-	M	AAAAAAGAGPEMV	R	Acetylation (Protein N-term); ethanolamine (DE); Oxidation (M)	P28482	1186.57	13
20	A(+42.01)AAAAAGAGPE(+43.04)MV	-	M	AAAAAAGAGPEMV	R	Acetylation (Protein N-term); ethanolamine (DE)	P28482	1170.57	13
21	A(+42.01)AAAAAGAGPEM(+15.99)V	-	M	AAAAAAGAGPEMV	R	Acetylation (Protein N-term); Oxidation (M)	P28482	1143.52	13
22	A(+42.01)AAAAAGAGPEMV	-	M	AAAAAAGAGPEMV	R	Acetylation (Protein N-term)	P28482	1127.53	13
23	A(+42.01)AAAAAGE(+43.04)AR	-	M	AAAAAAGEAR	R	Acetylation (Protein N-term); ethanolamine (DE)	P09417	942.488	10
24	A(+42.01)AAAAAGPSPGSGPGD(+43.04)SPE(+43.04)GPE(+43.04)GE(+43.04)APE(+43.04)	-	M	AAAAAAGPSPGSGPGDSPEGPEGEAPE	R	Acetylation (Protein N-term); ethanolamine (DE); ethanolamine (DE); ethanolamine (DE); ethanolamine (DE); more	Q9UID3	2589.23	27
25	A(+42.01)AAAAAGSGTP	-	M	AAAAAAGSGTP	R	Acetylation (Protein N-term)	Q9NR33	885.419	11
26	A(+42.01)AAAAAGSGTPR	-	M	AAAAAAGSGTPR	E	Acetylation (Protein N-term)	Q9NR33	1041.52	12
27	A(+42.01)AAAAATAAAAASI	-	M	AAAAAATAAAAASI	R	Acetylation (Protein N-term)	Q8WVM8	1142.59	14
28	A(+42.01)AAAAAVGPGAGGAGS	-	M	AAAAAAVGPGAGGAGS	A	Acetylation (Protein N-term)	Q86X55	1196.58	16
29	A(+42.01)AAAAE(+43.04)QQQF	-	M	AAAAAEQQQF	Y	Acetylation (Protein N-term); ethanolamine (DE)	O00410	1118.54	10
30	A(+42.01)AAAAE(+43.04)QQQFY	-	M	AAAAAEQQQFY	L	Acetylation (Protein N-term); ethanolamine (DE)	O00410	1281.6	11
31	A(+42.01)AAAAE(+43.04)QQQFYL	-	M	AAAAAEQQQFYL	L	Acetylation (Protein N-term); ethanolamine (DE)	O00410	1394.68	12
32	A(+42.01)AAAAE(+43.04)QQQFYLLLGNLLSPD(+43.04)NVV	-	M	AAAAAEQQQFYLLLGNLLSPDNVV	R	Acetylation (Protein N-term); ethanolamine (DE); ethanolamine (DE)	O00410	2672.42	24
33	A(+42.01)AAAAE(+43.04)TPE(+43.04)VL	-	M	AAAAAETPEVL	R	Acetylation (Protein N-term); ethanolamine (DE); ethanolamine (DE)	Q9NXW9	1169.63	11
34	A(+42.01)AAAAGTATSQ	-	M	AAAAAGTATSQ	R	Acetylation (Protein N-term)	Q9Y2Z0	960.451	11
35	A(+42.01)AAAAM(+15.99)AE(+43.04)QE(+43.04)SA	-	M	AAAAAMAEQESA	R	Acetylation (Protein N-term); Oxidation (M); ethanolamine (DE); ethanolamine (DE)	Q7L5D6	1263.58	12
36	A(+42.01)AAAAMAE(+43.04)QE(+43.04)SA	-	M	AAAAAMAEQESA	R	Acetylation (Protein N-term); ethanolamine (DE); ethanolamine (DE)	Q7L5D6	1247.58	12
37	A(+42.01)AAAAQGGGGGE(+43.04)PR	-	M	AAAAAQGGGGGEPR	R	Acetylation (Protein N-term); ethanolamine (DE)	P27361	1253.61	14
38	A(+42.01)AAAASAPQQLSD(+43.04)	-	M	AAAAASAPQQLSD	E	Acetylation (Protein N-term); ethanolamine (DE)	Q9Y2U8	1284.63	13
39	A(+42.01)AAAASASQD(+43.04)E(+43.04)LNQLE(+43.04)	-	M	AAAAASASQDELNQLE	R	Acetylation (Protein N-term); ethanolamine (DE); ethanolamine (DE); ethanolamine (DE)	Q5VYK3	1758.87	16
40	A(+42.01)AAAASGAGGAAGAGTGGAGPAG	-	M	AAAAASGAGGAAGAGTGGAGPAG	R	Acetylation (Protein N-term)	Q9Y2K2	1639.76	23
41	A(+42.01)AAAASHLNLD(+43.04)AL	-	M	AAAAASHLNLDAL	R	Acetylation (Protein N-term); ethanolamine (DE)	Q13049	1321.7	13
42	A(+42.01)AAAAVGNAVPC(+57.02)GA	-	M	AAAAAVGNAVPCGA	R	Acetylation (Protein N-term); Carbamidomethylation	Q9HD20	1240.59	14
43	A(+42.01)AAAD(+43.04)SFSGGPAGV	-	M	AAAADSFSGGPAGV	R	Acetylation (Protein N-term); ethanolamine (DE)	Q96E14	1261.59	14
44	A(+42.01)AAAE(+43.04)C(+57.02)D(+43.04)VVM(+15.99)	-	M	AAAAECDVVM	A	Acetylation (Protein N-term); ethanolamine (DE); Carbamidomethylation; ethanolamine (DE); Oxidation (M)	Q99615	1179.53	10
45	A(+42.01)AAAE(+43.04)LSLLE(+43.04)K(+45.03)SL	-	M	AAAAELSLLEKSL	G	Acetylation (Protein N-term); ethanolamine (DE); ethanolamine (DE); acetyl-d3 (K)	O43324	1487.86	13
46	A(+42.01)AAAE(+43.04)LSLLE(+43.04)K(+45.03)SLGLSK(+45.03)GNK(+45.03)YSAQGE(+43.04)	-	M	AAAAELSLLEKSLGLSKGNKYSAQGE	R	Acetylation (Protein N-term); ethanolamine (DE); ethanolamine (DE); acetyl-d3 (K); acetyl-d3 (K); more	O43324	2940.61	26
47	A(+42.01)AAAGD(+43.04)GGGE(+43.04)GGAGLGSAAGLGPGPGL	-	M	AAAAGDGGGEGGAGLGSAAGLGPGPGL	R	Acetylation (Protein N-term); ethanolamine (DE); ethanolamine (DE)	Q9HCJ3	2192.08	27
48	A(+42.01)AAAGGGGPGTAVGATGSGIA	-	M	AAAAGGGGPGTAVGATGSGIA	A	Acetylation (Protein N-term)	Q92922	1611.79	21
49	A(+42.01)AAAGGGGPGTAVGATGSGIAA	-	M	AAAAGGGGPGTAVGATGSGIAA	A	Acetylation (Protein N-term)	Q92922	1682.82	22
50	A(+42.01)AAAGGGGPGTAVGATGSGIAAAAAGLAVY	-	M	AAAAGGGGPGTAVGATGSGIAAAAAGLAVY	R	Acetylation (Protein N-term)	Q92922	2399.21	30
51	A(+42.01)AAAK(+45.03)PNNL	-	M	AAAAKPNNL	S	Acetylation (Protein N-term); acetyl-d3 (K)	Q00796	955.517	9
52	A(+42.01)AAAK(+45.03)PNNLSLVVHGPGD(+43.04)L	-	M	AAAAKPNNLSLVVHGPGDL	R	Acetylation (Protein N-term); acetyl-d3 (K); ethanolamine (DE)	Q00796	1973.08	19
53	A(+42.01)AAAK(+45.03)PNNLSLVVHGPGDL(+43.04)	-	M	AAAAKPNNLSLVVHGPGDL	R	Acetylation (Protein N-term); acetyl-d3 (K); ethanolamine (C-term)	Q00796	1973.08	19
54	A(+42.01)AAAM(+15.99)AAAAGGGAGAA	-	M	AAAAMAAAAGGGAGAA	R	Acetylation (Protein N-term); Oxidation (M)	Q9NX46	1216.55	16
55	A(+42.01)AAAMAAAAGGGAGAA	-	M	AAAAMAAAAGGGAGAA	R	Acetylation (Protein N-term)	Q9NX46	1200.56	16
56	A(+42.01)AAANSGSSLPLFD(+43.04)C(+57.02)PTW	-	M	AAAANSGSSLPLFDCPTW	A	Acetylation (Protein N-term); ethanolamine (DE); Carbamidomethylation	Q12972	1948.9	18
57	A(+42.01)AAAPVAAD(+43.04)D(+43.04)D(+43.04)E(+43.04)	-	M	AAAAPVAADDDE	R	Acetylation (Protein N-term); ethanolamine (DE); ethanolamine (DE); ethanolamine (DE); ethanolamine (DE)	Q9H5N1	1328.66	12
58	A(+42.01)AAAPVAAD(+43.04)D(+43.04)DE(+43.04)(+43.04)	-	M	AAAAPVAADDDE	R	Acetylation (Protein N-term); ethanolamine (DE); ethanolamine (DE); ethanolamine (C-term); ethanolamine (DE)	Q9H5N1	1328.66	12
59	A(+42.01)AAAPVAADD(+43.04)DE(+43.04)(+43.04)	-	M	AAAAPVAADDDE	R	Acetylation (Protein N-term); ethanolamine (DE); ethanolamine (C-term); ethanolamine (DE)	Q9H5N1	1285.62	12
60	A(+42.01)AAATAAE(+43.04)GVPS	-	M	AAAATAAEGVPS	R	Acetylation (Protein N-term); ethanolamine (DE)	Q8TBC3	1099.55	12
61	A(+42.01)AAAVGAGHGAGGPGAASSSGGA	-	M	AAAAVGAGHGAGGPGAASSSGGA	R	Acetylation (Protein N-term)	Q96K37	1749.8	23
62	A(+42.01)AAAVSE(+43.04)SWPE(+43.04)LE(+43.04)LAE(+43.04)	-	M	AAAAVSESWPELELAE	R	Acetylation (Protein N-term); ethanolamine (DE); ethanolamine (DE); ethanolamine (DE); ethanolamine (DE)	Q8N1G4	1885.98	16
63	A(+42.01)AAAVSSAK(+45.03)	-	M	AAAAVSSAK	R	Acetylation (Protein N-term); acetyl-d3 (K)	P49914	861.463	9
64	A(+42.01)AAAVVE(+43.04)FQ	-	M	AAAAVVEFQ	R	Acetylation (Protein N-term); ethanolamine (DE)	O00231	989.518	9
65	A(+42.01)AAD(+43.04)GD(+43.04)D(+43.04)SLYPIAVLID(+43.04)	-	M	AAADGDDSLYPIAVLID	E	Acetylation (Protein N-term); ethanolamine (DE); ethanolamine (DE); ethanolamine (DE); ethanolamine (DE)	P30153	1932.02	17
66	A(+42.01)AAD(+43.04)GD(+43.04)D(+43.04)SLYPIAVLID(+43.04)E(+43.04)L	-	M	AAADGDDSLYPIAVLIDEL	R	Acetylation (Protein N-term); ethanolamine (DE); ethanolamine (DE); ethanolamine (DE); ethanolamine (DE); more	P30153	2217.19	19
67	A(+42.01)AAD(+43.04)GDD(+43.04)SLYPIAVLID(+43.04)E(+43.04)L	-	M	AAADGDDSLYPIAVLIDEL	R	Acetylation (Protein N-term); ethanolamine (DE); ethanolamine (DE); ethanolamine (DE); ethanolamine (DE)	P30153	2174.15	19
68	A(+42.01)AAE(+43.04)AGGD(+43.04)D(+43.04)ARC(+57.02)V	-	M	AAAEAGGDDARCV	R	Acetylation (Protein N-term); ethanolamine (DE); ethanolamine (DE); ethanolamine (DE); Carbamidomethylation	A6NDG6	1432.67	13
69	A(+42.01)AAE(+43.04)AGGD(+43.04)DARC(+57.02)V	-	M	AAAEAGGDDARCV	R	Acetylation (Protein N-term); ethanolamine (DE); ethanolamine (DE); Carbamidomethylation	A6NDG6	1389.63	13
70	A(+42.01)AAE(+43.04)AGGDD(+43.04)ARC(+57.02)V	-	M	AAAEAGGDDARCV	R	Acetylation (Protein N-term); ethanolamine (DE); ethanolamine (DE); Carbamidomethylation	A6NDG6	1389.63	13
71	A(+42.01)AAE(+43.04)E(+43.04)E(+43.04)PK(+45.03)PK(+45.03)K(+45.03)LK(+45.03)VE(+43.04)APQAL	-	M	AAAEEEPKPKKLKVEAPQAL	R	Acetylation (Protein N-term); ethanolamine (DE); ethanolamine (DE); ethanolamine (DE); acetyl-d3 (K); more	P55263	2540.5	20
72	A(+42.01)AAE(+43.04)E(+43.04)GC(+57.02)SVGAE(+43.04)AD(+43.04)	-	M	AAAEEGCSVGAEAD	R	Acetylation (Protein N-term); ethanolamine (DE); ethanolamine (DE); Carbamidomethylation; ethanolamine (DE); more	P40855	1549.7	14
73	A(+42.01)AAGAAATHLE(+43.04)VA	-	M	AAAGAAATHLEVA	R	Acetylation (Protein N-term); ethanolamine (DE)	Q96S52	1236.65	13
74	A(+42.01)AAITD(+43.04)M(+15.99)AD(+43.04)LE(+43.04)E(+43.04)LS	-	M	AAAITDMADLEELS	R	Acetylation (Protein N-term); ethanolamine (DE); Oxidation (M); ethanolamine (DE); ethanolamine (DE); more	Q6ZN18	1678.84	14
75	A(+42.01)AAK(+45.03)D(+43.04)THE(+43.04)D(+43.04)H	-	M	AAAKDTHEDH	D	Acetylation (Protein N-term); acetyl-d3 (K); ethanolamine (DE); ethanolamine (DE); ethanolamine (DE)	P43487	1309.65	10
76	A(+42.01)AAK(+45.03)D(+43.04)THE(+43.04)D(+43.04)HD	-	M	AAAKDTHEDHD	T	Acetylation (Protein N-term); acetyl-d3 (K); ethanolamine (DE); ethanolamine (DE); ethanolamine (DE)	P43487	1424.67	11
77	A(+42.01)AAK(+45.03)D(+43.04)THE(+43.04)D(+43.04)HD(+43.04)	-	M	AAAKDTHEDHD	T	Acetylation (Protein N-term); acetyl-d3 (K); ethanolamine (DE); ethanolamine (DE); ethanolamine (DE); more	P43487	1467.71	11
78	A(+42.01)AAK(+45.03)D(+43.04)THE(+43.04)D(+43.04)HD(+43.04)T	-	M	AAAKDTHEDHDT	S	Acetylation (Protein N-term); acetyl-d3 (K); ethanolamine (DE); ethanolamine (DE); ethanolamine (DE); more	P43487	1568.76	12
79	A(+42.01)AAK(+45.03)D(+43.04)THE(+43.04)D(+43.04)HD(+43.04)TS	-	M	AAAKDTHEDHDTS	T	Acetylation (Protein N-term); acetyl-d3 (K); ethanolamine (DE); ethanolamine (DE); ethanolamine (DE); more	P43487	1655.79	13
80	A(+42.01)AAK(+45.03)D(+43.04)THE(+43.04)D(+43.04)HD(+43.04)TST	-	M	AAAKDTHEDHDTST	E	Acetylation (Protein N-term); acetyl-d3 (K); ethanolamine (DE); ethanolamine (DE); ethanolamine (DE); more	P43487	1756.84	14
81	A(+42.01)AAK(+45.03)D(+43.04)THE(+43.04)D(+43.04)HD(+43.04)TST(+43.04)	-	M	AAAKDTHEDHDTST	E	Acetylation (Protein N-term); acetyl-d3 (K); ethanolamine (DE); ethanolamine (DE); ethanolamine (DE); more	P43487	1799.88	14
82	A(+42.01)AAK(+45.03)D(+43.04)THE(+43.04)D(+43.04)HD(+43.04)TSTE(+43.04)N	-	M	AAAKDTHEDHDTSTEN	T	Acetylation (Protein N-term); acetyl-d3 (K); ethanolamine (DE); ethanolamine (DE); ethanolamine (DE); more	P43487	2042.97	16
83	A(+42.01)AAK(+45.03)D(+43.04)THE(+43.04)D(+43.04)HD(+43.04)TSTENTD(+43.04)	-	M	AAAKDTHEDHDTSTENTD	E	Acetylation (Protein N-term); acetyl-d3 (K); ethanolamine (DE); ethanolamine (DE); ethanolamine (DE); more	P43487	2259.04	18
84	A(+42.01)AAK(+45.03)D(+43.04)THE(+43.04)D(+43.04)HDTST	-	M	AAAKDTHEDHDTST	E	Acetylation (Protein N-term); acetyl-d3 (K); ethanolamine (DE); ethanolamine (DE); ethanolamine (DE)	P43487	1713.8	14
85	A(+42.01)AAK(+45.03)D(+43.04)THE(+43.04)DH(+43.04)	-	M	AAAKDTHEDH	D	Acetylation (Protein N-term); acetyl-d3 (K); ethanolamine (DE); ethanolamine (DE); ethanolamine (C-term)	P43487	1309.65	10
86	A(+42.01)AAK(+45.03)D(+43.04)THE(+43.04)DHD(+43.04)	-	M	AAAKDTHEDHD	T	Acetylation (Protein N-term); acetyl-d3 (K); ethanolamine (DE); ethanolamine (DE); ethanolamine (DE)	P43487	1424.67	11
87	A(+42.01)AAK(+45.03)D(+43.04)THE(+43.04)DHD(+43.04)TST	-	M	AAAKDTHEDHDTST	E	Acetylation (Protein N-term); acetyl-d3 (K); ethanolamine (DE); ethanolamine (DE); ethanolamine (DE)	P43487	1713.8	14
88	A(+42.01)AAK(+45.03)D(+43.04)THE(+43.04)DHD(+43.04)TSTE(+43.04)NTD(+43.04)	-	M	AAAKDTHEDHDTSTENTD	E	Acetylation (Protein N-term); acetyl-d3 (K); ethanolamine (DE); ethanolamine (DE); ethanolamine (DE); more	P43487	2259.04	18
89	A(+42.01)AAK(+45.03)D(+43.04)THED(+43.04)HD(+43.04)TST	-	M	AAAKDTHEDHDTST	E	Acetylation (Protein N-term); acetyl-d3 (K); ethanolamine (DE); ethanolamine (DE); ethanolamine (DE)	P43487	1713.8	14
90	A(+42.01)AAK(+45.03)D(+43.04)THED(+43.04)HD(+43.04)TST(+43.04)	-	M	AAAKDTHEDHDTST	E	Acetylation (Protein N-term); acetyl-d3 (K); ethanolamine (DE); ethanolamine (DE); ethanolamine (DE); more	P43487	1756.84	14
91	A(+42.01)AAK(+45.03)D(+43.04)THEDHD(+43.04)TST	-	M	AAAKDTHEDHDTST	E	Acetylation (Protein N-term); acetyl-d3 (K); ethanolamine (DE); ethanolamine (DE)	P43487	1670.76	14
92	A(+42.01)AAK(+45.03)DTHE(+43.04)D(+43.04)HD(+43.04)TST	-	M	AAAKDTHEDHDTST	E	Acetylation (Protein N-term); acetyl-d3 (K); ethanolamine (DE); ethanolamine (DE); ethanolamine (DE)	P43487	1713.8	14
93	A(+42.01)AAK(+45.03)VALTK(+45.03)	-	M	AAAKVALTK	R	Acetylation (Protein N-term); acetyl-d3 (K); acetyl-d3 (K)	Q9UJS0	1003.62	9
94	A(+42.01)AALGASGGAGAGD(+43.04)D(+43.04)D(+43.04)FD(+43.04)QFDK(+45.03)PGAE(+43.04)(+43.04)	-	M	AAALGASGGAGAGDDDFDQFDKPGAE	R	Acetylation (Protein N-term); ethanolamine (DE); ethanolamine (DE); ethanolamine (DE); ethanolamine (DE); more	Q96EV2	2754.33	26
95	A(+42.01)AAM(+15.99)D(+43.04)VD(+43.04)TPSGTNSGAGK(+45.03)K(+45.03)	-	M	AAAMDVDTPSGTNSGAGKK	R	Acetylation (Protein N-term); Oxidation (M); ethanolamine (DE); ethanolamine (DE); acetyl-d3 (K); more	P62877	2010.98	19
96	A(+42.01)AAM(+15.99)D(+43.04)VDTPSGTNSGAGK(+45.03)K(+45.03)	-	M	AAAMDVDTPSGTNSGAGKK	R	Acetylation (Protein N-term); Oxidation (M); ethanolamine (DE); acetyl-d3 (K); acetyl-d3 (K)	P62877	1967.94	19
97	A(+42.01)AAM(+15.99)DVD(+43.04)TPSGTNSGAGK(+45.03)K(+45.03)	-	M	AAAMDVDTPSGTNSGAGKK	R	Acetylation (Protein N-term); Oxidation (M); ethanolamine (DE); acetyl-d3 (K); acetyl-d3 (K)	P62877	1967.94	19
98	A(+42.01)AAMD(+43.04)VD(+43.04)TPSGTNSGAGK(+45.03)K(+45.03)	-	M	AAAMDVDTPSGTNSGAGKK	R	Acetylation (Protein N-term); ethanolamine (DE); ethanolamine (DE); acetyl-d3 (K); acetyl-d3 (K)	P62877	1994.98	19
99	A(+42.01)AAMD(+43.04)VDTPSGTNSGAGK(+45.03)K(+45.03)	-	M	AAAMDVDTPSGTNSGAGKK	R	Acetylation (Protein N-term); ethanolamine (DE); acetyl-d3 (K); acetyl-d3 (K)	P62877	1951.94	19
100	A(+42.01)AANK(+45.03)GNK(+45.03)PRV	-	M	AAANKGNKPRV	R	Acetylation (Protein N-term); acetyl-d3 (K); acetyl-d3 (K)	Q9GZN8	1256.71	11
101	A(+42.01)AAPALK(+45.03)HW	-	M	AAAPALKHW	R	Acetylation (Protein N-term); acetyl-d3 (K)	Q9NTJ4	1050.57	9
102	A(+42.01)AAPPSYC(+57.02)FVAFPP	-	M	AAAPPSYCFVAFPP	R	Acetylation (Protein N-term); Carbamidomethylation	Q12765	1535.71	14
103	A(+42.01)AATAD(+43.04)PGAGNPQPGD(+43.04)SSGGGAGGGLPSPGE(+43.04)QE(+43.04)LS	-	M	AAATADPGAGNPQPGDSSGGGAGGGLPSPGEQELS	R	Acetylation (Protein N-term); ethanolamine (DE); ethanolamine (DE); ethanolamine (DE); ethanolamine (DE)	Q6VN20	3247.53	35
104	A(+42.01)AATAD(+43.04)PGAGNPQPGD(+43.04)SSGGGAGGGLPSPGE(+43.04)QELS(+43.04)	-	M	AAATADPGAGNPQPGDSSGGGAGGGLPSPGEQELS	R	Acetylation (Protein N-term); ethanolamine (DE); ethanolamine (DE); ethanolamine (DE); ethanolamine (C-term)	Q6VN20	3247.53	35
105	A(+42.01)AATGAVAASAASGQ	-	M	AAATGAVAASAASGQ	A	Acetylation (Protein N-term)	Q9NWH9	1244.6	15
106	A(+42.01)AATGAVAASAASGQAE(+43.04)GK(+45.03)K(+45.03)ITD(+43.04)L	-	M	AAATGAVAASAASGQAEGKKITDL	R	Acetylation (Protein N-term); ethanolamine (DE); acetyl-d3 (K); acetyl-d3 (K); ethanolamine (DE)	Q9NWH9	2376.28	24
107	A(+42.01)AATGAVAASAASGQAE(+43.04)GK(+45.03)K(+45.03)ITDL(+43.04)	-	M	AAATGAVAASAASGQAEGKKITDL	R	Acetylation (Protein N-term); ethanolamine (DE); acetyl-d3 (K); acetyl-d3 (K); ethanolamine (C-term)	Q9NWH9	2376.28	24
108	A(+42.01)AATGD(+43.04)PGLSK(+45.03)LQ	-	M	AAATGDPGLSKLQ	F	Acetylation (Protein N-term); ethanolamine (DE); acetyl-d3 (K)	O95352	1357.73	13
109	A(+42.01)AATGPSFWLGNE(+43.04)TLK(+45.03)	-	M	AAATGPSFWLGNETLK	V	Acetylation (Protein N-term); ethanolamine (DE); acetyl-d3 (K)	P12955	1791.92	16
110	A(+42.01)AAVAAAGAGE(+43.04)PQ	-	M	AAAVAAAGAGEPQ	S	Acetylation (Protein N-term); ethanolamine (DE)	Q9NS69	1167.59	13
111	A(+42.01)AAVAAAGAGE(+43.04)PQSPD(+43.04)	-	M	AAAVAAAGAGEPQSPD	E	Acetylation (Protein N-term); ethanolamine (DE); ethanolamine (DE)	Q9NS69	1509.74	16
112	A(+42.01)AAVAAAGAGE(+43.04)PQSPD(+43.04)E(+43.04)LLPK(+45.03)GD(+43.04)	-	M	AAAVAAAGAGEPQSPDELLPKGD	A	Acetylation (Protein N-term); ethanolamine (DE); ethanolamine (DE); ethanolamine (DE); acetyl-d3 (K); more	Q9NS69	2393.26	23
113	A(+42.01)AAVAAAGAGE(+43.04)PQSPD(+43.04)E(+43.04)LLPK(+45.03)GD(+43.04)A	-	M	AAAVAAAGAGEPQSPDELLPKGDA	E	Acetylation (Protein N-term); ethanolamine (DE); ethanolamine (DE); ethanolamine (DE); acetyl-d3 (K); more	Q9NS69	2464.3	24
114	A(+42.01)AAVAVAAAS	-	M	AAAVAVAAAS	R	Acetylation (Protein N-term)	Q7Z5L9	842.45	10
115	A(+42.01)AAVLSGPSAGSAAGVPGGTGGLSAVSSGPRL	-	M	AAAVLSGPSAGSAAGVPGGTGGLSAVSSGPRL	R	Acetylation (Protein N-term)	Q8IZL8	2720.41	32
116	A(+42.01)AAVVVAE(+43.04)GD(+43.04)SD(+43.04)S	-	M	AAAVVVAEGDSDS	R	Acetylation (Protein N-term); ethanolamine (DE); ethanolamine (DE); ethanolamine (DE)	Q9UJX6	1360.68	13
117	A(+42.01)AAVVVAE(+43.04)GD(+43.04)SD(+43.04)SRPGQE(+43.04)L	-	M	AAAVVVAEGDSDSRPGQEL	L	Acetylation (Protein N-term); ethanolamine (DE); ethanolamine (DE); ethanolamine (DE); ethanolamine (DE)	Q9UJX6	2084.09	19
118	A(+42.01)AAVVVAE(+43.04)GD(+43.04)SDSRPGQE(+43.04)L	-	M	AAAVVVAEGDSDSRPGQEL	L	Acetylation (Protein N-term); ethanolamine (DE); ethanolamine (DE); ethanolamine (DE)	Q9UJX6	2041.04	19
119	A(+42.01)AAYLD(+43.04)PNLNHTPNSSTK(+45.03)THLGTGM(+15.99)E(+43.04)	-	M	AAAYLDPNLNHTPNSSTKTHLGTGME	R	Acetylation (Protein N-term); ethanolamine (DE); acetyl-d3 (K); Oxidation (M); ethanolamine (DE)	Q05397	2928.41	26
120	A(+42.01)AD(+43.04)ISE(+43.04)SSGAD(+43.04)C(+57.02)K(+45.03)GD(+43.04)P	-	M	AADISESSGADCKGDP	R	Acetylation (Protein N-term); ethanolamine (DE); ethanolamine (DE); ethanolamine (DE); Carbamidomethylation; more	O43583	1837.86	16
121	A(+42.01)AD(+43.04)ISE(+43.04)SSGADC(+57.02)K(+45.03)GD(+43.04)P	-	M	AADISESSGADCKGDP	R	Acetylation (Protein N-term); ethanolamine (DE); ethanolamine (DE); Carbamidomethylation; acetyl-d3 (K); more	O43583	1794.81	16
122	A(+42.01)AD(+43.04)TQVSE(+43.04)TLK(+45.03)	-	M	AADTQVSETLK	R	Acetylation (Protein N-term); ethanolamine (DE); ethanolamine (DE); acetyl-d3 (K)	Q92616	1334.71	11
123	A(+42.01)AD(+43.04)VSVTH	-	M	AADVSVTH	R	Acetylation (Protein N-term); ethanolamine (DE)	Q8IY67	883.44	8
124	A(+42.01)AE(+43.04)AAD(+43.04)LGLGAAVPVE(+43.04)L	-	M	AAEAADLGLGAAVPVEL	R	Acetylation (Protein N-term); ethanolamine (DE); ethanolamine (DE); ethanolamine (DE)	Q9Y5Q8	1736.97	17
125	A(+42.01)AE(+43.04)AAGGK(+45.03)Y	-	M	AAEAAGGKY	R	Acetylation (Protein N-term); ethanolamine (DE); acetyl-d3 (K)	Q96A65	966.485	9
126	A(+42.01)AE(+43.04)AD(+43.04)GPLK(+45.03)	-	M	AAEADGPLK	R	Acetylation (Protein N-term); ethanolamine (DE); ethanolamine (DE); acetyl-d3 (K)	O75352	1043.57	9
127	A(+42.01)AE(+43.04)ADGPLK(+45.03)	-	M	AAEADGPLK	R	Acetylation (Protein N-term); ethanolamine (DE); acetyl-d3 (K)	O75352	1000.53	9
128	A(+42.01)AE(+43.04)K(+45.03)QVPGGGGGGGSGGGGGSGGGGSGGG	-	M	AAEKQVPGGGGGGGSGGGGGSGGGGSGGG	R	Acetylation (Protein N-term); ethanolamine (DE); acetyl-d3 (K)	Q9UHB9	2215.99	29
129	A(+42.01)AE(+43.04)PNK(+45.03)TE(+43.04)IQTLFK(+45.03)	-	M	AAEPNKTEIQTLFK	R	Acetylation (Protein N-term); ethanolamine (DE); acetyl-d3 (K); ethanolamine (DE); acetyl-d3 (K)	Q8N6H7	1807	14
130	A(+42.01)AE(+43.04)SGSD(+43.04)FQQ	-	M	AAESGSDFQQ	R	Acetylation (Protein N-term); ethanolamine (DE); ethanolamine (DE)	Q96BP3	1166.52	10
131	A(+42.01)AE(+43.04)TLNFGPE(+43.04)WL	-	M	AAETLNFGPEWL	R	Acetylation (Protein N-term); ethanolamine (DE); ethanolamine (DE)	O75420	1474.75	12
132	A(+42.01)AE(+43.04)TQTLNFGPE(+43.04)WL	-	M	AAETQTLNFGPEWL	R	Acetylation (Protein N-term); ethanolamine (DE); ethanolamine (DE)	Q6Y7W6	1703.85	14
133	A(+42.01)AFGILSYE(+43.04)H	-	M	AAFGILSYEH	R	Acetylation (Protein N-term); ethanolamine (DE)	Q93074	1191.59	10
134	A(+42.01)AFSE(+43.04)M(+15.99)GVM(+15.99)PE(+43.04)IAQ	-	M	AAFSEMGVMPEIAQ	A	Acetylation (Protein N-term); ethanolamine (DE); Oxidation (M); Oxidation (M); ethanolamine (DE)	Q92499	1639.76	14
135	A(+42.01)AGAAE(+43.04)AAVAAV	-	M	AAGAAEAAVAAV	E	Acetylation (Protein N-term); ethanolamine (DE)	O76003	1055.56	12
136	A(+42.01)AGAAE(+43.04)AAVAAVE(+43.04)	-	M	AAGAAEAAVAAVE	E	Acetylation (Protein N-term); ethanolamine (DE); ethanolamine (DE)	O76003	1227.65	13
137	A(+42.01)AGAGTAGPASGPGVV	-	M	AAGAGTAGPASGPGVV	R	Acetylation (Protein N-term)	Q15554	1280.64	16
138	A(+42.01)AGFK(+45.03)TVE(+43.04)PLE(+43.04)YY	-	M	AAGFKTVEPLEYY	R	Acetylation (Protein N-term); acetyl-d3 (K); ethanolamine (DE); ethanolamine (DE)	Q96B26	1659.86	13
139	A(+42.01)AGGAVAAAPE(+43.04)C(+57.02)	-	M	AAGGAVAAAPEC	R	Acetylation (Protein N-term); ethanolamine (DE); Carbamidomethylation	Q9UL63	1128.52	12
140	A(+42.01)AGGD(+43.04)HGSPD(+43.04)SY	-	M	AAGGDHGSPDSY	R	Acetylation (Protein N-term); ethanolamine (DE); ethanolamine (DE)	P30566	1260.54	12
141	A(+42.01)AGGD(+43.04)HGSPDSY	-	M	AAGGDHGSPDSY	R	Acetylation (Protein N-term); ethanolamine (DE)	P30566	1217.49	12
142	A(+42.01)AGGDHGSPD(+43.04)SY	-	M	AAGGDHGSPDSY	R	Acetylation (Protein N-term); ethanolamine (DE)	P30566	1217.49	12
143	A(+42.01)AGGGGSC(+57.02)D(+43.04)PLAPAGVPC(+57.02)A	-	M	AAGGGGSCDPLAPAGVPCA	F	Acetylation (Protein N-term); Carbamidomethylation; ethanolamine (DE); Carbamidomethylation	Q15061	1768.79	19
144	A(+42.01)AGGGGSC(+57.02)D(+43.04)PLAPAGVPC(+57.02)AFSPHSQAY	-	M	AAGGGGSCDPLAPAGVPCAFSPHSQAY	F	Acetylation (Protein N-term); Carbamidomethylation; ethanolamine (DE); Carbamidomethylation	Q15061	2686.19	27
145	A(+42.01)AGTAAALAFLSQE(+43.04)S	-	M	AAGTAAALAFLSQES	R	Acetylation (Protein N-term); ethanolamine (DE)	O75607	1491.76	15
146	A(+42.01)AGTAAALAFLSQE(+43.04)SRT	-	M	AAGTAAALAFLSQESRT	R	Acetylation (Protein N-term); ethanolamine (DE)	O75607	1748.91	17
147	A(+42.01)AGTLYTY(+155.14)PENW	-	M	AAGTLYTYPENW	R	Acetylation (Protein N-term); EDC(Y)	P26641	1581.78	12
148	A(+42.01)AGTLYTYP	-	M	AAGTLYTYP	E	Acetylation (Protein N-term)	P26641	997.476	9
149	A(+42.01)AGTLYTYPE(+43.04)N	-	M	AAGTLYTYPEN	W	Acetylation (Protein N-term); ethanolamine (DE)	P26641	1283.6	11
150	A(+42.01)AGTLYTYPE(+43.04)NW	-	M	AAGTLYTYPENW	R	Acetylation (Protein N-term); ethanolamine (DE)	P26641	1469.68	12
151	A(+42.01)AGTLYTYPENW	-	M	AAGTLYTYPENW	R	Acetylation (Protein N-term)	P26641	1426.64	12
152	A(+42.01)AGVAGWGVE(+43.04)A	-	M	AAGVAGWGVEA	E	Acetylation (Protein N-term); ethanolamine (DE)	O43681	1071.53	11
153	A(+42.01)AGVAGWGVE(+43.04)AE(+43.04)	-	M	AAGVAGWGVEAE	E	Acetylation (Protein N-term); ethanolamine (DE); ethanolamine (DE)	O43681	1243.62	12
154	A(+42.01)AGVE(+43.04)AAAE(+43.04)VA	-	M	AAGVEAAAEVA	A	Acetylation (Protein N-term); ethanolamine (DE); ethanolamine (DE)	P52272	1085.57	11
155	A(+42.01)AGVE(+43.04)AAAE(+43.04)VAAT	-	M	AAGVEAAAEVAAT	E	Acetylation (Protein N-term); ethanolamine (DE); ethanolamine (DE)	P52272	1257.66	13
156	A(+42.01)AGVE(+43.04)AAAE(+43.04)VAATE(+43.04)IK(+45.03)	-	M	AAGVEAAAEVAATEIK	M	Acetylation (Protein N-term); ethanolamine (DE); ethanolamine (DE); ethanolamine (DE); acetyl-d3 (K)	P52272	1715.95	16
157	A(+42.01)AGVE(+43.04)AAAE(+43.04)VAATE(+43.04)IK(+45.03)M	-	M	AAGVEAAAEVAATEIKM	E	Acetylation (Protein N-term); ethanolamine (DE); ethanolamine (DE); ethanolamine (DE); acetyl-d3 (K)	P52272	1846.99	17
158	A(+42.01)AGVE(+43.04)AAAE(+43.04)VAATE(+43.04)IK(+45.03)M(+15.99)	-	M	AAGVEAAAEVAATEIKM	E	Acetylation (Protein N-term); ethanolamine (DE); ethanolamine (DE); ethanolamine (DE); acetyl-d3 (K); more	P52272	1862.98	17
159	A(+42.01)AGVE(+43.04)AAAE(+43.04)VAATE(+43.04)IK(+45.03)M(+15.99)(+43.04)	-	M	AAGVEAAAEVAATEIKM	E	Acetylation (Protein N-term); ethanolamine (DE); ethanolamine (DE); ethanolamine (DE); acetyl-d3 (K); more	P52272	1906.03	17
160	A(+42.01)AGVE(+43.04)AAAE(+43.04)VAATE(+43.04)IK(+45.03)M(+15.99)EE(+43.04)(+43.04)	-	M	AAGVEAAAEVAATEIKMEE	E	Acetylation (Protein N-term); ethanolamine (DE); ethanolamine (DE); ethanolamine (DE); acetyl-d3 (K); more	P52272	2207.15	19
161	A(+42.01)AGVE(+43.04)AAAE(+43.04)VAATE(+43.04)IK(+45.03)MEE(+43.04)(+43.04)	-	M	AAGVEAAAEVAATEIKMEE	E	Acetylation (Protein N-term); ethanolamine (DE); ethanolamine (DE); ethanolamine (DE); acetyl-d3 (K); more	P52272	2191.16	19
162	A(+42.01)AIGVHLGC(+57.02)TS	-	M	AAIGVHLGCTS	A	Acetylation (Protein N-term); Carbamidomethylation	Q0VDF9	1126.54	11
163	A(+42.01)AIGVHLGC(+57.02)TSAC(+57.02)V	-	M	AAIGVHLGCTSACV	A	Acetylation (Protein N-term); Carbamidomethylation; Carbamidomethylation	Q0VDF9	1456.68	14
164	A(+42.01)AIPSSGSLVATHD(+43.04)YY	-	M	AAIPSSGSLVATHDYY	R	Acetylation (Protein N-term); ethanolamine (DE)	Q9H3Y8	1735.84	16
165	A(+42.01)AIPSSGSLVATHDYY(+43.04)	-	M	AAIPSSGSLVATHDYY	R	Acetylation (Protein N-term); ethanolamine (C-term)	Q9H3Y8	1735.84	16
166	A(+42.01)AIYGGVE(+43.04)GGGT	-	M	AAIYGGVEGGGT	R	Acetylation (Protein N-term); ethanolamine (DE)	Q9UJ70	1135.55	12
167	A(+42.01)AK(+45.03)GAHGSYLK(+45.03)VE(+43.04)SE(+43.04)LE(+43.04)	-	M	AAKGAHGSYLKVESELE	R	Acetylation (Protein N-term); acetyl-d3 (K); acetyl-d3 (K); ethanolamine (DE); ethanolamine (DE); more	Q9ULT0	2049.1	17
168	A(+42.01)AK(+45.03)SQPNIPK(+45.03)AK(+45.03)	-	M	AAKSQPNIPKAK	S	Acetylation (Protein N-term); acetyl-d3 (K); acetyl-d3 (K); acetyl-d3 (K)	Q9UBM7	1428.83	12
169	A(+42.01)AK(+45.03)SQPNIPK(+45.03)AK(+45.03)SLD(+43.04)	-	M	AAKSQPNIPKAKSLD	G	Acetylation (Protein N-term); acetyl-d3 (K); acetyl-d3 (K); acetyl-d3 (K); ethanolamine (DE)	Q9UBM7	1787.01	15
170	A(+42.01)AK(+45.03)SQPNIPK(+45.03)AK(+45.03)SLD(+43.04)GVTND(+43.04)	-	M	AAKSQPNIPKAKSLDGVTND	R	Acetylation (Protein N-term); acetyl-d3 (K); acetyl-d3 (K); acetyl-d3 (K); ethanolamine (DE); more	Q9UBM7	2316.26	20
171	A(+42.01)AK(+45.03)SQPNIPK(+45.03)AK(+45.03)SLDGVTND(+43.04)	-	M	AAKSQPNIPKAKSLDGVTND	R	Acetylation (Protein N-term); acetyl-d3 (K); acetyl-d3 (K); acetyl-d3 (K); ethanolamine (DE)	Q9UBM7	2273.22	20
172	A(+42.01)AK(+45.03)VFE(+43.04)SIGK(+45.03)	-	M	AAKVFESIGK	F	Acetylation (Protein N-term); acetyl-d3 (K); ethanolamine (DE); acetyl-d3 (K)	P35232	1223.7	10
173	A(+42.01)AK(+45.03)VFE(+43.04)SIGK(+45.03)FGL	-	M	AAKVFESIGKFGL	A	Acetylation (Protein N-term); acetyl-d3 (K); ethanolamine (DE); acetyl-d3 (K)	P35232	1540.88	13
174	A(+42.01)ALAPLPPLPAQFK(+45.03)SIQHHL	-	M	AALAPLPPLPAQFKSIQHHL	R	Acetylation (Protein N-term); acetyl-d3 (K)	Q9NP79	2235.26	20
175	A(+42.01)ALGHLAGE(+43.04)	-	M	AALGHLAGE	A	Acetylation (Protein N-term); ethanolamine (DE)	Q9H7E9	922.487	9
176	A(+42.01)ALGHLAGE(+43.04)A	-	M	AALGHLAGEA	A	Acetylation (Protein N-term); ethanolamine (DE)	Q9H7E9	993.524	10
177	A(+42.01)ALGHLAGE(+43.04)AA	-	M	AALGHLAGEAA	A	Acetylation (Protein N-term); ethanolamine (DE)	Q9H7E9	1064.56	11
178	A(+42.01)ALGHLAGE(+43.04)AAAAPGPG	-	M	AALGHLAGEAAAAPGPG	T	Acetylation (Protein N-term); ethanolamine (DE)	Q9H7E9	1514.78	17
179	A(+42.01)ALGHLAGE(+43.04)AAAAPGPGTPC(+57.02)AS	-	M	AALGHLAGEAAAAPGPGTPCAS	R	Acetylation (Protein N-term); ethanolamine (DE); Carbamidomethylation	Q9H7E9	2030.98	22
180	A(+42.01)ALGHLAGEA(+43.04)	-	M	AALGHLAGEA	A	Acetylation (Protein N-term); ethanolamine (C-term)	Q9H7E9	993.524	10
181	A(+42.01)ALGHLAGEAAAAPGPGTPC(+57.02)AS	-	M	AALGHLAGEAAAAPGPGTPCAS	R	Acetylation (Protein N-term); Carbamidomethylation	Q9H7E9	1987.94	22
182	A(+42.01)ALGPSSQNVTE(+43.04)YVV	-	M	AALGPSSQNVTEYVV	R	Acetylation (Protein N-term); ethanolamine (DE)	P35269	1618.82	15
183	A(+42.01)ALGSPSHTF	-	M	AALGSPSHTF	R	Acetylation (Protein N-term)	Q96HJ9	1028.49	10
184	A(+42.01)ALGVAE(+43.04)AVAAPHPAE(+43.04)GAE(+43.04)TAE(+43.04)AVE(+43.04)LS	-	M	AALGVAEAVAAPHPAEGAETAEAVELS	R	Acetylation (Protein N-term); ethanolamine (DE); ethanolamine (DE); ethanolamine (DE); ethanolamine (DE); more	Q86Y56	2787.48	27
185	A(+42.01)ALTAE(+43.04)HFAALQSL	-	M	AALTAEHFAALQSL	L	Acetylation (Protein N-term); ethanolamine (DE)	Q9P000	1526.81	14
186	A(+42.01)ALTTLFK(+45.03)YID(+43.04)E(+43.04)NQD(+43.04)	-	M	AALTTLFKYIDENQD	R	Acetylation (Protein N-term); acetyl-d3 (K); ethanolamine (DE); ethanolamine (DE); ethanolamine (DE)	Q96KP4	1957.02	15
187	A(+42.01)ALVLE(+43.04)D(+43.04)GSVL	-	M	AALVLEDGSVL	R	Acetylation (Protein N-term); ethanolamine (DE); ethanolamine (DE)	P27708	1213.69	11
188	A(+42.01)ALVLE(+43.04)DGSVL	-	M	AALVLEDGSVL	R	Acetylation (Protein N-term); ethanolamine (DE)	P27708	1170.65	11
189	A(+42.01)ALVLEDGSVL	-	M	AALVLEDGSVL	R	Acetylation (Protein N-term)	P27708	1127.61	11
190	A(+42.01)ALYAC(+57.02)TK(+45.03)C(+57.02)HQ	-	M	AALYACTKCHQ	R	Acetylation (Protein N-term); Carbamidomethylation; acetyl-d3 (K); Carbamidomethylation	Q8TAV0	1408.63	11
191	A(+42.01)ANATTNPSQLLPLE(+43.04)LVD(+43.04)K(+45.03)C(+57.02)IGS	-	M	AANATTNPSQLLPLELVDKCIGS	R	Acetylation (Protein N-term); ethanolamine (DE); ethanolamine (DE); acetyl-d3 (K); Carbamidomethylation	Q9Y4Y9	2584.36	23
192	A(+42.01)ANK(+45.03)PK(+45.03)GQNSL	-	M	AANKPKGQNSL	A	Acetylation (Protein N-term); acetyl-d3 (K); acetyl-d3 (K)	P11233	1258.68	11
193	A(+42.01)ANVGSM(+15.99)FQYWK(+45.03)	-，-	M，M	AANVGSMFQYWK	R，R	Acetylation (Protein N-term); Oxidation (M); acetyl-d3 (K)	Q13948，O14529	1503.69	12
194	A(+42.01)ANYSSTSTR	-	M	AANYSSTSTR	R	Acetylation (Protein N-term)	Q9BTV4	1098.49	10
195	A(+42.01)APAGGGGSAVSVLAPNG	-	M	AAPAGGGGSAVSVLAPNG	R	Acetylation (Protein N-term)	Q9BZE9	1493.75	18
196	A(+42.01)APAQQTTQPGGGK(+45.03)	-	M	AAPAQQTTQPGGGK	R	Acetylation (Protein N-term); acetyl-d3 (K)	Q9NXG2	1397.7	14
197	A(+42.01)APE(+43.04)GSGLGE(+43.04)D(+43.04)A	-	M	AAPEGSGLGEDA	R	Acetylation (Protein N-term); ethanolamine (DE); ethanolamine (DE); ethanolamine (DE)	Q96G03	1243.6	12
198	A(+42.01)APGPALC(+57.02)LFD(+43.04)VDGTLTAP	-	M	AAPGPALCLFDVDGTLTAP	R	Acetylation (Protein N-term); Carbamidomethylation; ethanolamine (DE)	O15305	1969.98	19
199	A(+42.01)APPE(+43.04)PGE(+43.04)PE(+43.04)E(+43.04)	-	M	AAPPEPGEPEE	R	Acetylation (Protein N-term); ethanolamine (DE); ethanolamine (DE); ethanolamine (DE); ethanolamine (DE)	Q5RI15	1335.67	11
200	A(+42.01)APRPSPAISV	-	M	AAPRPSPAISV	S	Acetylation (Protein N-term)	Q15942	1106.61	11
201	A(+42.01)APSAGSWSTFQHK(+45.03)E(+43.04)L	-	M	AAPSAGSWSTFQHKEL	M	Acetylation (Protein N-term); acetyl-d3 (K); ethanolamine (DE)	P42575	1845.91	16
202	A(+42.01)APSD(+43.04)GFK(+45.03)PR	-	M	AAPSDGFKPR	E	Acetylation (Protein N-term); ethanolamine (DE); acetyl-d3 (K)	Q92979	1174.62	10
203	A(+42.01)APSD(+43.04)GFK(+45.03)PRE(+43.04)	-	M	AAPSDGFKPRE	R	Acetylation (Protein N-term); ethanolamine (DE); acetyl-d3 (K); ethanolamine (DE)	Q92979	1346.7	11
204	A(+42.01)APSDGFK(+45.03)PRE(+43.04)	-	M	AAPSDGFKPRE	R	Acetylation (Protein N-term); acetyl-d3 (K); ethanolamine (DE)	Q92979	1303.66	11
205	A(+42.01)APSPSGGGGSGGGSGSGTPGPVGSPAPGHPAVSSM(+15.99)QGK(+45.03)	-	M	AAPSPSGGGGSGGGSGSGTPGPVGSPAPGHPAVSSMQGK	R	Acetylation (Protein N-term); Oxidation (M); acetyl-d3 (K)	P45985	3345.54	39
206	A(+42.01)APVVAPPGVVVS	-	M	AAPVVAPPGVVVS	R	Acetylation (Protein N-term)	Q13144	1203.69	13
207	A(+42.01)AQAAAAAQAAAAQAAQ	-	M	AAQAAAAAQAAAAQAAQ	A	Acetylation (Protein N-term)	Q9Y6X3	1495.74	17
208	A(+42.01)AQALALL	-	M	AAQALALL	R	Acetylation (Protein N-term)	Q16401	811.48	8
209	A(+42.01)AQC(+57.02)VTK(+45.03)VAL	-	M	AAQCVTKVAL	N	Acetylation (Protein N-term); Carbamidomethylation; acetyl-d3 (K)	O75131	1146.61	10
210	A(+42.01)AQGE(+43.04)PQVQFK(+45.03)	-	M	AAQGEPQVQFK	L	Acetylation (Protein N-term); ethanolamine (DE); acetyl-d3 (K)	P62826	1331.69	11
211	A(+42.01)AQGVGPGPGSAAPPGLE(+43.04)AA	-，-	M，M	AAQGVGPGPGSAAPPGLEAA	R，R	Acetylation (Protein N-term); ethanolamine (DE)	Q6NZ67，Q6P582	1758.89	20
212	A(+42.01)AQGVGPGPGSAAPPGLEAA(+43.04)	-，-	M，M	AAQGVGPGPGSAAPPGLEAA	R，R	Acetylation (Protein N-term); ethanolamine (C-term)	Q6NZ67，Q6P582	1758.89	20
213	A(+42.01)AQIPIVATTSTPGIV	-	M	AAQIPIVATTSTPGIV	R	Acetylation (Protein N-term)	Q6PI98	1579.88	16
214	A(+42.01)AQK(+45.03)INE(+43.04)GLE(+43.04)HL	-	M	AAQKINEGLEHL	A	Acetylation (Protein N-term); acetyl-d3 (K); ethanolamine (DE); ethanolamine (DE)	Q99747	1494.82	12
215	A(+42.01)AQSAPK(+45.03)VVLK(+45.03)STTK(+45.03)M(+15.99)SLNE(+43.04)	-	M	AAQSAPKVVLKSTTKMSLNE	R	Acetylation (Protein N-term); acetyl-d3 (K); acetyl-d3 (K); acetyl-d3 (K); Oxidation (M); more	Q9Y3Y2	2338.28	20
216	A(+42.01)AQVAPAAASSLGNPPPPPPSE(+43.04)LK(+45.03)K(+45.03)AE(+43.04)QQQ	-	M	AAQVAPAAASSLGNPPPPPPSELKKAEQQQ	R	Acetylation (Protein N-term); ethanolamine (DE); acetyl-d3 (K); acetyl-d3 (K); ethanolamine (DE)	O14497	3196.7	30
217	A(+42.01)AQVAPAAASSLGNPPPPPPSE(+43.04)LK(+45.03)K(+45.03)AEQQQ(+43.04)	-	M	AAQVAPAAASSLGNPPPPPPSELKKAEQQQ	R	Acetylation (Protein N-term); ethanolamine (DE); acetyl-d3 (K); acetyl-d3 (K); ethanolamine (C-term)	O14497	3196.7	30
218	A(+42.01)ASAAAAE(+43.04)LQ	-	M	AASAAAAELQ	A	Acetylation (Protein N-term); ethanolamine (DE)	Q9HCN4	986.503	10
219	A(+42.01)ASAAAAE(+43.04)LQASGGP	-	M	AASAAAAELQASGGP	R	Acetylation (Protein N-term); ethanolamine (DE)	Q9HCN4	1355.67	15
220	A(+42.01)ASAAAASAAAASAASG	-	M	AASAAAASAAAASAASG	S	Acetylation (Protein N-term)	Q13263	1317.62	17
221	A(+42.01)ASAAAASAAAASAASGSPGPGE(+43.04)GSAGGE(+43.04)K(+45.03)	-	M	AASAAAASAAAASAASGSPGPGEGSAGGEK	R	Acetylation (Protein N-term); ethanolamine (DE); ethanolamine (DE); acetyl-d3 (K)	Q13263	2559.22	30
222	A(+42.01)ASAAAASAAAASAASGSPGPGE(+43.04)GSAGGEK(+45.03)	-	M	AASAAAASAAAASAASGSPGPGEGSAGGEK	R	Acetylation (Protein N-term); ethanolamine (DE); acetyl-d3 (K)	Q13263	2516.18	30
223	A(+42.01)ASAAAASAAAASAASGSPGPGE(+43.04)GSAGGEK(+45.03)(+43.04)	-	M	AASAAAASAAAASAASGSPGPGEGSAGGEK	R	Acetylation (Protein N-term); ethanolamine (DE); acetyl-d3 (K); ethanolamine (C-term)	Q13263	2559.22	30
224	A(+42.01)ASAAAASAAAASAASGSPGPGEGSAGGE(+43.04)K(+45.03)	-	M	AASAAAASAAAASAASGSPGPGEGSAGGEK	R	Acetylation (Protein N-term); ethanolamine (DE); acetyl-d3 (K)	Q13263	2516.18	30
225	A(+42.01)ASAAAASAAAASAASGSPGPGEGSAGGEK(+45.03)(+43.04)	-	M	AASAAAASAAAASAASGSPGPGEGSAGGEK	R	Acetylation (Protein N-term); acetyl-d3 (K); ethanolamine (C-term)	Q13263	2516.18	30
226	A(+42.01)ASAK(+45.03)K(+45.03)K(+45.03)NK(+45.03)K(+45.03)	-	M	AASAKKKNKK	G	Acetylation (Protein N-term); acetyl-d3 (K); acetyl-d3 (K); acetyl-d3 (K); acetyl-d3 (K); more	P23588	1339.83	10
227	A(+42.01)ASAK(+45.03)K(+45.03)K(+45.03)NK(+45.03)K(+45.03)G	-	M	AASAKKKNKKG	K	Acetylation (Protein N-term); acetyl-d3 (K); acetyl-d3 (K); acetyl-d3 (K); acetyl-d3 (K); more	P23588	1396.85	11
228	A(+42.01)ASAK(+45.03)K(+45.03)K(+45.03)NK(+45.03)K(+45.03)GK(+45.03)	-	M	AASAKKKNKKGK	T	Acetylation (Protein N-term); acetyl-d3 (K); acetyl-d3 (K); acetyl-d3 (K); acetyl-d3 (K); more	P23588	1569.97	12
229	A(+42.01)ASAK(+45.03)K(+45.03)K(+45.03)NK(+45.03)K(+45.03)GK(+45.03)TI	-	M	AASAKKKNKKGKTI	S	Acetylation (Protein N-term); acetyl-d3 (K); acetyl-d3 (K); acetyl-d3 (K); acetyl-d3 (K); more	P23588	1784.11	14
230	A(+42.01)ASAK(+45.03)K(+45.03)K(+45.03)NK(+45.03)K(+45.03)GK(+45.03)TIS	-	M	AASAKKKNKKGKTIS	L	Acetylation (Protein N-term); acetyl-d3 (K); acetyl-d3 (K); acetyl-d3 (K); acetyl-d3 (K); more	P23588	1871.14	15
231	A(+42.01)ASAK(+45.03)K(+45.03)K(+45.03)NK(+45.03)K(+45.03)GK(+45.03)TISLTD(+43.04)FL	-	M	AASAKKKNKKGKTISLTDFL	A	Acetylation (Protein N-term); acetyl-d3 (K); acetyl-d3 (K); acetyl-d3 (K); acetyl-d3 (K); more	P23588	2503.49	20
232	A(+42.01)ASAK(+45.03)K(+45.03)K(+45.03)NK(+45.03)K(+45.03)GK(+45.03)TISLTD(+43.04)FLA	-	M	AASAKKKNKKGKTISLTDFLA	E	Acetylation (Protein N-term); acetyl-d3 (K); acetyl-d3 (K); acetyl-d3 (K); acetyl-d3 (K); more	P23588	2574.53	21
233	A(+42.01)ASAK(+45.03)K(+45.03)K(+45.03)NK(+45.03)K(+45.03)GK(+45.03)TISLTD(+43.04)FLA(+43.04)	-	M	AASAKKKNKKGKTISLTDFLA	E	Acetylation (Protein N-term); acetyl-d3 (K); acetyl-d3 (K); acetyl-d3 (K); acetyl-d3 (K); more	P23588	2617.57	21
234	A(+42.01)ASAK(+45.03)K(+45.03)K(+45.03)NK(+45.03)K(+45.03)GK(+45.03)TISLTD(+43.04)FLAE(+43.04)D(+43.04)	-	M	AASAKKKNKKGKTISLTDFLAED	G	Acetylation (Protein N-term); acetyl-d3 (K); acetyl-d3 (K); acetyl-d3 (K); acetyl-d3 (K); more	P23588	2904.68	23
235	A(+42.01)ASC(+57.02)VLLHTGQK(+45.03)	-	M	AASCVLLHTGQK	M	Acetylation (Protein N-term); Carbamidomethylation; acetyl-d3 (K)	P14550	1370.71	12
236	A(+42.01)ASC(+57.02)VLLHTGQK(+45.03)M(+15.99)PLIGL	-	M	AASCVLLHTGQKMPLIGL	G	Acetylation (Protein N-term); Carbamidomethylation; acetyl-d3 (K); Oxidation (M)	P14550	2011.07	18
237	A(+42.01)ASC(+57.02)VLLHTGQK(+45.03)MPLIGL	-	M	AASCVLLHTGQKMPLIGL	G	Acetylation (Protein N-term); Carbamidomethylation; acetyl-d3 (K)	P14550	1995.07	18
238	A(+42.01)ASGAVE(+43.04)PGPPGA	-	M	AASGAVEPGPPGA	A	Acetylation (Protein N-term); ethanolamine (DE)	O75312	1164.58	13
239	A(+42.01)ASGE(+43.04)SGTSGGGGSTE(+43.04)E(+43.04)AF	-	M	AASGESGTSGGGGSTEEAF	M	Acetylation (Protein N-term); ethanolamine (DE); ethanolamine (DE); ethanolamine (DE)	O75937	1828.81	19
240	A(+42.01)ASGK(+45.03)LSTC(+57.02)	-	M	AASGKLSTC	R	Acetylation (Protein N-term); acetyl-d3 (K); Carbamidomethylation	Q8WVM0	980.468	9
241	A(+42.01)ASGVE(+43.04)K(+45.03)SSK(+45.03)K(+45.03)K(+45.03)TE(+43.04)K(+45.03)K(+45.03)LAA	-	M	AASGVEKSSKKKTEKKLAA	R	Acetylation (Protein N-term); ethanolamine (DE); acetyl-d3 (K); acetyl-d3 (K); acetyl-d3 (K); more	Q8IXQ5	2358.4	19
242	A(+42.01)ASK(+45.03)VK(+45.03)QD(+43.04)M(+15.99)PPPGGYGPID(+43.04)YK(+45.03)	-	M	AASKVKQDMPPPGGYGPIDYK	R	Acetylation (Protein N-term); acetyl-d3 (K); acetyl-d3 (K); ethanolamine (DE); Oxidation (M); more	Q9P0J0	2497.29	21
243	A(+42.01)ASK(+45.03)VK(+45.03)QD(+43.04)MPPPGGYGPID(+43.04)YK(+45.03)	-	M	AASKVKQDMPPPGGYGPIDYK	R	Acetylation (Protein N-term); acetyl-d3 (K); acetyl-d3 (K); ethanolamine (DE); ethanolamine (DE); more	Q9P0J0	2481.29	21
244	A(+42.01)ASLVGK(+45.03)K(+45.03)IVFVTGNAK(+45.03)K(+45.03)LE(+43.04)	-	M	AASLVGKKIVFVTGNAKKLE	E	Acetylation (Protein N-term); acetyl-d3 (K); acetyl-d3 (K); acetyl-d3 (K); acetyl-d3 (K); more	Q9BY32	2337.41	20
245	A(+42.01)ASLVGK(+45.03)K(+45.03)IVFVTGNAK(+45.03)K(+45.03)LE(+43.04)(+43.04)	-	M	AASLVGKKIVFVTGNAKKLE	E	Acetylation (Protein N-term); acetyl-d3 (K); acetyl-d3 (K); acetyl-d3 (K); acetyl-d3 (K); more	Q9BY32	2380.45	20
246	A(+42.01)ASQAVE(+43.04)E(+43.04)M(+15.99)	-	M	AASQAVEEM	R	Acetylation (Protein N-term); ethanolamine (DE); ethanolamine (DE); Oxidation (M)	O15160	1078.5	9
247	A(+42.01)ASQAVE(+43.04)EM(+15.99)(+43.04)	-	M	AASQAVEEM	R	Acetylation (Protein N-term); ethanolamine (DE); Oxidation (M); ethanolamine (C-term)	O15160	1078.5	9
248	A(+42.01)ASQVLGE(+43.04)K(+45.03)INILSGE(+43.04)TVK(+45.03)AGD(+43.04)	-	M	AASQVLGEKINILSGETVKAGD	R	Acetylation (Protein N-term); ethanolamine (DE); acetyl-d3 (K); ethanolamine (DE); acetyl-d3 (K); more	Q9Y5Z9	2460.37	22
249	A(+42.01)ASSLE(+43.04)QK(+45.03)LS	-	M	AASSLEQKLS	R	Acetylation (Protein N-term); ethanolamine (DE); acetyl-d3 (K)	O14733	1162.63	10
250	A(+42.01)ASSSGE(+43.04)K(+45.03)E(+43.04)K(+45.03)E(+43.04)	-	M	AASSSGEKEKE	R	Acetylation (Protein N-term); ethanolamine (DE); acetyl-d3 (K); ethanolamine (DE); acetyl-d3 (K); more	Q9NPJ6	1382.72	11
251	A(+42.01)ATAAAVVAE(+43.04)E(+43.04)D(+43.04)TE(+43.04)L	-	M	AATAAAVVAEEDTEL	R	Acetylation (Protein N-term); ethanolamine (DE); ethanolamine (DE); ethanolamine (DE); ethanolamine (DE)	O95684	1673.88	15
252	A(+42.01)ATALLE(+43.04)AGLA	-	M	AATALLEAGLA	R	Acetylation (Protein N-term); ethanolamine (DE)	Q8WUK0	1084.61	11
253	A(+42.01)ATASAGAGGID(+43.04)	-	M	AATASAGAGGID	G	Acetylation (Protein N-term); ethanolamine (DE)	Q02978	1045.5	12
254	A(+42.01)ATASAGAGGID(+43.04)GK(+45.03)P	-	M	AATASAGAGGIDGKP	R	Acetylation (Protein N-term); ethanolamine (DE); acetyl-d3 (K)	Q02978	1372.7	15
255	A(+42.01)ATASAGAGGIDGK(+45.03)P	-	M	AATASAGAGGIDGKP	R	Acetylation (Protein N-term); acetyl-d3 (K)	Q02978	1329.66	15
256	A(+42.01)ATFFGE(+43.04)VVK(+45.03)	-	M	AATFFGEVVK	A	Acetylation (Protein N-term); ethanolamine (DE); acetyl-d3 (K)	O95456	1197.65	10
257	A(+42.01)ATFFGE(+43.04)VVK(+45.03)APC(+57.02)	-	M	AATFFGEVVKAPC	R	Acetylation (Protein N-term); ethanolamine (DE); acetyl-d3 (K); Carbamidomethylation	O95456	1525.77	13
258	A(+42.01)ATGANAE(+43.04)K(+45.03)AE(+43.04)SHND(+43.04)C(+57.02)PV	-	M	AATGANAEKAESHNDCPV	R	Acetylation (Protein N-term); ethanolamine (DE); acetyl-d3 (K); ethanolamine (DE); ethanolamine (DE); more	Q16831	2056.97	18
259	A(+42.01)ATM(+15.99)K(+45.03)K(+45.03)AAAE(+43.04)D(+43.04)VNVTFE(+43.04)D(+43.04)QQK(+45.03)INK(+45.03)FA	-	M	AATMKKAAAEDVNVTFEDQQKINKFA	R	Acetylation (Protein N-term); Oxidation (M); acetyl-d3 (K); acetyl-d3 (K); ethanolamine (DE); more	Q9NQP4	3277.74	26
260	A(+42.01)ATMK(+45.03)K(+45.03)AAAE(+43.04)D(+43.04)VNVTFE(+43.04)D(+43.04)QQK(+45.03)INK(+45.03)FA	-	M	AATMKKAAAEDVNVTFEDQQKINKFA	R	Acetylation (Protein N-term); acetyl-d3 (K); acetyl-d3 (K); ethanolamine (DE); ethanolamine (DE); more	Q9NQP4	3261.75	26
261	A(+42.01)ATSGTD(+43.04)E(+43.04)PVSGE(+43.04)LVSVAHAL	-	M	AATSGTDEPVSGELVSVAHAL	S	Acetylation (Protein N-term); ethanolamine (DE); ethanolamine (DE); ethanolamine (DE)	Q9BVG4	2181.13	21
262	A(+42.01)ATTGSGVK(+45.03)VP	-	M	AATTGSGVKVP	R	Acetylation (Protein N-term); acetyl-d3 (K)	Q13404	1073.58	11
263	A(+42.01)ATTGSGVK(+45.03)VPRNF	-	M	AATTGSGVKVPRNF	R	Acetylation (Protein N-term); acetyl-d3 (K)	Q13404	1490.79	14
264	A(+42.01)AVAAGGLVGK(+45.03)G	-	M	AAVAAGGLVGKG	R	Acetylation (Protein N-term); acetyl-d3 (K)	Q8IZD4	1056.6	12
265	A(+42.01)AVAGSGAAAAPSSL	-	M	AAVAGSGAAAAPSSL	L	Acetylation (Protein N-term)	Q66K74	1241.63	15
266	A(+42.01)AVD(+43.04)LE(+43.04)K(+45.03)L	-	M	AAVDLEKL	R	Acetylation (Protein N-term); ethanolamine (DE); ethanolamine (DE); acetyl-d3 (K)	P17858	1030.61	8
267	A(+42.01)AVGAGGSTAAPGPGAVS	-	M	AAVGAGGSTAAPGPGAVS	A	Acetylation (Protein N-term)	P78381	1438.71	18
268	A(+42.01)AVGAGGSTAAPGPGAVSAGALE(+43.04)PGTASAAH	-	M	AAVGAGGSTAAPGPGAVSAGALEPGTASAAH	R	Acetylation (Protein N-term); ethanolamine (DE)	P78381	2615.29	31
269	A(+42.01)AVK(+45.03)ASTSK(+45.03)AT	-	M	AAVKASTSKAT	R	Acetylation (Protein N-term); acetyl-d3 (K); acetyl-d3 (K)	Q9NWZ8	1165.65	11
270	A(+42.01)AVK(+45.03)D(+43.04)SC(+57.02)GK(+45.03)G	-	M	AAVKDSCGKG	E	Acetylation (Protein N-term); acetyl-d3 (K); ethanolamine (DE); Carbamidomethylation; acetyl-d3 (K)	P61758	1166.59	10
271	A(+42.01)AVK(+45.03)D(+43.04)SC(+57.02)GK(+45.03)GE(+43.04)	-	M	AAVKDSCGKGE	M	Acetylation (Protein N-term); acetyl-d3 (K); ethanolamine (DE); Carbamidomethylation; acetyl-d3 (K); more	P61758	1338.67	11
272	A(+42.01)AVK(+45.03)D(+43.04)SC(+57.02)GK(+45.03)GE(+43.04)M(+15.99)ATGNG	-	M	AAVKDSCGKGEMATGNG	R	Acetylation (Protein N-term); acetyl-d3 (K); ethanolamine (DE); Carbamidomethylation; acetyl-d3 (K); more	P61758	1885.88	17
273	A(+42.01)AVK(+45.03)D(+43.04)SC(+57.02)GK(+45.03)GE(+43.04)MATGNG	-	M	AAVKDSCGKGEMATGNG	R	Acetylation (Protein N-term); acetyl-d3 (K); ethanolamine (DE); Carbamidomethylation; acetyl-d3 (K); more	P61758	1869.88	17
274	A(+42.01)AVK(+45.03)D(+43.04)SC(+57.02)GK(+45.03)GEMATGNG	-	M	AAVKDSCGKGEMATGNG	R	Acetylation (Protein N-term); acetyl-d3 (K); ethanolamine (DE); Carbamidomethylation; acetyl-d3 (K)	P61758	1826.84	17
275	A(+42.01)AVK(+45.03)E(+43.04)PLE(+43.04)FHAK(+45.03)	-	M	AAVKEPLEFHAK	R	Acetylation (Protein N-term); acetyl-d3 (K); ethanolamine (DE); ethanolamine (DE); acetyl-d3 (K)	Q03701	1556.88	12
276	A(+42.01)AVK(+45.03)K(+45.03)E(+43.04)GGALSE(+43.04)AM	-	M	AAVKKEGGALSEAM	S	Acetylation (Protein N-term); acetyl-d3 (K); acetyl-d3 (K); ethanolamine (DE); ethanolamine (DE)	O60566	1578.86	14
277	A(+42.01)AVK(+45.03)K(+45.03)E(+43.04)GGALSE(+43.04)AM(+15.99)	-	M	AAVKKEGGALSEAM	S	Acetylation (Protein N-term); acetyl-d3 (K); acetyl-d3 (K); ethanolamine (DE); ethanolamine (DE); more	O60566	1594.85	14
278	A(+42.01)AVK(+45.03)TLNPK(+45.03)	-	M	AAVKTLNPK	A	Acetylation (Protein N-term); acetyl-d3 (K); acetyl-d3 (K)	P40227	1072.64	9
279	A(+42.01)AVK(+45.03)TLNPK(+45.03)A	-	M	AAVKTLNPKA	E	Acetylation (Protein N-term); acetyl-d3 (K); acetyl-d3 (K)	P40227	1143.68	10
280	A(+42.01)AVK(+45.03)TLNPK(+45.03)AE(+43.04)V	-	M	AAVKTLNPKAEV	A	Acetylation (Protein N-term); acetyl-d3 (K); acetyl-d3 (K); ethanolamine (DE)	P40227	1414.83	12
281	A(+42.01)AVK(+45.03)TLNPK(+45.03)AE(+43.04)VA	-	M	AAVKTLNPKAEVA	R	Acetylation (Protein N-term); acetyl-d3 (K); acetyl-d3 (K); ethanolamine (DE)	P40227	1485.87	13
282	A(+42.01)AVK(+45.03)TLNPK(+45.03)AEVA	-	M	AAVKTLNPKAEVA	R	Acetylation (Protein N-term); acetyl-d3 (K); acetyl-d3 (K)	P40227	1442.83	13
283	A(+42.01)AVK(+45.03)TLNPK(+45.03)AEVA(+43.04)	-	M	AAVKTLNPKAEVA	R	Acetylation (Protein N-term); acetyl-d3 (K); acetyl-d3 (K); ethanolamine (C-term)	P40227	1485.87	13
284	A(+42.01)AVLK(+45.03)PVLLGL	-	M	AAVLKPVLLGL	R	Acetylation (Protein N-term); acetyl-d3 (K)	Q9BRP1	1179.77	11
285	A(+42.01)AVLQQVLE(+43.04)	-	M	AAVLQQVLE	R	Acetylation (Protein N-term); ethanolamine (DE)	P12270	1054.6	9
286	A(+42.01)AVPE(+43.04)LLQQQE(+43.04)E(+43.04)D(+43.04)	-	M	AAVPELLQQQEED	R	Acetylation (Protein N-term); ethanolamine (DE); ethanolamine (DE); ethanolamine (DE); ethanolamine (DE)	Q9Y5X3	1682.88	13
287	A(+42.01)AVPE(+43.04)LLQQQE(+43.04)E(+43.04)D(+43.04)RSK(+45.03)L	-	M	AAVPELLQQQEEDRSKL	R	Acetylation (Protein N-term); ethanolamine (DE); ethanolamine (DE); ethanolamine (DE); ethanolamine (DE); more	Q9Y5X3	2212.23	17
288	A(+42.01)AVQAAE(+43.04)VK(+45.03)VD(+43.04)	-	M	AAVQAAEVKVD	G	Acetylation (Protein N-term); ethanolamine (DE); acetyl-d3 (K); ethanolamine (DE)	Q15046	1272.71	11
289	A(+42.01)AVQAAE(+43.04)VK(+45.03)VD(+43.04)GS	-	M	AAVQAAEVKVDGS	E	Acetylation (Protein N-term); ethanolamine (DE); acetyl-d3 (K); ethanolamine (DE)	Q15046	1416.77	13
290	A(+42.01)AVQAAE(+43.04)VK(+45.03)VD(+43.04)GSE(+43.04)PK(+45.03)LSK(+45.03)N	-	M	AAVQAAEVKVDGSEPKLSKN	E	Acetylation (Protein N-term); ethanolamine (DE); acetyl-d3 (K); ethanolamine (DE); ethanolamine (DE); more	Q15046	2346.31	20
291	A(+42.01)AVQAAE(+43.04)VK(+45.03)VD(+43.04)GSE(+43.04)PK(+45.03)LSK(+45.03)NE(+43.04)LK(+45.03)	-	M	AAVQAAEVKVDGSEPKLSKNELK	R	Acetylation (Protein N-term); ethanolamine (DE); acetyl-d3 (K); ethanolamine (DE); ethanolamine (DE); more	Q15046	2804.6	23
292	A(+42.01)AVQAAE(+43.04)VK(+45.03)VDGSE(+43.04)PK(+45.03)LSK(+45.03)NE(+43.04)LK(+45.03)	-	M	AAVQAAEVKVDGSEPKLSKNELK	R	Acetylation (Protein N-term); ethanolamine (DE); acetyl-d3 (K); ethanolamine (DE); acetyl-d3 (K); more	Q15046	2761.56	23
293	A(+42.01)AVQM(+15.99)D(+43.04)PE(+43.04)LAK(+45.03)	-	M	AAVQMDPELAK	R	Acetylation (Protein N-term); Oxidation (M); ethanolamine (DE); ethanolamine (DE); acetyl-d3 (K)	Q9Y312	1360.71	11
294	A(+42.01)AVQMD(+43.04)PE(+43.04)LAK(+45.03)	-	M	AAVQMDPELAK	R	Acetylation (Protein N-term); ethanolamine (DE); ethanolamine (DE); acetyl-d3 (K)	Q9Y312	1344.72	11
295	A(+42.01)AVQVVGSWPSVQP	-	M	AAVQVVGSWPSVQP	R	Acetylation (Protein N-term)	Q6AI08	1465.76	14
296	A(+42.01)AVVE(+43.04)NVVK(+45.03)LLG	-	M	AAVVENVVKLLG	E	Acetylation (Protein N-term); ethanolamine (DE); acetyl-d3 (K)	Q92785	1340.81	12
297	A(+42.01)AVVE(+43.04)VE(+43.04)VGGGAAGE(+43.04)	-	M	AAVVEVEVGGGAAGE	R	Acetylation (Protein N-term); ethanolamine (DE); ethanolamine (DE); ethanolamine (DE)	Q9H920	1484.78	15
298	A(+42.01)AYK(+45.03)LVLI	-，-	M，M	AAYKLVLI	R，R	Acetylation (Protein N-term); acetyl-d3 (K)	P18669，Q8N0Y7	976.604	8
299	A(+42.01)AYK(+45.03)LVLIRHG(+43.04)	-，-	M，M	AAYKLVLIRHG	E，E	Acetylation (Protein N-term); acetyl-d3 (K); ethanolamine (C-term)	P18669，Q8N0Y7	1369.83	11
300	A(+42.01)AYSYRPGPGAGPGPAAGA	-	M	AAYSYRPGPGAGPGPAAGA	A	Acetylation (Protein N-term)	O75340	1728.82	19
301	A(+42.01)C(+57.02)GLVASNL	-	M	ACGLVASNL	N	Acetylation (Protein N-term); Carbamidomethylation	P09382	945.459	9
302	A(+42.01)C(+57.02)GLVASNLN	-	M	ACGLVASNLN	L	Acetylation (Protein N-term); Carbamidomethylation	P09382	1059.5	10
303	A(+42.01)C(+57.02)GLVASNLNL	-	M	ACGLVASNLNL	K	Acetylation (Protein N-term); Carbamidomethylation	P09382	1172.59	11
304	A(+42.01)C(+57.02)GLVASNLNLK(+45.03)PG	-	M	ACGLVASNLNLKPG	E	Acetylation (Protein N-term); Carbamidomethylation; acetyl-d3 (K)	P09382	1499.78	14
305	A(+42.01)C(+57.02)GLVASNLNLK(+45.03)PGE(+43.04)C(+57.02)	-	M	ACGLVASNLNLKPGEC	L	Acetylation (Protein N-term); Carbamidomethylation; acetyl-d3 (K); ethanolamine (DE); Carbamidomethylation	P09382	1831.9	16
306	A(+42.01)C(+57.02)GLVASNLNLK(+45.03)PGE(+43.04)C(+57.02)L	-	M	ACGLVASNLNLKPGECL	R	Acetylation (Protein N-term); Carbamidomethylation; acetyl-d3 (K); ethanolamine (DE); Carbamidomethylation	P09382	1944.98	17
307	A(+42.01)C(+57.02)GLVASNLNLK(+45.03)PGEC(+57.02)(+43.04)	-	M	ACGLVASNLNLKPGEC	L	Acetylation (Protein N-term); Carbamidomethylation; acetyl-d3 (K); Carbamidomethylation; ethanolamine (C-term)	P09382	1831.9	16
308	A(+42.01)C(+57.02)GLVASNLNLK(+45.03)PGEC(+57.02)L	-	M	ACGLVASNLNLKPGECL	R	Acetylation (Protein N-term); Carbamidomethylation; acetyl-d3 (K); Carbamidomethylation	P09382	1901.94	17
309	A(+42.01)C(+57.02)PLD(+43.04)QAIGL	-	M	ACPLDQAIGL	L	Acetylation (Protein N-term); Carbamidomethylation; ethanolamine (DE)	P06703	1141.58	10
310	A(+42.01)C(+57.02)PLD(+43.04)QAIGLL	-	M	ACPLDQAIGLL	V	Acetylation (Protein N-term); Carbamidomethylation; ethanolamine (DE)	P06703	1254.66	11
311	A(+42.01)C(+57.02)PLD(+43.04)QAIGLLV	-	M	ACPLDQAIGLLV	A	Acetylation (Protein N-term); Carbamidomethylation; ethanolamine (DE)	P06703	1353.73	12
312	A(+42.01)C(+57.02)PLD(+43.04)QAIGLLVA	-	M	ACPLDQAIGLLVA	I	Acetylation (Protein N-term); Carbamidomethylation; ethanolamine (DE)	P06703	1424.77	13
313	A(+42.01)C(+57.02)PLE(+43.04)K(+45.03)AL	-	M	ACPLEKAL	D	Acetylation (Protein N-term); Carbamidomethylation; ethanolamine (DE); acetyl-d3 (K)	P26447	1030.56	8
314	A(+42.01)C(+57.02)PLE(+43.04)K(+45.03)ALD(+43.04)V	-	M	ACPLEKALDV	M	Acetylation (Protein N-term); Carbamidomethylation; ethanolamine (DE); acetyl-d3 (K); ethanolamine (DE)	P26447	1287.69	10
315	A(+42.01)C(+57.02)PLE(+43.04)K(+45.03)ALD(+43.04)VM(+15.99)VS	-	M	ACPLEKALDVMVS	T	Acetylation (Protein N-term); Carbamidomethylation; ethanolamine (DE); acetyl-d3 (K); ethanolamine (DE); more	P26447	1620.83	13
316	A(+42.01)C(+57.02)PLE(+43.04)K(+45.03)ALD(+43.04)VM(+15.99)VST	-	M	ACPLEKALDVMVST	F	Acetylation (Protein N-term); Carbamidomethylation; ethanolamine (DE); acetyl-d3 (K); ethanolamine (DE); more	P26447	1721.88	14
317	A(+42.01)C(+57.02)PLE(+43.04)K(+45.03)ALD(+43.04)VM(+15.99)VSTF	-	M	ACPLEKALDVMVSTF	H	Acetylation (Protein N-term); Carbamidomethylation; ethanolamine (DE); acetyl-d3 (K); ethanolamine (DE); more	P26447	1868.95	15
318	A(+42.01)C(+57.02)PLE(+43.04)K(+45.03)ALD(+43.04)VM(+15.99)VSTFH	-	M	ACPLEKALDVMVSTFH	K	Acetylation (Protein N-term); Carbamidomethylation; ethanolamine (DE); acetyl-d3 (K); ethanolamine (DE); more	P26447	2006	16
319	A(+42.01)C(+57.02)PLE(+43.04)K(+45.03)ALD(+43.04)VM(+15.99)VSTFHK(+45.03)YSGK(+45.03)	-	M	ACPLEKALDVMVSTFHKYSGK	E	Acetylation (Protein N-term); Carbamidomethylation; ethanolamine (DE); acetyl-d3 (K); ethanolamine (DE); more	P26447	2659.37	21
320	A(+42.01)C(+57.02)PLE(+43.04)K(+45.03)ALD(+43.04)VMVS	-	M	ACPLEKALDVMVS	T	Acetylation (Protein N-term); Carbamidomethylation; ethanolamine (DE); acetyl-d3 (K); ethanolamine (DE)	P26447	1604.83	13
321	A(+42.01)C(+57.02)PLE(+43.04)K(+45.03)ALD(+43.04)VMVSTF	-	M	ACPLEKALDVMVSTF	H	Acetylation (Protein N-term); Carbamidomethylation; ethanolamine (DE); acetyl-d3 (K); ethanolamine (DE)	P26447	1852.95	15
322	A(+42.01)C(+57.02)PLE(+43.04)K(+45.03)ALDV(+43.04)	-	M	ACPLEKALDV	M	Acetylation (Protein N-term); Carbamidomethylation; ethanolamine (DE); acetyl-d3 (K); ethanolamine (C-term)	P26447	1287.69	10
323	A(+42.01)C(+57.02)PLE(+43.04)K(+45.03)ALDVMVSTF	-	M	ACPLEKALDVMVSTF	H	Acetylation (Protein N-term); Carbamidomethylation; ethanolamine (DE); acetyl-d3 (K)	P26447	1809.91	15
324	A(+42.01)C(+57.02)PLEK(+45.03)ALD(+43.04)V	-	M	ACPLEKALDV	M	Acetylation (Protein N-term); Carbamidomethylation; acetyl-d3 (K); ethanolamine (DE)	P26447	1244.65	10
325	A(+42.01)C(+57.02)PLEK(+45.03)ALD(+43.04)VM(+15.99)VSTF	-	M	ACPLEKALDVMVSTF	H	Acetylation (Protein N-term); Carbamidomethylation; acetyl-d3 (K); ethanolamine (DE); Oxidation (M)	P26447	1825.9	15
326	A(+42.01)C(+57.02)PLEK(+45.03)ALD(+43.04)VMVSTF	-	M	ACPLEKALDVMVSTF	H	Acetylation (Protein N-term); Carbamidomethylation; acetyl-d3 (K); ethanolamine (DE)	P26447	1809.91	15
327	A(+42.01)D(+43.04)AAASPVGK(+45.03)	-	M	ADAAASPVGK	R	Acetylation (Protein N-term); ethanolamine (DE); acetyl-d3 (K)	Q7LBC6	1015.54	10
328	A(+42.01)D(+43.04)AAATAGAGGSGT	-	M	ADAAATAGAGGSGT	R	Acetylation (Protein N-term); ethanolamine (DE)	Q7Z7C8	1161.53	14
329	A(+42.01)D(+43.04)AAPQLGK(+45.03)	-	M	ADAAPQLGK	R	Acetylation (Protein N-term); ethanolamine (DE); acetyl-d3 (K)	Q96C86	999.543	9
330	A(+42.01)D(+43.04)AE(+43.04)VIILPK(+45.03)K(+45.03)HK(+45.03)K(+45.03)K(+45.03)K(+45.03)E(+43.04)	-	M	ADAEVIILPKKHKKKKE	R	Acetylation (Protein N-term); ethanolamine (DE); ethanolamine (DE); acetyl-d3 (K); acetyl-d3 (K); more	O60832	2415.51	17
331	A(+42.01)D(+43.04)D(+43.04)AGAAGGPGGPGGPGM(+15.99)GN	-	M	ADDAGAAGGPGGPGGPGMGN	R	Acetylation (Protein N-term); ethanolamine (DE); ethanolamine (DE); Oxidation (M)	P15880	1725.74	20
332	A(+42.01)D(+43.04)D(+43.04)AGAAGGPGGPGGPGMGN	-	M	ADDAGAAGGPGGPGGPGMGN	R	Acetylation (Protein N-term); ethanolamine (DE); ethanolamine (DE)	P15880	1709.74	20
333	A(+42.01)D(+43.04)D(+43.04)AGAAGGPGGPGGPGMGNRGGFRGGFGS	-	M	ADDAGAAGGPGGPGGPGMGNRGGFRGGFGS	G	Acetylation (Protein N-term); ethanolamine (DE); ethanolamine (DE)	P15880	2688.22	30
334	A(+42.01)D(+43.04)D(+43.04)K(+45.03)D(+43.04)SLPK(+45.03)LK(+45.03)D(+43.04)L	-	M	ADDKDSLPKLKDL	A	Acetylation (Protein N-term); ethanolamine (DE); ethanolamine (DE); acetyl-d3 (K); ethanolamine (DE); more	L0R6Q1	1806.04	13
335	A(+42.01)D(+43.04)D(+43.04)K(+45.03)D(+43.04)SLPK(+45.03)LK(+45.03)DL(+43.04)	-	M	ADDKDSLPKLKDL	A	Acetylation (Protein N-term); ethanolamine (DE); ethanolamine (DE); acetyl-d3 (K); ethanolamine (DE); more	L0R6Q1	1806.04	13
336	A(+42.01)D(+43.04)D(+43.04)LD(+43.04)FE(+43.04)TGD(+43.04)	-，-	M，M	ADDLDFETGD	A，A	Acetylation (Protein N-term); ethanolamine (DE); ethanolamine (DE); ethanolamine (DE); ethanolamine (DE); more	P63241，Q6IS14	1353.64	10
337	A(+42.01)D(+43.04)D(+43.04)LD(+43.04)FE(+43.04)TGD(+43.04)AGA	-，-	M，M	ADDLDFETGDAGA	S，S	Acetylation (Protein N-term); ethanolamine (DE); ethanolamine (DE); ethanolamine (DE); ethanolamine (DE); more	P63241，Q6IS14	1552.74	13
338	A(+42.01)D(+43.04)D(+43.04)LD(+43.04)FE(+43.04)TGD(+43.04)AGAS	-，-	M，M	ADDLDFETGDAGAS	A，A	Acetylation (Protein N-term); ethanolamine (DE); ethanolamine (DE); ethanolamine (DE); ethanolamine (DE); more	P63241，Q6IS14	1639.77	14
339	A(+42.01)D(+43.04)D(+43.04)LD(+43.04)FE(+43.04)TGD(+43.04)AGASA	-，-	M，M	ADDLDFETGDAGASA	T，T	Acetylation (Protein N-term); ethanolamine (DE); ethanolamine (DE); ethanolamine (DE); ethanolamine (DE); more	P63241，Q6IS14	1710.81	15
340	A(+42.01)D(+43.04)D(+43.04)LD(+43.04)FE(+43.04)TGD(+43.04)AGASATFPMQC(+57.02)SAL	-，-	M，M	ADDLDFETGDAGASATFPMQCSAL	R，R	Acetylation (Protein N-term); ethanolamine (DE); ethanolamine (DE); ethanolamine (DE); ethanolamine (DE); more	P63241，Q6IS14	2746.26	24
341	A(+42.01)D(+43.04)D(+43.04)PSAAD(+43.04)RNV	-	M	ADDPSAADRNV	E	Acetylation (Protein N-term); ethanolamine (DE); ethanolamine (DE); ethanolamine (DE)	P62495	1300.64	11
342	A(+42.01)D(+43.04)D(+43.04)VD(+43.04)QQQTTNTVE(+43.04)	-	M	ADDVDQQQTTNTVE	E	Acetylation (Protein N-term); ethanolamine (DE); ethanolamine (DE); ethanolamine (DE); ethanolamine (DE)	P62310	1776.85	14
343	A(+42.01)D(+43.04)DK(+45.03)D(+43.04)SLPK(+45.03)LK(+45.03)D(+43.04)L	-	M	ADDKDSLPKLKDL	A	Acetylation (Protein N-term); ethanolamine (DE); acetyl-d3 (K); ethanolamine (DE); acetyl-d3 (K); more	L0R6Q1	1763	13
344	A(+42.01)D(+43.04)E(+43.04)D(+43.04)GE(+43.04)GIHPSAPH	-	M	ADEDGEGIHPSAPH	R	Acetylation (Protein N-term); ethanolamine (DE); ethanolamine (DE); ethanolamine (DE); ethanolamine (DE)	Q96L92	1644.79	14
345	A(+42.01)D(+43.04)E(+43.04)D(+43.04)GEGIHPSAPH	-	M	ADEDGEGIHPSAPH	R	Acetylation (Protein N-term); ethanolamine (DE); ethanolamine (DE); ethanolamine (DE)	Q96L92	1601.74	14
346	A(+42.01)D(+43.04)E(+43.04)DGE(+43.04)GIHPSAPH	-	M	ADEDGEGIHPSAPH	R	Acetylation (Protein N-term); ethanolamine (DE); ethanolamine (DE); ethanolamine (DE)	Q96L92	1601.74	14
347	A(+42.01)D(+43.04)E(+43.04)E(+43.04)K(+45.03)LPPGWE(+43.04)K(+45.03)	-，-	M，M	ADEEKLPPGWEK	R，R	Acetylation (Protein N-term); ethanolamine (DE); ethanolamine (DE); ethanolamine (DE); acetyl-d3 (K); more	Q13526，O15428	1701.92	12
348	A(+42.01)D(+43.04)E(+43.04)GK(+45.03)SYSE(+43.04)HD(+43.04)DE(+43.04)(+43.04)	-	M	ADEGKSYSEHDDE	R	Acetylation (Protein N-term); ethanolamine (DE); ethanolamine (DE); acetyl-d3 (K); ethanolamine (DE); more	Q9UBU9	1825.85	13
349	A(+42.01)D(+43.04)E(+43.04)IAK(+45.03)AQVA	-	M	ADEIAKAQVA	R	Acetylation (Protein N-term); ethanolamine (DE); ethanolamine (DE); acetyl-d3 (K)	P49773	1187.66	10
350	A(+42.01)D(+43.04)E(+43.04)K(+45.03)PK(+45.03)E(+43.04)GVK(+45.03)T	-	M	ADEKPKEGVKT	E	Acetylation (Protein N-term); ethanolamine (DE); ethanolamine (DE); acetyl-d3 (K); acetyl-d3 (K); more	P61956	1506.86	11
351	A(+42.01)D(+43.04)ED(+43.04)GE(+43.04)GIHPSAPH	-	M	ADEDGEGIHPSAPH	R	Acetylation (Protein N-term); ethanolamine (DE); ethanolamine (DE); ethanolamine (DE)	Q96L92	1601.74	14
352	A(+42.01)D(+43.04)EIAK(+45.03)AQVA	-	M	ADEIAKAQVA	R	Acetylation (Protein N-term); ethanolamine (DE); acetyl-d3 (K)	P49773	1144.62	10
353	A(+42.01)D(+43.04)FD(+43.04)DRVSD(+43.04)E(+43.04)E(+43.04)K(+45.03)V	-	M	ADFDDRVSDEEKV	R	Acetylation (Protein N-term); ethanolamine (DE); ethanolamine (DE); ethanolamine (DE); ethanolamine (DE); more	P52907	1825.92	13
354	A(+42.01)D(+43.04)FD(+43.04)TYD(+43.04)D(+43.04)	-	M	ADFDTYDD	R	Acetylation (Protein N-term); ethanolamine (DE); ethanolamine (DE); ethanolamine (DE); ethanolamine (DE)	Q15056	1174.51	8
355	A(+42.01)D(+43.04)FD(+43.04)TYD(+43.04)D(+43.04)RAY	-	M	ADFDTYDDRAY	S	Acetylation (Protein N-term); ethanolamine (DE); ethanolamine (DE); ethanolamine (DE); ethanolamine (DE)	Q15056	1564.72	11
356	A(+42.01)D(+43.04)FD(+43.04)TYD(+43.04)D(+43.04)RAYSSFGGG	-	M	ADFDTYDDRAYSSFGGG	R	Acetylation (Protein N-term); ethanolamine (DE); ethanolamine (DE); ethanolamine (DE); ethanolamine (DE)	Q15056	2056.91	17
357	A(+42.01)D(+43.04)FD(+43.04)TYD(+43.04)DRAY(+43.04)	-	M	ADFDTYDDRAY	S	Acetylation (Protein N-term); ethanolamine (DE); ethanolamine (DE); ethanolamine (DE); ethanolamine (C-term)	Q15056	1564.72	11
358	A(+42.01)D(+43.04)FD(+43.04)TYD(+43.04)DRAYSSFGGG	-	M	ADFDTYDDRAYSSFGGG	R	Acetylation (Protein N-term); ethanolamine (DE); ethanolamine (DE); ethanolamine (DE)	Q15056	2013.87	17
359	A(+42.01)D(+43.04)FD(+43.04)TYDD(+43.04)(+43.04)	-	M	ADFDTYDD	R	Acetylation (Protein N-term); ethanolamine (DE); ethanolamine (DE); ethanolamine (C-term); ethanolamine (DE)	Q15056	1174.51	8
360	A(+42.01)D(+43.04)FD(+43.04)TYDD(+43.04)R	-	M	ADFDTYDDR	A	Acetylation (Protein N-term); ethanolamine (DE); ethanolamine (DE); ethanolamine (DE)	Q15056	1287.57	9
361	A(+42.01)D(+43.04)FD(+43.04)TYDD(+43.04)RAY	-	M	ADFDTYDDRAY	S	Acetylation (Protein N-term); ethanolamine (DE); ethanolamine (DE); ethanolamine (DE)	Q15056	1521.67	11
362	A(+42.01)D(+43.04)FD(+43.04)TYDD(+43.04)RAYSSFGGG	-	M	ADFDTYDDRAYSSFGGG	R	Acetylation (Protein N-term); ethanolamine (DE); ethanolamine (DE); ethanolamine (DE)	Q15056	2013.87	17
363	A(+42.01)D(+43.04)FDD(+43.04)RVSD(+43.04)E(+43.04)E(+43.04)K(+45.03)V	-	M	ADFDDRVSDEEKV	R	Acetylation (Protein N-term); ethanolamine (DE); ethanolamine (DE); ethanolamine (DE); ethanolamine (DE); more	P52907	1825.92	13
364	A(+42.01)D(+43.04)FLK(+45.03)GLPVYNK(+45.03)SNFS	-	M	ADFLKGLPVYNKSNFS	R	Acetylation (Protein N-term); ethanolamine (DE); acetyl-d3 (K); acetyl-d3 (K)	Q9BW61	1974.04	16
365	A(+42.01)D(+43.04)GE(+43.04)E(+43.04)PE(+43.04)K(+45.03)K(+45.03)	-	M	ADGEEPEKK	R	Acetylation (Protein N-term); ethanolamine (DE); ethanolamine (DE); ethanolamine (DE); ethanolamine (DE); more	Q8TBC4	1305.7	9
366	A(+42.01)D(+43.04)GGGPK(+45.03)D(+43.04)APSL	-	M	ADGGGPKDAPSL	R	Acetylation (Protein N-term); ethanolamine (DE); acetyl-d3 (K); ethanolamine (DE)	Q9H330	1256.64	12
367	A(+42.01)D(+43.04)GK(+45.03)AGD(+43.04)E(+43.04)K(+45.03)PE(+43.04)K(+45.03)SQ	-	M	ADGKAGDEKPEKSQ	R	Acetylation (Protein N-term); ethanolamine (DE); acetyl-d3 (K); ethanolamine (DE); ethanolamine (DE); more	Q8WW12	1807.96	14
368	A(+42.01)D(+43.04)GK(+45.03)AGD(+43.04)E(+43.04)K(+45.03)PEK(+45.03)SQ(+43.04)	-	M	ADGKAGDEKPEKSQ	R	Acetylation (Protein N-term); ethanolamine (DE); acetyl-d3 (K); ethanolamine (DE); ethanolamine (DE); more	Q8WW12	1807.96	14
369	A(+42.01)D(+43.04)GK(+45.03)AGDE(+43.04)K(+45.03)PE(+43.04)K(+45.03)SQ	-	M	ADGKAGDEKPEKSQ	R	Acetylation (Protein N-term); ethanolamine (DE); acetyl-d3 (K); ethanolamine (DE); acetyl-d3 (K); more	Q8WW12	1764.92	14
370	A(+42.01)D(+43.04)GQM(+15.99)PFSC(+57.02)HYPS	-	M	ADGQMPFSCHYPS	R	Acetylation (Protein N-term); ethanolamine (DE); Oxidation (M); Carbamidomethylation	Q9UJY1	1596.63	13
371	A(+42.01)D(+43.04)GQVAE(+43.04)LLL	-	M	ADGQVAELLL	R	Acetylation (Protein N-term); ethanolamine (DE); ethanolamine (DE)	Q9Y285	1155.65	10
372	A(+42.01)D(+43.04)K(+45.03)E(+43.04)AAFD(+43.04)D(+43.04)AVE(+43.04)	-	M	ADKEAAFDDAVE	E	Acetylation (Protein N-term); ethanolamine (DE); acetyl-d3 (K); ethanolamine (DE); ethanolamine (DE); more	Q09028	1581.81	12
373	A(+42.01)D(+43.04)K(+45.03)E(+43.04)AAFD(+43.04)D(+43.04)AVE(+43.04)E	-	M	ADKEAAFDDAVEE	R	Acetylation (Protein N-term); ethanolamine (DE); acetyl-d3 (K); ethanolamine (DE); ethanolamine (DE); more	Q09028	1710.85	13
374	A(+42.01)D(+43.04)K(+45.03)E(+43.04)AAFD(+43.04)D(+43.04)AVEE(+43.04)	-	M	ADKEAAFDDAVEE	R	Acetylation (Protein N-term); ethanolamine (DE); acetyl-d3 (K); ethanolamine (DE); ethanolamine (DE); more	Q09028	1710.85	13
375	A(+42.01)D(+43.04)K(+45.03)E(+43.04)AAFD(+43.04)D(+43.04)AVEE(+43.04)(+43.04)	-	M	ADKEAAFDDAVEE	R	Acetylation (Protein N-term); ethanolamine (DE); acetyl-d3 (K); ethanolamine (DE); ethanolamine (DE); more	Q09028	1753.89	13
376	A(+42.01)D(+43.04)K(+45.03)E(+43.04)AAFD(+43.04)DAVEE(+43.04)(+43.04)	-	M	ADKEAAFDDAVEE	R	Acetylation (Protein N-term); ethanolamine (DE); acetyl-d3 (K); ethanolamine (DE); ethanolamine (DE); more	Q09028	1710.85	13
377	A(+42.01)D(+43.04)K(+45.03)E(+43.04)AAFDD(+43.04)AVE(+43.04)E(+43.04)	-	M	ADKEAAFDDAVEE	R	Acetylation (Protein N-term); ethanolamine (DE); acetyl-d3 (K); ethanolamine (DE); ethanolamine (DE); more	Q09028	1710.85	13
378	A(+42.01)D(+43.04)K(+45.03)E(+43.04)AAFDD(+43.04)AVEE(+43.04)(+43.04)	-	M	ADKEAAFDDAVEE	R	Acetylation (Protein N-term); ethanolamine (DE); acetyl-d3 (K); ethanolamine (DE); ethanolamine (DE); more	Q09028	1710.85	13
379	A(+42.01)D(+43.04)K(+45.03)E(+43.04)K(+45.03)K(+45.03)K(+45.03)K(+45.03)	-	M	ADKEKKKK	E	Acetylation (Protein N-term); ethanolamine (DE); acetyl-d3 (K); ethanolamine (DE); acetyl-d3 (K); more	Q9UK45	1326.83	8
380	A(+42.01)D(+43.04)K(+45.03)E(+43.04)K(+45.03)K(+45.03)K(+45.03)K(+45.03)E(+43.04)SILD(+43.04)LSK(+45.03)YID(+43.04)K(+45.03)TI	-	M	ADKEKKKKESILDLSKYIDKTI	R	Acetylation (Protein N-term); ethanolamine (DE); acetyl-d3 (K); ethanolamine (DE); acetyl-d3 (K); more	Q9UK45	3164.9	22
381	A(+42.01)D(+43.04)K(+45.03)EAAFD(+43.04)D(+43.04)AVE(+43.04)E(+43.04)	-	M	ADKEAAFDDAVEE	R	Acetylation (Protein N-term); ethanolamine (DE); acetyl-d3 (K); ethanolamine (DE); ethanolamine (DE); more	Q09028	1710.85	13
382	A(+42.01)D(+43.04)K(+45.03)EAAFD(+43.04)D(+43.04)AVEE(+43.04)(+43.04)	-	M	ADKEAAFDDAVEE	R	Acetylation (Protein N-term); ethanolamine (DE); acetyl-d3 (K); ethanolamine (DE); ethanolamine (DE); more	Q09028	1710.85	13
383	A(+42.01)D(+43.04)K(+45.03)M(+15.99)D(+43.04)M(+15.99)SLD(+43.04)DIIK(+45.03)LN	-	M	ADKMDMSLDDIIKLN	R	Acetylation (Protein N-term); ethanolamine (DE); acetyl-d3 (K); Oxidation (M); ethanolamine (DE); more	Q86V81	2014.02	15
384	A(+42.01)D(+43.04)K(+45.03)M(+15.99)D(+43.04)M(+15.99)SLDD(+43.04)IIK(+45.03)LN	-	M	ADKMDMSLDDIIKLN	R	Acetylation (Protein N-term); ethanolamine (DE); acetyl-d3 (K); Oxidation (M); ethanolamine (DE); more	Q86V81	2014.02	15
385	A(+42.01)D(+43.04)K(+45.03)M(+15.99)D(+43.04)MSLD(+43.04)D(+43.04)IIK(+45.03)LN	-	M	ADKMDMSLDDIIKLN	R	Acetylation (Protein N-term); ethanolamine (DE); acetyl-d3 (K); Oxidation (M); ethanolamine (DE); more	Q86V81	2041.07	15
386	A(+42.01)D(+43.04)K(+45.03)MD(+43.04)M(+15.99)SLD(+43.04)D(+43.04)IIK(+45.03)LN	-	M	ADKMDMSLDDIIKLN	R	Acetylation (Protein N-term); ethanolamine (DE); acetyl-d3 (K); ethanolamine (DE); Oxidation (M); more	Q86V81	2041.07	15
387	A(+42.01)D(+43.04)K(+45.03)MD(+43.04)M(+15.99)SLDD(+43.04)IIK(+45.03)LN	-	M	ADKMDMSLDDIIKLN	R	Acetylation (Protein N-term); ethanolamine (DE); acetyl-d3 (K); ethanolamine (DE); Oxidation (M); more	Q86V81	1998.03	15
388	A(+42.01)D(+43.04)K(+45.03)MD(+43.04)MSLD(+43.04)D(+43.04)IIK(+45.03)LN	-	M	ADKMDMSLDDIIKLN	R	Acetylation (Protein N-term); ethanolamine (DE); acetyl-d3 (K); ethanolamine (DE); ethanolamine (DE); more	Q86V81	2025.08	15
389	A(+42.01)D(+43.04)K(+45.03)PD(+43.04)M(+15.99)GE(+43.04)IASF	-	M	ADKPDMGEIASF	D	Acetylation (Protein N-term); ethanolamine (DE); acetyl-d3 (K); ethanolamine (DE); Oxidation (M); more	P63313	1511.74	12
390	A(+42.01)D(+43.04)K(+45.03)PD(+43.04)M(+15.99)GE(+43.04)IASFD(+43.04)	-	M	ADKPDMGEIASFD	K	Acetylation (Protein N-term); ethanolamine (DE); acetyl-d3 (K); ethanolamine (DE); Oxidation (M); more	P63313	1669.81	13
391	A(+42.01)D(+43.04)K(+45.03)PD(+43.04)M(+15.99)GE(+43.04)IASFD(+43.04)K(+45.03)	-	M	ADKPDMGEIASFDK	A	Acetylation (Protein N-term); ethanolamine (DE); acetyl-d3 (K); ethanolamine (DE); Oxidation (M); more	P63313	1842.93	14
392	A(+42.01)D(+43.04)K(+45.03)PD(+43.04)M(+15.99)GE(+43.04)IASFD(+43.04)K(+45.03)AK(+45.03)	-	M	ADKPDMGEIASFDKAK	L	Acetylation (Protein N-term); ethanolamine (DE); acetyl-d3 (K); ethanolamine (DE); Oxidation (M); more	P63313	2087.09	16
393	A(+42.01)D(+43.04)K(+45.03)PD(+43.04)M(+15.99)GE(+43.04)IASFD(+43.04)K(+45.03)AK(+45.03)L	-	M	ADKPDMGEIASFDKAKL	K	Acetylation (Protein N-term); ethanolamine (DE); acetyl-d3 (K); ethanolamine (DE); Oxidation (M); more	P63313	2200.18	17
394	A(+42.01)D(+43.04)K(+45.03)PD(+43.04)M(+15.99)GE(+43.04)IASFD(+43.04)K(+45.03)AK(+45.03)LK(+45.03)K(+45.03)T	-	M	ADKPDMGEIASFDKAKLKKT	E	Acetylation (Protein N-term); ethanolamine (DE); acetyl-d3 (K); ethanolamine (DE); Oxidation (M); more	P63313	2647.47	20
395	A(+42.01)D(+43.04)K(+45.03)PD(+43.04)MGE(+43.04)IASFD(+43.04)K(+45.03)	-	M	ADKPDMGEIASFDK	A	Acetylation (Protein N-term); ethanolamine (DE); acetyl-d3 (K); ethanolamine (DE); ethanolamine (DE); more	P63313	1826.94	14
396	A(+42.01)D(+43.04)K(+45.03)PD(+43.04)MGE(+43.04)IASFD(+43.04)K(+45.03)AK(+45.03)LK(+45.03)K(+45.03)T	-	M	ADKPDMGEIASFDKAKLKKT	E	Acetylation (Protein N-term); ethanolamine (DE); acetyl-d3 (K); ethanolamine (DE); ethanolamine (DE); more	P63313	2631.48	20
397	A(+42.01)D(+43.04)K(+45.03)PDM(+15.99)GE(+43.04)IASFD(+43.04)K(+45.03)	-	M	ADKPDMGEIASFDK	A	Acetylation (Protein N-term); ethanolamine (DE); acetyl-d3 (K); Oxidation (M); ethanolamine (DE); more	P63313	1799.89	14
398	A(+42.01)D(+43.04)K(+45.03)TPGGSQK(+45.03)ASSK(+45.03)T	-	M	ADKTPGGSQKASSKT	R	Acetylation (Protein N-term); ethanolamine (DE); acetyl-d3 (K); acetyl-d3 (K); acetyl-d3 (K)	O15042	1681.88	15
399	A(+42.01)D(+43.04)K(+45.03)VLK(+45.03)EK(+45.03)(+43.04)	-，-，-	M，M，M	ADKVLKEK	R，R，R	Acetylation (Protein N-term); ethanolamine (DE); acetyl-d3 (K); acetyl-d3 (K); acetyl-d3 (K); more	Q5EG05，Q5XLA6，P29466	1192.74	8
400	A(+42.01)D(+43.04)LE(+43.04)E(+43.04)QLSD(+43.04)EE(+43.04)K(+45.03)V	-	M	ADLEEQLSDEEKV	R	Acetylation (Protein N-term); ethanolamine (DE); ethanolamine (DE); ethanolamine (DE); ethanolamine (DE); more	P47755	1805.94	13
401	A(+42.01)D(+43.04)LLGSILSSM(+15.99)E(+43.04)K(+45.03)PPSLGD(+43.04)QE(+43.04)T	-	M	ADLLGSILSSMEKPPSLGDQET	R	Acetylation (Protein N-term); ethanolamine (DE); Oxidation (M); ethanolamine (DE); acetyl-d3 (K); more	O75391	2562.33	22
402	A(+42.01)D(+43.04)LLGSILSSME(+43.04)K(+45.03)PPSLGD(+43.04)QE(+43.04)T	-	M	ADLLGSILSSMEKPPSLGDQET	R	Acetylation (Protein N-term); ethanolamine (DE); ethanolamine (DE); acetyl-d3 (K); ethanolamine (DE); more	O75391	2546.33	22
403	A(+42.01)D(+43.04)M(+15.99)QNLVE(+43.04)	-	M	ADMQNLVE	R	Acetylation (Protein N-term); ethanolamine (DE); Oxidation (M); ethanolamine (DE)	Q01518	1062.5	8
404	A(+42.01)D(+43.04)MQNLVE(+43.04)	-	M	ADMQNLVE	R	Acetylation (Protein N-term); ethanolamine (DE); ethanolamine (DE)	Q01518	1046.51	8
405	A(+42.01)D(+43.04)NFSLHD(+43.04)AL	-	M	ADNFSLHDAL	S	Acetylation (Protein N-term); ethanolamine (DE); ethanolamine (DE)	P17931	1229.6	10
406	A(+42.01)D(+43.04)PD(+43.04)VLTE(+43.04)VPAALK(+45.03)	-	M	ADPDVLTEVPAALK	R	Acetylation (Protein N-term); ethanolamine (DE); ethanolamine (DE); ethanolamine (DE); acetyl-d3 (K)	P29083	1653.94	14
407	A(+42.01)D(+43.04)PK(+45.03)YAD(+43.04)LPGIA	-	M	ADPKYADLPGIA	R	Acetylation (Protein N-term); ethanolamine (DE); acetyl-d3 (K); ethanolamine (DE)	Q13561	1402.75	12
408	A(+42.01)D(+43.04)PRD(+43.04)K(+45.03)ALQD(+43.04)Y	-	M	ADPRDKALQDY	R	Acetylation (Protein N-term); ethanolamine (DE); ethanolamine (DE); acetyl-d3 (K); ethanolamine (DE)	P62333	1506.79	11
409	A(+42.01)D(+43.04)PRDK(+45.03)ALQD(+43.04)Y	-	M	ADPRDKALQDY	R	Acetylation (Protein N-term); ethanolamine (DE); acetyl-d3 (K); ethanolamine (DE)	P62333	1463.74	11
410	A(+42.01)D(+43.04)PRDK(+45.03)ALQDY(+43.04)	-	M	ADPRDKALQDY	R	Acetylation (Protein N-term); ethanolamine (DE); acetyl-d3 (K); ethanolamine (C-term)	P62333	1463.74	11
411	A(+42.01)D(+43.04)QLTE(+43.04)E(+43.04)QIA	-，-，-	M，M，M	ADQLTEEQIA	E，E，E	Acetylation (Protein N-term); ethanolamine (DE); ethanolamine (DE); ethanolamine (DE)	P0DP24，P0DP25，P0DP23	1287.67	10
412	A(+42.01)D(+43.04)QLTE(+43.04)E(+43.04)QIAE(+43.04)	-，-，-	M，M，M	ADQLTEEQIAE	F，F，F	Acetylation (Protein N-term); ethanolamine (DE); ethanolamine (DE); ethanolamine (DE); ethanolamine (DE)	P0DP24，P0DP25，P0DP23	1459.75	11
413	A(+42.01)D(+43.04)QLTE(+43.04)E(+43.04)QIAE(+43.04)FK(+45.03)	-，-，-	M，M，M	ADQLTEEQIAEFK	E，E，E	Acetylation (Protein N-term); ethanolamine (DE); ethanolamine (DE); ethanolamine (DE); ethanolamine (DE); more	P0DP24，P0DP25，P0DP23	1779.94	13
414	A(+42.01)D(+43.04)QLTE(+43.04)E(+43.04)QIAE(+43.04)FK(+45.03)E(+43.04)	-，-，-	M，M，M	ADQLTEEQIAEFKE	A，A，A	Acetylation (Protein N-term); ethanolamine (DE); ethanolamine (DE); ethanolamine (DE); ethanolamine (DE); more	P0DP24，P0DP25，P0DP23	1952.03	14
415	A(+42.01)D(+43.04)QLTE(+43.04)E(+43.04)QIAE(+43.04)FK(+45.03)E(+43.04)A	-，-，-	M，M，M	ADQLTEEQIAEFKEA	F，F，F	Acetylation (Protein N-term); ethanolamine (DE); ethanolamine (DE); ethanolamine (DE); ethanolamine (DE); more	P0DP24，P0DP25，P0DP23	2023.07	15
416	A(+42.01)D(+43.04)QLTE(+43.04)E(+43.04)QIAE(+43.04)FK(+45.03)E(+43.04)AF	-，-，-	M，M，M	ADQLTEEQIAEFKEAF	S，S，S	Acetylation (Protein N-term); ethanolamine (DE); ethanolamine (DE); ethanolamine (DE); ethanolamine (DE); more	P0DP24，P0DP25，P0DP23	2170.13	16
417	A(+42.01)D(+43.04)QLTE(+43.04)E(+43.04)QIAE(+43.04)FK(+45.03)EA(+43.04)	-，-，-	M，M，M	ADQLTEEQIAEFKEA	F，F，F	Acetylation (Protein N-term); ethanolamine (DE); ethanolamine (DE); ethanolamine (DE); ethanolamine (DE); more	P0DP24，P0DP25，P0DP23	2023.07	15
418	A(+42.01)D(+43.04)QLTE(+43.04)E(+43.04)QIAE(+43.04)FK(+45.03)EAF(+43.04)	-，-，-	M，M，M	ADQLTEEQIAEFKEAF	S，S，S	Acetylation (Protein N-term); ethanolamine (DE); ethanolamine (DE); ethanolamine (DE); ethanolamine (DE); more	P0DP24，P0DP25，P0DP23	2170.13	16
419	A(+42.01)D(+43.04)QLTEE(+43.04)QIAE(+43.04)FK(+45.03)E(+43.04)AF	-，-，-	M，M，M	ADQLTEEQIAEFKEAF	S，S，S	Acetylation (Protein N-term); ethanolamine (DE); ethanolamine (DE); ethanolamine (DE); acetyl-d3 (K); more	P0DP24，P0DP25，P0DP23	2127.09	16
420	A(+42.01)D(+43.04)SE(+43.04)LQLVE(+43.04)Q	-	M	ADSELQLVEQ	R	Acetylation (Protein N-term); ethanolamine (DE); ethanolamine (DE); ethanolamine (DE)	P07741	1301.68	10
421	A(+42.01)D(+43.04)SE(+43.04)LQLVEQ(+43.04)	-	M	ADSELQLVEQ	R	Acetylation (Protein N-term); ethanolamine (DE); ethanolamine (DE); ethanolamine (C-term)	P07741	1301.68	10
422	A(+42.01)D(+43.04)SELQLVE(+43.04)Q	-	M	ADSELQLVEQ	R	Acetylation (Protein N-term); ethanolamine (DE); ethanolamine (DE)	P07741	1258.64	10
423	A(+42.01)D(+43.04)SVK(+45.03)TFLQD(+43.04)LA	-	M	ADSVKTFLQDLA	R	Acetylation (Protein N-term); ethanolamine (DE); acetyl-d3 (K); ethanolamine (DE)	O14681	1479.8	12
424	A(+42.01)D(+43.04)VLD(+43.04)LHE(+43.04)AGG	-	M	ADVLDLHEAGG	E	Acetylation (Protein N-term); ethanolamine (DE); ethanolamine (DE); ethanolamine (DE)	Q9Y5S9	1266.66	11
425	A(+42.01)D(+43.04)VLD(+43.04)LHE(+43.04)AGGE(+43.04)D(+43.04)F	-	M	ADVLDLHEAGGEDF	A	Acetylation (Protein N-term); ethanolamine (DE); ethanolamine (DE); ethanolamine (DE); ethanolamine (DE); more	Q9Y5S9	1743.88	14
426	A(+42.01)D(+43.04)VLD(+43.04)LHE(+43.04)AGGE(+43.04)DF(+43.04)	-	M	ADVLDLHEAGGEDF	A	Acetylation (Protein N-term); ethanolamine (DE); ethanolamine (DE); ethanolamine (DE); ethanolamine (DE); more	Q9Y5S9	1743.88	14
427	A(+42.01)D(+43.04)VVVGK(+45.03)D(+43.04)K(+45.03)GG	-	M	ADVVVGKDKGG	E	Acetylation (Protein N-term); ethanolamine (DE); acetyl-d3 (K); ethanolamine (DE); acetyl-d3 (K)	Q9NRG0	1261.71	11
428	A(+42.01)D(+43.04)VVVGK(+45.03)D(+43.04)K(+45.03)GGE(+43.04)Q	-	M	ADVVVGKDKGGEQ	R	Acetylation (Protein N-term); ethanolamine (DE); acetyl-d3 (K); ethanolamine (DE); acetyl-d3 (K); more	Q9NRG0	1561.86	13
429	A(+42.01)D(+43.04)VVVGK(+45.03)D(+43.04)K(+45.03)GGEQ	-	M	ADVVVGKDKGGEQ	R	Acetylation (Protein N-term); ethanolamine (DE); acetyl-d3 (K); ethanolamine (DE); acetyl-d3 (K)	Q9NRG0	1518.82	13
430	A(+42.01)D(+43.04)VVVGK(+45.03)DK(+45.03)GGE(+43.04)Q	-	M	ADVVVGKDKGGEQ	R	Acetylation (Protein N-term); ethanolamine (DE); acetyl-d3 (K); acetyl-d3 (K); ethanolamine (DE)	Q9NRG0	1518.82	13
431	A(+42.01)DD(+43.04)LD(+43.04)FE(+43.04)TGD(+43.04)AGAS	-，-	M，M	ADDLDFETGDAGAS	A，A	Acetylation (Protein N-term); ethanolamine (DE); ethanolamine (DE); ethanolamine (DE); ethanolamine (DE)	P63241，Q6IS14	1596.73	14
432	A(+42.01)DE(+43.04)IAK(+45.03)AQVA	-	M	ADEIAKAQVA	R	Acetylation (Protein N-term); ethanolamine (DE); acetyl-d3 (K)	P49773	1144.62	10
433	A(+42.01)DGK(+45.03)AGD(+43.04)E(+43.04)K(+45.03)PE(+43.04)K(+45.03)SQ	-	M	ADGKAGDEKPEKSQ	R	Acetylation (Protein N-term); acetyl-d3 (K); ethanolamine (DE); ethanolamine (DE); acetyl-d3 (K); more	Q8WW12	1764.92	14
434	A(+42.01)DGQVAE(+43.04)LLL	-	M	ADGQVAELLL	R	Acetylation (Protein N-term); ethanolamine (DE)	Q9Y285	1112.61	10
435	A(+42.01)DK(+45.03)E(+43.04)AAFD(+43.04)D(+43.04)AVEE(+43.04)(+43.04)	-	M	ADKEAAFDDAVEE	R	Acetylation (Protein N-term); acetyl-d3 (K); ethanolamine (DE); ethanolamine (DE); ethanolamine (DE); more	Q09028	1710.85	13
436	A(+42.01)DK(+45.03)TPGGSQK(+45.03)ASSK(+45.03)T	-	M	ADKTPGGSQKASSKT	R	Acetylation (Protein N-term); acetyl-d3 (K); acetyl-d3 (K); acetyl-d3 (K)	O15042	1638.84	15
437	A(+42.01)DQLTE(+43.04)E(+43.04)QIAE(+43.04)FK(+45.03)E(+43.04)AF	-，-，-	M，M，M	ADQLTEEQIAEFKEAF	S，S，S	Acetylation (Protein N-term); ethanolamine (DE); ethanolamine (DE); ethanolamine (DE); acetyl-d3 (K); more	P0DP24，P0DP25，P0DP23	2127.09	16
438	A(+42.01)DQLTE(+43.04)E(+43.04)QIAE(+43.04)FK(+45.03)EAF(+43.04)	-，-，-	M，M，M	ADQLTEEQIAEFKEAF	S，S，S	Acetylation (Protein N-term); ethanolamine (DE); ethanolamine (DE); ethanolamine (DE); acetyl-d3 (K); more	P0DP24，P0DP25，P0DP23	2127.09	16
439	A(+42.01)DSE(+43.04)LQLVE(+43.04)Q	-	M	ADSELQLVEQ	R	Acetylation (Protein N-term); ethanolamine (DE); ethanolamine (DE)	P07741	1258.64	10
440	A(+42.01)DVVVGK(+45.03)D(+43.04)K(+45.03)GGE(+43.04)Q	-	M	ADVVVGKDKGGEQ	R	Acetylation (Protein N-term); acetyl-d3 (K); ethanolamine (DE); acetyl-d3 (K); ethanolamine (DE)	Q9NRG0	1518.82	13
441	A(+42.01)E(+43.04)AALLLLPE(+43.04)AAAE(+43.04)	-	M	AEAALLLLPEAAAE	R	Acetylation (Protein N-term); ethanolamine (DE); ethanolamine (DE); ethanolamine (DE)	Q96JB2	1551.89	14
442	A(+42.01)E(+43.04)AE(+43.04)E(+43.04)SPGD(+43.04)PGTASP	-	M	AEAEESPGDPGTASP	R	Acetylation (Protein N-term); ethanolamine (DE); ethanolamine (DE); ethanolamine (DE); ethanolamine (DE)	Q96EC8	1627.77	15
443	A(+42.01)E(+43.04)AE(+43.04)GVPTTPGPASGSTF	-	M	AEAEGVPTTPGPASGSTF	R	Acetylation (Protein N-term); ethanolamine (DE); ethanolamine (DE)	Q86VR2	1802.87	18
444	A(+42.01)E(+43.04)AGAGLSE(+43.04)TVTE(+43.04)TTVTVTTE(+43.04)PE(+43.04)N	-	M	AEAGAGLSETVTETTVTVTTEPEN	R	Acetylation (Protein N-term); ethanolamine (DE); ethanolamine (DE); ethanolamine (DE); ethanolamine (DE); more	O60927	2663.35	24
445	A(+42.01)E(+43.04)AGAGLSE(+43.04)TVTE(+43.04)TTVTVTTE(+43.04)PEN(+43.04)	-	M	AEAGAGLSETVTETTVTVTTEPEN	R	Acetylation (Protein N-term); ethanolamine (DE); ethanolamine (DE); ethanolamine (DE); ethanolamine (DE); more	O60927	2663.35	24
446	A(+42.01)E(+43.04)ASAAGAD(+43.04)SGAAVAAH	-	M	AEASAAGADSGAAVAAH	R	Acetylation (Protein N-term); ethanolamine (DE); ethanolamine (DE)	Q9Y4L5	1553.74	17
447	A(+42.01)E(+43.04)ASSANLGSGC(+57.02)E(+43.04)E(+43.04)K(+45.03)	-	M	AEASSANLGSGCEEK	R	Acetylation (Protein N-term); ethanolamine (DE); Carbamidomethylation; ethanolamine (DE); ethanolamine (DE); more	Q6P1K2	1724.81	15
448	A(+42.01)E(+43.04)AVFHAPK(+45.03)	-	M	AEAVFHAPK	R	Acetylation (Protein N-term); ethanolamine (DE); acetyl-d3 (K)	Q8NCE0	1098.59	9
449	A(+42.01)E(+43.04)D(+43.04)M(+15.99)E(+43.04)TK(+45.03)IK(+45.03)NYK(+45.03)TAPFD(+43.04)S	-	M	AEDMETKIKNYKTAPFDS	R	Acetylation (Protein N-term); ethanolamine (DE); ethanolamine (DE); Oxidation (M); ethanolamine (DE); more	P14854	2452.25	18
450	A(+42.01)E(+43.04)D(+43.04)M(+15.99)E(+43.04)TK(+45.03)IK(+45.03)NYK(+45.03)TAPFDS(+43.04)	-	M	AEDMETKIKNYKTAPFDS	R	Acetylation (Protein N-term); ethanolamine (DE); ethanolamine (DE); Oxidation (M); ethanolamine (DE); more	P14854	2452.25	18
451	A(+42.01)E(+43.04)D(+43.04)ME(+43.04)TK(+45.03)IK(+45.03)NYK(+45.03)TAPFD(+43.04)S	-	M	AEDMETKIKNYKTAPFDS	R	Acetylation (Protein N-term); ethanolamine (DE); ethanolamine (DE); ethanolamine (DE); acetyl-d3 (K); more	P14854	2436.26	18
452	A(+42.01)E(+43.04)D(+43.04)ME(+43.04)TK(+45.03)IK(+45.03)NYK(+45.03)TAPFDS(+43.04)	-	M	AEDMETKIKNYKTAPFDS	R	Acetylation (Protein N-term); ethanolamine (DE); ethanolamine (DE); ethanolamine (DE); acetyl-d3 (K); more	P14854	2436.26	18
453	A(+42.01)E(+43.04)E(+43.04)GIAAGGVM(+15.99)	-	M	AEEGIAAGGVM	D	Acetylation (Protein N-term); ethanolamine (DE); ethanolamine (DE); Oxidation (M)	P25398	1147.55	11
454	A(+42.01)E(+43.04)E(+43.04)GIAAGGVM(+15.99)D(+43.04)	-	M	AEEGIAAGGVMD	V	Acetylation (Protein N-term); ethanolamine (DE); ethanolamine (DE); Oxidation (M); ethanolamine (DE)	P25398	1305.62	12
455	A(+42.01)E(+43.04)E(+43.04)GIAAGGVM(+15.99)D(+43.04)VNT	-	M	AEEGIAAGGVMDVNT	A	Acetylation (Protein N-term); ethanolamine (DE); ethanolamine (DE); Oxidation (M); ethanolamine (DE)	P25398	1619.78	15
456	A(+42.01)E(+43.04)EGIAAGGVM(+15.99)D(+43.04)VNTALQ	-	M	AEEGIAAGGVMDVNTALQ	E	Acetylation (Protein N-term); ethanolamine (DE); Oxidation (M); ethanolamine (DE)	P25398	1888.92	18
457	A(+42.01)E(+43.04)GGAAD(+43.04)LD(+43.04)TQ	-	M	AEGGAADLDTQ	R	Acetylation (Protein N-term); ethanolamine (DE); ethanolamine (DE); ethanolamine (DE)	Q9Y4E8	1217.59	11
458	A(+42.01)E(+43.04)GSAVSD(+43.04)PQHAA	-	M	AEGSAVSDPQHAA	R	Acetylation (Protein N-term); ethanolamine (DE); ethanolamine (DE)	Q9H2C0	1366.65	13
459	A(+42.01)E(+43.04)ISD(+43.04)LD(+43.04)RQIE(+43.04)QL	-	M	AEISDLDRQIEQL	R	Acetylation (Protein N-term); ethanolamine (DE); ethanolamine (DE); ethanolamine (DE); ethanolamine (DE)	P60510	1742.95	13
460	A(+42.01)E(+43.04)K(+45.03)FD(+43.04)C(+57.02)HYC(+57.02)	-	M	AEKFDCHYC	R	Acetylation (Protein N-term); ethanolamine (DE); acetyl-d3 (K); ethanolamine (DE); Carbamidomethylation; more	Q13642	1401.59	9
461	A(+42.01)E(+43.04)K(+45.03)FDC(+57.02)HYC(+57.02)	-	M	AEKFDCHYC	R	Acetylation (Protein N-term); ethanolamine (DE); acetyl-d3 (K); Carbamidomethylation; Carbamidomethylation	Q13642	1358.55	9
462	A(+42.01)E(+43.04)K(+45.03)TQK(+45.03)SVK(+45.03)IAPGAVVC(+57.02)VE(+43.04)SEI(+43.04)	-	M	AEKTQKSVKIAPGAVVCVESEI	R	Acetylation (Protein N-term); ethanolamine (DE); acetyl-d3 (K); acetyl-d3 (K); acetyl-d3 (K); more	O00399	2648.48	22
463	A(+42.01)E(+43.04)K(+45.03)TQK(+45.03)SVK(+45.03)IAPGAVVC(+57.02)VESE(+43.04)I(+43.04)	-	M	AEKTQKSVKIAPGAVVCVESEI	R	Acetylation (Protein N-term); ethanolamine (DE); acetyl-d3 (K); acetyl-d3 (K); acetyl-d3 (K); more	O00399	2648.48	22
464	A(+42.01)E(+43.04)LD(+43.04)IGQHC(+57.02)QVE(+43.04)HC(+57.02)	-	M	AELDIGQHCQVEHC	R	Acetylation (Protein N-term); ethanolamine (DE); ethanolamine (DE); Carbamidomethylation; ethanolamine (DE); more	Q8TCF1	1865.85	14
465	A(+42.01)E(+43.04)LD(+43.04)LM(+15.99)APGPLP	-	M	AELDLMAPGPLP	R	Acetylation (Protein N-term); ethanolamine (DE); ethanolamine (DE); Oxidation (M)	O95361	1366.72	12
466	A(+42.01)E(+43.04)LGAGGD(+43.04)GH	-	M	AELGAGGDGH	R	Acetylation (Protein N-term); ethanolamine (DE); ethanolamine (DE)	Q14244	1010.48	10
467	A(+42.01)E(+43.04)LGAGGDGH	-	M	AELGAGGDGH	R	Acetylation (Protein N-term); ethanolamine (DE)	Q14244	967.436	10
468	A(+42.01)E(+43.04)LGE(+43.04)AD(+43.04)E(+43.04)AE(+43.04)LQ	-	M	AELGEADEAELQ	R	Acetylation (Protein N-term); ethanolamine (DE); ethanolamine (DE); ethanolamine (DE); ethanolamine (DE); more	Q9Y5J9	1530.79	12
469	A(+42.01)E(+43.04)LIQK(+45.03)K(+45.03)LQ	-	M	AELIQKKLQ	G	Acetylation (Protein N-term); ethanolamine (DE); acetyl-d3 (K); acetyl-d3 (K)	O15212	1244.76	9
470	A(+42.01)E(+43.04)LIQK(+45.03)K(+45.03)LQG	-	M	AELIQKKLQG	E	Acetylation (Protein N-term); ethanolamine (DE); acetyl-d3 (K); acetyl-d3 (K)	O15212	1301.78	10
471	A(+42.01)E(+43.04)LIQK(+45.03)K(+45.03)LQGE(+43.04)V	-	M	AELIQKKLQGEV	E	Acetylation (Protein N-term); ethanolamine (DE); acetyl-d3 (K); acetyl-d3 (K); ethanolamine (DE)	O15212	1572.94	12
472	A(+42.01)E(+43.04)LIQK(+45.03)K(+45.03)LQGE(+43.04)VE(+43.04)K(+45.03)YQQLQK(+45.03)D(+43.04)L	-	M	AELIQKKLQGEVEKYQQLQKDL	S	Acetylation (Protein N-term); ethanolamine (DE); acetyl-d3 (K); acetyl-d3 (K); ethanolamine (DE); more	O15212	3022.75	22
473	A(+42.01)E(+43.04)LIQK(+45.03)K(+45.03)LQGE(+43.04)VE(+43.04)K(+45.03)YQQLQK(+45.03)DL(+43.04)	-	M	AELIQKKLQGEVEKYQQLQKDL	S	Acetylation (Protein N-term); ethanolamine (DE); acetyl-d3 (K); acetyl-d3 (K); ethanolamine (DE); more	O15212	3022.75	22
474	A(+42.01)E(+43.04)LIQK(+45.03)K(+45.03)LQGEV(+43.04)	-	M	AELIQKKLQGEV	E	Acetylation (Protein N-term); ethanolamine (DE); acetyl-d3 (K); acetyl-d3 (K); ethanolamine (C-term)	O15212	1572.94	12
475	A(+42.01)E(+43.04)LNTHVNVK(+45.03)	-	M	AELNTHVNVK	E	Acetylation (Protein N-term); ethanolamine (DE); acetyl-d3 (K)	Q9NUQ6	1253.68	10
476	A(+42.01)E(+43.04)LNTHVNVK(+45.03)E(+43.04)K(+45.03)IYAV	-	M	AELNTHVNVKEKIYAV	R	Acetylation (Protein N-term); ethanolamine (DE); acetyl-d3 (K); ethanolamine (DE); acetyl-d3 (K)	Q9NUQ6	2045.14	16
477	A(+42.01)E(+43.04)LQMLLE(+43.04)E(+43.04)E(+43.04)IPSGK(+45.03)	-	M	AELQMLLEEEIPSGK	R	Acetylation (Protein N-term); ethanolamine (DE); ethanolamine (DE); ethanolamine (DE); ethanolamine (DE); more	Q8IZP0	1945.06	15
478	A(+42.01)E(+43.04)LSE(+43.04)E(+43.04)ALLSVLPTI	-	M	AELSEEALLSVLPTI	R	Acetylation (Protein N-term); ethanolamine (DE); ethanolamine (DE); ethanolamine (DE)	P45974	1755	15
479	A(+42.01)E(+43.04)LTALE(+43.04)SLIE(+43.04)M(+15.99)GFP	-	M	AELTALESLIEMGFP	R	Acetylation (Protein N-term); ethanolamine (DE); ethanolamine (DE); ethanolamine (DE); Oxidation (M)	Q04323	1806.94	15
480	A(+42.01)E(+43.04)LTALE(+43.04)SLIE(+43.04)M(+15.99)GFPRG	-	M	AELTALESLIEMGFPRG	R	Acetylation (Protein N-term); ethanolamine (DE); ethanolamine (DE); ethanolamine (DE); Oxidation (M)	Q04323	2020.07	17
481	A(+42.01)E(+43.04)LTALE(+43.04)SLIE(+43.04)MGFPRG	-	M	AELTALESLIEMGFPRG	R	Acetylation (Protein N-term); ethanolamine (DE); ethanolamine (DE); ethanolamine (DE)	Q04323	2004.07	17
482	A(+42.01)E(+43.04)LVQGQSAPVGM(+15.99)K(+45.03)AE(+43.04)GFVD(+43.04)ALH	-	M	AELVQGQSAPVGMKAEGFVDALH	R	Acetylation (Protein N-term); ethanolamine (DE); Oxidation (M); acetyl-d3 (K); ethanolamine (DE); more	Q96I24	2585.34	23
483	A(+42.01)E(+43.04)LVQGQSAPVGM(+15.99)K(+45.03)AE(+43.04)GFVDALH(+43.04)	-	M	AELVQGQSAPVGMKAEGFVDALH	R	Acetylation (Protein N-term); ethanolamine (DE); Oxidation (M); acetyl-d3 (K); ethanolamine (DE); more	Q96I24	2585.34	23
484	A(+42.01)E(+43.04)LVQGQSAPVGMK(+45.03)AE(+43.04)GFVD(+43.04)ALH	-	M	AELVQGQSAPVGMKAEGFVDALH	R	Acetylation (Protein N-term); ethanolamine (DE); acetyl-d3 (K); ethanolamine (DE); ethanolamine (DE)	Q96I24	2569.34	23
485	A(+42.01)E(+43.04)M(+15.99)GSK(+45.03)GVTAGK(+45.03)IASNVQK(+45.03)K(+45.03)LT	-	M	AEMGSKGVTAGKIASNVQKKLT	R	Acetylation (Protein N-term); ethanolamine (DE); Oxidation (M); acetyl-d3 (K); acetyl-d3 (K); more	O00499	2498.38	22
486	A(+42.01)E(+43.04)MGSK(+45.03)GVTAGK(+45.03)IASNVQK(+45.03)K(+45.03)LT	-	M	AEMGSKGVTAGKIASNVQKKLT	R	Acetylation (Protein N-term); ethanolamine (DE); acetyl-d3 (K); acetyl-d3 (K); acetyl-d3 (K); more	O00499	2482.39	22
487	A(+42.01)E(+43.04)NHAQNK(+45.03)AK(+45.03)LISET(+43.04)	-	M	AENHAQNKAKLISET	R	Acetylation (Protein N-term); ethanolamine (DE); acetyl-d3 (K); acetyl-d3 (K); ethanolamine (C-term)	Q8NHP6	1871	15
488	A(+42.01)E(+43.04)NLLD(+43.04)GPPNPK(+45.03)	-	M	AENLLDGPPNPK	R	Acetylation (Protein N-term); ethanolamine (DE); ethanolamine (DE); acetyl-d3 (K)	Q92793	1436.77	12
489	A(+42.01)E(+43.04)NPSLE(+43.04)NH	-	M	AENPSLENH	R	Acetylation (Protein N-term); ethanolamine (DE); ethanolamine (DE)	O00505	1137.54	9
490	A(+42.01)E(+43.04)NVVE(+43.04)PGPPSAK(+45.03)	-	M	AENVVEPGPPSAK	R	Acetylation (Protein N-term); ethanolamine (DE); ethanolamine (DE); acetyl-d3 (K)	Q09472	1466.78	13
491	A(+42.01)E(+43.04)PASVAAE(+43.04)SLAGS	-	M	AEPASVAAESLAGS	R	Acetylation (Protein N-term); ethanolamine (DE); ethanolamine (DE)	Q9NQT5	1386.7	14
492	A(+42.01)E(+43.04)PQPPSGGLTD(+43.04)	-	M	AEPQPPSGGLTD	E	Acetylation (Protein N-term); ethanolamine (DE); ethanolamine (DE)	Q04760	1295.64	12
493	A(+42.01)E(+43.04)PSAATQSHSI	-	M	AEPSAATQSHSI	S	Acetylation (Protein N-term); ethanolamine (DE)	O95197	1282.62	12
494	A(+42.01)E(+43.04)PSAATQSHSIS	-	M	AEPSAATQSHSIS	S	Acetylation (Protein N-term); ethanolamine (DE)	O95197	1369.65	13
495	A(+42.01)E(+43.04)PSAATQSHSISS	-	M	AEPSAATQSHSISS	S	Acetylation (Protein N-term); ethanolamine (DE)	O95197	1456.68	14
496	A(+42.01)E(+43.04)PSAATQSHSISSS	-	M	AEPSAATQSHSISSS	S	Acetylation (Protein N-term); ethanolamine (DE)	O95197	1543.71	15
497	A(+42.01)E(+43.04)PSAATQSHSISSSS	-	M	AEPSAATQSHSISSSS	F	Acetylation (Protein N-term); ethanolamine (DE)	O95197	1630.74	16
498	A(+42.01)E(+43.04)PSAATQSHSISSSSF	-	M	AEPSAATQSHSISSSSF	G	Acetylation (Protein N-term); ethanolamine (DE)	O95197	1777.81	17
499	A(+42.01)E(+43.04)PSAATQSHSISSSSFGA	-	M	AEPSAATQSHSISSSSFGA	E	Acetylation (Protein N-term); ethanolamine (DE)	O95197	1905.87	19
500	A(+42.01)E(+43.04)PSAPE(+43.04)SK(+45.03)HK(+45.03)	-	M	AEPSAPESKHK	S	Acetylation (Protein N-term); ethanolamine (DE); ethanolamine (DE); acetyl-d3 (K); acetyl-d3 (K)	Q8TCJ2	1397.74	11
501	A(+42.01)E(+43.04)PSAPE(+43.04)SK(+45.03)HK(+45.03)S	-	M	AEPSAPESKHKS	S	Acetylation (Protein N-term); ethanolamine (DE); ethanolamine (DE); acetyl-d3 (K); acetyl-d3 (K)	Q8TCJ2	1484.77	12
502	A(+42.01)E(+43.04)PSAPE(+43.04)SK(+45.03)HK(+45.03)SSL	-	M	AEPSAPESKHKSSL	N	Acetylation (Protein N-term); ethanolamine (DE); ethanolamine (DE); acetyl-d3 (K); acetyl-d3 (K)	Q8TCJ2	1684.89	14
503	A(+42.01)E(+43.04)PSAPE(+43.04)SK(+45.03)HK(+45.03)SSLN	-	M	AEPSAPESKHKSSLN	S	Acetylation (Protein N-term); ethanolamine (DE); ethanolamine (DE); acetyl-d3 (K); acetyl-d3 (K)	Q8TCJ2	1798.93	15
504	A(+42.01)E(+43.04)PWGNE(+43.04)LASAAA	-	M	AEPWGNELASAAA	R	Acetylation (Protein N-term); ethanolamine (DE); ethanolamine (DE)	P42773	1413.69	13
505	A(+42.01)E(+43.04)QE(+43.04)PTAE(+43.04)QL	-	M	AEQEPTAEQL	A	Acetylation (Protein N-term); ethanolamine (DE); ethanolamine (DE); ethanolamine (DE)	P52565	1285.65	10
506	A(+42.01)E(+43.04)QE(+43.04)PTAE(+43.04)QLAQIAAE(+43.04)N	-	M	AEQEPTAEQLAQIAAEN	E	Acetylation (Protein N-term); ethanolamine (DE); ethanolamine (DE); ethanolamine (DE); ethanolamine (DE)	P52565	2026.03	17
507	A(+42.01)E(+43.04)QE(+43.04)PTAE(+43.04)QLAQIAAE(+43.04)NE(+43.04)	-	M	AEQEPTAEQLAQIAAENE	E	Acetylation (Protein N-term); ethanolamine (DE); ethanolamine (DE); ethanolamine (DE); ethanolamine (DE); more	P52565	2198.12	18
508	A(+42.01)E(+43.04)QVALS	-	M	AEQVALS	R	Acetylation (Protein N-term); ethanolamine (DE)	P11413	801.423	7
509	A(+42.01)E(+43.04)SD(+43.04)WD(+43.04)TVTVL	-	M	AESDWDTVTVL	R	Acetylation (Protein N-term); ethanolamine (DE); ethanolamine (DE); ethanolamine (DE)	O60869	1405.71	11
510	A(+42.01)E(+43.04)SSD(+43.04)K(+45.03)LY	-	M	AESSDKLY	R	Acetylation (Protein N-term); ethanolamine (DE); ethanolamine (DE); acetyl-d3 (K)	P09874	1084.55	8
511	A(+42.01)E(+43.04)SSDK(+45.03)LY	-	M	AESSDKLY	R	Acetylation (Protein N-term); ethanolamine (DE); acetyl-d3 (K)	P09874	1041.51	8
512	A(+42.01)E(+43.04)SSE(+43.04)SFTM(+15.99)ASSPAQ	-	M	AESSESFTMASSPAQ	R	Acetylation (Protein N-term); ethanolamine (DE); ethanolamine (DE); Oxidation (M)	P49736	1672.72	15
513	A(+42.01)E(+43.04)SSE(+43.04)SFTMASSPAQ	-	M	AESSESFTMASSPAQ	R	Acetylation (Protein N-term); ethanolamine (DE); ethanolamine (DE)	P49736	1656.73	15
514	A(+42.01)E(+43.04)TE(+43.04)ALSK(+45.03)L	-	M	AETEALSKL	R	Acetylation (Protein N-term); ethanolamine (DE); ethanolamine (DE); acetyl-d3 (K)	Q9BUP3	1133.64	9
515	A(+42.01)E(+43.04)TLPGSGD(+43.04)SGPGTASLGPGVAE(+43.04)TGT	-	M	AETLPGSGDSGPGTASLGPGVAETGT	R	Acetylation (Protein N-term); ethanolamine (DE); ethanolamine (DE); ethanolamine (DE)	Q14151	2456.2	26
516	A(+42.01)E(+43.04)TLPGSGD(+43.04)SGPGTASLGPGVAETGT(+43.04)	-	M	AETLPGSGDSGPGTASLGPGVAETGT	R	Acetylation (Protein N-term); ethanolamine (DE); ethanolamine (DE); ethanolamine (C-term)	Q14151	2456.2	26
517	A(+42.01)E(+43.04)TLSGLGD(+43.04)SGAAGAA	-	M	AETLSGLGDSGAAGAA	A	Acetylation (Protein N-term); ethanolamine (DE); ethanolamine (DE)	Q15424	1474.73	16
518	A(+42.01)E(+43.04)TLSGLGD(+43.04)SGAAGAAAL	-	M	AETLSGLGDSGAAGAAAL	S	Acetylation (Protein N-term); ethanolamine (DE); ethanolamine (DE)	Q15424	1658.85	18
519	A(+42.01)E(+43.04)TLSGLGD(+43.04)SGAAGAAALSSASSE(+43.04)TGTR	-	M	AETLSGLGDSGAAGAAALSSASSETGTR	R	Acetylation (Protein N-term); ethanolamine (DE); ethanolamine (DE); ethanolamine (DE)	Q15424	2665.32	28
520	A(+42.01)E(+43.04)VE(+43.04)E(+43.04)TLK(+45.03)	-，-	M，M	AEVEETLK	R，R	Acetylation (Protein N-term); ethanolamine (DE); ethanolamine (DE); ethanolamine (DE); acetyl-d3 (K)	Q8TF09，Q9NP97	1133.64	8
521	A(+42.01)E(+43.04)VE(+43.04)QK(+45.03)K(+45.03)K(+45.03)	-	M	AEVEQKKK	R	Acetylation (Protein N-term); ethanolamine (DE); ethanolamine (DE); acetyl-d3 (K); acetyl-d3 (K); more	P62841	1221.73	8
522	A(+42.01)E(+43.04)VEE(+43.04)TLK(+45.03)	-，-	M，M	AEVEETLK	R，R	Acetylation (Protein N-term); ethanolamine (DE); ethanolamine (DE); acetyl-d3 (K)	Q8TF09，Q9NP97	1090.59	8
523	A(+42.01)E(+43.04)VEQK(+45.03)K(+45.03)K(+45.03)	-	M	AEVEQKKK	R	Acetylation (Protein N-term); ethanolamine (DE); acetyl-d3 (K); acetyl-d3 (K); acetyl-d3 (K)	P62841	1178.69	8
524	A(+42.01)E(+43.04)VQVLVLD(+43.04)G	-	M	AEVQVLVLDG	R	Acetylation (Protein N-term); ethanolamine (DE); ethanolamine (DE)	P40429	1169.67	10
525	A(+42.01)E(+43.04)VQVLVLD(+43.04)GRGHLLG	-	M	AEVQVLVLDGRGHLLG	R	Acetylation (Protein N-term); ethanolamine (DE); ethanolamine (DE)	P40429	1803.04	16
526	A(+42.01)E(+43.04)VQVLVLDG(+43.04)	-	M	AEVQVLVLDG	R	Acetylation (Protein N-term); ethanolamine (DE); ethanolamine (C-term)	P40429	1169.67	10
527	A(+42.01)E(+43.04)VQVLVLDGRGHLLG	-	M	AEVQVLVLDGRGHLLG	R	Acetylation (Protein N-term); ethanolamine (DE)	P40429	1759.99	16
528	A(+42.01)E(+43.04)YD(+43.04)LTT	-	M	AEYDLTT	R	Acetylation (Protein N-term); ethanolamine (DE); ethanolamine (DE)	P60228	939.455	7
529	A(+42.01)ELSEEALLSVLPTIR	-	M	AELSEEALLSVLPTIR	V	Acetylation (Protein N-term)	P45974	1781.98	16
530	A(+42.01)EPASVAAE(+43.04)SLAGS	-	M	AEPASVAAESLAGS	R	Acetylation (Protein N-term); ethanolamine (DE)	Q9NQT5	1343.66	14
531	A(+42.01)EVE(+43.04)QK(+45.03)K(+45.03)K(+45.03)	-	M	AEVEQKKK	R	Acetylation (Protein N-term); ethanolamine (DE); acetyl-d3 (K); acetyl-d3 (K); acetyl-d3 (K)	P62841	1178.69	8
532	A(+42.01)EVEQK(+45.03)K(+45.03)K(+45.03)	-	M	AEVEQKKK	R	Acetylation (Protein N-term); acetyl-d3 (K); acetyl-d3 (K); acetyl-d3 (K)	P62841	1135.64	8
533	A(+42.01)EVQVLVLD(+43.04)G	-	M	AEVQVLVLDG	R	Acetylation (Protein N-term); ethanolamine (DE)	P40429	1126.62	10
534	A(+42.01)FK(+45.03)D(+43.04)TGK(+45.03)TPV	-	M	AFKDTGKTPV	E	Acetylation (Protein N-term); acetyl-d3 (K); ethanolamine (DE); acetyl-d3 (K)	P60866	1237.68	10
535	A(+42.01)FK(+45.03)D(+43.04)TGK(+45.03)TPVE(+43.04)P	-	M	AFKDTGKTPVEP	E	Acetylation (Protein N-term); acetyl-d3 (K); ethanolamine (DE); acetyl-d3 (K); ethanolamine (DE)	P60866	1506.82	12
536	A(+42.01)FK(+45.03)D(+43.04)TGK(+45.03)TPVE(+43.04)PE(+43.04)	-	M	AFKDTGKTPVEPE	V	Acetylation (Protein N-term); acetyl-d3 (K); ethanolamine (DE); acetyl-d3 (K); ethanolamine (DE); more	P60866	1678.9	13
537	A(+42.01)FK(+45.03)D(+43.04)TGK(+45.03)TPVE(+43.04)PE(+43.04)VAIH	-	M	AFKDTGKTPVEPEVAIH	R	Acetylation (Protein N-term); acetyl-d3 (K); ethanolamine (DE); acetyl-d3 (K); ethanolamine (DE); more	P60866	2099.15	17
538	A(+42.01)FK(+45.03)D(+43.04)TGK(+45.03)TPVE(+43.04)PEVAIH	-	M	AFKDTGKTPVEPEVAIH	R	Acetylation (Protein N-term); acetyl-d3 (K); ethanolamine (DE); acetyl-d3 (K); ethanolamine (DE)	P60866	2056.11	17
539	A(+42.01)FK(+45.03)D(+43.04)TGK(+45.03)TPVEP	-	M	AFKDTGKTPVEP	E	Acetylation (Protein N-term); acetyl-d3 (K); ethanolamine (DE); acetyl-d3 (K)	P60866	1463.78	12
540	A(+42.01)FK(+45.03)D(+43.04)TGK(+45.03)TPVEPE(+43.04)VAIH	-	M	AFKDTGKTPVEPEVAIH	R	Acetylation (Protein N-term); acetyl-d3 (K); ethanolamine (DE); acetyl-d3 (K); ethanolamine (DE)	P60866	2056.11	17
541	A(+42.01)FK(+45.03)D(+43.04)TGK(+45.03)TPVEPEVAIH	-	M	AFKDTGKTPVEPEVAIH	R	Acetylation (Protein N-term); acetyl-d3 (K); ethanolamine (DE); acetyl-d3 (K)	P60866	2013.07	17
542	A(+42.01)FK(+45.03)DTGK(+45.03)TPVE(+43.04)PE(+43.04)VAIH	-	M	AFKDTGKTPVEPEVAIH	R	Acetylation (Protein N-term); acetyl-d3 (K); acetyl-d3 (K); ethanolamine (DE); ethanolamine (DE)	P60866	2056.11	17
543	A(+42.01)FLASGPYLTHQ	-	M	AFLASGPYLTHQ	Q	Acetylation (Protein N-term)	Q9Y6M9	1345.67	12
544	A(+42.01)FLASGPYLTHQQK(+45.03)VL	-	M	AFLASGPYLTHQQKVL	R	Acetylation (Protein N-term); acetyl-d3 (K)	Q9Y6M9	1859	16
545	A(+42.01)FLD(+43.04)NPTIILAHI	-	M	AFLDNPTIILAHI	R	Acetylation (Protein N-term); ethanolamine (DE)	Q9BPZ7	1521.86	13
546	A(+42.01)GAAE(+43.04)D(+43.04)ARALF	-	M	AGAAEDARALF	R	Acetylation (Protein N-term); ethanolamine (DE); ethanolamine (DE)	Q969E8	1218.64	11
547	A(+42.01)GAAE(+43.04)DARALF	-	M	AGAAEDARALF	R	Acetylation (Protein N-term); ethanolamine (DE)	Q969E8	1175.59	11
548	A(+42.01)GAATQASLE(+43.04)SAP	-	M	AGAATQASLESAP	R	Acetylation (Protein N-term); ethanolamine (DE)	Q9BXR0	1257.62	13
549	A(+42.01)GAGPAPGLPGAGGPVVPGPGAGIPGK(+45.03)SGEE(+43.04)(+43.04)	-	M	AGAGPAPGLPGAGGPVVPGPGAGIPGKSGEE	R	Acetylation (Protein N-term); acetyl-d3 (K); ethanolamine (C-term); ethanolamine (DE)	Q9BTD8	2750.44	31
550	A(+42.01)GAGSAAVSGAGTPVAGPTG	-	M	AGAGSAAVSGAGTPVAGPTG	R	Acetylation (Protein N-term)	O95295	1596.77	20
551	A(+42.01)GGE(+43.04)AGVTLGQPHLS	-，-	M，M	AGGEAGVTLGQPHLS	R，R	Acetylation (Protein N-term); ethanolamine (DE)	P41091，Q2VIR3	1477.75	15
552	A(+42.01)GGEAGVTLGQPHLS	-，-	M，M	AGGEAGVTLGQPHLS	R，R	Acetylation (Protein N-term)	P41091，Q2VIR3	1434.71	15
553	A(+42.01)GGGAGD(+43.04)PGLGAAAAPAPE(+43.04)T	-	M	AGGGAGDPGLGAAAAPAPET	R	Acetylation (Protein N-term); ethanolamine (DE); ethanolamine (DE)	Q13637	1734.85	20
554	A(+42.01)GGK(+45.03)AGK(+45.03)D(+43.04)SGK(+45.03)	-，-	M，M	AGGKAGKDSGK	A，A	Acetylation (Protein N-term); acetyl-d3 (K); acetyl-d3 (K); ethanolamine (DE); acetyl-d3 (K)	Q71UI9，P0C0S5	1194.66	11
555	A(+42.01)GGK(+45.03)AGK(+45.03)D(+43.04)SGK(+45.03)AK(+45.03)	-，-	M，M	AGGKAGKDSGKAK	A，T	Acetylation (Protein N-term); acetyl-d3 (K); acetyl-d3 (K); ethanolamine (DE); acetyl-d3 (K); more	Q71UI9，P0C0S5	1438.82	13
556	A(+42.01)GGK(+45.03)AGK(+45.03)D(+43.04)SGK(+45.03)AK(+45.03)TK(+45.03)	-	M	AGGKAGKDSGKAKTK	A	Acetylation (Protein N-term); acetyl-d3 (K); acetyl-d3 (K); ethanolamine (DE); acetyl-d3 (K); more	P0C0S5	1712.99	15
557	A(+42.01)GGK(+45.03)AGK(+45.03)D(+43.04)SGK(+45.03)AK(+45.03)TK(+45.03)AVS	-	M	AGGKAGKDSGKAKTKAVS	R	Acetylation (Protein N-term); acetyl-d3 (K); acetyl-d3 (K); ethanolamine (DE); acetyl-d3 (K); more	P0C0S5	1970.13	18
558	A(+42.01)GGK(+45.03)AGK(+45.03)DSGK(+45.03)AK(+45.03)AK(+45.03)AVS	-	M	AGGKAGKDSGKAKAKAVS	R	Acetylation (Protein N-term); acetyl-d3 (K); acetyl-d3 (K); acetyl-d3 (K); acetyl-d3 (K); more	Q71UI9	1897.07	18
559	A(+42.01)GGK(+45.03)AGK(+45.03)DSGK(+45.03)AK(+45.03)TK(+45.03)AVS	-	M	AGGKAGKDSGKAKTKAVS	R	Acetylation (Protein N-term); acetyl-d3 (K); acetyl-d3 (K); acetyl-d3 (K); acetyl-d3 (K); more	P0C0S5	1927.08	18
560	A(+42.01)GIAAK(+45.03)LAK(+45.03)D	-	M	AGIAAKLAKD	R	Acetylation (Protein N-term); acetyl-d3 (K); acetyl-d3 (K)	P17655	1088.63	10
561	A(+42.01)GIAAK(+45.03)LAK(+45.03)D(+43.04)	-	M	AGIAAKLAKD	R	Acetylation (Protein N-term); acetyl-d3 (K); acetyl-d3 (K); ethanolamine (DE)	P17655	1131.68	10
562	A(+42.01)GIAAK(+45.03)LAK(+45.03)D(+43.04)R	-	M	AGIAAKLAKDR	E	Acetylation (Protein N-term); acetyl-d3 (K); acetyl-d3 (K); ethanolamine (DE)	P17655	1287.78	11
563	A(+42.01)GIIK(+45.03)K(+45.03)QILK(+45.03)HLS	-，-	M，M	AGIIKKQILKHLS	R，R	Acetylation (Protein N-term); acetyl-d3 (K); acetyl-d3 (K); acetyl-d3 (K)	A0JNW5，Q6BDS2	1625.02	13
564	A(+42.01)GILFE(+43.04)D(+43.04)IFD(+43.04)VK(+45.03)	-	M	AGILFEDIFDVK	D	Acetylation (Protein N-term); ethanolamine (DE); ethanolamine (DE); ethanolamine (DE); acetyl-d3 (K)	P52434	1581.88	12
565	A(+42.01)GK(+45.03)K(+45.03)NVLSSL	-	M	AGKKNVLSSL	A	Acetylation (Protein N-term); acetyl-d3 (K); acetyl-d3 (K)	Q9UHR5	1147.67	10
566	A(+42.01)GK(+45.03)K(+45.03)VLIVYAHQ	-	M	AGKKVLIVYAHQ	E	Acetylation (Protein N-term); acetyl-d3 (K); acetyl-d3 (K)	P16083	1457.85	12
567	A(+42.01)GK(+45.03)K(+45.03)VLIVYAHQE(+43.04)P	-	M	AGKKVLIVYAHQEP	K	Acetylation (Protein N-term); acetyl-d3 (K); acetyl-d3 (K); ethanolamine (DE)	P16083	1726.99	14
568	A(+42.01)GK(+45.03)QAVSASGK(+45.03)WLD(+43.04)GI	-	M	AGKQAVSASGKWLDGI	R	Acetylation (Protein N-term); acetyl-d3 (K); acetyl-d3 (K); ethanolamine (DE)	P14927	1761.95	16
569	A(+42.01)GK(+45.03)QAVSASGK(+45.03)WLDGI	-	M	AGKQAVSASGKWLDGI	R	Acetylation (Protein N-term); acetyl-d3 (K); acetyl-d3 (K)	P14927	1718.91	16
570	A(+42.01)GLE(+43.04)LLSD(+43.04)QGY	-	M	AGLELLSDQGY	R	Acetylation (Protein N-term); ethanolamine (DE); ethanolamine (DE)	Q9NPD3	1292.66	11
571	A(+42.01)GLELLSD(+43.04)QGY	-	M	AGLELLSDQGY	R	Acetylation (Protein N-term); ethanolamine (DE)	Q9NPD3	1249.62	11
572	A(+42.01)GLGHPAAFG	-	M	AGLGHPAAFG	R	Acetylation (Protein N-term)	O94760	938.461	10
573	A(+42.01)GLNSLE(+43.04)AVK(+45.03)	-	M	AGLNSLEAVK	R	Acetylation (Protein N-term); ethanolamine (DE); acetyl-d3 (K)	P67936	1130.64	10
574	A(+42.01)GLNSLEAVK(+45.03)	-	M	AGLNSLEAVK	R	Acetylation (Protein N-term); acetyl-d3 (K)	P67936	1087.6	10
575	A(+42.01)GNFD(+43.04)SE(+43.04)E(+43.04)	-	M	AGNFDSEE	R	Acetylation (Protein N-term); ethanolamine (DE); ethanolamine (DE); ethanolamine (DE)	P46108	1038.46	8
576	A(+42.01)GPGPGAVLE(+43.04)SP	-	M	AGPGPGAVLESP	R	Acetylation (Protein N-term); ethanolamine (DE)	Q5T447	1135.59	12
577	A(+42.01)GPGPGAVLESP(+43.04)	-	M	AGPGPGAVLESP	R	Acetylation (Protein N-term); ethanolamine (C-term)	Q5T447	1135.59	12
578	A(+42.01)GPGSTGGQIGAAALAGGA	-	M	AGPGSTGGQIGAAALAGGA	R	Acetylation (Protein N-term)	Q8N653	1524.75	19
579	A(+42.01)GQE(+43.04)D(+43.04)PVQ	-	M	AGQEDPVQ	R	Acetylation (Protein N-term); ethanolamine (DE); ethanolamine (DE)	Q8WUW1	970.472	8
580	A(+42.01)GSYPE(+43.04)GAPAVLADK(+45.03)(+43.04)	-	M	AGSYPEGAPAVLADK	R	Acetylation (Protein N-term); ethanolamine (DE); acetyl-d3 (K); ethanolamine (C-term)	Q96IZ6	1617.84	15
581	A(+42.01)GTGLVAGE(+43.04)VVVD(+43.04)ALPYFD(+43.04)QGYE(+43.04)APGV	-	M	AGTGLVAGEVVVDALPYFDQGYEAPGV	R	Acetylation (Protein N-term); ethanolamine (DE); ethanolamine (DE); ethanolamine (DE); ethanolamine (DE)	O75934	2907.5	27
582	A(+42.01)GTVVLD(+43.04)D(+43.04)VE(+43.04)L	-	M	AGTVVLDDVEL	R	Acetylation (Protein N-term); ethanolamine (DE); ethanolamine (DE); ethanolamine (DE)	P25205	1300.72	11
583	A(+42.01)GTVVLD(+43.04)D(+43.04)VEL	-	M	AGTVVLDDVEL	R	Acetylation (Protein N-term); ethanolamine (DE); ethanolamine (DE)	P25205	1257.68	11
584	A(+42.01)GTVVLD(+43.04)D(+43.04)VEL(+43.04)	-	M	AGTVVLDDVEL	R	Acetylation (Protein N-term); ethanolamine (DE); ethanolamine (DE); ethanolamine (C-term)	P25205	1300.72	11
585	A(+42.01)GTVVLD(+43.04)DVE(+43.04)L	-	M	AGTVVLDDVEL	R	Acetylation (Protein N-term); ethanolamine (DE); ethanolamine (DE)	P25205	1257.68	11
586	A(+42.01)GTVVLDD(+43.04)VE(+43.04)L	-	M	AGTVVLDDVEL	R	Acetylation (Protein N-term); ethanolamine (DE); ethanolamine (DE)	P25205	1257.68	11
587	A(+42.01)GTVVLDDVE(+43.04)L	-	M	AGTVVLDDVEL	R	Acetylation (Protein N-term); ethanolamine (DE)	P25205	1214.64	11
588	A(+42.01)GVGD(+43.04)AAAPGE(+43.04)GGGGGVD(+43.04)GPQ	-	M	AGVGDAAAPGEGGGGGVDGPQ	R	Acetylation (Protein N-term); ethanolamine (DE); ethanolamine (DE); ethanolamine (DE)	Q6NXT6	1865.89	21
589	A(+42.01)GVLK(+45.03)K(+45.03)TTGLVGL	-	M	AGVLKKTTGLVGL	A	Acetylation (Protein N-term); acetyl-d3 (K); acetyl-d3 (K)	Q16718	1387.86	13
590	A(+42.01)GVLK(+45.03)K(+45.03)TTGLVGLAVC(+57.02)NTPH	-	M	AGVLKKTTGLVGLAVCNTPH	E	Acetylation (Protein N-term); acetyl-d3 (K); acetyl-d3 (K); Carbamidomethylation	Q16718	2167.19	20
591	A(+42.01)GVLK(+45.03)K(+45.03)TTGLVGLAVC(+57.02)NTPHE	-	M	AGVLKKTTGLVGLAVCNTPHE	R	Acetylation (Protein N-term); acetyl-d3 (K); acetyl-d3 (K); Carbamidomethylation	Q16718	2296.24	21
592	A(+42.01)GVLK(+45.03)K(+45.03)TTGLVGLAVC(+57.02)NTPHE(+43.04)	-	M	AGVLKKTTGLVGLAVCNTPHE	R	Acetylation (Protein N-term); acetyl-d3 (K); acetyl-d3 (K); Carbamidomethylation; ethanolamine (DE)	Q16718	2339.28	21
593	A(+42.01)GWNAYID(+43.04)NL	-	M	AGWNAYIDNL	M	Acetylation (Protein N-term); ethanolamine (DE)	P07737	1220.58	10
594	A(+42.01)GWNAYID(+43.04)NLM(+15.99)AD(+43.04)	-	M	AGWNAYIDNLMAD	G	Acetylation (Protein N-term); ethanolamine (DE); Oxidation (M); ethanolamine (DE)	P07737	1596.72	13
595	A(+42.01)GWNAYID(+43.04)NLM(+15.99)AD(+43.04)GTC(+57.02)Q	-	M	AGWNAYIDNLMADGTCQ	D	Acetylation (Protein N-term); ethanolamine (DE); Oxidation (M); ethanolamine (DE); Carbamidomethylation	P07737	2042.88	17
596	A(+42.01)GWNAYID(+43.04)NLM(+15.99)AD(+43.04)GTC(+57.02)QD(+43.04)A	-	M	AGWNAYIDNLMADGTCQDA	A	Acetylation (Protein N-term); ethanolamine (DE); Oxidation (M); ethanolamine (DE); Carbamidomethylation; more	P07737	2271.99	19
597	A(+42.01)GWNAYID(+43.04)NLM(+15.99)AD(+43.04)GTC(+57.02)QDA(+43.04)	-	M	AGWNAYIDNLMADGTCQDA	A	Acetylation (Protein N-term); ethanolamine (DE); Oxidation (M); ethanolamine (DE); Carbamidomethylation; more	P07737	2271.99	19
598	A(+42.01)GWNAYID(+43.04)NLMAD(+43.04)GTC(+57.02)Q	-	M	AGWNAYIDNLMADGTCQ	D	Acetylation (Protein N-term); ethanolamine (DE); ethanolamine (DE); Carbamidomethylation	P07737	2026.89	17
599	A(+42.01)HK(+45.03)QIYYSD(+43.04)K(+45.03)YFD(+43.04)	-	M	AHKQIYYSDKYFD	E	Acetylation (Protein N-term); acetyl-d3 (K); ethanolamine (DE); acetyl-d3 (K); ethanolamine (DE)	P33552	1894.94	13
600	A(+42.01)HK(+45.03)QIYYSDK(+45.03)YFD(+43.04)	-	M	AHKQIYYSDKYFD	E	Acetylation (Protein N-term); acetyl-d3 (K); acetyl-d3 (K); ethanolamine (DE)	P33552	1851.89	13
601	A(+42.01)HQTGIHAT	-	M	AHQTGIHAT	E	Acetylation (Protein N-term)	Q6IBS0	976.473	9
602	A(+42.01)HQTGIHATE(+43.04)	-	M	AHQTGIHATE	E	Acetylation (Protein N-term); ethanolamine (DE)	Q6IBS0	1148.56	10
603	A(+42.01)HQTGIHATE(+43.04)E(+43.04)LK(+45.03)	-	M	AHQTGIHATEELK	E	Acetylation (Protein N-term); ethanolamine (DE); ethanolamine (DE); acetyl-d3 (K)	Q6IBS0	1606.85	13
604	A(+42.01)HQTGIHATE(+43.04)E(+43.04)LK(+45.03)E(+43.04)FFAK(+45.03)A	-	M	AHQTGIHATEELKEFFAKA	R	Acetylation (Protein N-term); ethanolamine (DE); ethanolamine (DE); acetyl-d3 (K); ethanolamine (DE); more	Q6IBS0	2388.27	19
605	A(+42.01)HYK(+45.03)AAD(+43.04)SK(+45.03)	-	M	AHYKAADSK	R	Acetylation (Protein N-term); acetyl-d3 (K); ethanolamine (DE); acetyl-d3 (K)	Q99417	1164.6	9
606	A(+42.01)HYK(+45.03)AADSK(+45.03)	-	M	AHYKAADSK	R	Acetylation (Protein N-term); acetyl-d3 (K); acetyl-d3 (K)	Q99417	1121.56	9
607	A(+42.01)K(+45.03)AAAIGID(+43.04)L	-，-	M，M	AKAAAIGIDL	G，G	Acetylation (Protein N-term); acetyl-d3 (K); ethanolamine (DE)	P0DMV8，P0DMV9	1071.64	10
608	A(+42.01)K(+45.03)AAAIGID(+43.04)LGTTY	-，-	M，M	AKAAAIGIDLGTTY	S，S	Acetylation (Protein N-term); acetyl-d3 (K); ethanolamine (DE)	P0DMV8，P0DMV9	1493.82	14
609	A(+42.01)K(+45.03)AAAIGID(+43.04)LGTTYS	-，-	M，M	AKAAAIGIDLGTTYS	C，C	Acetylation (Protein N-term); acetyl-d3 (K); ethanolamine (DE)	P0DMV8，P0DMV9	1580.85	15
610	A(+42.01)K(+45.03)AAAIGID(+43.04)LGTTYSC(+57.02)V	-，-	M，M	AKAAAIGIDLGTTYSCV	G，G	Acetylation (Protein N-term); acetyl-d3 (K); ethanolamine (DE); Carbamidomethylation	P0DMV8，P0DMV9	1839.95	17
611	A(+42.01)K(+45.03)AAAIGIDL(+43.04)	-，-	M，M	AKAAAIGIDL	G，G	Acetylation (Protein N-term); acetyl-d3 (K); ethanolamine (C-term)	P0DMV8，P0DMV9	1071.64	10
612	A(+42.01)K(+45.03)AGD(+43.04)K(+45.03)SSSSGK(+45.03)K(+45.03)SLK(+45.03)	-	M	AKAGDKSSSSGKKSLK	R	Acetylation (Protein N-term); acetyl-d3 (K); ethanolamine (DE); acetyl-d3 (K); acetyl-d3 (K); more	Q9H9Y2	1888.07	16
613	A(+42.01)K(+45.03)FM(+15.99)TPVIQD(+43.04)NPSGWGPC(+57.02)AVPE(+43.04)QF	-	M	AKFMTPVIQDNPSGWGPCAVPEQF	R	Acetylation (Protein N-term); acetyl-d3 (K); Oxidation (M); ethanolamine (DE); Carbamidomethylation; more	O15371	2864.37	24
614	A(+42.01)K(+45.03)FMTPVIQD(+43.04)NPSGWGPC(+57.02)AVPE(+43.04)QF	-	M	AKFMTPVIQDNPSGWGPCAVPEQF	R	Acetylation (Protein N-term); acetyl-d3 (K); ethanolamine (DE); Carbamidomethylation; ethanolamine (DE)	O15371	2848.38	24
615	A(+42.01)K(+45.03)GD(+43.04)PK(+45.03)K(+45.03)PK(+45.03)GK(+45.03)M(+15.99)S	-	M	AKGDPKKPKGKMS	A	Acetylation (Protein N-term); acetyl-d3 (K); ethanolamine (DE); acetyl-d3 (K); acetyl-d3 (K); more	O15347	1696.97	13
616	A(+42.01)K(+45.03)GD(+43.04)PK(+45.03)K(+45.03)PK(+45.03)GK(+45.03)MS	-	M	AKGDPKKPKGKMS	A	Acetylation (Protein N-term); acetyl-d3 (K); ethanolamine (DE); acetyl-d3 (K); acetyl-d3 (K); more	O15347	1680.97	13
617	A(+42.01)K(+45.03)GD(+43.04)PK(+45.03)K(+45.03)PK(+45.03)GK(+45.03)MSAY	-	M	AKGDPKKPKGKMSAY	A	Acetylation (Protein N-term); acetyl-d3 (K); ethanolamine (DE); acetyl-d3 (K); acetyl-d3 (K); more	O15347	1915.07	15
618	A(+42.01)K(+45.03)HHPD(+43.04)LIFC(+57.02)	-	M	AKHHPDLIFC	R	Acetylation (Protein N-term); acetyl-d3 (K); ethanolamine (DE); Carbamidomethylation	Q7RTV0	1366.69	10
619	A(+42.01)K(+45.03)HLK(+45.03)FIA	-	M	AKHLKFIA	R	Acetylation (Protein N-term); acetyl-d3 (K); acetyl-d3 (K)	P82921	1058.64	8
620	A(+42.01)K(+45.03)IAK(+45.03)TH	-	M	AKIAKTH	E	Acetylation (Protein N-term); acetyl-d3 (K); acetyl-d3 (K)	O75533	899.535	7
621	A(+42.01)K(+45.03)IAK(+45.03)THE(+43.04)	-	M	AKIAKTHE	D	Acetylation (Protein N-term); acetyl-d3 (K); acetyl-d3 (K); ethanolamine (DE)	O75533	1071.62	8
622	A(+42.01)K(+45.03)IAK(+45.03)THE(+43.04)D(+43.04)I	-	M	AKIAKTHEDI	E	Acetylation (Protein N-term); acetyl-d3 (K); acetyl-d3 (K); ethanolamine (DE); ethanolamine (DE)	O75533	1342.77	10
623	A(+42.01)K(+45.03)IAK(+45.03)THE(+43.04)D(+43.04)IE(+43.04)	-	M	AKIAKTHEDIE	A	Acetylation (Protein N-term); acetyl-d3 (K); acetyl-d3 (K); ethanolamine (DE); ethanolamine (DE); more	O75533	1514.86	11
624	A(+42.01)K(+45.03)IAK(+45.03)THE(+43.04)D(+43.04)IE(+43.04)AQI	-	M	AKIAKTHEDIEAQI	R	Acetylation (Protein N-term); acetyl-d3 (K); acetyl-d3 (K); ethanolamine (DE); ethanolamine (DE); more	O75533	1827.04	14
625	A(+42.01)K(+45.03)IAK(+45.03)THE(+43.04)D(+43.04)IEAQI	-	M	AKIAKTHEDIEAQI	R	Acetylation (Protein N-term); acetyl-d3 (K); acetyl-d3 (K); ethanolamine (DE); ethanolamine (DE)	O75533	1783.99	14
626	A(+42.01)K(+45.03)IAK(+45.03)THE(+43.04)DI(+43.04)	-	M	AKIAKTHEDI	E	Acetylation (Protein N-term); acetyl-d3 (K); acetyl-d3 (K); ethanolamine (DE); ethanolamine (C-term)	O75533	1342.77	10
627	A(+42.01)K(+45.03)IAK(+45.03)THE(+43.04)DIE(+43.04)AQI	-	M	AKIAKTHEDIEAQI	R	Acetylation (Protein N-term); acetyl-d3 (K); acetyl-d3 (K); ethanolamine (DE); ethanolamine (DE)	O75533	1783.99	14
628	A(+42.01)K(+45.03)IAK(+45.03)THED(+43.04)I	-	M	AKIAKTHEDI	E	Acetylation (Protein N-term); acetyl-d3 (K); acetyl-d3 (K); ethanolamine (DE)	O75533	1299.73	10
629	A(+42.01)K(+45.03)IAK(+45.03)THED(+43.04)IE(+43.04)AQI	-	M	AKIAKTHEDIEAQI	R	Acetylation (Protein N-term); acetyl-d3 (K); acetyl-d3 (K); ethanolamine (DE); ethanolamine (DE)	O75533	1783.99	14
630	A(+42.01)K(+45.03)IAK(+45.03)THEDI(+43.04)	-	M	AKIAKTHEDI	E	Acetylation (Protein N-term); acetyl-d3 (K); acetyl-d3 (K); ethanolamine (C-term)	O75533	1299.73	10
631	A(+42.01)K(+45.03)IK(+45.03)ARD(+43.04)L	-	M	AKIKARDL	R	Acetylation (Protein N-term); acetyl-d3 (K); acetyl-d3 (K); ethanolamine (DE)	P42766	1088.68	8
632	A(+42.01)K(+45.03)IK(+45.03)ARDL(+43.04)	-	M	AKIKARDL	R	Acetylation (Protein N-term); acetyl-d3 (K); acetyl-d3 (K); ethanolamine (C-term)	P42766	1088.68	8
633	A(+42.01)K(+45.03)ISSPTE(+43.04)T	-	M	AKISSPTET	E	Acetylation (Protein N-term); acetyl-d3 (K); ethanolamine (DE)	P31949	1062.56	9
634	A(+42.01)K(+45.03)ISSPTE(+43.04)TE	-	M	AKISSPTETE	R	Acetylation (Protein N-term); acetyl-d3 (K); ethanolamine (DE)	P31949	1191.61	10
635	A(+42.01)K(+45.03)ISSPTE(+43.04)TE(+43.04)	-	M	AKISSPTETE	R	Acetylation (Protein N-term); acetyl-d3 (K); ethanolamine (DE); ethanolamine (DE)	P31949	1234.65	10
636	A(+42.01)K(+45.03)ISSPTETE(+43.04)	-	M	AKISSPTETE	R	Acetylation (Protein N-term); acetyl-d3 (K); ethanolamine (DE)	P31949	1191.61	10
637	A(+42.01)K(+45.03)ISSPTETE(+43.04)(+43.04)	-	M	AKISSPTETE	R	Acetylation (Protein N-term); acetyl-d3 (K); ethanolamine (C-term); ethanolamine (DE)	P31949	1234.65	10
638	A(+42.01)K(+45.03)PAQGAK(+45.03)Y	-	M	AKPAQGAKY	R	Acetylation (Protein N-term); acetyl-d3 (K); acetyl-d3 (K)	P08133	1064.58	9
639	A(+42.01)K(+45.03)PLTD(+43.04)QE(+43.04)K(+45.03)	-	M	AKPLTDQEK	R	Acetylation (Protein N-term); acetyl-d3 (K); ethanolamine (DE); ethanolamine (DE); acetyl-d3 (K)	P06737	1246.7	9
640	A(+42.01)K(+45.03)PLTD(+43.04)QE(+43.04)K(+45.03)R	-	M	AKPLTDQEKR	R	Acetylation (Protein N-term); acetyl-d3 (K); ethanolamine (DE); ethanolamine (DE); acetyl-d3 (K)	P06737	1402.81	10
641	A(+42.01)K(+45.03)PLTD(+43.04)QEK(+45.03)	-	M	AKPLTDQEK	R	Acetylation (Protein N-term); acetyl-d3 (K); ethanolamine (DE); acetyl-d3 (K)	P06737	1203.66	9
642	A(+42.01)K(+45.03)PLTD(+43.04)QEK(+45.03)(+43.04)	-	M	AKPLTDQEK	R	Acetylation (Protein N-term); acetyl-d3 (K); ethanolamine (DE); acetyl-d3 (K); ethanolamine (C-term)	P06737	1246.7	9
643	A(+42.01)K(+45.03)PLTD(+43.04)SE(+43.04)K(+45.03)	-	M	AKPLTDSEK	R	Acetylation (Protein N-term); acetyl-d3 (K); ethanolamine (DE); ethanolamine (DE); acetyl-d3 (K)	P11216	1205.68	9
644	A(+42.01)K(+45.03)PLTDQE(+43.04)K(+45.03)	-	M	AKPLTDQEK	R	Acetylation (Protein N-term); acetyl-d3 (K); ethanolamine (DE); acetyl-d3 (K)	P06737	1203.66	9
645	A(+42.01)K(+45.03)PLTDQE(+43.04)K(+45.03)R	-	M	AKPLTDQEKR	R	Acetylation (Protein N-term); acetyl-d3 (K); ethanolamine (DE); acetyl-d3 (K)	P06737	1359.76	10
646	A(+42.01)K(+45.03)QLQAR	-	M	AKQLQAR	R	Acetylation (Protein N-term); acetyl-d3 (K)	Q16773	900.522	7
647	A(+42.01)K(+45.03)SK(+45.03)NHTTHNQS	-	M	AKSKNHTTHNQS	R	Acetylation (Protein N-term); acetyl-d3 (K); acetyl-d3 (K)	P47914	1483.73	12
648	A(+42.01)K(+45.03)VE(+43.04)QVLSLE(+43.04)PQHE(+43.04)LK(+45.03)F	-	M	AKVEQVLSLEPQHELKF	R	Acetylation (Protein N-term); acetyl-d3 (K); ethanolamine (DE); ethanolamine (DE); ethanolamine (DE); more	O95292	2255.28	17
649	A(+42.01)K(+45.03)VE(+43.04)QVLSLE(+43.04)PQHELK(+45.03)F	-	M	AKVEQVLSLEPQHELKF	R	Acetylation (Protein N-term); acetyl-d3 (K); ethanolamine (DE); ethanolamine (DE); acetyl-d3 (K)	O95292	2212.24	17
650	A(+42.01)K(+45.03)VEQVLSLE(+43.04)PQHE(+43.04)LK(+45.03)F	-	M	AKVEQVLSLEPQHELKF	R	Acetylation (Protein N-term); acetyl-d3 (K); ethanolamine (DE); ethanolamine (DE); acetyl-d3 (K)	O95292	2212.24	17
651	A(+42.01)K(+45.03)VSE(+43.04)LYD(+43.04)VTWE(+43.04)E(+43.04)M	-	M	AKVSELYDVTWEEM	R	Acetylation (Protein N-term); acetyl-d3 (K); ethanolamine (DE); ethanolamine (DE); ethanolamine (DE); more	Q15006	1957.99	14
652	A(+42.01)K(+45.03)VSE(+43.04)LYD(+43.04)VTWE(+43.04)E(+43.04)M(+15.99)	-	M	AKVSELYDVTWEEM	R	Acetylation (Protein N-term); acetyl-d3 (K); ethanolamine (DE); ethanolamine (DE); ethanolamine (DE); more	Q15006	1973.98	14
653	A(+42.01)K(+45.03)WGE(+43.04)GD(+43.04)P	-	M	AKWGEGDP	R	Acetylation (Protein N-term); acetyl-d3 (K); ethanolamine (DE); ethanolamine (DE)	O95433	1031.51	8
654	A(+42.01)K(+45.03)WGE(+43.04)GD(+43.04)PRWIVE(+43.04)E(+43.04)	-	M	AKWGEGDPRWIVEE	R	Acetylation (Protein N-term); acetyl-d3 (K); ethanolamine (DE); ethanolamine (DE); ethanolamine (DE); more	O95433	1930.01	14
655	A(+42.01)K(+45.03)WGE(+43.04)GD(+43.04)PRWIVEE(+43.04)(+43.04)	-	M	AKWGEGDPRWIVEE	R	Acetylation (Protein N-term); acetyl-d3 (K); ethanolamine (DE); ethanolamine (DE); ethanolamine (C-term); more	O95433	1930.01	14
656	A(+42.01)K(+45.03)YLAQIIVM(+15.99)GVQVVG	-	M	AKYLAQIIVMGVQVVG	R	Acetylation (Protein N-term); acetyl-d3 (K); Oxidation (M)	Q9Y3D7	1791	16
657	A(+42.01)LD(+43.04)PAD(+43.04)QHL	-	M	ALDPADQHL	R	Acetylation (Protein N-term); ethanolamine (DE); ethanolamine (DE)	Q7Z7K0	1106.57	9
658	A(+42.01)LFPAFAGLSE(+43.04)APD(+43.04)GGSS	-	M	ALFPAFAGLSEAPDGGSS	R	Acetylation (Protein N-term); ethanolamine (DE); ethanolamine (DE)	Q9H7Z3	1820.89	18
659	A(+42.01)LHVPK(+45.03)APGF	-	M	ALHVPKAPGF	A	Acetylation (Protein N-term); acetyl-d3 (K)	P50990	1122.63	10
660	A(+42.01)LHVPK(+45.03)APGFA	-	M	ALHVPKAPGFA	Q	Acetylation (Protein N-term); acetyl-d3 (K)	P50990	1193.66	11
661	A(+42.01)LHVPK(+45.03)APGFAQ	-	M	ALHVPKAPGFAQ	M	Acetylation (Protein N-term); acetyl-d3 (K)	P50990	1321.72	12
662	A(+42.01)LHVPK(+45.03)APGFAQM(+15.99)	-	M	ALHVPKAPGFAQM	L	Acetylation (Protein N-term); acetyl-d3 (K); Oxidation (M)	P50990	1468.76	13
663	A(+42.01)LHVPK(+45.03)APGFAQM(+15.99)LK(+45.03)	-	M	ALHVPKAPGFAQMLK	E	Acetylation (Protein N-term); acetyl-d3 (K); Oxidation (M); acetyl-d3 (K)	P50990	1754.97	15
664	A(+42.01)LHVPK(+45.03)APGFAQM(+15.99)LK(+45.03)E(+43.04)G	-	M	ALHVPKAPGFAQMLKEG	A	Acetylation (Protein N-term); acetyl-d3 (K); Oxidation (M); acetyl-d3 (K); ethanolamine (DE)	P50990	1984.07	17
665	A(+42.01)LHVPK(+45.03)APGFAQM(+15.99)LK(+45.03)EG(+43.04)	-	M	ALHVPKAPGFAQMLKEG	A	Acetylation (Protein N-term); acetyl-d3 (K); Oxidation (M); acetyl-d3 (K); ethanolamine (C-term)	P50990	1984.07	17
666	A(+42.01)LHVPK(+45.03)APGFAQMLK(+45.03)	-	M	ALHVPKAPGFAQMLK	E	Acetylation (Protein N-term); acetyl-d3 (K); acetyl-d3 (K)	P50990	1738.97	15
667	A(+42.01)LHVPK(+45.03)APGFAQMLK(+45.03)E(+43.04)G	-	M	ALHVPKAPGFAQMLKEG	A	Acetylation (Protein N-term); acetyl-d3 (K); acetyl-d3 (K); ethanolamine (DE)	P50990	1968.08	17
668	A(+42.01)LK(+45.03)D(+43.04)YALE(+43.04)K(+45.03)	-	M	ALKDYALEK	E	Acetylation (Protein N-term); acetyl-d3 (K); ethanolamine (DE); ethanolamine (DE); acetyl-d3 (K)	P33993	1267.73	9
669	A(+42.01)LK(+45.03)M(+15.99)VK(+45.03)GSID(+43.04)	-	M	ALKMVKGSID	R	Acetylation (Protein N-term); acetyl-d3 (K); Oxidation (M); acetyl-d3 (K); ethanolamine (DE)	O14617	1251.7	10
670	A(+42.01)LK(+45.03)MVK(+45.03)GSID(+43.04)	-	M	ALKMVKGSID	R	Acetylation (Protein N-term); acetyl-d3 (K); acetyl-d3 (K); ethanolamine (DE)	O14617	1235.71	10
671	A(+42.01)LK(+45.03)QISSNK(+45.03)	-	M	ALKQISSNK	C	Acetylation (Protein N-term); acetyl-d3 (K); acetyl-d3 (K)	P10768	1119.64	9
672	A(+42.01)LK(+45.03)QISSNK(+45.03)C(+57.02)F	-	M	ALKQISSNKCF	G	Acetylation (Protein N-term); acetyl-d3 (K); acetyl-d3 (K); Carbamidomethylation	P10768	1426.74	11
673	A(+42.01)LLC(+57.02)YNRGC(+57.02)GQ	-	M	ALLCYNRGCGQ	R	Acetylation (Protein N-term); Carbamidomethylation; Carbamidomethylation	Q9UHD1	1352.6	11
674	A(+42.01)LPIIVK(+45.03)WGGQ	-	M	ALPIIVKWGGQ	E	Acetylation (Protein N-term); acetyl-d3 (K)	Q8WVY7	1267.74	11
675	A(+42.01)LSAE(+43.04)TE(+43.04)SHIY	-	M	ALSAETESHIY	R	Acetylation (Protein N-term); ethanolamine (DE); ethanolamine (DE)	O14569	1347.67	11
676	A(+42.01)LSD(+43.04)AD(+43.04)VQK(+45.03)QIK(+45.03)HM	-	M	ALSDADVQKQIKHM	M	Acetylation (Protein N-term); ethanolamine (DE); ethanolamine (DE); acetyl-d3 (K); acetyl-d3 (K)	P36543	1800.97	14
677	A(+42.01)LSD(+43.04)AD(+43.04)VQK(+45.03)QIK(+45.03)HM(+15.99)	-	M	ALSDADVQKQIKHM	M	Acetylation (Protein N-term); ethanolamine (DE); ethanolamine (DE); acetyl-d3 (K); acetyl-d3 (K); more	P36543	1816.96	14
678	A(+42.01)LSD(+43.04)AD(+43.04)VQK(+45.03)QIK(+45.03)HM(+15.99)M	-	M	ALSDADVQKQIKHMM	A	Acetylation (Protein N-term); ethanolamine (DE); ethanolamine (DE); acetyl-d3 (K); acetyl-d3 (K); more	P36543	1948	15
679	A(+42.01)LSD(+43.04)AD(+43.04)VQK(+45.03)QIK(+45.03)HM(+15.99)M(+15.99)	-	M	ALSDADVQKQIKHMM	A	Acetylation (Protein N-term); ethanolamine (DE); ethanolamine (DE); acetyl-d3 (K); acetyl-d3 (K); more	P36543	1964	15
680	A(+42.01)LSD(+43.04)AD(+43.04)VQK(+45.03)QIK(+45.03)HMM	-	M	ALSDADVQKQIKHMM	A	Acetylation (Protein N-term); ethanolamine (DE); ethanolamine (DE); acetyl-d3 (K); acetyl-d3 (K)	P36543	1932.01	15
681	A(+42.01)LSD(+43.04)AD(+43.04)VQK(+45.03)QIK(+45.03)HMM(+15.99)	-	M	ALSDADVQKQIKHMM	A	Acetylation (Protein N-term); ethanolamine (DE); ethanolamine (DE); acetyl-d3 (K); acetyl-d3 (K); more	P36543	1948	15
682	A(+42.01)LTSFLPAPTQLSQD(+43.04)QLE(+43.04)AE(+43.04)E(+43.04)K(+45.03)A	-	M	ALTSFLPAPTQLSQDQLEAEEKA	R	Acetylation (Protein N-term); ethanolamine (DE); ethanolamine (DE); ethanolamine (DE); ethanolamine (DE); more	Q13573	2745.46	23
683	A(+42.01)LVD(+43.04)K(+45.03)HK(+45.03)VK(+45.03)	-	M	ALVDKHKVK	R	Acetylation (Protein N-term); ethanolamine (DE); acetyl-d3 (K); acetyl-d3 (K); acetyl-d3 (K)	P56545	1256.78	9
684	A(+42.01)LVDK(+45.03)HK(+45.03)VK(+45.03)	-	M	ALVDKHKVK	R	Acetylation (Protein N-term); acetyl-d3 (K); acetyl-d3 (K); acetyl-d3 (K)	P56545	1213.74	9
685	A(+42.01)M(+15.99)HNK(+45.03)AAPPQIPD(+43.04)TR	-	M	AMHNKAAPPQIPDTR	R	Acetylation (Protein N-term); Oxidation (M); acetyl-d3 (K); ethanolamine (DE)	Q9HAF1	1791.91	15
686	A(+42.01)M(+15.99)HNK(+45.03)AAPPQIPDT(+43.04)	-	M	AMHNKAAPPQIPDT	R	Acetylation (Protein N-term); Oxidation (M); acetyl-d3 (K); ethanolamine (C-term)	Q9HAF1	1635.81	14
687	A(+42.01)M(+15.99)HNK(+45.03)AAPPQIPDTR(+43.04)	-	M	AMHNKAAPPQIPDTR	R	Acetylation (Protein N-term); Oxidation (M); acetyl-d3 (K); ethanolamine (C-term)	Q9HAF1	1791.91	15
688	A(+42.01)M(+15.99)QK(+45.03)IFA	-	M	AMQKIFA	R	Acetylation (Protein N-term); Oxidation (M); acetyl-d3 (K)	P13929	910.466	7
689	A(+42.01)M(+15.99)TAGTTTTFPM(+15.99)SNHT	-	M	AMTAGTTTTFPMSNHT	R	Acetylation (Protein N-term); Oxidation (M); Oxidation (M)	Q9Y2H1	1741.73	16
690	A(+42.01)M(+15.99)VSE(+43.04)FLK(+45.03)QAW	-	M	AMVSEFLKQAW	F	Acetylation (Protein N-term); Oxidation (M); ethanolamine (DE); acetyl-d3 (K)	P04083	1454.73	11
691	A(+42.01)MQK(+45.03)IFA	-	M	AMQKIFA	R	Acetylation (Protein N-term); acetyl-d3 (K)	P13929	894.471	7
692	A(+42.01)MVSE(+43.04)FLK(+45.03)QAW	-	M	AMVSEFLKQAW	F	Acetylation (Protein N-term); ethanolamine (DE); acetyl-d3 (K)	P04083	1438.74	11
693	A(+42.01)NE(+43.04)AYPC(+57.02)PC(+57.02)D(+43.04)IGH	-	M	ANEAYPCPCDIGH	R	Acetylation (Protein N-term); ethanolamine (DE); Carbamidomethylation; Carbamidomethylation; ethanolamine (DE)	Q96DG6	1630.69	13
694	A(+42.01)NE(+43.04)VIK(+45.03)C(+57.02)K(+45.03)	-	M	ANEVIKCK	A	Acetylation (Protein N-term); ethanolamine (DE); acetyl-d3 (K); Carbamidomethylation; acetyl-d3 (K)	P11766	1135.62	8
695	A(+42.01)NE(+43.04)VIK(+45.03)C(+57.02)K(+45.03)A	-	M	ANEVIKCKA	A	Acetylation (Protein N-term); ethanolamine (DE); acetyl-d3 (K); Carbamidomethylation; acetyl-d3 (K)	P11766	1206.65	9
696	A(+42.01)NE(+43.04)VIK(+45.03)C(+57.02)K(+45.03)AAVAW	-	M	ANEVIKCKAAVAW	E	Acetylation (Protein N-term); ethanolamine (DE); acetyl-d3 (K); Carbamidomethylation; acetyl-d3 (K)	P11766	1633.88	13
697	A(+42.01)NE(+43.04)VIK(+45.03)C(+57.02)K(+45.03)AAVAWE(+43.04)AGK(+45.03)PL	-	M	ANEVIKCKAAVAWEAGKPL	S	Acetylation (Protein N-term); ethanolamine (DE); acetyl-d3 (K); Carbamidomethylation; acetyl-d3 (K); more	P11766	2317.28	19
698	A(+42.01)NK(+45.03)GPSYGM(+15.99)S	-	M	ANKGPSYGMS	R	Acetylation (Protein N-term); acetyl-d3 (K); Oxidation (M)	Q01995	1113.48	10
699	A(+42.01)NK(+45.03)GPSYGMS	-	M	ANKGPSYGMS	R	Acetylation (Protein N-term); acetyl-d3 (K)	Q01995	1097.49	10
700	A(+42.01)NLE(+43.04)E(+43.04)SFPRGGT	-	M	ANLEESFPRGGT	R	Acetylation (Protein N-term); ethanolamine (DE); ethanolamine (DE)	Q14690	1404.7	12
701	A(+42.01)NND(+43.04)AVLK(+45.03)	-	M	ANNDAVLK	R	Acetylation (Protein N-term); ethanolamine (DE); acetyl-d3 (K)	Q12904	973.527	8
702	A(+42.01)NVAD(+43.04)TK(+45.03)LY	-	M	ANVADTKLY	D	Acetylation (Protein N-term); ethanolamine (DE); acetyl-d3 (K)	O60884	1123.6	9
703	A(+42.01)NVAD(+43.04)TK(+45.03)LYD(+43.04)ILGVPPGASE(+43.04)NE(+43.04)LK(+45.03)K(+45.03)AY	-	M	ANVADTKLYDILGVPPGASENELKKAY	R	Acetylation (Protein N-term); ethanolamine (DE); acetyl-d3 (K); ethanolamine (DE); ethanolamine (DE); more	O60884	3224.76	27
704	A(+42.01)NVGLQFQASAGD(+43.04)SD(+43.04)PQS	-	M	ANVGLQFQASAGDSDPQS	R	Acetylation (Protein N-term); ethanolamine (DE); ethanolamine (DE)	Q8NDH3	1918.9	18
705	A(+42.01)NVSK(+45.03)K(+45.03)VSWSG	-	M	ANVSKKVSWSG	R	Acetylation (Protein N-term); acetyl-d3 (K); acetyl-d3 (K)	P51798	1293.68	11
706	A(+42.01)PEVLPK(+45.03)PRM(+15.99)	-	M	APEVLPKPRM	R	Acetylation (Protein N-term); acetyl-d3 (K); Oxidation (M)	P09669	1239.67	10
707	A(+42.01)PK(+45.03)AK(+45.03)K(+45.03)E(+43.04)APAPPK(+45.03)A	-	M	APKAKKEAPAPPKA	E	Acetylation (Protein N-term); acetyl-d3 (K); acetyl-d3 (K); acetyl-d3 (K); ethanolamine (DE); more	P62750	1668	14
708	A(+42.01)PK(+45.03)AK(+45.03)K(+45.03)E(+43.04)APAPPK(+45.03)A(+43.04)	-	M	APKAKKEAPAPPKA	E	Acetylation (Protein N-term); acetyl-d3 (K); acetyl-d3 (K); acetyl-d3 (K); ethanolamine (DE); more	P62750	1711.04	14
709	A(+42.01)PK(+45.03)AK(+45.03)K(+45.03)E(+43.04)APAPPK(+45.03)AE	-	M	APKAKKEAPAPPKAE	A	Acetylation (Protein N-term); acetyl-d3 (K); acetyl-d3 (K); acetyl-d3 (K); ethanolamine (DE); more	P62750	1797.04	15
710	A(+42.01)PK(+45.03)AK(+45.03)K(+45.03)E(+43.04)APAPPK(+45.03)AE(+43.04)	-	M	APKAKKEAPAPPKAE	A	Acetylation (Protein N-term); acetyl-d3 (K); acetyl-d3 (K); acetyl-d3 (K); ethanolamine (DE); more	P62750	1840.08	15
711	A(+42.01)PK(+45.03)AK(+45.03)K(+45.03)E(+43.04)APAPPK(+45.03)AE(+43.04)AK(+45.03)	-	M	APKAKKEAPAPPKAEAK	A	Acetylation (Protein N-term); acetyl-d3 (K); acetyl-d3 (K); acetyl-d3 (K); ethanolamine (DE); more	P62750	2084.25	17
712	A(+42.01)PK(+45.03)AK(+45.03)K(+45.03)E(+43.04)APAPPK(+45.03)AE(+43.04)AK(+45.03)AK(+45.03)	-	M	APKAKKEAPAPPKAEAKAK	A	Acetylation (Protein N-term); acetyl-d3 (K); acetyl-d3 (K); acetyl-d3 (K); ethanolamine (DE); more	P62750	2328.41	19
713	A(+42.01)PK(+45.03)AK(+45.03)K(+45.03)E(+43.04)APAPPK(+45.03)AE(+43.04)AK(+45.03)AK(+45.03)A	-	M	APKAKKEAPAPPKAEAKAKA	L	Acetylation (Protein N-term); acetyl-d3 (K); acetyl-d3 (K); acetyl-d3 (K); ethanolamine (DE); more	P62750	2399.44	20
714	A(+42.01)PK(+45.03)AK(+45.03)K(+45.03)E(+43.04)APAPPK(+45.03)AE(+43.04)AK(+45.03)AK(+45.03)AL	-	M	APKAKKEAPAPPKAEAKAKAL	K	Acetylation (Protein N-term); acetyl-d3 (K); acetyl-d3 (K); acetyl-d3 (K); ethanolamine (DE); more	P62750	2512.53	21
715	A(+42.01)PK(+45.03)AK(+45.03)K(+45.03)E(+43.04)APAPPK(+45.03)AE(+43.04)AK(+45.03)AK(+45.03)ALK(+45.03)	-	M	APKAKKEAPAPPKAEAKAKALK	A	Acetylation (Protein N-term); acetyl-d3 (K); acetyl-d3 (K); acetyl-d3 (K); ethanolamine (DE); more	P62750	2685.65	22
716	A(+42.01)PK(+45.03)AK(+45.03)K(+45.03)E(+43.04)APAPPK(+45.03)AE(+43.04)AK(+45.03)AK(+45.03)ALK(+45.03)AK(+45.03)K(+45.03)	-	M	APKAKKEAPAPPKAEAKAKALKAKK	A	Acetylation (Protein N-term); acetyl-d3 (K); acetyl-d3 (K); acetyl-d3 (K); ethanolamine (DE); more	P62750	3102.94	25
717	A(+42.01)PK(+45.03)AK(+45.03)K(+45.03)E(+43.04)APAPPK(+45.03)AE(+43.04)AK(+45.03)AK(+45.03)ALK(+45.03)AK(+45.03)K(+45.03)AVLK(+45.03)GVHSHK(+45.03)K(+45.03)K(+45.03)K(+45.03)I	-	M	APKAKKEAPAPPKAEAKAKALKAKKAVLKGVHSHKKKKI	R	Acetylation (Protein N-term); acetyl-d3 (K); acetyl-d3 (K); acetyl-d3 (K); ethanolamine (DE); more	P62750	4882.07	39
718	A(+42.01)PK(+45.03)AK(+45.03)K(+45.03)E(+43.04)APAPPK(+45.03)AEAK(+45.03)	-	M	APKAKKEAPAPPKAEAK	A	Acetylation (Protein N-term); acetyl-d3 (K); acetyl-d3 (K); acetyl-d3 (K); ethanolamine (DE); more	P62750	2041.2	17
719	A(+42.01)PK(+45.03)AK(+45.03)K(+45.03)E(+43.04)APAPPK(+45.03)AEAK(+45.03)(+43.04)	-	M	APKAKKEAPAPPKAEAK	A	Acetylation (Protein N-term); acetyl-d3 (K); acetyl-d3 (K); acetyl-d3 (K); ethanolamine (DE); more	P62750	2084.25	17
720	A(+42.01)PK(+45.03)AK(+45.03)K(+45.03)E(+43.04)APAPPK(+45.03)AEAK(+45.03)AK(+45.03)	-	M	APKAKKEAPAPPKAEAKAK	A	Acetylation (Protein N-term); acetyl-d3 (K); acetyl-d3 (K); acetyl-d3 (K); ethanolamine (DE); more	P62750	2285.37	19
721	A(+42.01)PK(+45.03)AK(+45.03)K(+45.03)E(+43.04)APAPPK(+45.03)AEAK(+45.03)AK(+45.03)ALK(+45.03)AK(+45.03)K(+45.03)	-	M	APKAKKEAPAPPKAEAKAKALKAKK	A	Acetylation (Protein N-term); acetyl-d3 (K); acetyl-d3 (K); acetyl-d3 (K); ethanolamine (DE); more	P62750	3059.9	25
722	A(+42.01)PK(+45.03)AK(+45.03)K(+45.03)EAPAPPK(+45.03)A	-	M	APKAKKEAPAPPKA	E	Acetylation (Protein N-term); acetyl-d3 (K); acetyl-d3 (K); acetyl-d3 (K); acetyl-d3 (K)	P62750	1624.96	14
723	A(+42.01)PK(+45.03)AK(+45.03)K(+45.03)EAPAPPK(+45.03)AE(+43.04)	-	M	APKAKKEAPAPPKAE	A	Acetylation (Protein N-term); acetyl-d3 (K); acetyl-d3 (K); acetyl-d3 (K); acetyl-d3 (K); more	P62750	1797.04	15
724	A(+42.01)PK(+45.03)AK(+45.03)K(+45.03)EAPAPPK(+45.03)AE(+43.04)AK(+45.03)	-	M	APKAKKEAPAPPKAEAK	A	Acetylation (Protein N-term); acetyl-d3 (K); acetyl-d3 (K); acetyl-d3 (K); acetyl-d3 (K); more	P62750	2041.2	17
725	A(+42.01)PK(+45.03)AK(+45.03)K(+45.03)EAPAPPK(+45.03)AE(+43.04)AK(+45.03)AK(+45.03)	-	M	APKAKKEAPAPPKAEAKAK	A	Acetylation (Protein N-term); acetyl-d3 (K); acetyl-d3 (K); acetyl-d3 (K); acetyl-d3 (K); more	P62750	2285.37	19
726	A(+42.01)PK(+45.03)AK(+45.03)K(+45.03)EAPAPPK(+45.03)AE(+43.04)AK(+45.03)AK(+45.03)ALK(+45.03)AK(+45.03)K(+45.03)	-	M	APKAKKEAPAPPKAEAKAKALKAKK	A	Acetylation (Protein N-term); acetyl-d3 (K); acetyl-d3 (K); acetyl-d3 (K); acetyl-d3 (K); more	P62750	3059.9	25
727	A(+42.01)PK(+45.03)QD(+43.04)PK(+45.03)PK(+45.03)FQE(+43.04)GE(+43.04)	-	M	APKQDPKPKFQEGE	R	Acetylation (Protein N-term); acetyl-d3 (K); ethanolamine (DE); acetyl-d3 (K); acetyl-d3 (K); more	Q9UBU8	1904.04	14
728	A(+42.01)QAD(+43.04)IALIGL	-	M	AQADIALIGL	A	Acetylation (Protein N-term); ethanolamine (DE)	P52209	1068.62	10
729	A(+42.01)QAK(+45.03)INAK(+45.03)	-	M	AQAKINAK	A	Acetylation (Protein N-term); acetyl-d3 (K); acetyl-d3 (K)	O95816	974.567	8
730	A(+42.01)QAK(+45.03)INAK(+45.03)ANE(+43.04)	-	M	AQAKINAKANE	G	Acetylation (Protein N-term); acetyl-d3 (K); acetyl-d3 (K); ethanolamine (DE)	O95816	1331.73	11
731	A(+42.01)QAK(+45.03)INAK(+45.03)ANE(+43.04)G	-	M	AQAKINAKANEG	R	Acetylation (Protein N-term); acetyl-d3 (K); acetyl-d3 (K); ethanolamine (DE)	O95816	1388.75	12
732	A(+42.01)QAK(+45.03)INAK(+45.03)ANE(+43.04)GRFC(+57.02)	-	M	AQAKINAKANEGRFC	R	Acetylation (Protein N-term); acetyl-d3 (K); acetyl-d3 (K); ethanolamine (DE); Carbamidomethylation	O95816	1851.95	15
733	A(+42.01)QAK(+45.03)INAK(+45.03)ANEG	-	M	AQAKINAKANEG	R	Acetylation (Protein N-term); acetyl-d3 (K); acetyl-d3 (K)	O95816	1345.71	12
734	A(+42.01)QAK(+45.03)INAK(+45.03)ANEG(+43.04)	-	M	AQAKINAKANEG	R	Acetylation (Protein N-term); acetyl-d3 (K); acetyl-d3 (K); ethanolamine (C-term)	O95816	1388.75	12
735	A(+42.01)QAK(+45.03)INAK(+45.03)ANEGRFC(+57.02)	-	M	AQAKINAKANEGRFC	R	Acetylation (Protein N-term); acetyl-d3 (K); acetyl-d3 (K); Carbamidomethylation	O95816	1808.91	15
736	A(+42.01)QALSE(+43.04)E(+43.04)E(+43.04)FQ	-	M	AQALSEEEFQ	R	Acetylation (Protein N-term); ethanolamine (DE); ethanolamine (DE); ethanolamine (DE)	Q4V328	1321.65	10
737	A(+42.01)QD(+43.04)QGE(+43.04)K(+45.03)E(+43.04)NPM	-	M	AQDQGEKENPM	R	Acetylation (Protein N-term); ethanolamine (DE); ethanolamine (DE); acetyl-d3 (K); ethanolamine (DE)	P62913	1461.7	11
738	A(+42.01)QD(+43.04)QGE(+43.04)K(+45.03)E(+43.04)NPM(+15.99)	-	M	AQDQGEKENPM	R	Acetylation (Protein N-term); ethanolamine (DE); ethanolamine (DE); acetyl-d3 (K); ethanolamine (DE); more	P62913	1477.69	11
739	A(+42.01)QDQGE(+43.04)K(+45.03)E(+43.04)NPM	-	M	AQDQGEKENPM	R	Acetylation (Protein N-term); ethanolamine (DE); acetyl-d3 (K); ethanolamine (DE)	P62913	1418.65	11
740	A(+42.01)QDQGE(+43.04)K(+45.03)E(+43.04)NPM(+15.99)	-	M	AQDQGEKENPM	R	Acetylation (Protein N-term); ethanolamine (DE); acetyl-d3 (K); ethanolamine (DE); Oxidation (M)	P62913	1434.65	11
741	A(+42.01)QE(+43.04)FVNC(+57.02)K(+45.03)IQPGK(+45.03)VVVFIK(+45.03)PTC(+57.02)PYC(+57.02)	-	M	AQEFVNCKIQPGKVVVFIKPTCPYC	R	Acetylation (Protein N-term); ethanolamine (DE); Carbamidomethylation; acetyl-d3 (K); acetyl-d3 (K); more	P35754	3201.64	25
742	A(+42.01)QE(+43.04)VSE(+43.04)YLSQNP	-	M	AQEVSEYLSQNP	R	Acetylation (Protein N-term); ethanolamine (DE); ethanolamine (DE)	Q9NXV6	1491.72	12
743	A(+42.01)QFD(+43.04)TE(+43.04)YQ	-	M	AQFDTEYQ	R	Acetylation (Protein N-term); ethanolamine (DE); ethanolamine (DE)	Q7Z3C6	1128.51	8
744	A(+42.01)QLGK(+45.03)LLK(+45.03)E(+43.04)QK(+45.03)YD(+43.04)	-	M	AQLGKLLKEQKYD	R	Acetylation (Protein N-term); acetyl-d3 (K); acetyl-d3 (K); ethanolamine (DE); acetyl-d3 (K); more	Q13564	1796.04	13
745	A(+42.01)QNLK(+45.03)D(+43.04)LAG	-	M	AQNLKDLAG	R	Acetylation (Protein N-term); acetyl-d3 (K); ethanolamine (DE)	Q99623	1058.58	9
746	A(+42.01)QNLK(+45.03)DLAG	-	M	AQNLKDLAG	R	Acetylation (Protein N-term); acetyl-d3 (K)	Q99623	1015.54	9
747	A(+42.01)QPGPASQPD(+43.04)VSLQQ	-	M	AQPGPASQPDVSLQQ	R	Acetylation (Protein N-term); ethanolamine (DE)	Q15276	1606.8	15
748	A(+42.01)QQAAD(+43.04)K(+45.03)YL	-	M	AQQAADKYL	Y	Acetylation (Protein N-term); ethanolamine (DE); acetyl-d3 (K)	P35579	1136.59	9
749	A(+42.01)QQAAD(+43.04)K(+45.03)YLYVD(+43.04)	-	M	AQQAADKYLYVD	K	Acetylation (Protein N-term); ethanolamine (DE); acetyl-d3 (K); ethanolamine (DE)	P35579	1556.79	12
750	A(+42.01)QQAAD(+43.04)K(+45.03)YLYVD(+43.04)K(+45.03)	-	M	AQQAADKYLYVDK	N	Acetylation (Protein N-term); ethanolamine (DE); acetyl-d3 (K); ethanolamine (DE); acetyl-d3 (K)	P35579	1729.92	13
751	A(+42.01)QQAAD(+43.04)K(+45.03)YLYVD(+43.04)K(+45.03)N	-	M	AQQAADKYLYVDKN	F	Acetylation (Protein N-term); ethanolamine (DE); acetyl-d3 (K); ethanolamine (DE); acetyl-d3 (K)	P35579	1843.96	14
752	A(+42.01)QQAAD(+43.04)K(+45.03)YLYVD(+43.04)K(+45.03)NFINNPL	-	M	AQQAADKYLYVDKNFINNPL	A	Acetylation (Protein N-term); ethanolamine (DE); acetyl-d3 (K); ethanolamine (DE); acetyl-d3 (K)	P35579	2542.33	20
753	A(+42.01)QQAAD(+43.04)K(+45.03)YLYVDK(+45.03)(+43.04)	-	M	AQQAADKYLYVDK	N	Acetylation (Protein N-term); ethanolamine (DE); acetyl-d3 (K); acetyl-d3 (K); ethanolamine (C-term)	P35579	1729.92	13
754	A(+42.01)QVAM(+15.99)STLPVE(+43.04)D(+43.04)	-	M	AQVAMSTLPVED	E	Acetylation (Protein N-term); Oxidation (M); ethanolamine (DE); ethanolamine (DE)	P78347	1403.7	12
755	A(+42.01)QWNQLQQLD(+43.04)T	-	M	AQWNQLQQLDT	R	Acetylation (Protein N-term); ethanolamine (DE)	P40763	1428.7	11
756	A(+42.01)QYK(+45.03)GAASE(+43.04)AG	-	M	AQYKGAASEAG	R	Acetylation (Protein N-term); acetyl-d3 (K); ethanolamine (DE)	Q14320	1181.58	11
757	A(+42.01)SAC(+57.02)GAPGPGGAL	-	M	ASACGAPGPGGAL	G	Acetylation (Protein N-term); Carbamidomethylation	O15357	1126.51	13
758	A(+42.01)SAC(+57.02)GAPGPGGALGSQAPSWYH	-	M	ASACGAPGPGGALGSQAPSWYH	R	Acetylation (Protein N-term); Carbamidomethylation	O15357	2139.94	22
759	A(+42.01)SALE(+43.04)QFVNSV	-	M	ASALEQFVNSV	R	Acetylation (Protein N-term); ethanolamine (DE)	Q9UNS2	1248.63	11
760	A(+42.01)SASGAM(+15.99)AK(+45.03)H	-	M	ASASGAMAKH	E	Acetylation (Protein N-term); Oxidation (M); acetyl-d3 (K)	Q9P0L0	1032.47	10
761	A(+42.01)SASGAM(+15.99)AK(+45.03)HE(+43.04)QIL	-	M	ASASGAMAKHEQIL	V	Acetylation (Protein N-term); Oxidation (M); acetyl-d3 (K); ethanolamine (DE)	Q9P0L0	1558.79	14
762	A(+42.01)SASGAMAK(+45.03)H	-	M	ASASGAMAKH	E	Acetylation (Protein N-term); acetyl-d3 (K)	Q9P0L0	1016.48	10
763	A(+42.01)SASYHISNL	-	M	ASASYHISNL	L	Acetylation (Protein N-term)	Q86VP6	1103.52	10
764	A(+42.01)SASYHISNLL	-	M	ASASYHISNLL	E	Acetylation (Protein N-term)	Q86VP6	1216.61	11
765	A(+42.01)SASYHISNLLE(+43.04)K(+45.03)M(+15.99)TSSD(+43.04)K(+45.03)D(+43.04)F	-	M	ASASYHISNLLEKMTSSDKDF	R	Acetylation (Protein N-term); ethanolamine (DE); acetyl-d3 (K); Oxidation (M); ethanolamine (DE); more	Q86VP6	2620.3	21
766	A(+42.01)SASYHISNLLE(+43.04)K(+45.03)M(+15.99)TSSD(+43.04)K(+45.03)DF(+43.04)	-	M	ASASYHISNLLEKMTSSDKDF	R	Acetylation (Protein N-term); ethanolamine (DE); acetyl-d3 (K); Oxidation (M); ethanolamine (DE); more	Q86VP6	2620.3	21
767	A(+42.01)SAVLSSVPTTAS	-	M	ASAVLSSVPTTAS	R	Acetylation (Protein N-term)	Q5VSY0	1231.63	13
768	A(+42.01)SAVSPANLPAVLLQP	-	M	ASAVSPANLPAVLLQP	R	Acetylation (Protein N-term)	P51610	1588.88	16
769	A(+42.01)SAVSPANLPAVLLQPRWK(+45.03)	-	M	ASAVSPANLPAVLLQPRWK	R	Acetylation (Protein N-term); acetyl-d3 (K)	P51610	2104.19	19
770	A(+42.01)SC(+57.02)ASID(+43.04)IE(+43.04)D(+43.04)ATQHL	-	M	ASCASIDIEDATQHL	R	Acetylation (Protein N-term); Carbamidomethylation; ethanolamine (DE); ethanolamine (DE); ethanolamine (DE)	Q6P2E9	1800.87	15
771	A(+42.01)SE(+43.04)D(+43.04)IAK(+45.03)LAE(+43.04)TL	-	M	ASEDIAKLAETL	A	Acetylation (Protein N-term); ethanolamine (DE); ethanolamine (DE); acetyl-d3 (K); ethanolamine (DE)	P46060	1475.83	12
772	A(+42.01)SE(+43.04)E(+43.04)LQK(+45.03)D(+43.04)LE(+43.04)	-	M	ASEELQKDLE	E	Acetylation (Protein N-term); ethanolamine (DE); ethanolamine (DE); acetyl-d3 (K); ethanolamine (DE); more	Q9HB71	1419.76	10
773	A(+42.01)SE(+43.04)E(+43.04)LQK(+45.03)D(+43.04)LE(+43.04)E(+43.04)VK(+45.03)VL	-	M	ASEELQKDLEEVKVL	L	Acetylation (Protein N-term); ethanolamine (DE); ethanolamine (DE); acetyl-d3 (K); ethanolamine (DE); more	Q9HB71	2076.19	15
774	A(+42.01)SFVTE(+43.04)VLAHSG	-	M	ASFVTEVLAHSG	R	Acetylation (Protein N-term); ethanolamine (DE)	O43264	1301.66	12
775	A(+42.01)SGAD(+43.04)SK(+45.03)GD(+43.04)D(+43.04)L	-	M	ASGADSKGDDL	S	Acetylation (Protein N-term); ethanolamine (DE); acetyl-d3 (K); ethanolamine (DE); ethanolamine (DE)	P55072	1250.62	11
776	A(+42.01)SGAD(+43.04)SK(+45.03)GD(+43.04)D(+43.04)LST	-	M	ASGADSKGDDLST	A	Acetylation (Protein N-term); ethanolamine (DE); acetyl-d3 (K); ethanolamine (DE); ethanolamine (DE)	P55072	1438.7	13
777	A(+42.01)SGAD(+43.04)SK(+45.03)GD(+43.04)D(+43.04)LSTA	-	M	ASGADSKGDDLSTA	I	Acetylation (Protein N-term); ethanolamine (DE); acetyl-d3 (K); ethanolamine (DE); ethanolamine (DE)	P55072	1509.73	14
778	A(+42.01)SGAD(+43.04)SK(+45.03)GD(+43.04)D(+43.04)LSTAILK(+45.03)QK(+45.03)N	-	M	ASGADSKGDDLSTAILKQKN	R	Acetylation (Protein N-term); ethanolamine (DE); acetyl-d3 (K); ethanolamine (DE); ethanolamine (DE); more	P55072	2324.25	20
779	A(+42.01)SGAD(+43.04)SK(+45.03)GD(+43.04)D(+43.04)LSTAILK(+45.03)QK(+45.03)NRPN	-	M	ASGADSKGDDLSTAILKQKNRPN	R	Acetylation (Protein N-term); ethanolamine (DE); acetyl-d3 (K); ethanolamine (DE); ethanolamine (DE); more	P55072	2691.45	23
780	A(+42.01)SGAD(+43.04)SK(+45.03)GD(+43.04)DL(+43.04)	-	M	ASGADSKGDDL	S	Acetylation (Protein N-term); ethanolamine (DE); acetyl-d3 (K); ethanolamine (DE); ethanolamine (C-term)	P55072	1250.62	11
781	A(+42.01)SGAD(+43.04)SK(+45.03)GD(+43.04)DLSTAILK(+45.03)QK(+45.03)N	-	M	ASGADSKGDDLSTAILKQKN	R	Acetylation (Protein N-term); ethanolamine (DE); acetyl-d3 (K); ethanolamine (DE); acetyl-d3 (K); more	P55072	2281.21	20
782	A(+42.01)SGAD(+43.04)SK(+45.03)GD(+43.04)DLSTAILK(+45.03)QK(+45.03)NRPN	-	M	ASGADSKGDDLSTAILKQKNRPN	R	Acetylation (Protein N-term); ethanolamine (DE); acetyl-d3 (K); ethanolamine (DE); acetyl-d3 (K); more	P55072	2648.41	23
783	A(+42.01)SGAD(+43.04)SK(+45.03)GDD(+43.04)LSTAILK(+45.03)QK(+45.03)N	-	M	ASGADSKGDDLSTAILKQKN	R	Acetylation (Protein N-term); ethanolamine (DE); acetyl-d3 (K); ethanolamine (DE); acetyl-d3 (K); more	P55072	2281.21	20
784	A(+42.01)SGAD(+43.04)SK(+45.03)GDD(+43.04)LSTAILK(+45.03)QK(+45.03)NRPN	-	M	ASGADSKGDDLSTAILKQKNRPN	R	Acetylation (Protein N-term); ethanolamine (DE); acetyl-d3 (K); ethanolamine (DE); acetyl-d3 (K); more	P55072	2648.41	23
785	A(+42.01)SGAD(+43.04)SK(+45.03)GDDLSTAILK(+45.03)QK(+45.03)NRPN	-	M	ASGADSKGDDLSTAILKQKNRPN	R	Acetylation (Protein N-term); ethanolamine (DE); acetyl-d3 (K); acetyl-d3 (K); acetyl-d3 (K)	P55072	2605.37	23
786	A(+42.01)SGADSK(+45.03)GD(+43.04)D(+43.04)LSTAILK(+45.03)QK(+45.03)NRPN	-	M	ASGADSKGDDLSTAILKQKNRPN	R	Acetylation (Protein N-term); acetyl-d3 (K); ethanolamine (DE); ethanolamine (DE); acetyl-d3 (K); more	P55072	2648.41	23
787	A(+42.01)SGAGGVGGGGGGK(+45.03)I	-	M	ASGAGGVGGGGGGKI	R	Acetylation (Protein N-term); acetyl-d3 (K)	P49790	1187.6	15
788	A(+42.01)SGAYNPYIE(+43.04)IIE(+43.04)QPRQ	-	M	ASGAYNPYIEIIEQPRQ	R	Acetylation (Protein N-term); ethanolamine (DE); ethanolamine (DE)	Q04864	2076.06	17
789	A(+42.01)SGGSGGVSVPALWSE(+43.04)VN	-	M	ASGGSGGVSVPALWSEVN	R	Acetylation (Protein N-term); ethanolamine (DE)	O76094	1757.86	18
790	A(+42.01)SGSGTK(+45.03)NLD(+43.04)F	-	M	ASGSGTKNLDF	R	Acetylation (Protein N-term); acetyl-d3 (K); ethanolamine (DE)	Q96NC0	1225.6	11
791	A(+42.01)SGSGTK(+45.03)NLD(+43.04)FR	-	M	ASGSGTKNLDFR	R	Acetylation (Protein N-term); acetyl-d3 (K); ethanolamine (DE)	Q96NC0	1381.7	12
792	A(+42.01)SGSGTK(+45.03)NLDF(+43.04)	-	M	ASGSGTKNLDF	R	Acetylation (Protein N-term); acetyl-d3 (K); ethanolamine (C-term)	Q96NC0	1225.6	11
793	A(+42.01)SGSGTK(+45.03)NLDFR	-	M	ASGSGTKNLDFR	R	Acetylation (Protein N-term); acetyl-d3 (K)	Q96NC0	1338.66	12
794	A(+42.01)SGTTTTAVK(+45.03)IGIIGGTGLD(+43.04)D(+43.04)PE(+43.04)ILE(+43.04)G	-	M	ASGTTTTAVKIGIIGGTGLDDPEILEG	R	Acetylation (Protein N-term); acetyl-d3 (K); ethanolamine (DE); ethanolamine (DE); ethanolamine (DE); more	Q13126	2844.55	27
795	A(+42.01)SGTTTTAVK(+45.03)IGIIGGTGLD(+43.04)D(+43.04)PE(+43.04)ILEG(+43.04)	-	M	ASGTTTTAVKIGIIGGTGLDDPEILEG	R	Acetylation (Protein N-term); acetyl-d3 (K); ethanolamine (DE); ethanolamine (DE); ethanolamine (DE); more	Q13126	2844.55	27
796	A(+42.01)SGVAVSD(+43.04)	-	M	ASGVAVSD	G	Acetylation (Protein N-term); ethanolamine (DE)	P23528	789.387	8
797	A(+42.01)SGVAVSD(+43.04)GVIK(+45.03)	-	M	ASGVAVSDGVIK	V	Acetylation (Protein N-term); ethanolamine (DE); acetyl-d3 (K)	P23528	1231.69	12
798	A(+42.01)SGVAVSD(+43.04)GVIK(+45.03)VF	-	M	ASGVAVSDGVIKVF	N	Acetylation (Protein N-term); ethanolamine (DE); acetyl-d3 (K)	P23528	1477.82	14
799	A(+42.01)SGVAVSD(+43.04)GVIK(+45.03)VFN	-	M	ASGVAVSDGVIKVFN	D	Acetylation (Protein N-term); ethanolamine (DE); acetyl-d3 (K)	P23528	1591.86	15
800	A(+42.01)SGVAVSD(+43.04)GVIK(+45.03)VFND(+43.04)	-	M	ASGVAVSDGVIKVFND	M	Acetylation (Protein N-term); ethanolamine (DE); acetyl-d3 (K); ethanolamine (DE)	P23528	1749.93	16
801	A(+42.01)SGVAVSD(+43.04)GVIK(+45.03)VFND(+43.04)M(+15.99)	-	M	ASGVAVSDGVIKVFNDM	K	Acetylation (Protein N-term); ethanolamine (DE); acetyl-d3 (K); ethanolamine (DE); Oxidation (M)	P23528	1896.97	17
802	A(+42.01)SGVAVSD(+43.04)GVIK(+45.03)VFND(+43.04)M(+15.99)K(+45.03)V	-	M	ASGVAVSDGVIKVFNDMKV	R	Acetylation (Protein N-term); ethanolamine (DE); acetyl-d3 (K); ethanolamine (DE); Oxidation (M); more	P23528	2169.16	19
803	A(+42.01)SGVAVSD(+43.04)GVIK(+45.03)VFND(+43.04)MK(+45.03)V	-	M	ASGVAVSDGVIKVFNDMKV	R	Acetylation (Protein N-term); ethanolamine (DE); acetyl-d3 (K); ethanolamine (DE); acetyl-d3 (K)	P23528	2153.17	19
804	A(+42.01)SGVAVSD(+43.04)GVIK(+45.03)VFNDM(+15.99)K(+45.03)V	-	M	ASGVAVSDGVIKVFNDMKV	R	Acetylation (Protein N-term); ethanolamine (DE); acetyl-d3 (K); Oxidation (M); acetyl-d3 (K)	P23528	2126.12	19
805	A(+42.01)SGVAVSDGVIK(+45.03)	-	M	ASGVAVSDGVIK	V	Acetylation (Protein N-term); acetyl-d3 (K)	P23528	1188.64	12
806	A(+42.01)SGVAVSDGVIK(+45.03)VFND(+43.04)M(+15.99)K(+45.03)V	-	M	ASGVAVSDGVIKVFNDMKV	R	Acetylation (Protein N-term); acetyl-d3 (K); ethanolamine (DE); Oxidation (M); acetyl-d3 (K)	P23528	2126.12	19
807	A(+42.01)SGVAVSDGVIK(+45.03)VFND(+43.04)MK(+45.03)V	-	M	ASGVAVSDGVIKVFNDMKV	R	Acetylation (Protein N-term); acetyl-d3 (K); ethanolamine (DE); acetyl-d3 (K)	P23528	2110.12	19
808	A(+42.01)SGVAVSDGVIK(+45.03)VFNDM(+15.99)K(+45.03)V(+43.04)	-	M	ASGVAVSDGVIKVFNDMKV	R	Acetylation (Protein N-term); acetyl-d3 (K); Oxidation (M); acetyl-d3 (K); ethanolamine (C-term)	P23528	2126.12	19
809	A(+42.01)SGVQVAD(+43.04)	-	M	ASGVQVAD	E	Acetylation (Protein N-term); ethanolamine (DE)	P60981	830.413	8
810	A(+42.01)SGVQVAD(+43.04)E(+43.04)VC(+57.02)	-	M	ASGVQVADEVC	R	Acetylation (Protein N-term); ethanolamine (DE); ethanolamine (DE); Carbamidomethylation	P60981	1261.6	11
811	A(+42.01)SGVQVAD(+43.04)EVC(+57.02)	-	M	ASGVQVADEVC	R	Acetylation (Protein N-term); ethanolamine (DE); Carbamidomethylation	P60981	1218.56	11
812	A(+42.01)SGVQVADE(+43.04)VC(+57.02)	-	M	ASGVQVADEVC	R	Acetylation (Protein N-term); ethanolamine (DE); Carbamidomethylation	P60981	1218.56	11
813	A(+42.01)SIWVGH	-	M	ASIWVGH	R	Acetylation (Protein N-term)	P12429	810.402	7
814	A(+42.01)SK(+45.03)E(+43.04)M(+15.99)FE(+43.04)D(+43.04)TVEE(+43.04)(+43.04)	-	M	ASKEMFEDTVEE	R	Acetylation (Protein N-term); acetyl-d3 (K); ethanolamine (DE); Oxidation (M); ethanolamine (DE); more	Q16576	1731.84	12
815	A(+42.01)SK(+45.03)E(+43.04)MFE(+43.04)D(+43.04)TVE(+43.04)E(+43.04)	-	M	ASKEMFEDTVEE	R	Acetylation (Protein N-term); acetyl-d3 (K); ethanolamine (DE); ethanolamine (DE); ethanolamine (DE); more	Q16576	1715.85	12
816	A(+42.01)SK(+45.03)E(+43.04)MFE(+43.04)D(+43.04)TVEE(+43.04)(+43.04)	-	M	ASKEMFEDTVEE	R	Acetylation (Protein N-term); acetyl-d3 (K); ethanolamine (DE); ethanolamine (DE); ethanolamine (DE); more	Q16576	1715.85	12
817	A(+42.01)SLLAK(+45.03)D(+43.04)AYLQSL	-	M	ASLLAKDAYLQSL	A	Acetylation (Protein N-term); acetyl-d3 (K); ethanolamine (DE)	O75683	1521.85	13
818	A(+42.01)SLLK(+45.03)VD(+43.04)QE(+43.04)VK(+45.03)	-	M	ASLLKVDQEVK	L	Acetylation (Protein N-term); acetyl-d3 (K); ethanolamine (DE); ethanolamine (DE); acetyl-d3 (K)	P61289	1446.86	11
819	A(+42.01)SLTVK(+45.03)AYLLGK(+45.03)E(+43.04)D(+43.04)AA	-	M	ASLTVKAYLLGKEDAA	R	Acetylation (Protein N-term); acetyl-d3 (K); acetyl-d3 (K); ethanolamine (DE); ethanolamine (DE)	Q13501	1867.06	16
820	A(+42.01)SM(+15.99)GTLAFD(+43.04)E(+43.04)YG	-	M	ASMGTLAFDEYG	R	Acetylation (Protein N-term); Oxidation (M); ethanolamine (DE); ethanolamine (DE)	P48643	1404.62	12
821	A(+42.01)SM(+15.99)GTLAFD(+43.04)EYG	-	M	ASMGTLAFDEYG	R	Acetylation (Protein N-term); Oxidation (M); ethanolamine (DE)	P48643	1361.58	12
822	A(+42.01)SM(+15.99)GTLAFDE(+43.04)YG	-	M	ASMGTLAFDEYG	R	Acetylation (Protein N-term); Oxidation (M); ethanolamine (DE)	P48643	1361.58	12
823	A(+42.01)SMGTLAFD(+43.04)E(+43.04)YG	-	M	ASMGTLAFDEYG	R	Acetylation (Protein N-term); ethanolamine (DE); ethanolamine (DE)	P48643	1388.63	12
824	A(+42.01)SND(+43.04)YTQQATQ	-	M	ASNDYTQQATQ	S	Acetylation (Protein N-term); ethanolamine (DE)	P35637	1310.57	11
825	A(+42.01)SND(+43.04)YTQQATQSY	-	M	ASNDYTQQATQSY	G	Acetylation (Protein N-term); ethanolamine (DE)	P35637	1560.67	13
826	A(+42.01)SND(+43.04)YTQQATQSYGAYPTQPGQGY	-	M	ASNDYTQQATQSYGAYPTQPGQGY	S	Acetylation (Protein N-term); ethanolamine (DE)	P35637	2680.17	24
827	A(+42.01)SNFK(+45.03)K(+45.03)ANM(+15.99)ASSSQ	-	M	ASNFKKANMASSSQ	R	Acetylation (Protein N-term); acetyl-d3 (K); acetyl-d3 (K); Oxidation (M)	P41208	1617.76	14
828	A(+42.01)SNFK(+45.03)K(+45.03)ANMASSSQ	-	M	ASNFKKANMASSSQ	R	Acetylation (Protein N-term); acetyl-d3 (K); acetyl-d3 (K)	P41208	1601.76	14
829	A(+42.01)SNK(+45.03)TTLQK(+45.03)M	-	M	ASNKTTLQKM	G	Acetylation (Protein N-term); acetyl-d3 (K); acetyl-d3 (K)	Q13185	1252.66	10
830	A(+42.01)SNK(+45.03)TTLQK(+45.03)M(+15.99)	-	M	ASNKTTLQKM	G	Acetylation (Protein N-term); acetyl-d3 (K); acetyl-d3 (K); Oxidation (M)	Q13185	1268.66	10
831	A(+42.01)SNK(+45.03)TTLQK(+45.03)M(+15.99)GK(+45.03)K(+45.03)QN	-	M	ASNKTTLQKMGKKQN	G	Acetylation (Protein N-term); acetyl-d3 (K); acetyl-d3 (K); Oxidation (M); acetyl-d3 (K); more	Q13185	1914.03	15
832	A(+42.01)SNK(+45.03)TTLQK(+45.03)M(+15.99)GK(+45.03)K(+45.03)QNGK(+45.03)SK(+45.03)K(+45.03)VE(+43.04)	-	M	ASNKTTLQKMGKKQNGKSKKVE	E	Acetylation (Protein N-term); acetyl-d3 (K); acetyl-d3 (K); Oxidation (M); acetyl-d3 (K); more	Q13185	2848.61	22
833	A(+42.01)SNK(+45.03)TTLQK(+45.03)M(+15.99)GK(+45.03)K(+45.03)QNGK(+45.03)SK(+45.03)K(+45.03)VE(+43.04)E(+43.04)A	-	M	ASNKTTLQKMGKKQNGKSKKVEEA	E	Acetylation (Protein N-term); acetyl-d3 (K); acetyl-d3 (K); Oxidation (M); acetyl-d3 (K); more	Q13185	3091.73	24
834	A(+42.01)SNK(+45.03)TTLQK(+45.03)M(+15.99)GK(+45.03)K(+45.03)QNGK(+45.03)SK(+45.03)K(+45.03)VE(+43.04)E(+43.04)AE(+43.04)PE(+43.04)	-	M	ASNKTTLQKMGKKQNGKSKKVEEAEPE	E	Acetylation (Protein N-term); acetyl-d3 (K); acetyl-d3 (K); Oxidation (M); acetyl-d3 (K); more	Q13185	3532.95	27
835	A(+42.01)SNVTNK(+45.03)TD(+43.04)	-	M	ASNVTNKTD	P	Acetylation (Protein N-term); acetyl-d3 (K); ethanolamine (DE)	P07910	1078.53	9
836	A(+42.01)SNVTNK(+45.03)TD(+43.04)P	-	M	ASNVTNKTDP	R	Acetylation (Protein N-term); acetyl-d3 (K); ethanolamine (DE)	P07910	1175.59	10
837	A(+42.01)SNVTNK(+45.03)TD(+43.04)PR	-	M	ASNVTNKTDPR	S	Acetylation (Protein N-term); acetyl-d3 (K); ethanolamine (DE)	P07910	1331.69	11
838	A(+42.01)SNVTNK(+45.03)TD(+43.04)PRSM(+15.99)NS	-	M	ASNVTNKTDPRSMNS	R	Acetylation (Protein N-term); acetyl-d3 (K); ethanolamine (DE); Oxidation (M)	P07910	1766.83	15
839	A(+42.01)SNVTNK(+45.03)TD(+43.04)PRSMNS	-	M	ASNVTNKTDPRSMNS	R	Acetylation (Protein N-term); acetyl-d3 (K); ethanolamine (DE)	P07910	1750.83	15
840	A(+42.01)SNVTNK(+45.03)TDP	-	M	ASNVTNKTDP	R	Acetylation (Protein N-term); acetyl-d3 (K)	P07910	1132.54	10
841	A(+42.01)SNVTNK(+45.03)TDPRSM(+15.99)NS	-	M	ASNVTNKTDPRSMNS	R	Acetylation (Protein N-term); acetyl-d3 (K); Oxidation (M)	P07910	1723.79	15
842	A(+42.01)SNVTNK(+45.03)TDPRSMNS	-	M	ASNVTNKTDPRSMNS	R	Acetylation (Protein N-term); acetyl-d3 (K)	P07910	1707.79	15
843	A(+42.01)SQSQGIQQLLQAE(+43.04)K(+45.03)	-，-	M，M	ASQSQGIQQLLQAEK	R，R	Acetylation (Protein N-term); ethanolamine (DE); acetyl-d3 (K)	O75348，O95670	1757.94	15
844	A(+42.01)SSAQSGGSSGGPAVPTVQ	-	M	ASSAQSGGSSGGPAVPTVQ	R	Acetylation (Protein N-term)	Q7KZF4	1685.79	19
845	A(+42.01)SSD(+43.04)IQVK(+45.03)	-	M	ASSDIQVK	E	Acetylation (Protein N-term); ethanolamine (DE); acetyl-d3 (K)	P16949	976.527	8
846	A(+42.01)SSD(+43.04)IQVK(+45.03)E(+43.04)	-	M	ASSDIQVKE	L	Acetylation (Protein N-term); ethanolamine (DE); acetyl-d3 (K); ethanolamine (DE)	P16949	1148.61	9
847	A(+42.01)SSD(+43.04)IQVK(+45.03)E(+43.04)L	-	M	ASSDIQVKEL	E	Acetylation (Protein N-term); ethanolamine (DE); acetyl-d3 (K); ethanolamine (DE)	P16949	1261.7	10
848	A(+42.01)SSD(+43.04)IQVK(+45.03)E(+43.04)LE(+43.04)K(+45.03)	-	M	ASSDIQVKELEK	R	Acetylation (Protein N-term); ethanolamine (DE); acetyl-d3 (K); ethanolamine (DE); ethanolamine (DE); more	P16949	1606.9	12
849	A(+42.01)SSD(+43.04)IQVK(+45.03)E(+43.04)LEK(+45.03)	-	M	ASSDIQVKELEK	R	Acetylation (Protein N-term); ethanolamine (DE); acetyl-d3 (K); ethanolamine (DE); acetyl-d3 (K)	P16949	1563.86	12
850	A(+42.01)SSD(+43.04)IQVK(+45.03)E(+43.04)LEK(+45.03)(+43.04)	-	M	ASSDIQVKELEK	R	Acetylation (Protein N-term); ethanolamine (DE); acetyl-d3 (K); ethanolamine (DE); acetyl-d3 (K); more	P16949	1606.9	12
851	A(+42.01)SSD(+43.04)IQVK(+45.03)EL(+43.04)	-	M	ASSDIQVKEL	E	Acetylation (Protein N-term); ethanolamine (DE); acetyl-d3 (K); ethanolamine (C-term)	P16949	1261.7	10
852	A(+42.01)SSD(+43.04)IQVK(+45.03)ELE(+43.04)K(+45.03)	-	M	ASSDIQVKELEK	R	Acetylation (Protein N-term); ethanolamine (DE); acetyl-d3 (K); ethanolamine (DE); acetyl-d3 (K)	P16949	1563.86	12
853	A(+42.01)SSDIQVK(+45.03)E(+43.04)LE(+43.04)K(+45.03)	-	M	ASSDIQVKELEK	R	Acetylation (Protein N-term); acetyl-d3 (K); ethanolamine (DE); ethanolamine (DE); acetyl-d3 (K)	P16949	1563.86	12
854	A(+42.01)SSDIQVK(+45.03)E(+43.04)LEK(+45.03)(+43.04)	-	M	ASSDIQVKELEK	R	Acetylation (Protein N-term); acetyl-d3 (K); ethanolamine (DE); acetyl-d3 (K); ethanolamine (C-term)	P16949	1563.86	12
855	A(+42.01)SSGAGD(+43.04)PLD(+43.04)SK(+45.03)	-	M	ASSGAGDPLDSK	R	Acetylation (Protein N-term); ethanolamine (DE); ethanolamine (DE); acetyl-d3 (K)	Q9Y2R0	1276.63	12
856	A(+42.01)SSLNE(+43.04)D(+43.04)PE(+43.04)GS	-	M	ASSLNEDPEGS	R	Acetylation (Protein N-term); ethanolamine (DE); ethanolamine (DE); ethanolamine (DE)	Q9Y530	1275.59	11
857	A(+42.01)SSVGNVAD(+43.04)STE(+43.04)PTK(+45.03)	-	M	ASSVGNVADSTEPTK	R	Acetylation (Protein N-term); ethanolamine (DE); ethanolamine (DE); acetyl-d3 (K)	O15294	1634.82	15
858	A(+42.01)STD(+43.04)YSTY	-	M	ASTDYSTY	S	Acetylation (Protein N-term); ethanolamine (DE)	Q01844	991.413	8
859	A(+42.01)STD(+43.04)YSTYSQ	-	M	ASTDYSTYSQ	A	Acetylation (Protein N-term); ethanolamine (DE)	Q01844	1206.5	10
860	A(+42.01)STD(+43.04)YSTYSQAAAQQGY	-	M	ASTDYSTYSQAAAQQGY	S	Acetylation (Protein N-term); ethanolamine (DE)	Q01844	1895.82	17
861	A(+42.01)STD(+43.04)YSTYSQAAAQQGYSAYTAQPTQGY	-	M	ASTDYSTYSQAAAQQGYSAYTAQPTQGY	A	Acetylation (Protein N-term); ethanolamine (DE)	Q01844	3063.34	28
862	A(+42.01)STNAE(+43.04)SQLQ	-	M	ASTNAESQLQ	R	Acetylation (Protein N-term); ethanolamine (DE)	Q9BQS8	1132.54	10
863	A(+42.01)STSYD(+43.04)YC(+57.02)	-	M	ASTSYDYC	R	Acetylation (Protein N-term); ethanolamine (DE); Carbamidomethylation	Q10589	1050.4	8
864	A(+42.01)SVAVD(+43.04)PQPSVVT	-	M	ASVAVDPQPSVVT	R	Acetylation (Protein N-term); ethanolamine (DE)	Q99541	1353.71	13
865	A(+42.01)SVSSATFSGHGA	-	M	ASVSSATFSGHGA	R	Acetylation (Protein N-term)	Q7Z4H3	1219.55	13
866	A(+42.01)SVTLSE(+43.04)AE(+43.04)K(+45.03)VYIVHGVQE(+43.04)D(+43.04)L	-	M	ASVTLSEAEKVYIVHGVQEDL	R	Acetylation (Protein N-term); ethanolamine (DE); ethanolamine (DE); acetyl-d3 (K); ethanolamine (DE); more	Q15024	2545.38	21
867	A(+42.01)SVTLSE(+43.04)AE(+43.04)K(+45.03)VYIVHGVQE(+43.04)DL(+43.04)	-	M	ASVTLSEAEKVYIVHGVQEDL	R	Acetylation (Protein N-term); ethanolamine (DE); ethanolamine (DE); acetyl-d3 (K); ethanolamine (DE); more	Q15024	2545.38	21
868	A(+42.01)TAATE(+43.04)E(+43.04)PFPFHGLLPK(+45.03)K(+45.03)E(+43.04)TGAASFLC(+57.02)	-	M	ATAATEEPFPFHGLLPKKETGAASFLC	R	Acetylation (Protein N-term); ethanolamine (DE); ethanolamine (DE); acetyl-d3 (K); acetyl-d3 (K); more	P29144	3150.63	27
869	A(+42.01)TAATSPALK(+45.03)	-	M	ATAATSPALK	R	Acetylation (Protein N-term); acetyl-d3 (K)	Q8WTW3	1016.56	10
870	A(+42.01)TAE(+43.04)VLNIGK(+45.03)K(+45.03)L	-	M	ATAEVLNIGKKL	Y	Acetylation (Protein N-term); ethanolamine (DE); acetyl-d3 (K); acetyl-d3 (K)	P22234	1430.86	12
871	A(+42.01)TAE(+43.04)VLNIGK(+45.03)K(+45.03)LY	-	M	ATAEVLNIGKKLY	E	Acetylation (Protein N-term); ethanolamine (DE); acetyl-d3 (K); acetyl-d3 (K)	P22234	1593.92	13
872	A(+42.01)TAE(+43.04)VLNIGK(+45.03)K(+45.03)LYE(+43.04)	-	M	ATAEVLNIGKKLYE	G	Acetylation (Protein N-term); ethanolamine (DE); acetyl-d3 (K); acetyl-d3 (K); ethanolamine (DE)	P22234	1766.01	14
873	A(+42.01)TAE(+43.04)VLNIGK(+45.03)K(+45.03)LYE(+43.04)GK(+45.03)TK(+45.03)	-	M	ATAEVLNIGKKLYEGKTK	E	Acetylation (Protein N-term); ethanolamine (DE); acetyl-d3 (K); acetyl-d3 (K); ethanolamine (DE); more	P22234	2270.33	18
874	A(+42.01)TAE(+43.04)VLNIGK(+45.03)K(+45.03)LYE(+43.04)GK(+45.03)TK(+45.03)(+43.04)	-	M	ATAEVLNIGKKLYEGKTK	E	Acetylation (Protein N-term); ethanolamine (DE); acetyl-d3 (K); acetyl-d3 (K); ethanolamine (DE); more	P22234	2313.37	18
875	A(+42.01)TAE(+43.04)VLNIGK(+45.03)K(+45.03)LYE(+43.04)GK(+45.03)TK(+45.03)E(+43.04)VY	-	M	ATAEVLNIGKKLYEGKTKEVY	E	Acetylation (Protein N-term); ethanolamine (DE); acetyl-d3 (K); acetyl-d3 (K); ethanolamine (DE); more	P22234	2704.54	21
876	A(+42.01)TAE(+43.04)VLNIGK(+45.03)K(+45.03)LYE(+43.04)GK(+45.03)TK(+45.03)E(+43.04)VY(+43.04)	-	M	ATAEVLNIGKKLYEGKTKEVY	E	Acetylation (Protein N-term); ethanolamine (DE); acetyl-d3 (K); acetyl-d3 (K); ethanolamine (DE); more	P22234	2747.59	21
877	A(+42.01)TATPVPP	-	M	ATATPVPP	R	Acetylation (Protein N-term)	P20700	794.417	8
878	A(+42.01)TD(+43.04)E(+43.04)LATK(+45.03)LS	-	M	ATDELATKLS	R	Acetylation (Protein N-term); ethanolamine (DE); ethanolamine (DE); acetyl-d3 (K)	Q96C19	1220.67	10
879	A(+42.01)TE(+43.04)E(+43.04)K(+45.03)K(+45.03)PE(+43.04)TE(+43.04)AA	-	M	ATEEKKPETEAA	R	Acetylation (Protein N-term); ethanolamine (DE); ethanolamine (DE); acetyl-d3 (K); acetyl-d3 (K); more	P61964	1606.87	12
880	A(+42.01)TE(+43.04)GM(+15.99)ILTNHD(+43.04)HQI	-	M	ATEGMILTNHDHQI	R	Acetylation (Protein N-term); ethanolamine (DE); Oxidation (M); ethanolamine (DE)	Q9NQX3	1722.84	14
881	A(+42.01)TE(+43.04)HPE(+43.04)PPK(+45.03)AE(+43.04)L	-	M	ATEHPEPPKAEL	Q	Acetylation (Protein N-term); ethanolamine (DE); ethanolamine (DE); acetyl-d3 (K); ethanolamine (DE)	Q13435	1533.82	12
882	A(+42.01)TE(+43.04)TVE(+43.04)LHK(+45.03)LK(+45.03)L	-	M	ATETVELHKLKL	A	Acetylation (Protein N-term); ethanolamine (DE); ethanolamine (DE); acetyl-d3 (K); acetyl-d3 (K)	P82979	1598.95	12
883	A(+42.01)TE(+43.04)TVE(+43.04)LHK(+45.03)LK(+45.03)LA	-	M	ATETVELHKLKLA	E	Acetylation (Protein N-term); ethanolamine (DE); ethanolamine (DE); acetyl-d3 (K); acetyl-d3 (K)	P82979	1669.99	13
884	A(+42.01)TE(+43.04)TVE(+43.04)LHK(+45.03)LK(+45.03)LAE(+43.04)LK(+45.03)QE(+43.04)C(+57.02)LA	-	M	ATETVELHKLKLAELKQECLA	R	Acetylation (Protein N-term); ethanolamine (DE); ethanolamine (DE); acetyl-d3 (K); acetyl-d3 (K); more	P82979	2772.58	21
885	A(+42.01)TGANATPLD(+43.04)FPSK(+45.03)K(+45.03)	-	M	ATGANATPLDFPSKK	R	Acetylation (Protein N-term); ethanolamine (DE); acetyl-d3 (K); acetyl-d3 (K)	Q15637	1691.9	15
886	A(+42.01)TGTGK(+45.03)HK(+45.03)LL	-	M	ATGTGKHKLL	S	Acetylation (Protein N-term); acetyl-d3 (K); acetyl-d3 (K)	Q9H0E9	1156.67	10
887	A(+42.01)TK(+45.03)AVC(+57.02)VLK(+45.03)GD(+43.04)	-	M	ATKAVCVLKGD	G	Acetylation (Protein N-term); acetyl-d3 (K); Carbamidomethylation; acetyl-d3 (K); ethanolamine (DE)	P00441	1335.73	11
888	A(+42.01)TK(+45.03)AVC(+57.02)VLK(+45.03)GD(+43.04)GPVQ	-	M	ATKAVCVLKGDGPVQ	G	Acetylation (Protein N-term); acetyl-d3 (K); Carbamidomethylation; acetyl-d3 (K); ethanolamine (DE)	P00441	1716.94	15
889	A(+42.01)TK(+45.03)AVC(+57.02)VLK(+45.03)GD(+43.04)GPVQGIINF	-	M	ATKAVCVLKGDGPVQGIINF	E	Acetylation (Protein N-term); acetyl-d3 (K); Carbamidomethylation; acetyl-d3 (K); ethanolamine (DE)	P00441	2261.24	20
890	A(+42.01)TK(+45.03)AVC(+57.02)VLK(+45.03)GD(+43.04)GPVQGIINFE(+43.04)QK(+45.03)	-	M	ATKAVCVLKGDGPVQGIINFEQK	E	Acetylation (Protein N-term); acetyl-d3 (K); Carbamidomethylation; acetyl-d3 (K); ethanolamine (DE); more	P00441	2734.5	23
891	A(+42.01)TK(+45.03)AVC(+57.02)VLK(+45.03)GD(+43.04)GPVQGIINFE(+43.04)QK(+45.03)(+43.04)	-	M	ATKAVCVLKGDGPVQGIINFEQK	E	Acetylation (Protein N-term); acetyl-d3 (K); Carbamidomethylation; acetyl-d3 (K); ethanolamine (DE); more	P00441	2777.55	23
892	A(+42.01)TK(+45.03)AVC(+57.02)VLK(+45.03)GDGPVQGIINFE(+43.04)QK(+45.03)	-	M	ATKAVCVLKGDGPVQGIINFEQK	E	Acetylation (Protein N-term); acetyl-d3 (K); Carbamidomethylation; acetyl-d3 (K); ethanolamine (DE); more	P00441	2691.46	23
893	A(+42.01)TK(+45.03)C(+57.02)GNC(+57.02)GPGYSTPLE(+43.04)	-	M	ATKCGNCGPGYSTPLE	A	Acetylation (Protein N-term); acetyl-d3 (K); Carbamidomethylation; Carbamidomethylation; ethanolamine (DE)	Q13228	1840.82	16
894	A(+42.01)TK(+45.03)C(+57.02)GNC(+57.02)GPGYSTPLE(+43.04)AM(+15.99)K(+45.03)GP	-	M	ATKCGNCGPGYSTPLEAMKGP	R	Acetylation (Protein N-term); acetyl-d3 (K); Carbamidomethylation; Carbamidomethylation; ethanolamine (DE); more	Q13228	2386.09	21
895	A(+42.01)TK(+45.03)ID(+43.04)K(+45.03)E(+43.04)AC(+57.02)	-	M	ATKIDKEAC	R	Acetylation (Protein N-term); acetyl-d3 (K); ethanolamine (DE); acetyl-d3 (K); ethanolamine (DE); more	Q14019	1252.66	9
896	A(+42.01)TK(+45.03)ID(+43.04)K(+45.03)EAC(+57.02)	-	M	ATKIDKEAC	R	Acetylation (Protein N-term); acetyl-d3 (K); ethanolamine (DE); acetyl-d3 (K); Carbamidomethylation	Q14019	1209.62	9
897	A(+42.01)TK(+45.03)IDK(+45.03)E(+43.04)AC(+57.02)	-	M	ATKIDKEAC	R	Acetylation (Protein N-term); acetyl-d3 (K); acetyl-d3 (K); ethanolamine (DE); Carbamidomethylation	Q14019	1209.62	9
898	A(+42.01)TLK(+45.03)D(+43.04)QLIY	-	M	ATLKDQLIY	N	Acetylation (Protein N-term); acetyl-d3 (K); ethanolamine (DE)	P00338	1193.67	9
899	A(+42.01)TLK(+45.03)D(+43.04)QLIYN	-	M	ATLKDQLIYN	L	Acetylation (Protein N-term); acetyl-d3 (K); ethanolamine (DE)	P00338	1307.72	10
900	A(+42.01)TLK(+45.03)D(+43.04)QLIYNL	-	M	ATLKDQLIYNL	L	Acetylation (Protein N-term); acetyl-d3 (K); ethanolamine (DE)	P00338	1420.8	11
901	A(+42.01)TLK(+45.03)D(+43.04)QLIYNLLK(+45.03)	-	M	ATLKDQLIYNLLK	E	Acetylation (Protein N-term); acetyl-d3 (K); ethanolamine (DE); acetyl-d3 (K)	P00338	1707.01	13
902	A(+42.01)TLK(+45.03)D(+43.04)QLIYNLLK(+45.03)E	-	M	ATLKDQLIYNLLKE	E	Acetylation (Protein N-term); acetyl-d3 (K); ethanolamine (DE); acetyl-d3 (K)	P00338	1836.05	14
903	A(+42.01)TLK(+45.03)D(+43.04)QLIYNLLK(+45.03)E(+43.04)	-	M	ATLKDQLIYNLLKE	E	Acetylation (Protein N-term); acetyl-d3 (K); ethanolamine (DE); acetyl-d3 (K); ethanolamine (DE)	P00338	1879.09	14
904	A(+42.01)TLK(+45.03)D(+43.04)QLIYNLLK(+45.03)E(+43.04)(+43.04)	-	M	ATLKDQLIYNLLKE	E	Acetylation (Protein N-term); acetyl-d3 (K); ethanolamine (DE); acetyl-d3 (K); ethanolamine (C-term); more	P00338	1922.14	14
905	A(+42.01)TLK(+45.03)DQLIYNLLK(+45.03)	-	M	ATLKDQLIYNLLK	E	Acetylation (Protein N-term); acetyl-d3 (K); acetyl-d3 (K)	P00338	1663.97	13
906	A(+42.01)TLK(+45.03)DQLIYNLLK(+45.03)E(+43.04)	-	M	ATLKDQLIYNLLKE	E	Acetylation (Protein N-term); acetyl-d3 (K); acetyl-d3 (K); ethanolamine (DE)	P00338	1836.05	14
907	A(+42.01)TLK(+45.03)DQLIYNLLK(+45.03)E(+43.04)(+43.04)	-	M	ATLKDQLIYNLLKE	E	Acetylation (Protein N-term); acetyl-d3 (K); acetyl-d3 (K); ethanolamine (C-term); ethanolamine (DE)	P00338	1879.09	14
908	A(+42.01)TLK(+45.03)E(+43.04)K(+45.03)LIAPVA	-	M	ATLKEKLIAPVA	E	Acetylation (Protein N-term); acetyl-d3 (K); ethanolamine (DE); acetyl-d3 (K)	P07195	1427.89	12
909	A(+42.01)TLK(+45.03)E(+43.04)K(+45.03)LIAPVA(+43.04)	-	M	ATLKEKLIAPVA	E	Acetylation (Protein N-term); acetyl-d3 (K); ethanolamine (DE); acetyl-d3 (K); ethanolamine (C-term)	P07195	1470.93	12
910	A(+42.01)TLK(+45.03)E(+43.04)K(+45.03)LIAPVAE	-	M	ATLKEKLIAPVAE	E	Acetylation (Protein N-term); acetyl-d3 (K); ethanolamine (DE); acetyl-d3 (K)	P07195	1556.93	13
911	A(+42.01)TLK(+45.03)E(+43.04)K(+45.03)LIAPVAE(+43.04)	-	M	ATLKEKLIAPVAE	E	Acetylation (Protein N-term); acetyl-d3 (K); ethanolamine (DE); acetyl-d3 (K); ethanolamine (DE)	P07195	1599.97	13
912	A(+42.01)TLK(+45.03)E(+43.04)K(+45.03)LIAPVAE(+43.04)(+43.04)	-	M	ATLKEKLIAPVAE	E	Acetylation (Protein N-term); acetyl-d3 (K); ethanolamine (DE); acetyl-d3 (K); ethanolamine (C-term); more	P07195	1643.01	13
913	A(+42.01)TLK(+45.03)E(+43.04)K(+45.03)LIAPVAE(+43.04)E	-	M	ATLKEKLIAPVAEE	E	Acetylation (Protein N-term); acetyl-d3 (K); ethanolamine (DE); acetyl-d3 (K); ethanolamine (DE)	P07195	1729.01	14
914	A(+42.01)TLK(+45.03)E(+43.04)K(+45.03)LIAPVAE(+43.04)E(+43.04)	-	M	ATLKEKLIAPVAEE	E	Acetylation (Protein N-term); acetyl-d3 (K); ethanolamine (DE); acetyl-d3 (K); ethanolamine (DE); more	P07195	1772.06	14
915	A(+42.01)TLK(+45.03)E(+43.04)K(+45.03)LIAPVAE(+43.04)E(+43.04)(+43.04)	-	M	ATLKEKLIAPVAEE	E	Acetylation (Protein N-term); acetyl-d3 (K); ethanolamine (DE); acetyl-d3 (K); ethanolamine (DE); more	P07195	1815.1	14
916	A(+42.01)TLK(+45.03)E(+43.04)K(+45.03)LIAPVAE(+43.04)E(+43.04)E(+43.04)ATVPNNK(+45.03)ITVVGVGQVGM(+15.99)AC(+57.02)	-	M	ATLKEKLIAPVAEEEATVPNNKITVVGVGQVGMAC	A	Acetylation (Protein N-term); acetyl-d3 (K); ethanolamine (DE); acetyl-d3 (K); ethanolamine (DE); more	P07195	4001.19	35
917	A(+42.01)TLK(+45.03)E(+43.04)K(+45.03)LIAPVAE(+43.04)EE(+43.04)(+43.04)	-	M	ATLKEKLIAPVAEEE	A	Acetylation (Protein N-term); acetyl-d3 (K); ethanolamine (DE); acetyl-d3 (K); ethanolamine (DE); more	P07195	1944.14	15
918	A(+42.01)TLK(+45.03)E(+43.04)K(+45.03)LIAPVAEE(+43.04)	-	M	ATLKEKLIAPVAEE	E	Acetylation (Protein N-term); acetyl-d3 (K); ethanolamine (DE); acetyl-d3 (K); ethanolamine (DE)	P07195	1729.01	14
919	A(+42.01)TLK(+45.03)E(+43.04)K(+45.03)LIAPVAEE(+43.04)(+43.04)	-	M	ATLKEKLIAPVAEE	E	Acetylation (Protein N-term); acetyl-d3 (K); ethanolamine (DE); acetyl-d3 (K); ethanolamine (C-term); more	P07195	1772.06	14
920	A(+42.01)TLK(+45.03)EK(+45.03)LIAPVA	-	M	ATLKEKLIAPVA	E	Acetylation (Protein N-term); acetyl-d3 (K); acetyl-d3 (K)	P07195	1384.84	12
921	A(+42.01)TLK(+45.03)EK(+45.03)LIAPVAEE(+43.04)(+43.04)	-	M	ATLKEKLIAPVAEE	E	Acetylation (Protein N-term); acetyl-d3 (K); acetyl-d3 (K); ethanolamine (C-term); ethanolamine (DE)	P07195	1729.01	14
922	A(+42.01)TLLSHPQQ	-	M	ATLLSHPQQ	R	Acetylation (Protein N-term)	Q70J99	1035.53	9
923	A(+42.01)TNFLAHE(+43.04)	-	M	ATNFLAHE	K	Acetylation (Protein N-term); ethanolamine (DE)	P29692	986.482	8
924	A(+42.01)TNFLAHE(+43.04)K(+45.03)	-	M	ATNFLAHEK	I	Acetylation (Protein N-term); ethanolamine (DE); acetyl-d3 (K)	P29692	1159.61	9
925	A(+42.01)TNFLAHE(+43.04)K(+45.03)IWFD(+43.04)K(+45.03)	-	M	ATNFLAHEKIWFDK	F	Acetylation (Protein N-term); ethanolamine (DE); acetyl-d3 (K); ethanolamine (DE); acetyl-d3 (K)	P29692	1937.03	14
926	A(+42.01)TPGPVIPE(+43.04)VPFE(+43.04)PSK(+45.03)PPVIE(+43.04)GLSPTVY	-	M	ATPGPVIPEVPFEPSKPPVIEGLSPTVY	R	Acetylation (Protein N-term); ethanolamine (DE); ethanolamine (DE); acetyl-d3 (K); ethanolamine (DE)	Q9BW72	3132.72	28
927	A(+42.01)TPSK(+45.03)K(+45.03)TSTPSPQPSK(+45.03)	-	M	ATPSKKTSTPSPQPSK	R	Acetylation (Protein N-term); acetyl-d3 (K); acetyl-d3 (K); acetyl-d3 (K)	Q8IY18	1817.97	16
928	A(+42.01)TQAHSLSYAGC(+57.02)NFL	-	M	ATQAHSLSYAGCNFL	R	Acetylation (Protein N-term); Carbamidomethylation	Q9Y2P8	1680.76	15
929	A(+42.01)TQVE(+43.04)PLLPGGATL	-	M	ATQVEPLLPGGATL	L	Acetylation (Protein N-term); ethanolamine (DE)	Q6PKG0	1450.8	14
930	A(+42.01)TQVE(+43.04)PLLPGGATLLQAE(+43.04)E(+43.04)HGGLV	-	M	ATQVEPLLPGGATLLQAEEHGGLV	R	Acetylation (Protein N-term); ethanolamine (DE); ethanolamine (DE); ethanolamine (DE)	Q6PKG0	2570.41	24
931	A(+42.01)TQVE(+43.04)PLLPGGATLLQAE(+43.04)EHGGLV	-	M	ATQVEPLLPGGATLLQAEEHGGLV	R	Acetylation (Protein N-term); ethanolamine (DE); ethanolamine (DE)	Q6PKG0	2527.36	24
932	A(+42.01)TQVE(+43.04)PLLPGGATLLQAE(+43.04)EHGGLV(+43.04)	-	M	ATQVEPLLPGGATLLQAEEHGGLV	R	Acetylation (Protein N-term); ethanolamine (DE); ethanolamine (DE); ethanolamine (C-term)	Q6PKG0	2570.41	24
933	A(+42.01)TSATSPHAPGFPAE(+43.04)G	-	M	ATSATSPHAPGFPAEG	R	Acetylation (Protein N-term); ethanolamine (DE)	Q9NUP7	1581.74	16
934	A(+42.01)TSLGSNTYN	-	M	ATSLGSNTYN	R	Acetylation (Protein N-term)	Q9NW64	1068.47	10
935	A(+42.01)TSPQK(+45.03)SPSVPK(+45.03)SPTPK(+45.03)SPPS	-	M	ATSPQKSPSVPKSPTPKSPPS	R	Acetylation (Protein N-term); acetyl-d3 (K); acetyl-d3 (K); acetyl-d3 (K)	Q9NVD7	2281.22	21
936	A(+42.01)TTATM(+15.99)ATSGSA	-	M	ATTATMATSGSA	R	Acetylation (Protein N-term); Oxidation (M)	P38919	1126.48	12
937	A(+42.01)TTATMATSGSA	-	M	ATTATMATSGSA	R	Acetylation (Protein N-term)	P38919	1110.49	12
938	A(+42.01)TVE(+43.04)PE(+43.04)TTPTPNPPTTEE(+43.04)(+43.04)	-	M	ATVEPETTPTPNPPTTEE	E	Acetylation (Protein N-term); ethanolamine (DE); ethanolamine (DE); ethanolamine (C-term); ethanolamine (DE)	P06730	2124.06	18
939	A(+42.01)TVQQLE(+43.04)G	-	M	ATVQQLEG	R	Acetylation (Protein N-term); ethanolamine (DE)	Q01469	929.482	8
940	A(+42.01)TVQQLE(+43.04)GRW	-	M	ATVQQLEGRW	R	Acetylation (Protein N-term); ethanolamine (DE)	Q01469	1271.66	10
941	A(+42.01)TVQQLEG(+43.04)	-	M	ATVQQLEG	R	Acetylation (Protein N-term); ethanolamine (C-term)	Q01469	929.482	8
942	A(+42.01)TVQQLEGRW	-	M	ATVQQLEGRW	R	Acetylation (Protein N-term)	Q01469	1228.62	10
943	A(+42.01)TVQQLEGRW(+43.04)	-	M	ATVQQLEGRW	R	Acetylation (Protein N-term); ethanolamine (C-term)	Q01469	1271.66	10
944	A(+42.01)TVTATTK(+45.03)VPE(+43.04)I	-	M	ATVTATTKVPEI	R	Acetylation (Protein N-term); acetyl-d3 (K); ethanolamine (DE)	Q9Y230	1359.77	12
945	A(+42.01)TVTATTK(+45.03)VPE(+43.04)IRD(+43.04)VT	-	M	ATVTATTKVPEIRDVT	R	Acetylation (Protein N-term); acetyl-d3 (K); ethanolamine (DE); ethanolamine (DE)	Q9Y230	1874.06	16
946	A(+42.01)TVTATTK(+45.03)VPE(+43.04)IRDVT	-	M	ATVTATTKVPEIRDVT	R	Acetylation (Protein N-term); acetyl-d3 (K); ethanolamine (DE)	Q9Y230	1831.01	16
947	A(+42.01)TVTATTK(+45.03)VPEI	-	M	ATVTATTKVPEI	R	Acetylation (Protein N-term); acetyl-d3 (K)	Q9Y230	1316.73	12
948	A(+42.01)TVTATTK(+45.03)VPEI(+43.04)	-	M	ATVTATTKVPEI	R	Acetylation (Protein N-term); acetyl-d3 (K); ethanolamine (C-term)	Q9Y230	1359.77	12
949	A(+42.01)TVTATTK(+45.03)VPEIRD(+43.04)VT	-	M	ATVTATTKVPEIRDVT	R	Acetylation (Protein N-term); acetyl-d3 (K); ethanolamine (DE)	Q9Y230	1831.01	16
950	A(+42.01)TVTATTK(+45.03)VPEIRDVT(+43.04)	-	M	ATVTATTKVPEIRDVT	R	Acetylation (Protein N-term); acetyl-d3 (K); ethanolamine (C-term)	Q9Y230	1831.01	16
951	A(+42.01)TVVVE(+43.04)ATE(+43.04)PE(+43.04)PSGSIANPAASTSPSLSH	-	M	ATVVVEATEPEPSGSIANPAASTSPSLSH	R	Acetylation (Protein N-term); ethanolamine (DE); ethanolamine (DE); ethanolamine (DE)	P46821	2976.5	29
952	A(+42.01)TYLE(+43.04)FIQQNEE(+43.04)(+43.04)	-	M	ATYLEFIQQNEE	R	Acetylation (Protein N-term); ethanolamine (DE); ethanolamine (C-term); ethanolamine (DE)	Q15437	1654.82	12
953	A(+42.01)TYTC(+57.02)ITC(+57.02)	-	M	ATYTCITC	R	Acetylation (Protein N-term); Carbamidomethylation; Carbamidomethylation	Q969S3	1030.41	8
954	A(+42.01)VAAAAAAAGPAGAGGG	-	M	AVAAAAAAAGPAGAGGG	R	Acetylation (Protein N-term)	Q13884	1251.62	17
955	A(+42.01)VANSSPVNPVVFF	-	M	AVANSSPVNPVVFF	D	Acetylation (Protein N-term)	O43447	1488.76	14
956	A(+42.01)VASD(+43.04)FYL	-	M	AVASDFYL	R	Acetylation (Protein N-term); ethanolamine (DE)	Q96A72	969.481	8
957	A(+42.01)VAVGRPSNE(+43.04)E(+43.04)L	-	M	AVAVGRPSNEEL	R	Acetylation (Protein N-term); ethanolamine (DE); ethanolamine (DE)	Q9NVA2	1368.74	12
958	A(+42.01)VE(+43.04)E(+43.04)LQSIIK(+45.03)	-	M	AVEELQSIIK	R	Acetylation (Protein N-term); ethanolamine (DE); ethanolamine (DE); acetyl-d3 (K)	Q92990	1301.76	10
959	A(+42.01)VE(+43.04)TLSPD(+43.04)WE(+43.04)FD(+43.04)	-	M	AVETLSPDWEFD	R	Acetylation (Protein N-term); ethanolamine (DE); ethanolamine (DE); ethanolamine (DE); ethanolamine (DE)	Q2M389	1621.8	12
960	A(+42.01)VFPWHS	S，-	V，M	AVFPWHS	L，R	Acetylation (Protein N-term)	Q96RK0，Q7Z3J2	884.418	7
961	A(+42.01)VK(+45.03)VQTTK(+45.03)	-	M	AVKVQTTK	R	Acetylation (Protein N-term); acetyl-d3 (K); acetyl-d3 (K)	O75746	1005.6	8
962	A(+42.01)VNVYSTSVTSD(+43.04)NLS	-	M	AVNVYSTSVTSDNLS	R	Acetylation (Protein N-term); ethanolamine (DE)	Q15691	1640.79	15
963	A(+42.01)VNVYSTSVTSDNLS	-	M	AVNVYSTSVTSDNLS	R	Acetylation (Protein N-term)	Q15691	1597.75	15
964	A(+42.01)VPAAAM(+15.99)GPSAL	-	M	AVPAAAMGPSAL	G	Acetylation (Protein N-term); Oxidation (M)	Q96J01	1112.55	12
965	A(+42.01)VPAAAM(+15.99)GPSALGQSGPGSM(+15.99)APWC(+57.02)SVSSGPS	-	M	AVPAAAMGPSALGQSGPGSMAPWCSVSSGPS	R	Acetylation (Protein N-term); Oxidation (M); Oxidation (M); Carbamidomethylation	Q96J01	2945.3	31
966	A(+42.01)VPAAAMGPSAL	-	M	AVPAAAMGPSAL	G	Acetylation (Protein N-term)	Q96J01	1096.56	12
967	A(+42.01)VPPTYAD(+43.04)L	-	M	AVPPTYADL	G	Acetylation (Protein N-term); ethanolamine (DE)	P21796	1030.53	9
968	A(+42.01)VPPTYAD(+43.04)LGK(+45.03)SA	-	M	AVPPTYADLGKSA	R	Acetylation (Protein N-term); ethanolamine (DE); acetyl-d3 (K)	P21796	1418.75	13
969	A(+42.01)VPPTYADLGK(+45.03)SA	-	M	AVPPTYADLGKSA	R	Acetylation (Protein N-term); acetyl-d3 (K)	P21796	1375.71	13
970	A(+42.01)VQISK(+45.03)K(+45.03)	-	M	AVQISKK	R	Acetylation (Protein N-term); acetyl-d3 (K); acetyl-d3 (K)	P23396	904.55	7
971	A(+42.01)VQVVQAVQAVHL	-	M	AVQVVQAVQAVHL	E	Acetylation (Protein N-term)	P46736	1402.79	13
972	A(+42.01)VQVVQAVQAVHLE(+43.04)SD(+43.04)A	-	M	AVQVVQAVQAVHLESDA	F	Acetylation (Protein N-term); ethanolamine (DE); ethanolamine (DE)	P46736	1891.02	17
973	A(+42.01)VQVVQAVQAVHLE(+43.04)SDA(+43.04)	-	M	AVQVVQAVQAVHLESDA	F	Acetylation (Protein N-term); ethanolamine (DE); ethanolamine (C-term)	P46736	1891.02	17
974	A(+42.01)VSTGVK(+45.03)VP	-	M	AVSTGVKVP	R	Acetylation (Protein N-term); acetyl-d3 (K)	Q15819	943.542	9
975	A(+42.01)VSTGVK(+45.03)VPRNF	-	M	AVSTGVKVPRNF	R	Acetylation (Protein N-term); acetyl-d3 (K)	Q15819	1360.75	12
976	A(+42.01)VTLD(+43.04)K(+45.03)D(+43.04)AYY	-	M	AVTLDKDAYY	R	Acetylation (Protein N-term); ethanolamine (DE); acetyl-d3 (K); ethanolamine (DE)	Q9Y5B9	1330.68	10
977	A(+42.01)VTLD(+43.04)K(+45.03)D(+43.04)AYYR	-	M	AVTLDKDAYYR	R	Acetylation (Protein N-term); ethanolamine (DE); acetyl-d3 (K); ethanolamine (DE)	Q9Y5B9	1486.79	11
978	A(+42.01)VTLD(+43.04)K(+45.03)DAYY	-	M	AVTLDKDAYY	R	Acetylation (Protein N-term); ethanolamine (DE); acetyl-d3 (K)	Q9Y5B9	1287.64	10
979	A(+42.01)VTLD(+43.04)K(+45.03)DAYYR	-	M	AVTLDKDAYYR	R	Acetylation (Protein N-term); ethanolamine (DE); acetyl-d3 (K)	Q9Y5B9	1443.74	11
980	A(+42.01)VTLDK(+45.03)D(+43.04)AYYR	-	M	AVTLDKDAYYR	R	Acetylation (Protein N-term); acetyl-d3 (K); ethanolamine (DE)	Q9Y5B9	1443.74	11
981	A(+42.01)WK(+45.03)SGGASH	-	M	AWKSGGASH	S	Acetylation (Protein N-term); acetyl-d3 (K)	P22061	986.465	9
982	A(+42.01)WK(+45.03)SGGASHS	-	M	AWKSGGASHS	E	Acetylation (Protein N-term); acetyl-d3 (K)	P22061	1073.5	10
983	A(+42.01)WK(+45.03)SGGASHSE(+43.04)LIHNL	-	M	AWKSGGASHSELIHNL	R	Acetylation (Protein N-term); acetyl-d3 (K); ethanolamine (DE)	P22061	1835.94	16
984	A(+42.01)WK(+45.03)SGGASHSELIHNL	-	M	AWKSGGASHSELIHNL	R	Acetylation (Protein N-term); acetyl-d3 (K)	P22061	1792.89	16
985	A(+42.01)YHSFLVE(+43.04)PIS	-	M	AYHSFLVEPIS	C	Acetylation (Protein N-term); ethanolamine (DE)	O15143	1346.69	11
986	A(+42.01)YHSFLVE(+43.04)PISC(+57.02)	-	M	AYHSFLVEPISC	H	Acetylation (Protein N-term); ethanolamine (DE); Carbamidomethylation	O15143	1506.72	12
987	A(+42.01)YHSFLVE(+43.04)PISC(+57.02)HAWNK(+45.03)D(+43.04)	-	M	AYHSFLVEPISCHAWNKD	R	Acetylation (Protein N-term); ethanolamine (DE); Carbamidomethylation; acetyl-d3 (K); ethanolamine (DE)	O15143	2346.13	18
988	A(+42.01)YHSGYGAH	-	M	AYHSGYGAH	G	Acetylation (Protein N-term)	O95070	1003.41	9
989	A(+42.01)YHSGYGAHGSK(+45.03)H	-	M	AYHSGYGAHGSKH	R	Acetylation (Protein N-term); acetyl-d3 (K)	O95070	1457.65	13
990	A(+42.01)YPGHPGAGG	-	M	AYPGHPGAGG	G	Acetylation (Protein N-term)	P30626	924.409	10
991	A(+42.01)YPGHPGAGGGYYPGGY	-	M	AYPGHPGAGGGYYPGGY	G	Acetylation (Protein N-term)	P30626	1681.72	17
992	A(+42.01)YPGHPGAGGGYYPGGYG	-	M	AYPGHPGAGGGYYPGGYG	G	Acetylation (Protein N-term)	P30626	1738.74	18
993	A(+42.01)YPGHPGAGGGYYPGGYGGAPGGPAFPGQTQ	-	M	AYPGHPGAGGGYYPGGYGGAPGGPAFPGQTQ	D	Acetylation (Protein N-term)	P30626	2904.29	31
994	A(+42.01)YPGHPGAGGGYYPGGYGGAPGGPAFPGQTQD(+43.04)	-	M	AYPGHPGAGGGYYPGGYGGAPGGPAFPGQTQD	P	Acetylation (Protein N-term); ethanolamine (DE)	P30626	3062.36	32
995	A(+42.01)YPGHPGAGGGYYPGGYGGAPGGPAFPGQTQD(+43.04)PLYGYFA	-	M	AYPGHPGAGGGYYPGGYGGAPGGPAFPGQTQDPLYGYFA	A	Acetylation (Protein N-term); ethanolamine (DE)	P30626	3873.75	39
996	A(+45.03)AAAAAAAAAGAAGG	-	M	AAAAAAAAAAGAAGG	R	acetyl-d3 (protein N-term)	Q86U42	1086.55	15
997	A(+45.03)AAAVGAGHGAGGPGAASSSGGA	-	M	AAAAVGAGHGAGGPGAASSSGGA	R	acetyl-d3 (protein N-term)	Q96K37	1752.82	23
998	A(+45.03)AAGAAATHLE(+43.04)VA	-	M	AAAGAAATHLEVA	R	acetyl-d3 (protein N-term); ethanolamine (DE)	Q96S52	1239.66	13
999	A(+45.03)AD(+43.04)K(+45.03)GPAAGPRS	-	M	AADKGPAAGPRS	R	acetyl-d3 (protein N-term); ethanolamine (DE); acetyl-d3 (K)	Q8TDD1	1229.66	12
1000	A(+45.03)AD(+43.04)TQVSE(+43.04)TLK(+45.03)	-	M	AADTQVSETLK	R	acetyl-d3 (protein N-term); ethanolamine (DE); ethanolamine (DE); acetyl-d3 (K)	Q92616	1337.73	11
1001	A(+45.03)AE(+43.04)D(+43.04)VVATGAD(+43.04)PSD(+43.04)L	-	M	AAEDVVATGADPSDL	E	acetyl-d3 (protein N-term); ethanolamine (DE); ethanolamine (DE); ethanolamine (DE); ethanolamine (DE)	O00264	1646.86	15
1002	A(+45.03)AE(+43.04)D(+43.04)VVATGAD(+43.04)PSDL(+43.04)	-	M	AAEDVVATGADPSDL	E	acetyl-d3 (protein N-term); ethanolamine (DE); ethanolamine (DE); ethanolamine (DE); ethanolamine (C-term)	O00264	1646.86	15
1003	A(+45.03)AE(+43.04)K(+45.03)QVPGGGGGGGSGGGGGSGGGGSGGG	-	M	AAEKQVPGGGGGGGSGGGGGSGGGGSGGG	R	acetyl-d3 (protein N-term); ethanolamine (DE); acetyl-d3 (K)	Q9UHB9	2219.01	29
1004	A(+45.03)AGAGTAGPASGPGVV	-	M	AAGAGTAGPASGPGVV	R	acetyl-d3 (protein N-term)	Q15554	1283.65	16
1005	A(+45.03)ATLILE(+43.04)PAG	R，-	M，M	AATLILEPAG	R，R	acetyl-d3 (protein N-term); ethanolamine (DE)	P49753，Q86TX2	1042.61	10
1006	A(+45.03)FK(+45.03)D(+43.04)TGK(+45.03)TPVEPE(+43.04)VAIH	-	M	AFKDTGKTPVEPEVAIH	R	acetyl-d3 (protein N-term); acetyl-d3 (K); ethanolamine (DE); acetyl-d3 (K); ethanolamine (DE)	P60866	2059.13	17
1007	A(+45.03)GE(+43.04)K(+45.03)VE(+43.04)K(+45.03)PD(+43.04)TK(+45.03)	-	M	AGEKVEKPDTK	E	acetyl-d3 (protein N-term); ethanolamine (DE); acetyl-d3 (K); ethanolamine (DE); acetyl-d3 (K); more	Q02878	1509.88	11
1008	A(+45.03)GE(+43.04)K(+45.03)VE(+43.04)K(+45.03)PD(+43.04)TK(+45.03)E(+43.04)K(+45.03)K(+45.03)P	-	M	AGEKVEKPDTKEKKP	E	acetyl-d3 (protein N-term); ethanolamine (DE); acetyl-d3 (K); ethanolamine (DE); acetyl-d3 (K); more	Q02878	2125.27	15
1009	A(+45.03)GE(+43.04)K(+45.03)VE(+43.04)K(+45.03)PDTK(+45.03)	-	M	AGEKVEKPDTK	E	acetyl-d3 (protein N-term); ethanolamine (DE); acetyl-d3 (K); ethanolamine (DE); acetyl-d3 (K); more	Q02878	1466.84	11
1010	A(+45.03)GE(+43.04)K(+45.03)VEK(+45.03)PD(+43.04)TK(+45.03)	-	M	AGEKVEKPDTK	E	acetyl-d3 (protein N-term); ethanolamine (DE); acetyl-d3 (K); acetyl-d3 (K); ethanolamine (DE); more	Q02878	1466.84	11
1011	A(+45.03)GE(+43.04)K(+45.03)VEK(+45.03)PD(+43.04)TK(+45.03)E(+43.04)K(+45.03)K(+45.03)PE(+43.04)AK(+45.03)K(+45.03)VD(+43.04)AGGK(+45.03)VK(+45.03)K(+45.03)GNLK(+45.03)AK(+45.03)K(+45.03)PK(+45.03)K(+45.03)GK(+45.03)PHC(+57.02)S	-	M	AGEKVEKPDTKEKKPEAKKVDAGGKVKKGNLKAKKPKKGKPHCS	R	acetyl-d3 (protein N-term); ethanolamine (DE); acetyl-d3 (K); acetyl-d3 (K); ethanolamine (DE); more	Q02878	5761.43	44
1012	A(+45.03)GE(+43.04)LAD(+43.04)K(+45.03)K(+45.03)D(+43.04)	-	M	AGELADKKD	R	acetyl-d3 (protein N-term); ethanolamine (DE); ethanolamine (DE); acetyl-d3 (K); acetyl-d3 (K); more	Q9BUQ8	1209.69	9
1013	A(+45.03)GELAD(+43.04)K(+45.03)K(+45.03)D(+43.04)	-	M	AGELADKKD	R	acetyl-d3 (protein N-term); ethanolamine (DE); acetyl-d3 (K); acetyl-d3 (K); ethanolamine (DE)	Q9BUQ8	1166.65	9
1014	A(+45.03)GGE(+43.04)AGVTLGQPHLS	-，-	M，M	AGGEAGVTLGQPHLS	R，R	acetyl-d3 (protein N-term); ethanolamine (DE)	P41091，Q2VIR3	1480.77	15
1015	A(+45.03)GGGAGD(+43.04)PGLGAAAAPAPE(+43.04)T	-	M	AGGGAGDPGLGAAAAPAPET	R	acetyl-d3 (protein N-term); ethanolamine (DE); ethanolamine (DE)	Q13637	1737.87	20
1016	A(+45.03)GGK(+45.03)AGK(+45.03)D	-，-	M，M	AGGKAGKD	S，S	acetyl-d3 (protein N-term); acetyl-d3 (K); acetyl-d3 (K)	Q71UI9，P0C0S5	837.454	8
1017	A(+45.03)GGK(+45.03)AGK(+45.03)D(+43.04)	-，-	M，M	AGGKAGKD	S，S	acetyl-d3 (protein N-term); acetyl-d3 (K); acetyl-d3 (K); ethanolamine (DE)	Q71UI9，P0C0S5	880.496	8
1018	A(+45.03)GGK(+45.03)AGK(+45.03)D(+43.04)S	-，-	M，M	AGGKAGKDS	G，G	acetyl-d3 (protein N-term); acetyl-d3 (K); acetyl-d3 (K); ethanolamine (DE)	Q71UI9，P0C0S5	967.528	9
1019	A(+45.03)GGK(+45.03)AGK(+45.03)D(+43.04)SGK(+45.03)	-，-	M，M	AGGKAGKDSGK	A，A	acetyl-d3 (protein N-term); acetyl-d3 (K); acetyl-d3 (K); ethanolamine (DE); acetyl-d3 (K)	Q71UI9，P0C0S5	1197.67	11
1020	A(+45.03)GGK(+45.03)AGK(+45.03)D(+43.04)SGK(+45.03)A	-，-	M，M	AGGKAGKDSGKA	K，K	acetyl-d3 (protein N-term); acetyl-d3 (K); acetyl-d3 (K); ethanolamine (DE); acetyl-d3 (K)	Q71UI9，P0C0S5	1268.71	12
1021	A(+45.03)GGK(+45.03)AGK(+45.03)D(+43.04)SGK(+45.03)AK(+45.03)	-，-	M，M	AGGKAGKDSGKAK	A，T	acetyl-d3 (protein N-term); acetyl-d3 (K); acetyl-d3 (K); ethanolamine (DE); acetyl-d3 (K); more	Q71UI9，P0C0S5	1441.84	13
1022	A(+45.03)GGK(+45.03)AGK(+45.03)D(+43.04)SGK(+45.03)AK(+45.03)AK(+45.03)	-	M	AGGKAGKDSGKAKAK	A	acetyl-d3 (protein N-term); acetyl-d3 (K); acetyl-d3 (K); ethanolamine (DE); acetyl-d3 (K); more	Q71UI9	1686	15
1023	A(+45.03)GGK(+45.03)AGK(+45.03)D(+43.04)SGK(+45.03)AK(+45.03)AK(+45.03)AVS	-	M	AGGKAGKDSGKAKAKAVS	R	acetyl-d3 (protein N-term); acetyl-d3 (K); acetyl-d3 (K); ethanolamine (DE); acetyl-d3 (K); more	Q71UI9	1943.13	18
1024	A(+45.03)GGK(+45.03)AGK(+45.03)D(+43.04)SGK(+45.03)AK(+45.03)T	-	M	AGGKAGKDSGKAKT	K	acetyl-d3 (protein N-term); acetyl-d3 (K); acetyl-d3 (K); ethanolamine (DE); acetyl-d3 (K); more	P0C0S5	1542.88	14
1025	A(+45.03)GGK(+45.03)AGK(+45.03)D(+43.04)SGK(+45.03)AK(+45.03)TK(+45.03)	-	M	AGGKAGKDSGKAKTK	A	acetyl-d3 (protein N-term); acetyl-d3 (K); acetyl-d3 (K); ethanolamine (DE); acetyl-d3 (K); more	P0C0S5	1716.01	15
1026	A(+45.03)GGK(+45.03)AGK(+45.03)D(+43.04)SGK(+45.03)AK(+45.03)TK(+45.03)AV	-	M	AGGKAGKDSGKAKTKAV	S	acetyl-d3 (protein N-term); acetyl-d3 (K); acetyl-d3 (K); ethanolamine (DE); acetyl-d3 (K); more	P0C0S5	1886.11	17
1027	A(+45.03)GGK(+45.03)AGK(+45.03)D(+43.04)SGK(+45.03)AK(+45.03)TK(+45.03)AVS	-	M	AGGKAGKDSGKAKTKAVS	R	acetyl-d3 (protein N-term); acetyl-d3 (K); acetyl-d3 (K); ethanolamine (DE); acetyl-d3 (K); more	P0C0S5	1973.15	18
1028	A(+45.03)GGK(+45.03)AGK(+45.03)DSGK(+45.03)	-，-	M，M	AGGKAGKDSGK	A，A	acetyl-d3 (protein N-term); acetyl-d3 (K); acetyl-d3 (K); acetyl-d3 (K)	Q71UI9，P0C0S5	1154.63	11
1029	A(+45.03)GGK(+45.03)AGK(+45.03)DSGK(+45.03)AK(+45.03)	-，-	M，M	AGGKAGKDSGKAK	A，T	acetyl-d3 (protein N-term); acetyl-d3 (K); acetyl-d3 (K); acetyl-d3 (K); acetyl-d3 (K)	Q71UI9，P0C0S5	1398.79	13
1030	A(+45.03)GGK(+45.03)AGK(+45.03)DSGK(+45.03)AK(+45.03)AK(+45.03)AVS	-	M	AGGKAGKDSGKAKAKAVS	R	acetyl-d3 (protein N-term); acetyl-d3 (K); acetyl-d3 (K); acetyl-d3 (K); acetyl-d3 (K); more	Q71UI9	1900.09	18
1031	A(+45.03)GGK(+45.03)AGK(+45.03)DSGK(+45.03)AK(+45.03)TK(+45.03)	-	M	AGGKAGKDSGKAKTK	A	acetyl-d3 (protein N-term); acetyl-d3 (K); acetyl-d3 (K); acetyl-d3 (K); acetyl-d3 (K); more	P0C0S5	1672.97	15
1032	A(+45.03)GGK(+45.03)AGK(+45.03)DSGK(+45.03)AK(+45.03)TK(+45.03)AVS	-	M	AGGKAGKDSGKAKTKAVS	R	acetyl-d3 (protein N-term); acetyl-d3 (K); acetyl-d3 (K); acetyl-d3 (K); acetyl-d3 (K); more	P0C0S5	1930.1	18
1033	A(+45.03)IK(+45.03)FLE(+43.04)VIK(+45.03)PF	-	M	AIKFLEVIKPF	C	acetyl-d3 (protein N-term); acetyl-d3 (K); ethanolamine (DE); acetyl-d3 (K)	P61619	1481.92	11
1034	A(+45.03)IK(+45.03)FLE(+43.04)VIK(+45.03)PFC(+57.02)VILPE(+43.04)IQK(+45.03)PE(+43.04)	-	M	AIKFLEVIKPFCVILPEIQKPE	R	acetyl-d3 (protein N-term); acetyl-d3 (K); ethanolamine (DE); acetyl-d3 (K); Carbamidomethylation; more	P61619	2919.73	22
1035	A(+45.03)K(+45.03)AGD(+43.04)K(+45.03)SSSSGK(+45.03)K(+45.03)SLK(+45.03)	-	M	AKAGDKSSSSGKKSLK	R	acetyl-d3 (protein N-term); acetyl-d3 (K); ethanolamine (DE); acetyl-d3 (K); acetyl-d3 (K); more	Q9H9Y2	1891.09	16
1036	A(+45.03)K(+45.03)AK(+45.03)K(+45.03)VGA	-	M	AKAKKVGA	R	acetyl-d3 (protein N-term); acetyl-d3 (K); acetyl-d3 (K); acetyl-d3 (K)	P78316	951.614	8
1037	A(+45.03)K(+45.03)AK(+45.03)K(+45.03)VGAR	-	M	AKAKKVGAR	R	acetyl-d3 (protein N-term); acetyl-d3 (K); acetyl-d3 (K); acetyl-d3 (K)	P78316	1107.72	9
1038	A(+45.03)K(+45.03)GD(+43.04)PK(+45.03)K(+45.03)PK(+45.03)	-	M	AKGDPKKPK	G	acetyl-d3 (protein N-term); acetyl-d3 (K); ethanolamine (DE); acetyl-d3 (K); acetyl-d3 (K); more	O15347	1235.77	9
1039	A(+45.03)K(+45.03)GD(+43.04)PK(+45.03)K(+45.03)PK(+45.03)GK(+45.03)	-	M	AKGDPKKPKGK	M	acetyl-d3 (protein N-term); acetyl-d3 (K); ethanolamine (DE); acetyl-d3 (K); acetyl-d3 (K); more	O15347	1465.92	11
1040	A(+45.03)K(+45.03)GD(+43.04)PK(+45.03)K(+45.03)PK(+45.03)GK(+45.03)M	-	M	AKGDPKKPKGKM	S	acetyl-d3 (protein N-term); acetyl-d3 (K); ethanolamine (DE); acetyl-d3 (K); acetyl-d3 (K); more	O15347	1596.96	12
1041	A(+45.03)K(+45.03)GD(+43.04)PK(+45.03)K(+45.03)PK(+45.03)GK(+45.03)M(+15.99)	-	M	AKGDPKKPKGKM	S	acetyl-d3 (protein N-term); acetyl-d3 (K); ethanolamine (DE); acetyl-d3 (K); acetyl-d3 (K); more	O15347	1612.95	12
1042	A(+45.03)K(+45.03)GD(+43.04)PK(+45.03)K(+45.03)PK(+45.03)GK(+45.03)M(+15.99)S	-	M	AKGDPKKPKGKMS	A	acetyl-d3 (protein N-term); acetyl-d3 (K); ethanolamine (DE); acetyl-d3 (K); acetyl-d3 (K); more	O15347	1699.98	13
1043	A(+45.03)K(+45.03)GD(+43.04)PK(+45.03)K(+45.03)PK(+45.03)GK(+45.03)M(+15.99)SAY	-	M	AKGDPKKPKGKMSAY	A	acetyl-d3 (protein N-term); acetyl-d3 (K); ethanolamine (DE); acetyl-d3 (K); acetyl-d3 (K); more	O15347	1934.08	15
1044	A(+45.03)K(+45.03)GD(+43.04)PK(+45.03)K(+45.03)PK(+45.03)GK(+45.03)M(+15.99)SAYAFFVQTC(+57.02)	-	M	AKGDPKKPKGKMSAYAFFVQTC	R	acetyl-d3 (protein N-term); acetyl-d3 (K); ethanolamine (DE); acetyl-d3 (K); acetyl-d3 (K); more	O15347	2787.46	22
1045	A(+45.03)K(+45.03)GD(+43.04)PK(+45.03)K(+45.03)PK(+45.03)GK(+45.03)MS	-	M	AKGDPKKPKGKMS	A	acetyl-d3 (protein N-term); acetyl-d3 (K); ethanolamine (DE); acetyl-d3 (K); acetyl-d3 (K); more	O15347	1683.99	13
1046	A(+45.03)K(+45.03)GD(+43.04)PK(+45.03)K(+45.03)PK(+45.03)GK(+45.03)MSAY	-	M	AKGDPKKPKGKMSAY	A	acetyl-d3 (protein N-term); acetyl-d3 (K); ethanolamine (DE); acetyl-d3 (K); acetyl-d3 (K); more	O15347	1918.09	15
1047	A(+45.03)K(+45.03)IK(+45.03)ARD(+43.04)L	-	M	AKIKARDL	R	acetyl-d3 (protein N-term); acetyl-d3 (K); acetyl-d3 (K); ethanolamine (DE)	P42766	1091.7	8
1048	A(+45.03)K(+45.03)IK(+45.03)ARDL	-	M	AKIKARDL	R	acetyl-d3 (protein N-term); acetyl-d3 (K); acetyl-d3 (K)	P42766	1048.66	8
1049	A(+45.03)K(+45.03)IK(+45.03)ARDL(+43.04)	-	M	AKIKARDL	R	acetyl-d3 (protein N-term); acetyl-d3 (K); acetyl-d3 (K); ethanolamine (C-term)	P42766	1091.7	8
1050	A(+45.03)K(+45.03)SK(+45.03)NHTTHNQ	-	M	AKSKNHTTHNQ	S	acetyl-d3 (protein N-term); acetyl-d3 (K); acetyl-d3 (K)	P47914	1399.72	11
1051	A(+45.03)K(+45.03)SK(+45.03)NHTTHNQS	-	M	AKSKNHTTHNQS	R	acetyl-d3 (protein N-term); acetyl-d3 (K); acetyl-d3 (K)	P47914	1486.75	12
1052	A(+45.03)LSAE(+43.04)TE(+43.04)SHIY	-	M	ALSAETESHIY	R	acetyl-d3 (protein N-term); ethanolamine (DE); ethanolamine (DE)	O14569	1350.69	11
1053	A(+45.03)LSAETE(+43.04)SHIY	-	M	ALSAETESHIY	R	acetyl-d3 (protein N-term); ethanolamine (DE)	O14569	1307.64	11
1054	A(+45.03)PAAASPPE(+43.04)VI	-	M	APAAASPPEVI	R	acetyl-d3 (protein N-term); ethanolamine (DE)	O60683	1109.62	11
1055	A(+45.03)PAK(+45.03)K(+45.03)GGE(+43.04)K(+45.03)K(+45.03)K(+45.03)G	-	M	APAKKGGEKKKG	R	acetyl-d3 (protein N-term); acetyl-d3 (K); acetyl-d3 (K); ethanolamine (DE); acetyl-d3 (K); more	P62899	1510.94	12
1056	A(+45.03)PAK(+45.03)K(+45.03)GGEK(+45.03)K(+45.03)K(+45.03)G	-	M	APAKKGGEKKKG	R	acetyl-d3 (protein N-term); acetyl-d3 (K); acetyl-d3 (K); acetyl-d3 (K); acetyl-d3 (K); more	P62899	1467.9	12
1057	A(+45.03)PAM(+15.99)QPAE(+43.04)IQFAQ	-	M	APAMQPAEIQFAQ	R	acetyl-d3 (protein N-term); Oxidation (M); ethanolamine (DE)	Q14684	1504.74	13
1058	A(+45.03)PD(+43.04)PVAAE(+43.04)TAAQGPTP	-	M	APDPVAAETAAQGPTP	R	acetyl-d3 (protein N-term); ethanolamine (DE); ethanolamine (DE)	O60427	1622.83	16
1059	A(+45.03)PE(+43.04)VLPK(+45.03)PRM	-	M	APEVLPKPRM	R	acetyl-d3 (protein N-term); ethanolamine (DE); acetyl-d3 (K)	P09669	1269.74	10
1060	A(+45.03)PE(+43.04)VLPK(+45.03)PRM(+15.99)	-	M	APEVLPKPRM	R	acetyl-d3 (protein N-term); ethanolamine (DE); acetyl-d3 (K); Oxidation (M)	P09669	1285.73	10
1061	A(+45.03)PEVLPK(+45.03)PRM	-	M	APEVLPKPRM	R	acetyl-d3 (protein N-term); acetyl-d3 (K)	P09669	1226.7	10
1062	A(+45.03)PEVLPK(+45.03)PRM(+15.99)	-	M	APEVLPKPRM	R	acetyl-d3 (protein N-term); acetyl-d3 (K); Oxidation (M)	P09669	1242.69	10
1063	A(+45.03)PK(+45.03)AK(+45.03)K(+45.03)E(+43.04)APAPPK(+45.03)A	-	M	APKAKKEAPAPPKA	E	acetyl-d3 (protein N-term); acetyl-d3 (K); acetyl-d3 (K); acetyl-d3 (K); ethanolamine (DE); more	P62750	1671.02	14
1064	A(+45.03)PK(+45.03)AK(+45.03)K(+45.03)E(+43.04)APAPPK(+45.03)AE(+43.04)	-	M	APKAKKEAPAPPKAE	A	acetyl-d3 (protein N-term); acetyl-d3 (K); acetyl-d3 (K); acetyl-d3 (K); ethanolamine (DE); more	P62750	1843.1	15
1065	A(+45.03)PK(+45.03)AK(+45.03)K(+45.03)E(+43.04)APAPPK(+45.03)AE(+43.04)AK(+45.03)	-	M	APKAKKEAPAPPKAEAK	A	acetyl-d3 (protein N-term); acetyl-d3 (K); acetyl-d3 (K); acetyl-d3 (K); ethanolamine (DE); more	P62750	2087.26	17
1066	A(+45.03)PK(+45.03)AK(+45.03)K(+45.03)E(+43.04)APAPPK(+45.03)AE(+43.04)AK(+45.03)AK(+45.03)	-	M	APKAKKEAPAPPKAEAKAK	A	acetyl-d3 (protein N-term); acetyl-d3 (K); acetyl-d3 (K); acetyl-d3 (K); ethanolamine (DE); more	P62750	2331.43	19
1067	A(+45.03)PK(+45.03)FPD(+43.04)SVE(+43.04)EL(+43.04)	-	M	APKFPDSVEEL	R	acetyl-d3 (protein N-term); acetyl-d3 (K); ethanolamine (DE); ethanolamine (DE); ethanolamine (C-term)	Q15785	1449.8	11
1068	A(+45.03)PLD(+43.04)LD(+43.04)K(+45.03)YV	-	M	APLDLDKYV	E	acetyl-d3 (protein N-term); ethanolamine (DE); ethanolamine (DE); acetyl-d3 (K)	O00743	1208.69	9
1069	A(+45.03)PLD(+43.04)LD(+43.04)K(+45.03)YVE(+43.04)IA	-	M	APLDLDKYVEIA	R	acetyl-d3 (protein N-term); ethanolamine (DE); ethanolamine (DE); acetyl-d3 (K); ethanolamine (DE)	O00743	1564.9	12
1070	A(+45.03)PQK(+45.03)HGGGGGGGSGPSAGSGGGGFGGSA	-	M	APQKHGGGGGGGSGPSAGSGGGGFGGSA	A	acetyl-d3 (protein N-term); acetyl-d3 (K)	Q15022	2259.02	28
1071	A(+45.03)PSTPLLTV	-	M	APSTPLLTV	R	acetyl-d3 (protein N-term)	Q9BY44	942.547	9
1072	A(+45.03)PSVPAAE(+43.04)PE(+43.04)YPK(+45.03)GI	-	M	APSVPAAEPEYPKGI	R	acetyl-d3 (protein N-term); ethanolamine (DE); ethanolamine (DE); acetyl-d3 (K)	P54819	1700.93	15
1073	A(+45.03)PSVPAAE(+43.04)PEY(+155.14)PK(+45.03)GI	-	M	APSVPAAEPEYPKGI	R	acetyl-d3 (protein N-term); ethanolamine (DE); EDC(Y); acetyl-d3 (K)	P54819	1813.03	15
1074	A(+45.03)PSVPAAE(+43.04)PEYPK(+45.03)GI	-	M	APSVPAAEPEYPKGI	R	acetyl-d3 (protein N-term); ethanolamine (DE); acetyl-d3 (K)	P54819	1657.88	15
1075	A(+45.03)PVE(+43.04)HVVAD(+43.04)AGAFL	-	M	APVEHVVADAGAFL	R	acetyl-d3 (protein N-term); ethanolamine (DE); ethanolamine (DE)	Q9ULX3	1525.83	14
1076	A(+45.03)PVE(+43.04)HVVADAGAFL	-	M	APVEHVVADAGAFL	R	acetyl-d3 (protein N-term); ethanolamine (DE)	Q9ULX3	1482.79	14
1077	A(+45.03)PVEHVVAD(+43.04)AGAFL	-	M	APVEHVVADAGAFL	R	acetyl-d3 (protein N-term); ethanolamine (DE)	Q9ULX3	1482.79	14
1078	A(+45.03)PVK(+45.03)K(+45.03)LVVK(+45.03)	-	M	APVKKLVVK	G	acetyl-d3 (protein N-term); acetyl-d3 (K); acetyl-d3 (K); acetyl-d3 (K)	P35268	1160.79	9
1079	A(+45.03)PVK(+45.03)K(+45.03)LVVK(+45.03)G	-	M	APVKKLVVKG	G	acetyl-d3 (protein N-term); acetyl-d3 (K); acetyl-d3 (K); acetyl-d3 (K)	P35268	1217.81	10
1080	A(+45.03)PVK(+45.03)K(+45.03)LVVK(+45.03)GG	-	M	APVKKLVVKGG	K	acetyl-d3 (protein N-term); acetyl-d3 (K); acetyl-d3 (K); acetyl-d3 (K)	P35268	1274.84	11
1081	A(+45.03)PVK(+45.03)K(+45.03)LVVK(+45.03)GGK(+45.03)	-	M	APVKKLVVKGGK	K	acetyl-d3 (protein N-term); acetyl-d3 (K); acetyl-d3 (K); acetyl-d3 (K); acetyl-d3 (K)	P35268	1447.96	12
1082	A(+45.03)PVK(+45.03)K(+45.03)LVVK(+45.03)GGK(+45.03)K(+45.03)	-	M	APVKKLVVKGGKK	K	acetyl-d3 (protein N-term); acetyl-d3 (K); acetyl-d3 (K); acetyl-d3 (K); acetyl-d3 (K); more	P35268	1621.08	13
1083	A(+45.03)PVK(+45.03)K(+45.03)LVVK(+45.03)GGK(+45.03)K(+45.03)K(+45.03)	-	M	APVKKLVVKGGKKK	K	acetyl-d3 (protein N-term); acetyl-d3 (K); acetyl-d3 (K); acetyl-d3 (K); acetyl-d3 (K); more	P35268	1794.21	14
1084	A(+45.03)PVK(+45.03)K(+45.03)LVVK(+45.03)GGK(+45.03)K(+45.03)K(+45.03)K(+45.03)	-	M	APVKKLVVKGGKKKK	Q	acetyl-d3 (protein N-term); acetyl-d3 (K); acetyl-d3 (K); acetyl-d3 (K); acetyl-d3 (K); more	P35268	1967.33	15
1085	A(+45.03)PVK(+45.03)K(+45.03)LVVK(+45.03)GGK(+45.03)K(+45.03)K(+45.03)K(+45.03)Q	-	M	APVKKLVVKGGKKKKQ	V	acetyl-d3 (protein N-term); acetyl-d3 (K); acetyl-d3 (K); acetyl-d3 (K); acetyl-d3 (K); more	P35268	2095.39	16
1086	A(+45.03)PVK(+45.03)K(+45.03)LVVK(+45.03)GGK(+45.03)K(+45.03)K(+45.03)K(+45.03)QVL	-	M	APVKKLVVKGGKKKKQVL	K	acetyl-d3 (protein N-term); acetyl-d3 (K); acetyl-d3 (K); acetyl-d3 (K); acetyl-d3 (K); more	P35268	2307.54	18
1087	A(+45.03)PVK(+45.03)K(+45.03)LVVK(+45.03)GGK(+45.03)K(+45.03)K(+45.03)K(+45.03)QVLK(+45.03)	-	M	APVKKLVVKGGKKKKQVLK	F	acetyl-d3 (protein N-term); acetyl-d3 (K); acetyl-d3 (K); acetyl-d3 (K); acetyl-d3 (K); more	P35268	2480.67	19
1088	A(+45.03)PVK(+45.03)K(+45.03)LVVK(+45.03)GGK(+45.03)K(+45.03)K(+45.03)K(+45.03)QVLK(+45.03)F	-	M	APVKKLVVKGGKKKKQVLKF	T	acetyl-d3 (protein N-term); acetyl-d3 (K); acetyl-d3 (K); acetyl-d3 (K); acetyl-d3 (K); more	P35268	2627.74	20
1089	A(+45.03)PVK(+45.03)K(+45.03)LVVK(+45.03)GGK(+45.03)K(+45.03)K(+45.03)K(+45.03)QVLK(+45.03)FTLD(+43.04)C(+57.02)THPV(+43.04)	-	M	APVKKLVVKGGKKKKQVLKFTLDCTHPV	E	acetyl-d3 (protein N-term); acetyl-d3 (K); acetyl-d3 (K); acetyl-d3 (K); acetyl-d3 (K); more	P35268	3637.24	28
1090	A(+45.03)RGPK(+45.03)K(+45.03)HLK(+45.03)	-，-，-	M，M，M	ARGPKKHLK	R，R，R	acetyl-d3 (protein N-term); acetyl-d3 (K); acetyl-d3 (K); acetyl-d3 (K)	Q8TD47，P62701，P22090	1213.77	9
1091	A(+45.03)SGVAVSD(+43.04)GVIK(+45.03)VFND(+43.04)M(+15.99)K(+45.03)V	-	M	ASGVAVSDGVIKVFNDMKV	R	acetyl-d3 (protein N-term); ethanolamine (DE); acetyl-d3 (K); ethanolamine (DE); Oxidation (M); more	P23528	2172.18	19
1092	A(+45.03)VFD(+43.04)TPE(+43.04)E(+43.04)AFGVL	-	M	AVFDTPEEAFGVL	R	acetyl-d3 (protein N-term); ethanolamine (DE); ethanolamine (DE); ethanolamine (DE)	O43156	1567.83	13
1093	A(+45.03)VK(+45.03)K(+45.03)IAIFGATGQTGLTTLAQAVQ	-	M	AVKKIAIFGATGQTGLTTLAQAVQ	A	acetyl-d3 (protein N-term); acetyl-d3 (K); acetyl-d3 (K)	P30043	2521.45	24
1094	AAAAAATAAAAASI	-	M	AAAAAATAAAAASI	R		Q8WVM8	1100.58	14
1095	AAGTLYTY	-	M	AAGTLYTY	P		P26641	858.412	8
1096	AD(+43.04)AAPQLGK(+45.03)	-	M	ADAAPQLGK	R	ethanolamine (DE); acetyl-d3 (K)	Q96C86	957.532	9
1097	AE(+43.04)VE(+43.04)QK(+45.03)K(+45.03)K(+45.03)	-	M	AEVEQKKK	R	ethanolamine (DE); ethanolamine (DE); acetyl-d3 (K); acetyl-d3 (K); acetyl-d3 (K)	P62841	1179.72	8
1098	AFK(+45.03)D(+43.04)TGK(+45.03)TPVE(+43.04)PE(+43.04)VAIH	-	M	AFKDTGKTPVEPEVAIH	R	acetyl-d3 (K); ethanolamine (DE); acetyl-d3 (K); ethanolamine (DE); ethanolamine (DE)	P60866	2057.14	17
1099	AGGK(+45.03)AGK(+45.03)D(+43.04)SGK(+45.03)AK(+45.03)AK(+45.03)AVS	-	M	AGGKAGKDSGKAKAKAVS	R	acetyl-d3 (K); acetyl-d3 (K); ethanolamine (DE); acetyl-d3 (K); acetyl-d3 (K); more	Q71UI9	1898.11	18
1100	AGGK(+45.03)AGK(+45.03)D(+43.04)SGK(+45.03)AK(+45.03)TK(+45.03)AVS	-	M	AGGKAGKDSGKAKTKAVS	R	acetyl-d3 (K); acetyl-d3 (K); ethanolamine (DE); acetyl-d3 (K); acetyl-d3 (K); more	P0C0S5	1928.12	18
1101	AGSRGAGRTAAPSV	-	M	AGSRGAGRTAAPSV	R		Q14137	1256.66	14
1102	AK(+45.03)AK(+45.03)K(+45.03)VGA	-	M	AKAKKVGA	R	acetyl-d3 (K); acetyl-d3 (K); acetyl-d3 (K)	P78316	906.585	8
1103	AK(+45.03)SGGC(+57.02)GAGAGVGGGN	-	M	AKSGGCGAGAGVGGGN	G	acetyl-d3 (K); Carbamidomethylation	Q02880	1320.59	16
1104	C(+57.02)(+42.01)D(+43.04)FTE(+43.04)D(+43.04)QTA	-	M	CDFTEDQTA	E	Carbamidomethylation; Acetylation (Protein N-term); ethanolamine (DE); ethanolamine (DE); ethanolamine (DE)	P60660	1256.53	9
1105	C(+57.02)(+42.01)D(+43.04)FTE(+43.04)D(+43.04)QTAE(+43.04)	-	M	CDFTEDQTAE	F	Carbamidomethylation; Acetylation (Protein N-term); ethanolamine (DE); ethanolamine (DE); ethanolamine (DE); more	P60660	1428.62	10
1106	C(+57.02)(+42.01)D(+43.04)FTE(+43.04)D(+43.04)QTAE(+43.04)FK(+45.03)	-	M	CDFTEDQTAEFK	E	Carbamidomethylation; Acetylation (Protein N-term); ethanolamine (DE); ethanolamine (DE); ethanolamine (DE); more	P60660	1748.81	12
1107	C(+57.02)(+42.01)D(+43.04)FTE(+43.04)D(+43.04)QTAE(+43.04)FK(+45.03)E(+43.04)	-	M	CDFTEDQTAEFKE	A	Carbamidomethylation; Acetylation (Protein N-term); ethanolamine (DE); ethanolamine (DE); ethanolamine (DE); more	P60660	1920.9	13
1108	C(+57.02)(+42.01)D(+43.04)FTE(+43.04)D(+43.04)QTAE(+43.04)FK(+45.03)E(+43.04)A	-	M	CDFTEDQTAEFKEA	F	Carbamidomethylation; Acetylation (Protein N-term); ethanolamine (DE); ethanolamine (DE); ethanolamine (DE); more	P60660	1991.93	14
1109	C(+57.02)(+42.01)D(+43.04)FTE(+43.04)D(+43.04)QTAE(+43.04)FK(+45.03)EA(+43.04)	-	M	CDFTEDQTAEFKEA	F	Carbamidomethylation; Acetylation (Protein N-term); ethanolamine (DE); ethanolamine (DE); ethanolamine (DE); more	P60660	1991.93	14
1110	C(+57.02)(+42.01)D(+43.04)FTE(+43.04)D(+43.04)QTAE(+43.04)FK(+45.03)EAFQLFD(+43.04)(+43.04)	-	M	CDFTEDQTAEFKEAFQLFD	R	Carbamidomethylation; Acetylation (Protein N-term); ethanolamine (DE); ethanolamine (DE); ethanolamine (DE); more	P60660	2685.28	19
1111	C(+57.02)(+42.01)D(+43.04)RK(+45.03)AVIK(+45.03)NAD(+43.04)M	-	M	CDRKAVIKNADM	S	Carbamidomethylation; Acetylation (Protein N-term); ethanolamine (DE); acetyl-d3 (K); acetyl-d3 (K); more	P63167	1637.85	12
1112	C(+57.02)(+42.01)D(+43.04)RK(+45.03)AVIK(+45.03)NAD(+43.04)M(+15.99)	-	M	CDRKAVIKNADM	S	Carbamidomethylation; Acetylation (Protein N-term); ethanolamine (DE); acetyl-d3 (K); acetyl-d3 (K); more	P63167	1653.84	12
1113	C(+57.02)(+42.01)D(+43.04)RK(+45.03)AVIK(+45.03)NAD(+43.04)M(+15.99)S	-	M	CDRKAVIKNADMS	E	Carbamidomethylation; Acetylation (Protein N-term); ethanolamine (DE); acetyl-d3 (K); acetyl-d3 (K); more	P63167	1740.88	13
1114	C(+57.02)(+42.01)D(+43.04)RK(+45.03)AVIK(+45.03)NAD(+43.04)M(+15.99)SE(+43.04)	-	M	CDRKAVIKNADMSE	E	Carbamidomethylation; Acetylation (Protein N-term); ethanolamine (DE); acetyl-d3 (K); acetyl-d3 (K); more	P63167	1912.96	14
1115	C(+57.02)(+42.01)D(+43.04)RK(+45.03)AVIK(+45.03)NAD(+43.04)MSE(+43.04)	-	M	CDRKAVIKNADMSE	E	Carbamidomethylation; Acetylation (Protein N-term); ethanolamine (DE); acetyl-d3 (K); acetyl-d3 (K); more	P63167	1896.97	14
1116	C(+57.02)(+42.01)D(+43.04)RK(+45.03)AVIK(+45.03)NADM(+15.99)(+43.04)	-	M	CDRKAVIKNADM	S	Carbamidomethylation; Acetylation (Protein N-term); ethanolamine (DE); acetyl-d3 (K); acetyl-d3 (K); more	P63167	1653.84	12
1117	C(+57.02)(+42.01)D(+43.04)RK(+45.03)AVIK(+45.03)NADM(+43.04)	-	M	CDRKAVIKNADM	S	Carbamidomethylation; Acetylation (Protein N-term); ethanolamine (DE); acetyl-d3 (K); acetyl-d3 (K); more	P63167	1637.85	12
1118	C(+57.02)(+42.01)DRK(+45.03)AVIK(+45.03)NAD(+43.04)M(+15.99)S	-	M	CDRKAVIKNADMS	E	Carbamidomethylation; Acetylation (Protein N-term); acetyl-d3 (K); acetyl-d3 (K); ethanolamine (DE); more	P63167	1697.83	13
1119	C(+57.02)(+42.01)DRK(+45.03)AVIK(+45.03)NAD(+43.04)M(+15.99)SE(+43.04)	-	M	CDRKAVIKNADMSE	E	Carbamidomethylation; Acetylation (Protein N-term); acetyl-d3 (K); acetyl-d3 (K); ethanolamine (DE); more	P63167	1869.92	14
1120	C(+57.02)(+42.01)NTPTYC(+57.02)D(+43.04)L	-	M	CNTPTYCDL	G	Carbamidomethylation; Acetylation (Protein N-term); Carbamidomethylation; ethanolamine (DE)	Q9Y277	1227.49	9
1121	D(+42.01)(+43.04)D(+43.04)D(+43.04)IAALVVD(+43.04)N	-	M	DDDIAALVVDN	G	Acetylation (Protein N-term); ethanolamine (DE); ethanolamine (DE); ethanolamine (DE); ethanolamine (DE)	P60709	1372.72	11
1122	D(+42.01)(+43.04)D(+43.04)D(+43.04)IAALVVD(+43.04)NG	-	M	DDDIAALVVDNG	S	Acetylation (Protein N-term); ethanolamine (DE); ethanolamine (DE); ethanolamine (DE); ethanolamine (DE)	P60709	1429.74	12
1123	D(+42.01)(+43.04)D(+43.04)D(+43.04)IAALVVD(+43.04)NGSGM(+15.99)C(+57.02)K(+45.03)AGFAGD(+43.04)DAP	-	M	DDDIAALVVDNGSGMCKAGFAGDDAP	R	Acetylation (Protein N-term); ethanolamine (DE); ethanolamine (DE); ethanolamine (DE); ethanolamine (DE); more	P60709	2898.36	26
1124	D(+42.01)(+43.04)D(+43.04)D(+43.04)IAALVVD(+43.04)NGSGM(+15.99)C(+57.02)K(+45.03)AGFAGD(+43.04)DAPRAVFPSIVG	-	M	DDDIAALVVDNGSGMCKAGFAGDDAPRAVFPSIVG	R	Acetylation (Protein N-term); ethanolamine (DE); ethanolamine (DE); ethanolamine (DE); ethanolamine (DE); more	P60709	3824.89	35
1125	D(+42.01)(+43.04)D(+43.04)D(+43.04)IAALVVD(+43.04)NGSGMC(+57.02)K(+45.03)AGFAGD(+43.04)D(+43.04)AP	-	M	DDDIAALVVDNGSGMCKAGFAGDDAP	R	Acetylation (Protein N-term); ethanolamine (DE); ethanolamine (DE); ethanolamine (DE); ethanolamine (DE); more	P60709	2925.4	26
1126	D(+42.01)(+43.04)D(+43.04)D(+43.04)IAALVVD(+43.04)NGSGMC(+57.02)K(+45.03)AGFAGD(+43.04)DAP(+43.04)	-	M	DDDIAALVVDNGSGMCKAGFAGDDAP	R	Acetylation (Protein N-term); ethanolamine (DE); ethanolamine (DE); ethanolamine (DE); ethanolamine (DE); more	P60709	2925.4	26
1127	D(+42.01)(+43.04)D(+43.04)D(+43.04)IAALVVD(+43.04)NGSGMC(+57.02)K(+45.03)AGFAGDD(+43.04)AP(+43.04)	-	M	DDDIAALVVDNGSGMCKAGFAGDDAP	R	Acetylation (Protein N-term); ethanolamine (DE); ethanolamine (DE); ethanolamine (DE); ethanolamine (DE); more	P60709	2925.4	26
1128	D(+42.01)(+43.04)D(+43.04)D(+43.04)IAALVVDNGSGM(+15.99)C(+57.02)K(+45.03)AGFAGD(+43.04)D(+43.04)AP	-	M	DDDIAALVVDNGSGMCKAGFAGDDAP	R	Acetylation (Protein N-term); ethanolamine (DE); ethanolamine (DE); ethanolamine (DE); Oxidation (M); more	P60709	2898.36	26
1129	D(+42.01)(+43.04)D(+43.04)DIAALVVD(+43.04)NGSGM(+15.99)C(+57.02)K(+45.03)AGFAGD(+43.04)DAP	-	M	DDDIAALVVDNGSGMCKAGFAGDDAP	R	Acetylation (Protein N-term); ethanolamine (DE); ethanolamine (DE); ethanolamine (DE); Oxidation (M); more	P60709	2855.31	26
1130	D(+42.01)(+43.04)D(+43.04)DIAALVVD(+43.04)NGSGM(+15.99)C(+57.02)K(+45.03)AGFAGD(+43.04)DAP(+43.04)	-	M	DDDIAALVVDNGSGMCKAGFAGDDAP	R	Acetylation (Protein N-term); ethanolamine (DE); ethanolamine (DE); ethanolamine (DE); Oxidation (M); more	P60709	2898.36	26
1131	D(+42.01)(+43.04)D(+43.04)DIAALVVD(+43.04)NGSGM(+15.99)C(+57.02)K(+45.03)AGFAGDDAP(+43.04)	-	M	DDDIAALVVDNGSGMCKAGFAGDDAP	R	Acetylation (Protein N-term); ethanolamine (DE); ethanolamine (DE); ethanolamine (DE); Oxidation (M); more	P60709	2855.31	26
1132	D(+42.01)(+43.04)D(+43.04)DIAALVVD(+43.04)NGSGMC(+57.02)K(+45.03)AGFAGD(+43.04)D(+43.04)AP	-	M	DDDIAALVVDNGSGMCKAGFAGDDAP	R	Acetylation (Protein N-term); ethanolamine (DE); ethanolamine (DE); ethanolamine (DE); Carbamidomethylation; more	P60709	2882.36	26
1133	D(+42.01)(+43.04)D(+43.04)DIAALVVD(+43.04)NGSGMC(+57.02)K(+45.03)AGFAGD(+43.04)DAP	-	M	DDDIAALVVDNGSGMCKAGFAGDDAP	R	Acetylation (Protein N-term); ethanolamine (DE); ethanolamine (DE); ethanolamine (DE); Carbamidomethylation; more	P60709	2839.32	26
1134	D(+42.01)(+43.04)D(+43.04)DIAALVVDNGSGMC(+57.02)K(+45.03)AGFAGD(+43.04)D(+43.04)AP	-	M	DDDIAALVVDNGSGMCKAGFAGDDAP	R	Acetylation (Protein N-term); ethanolamine (DE); ethanolamine (DE); Carbamidomethylation; acetyl-d3 (K); more	P60709	2839.32	26
1135	D(+42.01)(+43.04)D(+43.04)DIAALVVDNGSGMC(+57.02)K(+45.03)AGFAGD(+43.04)DAP(+43.04)	-	M	DDDIAALVVDNGSGMCKAGFAGDDAP	R	Acetylation (Protein N-term); ethanolamine (DE); ethanolamine (DE); Carbamidomethylation; acetyl-d3 (K); more	P60709	2839.32	26
1136	D(+42.01)(+43.04)DD(+43.04)IAALVVD(+43.04)NGSGM(+15.99)C(+57.02)K(+45.03)AGFAGD(+43.04)DAP(+43.04)	-	M	DDDIAALVVDNGSGMCKAGFAGDDAP	R	Acetylation (Protein N-term); ethanolamine (DE); ethanolamine (DE); ethanolamine (DE); Oxidation (M); more	P60709	2898.36	26
1137	D(+42.01)(+43.04)DD(+43.04)IAALVVD(+43.04)NGSGM(+15.99)C(+57.02)K(+45.03)AGFAGDD(+43.04)AP	-	M	DDDIAALVVDNGSGMCKAGFAGDDAP	R	Acetylation (Protein N-term); ethanolamine (DE); ethanolamine (DE); ethanolamine (DE); Oxidation (M); more	P60709	2855.31	26
1138	D(+42.01)(+43.04)DD(+43.04)IAALVVD(+43.04)NGSGMC(+57.02)K(+45.03)AGFAGD(+43.04)D(+43.04)AP	-	M	DDDIAALVVDNGSGMCKAGFAGDDAP	R	Acetylation (Protein N-term); ethanolamine (DE); ethanolamine (DE); ethanolamine (DE); Carbamidomethylation; more	P60709	2882.36	26
1139	D(+42.01)(+43.04)DD(+43.04)IAALVVD(+43.04)NGSGMC(+57.02)K(+45.03)AGFAGD(+43.04)DAP(+43.04)	-	M	DDDIAALVVDNGSGMCKAGFAGDDAP	R	Acetylation (Protein N-term); ethanolamine (DE); ethanolamine (DE); ethanolamine (DE); Carbamidomethylation; more	P60709	2882.36	26
1140	D(+42.01)(+43.04)DD(+43.04)IAALVVD(+43.04)NGSGMC(+57.02)K(+45.03)AGFAGDD(+43.04)AP(+43.04)	-	M	DDDIAALVVDNGSGMCKAGFAGDDAP	R	Acetylation (Protein N-term); ethanolamine (DE); ethanolamine (DE); ethanolamine (DE); Carbamidomethylation; more	P60709	2882.36	26
1141	D(+42.01)(+43.04)DDIAALVVD(+43.04)NGSGM(+15.99)C(+57.02)K(+45.03)AGFAGDD(+43.04)AP	-	M	DDDIAALVVDNGSGMCKAGFAGDDAP	R	Acetylation (Protein N-term); ethanolamine (DE); ethanolamine (DE); Oxidation (M); Carbamidomethylation; more	P60709	2812.27	26
1142	D(+42.01)(+43.04)DDIAALVVD(+43.04)NGSGMC(+57.02)K(+45.03)AGFAGD(+43.04)D(+43.04)AP	-	M	DDDIAALVVDNGSGMCKAGFAGDDAP	R	Acetylation (Protein N-term); ethanolamine (DE); ethanolamine (DE); Carbamidomethylation; acetyl-d3 (K); more	P60709	2839.32	26
1143	D(+43.04)GVTPTLSTI	-	M	DGVTPTLSTI	R	ethanolamine (DE)	Q8IWV1	1045.57	10
1144	E(+27.99)(+43.04)EEC(+57.02)RVLSIQSHVIRGYVGN(+43.04)	-	M	EEECRVLSIQSHVIRGYVGN	R	Formylation (Protein N-term); ethanolamine (DE); Carbamidomethylation; ethanolamine (C-term)	O00764	2458.24	20
1145	E(+42.01)(+43.04)E(+43.04)E(+43.04)IAALVID(+43.04)	-	M	EEEIAALVID	N	Acetylation (Protein N-term); ethanolamine (DE); ethanolamine (DE); ethanolamine (DE); ethanolamine (DE)	P63261	1314.74	10
1146	E(+42.01)(+43.04)E(+43.04)E(+43.04)IAALVID(+43.04)N	-	M	EEEIAALVIDN	G	Acetylation (Protein N-term); ethanolamine (DE); ethanolamine (DE); ethanolamine (DE); ethanolamine (DE)	P63261	1428.78	11
1147	E(+42.01)(+43.04)E(+43.04)E(+43.04)IAALVID(+43.04)NGSGM(+15.99)C(+57.02)K(+45.03)AGFAGD(+43.04)DAP	-	M	EEEIAALVIDNGSGMCKAGFAGDDAP	R	Acetylation (Protein N-term); ethanolamine (DE); ethanolamine (DE); ethanolamine (DE); ethanolamine (DE); more	P63261	2954.42	26
1148	E(+42.01)(+43.04)E(+43.04)E(+43.04)IAALVID(+43.04)NGSGM(+15.99)C(+57.02)K(+45.03)AGFAGDD(+43.04)AP	-	M	EEEIAALVIDNGSGMCKAGFAGDDAP	R	Acetylation (Protein N-term); ethanolamine (DE); ethanolamine (DE); ethanolamine (DE); ethanolamine (DE); more	P63261	2954.42	26
1149	E(+42.01)(+43.04)E(+43.04)E(+43.04)IAALVID(+43.04)NGSGMC(+57.02)K(+45.03)AGFAGD(+43.04)D(+43.04)AP	-	M	EEEIAALVIDNGSGMCKAGFAGDDAP	R	Acetylation (Protein N-term); ethanolamine (DE); ethanolamine (DE); ethanolamine (DE); ethanolamine (DE); more	P63261	2981.47	26
1150	E(+42.01)(+43.04)E(+43.04)E(+43.04)IAALVID(+43.04)NGSGMC(+57.02)K(+45.03)AGFAGDD(+43.04)AP	-	M	EEEIAALVIDNGSGMCKAGFAGDDAP	R	Acetylation (Protein N-term); ethanolamine (DE); ethanolamine (DE); ethanolamine (DE); ethanolamine (DE); more	P63261	2938.42	26
1151	E(+42.01)(+43.04)EE(+43.04)IAALVID(+43.04)NGSGM(+15.99)C(+57.02)K(+45.03)AGFAGDDAP(+43.04)	-	M	EEEIAALVIDNGSGMCKAGFAGDDAP	R	Acetylation (Protein N-term); ethanolamine (DE); ethanolamine (DE); ethanolamine (DE); Oxidation (M); more	P63261	2911.38	26
1152	E(+43.04)GPLSVFGD(+43.04)RSTGE(+43.04)TI	-	M	EGPLSVFGDRSTGETI	R	ethanolamine (DE); ethanolamine (DE); ethanolamine (DE)	P17987	1792.93	16
1153	E(+43.04)SYHK(+45.03)PD(+43.04)QQK(+45.03)LQ	-	M	ESYHKPDQQKLQ	A	ethanolamine (DE); acetyl-d3 (K); ethanolamine (DE); acetyl-d3 (K)	P29401	1675.88	12
1154	E(+45.03)(+43.04)SYHK(+45.03)PD(+43.04)QQK(+45.03)LQ	-	M	ESYHKPDQQKLQ	A	acetyl-d3 (protein N-term); ethanolamine (DE); acetyl-d3 (K); ethanolamine (DE); acetyl-d3 (K)	P29401	1720.91	12
1155	G(+42.01)D(+43.04)AK(+45.03)E(+43.04)AGAE(+43.04)GPPAGAAA	-	M	GDAKEAGAEGPPAGAAA	R	Acetylation (Protein N-term); ethanolamine (DE); acetyl-d3 (K); ethanolamine (DE); ethanolamine (DE)	Q3B7T1	1654.84	17
1156	G(+42.01)D(+43.04)APSPE(+43.04)E(+43.04)K(+45.03)LHLIT	-	M	GDAPSPEEKLHLIT	R	Acetylation (Protein N-term); ethanolamine (DE); ethanolamine (DE); ethanolamine (DE); acetyl-d3 (K)	P54577	1721.94	14
1157	G(+42.01)D(+43.04)APSPE(+43.04)EK(+45.03)LHLIT	-	M	GDAPSPEEKLHLIT	R	Acetylation (Protein N-term); ethanolamine (DE); ethanolamine (DE); acetyl-d3 (K)	P54577	1678.9	14
1158	G(+42.01)D(+43.04)D(+43.04)RPFVC(+57.02)NAPGC(+57.02)GQ	-	M	GDDRPFVCNAPGCGQ	R	Acetylation (Protein N-term); ethanolamine (DE); ethanolamine (DE); Carbamidomethylation; Carbamidomethylation	P17544	1776.77	15
1159	G(+42.01)D(+43.04)PSK(+45.03)QD(+43.04)ILTIFK(+45.03)	-	M	GDPSKQDILTIFK	R	Acetylation (Protein N-term); ethanolamine (DE); acetyl-d3 (K); ethanolamine (DE); acetyl-d3 (K)	Q9NP61	1678.94	13
1160	G(+42.01)D(+43.04)VE(+43.04)K(+45.03)GK(+45.03)K(+45.03)IF	-	M	GDVEKGKKIF	I	Acetylation (Protein N-term); ethanolamine (DE); ethanolamine (DE); acetyl-d3 (K); acetyl-d3 (K); more	P99999	1382.81	10
1161	G(+42.01)D(+43.04)VK(+45.03)NFLYAWC(+57.02)GK(+45.03)	-	M	GDVKNFLYAWCGK	R	Acetylation (Protein N-term); ethanolamine (DE); acetyl-d3 (K); Carbamidomethylation; acetyl-d3 (K)	Q08211	1731.86	13
1162	G(+42.01)K(+45.03)E(+43.04)K(+45.03)THINIVVIGHVD(+43.04)	-，-，-	M，M，M	GKEKTHINIVVIGHVD	S，S，S	Acetylation (Protein N-term); acetyl-d3 (K); ethanolamine (DE); acetyl-d3 (K); ethanolamine (DE)	Q05639，Q5VTE0，P68104	1976.13	16
1163	G(+42.01)K(+45.03)E(+43.04)K(+45.03)THINIVVIGHVD(+43.04)SGK(+45.03)	-，-，-	M，M，M	GKEKTHINIVVIGHVDSGK	S，S，S	Acetylation (Protein N-term); acetyl-d3 (K); ethanolamine (DE); acetyl-d3 (K); ethanolamine (DE); more	Q05639，Q5VTE0，P68104	2293.31	19
1164	G(+42.01)K(+45.03)E(+43.04)K(+45.03)THINIVVIGHVD(+43.04)SGK(+45.03)STTTGH	-，-，-	M，M，M	GKEKTHINIVVIGHVDSGKSTTTGH	L，L，L	Acetylation (Protein N-term); acetyl-d3 (K); ethanolamine (DE); acetyl-d3 (K); ethanolamine (DE); more	Q05639，Q5VTE0，P68104	2877.57	25
1165	G(+42.01)K(+45.03)E(+43.04)K(+45.03)THINIVVIGHVD(+43.04)SGK(+45.03)STTTGHL	-，-，-	M，M，M	GKEKTHINIVVIGHVDSGKSTTTGHL	I，I，I	Acetylation (Protein N-term); acetyl-d3 (K); ethanolamine (DE); acetyl-d3 (K); ethanolamine (DE); more	Q05639，Q5VTE0，P68104	2990.65	26
1166	G(+45.03)AYK(+45.03)YIQ	-	M	GAYKYIQ	E	acetyl-d3 (protein N-term); acetyl-d3 (K)	P61313	931.492	7
1167	G(+45.03)AYK(+45.03)YIQE(+43.04)LW	-	M	GAYKYIQELW	R	acetyl-d3 (protein N-term); acetyl-d3 (K); ethanolamine (DE)	P61313	1402.74	10
1168	G(+45.03)AYK(+45.03)YIQELW	-	M	GAYKYIQELW	R	acetyl-d3 (protein N-term); acetyl-d3 (K)	P61313	1359.7	10
1169	G(+45.03)C(+57.02)K(+45.03)VLLNIGQQM(+15.99)L	-	M	GCKVLLNIGQQML	R	acetyl-d3 (protein N-term); Carbamidomethylation; acetyl-d3 (K); Oxidation (M)	P30825	1578.84	13
1170	G(+45.03)C(+57.02)K(+45.03)VLLNIGQQML	-	M	GCKVLLNIGQQML	R	acetyl-d3 (protein N-term); Carbamidomethylation; acetyl-d3 (K)	P30825	1562.84	13
1171	G(+45.03)C(+57.02)LGNSK(+45.03)TE(+43.04)D(+43.04)Q	-	M	GCLGNSKTEDQ	R	acetyl-d3 (protein N-term); Carbamidomethylation; acetyl-d3 (K); ethanolamine (DE); ethanolamine (DE)	P63092	1383.66	11
1172	G(+45.03)C(+57.02)LGNSK(+45.03)TE(+43.04)DQ(+43.04)	-	M	GCLGNSKTEDQ	R	acetyl-d3 (protein N-term); Carbamidomethylation; acetyl-d3 (K); ethanolamine (DE); ethanolamine (C-term)	P63092	1383.66	11
1173	G(+45.03)C(+57.02)LGNSK(+45.03)TED(+43.04)Q(+43.04)	-	M	GCLGNSKTEDQ	R	acetyl-d3 (protein N-term); Carbamidomethylation; acetyl-d3 (K); ethanolamine (DE); ethanolamine (C-term)	P63092	1383.66	11
1174	G(+45.03)FGD(+43.04)LK(+45.03)SPAGL	-	M	GFGDLKSPAGL	Q	acetyl-d3 (protein N-term); ethanolamine (DE); acetyl-d3 (K)	P24534	1193.66	11
1175	G(+45.03)FGD(+43.04)LK(+45.03)SPAGLQ	-	M	GFGDLKSPAGLQ	V	acetyl-d3 (protein N-term); ethanolamine (DE); acetyl-d3 (K)	P24534	1321.71	12
1176	G(+45.03)FGD(+43.04)LK(+45.03)SPAGLQVL	-	M	GFGDLKSPAGLQVL	N	acetyl-d3 (protein N-term); ethanolamine (DE); acetyl-d3 (K)	P24534	1533.87	14
1177	G(+45.03)FGD(+43.04)LK(+45.03)SPAGLQVLN	-	M	GFGDLKSPAGLQVLN	D	acetyl-d3 (protein N-term); ethanolamine (DE); acetyl-d3 (K)	P24534	1647.91	15
1178	G(+45.03)FGD(+43.04)LK(+45.03)SPAGLQVLND(+43.04)	-	M	GFGDLKSPAGLQVLND	Y	acetyl-d3 (protein N-term); ethanolamine (DE); acetyl-d3 (K); ethanolamine (DE)	P24534	1805.98	16
1179	G(+45.03)FGD(+43.04)LK(+45.03)SPAGLQVLND(+43.04)YL	-	M	GFGDLKSPAGLQVLNDYL	A	acetyl-d3 (protein N-term); ethanolamine (DE); acetyl-d3 (K); ethanolamine (DE)	P24534	2082.13	18
1180	G(+45.03)FGD(+43.04)LK(+45.03)SPAGLQVLND(+43.04)YLAD(+43.04)K(+45.03)	-	M	GFGDLKSPAGLQVLNDYLADK	S	acetyl-d3 (protein N-term); ethanolamine (DE); acetyl-d3 (K); ethanolamine (DE); ethanolamine (DE); more	P24534	2484.36	21
1181	G(+45.03)FLK(+45.03)LIE(+43.04)IE(+43.04)NFK(+45.03)	-	M	GFLKLIEIENFK	S	acetyl-d3 (protein N-term); acetyl-d3 (K); ethanolamine (DE); ethanolamine (DE); acetyl-d3 (K)	Q14683	1671	12
1182	G(+45.03)FVK(+45.03)VVK(+45.03)NK(+45.03)	-	M	GFVKVVKNK	A	acetyl-d3 (protein N-term); acetyl-d3 (K); acetyl-d3 (K); acetyl-d3 (K)	P46777	1197.75	9
1183	G(+45.03)FVK(+45.03)VVK(+45.03)NK(+45.03)A	-	M	GFVKVVKNKA	Y	acetyl-d3 (protein N-term); acetyl-d3 (K); acetyl-d3 (K); acetyl-d3 (K)	P46777	1268.79	10
1184	G(+45.03)FVK(+45.03)VVK(+45.03)NK(+45.03)AY	-	M	GFVKVVKNKAY	F	acetyl-d3 (protein N-term); acetyl-d3 (K); acetyl-d3 (K); acetyl-d3 (K)	P46777	1431.85	11
1185	G(+45.03)FVK(+45.03)VVK(+45.03)NK(+45.03)AYFK(+45.03)	-	M	GFVKVVKNKAYFK	R	acetyl-d3 (protein N-term); acetyl-d3 (K); acetyl-d3 (K); acetyl-d3 (K); acetyl-d3 (K)	P46777	1752.04	13
1186	G(+45.03)GK(+45.03)NK(+45.03)K(+45.03)HK(+45.03)APAAAVV	-	M	GGKNKKHKAPAAAVV	R	acetyl-d3 (protein N-term); acetyl-d3 (K); acetyl-d3 (K); acetyl-d3 (K); acetyl-d3 (K)	Q7Z478	1700.02	15
1187	G(+45.03)GLE(+43.04)K(+45.03)K(+45.03)K(+45.03)YE(+43.04)	-	M	GGLEKKKYE	R	acetyl-d3 (protein N-term); ethanolamine (DE); acetyl-d3 (K); acetyl-d3 (K); acetyl-d3 (K); more	O00541	1316.77	9
1188	G(+45.03)HQQLYWSH	-	M	GHQQLYWSH	P	acetyl-d3 (protein N-term)	P62273	1199.56	9
1189	G(+45.03)HQQLYWSHP	-	M	GHQQLYWSHP	R	acetyl-d3 (protein N-term)	P62273	1296.61	10
1190	G(+45.03)ILE(+43.04)K(+45.03)ISE(+43.04)IE(+43.04)K(+45.03)E(+43.04)IA	-	M	GILEKISEIEKEIA	R	acetyl-d3 (protein N-term); ethanolamine (DE); acetyl-d3 (K); ethanolamine (DE); ethanolamine (DE); more	P55039	1878.14	14
1191	G(+45.03)IQGLAK(+45.03)LIAD(+43.04)VAPSAI	-	M	GIQGLAKLIADVAPSAI	R	acetyl-d3 (protein N-term); acetyl-d3 (K); ethanolamine (DE)	P39748	1769.06	17
1192	G(+45.03)IQGLAK(+45.03)LIADVAPSAI	-	M	GIQGLAKLIADVAPSAI	R	acetyl-d3 (protein N-term); acetyl-d3 (K)	P39748	1726.01	17
1193	G(+45.03)K(+45.03)AK(+45.03)VPASK(+45.03)	-	M	GKAKVPASK	R	acetyl-d3 (protein N-term); acetyl-d3 (K); acetyl-d3 (K); acetyl-d3 (K)	Q9GZR2	1064.66	9
1194	G(+45.03)K(+45.03)D(+43.04)YYQTLGLA	-	M	GKDYYQTLGLA	R	acetyl-d3 (protein N-term); acetyl-d3 (K); ethanolamine (DE)	P25685	1360.71	11
1195	G(+45.03)K(+45.03)E(+43.04)QE(+43.04)LLE(+43.04)AA	-	M	GKEQELLEAA	R	acetyl-d3 (protein N-term); acetyl-d3 (K); ethanolamine (DE); ethanolamine (DE); ethanolamine (DE)	Q92625	1305.74	10
1196	G(+45.03)K(+45.03)FM(+15.99)K(+45.03)PGK(+45.03)VVL	-	M	GKFMKPGKVVL	V	acetyl-d3 (protein N-term); acetyl-d3 (K); Oxidation (M); acetyl-d3 (K); acetyl-d3 (K)	P61353	1398.83	11
1197	G(+45.03)K(+45.03)FM(+15.99)K(+45.03)PGK(+45.03)VVLVLAG	-	M	GKFMKPGKVVLVLAG	R	acetyl-d3 (protein N-term); acetyl-d3 (K); Oxidation (M); acetyl-d3 (K); acetyl-d3 (K)	P61353	1739.04	15
1198	G(+45.03)K(+45.03)FMK(+45.03)PGK(+45.03)VVL	-	M	GKFMKPGKVVL	V	acetyl-d3 (protein N-term); acetyl-d3 (K); acetyl-d3 (K); acetyl-d3 (K)	P61353	1382.84	11
1199	G(+45.03)K(+45.03)FMK(+45.03)PGK(+45.03)VVLVLAG	-	M	GKFMKPGKVVLVLAG	R	acetyl-d3 (protein N-term); acetyl-d3 (K); acetyl-d3 (K); acetyl-d3 (K)	P61353	1723.05	15
1200	G(+45.03)K(+45.03)GD(+43.04)PK(+45.03)K(+45.03)P	-，-	M，M	GKGDPKKP	R，R	acetyl-d3 (protein N-term); acetyl-d3 (K); ethanolamine (DE); acetyl-d3 (K); acetyl-d3 (K)	B2RPK0，P09429	1048.63	8
1201	G(+45.03)K(+45.03)GD(+43.04)PK(+45.03)K(+45.03)PR	-，-	M，M	GKGDPKKPR	G，G	acetyl-d3 (protein N-term); acetyl-d3 (K); ethanolamine (DE); acetyl-d3 (K); acetyl-d3 (K)	B2RPK0，P09429	1204.73	9
1202	G(+45.03)K(+45.03)GD(+43.04)PK(+45.03)K(+45.03)PRGK(+45.03)M(+15.99)S	-，-	M，M	GKGDPKKPRGKMS	S，S	acetyl-d3 (protein N-term); acetyl-d3 (K); ethanolamine (DE); acetyl-d3 (K); acetyl-d3 (K); more	B2RPK0，P09429	1668.94	13
1203	G(+45.03)K(+45.03)GD(+43.04)PK(+45.03)K(+45.03)PRGK(+45.03)M(+15.99)SSY	-，-	M，M	GKGDPKKPRGKMSSY	A，A	acetyl-d3 (protein N-term); acetyl-d3 (K); ethanolamine (DE); acetyl-d3 (K); acetyl-d3 (K); more	B2RPK0，P09429	1919.04	15
1204	G(+45.03)K(+45.03)GD(+43.04)PNK(+45.03)P	-	M	GKGDPNKP	R	acetyl-d3 (protein N-term); acetyl-d3 (K); ethanolamine (DE); acetyl-d3 (K)	P26583	989.549	8
1205	G(+45.03)K(+45.03)GD(+43.04)PNK(+45.03)PRGK(+45.03)	-	M	GKGDPNKPRGK	M	acetyl-d3 (protein N-term); acetyl-d3 (K); ethanolamine (DE); acetyl-d3 (K); acetyl-d3 (K)	P26583	1375.8	11
1206	G(+45.03)K(+45.03)GD(+43.04)PNK(+45.03)PRGK(+45.03)M(+15.99)SSY	-	M	GKGDPNKPRGKMSSY	A	acetyl-d3 (protein N-term); acetyl-d3 (K); ethanolamine (DE); acetyl-d3 (K); acetyl-d3 (K); more	P26583	1859.96	15
1207	G(+45.03)K(+45.03)GDPK(+45.03)K(+45.03)P	-，-	M，M	GKGDPKKP	R，R	acetyl-d3 (protein N-term); acetyl-d3 (K); acetyl-d3 (K); acetyl-d3 (K)	B2RPK0，P09429	1005.59	8
1208	G(+45.03)K(+45.03)K(+45.03)GK(+45.03)K(+45.03)E(+43.04)K(+45.03)K(+45.03)G	-	M	GKKGKKEKKG	R	acetyl-d3 (protein N-term); acetyl-d3 (K); acetyl-d3 (K); acetyl-d3 (K); acetyl-d3 (K); more	Q8TBB5	1444.94	10
1209	G(+45.03)K(+45.03)K(+45.03)GK(+45.03)VGK(+45.03)	-	M	GKKGKVGK	S	acetyl-d3 (protein N-term); acetyl-d3 (K); acetyl-d3 (K); acetyl-d3 (K); acetyl-d3 (K)	Q8IY81	1025.67	8
1210	G(+45.03)K(+45.03)K(+45.03)GK(+45.03)VGK(+45.03)S	-	M	GKKGKVGKS	R	acetyl-d3 (protein N-term); acetyl-d3 (K); acetyl-d3 (K); acetyl-d3 (K); acetyl-d3 (K)	Q8IY81	1112.7	9
1211	G(+45.03)K(+45.03)K(+45.03)GK(+45.03)VGK(+45.03)SR	-	M	GKKGKVGKSR	R	acetyl-d3 (protein N-term); acetyl-d3 (K); acetyl-d3 (K); acetyl-d3 (K); acetyl-d3 (K)	Q8IY81	1268.8	10
1212	G(+45.03)K(+45.03)SD(+43.04)FLTPK(+45.03)AIAN	-	M	GKSDFLTPKAIAN	R	acetyl-d3 (protein N-term); acetyl-d3 (K); ethanolamine (DE); acetyl-d3 (K)	O60870	1538.87	13
1213	G(+45.03)K(+45.03)VK(+45.03)VGVN	-	M	GKVKVGVN	G	acetyl-d3 (protein N-term); acetyl-d3 (K); acetyl-d3 (K)	P04406	934.58	8
1214	G(+45.03)K(+45.03)VK(+45.03)VGVNG	-	M	GKVKVGVNG	F	acetyl-d3 (protein N-term); acetyl-d3 (K); acetyl-d3 (K)	P04406	991.601	9
1215	G(+45.03)K(+45.03)VK(+45.03)VGVNGFG	-	M	GKVKVGVNGFG	R	acetyl-d3 (protein N-term); acetyl-d3 (K); acetyl-d3 (K)	P04406	1195.69	11
1216	G(+45.03)K(+45.03)VNVAK(+45.03)L	-	M	GKVNVAKL	R	acetyl-d3 (protein N-term); acetyl-d3 (K); acetyl-d3 (K)	Q9BVS4	962.611	8
1217	G(+45.03)LC(+57.02)K(+45.03)C(+57.02)PK(+45.03)	-	M	GLCKCPK	R	acetyl-d3 (protein N-term); Carbamidomethylation; acetyl-d3 (K); Carbamidomethylation; acetyl-d3 (K)	O95159	996.508	7
1218	G(+45.03)LK(+45.03)AAQK(+45.03)TLFPL	-	M	GLKAAQKTLFPL	R	acetyl-d3 (protein N-term); acetyl-d3 (K); acetyl-d3 (K)	O00255	1420.86	12
1219	G(+45.03)LLD(+43.04)LC(+57.02)E(+43.04)E(+43.04)VFGTAD(+43.04)LY	-	M	GLLDLCEEVFGTADLY	R	acetyl-d3 (protein N-term); ethanolamine (DE); Carbamidomethylation; ethanolamine (DE); ethanolamine (DE); more	Q8WXX5	2031.04	16
1220	G(+45.03)LLSD(+43.04)PVR	-	M	GLLSDPVR	R	acetyl-d3 (protein N-term); ethanolamine (DE)	O43292	943.553	8
1221	G(+45.03)LLTILK(+45.03)K(+45.03)M	-	M	GLLTILKKM	K	acetyl-d3 (protein N-term); acetyl-d3 (K); acetyl-d3 (K)	P36404	1150.73	9
1222	G(+45.03)LLTILK(+45.03)K(+45.03)M(+15.99)K(+45.03)	-	M	GLLTILKKMK	Q	acetyl-d3 (protein N-term); acetyl-d3 (K); acetyl-d3 (K); Oxidation (M); acetyl-d3 (K)	P36404	1339.85	10
1223	G(+45.03)LLTILK(+45.03)K(+45.03)M(+15.99)K(+45.03)QK(+45.03)	-	M	GLLTILKKMKQK	E	acetyl-d3 (protein N-term); acetyl-d3 (K); acetyl-d3 (K); Oxidation (M); acetyl-d3 (K); more	P36404	1641.04	12
1224	G(+45.03)LLTILK(+45.03)K(+45.03)M(+15.99)K(+45.03)QK(+45.03)E	-	M	GLLTILKKMKQKE	R	acetyl-d3 (protein N-term); acetyl-d3 (K); acetyl-d3 (K); Oxidation (M); acetyl-d3 (K); more	P36404	1770.08	13
1225	G(+45.03)LLTILK(+45.03)K(+45.03)M(+15.99)K(+45.03)QK(+45.03)E(+43.04)	-	M	GLLTILKKMKQKE	R	acetyl-d3 (protein N-term); acetyl-d3 (K); acetyl-d3 (K); Oxidation (M); acetyl-d3 (K); more	P36404	1813.12	13
1226	G(+45.03)LLTILK(+45.03)K(+45.03)MK(+45.03)	-	M	GLLTILKKMK	Q	acetyl-d3 (protein N-term); acetyl-d3 (K); acetyl-d3 (K); acetyl-d3 (K)	P36404	1323.86	10
1227	G(+45.03)LLTILK(+45.03)K(+45.03)MK(+45.03)QK(+45.03)	-	M	GLLTILKKMKQK	E	acetyl-d3 (protein N-term); acetyl-d3 (K); acetyl-d3 (K); acetyl-d3 (K); acetyl-d3 (K)	P36404	1625.04	12
1228	G(+45.03)LLTILK(+45.03)K(+45.03)MK(+45.03)QK(+45.03)E	-	M	GLLTILKKMKQKE	R	acetyl-d3 (protein N-term); acetyl-d3 (K); acetyl-d3 (K); acetyl-d3 (K); acetyl-d3 (K)	P36404	1754.08	13
1229	G(+45.03)LLTILK(+45.03)K(+45.03)MK(+45.03)QK(+45.03)E(+43.04)	-	M	GLLTILKKMKQKE	R	acetyl-d3 (protein N-term); acetyl-d3 (K); acetyl-d3 (K); acetyl-d3 (K); acetyl-d3 (K); more	P36404	1797.13	13
1230	G(+45.03)LYAAAAGVLAGVE(+43.04)S	-	M	GLYAAAAGVLAGVES	R	acetyl-d3 (protein N-term); ethanolamine (DE)	Q96P11	1435.78	15
1231	G(+45.03)LYAAAAGVLAGVES(+43.04)	-	M	GLYAAAAGVLAGVES	R	acetyl-d3 (protein N-term); ethanolamine (C-term)	Q96P11	1435.78	15
1232	G(+45.03)PAPAGE(+43.04)QL	-	M	GPAPAGEQL	R	acetyl-d3 (protein N-term); ethanolamine (DE)	Q9H6R4	926.49	9
1233	G(+45.03)QND(+43.04)LM(+15.99)GTAE(+43.04)D(+43.04)FAD(+43.04)QFL	-	M	GQNDLMGTAEDFADQFL	R	acetyl-d3 (protein N-term); ethanolamine (DE); Oxidation (M); ethanolamine (DE); ethanolamine (DE); more	O15260	2104	17
1234	G(+45.03)QTGK(+45.03)K(+45.03)SE(+43.04)K(+45.03)GPVC(+57.02)W	-	M	GQTGKKSEKGPVCW	R	acetyl-d3 (protein N-term); acetyl-d3 (K); acetyl-d3 (K); ethanolamine (DE); acetyl-d3 (K); more	Q15910	1783.93	14
1235	G(+45.03)RK(+45.03)DAATIK(+45.03)LPVD(+43.04)QY	-	M	GRKDAATIKLPVDQY	R	acetyl-d3 (protein N-term); acetyl-d3 (K); acetyl-d3 (K); ethanolamine (DE)	Q629K1	1852.04	15
1236	G(+45.03)RM(+15.99)HAPGK(+45.03)GLSQSALPY	-	M	GRMHAPGKGLSQSALPY	R	acetyl-d3 (protein N-term); Oxidation (M); acetyl-d3 (K)	P62277	1874.96	17
1237	G(+45.03)RMHAPGK(+45.03)GLSQSALPY	-	M	GRMHAPGKGLSQSALPY	R	acetyl-d3 (protein N-term); acetyl-d3 (K)	P62277	1858.96	17
1238	G(+45.03)RVIRGQ	-	M	GRVIRGQ	R	acetyl-d3 (protein N-term)	P62917	829.496	7
1239	G(+45.03)SQE(+43.04)VLGHAA	-	M	GSQEVLGHAA	R	acetyl-d3 (protein N-term); ethanolamine (DE)	Q96AA3	1055.54	10
1240	G(+45.03)VD(+43.04)IRHNK(+45.03)D(+43.04)	-	M	GVDIRHNKD	R	acetyl-d3 (protein N-term); ethanolamine (DE); acetyl-d3 (K); ethanolamine (DE)	Q07020	1228.68	9
1241	G(+45.03)VDIRHNK(+45.03)D(+43.04)	-	M	GVDIRHNKD	R	acetyl-d3 (protein N-term); acetyl-d3 (K); ethanolamine (DE)	Q07020	1185.64	9
1242	G(+45.03)VQGFQD(+43.04)YIE(+43.04)K(+45.03)HC(+57.02)PS	-	M	GVQGFQDYIEKHCPS	A	acetyl-d3 (protein N-term); ethanolamine (DE); ethanolamine (DE); acetyl-d3 (K); Carbamidomethylation	Q9NZB2	1939.94	15
1243	G(+45.03)VQGFQD(+43.04)YIE(+43.04)K(+45.03)HC(+57.02)PSAVVPVE(+43.04)LQK(+45.03)LA	-	M	GVQGFQDYIEKHCPSAVVPVELQKLA	R	acetyl-d3 (protein N-term); ethanolamine (DE); ethanolamine (DE); acetyl-d3 (K); Carbamidomethylation; more	Q9NZB2	3175.7	26
1244	G(+45.03)VQGFQE(+43.04)FLE(+43.04)K(+45.03)	-	M	GVQGFQEFLEK	R	acetyl-d3 (protein N-term); ethanolamine (DE); ethanolamine (DE); acetyl-d3 (K)	Q9NX05	1456.78	11
1245	G(+45.03)VQGLWK(+45.03)LLE(+43.04)C(+57.02)SG	-	M	GVQGLWKLLECSG	R	acetyl-d3 (protein N-term); acetyl-d3 (K); ethanolamine (DE); Carbamidomethylation	P28715	1578.83	13
1246	G(+45.03)VQVE(+43.04)TISPGD(+43.04)G	-	M	GVQVETISPGDG	R	acetyl-d3 (protein N-term); ethanolamine (DE); ethanolamine (DE)	P62942	1288.67	12
1247	G(+45.03)VQVE(+43.04)TISPGD(+43.04)GRTFPK(+45.03)	-	M	GVQVETISPGDGRTFPK	R	acetyl-d3 (protein N-term); ethanolamine (DE); ethanolamine (DE); acetyl-d3 (K)	P62942	1963.06	17
1248	G(+45.03)VQVE(+43.04)TISPGDG	-	M	GVQVETISPGDG	R	acetyl-d3 (protein N-term); ethanolamine (DE)	P62942	1245.63	12
1249	G(+45.03)VQVE(+43.04)TISPGDGRTFPK(+45.03)	-	M	GVQVETISPGDGRTFPK	R	acetyl-d3 (protein N-term); ethanolamine (DE); acetyl-d3 (K)	P62942	1920.02	17
1250	G(+45.03)VQVETISPGD(+43.04)G	-	M	GVQVETISPGDG	R	acetyl-d3 (protein N-term); ethanolamine (DE)	P62942	1245.63	12
1251	G(+45.03)VQVETISPGD(+43.04)GRTFPK(+45.03)	-	M	GVQVETISPGDGRTFPK	R	acetyl-d3 (protein N-term); ethanolamine (DE); acetyl-d3 (K)	P62942	1920.02	17
1252	G(+45.03)VQVETISPGDG(+43.04)	-	M	GVQVETISPGDG	R	acetyl-d3 (protein N-term); ethanolamine (C-term)	P62942	1245.63	12
1253	G(+45.03)VQVETISPGDGRTFPK(+45.03)	-	M	GVQVETISPGDGRTFPK	R	acetyl-d3 (protein N-term); acetyl-d3 (K)	P62942	1876.98	17
1254	GK(+45.03)GD(+43.04)PK(+45.03)K(+45.03)P	-，-	M，M	GKGDPKKP	R，R	acetyl-d3 (K); ethanolamine (DE); acetyl-d3 (K); acetyl-d3 (K)	B2RPK0，P09429	1003.6	8
1255	K(+45.03)(+45.03)VHGSLA	-	-	KVHGSLA	R	acetyl-d3 (K); acetyl-d3 (protein N-term)	P62861	800.466	7
1256	K(+45.03)FNPFVTSD(+43.04)RSK(+45.03)N	-，-	M，M	KFNPFVTSDRSKN	R，R	acetyl-d3 (K); ethanolamine (DE); acetyl-d3 (K)	P61254，Q9UNX3	1671.89	13
1257	K(+45.03)NK(+45.03)GAK(+45.03)QK(+45.03)LK(+45.03)	-	M	KNKGAKQKLK	R	acetyl-d3 (K); acetyl-d3 (K); acetyl-d3 (K); acetyl-d3 (K); acetyl-d3 (K)	Q2M1Z3	1366.88	10
1258	K(+45.03)PILLQGHE(+43.04)	-	M	KPILLQGHE	R	acetyl-d3 (K); ethanolamine (DE)	Q13347	1121.66	9
1259	K(+45.03)VHGSLA	-	-	KVHGSLA	R	acetyl-d3 (K)	P62861	755.437	7
1260	L(+27.99)PAATASLL	-	M	LPAATASLL	G	Formylation (Protein N-term)	Q15113	883.501	9
1261	M(+15.99)(+45.03)AAAIASSLI	-，-	-，-	MAAAIASSLI	R，R	Oxidation (M); acetyl-d3 (protein N-term)	Q92913，P61328	1007.54	10
1262	M(+15.99)(+45.03)AAERQE(+43.04)AL	-	-	MAAERQEAL	R	Oxidation (M); acetyl-d3 (protein N-term); ethanolamine (DE)	Q9UNZ2	1121.56	9
1263	M(+15.99)(+45.03)AAVAGSGAAAAPS	-	-	MAAVAGSGAAAAPS	S	Oxidation (M); acetyl-d3 (protein N-term)	Q66K74	1191.56	14
1264	M(+15.99)(+45.03)AAVLQQVLE(+43.04)RT	-	-	MAAVLQQVLERT	E	Oxidation (M); acetyl-d3 (protein N-term); ethanolamine (DE)	P12270	1461.81	12
1265	M(+15.99)(+45.03)AK(+45.03)IK(+45.03)ARDLRGK(+45.03)K(+45.03)	-	-	MAKIKARDLRGKK	K	Oxidation (M); acetyl-d3 (protein N-term); acetyl-d3 (K); acetyl-d3 (K); acetyl-d3 (K); more	P42766	1755.07	13
1266	M(+15.99)(+45.03)ALTQGPLTF(+43.04)	-	-	MALTQGPLTF	R	Oxidation (M); acetyl-d3 (protein N-term); ethanolamine (C-term)	Q6ZNA1	1181.62	10
1267	M(+15.99)(+45.03)APE(+43.04)VLPK(+45.03)P	-	-	MAPEVLPKP	R	Oxidation (M); acetyl-d3 (protein N-term); ethanolamine (DE); acetyl-d3 (K)	P09669	1129.63	9
1268	M(+15.99)(+45.03)APE(+43.04)VLPK(+45.03)PRM	-	-	MAPEVLPKPRM	R	Oxidation (M); acetyl-d3 (protein N-term); ethanolamine (DE); acetyl-d3 (K)	P09669	1416.77	11
1269	M(+15.99)(+45.03)APE(+43.04)VLPK(+45.03)PRM(+15.99)	-	-	MAPEVLPKPRM	R	Oxidation (M); acetyl-d3 (protein N-term); ethanolamine (DE); acetyl-d3 (K); Oxidation (M)	P09669	1432.77	11
1270	M(+15.99)(+45.03)AQAK(+45.03)INAK(+45.03)ANE(+43.04)G	-	-	MAQAKINAKANEG	R	Oxidation (M); acetyl-d3 (protein N-term); acetyl-d3 (K); acetyl-d3 (K); ethanolamine (DE)	O95816	1538.81	13
1271	M(+15.99)(+45.03)ATGDLK(+45.03)	-	-	MATGDLK	R	Oxidation (M); acetyl-d3 (protein N-term); acetyl-d3 (K)	Q9C0F1	840.417	7
1272	M(+15.99)(+45.03)ATPAGLE	-	-	MATPAGLE	R	Oxidation (M); acetyl-d3 (protein N-term)	O60231	849.398	8
1273	M(+15.99)(+45.03)AVLAALLRSGARS	-	-	MAVLAALLRSGARS	R	Oxidation (M); acetyl-d3 (protein N-term)	P24752	1475.83	14
1274	M(+15.99)(+45.03)D(+43.04)PK(+45.03)YQRVELND(+43.04)GHFMPVLGFGTYAPPE(+43.04)VP	-	-	MDPKYQRVELNDGHFMPVLGFGTYAPPEVP	R	Oxidation (M); acetyl-d3 (protein N-term); ethanolamine (DE); acetyl-d3 (K); ethanolamine (DE); more	P17516	3638.82	30
1275	M(+15.99)(+45.03)DGTTAPVTK(+45.03)SG	-	-	MDGTTAPVTKSG	A	Oxidation (M); acetyl-d3 (protein N-term); acetyl-d3 (K)	Q9Y574	1269.6	12
1276	M(+15.99)(+45.03)DPK(+45.03)YQRVE(+43.04)LND(+43.04)GHFMPVLGFGTYAPPE(+43.04)VP	-	-	MDPKYQRVELNDGHFMPVLGFGTYAPPEVP	R	Oxidation (M); acetyl-d3 (protein N-term); acetyl-d3 (K); ethanolamine (DE); ethanolamine (DE); more	P17516	3638.82	30
1277	M(+15.99)(+45.03)EEVVIAGMS	-	-	MEEVVIAGMS	G	Oxidation (M); acetyl-d3 (protein N-term)	P49327	1125.51	10
1278	M(+15.99)(+45.03)FGFHK(+45.03)PK(+45.03)M(+15.99)Y	-	-	MFGFHKPKMY	R	Oxidation (M); acetyl-d3 (protein N-term); acetyl-d3 (K); acetyl-d3 (K); Oxidation (M)	Q9NP50	1451.69	10
1279	M(+15.99)(+45.03)FLQYYLNE(+43.04)QGD(+43.04)	-	-	MFLQYYLNEQGD	R	Oxidation (M); acetyl-d3 (protein N-term); ethanolamine (DE); ethanolamine (DE)	Q9NPE3	1666.77	12
1280	M(+15.99)(+45.03)GGRGADAGSSGG	-	-	MGGRGADAGSSGG	T	Oxidation (M); acetyl-d3 (protein N-term)	Q969W3	1139.47	13
1281	M(+15.99)(+45.03)GK(+45.03)VGAGGGSQA	-	-	MGKVGAGGGSQA	R	Oxidation (M); acetyl-d3 (protein N-term); acetyl-d3 (K)	Q8WY21	1124.54	12
1282	M(+15.99)(+45.03)GPPGPALPATM(+43.04)	-	-	MGPPGPALPATM	N	Oxidation (M); acetyl-d3 (protein N-term); ethanolamine (C-term)	Q15003	1242.62	12
1283	M(+15.99)(+45.03)HGGGPPSGD(+43.04)SAC(+57.02)PL	-	-	MHGGGPPSGDSACPL	R	Oxidation (M); acetyl-d3 (protein N-term); ethanolamine (DE); Carbamidomethylation	P24928	1542.66	15
1284	M(+15.99)(+45.03)IE(+43.04)VVC(+57.02)ND(+43.04)	-	-	MIEVVCND	R	Oxidation (M); acetyl-d3 (protein N-term); ethanolamine (DE); Carbamidomethylation; ethanolamine (DE)	Q9BZL1	1125.52	8
1285	M(+15.99)(+45.03)IE(+43.04)VVC(+57.02)ND(+43.04)RLGK(+45.03)K(+45.03)V	-	-	MIEVVCNDRLGKKV	R	Oxidation (M); acetyl-d3 (protein N-term); ethanolamine (DE); Carbamidomethylation; ethanolamine (DE); more	Q9BZL1	1897.05	14
1286	M(+15.99)(+45.03)IGGLFIYNHK(+45.03)G	-	-	MIGGLFIYNHKG	E	Oxidation (M); acetyl-d3 (protein N-term); acetyl-d3 (K)	Q96CW1	1454.75	12
1287	M(+15.99)(+45.03)ITK(+45.03)THK(+45.03)VD(+43.04)L	-	-	MITKTHKVDL	G	Oxidation (M); acetyl-d3 (protein N-term); acetyl-d3 (K); acetyl-d3 (K); ethanolamine (DE)	Q1ED39	1378.78	10
1288	M(+15.99)(+45.03)ITK(+45.03)THK(+45.03)VD(+43.04)LGLPE(+43.04)K(+45.03)K(+45.03)K(+45.03)K(+45.03)K(+45.03)K(+45.03)VVK(+45.03)E(+43.04)PE(+43.04)T	-	-	MITKTHKVDLGLPEKKKKKKVVKEPET	R	Oxidation (M); acetyl-d3 (protein N-term); acetyl-d3 (K); acetyl-d3 (K); ethanolamine (DE); more	Q1ED39	3770.3	27
1289	M(+15.99)(+45.03)ITK(+45.03)THK(+45.03)VDL(+43.04)	-	-	MITKTHKVDL	G	Oxidation (M); acetyl-d3 (protein N-term); acetyl-d3 (K); acetyl-d3 (K); ethanolamine (C-term)	Q1ED39	1378.78	10
1290	M(+15.99)(+45.03)ITSAAGIISLLD(+43.04)	-	-	MITSAAGIISLLD	E	Oxidation (M); acetyl-d3 (protein N-term); ethanolamine (DE)	Q99460	1407.77	13
1291	M(+15.99)(+45.03)ITSAAGIISLLD(+43.04)E(+43.04)D(+43.04)	-	-	MITSAAGIISLLDED	E	Oxidation (M); acetyl-d3 (protein N-term); ethanolamine (DE); ethanolamine (DE); ethanolamine (DE)	Q99460	1737.93	15
1292	M(+15.99)(+45.03)K(+45.03)ALILVGGYGT	-	-	MKALILVGGYGT	R	Oxidation (M); acetyl-d3 (protein N-term); acetyl-d3 (K)	Q9Y5P6	1327.73	12
1293	M(+15.99)(+45.03)K(+45.03)ASGTL	-，S	-，T	MKASGTL	R，P	Oxidation (M); acetyl-d3 (protein N-term); acetyl-d3 (K)	Q02543，Q9NRA8	812.422	7
1294	M(+15.99)(+45.03)K(+45.03)AVK(+45.03)SE(+43.04)	-	-	MKAVKSE	R	Oxidation (M); acetyl-d3 (protein N-term); acetyl-d3 (K); acetyl-d3 (K); ethanolamine (DE)	Q8TAD8	985.546	7
1295	M(+15.99)(+45.03)K(+45.03)C(+57.02)HYE(+43.04)ALGV	-	-	MKCHYEALGV	R	Oxidation (M); acetyl-d3 (protein N-term); acetyl-d3 (K); Carbamidomethylation; ethanolamine (DE)	Q5F1R6	1355.65	10
1296	M(+15.99)(+45.03)K(+45.03)D(+43.04)VPGFLQQSQ	-	-	MKDVPGFLQQSQ	N	Oxidation (M); acetyl-d3 (protein N-term); acetyl-d3 (K); ethanolamine (DE)	Q9UNM6	1525.77	12
1297	M(+15.99)(+45.03)K(+45.03)E(+43.04)E(+43.04)K(+45.03)E(+43.04)H	-	-	MKEEKEH	R	Oxidation (M); acetyl-d3 (protein N-term); acetyl-d3 (K); ethanolamine (DE); ethanolamine (DE); more	Q9BZI7	1209.64	7
1298	M(+15.99)(+45.03)K(+45.03)E(+43.04)E(+43.04)VK(+45.03)GIPV	-，-	-，-	MKEEVKGIPV	R，R	Oxidation (M); acetyl-d3 (protein N-term); acetyl-d3 (K); ethanolamine (DE); ethanolamine (DE); more	O95239，Q2VIQ3	1365.79	10
1299	M(+15.99)(+45.03)K(+45.03)E(+43.04)TPLSNC(+57.02)E(+43.04)	-	-	MKETPLSNCE	R	Oxidation (M); acetyl-d3 (protein N-term); acetyl-d3 (K); ethanolamine (DE); Carbamidomethylation; more	Q06265	1399.66	10
1300	M(+15.99)(+45.03)K(+45.03)FNPFVTSD	-，-	-，-	MKFNPFVTSD	R，R	Oxidation (M); acetyl-d3 (protein N-term); acetyl-d3 (K)	P61254，Q9UNX3	1290.61	10
1301	M(+15.99)(+45.03)K(+45.03)FNPFVTSD(+43.04)	-，-	-，-	MKFNPFVTSD	R，R	Oxidation (M); acetyl-d3 (protein N-term); acetyl-d3 (K); ethanolamine (DE)	P61254，Q9UNX3	1333.65	10
1302	M(+15.99)(+45.03)K(+45.03)FNPFVTSD(+43.04)R	-，-	-，-	MKFNPFVTSDR	S，S	Oxidation (M); acetyl-d3 (protein N-term); acetyl-d3 (K); ethanolamine (DE)	P61254，Q9UNX3	1489.75	11
1303	M(+15.99)(+45.03)K(+45.03)FNPFVTSD(+43.04)RS	-，-	-，-	MKFNPFVTSDRS	K，K	Oxidation (M); acetyl-d3 (protein N-term); acetyl-d3 (K); ethanolamine (DE)	P61254，Q9UNX3	1576.78	12
1304	M(+15.99)(+45.03)K(+45.03)FNPFVTSD(+43.04)RSK(+45.03)N	-，-	-，-	MKFNPFVTSDRSKN	R，R	Oxidation (M); acetyl-d3 (protein N-term); acetyl-d3 (K); ethanolamine (DE); acetyl-d3 (K)	P61254，Q9UNX3	1863.95	14
1305	M(+15.99)(+45.03)K(+45.03)FNPFVTSDR(+43.04)	-，-	-，-	MKFNPFVTSDR	S，S	Oxidation (M); acetyl-d3 (protein N-term); acetyl-d3 (K); ethanolamine (C-term)	P61254，Q9UNX3	1489.75	11
1306	M(+15.99)(+45.03)K(+45.03)FNPFVTSDRS(+43.04)	-，-	-，-	MKFNPFVTSDRS	K，K	Oxidation (M); acetyl-d3 (protein N-term); acetyl-d3 (K); ethanolamine (C-term)	P61254，Q9UNX3	1576.78	12
1307	M(+15.99)(+45.03)K(+45.03)FNPFVTSDRSK(+45.03)N	-，-	-，-	MKFNPFVTSDRSKN	R，R	Oxidation (M); acetyl-d3 (protein N-term); acetyl-d3 (K); acetyl-d3 (K)	P61254，Q9UNX3	1820.91	14
1308	M(+15.99)(+45.03)K(+45.03)FNPFVTSDRSK(+45.03)N(+43.04)	-，-	-，-	MKFNPFVTSDRSKN	R，R	Oxidation (M); acetyl-d3 (protein N-term); acetyl-d3 (K); acetyl-d3 (K); ethanolamine (C-term)	P61254，Q9UNX3	1863.95	14
1309	M(+15.99)(+45.03)K(+45.03)FQYK(+45.03)E(+43.04)D(+43.04)HPFE(+43.04)Y	-	-	MKFQYKEDHPFEY	R	Oxidation (M); acetyl-d3 (protein N-term); acetyl-d3 (K); acetyl-d3 (K); ethanolamine (DE); more	Q9H0R8	2041	13
1310	M(+15.99)(+45.03)K(+45.03)FQYK(+45.03)E(+43.04)D(+43.04)HPFEY(+43.04)	-	-	MKFQYKEDHPFEY	R	Oxidation (M); acetyl-d3 (protein N-term); acetyl-d3 (K); acetyl-d3 (K); ethanolamine (DE); more	Q9H0R8	2041	13
1311	M(+15.99)(+45.03)K(+45.03)FVYK(+45.03)E(+43.04)	-	-	MKFVYKE	E	Oxidation (M); acetyl-d3 (protein N-term); acetyl-d3 (K); acetyl-d3 (K); ethanolamine (DE)	O95166	1137.61	7
1312	M(+15.99)(+45.03)K(+45.03)FVYK(+45.03)E(+43.04)E(+43.04)HPF	-	-	MKFVYKEEHPF	E	Oxidation (M); acetyl-d3 (protein N-term); acetyl-d3 (K); acetyl-d3 (K); ethanolamine (DE); more	O95166	1690.87	11
1313	M(+15.99)(+45.03)K(+45.03)FVYK(+45.03)E(+43.04)E(+43.04)HPFE(+43.04)K(+45.03)	-	-	MKFVYKEEHPFEK	R	Oxidation (M); acetyl-d3 (protein N-term); acetyl-d3 (K); acetyl-d3 (K); ethanolamine (DE); more	O95166	2036.08	13
1314	M(+15.99)(+45.03)K(+45.03)FVYK(+45.03)E(+43.04)E(+43.04)HPFEK(+45.03)(+43.04)	-	-	MKFVYKEEHPFEK	R	Oxidation (M); acetyl-d3 (protein N-term); acetyl-d3 (K); acetyl-d3 (K); ethanolamine (DE); more	O95166	2036.08	13
1315	M(+15.99)(+45.03)K(+45.03)FVYK(+45.03)E(+43.04)EHPFE(+43.04)K(+45.03)	-	-	MKFVYKEEHPFEK	R	Oxidation (M); acetyl-d3 (protein N-term); acetyl-d3 (K); acetyl-d3 (K); ethanolamine (DE); more	O95166	1993.04	13
1316	M(+15.99)(+45.03)K(+45.03)FVYK(+45.03)EE(+43.04)HPFE(+43.04)K(+45.03)	-	-	MKFVYKEEHPFEK	R	Oxidation (M); acetyl-d3 (protein N-term); acetyl-d3 (K); acetyl-d3 (K); ethanolamine (DE); more	O95166	1993.04	13
1317	M(+15.99)(+45.03)K(+45.03)FVYK(+45.03)EE(+43.04)HPFEK(+45.03)(+43.04)	-	-	MKFVYKEEHPFEK	R	Oxidation (M); acetyl-d3 (protein N-term); acetyl-d3 (K); acetyl-d3 (K); ethanolamine (DE); more	O95166	1993.04	13
1318	M(+15.99)(+45.03)K(+45.03)GK(+45.03)E(+43.04)E(+43.04)K(+45.03)E(+43.04)GGA	-	-	MKGKEEKEGGA	R	Oxidation (M); acetyl-d3 (protein N-term); acetyl-d3 (K); acetyl-d3 (K); ethanolamine (DE); more	Q9UNE7	1487.8	11
1319	M(+15.99)(+45.03)K(+45.03)HYE(+43.04)VE(+43.04)	-	-	MKHYEVE	I	Oxidation (M); acetyl-d3 (protein N-term); acetyl-d3 (K); ethanolamine (DE); ethanolamine (DE)	Q9NZ01	1126.56	7
1320	M(+15.99)(+45.03)K(+45.03)HYE(+43.04)VE(+43.04)IL	-	-	MKHYEVEIL	D	Oxidation (M); acetyl-d3 (protein N-term); acetyl-d3 (K); ethanolamine (DE); ethanolamine (DE)	Q9NZ01	1352.73	9
1321	M(+15.99)(+45.03)K(+45.03)HYE(+43.04)VE(+43.04)ILD(+43.04)AK(+45.03)T	-	-	MKHYEVEILDAKT	R	Oxidation (M); acetyl-d3 (protein N-term); acetyl-d3 (K); ethanolamine (DE); ethanolamine (DE); more	Q9NZ01	1856.01	13
1322	M(+15.99)(+45.03)K(+45.03)HYE(+43.04)VE(+43.04)ILDAK(+45.03)T	-	-	MKHYEVEILDAKT	R	Oxidation (M); acetyl-d3 (protein N-term); acetyl-d3 (K); ethanolamine (DE); ethanolamine (DE); more	Q9NZ01	1812.96	13
1323	M(+15.99)(+45.03)K(+45.03)HYE(+43.04)VEILD(+43.04)AK(+45.03)T	-	-	MKHYEVEILDAKT	R	Oxidation (M); acetyl-d3 (protein N-term); acetyl-d3 (K); ethanolamine (DE); ethanolamine (DE); more	Q9NZ01	1812.96	13
1324	M(+15.99)(+45.03)K(+45.03)HYEVE(+43.04)ILD(+43.04)AK(+45.03)T	-	-	MKHYEVEILDAKT	R	Oxidation (M); acetyl-d3 (protein N-term); acetyl-d3 (K); ethanolamine (DE); ethanolamine (DE); more	Q9NZ01	1812.96	13
1325	M(+15.99)(+45.03)K(+45.03)IE(+43.04)E(+43.04)VK(+45.03)	-	-	MKIEEVK	S	Oxidation (M); acetyl-d3 (protein N-term); acetyl-d3 (K); ethanolamine (DE); ethanolamine (DE); more	Q9Y265	1112.65	7
1326	M(+15.99)(+45.03)K(+45.03)IE(+43.04)E(+43.04)VK(+45.03)STTK(+45.03)TQ	-	-	MKIEEVKSTTKTQ	R	Oxidation (M); acetyl-d3 (protein N-term); acetyl-d3 (K); ethanolamine (DE); ethanolamine (DE); more	Q9Y265	1804	13
1327	M(+15.99)(+45.03)K(+45.03)IE(+43.04)EVK(+45.03)STTK(+45.03)TQ	-	-	MKIEEVKSTTKTQ	R	Oxidation (M); acetyl-d3 (protein N-term); acetyl-d3 (K); ethanolamine (DE); acetyl-d3 (K); more	Q9Y265	1760.96	13
1328	M(+15.99)(+45.03)K(+45.03)IEE(+43.04)VK(+45.03)STTK(+45.03)TQ	-	-	MKIEEVKSTTKTQ	R	Oxidation (M); acetyl-d3 (protein N-term); acetyl-d3 (K); ethanolamine (DE); acetyl-d3 (K); more	Q9Y265	1760.96	13
1329	M(+15.99)(+45.03)K(+45.03)IFVGNVD(+43.04)GAD(+43.04)TTPE(+43.04)	-	-	MKIFVGNVDGADTTPE	E	Oxidation (M); acetyl-d3 (protein N-term); acetyl-d3 (K); ethanolamine (DE); ethanolamine (DE); more	Q96PK6	1927.98	16
1330	M(+15.99)(+45.03)K(+45.03)LK(+45.03)D(+43.04)TK(+45.03)S	-	-	MKLKDTKS	R	Oxidation (M); acetyl-d3 (protein N-term); acetyl-d3 (K); acetyl-d3 (K); ethanolamine (DE); more	Q9GZR7	1188.68	8
1331	M(+15.99)(+45.03)K(+45.03)LK(+45.03)E(+43.04)VD(+43.04)	-	-	MKLKEVD	R	Oxidation (M); acetyl-d3 (protein N-term); acetyl-d3 (K); acetyl-d3 (K); ethanolamine (DE); more	O94979	1098.63	7
1332	M(+15.99)(+45.03)K(+45.03)LK(+45.03)E(+43.04)VD(+43.04)RTAM(+15.99)Q	-	-	MKLKEVDRTAMQ	A	Oxidation (M); acetyl-d3 (protein N-term); acetyl-d3 (K); acetyl-d3 (K); ethanolamine (DE); more	O94979	1701.91	12
1333	M(+15.99)(+45.03)K(+45.03)LK(+45.03)ELE(+43.04)	-	-	MKLKELE	R	Oxidation (M); acetyl-d3 (protein N-term); acetyl-d3 (K); acetyl-d3 (K); ethanolamine (DE)	Q9NQW1	1083.62	7
1334	M(+15.99)(+45.03)K(+45.03)LK(+45.03)EVD(+43.04)	-	-	MKLKEVD	R	Oxidation (M); acetyl-d3 (protein N-term); acetyl-d3 (K); acetyl-d3 (K); ethanolamine (DE)	O94979	1055.59	7
1335	M(+15.99)(+45.03)K(+45.03)LLTHNL	-	-	MKLLTHNL	L	Oxidation (M); acetyl-d3 (protein N-term); acetyl-d3 (K)	Q9UI30	1074.6	8
1336	M(+15.99)(+45.03)K(+45.03)LLTHNLL	-	-	MKLLTHNLL	S	Oxidation (M); acetyl-d3 (protein N-term); acetyl-d3 (K)	Q9UI30	1187.69	9
1337	M(+15.99)(+45.03)K(+45.03)LLTHNLLS	-	-	MKLLTHNLLS	S	Oxidation (M); acetyl-d3 (protein N-term); acetyl-d3 (K)	Q9UI30	1274.72	10
1338	M(+15.99)(+45.03)K(+45.03)LLTHNLLSSHV	-	-	MKLLTHNLLSSHV	R	Oxidation (M); acetyl-d3 (protein N-term); acetyl-d3 (K)	Q9UI30	1597.88	13
1339	M(+15.99)(+45.03)K(+45.03)LNISFPATGC(+57.02)QK(+45.03)LI	-	-	MKLNISFPATGCQKLI	E	Oxidation (M); acetyl-d3 (protein N-term); acetyl-d3 (K); Carbamidomethylation; acetyl-d3 (K)	P62753	1971.05	16
1340	M(+15.99)(+45.03)K(+45.03)LNISFPATGC(+57.02)QK(+45.03)LIE(+43.04)VD(+43.04)D(+43.04)	-	-	MKLNISFPATGCQKLIEVDD	E	Oxidation (M); acetyl-d3 (protein N-term); acetyl-d3 (K); Carbamidomethylation; acetyl-d3 (K); more	P62753	2558.34	20
1341	M(+15.99)(+45.03)K(+45.03)LNISFPATGC(+57.02)QK(+45.03)LIE(+43.04)VD(+43.04)D(+43.04)E(+43.04)	-	-	MKLNISFPATGCQKLIEVDDE	R	Oxidation (M); acetyl-d3 (protein N-term); acetyl-d3 (K); Carbamidomethylation; acetyl-d3 (K); more	P62753	2730.43	21
1342	M(+15.99)(+45.03)K(+45.03)LNISFPATGC(+57.02)QK(+45.03)LIE(+43.04)VD(+43.04)DE(+43.04)(+43.04)	-	-	MKLNISFPATGCQKLIEVDDE	R	Oxidation (M); acetyl-d3 (protein N-term); acetyl-d3 (K); Carbamidomethylation; acetyl-d3 (K); more	P62753	2730.43	21
1343	M(+15.99)(+45.03)K(+45.03)LNISFPATGC(+57.02)QK(+45.03)LIE(+43.04)VDD(+43.04)(+43.04)	-	-	MKLNISFPATGCQKLIEVDD	E	Oxidation (M); acetyl-d3 (protein N-term); acetyl-d3 (K); Carbamidomethylation; acetyl-d3 (K); more	P62753	2558.34	20
1344	M(+15.99)(+45.03)K(+45.03)LNISFPATGC(+57.02)QK(+45.03)LIE(+43.04)VDD(+43.04)E(+43.04)(+43.04)	-	-	MKLNISFPATGCQKLIEVDDE	R	Oxidation (M); acetyl-d3 (protein N-term); acetyl-d3 (K); Carbamidomethylation; acetyl-d3 (K); more	P62753	2730.43	21
1345	M(+15.99)(+45.03)K(+45.03)LNISFPATGC(+57.02)QK(+45.03)LIE(+43.04)VDDE(+43.04)(+43.04)	-	-	MKLNISFPATGCQKLIEVDDE	R	Oxidation (M); acetyl-d3 (protein N-term); acetyl-d3 (K); Carbamidomethylation; acetyl-d3 (K); more	P62753	2687.39	21
1346	M(+15.99)(+45.03)K(+45.03)LNISFPATGC(+57.02)QK(+45.03)LIEVD(+43.04)D(+43.04)E(+43.04)(+43.04)	-	-	MKLNISFPATGCQKLIEVDDE	R	Oxidation (M); acetyl-d3 (protein N-term); acetyl-d3 (K); Carbamidomethylation; acetyl-d3 (K); more	P62753	2730.43	21
1347	M(+15.99)(+45.03)K(+45.03)M(+15.99)AD(+43.04)AK(+45.03)QK(+45.03)	-	-	MKMADAKQK	R	Oxidation (M); acetyl-d3 (protein N-term); acetyl-d3 (K); Oxidation (M); ethanolamine (DE); more	O14974	1304.69	9
1348	M(+15.99)(+45.03)K(+45.03)MAD(+43.04)AK(+45.03)QK(+45.03)	-	-	MKMADAKQK	R	Oxidation (M); acetyl-d3 (protein N-term); acetyl-d3 (K); ethanolamine (DE); acetyl-d3 (K); more	O14974	1288.69	9
1349	M(+15.99)(+45.03)K(+45.03)NQD(+43.04)K(+45.03)K(+45.03)NGAAK(+45.03)QSNPK(+45.03)SSPGQPE(+43.04)AGPE(+43.04)GAQE(+43.04)	-	-	MKNQDKKNGAAKQSNPKSSPGQPEAGPEGAQE	R	Oxidation (M); acetyl-d3 (protein N-term); acetyl-d3 (K); ethanolamine (DE); acetyl-d3 (K); more	P40222	3765.93	32
1350	M(+15.99)(+45.03)K(+45.03)NQD(+43.04)K(+45.03)K(+45.03)NGAAK(+45.03)QSNPK(+45.03)SSPGQPEAGPE(+43.04)GAQE(+43.04)	-	-	MKNQDKKNGAAKQSNPKSSPGQPEAGPEGAQE	R	Oxidation (M); acetyl-d3 (protein N-term); acetyl-d3 (K); ethanolamine (DE); acetyl-d3 (K); more	P40222	3722.88	32
1351	M(+15.99)(+45.03)K(+45.03)PILLQGH	-	-	MKPILLQGH	E	Oxidation (M); acetyl-d3 (protein N-term); acetyl-d3 (K)	Q13347	1141.64	9
1352	M(+15.99)(+45.03)K(+45.03)PILLQGHE	-	-	MKPILLQGHE	R	Oxidation (M); acetyl-d3 (protein N-term); acetyl-d3 (K)	Q13347	1270.69	10
1353	M(+15.99)(+45.03)K(+45.03)PILLQGHE(+43.04)	-	-	MKPILLQGHE	R	Oxidation (M); acetyl-d3 (protein N-term); acetyl-d3 (K); ethanolamine (DE)	Q13347	1313.73	10
1354	M(+15.99)(+45.03)K(+45.03)PLVVFVLGGPGAGK(+45.03)GTQC(+57.02)A	-	-	MKPLVVFVLGGPGAGKGTQCA	R	Oxidation (M); acetyl-d3 (protein N-term); acetyl-d3 (K); acetyl-d3 (K); Carbamidomethylation	P30085	2237.19	21
1355	M(+15.99)(+45.03)K(+45.03)PPAAC(+57.02)AGD(+43.04)M(+15.99)AD(+43.04)AASPC(+57.02)SVVNDL(+43.04)	-	-	MKPPAACAGDMADAASPCSVVNDL	R	Oxidation (M); acetyl-d3 (protein N-term); acetyl-d3 (K); Carbamidomethylation; ethanolamine (DE); more	P52888	2698.23	24
1356	M(+15.99)(+45.03)K(+45.03)PRPAGFVD(+43.04)NK(+45.03)LK(+45.03)Q	-	-	MKPRPAGFVDNKLKQ	R	Oxidation (M); acetyl-d3 (protein N-term); acetyl-d3 (K); ethanolamine (DE); acetyl-d3 (K); more	O15381	1967.11	15
1357	M(+15.99)(+45.03)K(+45.03)QLPVLE(+43.04)PGD(+43.04)K(+45.03)P	-	-	MKQLPVLEPGDKP	R	Oxidation (M); acetyl-d3 (protein N-term); acetyl-d3 (K); ethanolamine (DE); ethanolamine (DE); more	Q7Z6M1	1687.95	13
1358	M(+15.99)(+45.03)K(+45.03)RPK(+45.03)LK(+45.03)K(+45.03)ASK(+45.03)	-	-	MKRPKLKKASK	R	Oxidation (M); acetyl-d3 (protein N-term); acetyl-d3 (K); acetyl-d3 (K); acetyl-d3 (K); more	Q9BVP2	1600	11
1359	M(+15.99)(+45.03)K(+45.03)SAASSRGGGGGG(+43.04)	-	-	MKSAASSRGGGGGG	R	Oxidation (M); acetyl-d3 (protein N-term); acetyl-d3 (K); ethanolamine (C-term)	A6NHQ2	1327.64	14
1360	M(+15.99)(+45.03)K(+45.03)TILSNQTVD(+43.04)	-	-	MKTILSNQTVD	I	Oxidation (M); acetyl-d3 (protein N-term); acetyl-d3 (K); ethanolamine (DE)	P32969	1397.73	11
1361	M(+15.99)(+45.03)K(+45.03)TILSNQTVD(+43.04)IPE(+43.04)NVD(+43.04)ITLK(+45.03)G	-	-	MKTILSNQTVDIPENVDITLKG	R	Oxidation (M); acetyl-d3 (protein N-term); acetyl-d3 (K); ethanolamine (DE); ethanolamine (DE); more	P32969	2708.5	22
1362	M(+15.99)(+45.03)K(+45.03)TK(+45.03)PVSHK(+45.03)T	-	-	MKTKPVSHKT	E	Oxidation (M); acetyl-d3 (protein N-term); acetyl-d3 (K); acetyl-d3 (K); acetyl-d3 (K)	O75691	1351.76	10
1363	M(+15.99)(+45.03)K(+45.03)TK(+45.03)PVSHK(+45.03)TE(+43.04)NTY	-	-	MKTKPVSHKTENTY	R	Oxidation (M); acetyl-d3 (protein N-term); acetyl-d3 (K); acetyl-d3 (K); acetyl-d3 (K); more	O75691	1901.99	14
1364	M(+15.99)(+45.03)K(+45.03)TLE(+43.04)TQPLAPD(+43.04)C(+57.02)C(+57.02)PSD(+43.04)QD(+43.04)PAPAHPSPH	-	-	MKTLETQPLAPDCCPSDQDPAPAHPSPH	A	Oxidation (M); acetyl-d3 (protein N-term); acetyl-d3 (K); ethanolamine (DE); ethanolamine (DE); more	Q9BUR4	3374.6	28
1365	M(+15.99)(+45.03)K(+45.03)TPFGK(+45.03)TPGQ	-	-	MKTPFGKTPGQ	R	Oxidation (M); acetyl-d3 (protein N-term); acetyl-d3 (K); acetyl-d3 (K)	Q9Y657	1341.69	11
1366	M(+15.99)(+45.03)K(+45.03)VE(+43.04)LC(+57.02)SFS	-	-	MKVELCSFS	G	Oxidation (M); acetyl-d3 (protein N-term); acetyl-d3 (K); ethanolamine (DE); Carbamidomethylation	P83731	1248.6	9
1367	M(+15.99)(+45.03)K(+45.03)VE(+43.04)LC(+57.02)SFSGY	-	-	MKVELCSFSGY	K	Oxidation (M); acetyl-d3 (protein N-term); acetyl-d3 (K); ethanolamine (DE); Carbamidomethylation	P83731	1468.68	11
1368	M(+15.99)(+45.03)K(+45.03)VE(+43.04)LC(+57.02)SFSGYK(+45.03)IYPGHG	-	-	MKVELCSFSGYKIYPGHG	R	Oxidation (M); acetyl-d3 (protein N-term); acetyl-d3 (K); ethanolamine (DE); Carbamidomethylation; more	P83731	2266.11	18
1369	M(+15.99)(+45.03)K(+45.03)VE(+43.04)LC(+57.02)SFSGYK(+45.03)IYPGHGR	-	-	MKVELCSFSGYKIYPGHGR	R	Oxidation (M); acetyl-d3 (protein N-term); acetyl-d3 (K); ethanolamine (DE); Carbamidomethylation; more	P83731	2422.21	19
1370	M(+15.99)(+45.03)K(+45.03)VISLFI	-	-	MKVISLFI	L	Oxidation (M); acetyl-d3 (protein N-term); acetyl-d3 (K)	P10643	1055.62	8
1371	M(+15.99)(+45.03)K(+45.03)VK(+45.03)M(+15.99)LS	-	-	MKVKMLS	R	Oxidation (M); acetyl-d3 (protein N-term); acetyl-d3 (K); acetyl-d3 (K); Oxidation (M)	Q9NV06	1002.54	7
1372	M(+15.99)(+45.03)K(+45.03)VSTLRE(+43.04)SSAMASPLP	-	-	MKVSTLRESSAMASPLP	R	Oxidation (M); acetyl-d3 (protein N-term); acetyl-d3 (K); ethanolamine (DE)	Q9C0C2	1953.02	17
1373	M(+15.99)(+45.03)LIK(+45.03)VK(+45.03)TLTGK(+45.03)	-	-	MLIKVKTLTGK	E	Oxidation (M); acetyl-d3 (protein N-term); acetyl-d3 (K); acetyl-d3 (K); acetyl-d3 (K)	Q15843	1426.89	11
1374	M(+15.99)(+45.03)LIK(+45.03)VK(+45.03)TLTGK(+45.03)E(+43.04)I	-	-	MLIKVKTLTGKEI	E	Oxidation (M); acetyl-d3 (protein N-term); acetyl-d3 (K); acetyl-d3 (K); acetyl-d3 (K); more	Q15843	1712.05	13
1375	M(+15.99)(+45.03)LIK(+45.03)VK(+45.03)TLTGK(+45.03)E(+43.04)IE(+43.04)ID(+43.04)IE(+43.04)PTDK(+45.03)VE(+43.04)(+43.04)	-	-	MLIKVKTLTGKEIEIDIEPTDKVE	R	Oxidation (M); acetyl-d3 (protein N-term); acetyl-d3 (K); acetyl-d3 (K); acetyl-d3 (K); more	Q15843	3240.91	24
1376	M(+15.99)(+45.03)LIK(+45.03)VK(+45.03)TLTGK(+45.03)EI(+43.04)	-	-	MLIKVKTLTGKEI	E	Oxidation (M); acetyl-d3 (protein N-term); acetyl-d3 (K); acetyl-d3 (K); acetyl-d3 (K); more	Q15843	1712.05	13
1377	M(+15.99)(+45.03)LLGGPPRSP(+43.04)	-	-	MLLGGPPRSP	R	Oxidation (M); acetyl-d3 (protein N-term); ethanolamine (C-term)	Q13505	1127.62	10
1378	M(+15.99)(+45.03)LLK(+45.03)K(+45.03)HAGK(+45.03)GGG	-	-	MLLKKHAGKGGG	R	Oxidation (M); acetyl-d3 (protein N-term); acetyl-d3 (K); acetyl-d3 (K); acetyl-d3 (K)	Q9BXS0	1391.8	12
1379	M(+15.99)(+45.03)LLPNILLTGTPGVGK(+45.03)TTLGK(+45.03)E(+43.04)L	-	-	MLLPNILLTGTPGVGKTTLGKEL	A	Oxidation (M); acetyl-d3 (protein N-term); acetyl-d3 (K); acetyl-d3 (K); ethanolamine (DE)	Q9Y3D8	2559.49	23
1380	M(+15.99)(+45.03)LM(+15.99)PK(+45.03)K(+45.03)N	-，-	-，-	MLMPKKN	R，R	Oxidation (M); acetyl-d3 (protein N-term); Oxidation (M); acetyl-d3 (K); acetyl-d3 (K)	P46783，Q9NQ39	1027.54	7
1381	M(+15.99)(+45.03)LMPK(+45.03)K(+45.03)N	-，-	-，-	MLMPKKN	R，R	Oxidation (M); acetyl-d3 (protein N-term); acetyl-d3 (K); acetyl-d3 (K)	P46783，Q9NQ39	1011.54	7
1382	M(+15.99)(+45.03)LQSLAGSSC(+57.02)V	-	-	MLQSLAGSSCV	R	Oxidation (M); acetyl-d3 (protein N-term); Carbamidomethylation	O00180	1212.56	11
1383	M(+15.99)(+45.03)LRTEVP	-	-	MLRTEVP	R	Oxidation (M); acetyl-d3 (protein N-term)	Q7Z2G1	905.472	7
1384	M(+15.99)(+45.03)LSLD(+43.04)FLD(+43.04)D(+43.04)V	-	-	MLSLDFLDDV	R	Oxidation (M); acetyl-d3 (protein N-term); ethanolamine (DE); ethanolamine (DE); ethanolamine (DE)	P67812	1356.7	10
1385	M(+15.99)(+45.03)LSLD(+43.04)FLD(+43.04)D(+43.04)VR	-	-	MLSLDFLDDVR	R	Oxidation (M); acetyl-d3 (protein N-term); ethanolamine (DE); ethanolamine (DE); ethanolamine (DE)	P67812	1512.8	11
1386	M(+15.99)(+45.03)LSLD(+43.04)FLD(+43.04)DV(+43.04)	-	-	MLSLDFLDDV	R	Oxidation (M); acetyl-d3 (protein N-term); ethanolamine (DE); ethanolamine (DE); ethanolamine (C-term)	P67812	1356.7	10
1387	M(+15.99)(+45.03)LSLD(+43.04)FLDDVR(+43.04)	-	-	MLSLDFLDDVR	R	Oxidation (M); acetyl-d3 (protein N-term); ethanolamine (DE); ethanolamine (C-term)	P67812	1469.76	11
1388	M(+15.99)(+45.03)LTK(+45.03)FE(+43.04)TK(+45.03)SA	-	-	MLTKFETKSA	R	Oxidation (M); acetyl-d3 (protein N-term); acetyl-d3 (K); ethanolamine (DE); acetyl-d3 (K)	P53621	1348.73	10
1389	M(+15.99)(+45.03)LVLVLGD(+43.04)LHIPH	-	-	MLVLVLGDLHIPH	R	Oxidation (M); acetyl-d3 (protein N-term); ethanolamine (DE)	Q9UBQ0	1559.89	13
1390	M(+15.99)(+45.03)LWFQGAIPAAIATAK(+45.03)	-	-	MLWFQGAIPAAIATAK	R	Oxidation (M); acetyl-d3 (protein N-term); acetyl-d3 (K)	Q92575	1793.97	16
1391	M(+15.99)(+45.03)PGVTVK(+45.03)D(+43.04)VNQQE(+43.04)FV	-	-	MPGVTVKDVNQQEFV	R	Oxidation (M); acetyl-d3 (protein N-term); acetyl-d3 (K); ethanolamine (DE); ethanolamine (DE)	P39019	1881.98	15
1392	M(+15.99)(+45.03)PK(+45.03)C(+57.02)PK(+45.03)C(+57.02)NK(+45.03)E(+43.04)VYFAE(+43.04)	-	-	MPKCPKCNKEVYFAE	R	Oxidation (M); acetyl-d3 (protein N-term); acetyl-d3 (K); Carbamidomethylation; acetyl-d3 (K); more	P50238	2182.06	15
1393	M(+15.99)(+45.03)PMFIVNTNVP	-	-	MPMFIVNTNVP	R	Oxidation (M); acetyl-d3 (protein N-term)	P14174	1322.64	11
1394	M(+15.99)(+45.03)PPYTVVYFPV	-	-	MPPYTVVYFPV	R	Oxidation (M); acetyl-d3 (protein N-term)	P09211	1372.68	11
1395	M(+15.99)(+45.03)PPYTVVYFPVRG	-	-	MPPYTVVYFPVRG	R	Oxidation (M); acetyl-d3 (protein N-term)	P09211	1585.8	13
1396	M(+15.99)(+45.03)PTPLLPLLL	-	-	MPTPLLPLLL	R	Oxidation (M); acetyl-d3 (protein N-term)	A0A1B0GTQ4	1167.7	10
1397	M(+15.99)(+45.03)PVPPPPPP	-	-	MPVPPPPPP	P	Oxidation (M); acetyl-d3 (protein N-term)	A6NGB9	988.513	9
1398	M(+15.99)(+45.03)PVPPPPPP(+43.04)	-	-	MPVPPPPPP	P	Oxidation (M); acetyl-d3 (protein N-term); ethanolamine (C-term)	A6NGB9	1031.56	9
1399	M(+15.99)(+45.03)QIFVK(+45.03)TL	-，-，-，G，G，G，G，G，G，G，G，-，G，G	-，-，-，G，G，G，G，G，G，G，G，-，G，G	MQIFVKTL	T，T，T，T，T，T，T，T，T，T，T，T，T，T	Oxidation (M); acetyl-d3 (protein N-term); acetyl-d3 (K)	P62987，P62979，P0CG48，P0CG48，P0CG48，P0CG48，P0CG48，P0CG48，P0CG48，P0CG48，P0CG48，P0CG47，P0CG47，P0CG47	1084.61	8
1400	M(+15.99)(+45.03)QIFVK(+45.03)TLTGK(+45.03)	-，-，-，G，G，G，G，G，G，G，G，-，G，G	-，-，-，G，G，G，G，G，G，G，G，-，G，G	MQIFVKTLTGK	T，T，T，T，T，T，T，T，T，T，T，T，T，T	Oxidation (M); acetyl-d3 (protein N-term); acetyl-d3 (K); acetyl-d3 (K)	P62987，P62979，P0CG48，P0CG48，P0CG48，P0CG48，P0CG48，P0CG48，P0CG48，P0CG48，P0CG48，P0CG47，P0CG47，P0CG47	1415.8	11
1401	M(+15.99)(+45.03)QIFVK(+45.03)TLTGK(+45.03)TI	-，-，-，G，G，G，G，G，G，G，G，-，G，G	-，-，-，G，G，G，G，G，G，G，G，-，G，G	MQIFVKTLTGKTI	T，T，T，T，T，T，T，T，T，T，T，T，T，T	Oxidation (M); acetyl-d3 (protein N-term); acetyl-d3 (K); acetyl-d3 (K)	P62987，P62979，P0CG48，P0CG48，P0CG48，P0CG48，P0CG48，P0CG48，P0CG48，P0CG48，P0CG48，P0CG47，P0CG47，P0CG47	1629.94	13
1402	M(+15.99)(+45.03)QIFVK(+45.03)TLTGK(+45.03)TIT	-，-，-，G，G，G，G，G，G，G，G，-，G，G	-，-，-，G，G，G，G，G，G，G，G，-，G，G	MQIFVKTLTGKTIT	L，L，L，L，L，L，L，L，L，L，L，L，L，L	Oxidation (M); acetyl-d3 (protein N-term); acetyl-d3 (K); acetyl-d3 (K)	P62987，P62979，P0CG48，P0CG48，P0CG48，P0CG48，P0CG48，P0CG48，P0CG48，P0CG48，P0CG48，P0CG47，P0CG47，P0CG47	1730.98	14
1403	M(+15.99)(+45.03)QIFVK(+45.03)TLTGK(+45.03)TITL	-，-，-，G，G，G，G，G，G，G，G，-，G，G	-，-，-，G，G，G，G，G，G，G，G，-，G，G	MQIFVKTLTGKTITL	E，E，E，E，E，E，E，E，E，E，E，E，E，E	Oxidation (M); acetyl-d3 (protein N-term); acetyl-d3 (K); acetyl-d3 (K)	P62987，P62979，P0CG48，P0CG48，P0CG48，P0CG48，P0CG48，P0CG48，P0CG48，P0CG48，P0CG48，P0CG47，P0CG47，P0CG47	1844.07	15
1404	M(+15.99)(+45.03)QIFVK(+45.03)TLTGK(+45.03)TITL(+43.04)	-，-，-，G，G，G，G，G，G，G，G，-，G，G	-，-，-，G，G，G，G，G，G，G，G，-，G，G	MQIFVKTLTGKTITL	E，E，E，E，E，E，E，E，E，E，E，E，E，E	Oxidation (M); acetyl-d3 (protein N-term); acetyl-d3 (K); acetyl-d3 (K); ethanolamine (C-term)	P62987，P62979，P0CG48，P0CG48，P0CG48，P0CG48，P0CG48，P0CG48，P0CG48，P0CG48，P0CG48，P0CG47，P0CG47，P0CG47	1887.11	15
1405	M(+15.99)(+45.03)QIFVK(+45.03)TLTGK(+45.03)TITLE(+43.04)VE(+43.04)PSD(+43.04)TI	-，-，-，G，G，G，G，G，G，G，G，-，G，G	-，-，-，G，G，G，G，G，G，G，G，-，G，G	MQIFVKTLTGKTITLEVEPSDTI	E，E，E，E，E，E，E，E，E，E，E，E，E，E	Oxidation (M); acetyl-d3 (protein N-term); acetyl-d3 (K); acetyl-d3 (K); ethanolamine (DE); more	P62987，P62979，P0CG48，P0CG48，P0CG48，P0CG48，P0CG48，P0CG48，P0CG48，P0CG48，P0CG48，P0CG47，P0CG47，P0CG47	2843.59	23
1406	M(+15.99)(+45.03)QIFVK(+45.03)TLTGK(+45.03)TITLE(+43.04)VE(+43.04)PSD(+43.04)TIE(+43.04)NVK(+45.03)	-，-，-，G，G，G，G，G，G，G，G，-，G，G	-，-，-，G，G，G，G，G，G，G，G，-，G，G	MQIFVKTLTGKTITLEVEPSDTIENVK	A，A，A，A，A，A，A，A，A，A，A，A，A，A	Oxidation (M); acetyl-d3 (protein N-term); acetyl-d3 (K); acetyl-d3 (K); ethanolamine (DE); more	P62987，P62979，P0CG48，P0CG48，P0CG48，P0CG48，P0CG48，P0CG48，P0CG48，P0CG48，P0CG48，P0CG47，P0CG47，P0CG47	3401.91	27
1407	M(+15.99)(+45.03)QLTVK(+45.03)ALQG	-	-	MQLTVKALQG	R	Oxidation (M); acetyl-d3 (protein N-term); acetyl-d3 (K)	P11441	1193.66	10
1408	M(+15.99)(+45.03)QPASAK(+45.03)WYD(+43.04)R	-	-	MQPASAKWYDR	R	Oxidation (M); acetyl-d3 (protein N-term); acetyl-d3 (K); ethanolamine (DE)	Q15185	1500.73	11
1409	M(+15.99)(+45.03)QPASAK(+45.03)WYDR	-	-	MQPASAKWYDR	R	Oxidation (M); acetyl-d3 (protein N-term); acetyl-d3 (K)	Q15185	1457.69	11
1410	M(+15.99)(+45.03)QPASAK(+45.03)WYDR(+43.04)	-	-	MQPASAKWYDR	R	Oxidation (M); acetyl-d3 (protein N-term); acetyl-d3 (K); ethanolamine (C-term)	Q15185	1500.73	11
1411	M(+15.99)(+45.03)SHAAEPARD	-	-	MSHAAEPARD	G	Oxidation (M); acetyl-d3 (protein N-term)	P19532	1144.5	10
1412	M(+15.99)(+45.03)SLSK(+45.03)K(+45.03)LTLD(+43.04)	-	-	MSLSKKLTLD	K	Oxidation (M); acetyl-d3 (protein N-term); acetyl-d3 (K); acetyl-d3 (K); ethanolamine (DE)	P07205	1328.76	10
1413	M(+15.99)(+45.03)SPPGSAAGES	-	-	MSPPGSAAGES	A	Oxidation (M); acetyl-d3 (protein N-term)	Q8IW70	1050.44	11
1414	M(+15.99)(+45.03)TK(+45.03)GTSSFGK(+45.03)	-	-	MTKGTSSFGK	R	Oxidation (M); acetyl-d3 (protein N-term); acetyl-d3 (K); acetyl-d3 (K)	P61927	1193.59	10
1415	M(+15.99)(+45.03)TNTK(+45.03)GK(+45.03)	-	-	MTNTKGK	R	Oxidation (M); acetyl-d3 (protein N-term); acetyl-d3 (K); acetyl-d3 (K)	P46778	929.484	7
1416	M(+15.99)(+45.03)TNTK(+45.03)GK(+45.03)R	-	-	MTNTKGKR	R	Oxidation (M); acetyl-d3 (protein N-term); acetyl-d3 (K); acetyl-d3 (K)	P46778	1085.59	8
1417	M(+15.99)(+45.03)TSAAPAK(+45.03)K(+45.03)PY(+155.14)RK(+45.03)APPEH	-	-	MTSAAPAKKPYRKAPPEH	R	Oxidation (M); acetyl-d3 (protein N-term); acetyl-d3 (K); acetyl-d3 (K); EDC(Y); more	Q5JTD0	2330.3	18
1418	M(+15.99)(+45.03)VD(+43.04)K(+45.03)K(+45.03)LVVVFGGTGAQGGSVA	-	-	MVDKKLVVVFGGTGAQGGSVA	R	Oxidation (M); acetyl-d3 (protein N-term); ethanolamine (DE); acetyl-d3 (K); acetyl-d3 (K)	Q9HBL8	2213.21	21
1419	M(+15.99)(+45.03)VD(+43.04)M(+15.99)M(+15.99)D(+43.04)LPRS	-	-	MVDMMDLPRS	R	Oxidation (M); acetyl-d3 (protein N-term); ethanolamine (DE); Oxidation (M); Oxidation (M); more	P35244	1372.62	10
1420	M(+15.99)(+45.03)VD(+43.04)RE(+43.04)QLVQK(+45.03)A	-	-	MVDREQLVQKA	R	Oxidation (M); acetyl-d3 (protein N-term); ethanolamine (DE); ethanolamine (DE); acetyl-d3 (K)	P61981	1507.83	11
1421	M(+15.99)(+45.03)VDRE(+43.04)QLVQK(+45.03)A	-	-	MVDREQLVQKA	R	Oxidation (M); acetyl-d3 (protein N-term); ethanolamine (DE); acetyl-d3 (K)	P61981	1464.79	11
1422	M(+15.99)(+45.03)VE(+43.04)E(+43.04)VQK(+45.03)HSVHTLVF	-	-	MVEEVQKHSVHTLVF	R	Oxidation (M); acetyl-d3 (protein N-term); ethanolamine (DE); ethanolamine (DE); acetyl-d3 (K)	O43660	1974.05	15
1423	M(+15.99)(+45.03)VK(+45.03)LDIHTLAHHLK(+45.03)QE	-	-	MVKLDIHTLAHHLKQE	R	Oxidation (M); acetyl-d3 (protein N-term); acetyl-d3 (K); acetyl-d3 (K)	Q14C86	2063.12	16
1424	M(+15.99)(+45.03)VK(+45.03)LSK(+45.03)E(+43.04)AK(+45.03)Q	-	-	MVKLSKEAKQ	R	Oxidation (M); acetyl-d3 (protein N-term); acetyl-d3 (K); acetyl-d3 (K); ethanolamine (DE); more	Q9P0U1	1399.81	10
1425	M(+15.99)(+45.03)VK(+45.03)LSK(+45.03)EAK(+45.03)Q	-	-	MVKLSKEAKQ	R	Oxidation (M); acetyl-d3 (protein N-term); acetyl-d3 (K); acetyl-d3 (K); acetyl-d3 (K)	Q9P0U1	1356.77	10
1426	M(+15.99)(+45.03)VLLE(+43.04)SE(+43.04)QFLTE(+43.04)LT	-	-	MVLLESEQFLTELT	R	Oxidation (M); acetyl-d3 (protein N-term); ethanolamine (DE); ethanolamine (DE); ethanolamine (DE)	P37108	1841.99	14
1427	M(+15.99)(+45.03)VLLK(+45.03)E(+43.04)Y	-	-	MVLLKEY	R	Oxidation (M); acetyl-d3 (protein N-term); acetyl-d3 (K); ethanolamine (DE)	Q00169	1043.58	7
1428	M(+15.99)(+45.03)VNFTVD(+43.04)QI	-	-	MVNFTVDQI	R	Oxidation (M); acetyl-d3 (protein N-term); ethanolamine (DE)	P13639	1169.58	9
1429	M(+15.99)(+45.03)VNVPK(+45.03)TR	-，-	-，-	MVNVPKTR	R，R	Oxidation (M); acetyl-d3 (protein N-term); acetyl-d3 (K)	P83881，Q969Q0	1049.58	8
1430	M(+15.99)(+45.03)VPPVQVSPLIK(+45.03)LG	-	-	MVPPVQVSPLIKLG	R	Oxidation (M); acetyl-d3 (protein N-term); acetyl-d3 (K)	P56385	1582.93	14
1431	M(+15.99)(+45.03)YIK(+45.03)QVIIQGF	-	-	MYIKQVIIQGF	R	Oxidation (M); acetyl-d3 (protein N-term); acetyl-d3 (K)	Q9UQE7	1444.79	11
1432	M(+15.99)AAAAAAAAAAGAAG(+43.04)	-	-	MAAAAAAAAAAGAAG	G	Oxidation (M); ethanolamine (C-term)	Q86U42	1174.58	15
1433	M(+15.99)AAAAAAAAAAGAAGG(+43.04)	-	-	MAAAAAAAAAAGAAGG	R	Oxidation (M); ethanolamine (C-term)	Q86U42	1231.6	16
1434	M(+15.99)AAAAVTGQRPETA	-	-	MAAAAVTGQRPETA	A	Oxidation (M)	Q9NXG6	1388.67	14
1435	M(+15.99)AALGEPV(+43.04)	-	-	MAALGEPV	R	Oxidation (M); ethanolamine (C-term)	Q9NUP9	845.432	8
1436	M(+15.99)AALK(+45.03)SWLS(+43.04)	-	-	MAALKSWLS	R	Oxidation (M); acetyl-d3 (K); ethanolamine (C-term)	Q9NR28	1109.6	9
1437	M(+15.99)AASAARGAAAL	-	-	MAASAARGAAAL	R	Oxidation (M)	Q9GZT3	1075.54	12
1438	M(+15.99)AASLVGK(+45.03)K(+45.03)IV	-	-	MAASLVGKKIV	F	Oxidation (M); acetyl-d3 (K); acetyl-d3 (K)	Q9BY32	1221.73	11
1439	M(+15.99)AAVPQNNLQE(+43.04)QLE	-	-	MAAVPQNNLQEQLE	R	Oxidation (M); ethanolamine (DE)	P54132	1642.8	14
1440	M(+15.99)AD(+43.04)VLSVL	-	-	MADVLSVL	R	Oxidation (M); ethanolamine (DE)	Q6P1J9	905.489	8
1441	M(+15.99)AESIIIRVQSPDGVK(+45.03)(+43.04)	-	-	MAESIIIRVQSPDGVK	R	Oxidation (M); acetyl-d3 (K); ethanolamine (C-term)	Q8TAT6	1846.01	16
1442	M(+15.99)AFK(+45.03)DTGK(+45.03)T	-	-	MAFKDTGKT	P	Oxidation (M); acetyl-d3 (K); acetyl-d3 (K)	P60866	1103.54	9
1443	M(+15.99)AGTVVLDDVE(+43.04)LREAQ	-	-	MAGTVVLDDVELREAQ	R	Oxidation (M); ethanolamine (DE)	P25205	1803.9	16
1444	M(+15.99)AHAAQVGLQD(+43.04)ATSPIM(+15.99)E(+43.04)	-	-	MAHAAQVGLQDATSPIME	E	Oxidation (M); ethanolamine (DE); Oxidation (M); ethanolamine (DE)	P00403	1986.95	18
1445	M(+15.99)ALLDVC(+57.02)GAP(+43.04)	-	-	MALLDVCGAP	R	Oxidation (M); Carbamidomethylation; ethanolamine (C-term)	P28062	1104.53	10
1446	M(+15.99)ASE(+43.04)VPYASGM(+15.99)PIK(+45.03)K(+45.03)IGH	-	-	MASEVPYASGMPIKKIGH	R	Oxidation (M); ethanolamine (DE); Oxidation (M); acetyl-d3 (K); acetyl-d3 (K)	A2A3N6	2080.06	18
1447	M(+15.99)ASGVAVSDGVIK(+45.03)VFND(+43.04)M(+15.99)K(+45.03)V	-	-	MASGVAVSDGVIKVFNDMKV	R	Oxidation (M); acetyl-d3 (K); ethanolamine (DE); Oxidation (M); acetyl-d3 (K)	P23528	2231.14	20
1448	M(+15.99)ASGVQVADEVC(+57.02)	-	-	MASGVQVADEVC	R	Oxidation (M); Carbamidomethylation	P60981	1280.54	12
1449	M(+15.99)ATATPVPPRMGSRAGGPTTPLSPT	-	-	MATATPVPPRMGSRAGGPTTPLSPT	R	Oxidation (M)	P20700	2466.24	25
1450	M(+15.99)ATLSLTVN	-	-	MATLSLTVN	S	Oxidation (M)	P07814	964.49	9
1451	M(+15.99)D(+43.04)LSGVK(+45.03)K(+45.03)K(+45.03)SL	-	-	MDLSGVKKKSL	L	Oxidation (M); ethanolamine (DE); acetyl-d3 (K); acetyl-d3 (K); acetyl-d3 (K)	Q15287	1398.81	11
1452	M(+15.99)D(+43.04)LY(+155.14)STPAAALDRFVAR	-	-	MDLYSTPAAALDRFVAR	R	Oxidation (M); ethanolamine (DE); EDC(Y)	Q9Y6K5	2110.14	17
1453	M(+15.99)E(+43.04)HNGSASNAD(+43.04)K(+45.03)IHQN	-	-	MEHNGSASNADKIHQN	R	Oxidation (M); ethanolamine (DE); ethanolamine (DE); acetyl-d3 (K)	Q5BKX8	1898.87	16
1454	M(+15.99)E(+43.04)HNGSASNAD(+43.04)K(+45.03)IHQN(+43.04)	-	-	MEHNGSASNADKIHQN	R	Oxidation (M); ethanolamine (DE); ethanolamine (DE); acetyl-d3 (K); ethanolamine (C-term)	Q5BKX8	1941.92	16
1455	M(+15.99)ERGPVVGAGLGAG	-	-	MERGPVVGAGLGAG	A	Oxidation (M)	A5D6W6	1285.64	14
1456	M(+15.99)GGPAAPRGAG	-	-	MGGPAAPRGAG	R	Oxidation (M)	Q13797	956.45	11
1457	M(+15.99)GK(+45.03)TANSPGSGA	-	-	MGKTANSPGSGA	R	Oxidation (M); acetyl-d3 (K)	Q13206	1137.52	12
1458	M(+15.99)GSC(+57.02)C(+57.02)SC(+57.02)PD(+43.04)K(+45.03)D(+43.04)TVPDNH(+43.04)	-	-	MGSCCSCPDKDTVPDNH	R	Oxidation (M); Carbamidomethylation; Carbamidomethylation; Carbamidomethylation; ethanolamine (DE); more	Q8WU20	2168.88	17
1459	M(+15.99)GTDSRAAK(+45.03)ALLA(+43.04)	-	-	MGTDSRAAKALLA	R	Oxidation (M); acetyl-d3 (K); ethanolamine (C-term)	P48507	1407.76	13
1460	M(+15.99)LLRDLVLR	-	-	MLLRDLVLR	R	Oxidation (M)	Q86XR5	1143.68	9
1461	M(+15.99)MLK(+45.03)GIT	-	-	MMLKGIT	R	Oxidation (M); acetyl-d3 (K)	P51398	853.448	7
1462	M(+15.99)PE(+43.04)E(+43.04)AGFPPAK(+45.03)RFRPGSGPPS(+43.04)	-	-	MPEEAGFPPAKRFRPGSGPPS	R	Oxidation (M); ethanolamine (DE); ethanolamine (DE); acetyl-d3 (K); ethanolamine (C-term)	Q9H6R0	2401.24	21
1463	M(+15.99)SE(+43.04)TAPAETATPAPVE(+43.04)K(+45.03)SPAK(+45.03)K(+45.03)K(+45.03)ATK(+45.03)K(+45.03)AAGAGAAK(+45.03)	-	-	MSETAPAETATPAPVEKSPAKKKATKKAAGAGAAK	R	Oxidation (M); ethanolamine (DE); ethanolamine (DE); acetyl-d3 (K); acetyl-d3 (K); more	P16401	3811.11	35
1464	M(+15.99)SETAPAE(+43.04)TATPAPVE(+43.04)K(+45.03)SPAK(+45.03)K(+45.03)K(+45.03)ATK(+45.03)K(+45.03)AAGAGAAK(+45.03)	-	-	MSETAPAETATPAPVEKSPAKKKATKKAAGAGAAK	R	Oxidation (M); ethanolamine (DE); ethanolamine (DE); acetyl-d3 (K); acetyl-d3 (K); more	P16401	3811.11	35
1465	M(+15.99)SGGSADYN	-	-	MSGGSADYN	R	Oxidation (M)	Q14240	916.323	9
1466	M(+15.99)SLLRSL	-	-	MSLLRSL	R	Oxidation (M)	P43897	834.463	7
1467	M(+15.99)SVAC(+57.02)VLK(+45.03)	-	-	MSVACVLK	R	Oxidation (M); Carbamidomethylation; acetyl-d3 (K)	Q14671	967.491	8
1468	M(+15.99)TELETAMGMIIDVFSR	-	-	MTELETAMGMIIDVFSR	Y	Oxidation (M)	P25815	1958.92	17
1469	M(+15.99)TTPGK(+45.03)E(+43.04)NF	-	-	MTTPGKENF	R	Oxidation (M); acetyl-d3 (K); ethanolamine (DE)	P52294	1127.54	9
1470	M(+15.99)TVSGPGTPEP	-	-	MTVSGPGTPEP	R	Oxidation (M)	Q9H3U1	1087.49	11
1471	M(+27.99)(+15.99)AAAQEADGARSAVVAAGGGSS	-	-	MAAAQEADGARSAVVAAGGGSS	G	Formylation (Protein N-term); Oxidation (M)	O96005	1976.89	22
1472	M(+27.99)(+15.99)AHAAQVGLQD(+43.04)	-	-	MAHAAQVGLQD	A	Formylation (Protein N-term); Oxidation (M); ethanolamine (DE)	P00403	1226.57	11
1473	M(+27.99)(+15.99)AHAAQVGLQD(+43.04)ATSPIM	-	-	MAHAAQVGLQDATSPIM	E	Formylation (Protein N-term); Oxidation (M); ethanolamine (DE)	P00403	1826.87	17
1474	M(+27.99)(+15.99)AHAAQVGLQD(+43.04)ATSPIM(+15.99)	-	-	MAHAAQVGLQDATSPIM	E	Formylation (Protein N-term); Oxidation (M); ethanolamine (DE); Oxidation (M)	P00403	1842.86	17
1475	M(+27.99)(+15.99)AHAAQVGLQD(+43.04)ATSPIM(+15.99)E(+43.04)	-	-	MAHAAQVGLQDATSPIME	E	Formylation (Protein N-term); Oxidation (M); ethanolamine (DE); Oxidation (M); ethanolamine (DE)	P00403	2014.95	18
1476	M(+27.99)(+15.99)AHAAQVGLQD(+43.04)ATSPIME(+43.04)	-	-	MAHAAQVGLQDATSPIME	E	Formylation (Protein N-term); Oxidation (M); ethanolamine (DE); ethanolamine (DE)	P00403	1998.95	18
1477	M(+27.99)(+15.99)K(+45.03)FNPFVTSD(+43.04)	-，-	-，-	MKFNPFVTSD	R，R	Formylation (Protein N-term); Oxidation (M); acetyl-d3 (K); ethanolamine (DE)	P61254，Q9UNX3	1316.62	10
1478	M(+27.99)(+15.99)K(+45.03)RSVAVW	-	-	MKRSVAVW	L	Formylation (Protein N-term); Oxidation (M); acetyl-d3 (K)	O43854	1064.55	8
1479	M(+27.99)(+15.99)LGPHLPPPPLAPSE(+43.04)G	-	-	MLGPHLPPPPLAPSEG	R	Formylation (Protein N-term); Oxidation (M); ethanolamine (DE)	Q8N3V7	1695.87	16
1480	M(+27.99)(+15.99)LLFLLSALVL	-	-	MLLFLLSALVL	L	Formylation (Protein N-term); Oxidation (M)	P35247	1275.75	11
1481	M(+27.99)(+15.99)MQGE(+43.04)AHPSASLID(+43.04)	-	-	MMQGEAHPSASLID	R	Formylation (Protein N-term); Oxidation (M); ethanolamine (DE); ethanolamine (DE)	Q96SK2	1615.73	14
1482	M(+27.99)(+15.99)PRK(+45.03)K(+45.03)AAA	-	-	MPRKKAAA	A	Formylation (Protein N-term); Oxidation (M); acetyl-d3 (K); acetyl-d3 (K)	Q9P258	1005.55	8
1483	M(+27.99)(+15.99)SDY(+155.14)STGGPPPGPPPPAGGGGGAGGA	-	-	MSDYSTGGPPPGPPPPAGGGGGAGGA	G	Formylation (Protein N-term); Oxidation (M); EDC(Y)	Q92945	2364.08	26
1484	M(+27.99)(+15.99)SNLSK(+45.03)GTGS	-	-	MSNLSKGTGS	R	Formylation (Protein N-term); Oxidation (M); acetyl-d3 (K)	Q13618	1069.48	10
1485	M(+27.99)(+15.99)TK(+45.03)GTSSFGK(+45.03)	-	-	MTKGTSSFGK	R	Formylation (Protein N-term); Oxidation (M); acetyl-d3 (K); acetyl-d3 (K)	P61927	1176.56	10
1486	M(+27.99)(+15.99)VNLAAMVW(+43.04)	-	-	MVNLAAMVW	R	Formylation (Protein N-term); Oxidation (M); ethanolamine (C-term)	Q9H741	1120.54	9
1487	M(+27.99)AAAAAAAVAGVG(+43.04)	-	-	MAAAAAAAVAGVG	R	Formylation (Protein N-term); ethanolamine (C-term)	Q9H3H3	1100.56	13
1488	M(+27.99)AAAAASRGVGAK(+45.03)LGL(+43.04)	-	-	MAAAAASRGVGAKLGL	R	Formylation (Protein N-term); acetyl-d3 (K); ethanolamine (C-term)	O43678	1558.87	16
1489	M(+27.99)AAAVAVAAASR(+43.04)	-	-	MAAAVAVAAASR	R	Formylation (Protein N-term); ethanolamine (C-term)	Q7Z5L9	1158.62	12
1490	M(+27.99)AALK(+45.03)LLSSGL	-	-	MAALKLLSSGL	R	Formylation (Protein N-term); acetyl-d3 (K)	P55809	1175.67	11
1491	M(+27.99)AAPEAWRA	-	-	MAAPEAWRA	R	Formylation (Protein N-term)	Q15345	1029.47	9
1492	M(+27.99)AASAAAASAAAASA	-	-	MAASAAAASAAAASA	A	Formylation (Protein N-term)	Q13263	1219.55	15
1493	M(+27.99)AGAGSAAVSGAGT	-	-	MAGAGSAAVSGAGT	P	Formylation (Protein N-term)	O95295	1134.5	14
1494	M(+27.99)AHAAQVGLQD(+43.04)ATSPIM	-	-	MAHAAQVGLQDATSPIM	E	Formylation (Protein N-term); ethanolamine (DE)	P00403	1810.87	17
1495	M(+27.99)AHAAQVGLQD(+43.04)ATSPIM(+15.99)	-	-	MAHAAQVGLQDATSPIM	E	Formylation (Protein N-term); ethanolamine (DE); Oxidation (M)	P00403	1826.87	17
1496	M(+27.99)AHAAQVGLQD(+43.04)ATSPIM(+15.99)E(+43.04)	-	-	MAHAAQVGLQDATSPIME	E	Formylation (Protein N-term); ethanolamine (DE); Oxidation (M); ethanolamine (DE)	P00403	1998.95	18
1497	M(+27.99)AHAAQVGLQD(+43.04)ATSPIME(+43.04)	-	-	MAHAAQVGLQDATSPIME	E	Formylation (Protein N-term); ethanolamine (DE); ethanolamine (DE)	P00403	1982.96	18
1498	M(+27.99)AQPGTLNLNN	-	-	MAQPGTLNLNN	E	Formylation (Protein N-term)	Q8NEF9	1199.56	11
1499	M(+27.99)ATAK(+45.03)GIAIGIDLG	-	-	MATAKGIAIGIDLG	T	Formylation (Protein N-term); acetyl-d3 (K)	P34931	1402.76	14
1500	M(+27.99)ATALMAVVL	-	-	MATALMAVVL	R	Formylation (Protein N-term)	Q8N159	1046.55	10
1501	M(+27.99)DLVGVASPEPG(+43.04)	-	-	MDLVGVASPEPG	T	Formylation (Protein N-term); ethanolamine (C-term)	O14730	1241.6	12
1502	M(+27.99)E(+43.04)PGPDGPAASGPA	-	-	MEPGPDGPAASGPA	A	Formylation (Protein N-term); ethanolamine (DE)	P19623	1323.58	14
1503	M(+27.99)EASWRQVAGGRGRS	-	-	MEASWRQVAGGRGRS	R	Formylation (Protein N-term)	Q6ZNB6	1674.8	15
1504	M(+27.99)EEEIAALVIDNGSGM(+15.99)C(+57.02)K(+45.03)AGFAGD(+43.04)D(+43.04)AP	-	-	MEEEIAALVIDNGSGMCKAGFAGDDAP	R	Formylation (Protein N-term); Oxidation (M); Carbamidomethylation; acetyl-d3 (K); ethanolamine (DE); more	P63261	2942.32	27
1505	M(+27.99)EEEIAALVIDNGSGMC(+57.02)K(+45.03)AGFAGD(+43.04)DAP(+43.04)	-	-	MEEEIAALVIDNGSGMCKAGFAGDDAP	R	Formylation (Protein N-term); Carbamidomethylation; acetyl-d3 (K); ethanolamine (DE); ethanolamine (C-term)	P63261	2926.32	27
1506	M(+27.99)EPVPLQDFV	-	-	MEPVPLQDFV	R	Formylation (Protein N-term)	Q5TEJ8	1201.57	10
1507	M(+27.99)ESRVAD(+43.04)AGTGETA	-	-	MESRVADAGTGETA	R	Formylation (Protein N-term); ethanolamine (DE)	Q7Z624	1464.65	14
1508	M(+27.99)GK(+45.03)AK(+45.03)VPASK(+45.03)	-	-	MGKAKVPASK	R	Formylation (Protein N-term); acetyl-d3 (K); acetyl-d3 (K); acetyl-d3 (K)	Q9GZR2	1178.67	10
1509	M(+27.99)GLLRGGLPC(+57.02)A	-	-	MGLLRGGLPCA	R	Formylation (Protein N-term); Carbamidomethylation	Q8NBI6	1171.58	11
1510	M(+27.99)GLPEPGPL	-	-	MGLPEPGPL	R	Formylation (Protein N-term)	Q14114	937.458	9
1511	M(+27.99)GPAARPALRSPPPPPPP	-	-	MGPAARPALRSPPPPPPP	P	Formylation (Protein N-term)	Q9Y6U7	1832.97	18
1512	M(+27.99)GPAARPALRSPPPPPPP(+43.04)	-	-	MGPAARPALRSPPPPPPP	P	Formylation (Protein N-term); ethanolamine (C-term)	Q9Y6U7	1876.01	18
1513	M(+27.99)GTALDIK(+45.03)IK(+45.03)	-	-	MGTALDIKIK	R	Formylation (Protein N-term); acetyl-d3 (K); acetyl-d3 (K)	O14972	1206.68	10
1514	M(+27.99)HGGGPPSGD(+43.04)SAC(+57.02)PL	-	-	MHGGGPPSGDSACPL	R	Formylation (Protein N-term); ethanolamine (DE); Carbamidomethylation	P24928	1509.63	15
1515	M(+27.99)HLLK(+45.03)VGTW	-	-	MHLLKVGTW	R	Formylation (Protein N-term); acetyl-d3 (K)	Q8WVZ7	1156.61	9
1516	M(+27.99)K(+45.03)VD(+43.04)RTK(+45.03)LK(+45.03)K(+45.03)TPTE(+43.04)APAD(+43.04)C(+57.02)	-	-	MKVDRTKLKKTPTEAPADC	R	Formylation (Protein N-term); acetyl-d3 (K); ethanolamine (DE); acetyl-d3 (K); acetyl-d3 (K); more	Q7Z6Z7	2525.37	19
1517	M(+27.99)LLWSLLVIFDAVT	-	-	MLLWSLLVIFDAVT	E	Formylation (Protein N-term)	Q96LA5	1647.89	14
1518	M(+27.99)MRLRGSGML	-	-	MMRLRGSGML	R	Formylation (Protein N-term)	O94925	1178.57	10
1519	M(+27.99)PDPAK(+45.03)SAPAPK(+45.03)K(+45.03)GSK(+45.03)K(+45.03)AVTK(+45.03)AQK(+45.03)K(+45.03)D(+43.04)GK(+45.03)K(+45.03)	-，-	-，-	MPDPAKSAPAPKKGSKKAVTKAQKKDGKK	R，R	Formylation (Protein N-term); acetyl-d3 (K); acetyl-d3 (K); acetyl-d3 (K); acetyl-d3 (K); more	Q93079，P23527	3541.06	29
1520	M(+27.99)PDRDSY(+155.14)ANGTGSSGGGPGGGGSE(+43.04)EASGAGVGSGGASSD(+43.04)A(+43.04)	-	-	MPDRDSYANGTGSSGGGPGGGGSEEASGAGVGSGGASSDA	I	Formylation (Protein N-term); EDC(Y); ethanolamine (DE); ethanolamine (DE); ethanolamine (C-term)	Q96K80	3741.65	40
1521	M(+27.99)PRK(+45.03)IE(+43.04)E(+43.04)IK(+45.03)	-	-	MPRKIEEIK	D	Formylation (Protein N-term); acetyl-d3 (K); ethanolamine (DE); ethanolamine (DE); acetyl-d3 (K)	P63173	1346.79	9
1522	M(+27.99)SAPAQPPAE(+43.04)GTEGTAPGGGPPG	-	-	MSAPAQPPAEGTEGTAPGGGPPG	P	Formylation (Protein N-term); ethanolamine (DE)	P23763	2103.95	23
1523	M(+27.99)SDRK(+45.03)AVIK(+45.03)NAD(+43.04)M(+15.99)SE(+43.04)	-	-	MSDRKAVIKNADMSE	D	Formylation (Protein N-term); acetyl-d3 (K); acetyl-d3 (K); ethanolamine (DE); Oxidation (M); more	Q96FJ2	1913.95	15
1524	M(+27.99)TK(+45.03)AGSK(+45.03)GGNL	-	-	MTKAGSKGGNL	R	Formylation (Protein N-term); acetyl-d3 (K); acetyl-d3 (K)	Q96AG4	1180.6	11
1525	M(+42.01)(+15.99)AAAAAAAAAAGA	-	-	MAAAAAAAAAAGA	A	Acetylation (Protein N-term); Oxidation (M)	Q86U42	1045.49	13
1526	M(+42.01)(+15.99)AAAVAAAGAGEPQSPD(+43.04)(+43.04)	-	-	MAAAVAAAGAGEPQSPD	E	Acetylation (Protein N-term); Oxidation (M); ethanolamine (C-term); ethanolamine (DE)	Q9NS69	1656.78	17
1527	M(+42.01)(+15.99)AALK(+45.03)ALVSGC(+57.02)G	-	-	MAALKALVSGCG	R	Acetylation (Protein N-term); Oxidation (M); acetyl-d3 (K); Carbamidomethylation	Q9NVS2	1279.63	12
1528	M(+42.01)(+15.99)AAVAGSGAAAAPS(+43.04)	-	-	MAAVAGSGAAAAPS	S	Acetylation (Protein N-term); Oxidation (M); ethanolamine (C-term)	Q66K74	1231.59	14
1529	M(+42.01)(+15.99)AAVAVAVREDSG	-	-	MAAVAVAVREDSG	S	Acetylation (Protein N-term); Oxidation (M)	Q9UI10	1332.63	13
1530	M(+42.01)(+15.99)AGLLALLGPAG	-	-	MAGLLALLGPAG	R	Acetylation (Protein N-term); Oxidation (M)	Q96KR6	1140.62	12
1531	M(+42.01)(+15.99)APAK(+45.03)K(+45.03)GGE(+43.04)K(+45.03)K(+45.03)K(+45.03)G	-	-	MAPAKKGGEKKKG	R	Acetylation (Protein N-term); Oxidation (M); acetyl-d3 (K); acetyl-d3 (K); ethanolamine (DE); more	P62899	1654.95	13
1532	M(+42.01)(+15.99)APD(+43.04)PVAAE(+43.04)TAAQGPTP	-	-	MAPDPVAAETAAQGPTP	R	Acetylation (Protein N-term); Oxidation (M); ethanolamine (DE); ethanolamine (DE)	O60427	1766.85	17
1533	M(+42.01)(+15.99)APE(+43.04)VLPK(+45.03)PRM(+15.99)	-	-	MAPEVLPKPRM	R	Acetylation (Protein N-term); Oxidation (M); ethanolamine (DE); acetyl-d3 (K); Oxidation (M)	P09669	1429.75	11
1534	M(+42.01)(+15.99)AVPGDAA(+43.04)	-	-	MAVPGDAA	R	Acetylation (Protein N-term); Oxidation (M); ethanolamine (C-term)	Q14432	831.38	8
1535	M(+42.01)(+15.99)AVQISK(+45.03)K(+45.03)	-	-	MAVQISKK	R	Acetylation (Protein N-term); Oxidation (M); acetyl-d3 (K); acetyl-d3 (K)	P23396	1051.59	8
1536	M(+42.01)(+15.99)AVQISK(+45.03)K(+45.03)(+43.04)	-	-	MAVQISKK	R	Acetylation (Protein N-term); Oxidation (M); acetyl-d3 (K); acetyl-d3 (K); ethanolamine (C-term)	P23396	1094.63	8
1537	M(+42.01)(+15.99)D(+43.04)AD(+43.04)D(+43.04)SRAPK(+45.03)GSL	-	-	MDADDSRAPKGSL	R	Acetylation (Protein N-term); Oxidation (M); ethanolamine (DE); ethanolamine (DE); ethanolamine (DE); more	Q01813	1593.79	13
1538	M(+42.01)(+15.99)D(+43.04)AD(+43.04)DSRAPK(+45.03)GSL	-	-	MDADDSRAPKGSL	R	Acetylation (Protein N-term); Oxidation (M); ethanolamine (DE); ethanolamine (DE); acetyl-d3 (K)	Q01813	1550.74	13
1539	M(+42.01)(+15.99)D(+43.04)ADD(+43.04)SRAPK(+45.03)GSL	-	-	MDADDSRAPKGSL	R	Acetylation (Protein N-term); Oxidation (M); ethanolamine (DE); ethanolamine (DE); acetyl-d3 (K)	Q01813	1550.74	13
1540	M(+42.01)(+15.99)D(+43.04)AFK(+45.03)GGM(+15.99)SLE(+43.04)	-	-	MDAFKGGMSLE	R	Acetylation (Protein N-term); Oxidation (M); ethanolamine (DE); acetyl-d3 (K); Oxidation (M); more	P78337	1389.63	11
1541	M(+42.01)(+15.99)D(+43.04)AIK(+45.03)K(+45.03)K(+45.03)	-，-	-，-	MDAIKKK	M，M	Acetylation (Protein N-term); Oxidation (M); ethanolamine (DE); acetyl-d3 (K); acetyl-d3 (K); more	P09493，P07951	1068.62	7
1542	M(+42.01)(+15.99)D(+43.04)AIK(+45.03)K(+45.03)K(+45.03)M	-，-	-，-	MDAIKKKM	Q，Q	Acetylation (Protein N-term); Oxidation (M); ethanolamine (DE); acetyl-d3 (K); acetyl-d3 (K); more	P09493，P07951	1199.66	8
1543	M(+42.01)(+15.99)D(+43.04)AIK(+45.03)K(+45.03)K(+45.03)M(+15.99)	-，-	-，-	MDAIKKKM	Q，Q	Acetylation (Protein N-term); Oxidation (M); ethanolamine (DE); acetyl-d3 (K); acetyl-d3 (K); more	P09493，P07951	1215.66	8
1544	M(+42.01)(+15.99)D(+43.04)AIK(+45.03)K(+45.03)K(+45.03)M(+15.99)Q	-，-	-，-	MDAIKKKMQ	M，M	Acetylation (Protein N-term); Oxidation (M); ethanolamine (DE); acetyl-d3 (K); acetyl-d3 (K); more	P09493，P07951	1343.71	9
1545	M(+42.01)(+15.99)D(+43.04)AIK(+45.03)K(+45.03)K(+45.03)M(+15.99)QM(+15.99)	-，-	-，-	MDAIKKKMQM	L，L	Acetylation (Protein N-term); Oxidation (M); ethanolamine (DE); acetyl-d3 (K); acetyl-d3 (K); more	P09493，P07951	1490.75	10
1546	M(+42.01)(+15.99)D(+43.04)AIK(+45.03)K(+45.03)K(+45.03)M(+15.99)QM(+15.99)LK(+45.03)LD(+43.04)K(+45.03)ENAID(+43.04)(+43.04)	-	-	MDAIKKKMQMLKLDKENAID	R	Acetylation (Protein N-term); Oxidation (M); ethanolamine (DE); acetyl-d3 (K); acetyl-d3 (K); more	P07951	2849.55	20
1547	M(+42.01)(+15.99)D(+43.04)AIK(+45.03)K(+45.03)K(+45.03)M(+15.99)QM(+15.99)LK(+45.03)LD(+43.04)K(+45.03)ENALD(+43.04)(+43.04)	-	-	MDAIKKKMQMLKLDKENALD	R	Acetylation (Protein N-term); Oxidation (M); ethanolamine (DE); acetyl-d3 (K); acetyl-d3 (K); more	P09493	2849.55	20
1548	M(+42.01)(+15.99)D(+43.04)AIK(+45.03)K(+45.03)K(+45.03)M(+15.99)QMLK(+45.03)LD(+43.04)K(+45.03)E(+43.04)NAID(+43.04)	-	-	MDAIKKKMQMLKLDKENAID	R	Acetylation (Protein N-term); Oxidation (M); ethanolamine (DE); acetyl-d3 (K); acetyl-d3 (K); more	P07951	2833.56	20
1549	M(+42.01)(+15.99)D(+43.04)AIK(+45.03)K(+45.03)K(+45.03)M(+15.99)QMLK(+45.03)LD(+43.04)K(+45.03)E(+43.04)NALD(+43.04)	-	-	MDAIKKKMQMLKLDKENALD	R	Acetylation (Protein N-term); Oxidation (M); ethanolamine (DE); acetyl-d3 (K); acetyl-d3 (K); more	P09493	2833.56	20
1550	M(+42.01)(+15.99)D(+43.04)AIK(+45.03)K(+45.03)K(+45.03)MQ	-，-	-，-	MDAIKKKMQ	M，M	Acetylation (Protein N-term); Oxidation (M); ethanolamine (DE); acetyl-d3 (K); acetyl-d3 (K); more	P09493，P07951	1327.72	9
1551	M(+42.01)(+15.99)D(+43.04)AIK(+45.03)K(+45.03)K(+45.03)MQM(+15.99)	-，-	-，-	MDAIKKKMQM	L，L	Acetylation (Protein N-term); Oxidation (M); ethanolamine (DE); acetyl-d3 (K); acetyl-d3 (K); more	P09493，P07951	1474.75	10
1552	M(+42.01)(+15.99)D(+43.04)AIK(+45.03)K(+45.03)K(+45.03)MQM(+15.99)LK(+45.03)LD(+43.04)K(+45.03)E(+43.04)NAID(+43.04)	-	-	MDAIKKKMQMLKLDKENAID	R	Acetylation (Protein N-term); Oxidation (M); ethanolamine (DE); acetyl-d3 (K); acetyl-d3 (K); more	P07951	2833.56	20
1553	M(+42.01)(+15.99)D(+43.04)AIK(+45.03)K(+45.03)K(+45.03)MQM(+15.99)LK(+45.03)LD(+43.04)K(+45.03)E(+43.04)NALD(+43.04)	-	-	MDAIKKKMQMLKLDKENALD	R	Acetylation (Protein N-term); Oxidation (M); ethanolamine (DE); acetyl-d3 (K); acetyl-d3 (K); more	P09493	2833.56	20
1554	M(+42.01)(+15.99)D(+43.04)AIK(+45.03)K(+45.03)K(+45.03)MQMLK(+45.03)LD(+43.04)K(+45.03)E(+43.04)NAID(+43.04)	-	-	MDAIKKKMQMLKLDKENAID	R	Acetylation (Protein N-term); Oxidation (M); ethanolamine (DE); acetyl-d3 (K); acetyl-d3 (K); more	P07951	2817.56	20
1555	M(+42.01)(+15.99)D(+43.04)AIK(+45.03)K(+45.03)K(+45.03)MQMLK(+45.03)LD(+43.04)K(+45.03)E(+43.04)NALD(+43.04)	-	-	MDAIKKKMQMLKLDKENALD	R	Acetylation (Protein N-term); Oxidation (M); ethanolamine (DE); acetyl-d3 (K); acetyl-d3 (K); more	P09493	2817.56	20
1556	M(+42.01)(+15.99)D(+43.04)ALQLANS	-	-	MDALQLANS	A	Acetylation (Protein N-term); Oxidation (M); ethanolamine (DE)	P36952	1062.5	9
1557	M(+42.01)(+15.99)D(+43.04)ALQLANSAF	-	-	MDALQLANSAF	A	Acetylation (Protein N-term); Oxidation (M); ethanolamine (DE)	P36952	1280.61	11
1558	M(+42.01)(+15.99)D(+43.04)AQC(+57.02)SAK(+45.03)VNA	-	-	MDAQCSAKVNA	R	Acetylation (Protein N-term); Oxidation (M); ethanolamine (DE); Carbamidomethylation; acetyl-d3 (K)	P49585	1339.59	11
1559	M(+42.01)(+15.99)D(+43.04)D(+43.04)IFTQC(+57.02)	-	-	MDDIFTQC	R	Acetylation (Protein N-term); Oxidation (M); ethanolamine (DE); ethanolamine (DE); Carbamidomethylation	Q13418	1172.48	8
1560	M(+42.01)(+15.99)D(+43.04)D(+43.04)K(+45.03)K(+45.03)K(+45.03)K(+45.03)	-	-	MDDKKKK	R	Acetylation (Protein N-term); Oxidation (M); ethanolamine (DE); ethanolamine (DE); acetyl-d3 (K); more	Q9BUN5	1215.69	7
1561	M(+42.01)(+15.99)D(+43.04)D(+43.04)RE(+43.04)D(+43.04)LVYQ	-	-	MDDREDLVYQ	A	Acetylation (Protein N-term); Oxidation (M); ethanolamine (DE); ethanolamine (DE); ethanolamine (DE); more	P62258	1512.72	10
1562	M(+42.01)(+15.99)D(+43.04)D(+43.04)RE(+43.04)D(+43.04)LVYQAK(+45.03)L	-	-	MDDREDLVYQAKL	A	Acetylation (Protein N-term); Oxidation (M); ethanolamine (DE); ethanolamine (DE); ethanolamine (DE); more	P62258	1869.97	13
1563	M(+42.01)(+15.99)D(+43.04)D(+43.04)RE(+43.04)D(+43.04)LVYQAK(+45.03)LAE(+43.04)QA	-	-	MDDREDLVYQAKLAEQA	E	Acetylation (Protein N-term); Oxidation (M); ethanolamine (DE); ethanolamine (DE); ethanolamine (DE); more	P62258	2312.19	17
1564	M(+42.01)(+15.99)D(+43.04)D(+43.04)RE(+43.04)D(+43.04)LVYQAK(+45.03)LAE(+43.04)QAE	-	-	MDDREDLVYQAKLAEQAE	R	Acetylation (Protein N-term); Oxidation (M); ethanolamine (DE); ethanolamine (DE); ethanolamine (DE); more	P62258	2441.23	18
1565	M(+42.01)(+15.99)D(+43.04)D(+43.04)RE(+43.04)D(+43.04)LVYQAK(+45.03)LAEQAE(+43.04)(+43.04)	-	-	MDDREDLVYQAKLAEQAE	R	Acetylation (Protein N-term); Oxidation (M); ethanolamine (DE); ethanolamine (DE); ethanolamine (DE); more	P62258	2484.27	18
1566	M(+42.01)(+15.99)D(+43.04)D(+43.04)RE(+43.04)DLVYQAK(+45.03)L	-	-	MDDREDLVYQAKL	A	Acetylation (Protein N-term); Oxidation (M); ethanolamine (DE); ethanolamine (DE); ethanolamine (DE); more	P62258	1826.93	13
1567	M(+42.01)(+15.99)D(+43.04)D(+43.04)RE(+43.04)DLVYQAK(+45.03)LA	-	-	MDDREDLVYQAKLA	E	Acetylation (Protein N-term); Oxidation (M); ethanolamine (DE); ethanolamine (DE); ethanolamine (DE); more	P62258	1897.96	14
1568	M(+42.01)(+15.99)D(+43.04)D(+43.04)RE(+43.04)DLVYQAK(+45.03)LAE(+43.04)QAE(+43.04)	-	-	MDDREDLVYQAKLAEQAE	R	Acetylation (Protein N-term); Oxidation (M); ethanolamine (DE); ethanolamine (DE); ethanolamine (DE); more	P62258	2441.23	18
1569	M(+42.01)(+15.99)D(+43.04)D(+43.04)RED(+43.04)LVYQAK(+45.03)L	-	-	MDDREDLVYQAKL	A	Acetylation (Protein N-term); Oxidation (M); ethanolamine (DE); ethanolamine (DE); ethanolamine (DE); more	P62258	1826.93	13
1570	M(+42.01)(+15.99)D(+43.04)D(+43.04)RED(+43.04)LVYQAK(+45.03)LAE(+43.04)QA	-	-	MDDREDLVYQAKLAEQA	E	Acetylation (Protein N-term); Oxidation (M); ethanolamine (DE); ethanolamine (DE); ethanolamine (DE); more	P62258	2269.14	17
1571	M(+42.01)(+15.99)D(+43.04)D(+43.04)REDLVYQAK(+45.03)LAE(+43.04)QAE(+43.04)	-	-	MDDREDLVYQAKLAEQAE	R	Acetylation (Protein N-term); Oxidation (M); ethanolamine (DE); ethanolamine (DE); acetyl-d3 (K); more	P62258	2398.19	18
1572	M(+42.01)(+15.99)D(+43.04)DRE(+43.04)D(+43.04)LVYQAK(+45.03)L	-	-	MDDREDLVYQAKL	A	Acetylation (Protein N-term); Oxidation (M); ethanolamine (DE); ethanolamine (DE); ethanolamine (DE); more	P62258	1826.93	13
1573	M(+42.01)(+15.99)D(+43.04)DRE(+43.04)D(+43.04)LVYQAK(+45.03)LAE(+43.04)QA	-	-	MDDREDLVYQAKLAEQA	E	Acetylation (Protein N-term); Oxidation (M); ethanolamine (DE); ethanolamine (DE); ethanolamine (DE); more	P62258	2269.14	17
1574	M(+42.01)(+15.99)D(+43.04)DRE(+43.04)D(+43.04)LVYQAK(+45.03)LAE(+43.04)QAE(+43.04)	-	-	MDDREDLVYQAKLAEQAE	R	Acetylation (Protein N-term); Oxidation (M); ethanolamine (DE); ethanolamine (DE); ethanolamine (DE); more	P62258	2441.23	18
1575	M(+42.01)(+15.99)D(+43.04)DRE(+43.04)D(+43.04)LVYQAK(+45.03)LAEQAE(+43.04)	-	-	MDDREDLVYQAKLAEQAE	R	Acetylation (Protein N-term); Oxidation (M); ethanolamine (DE); ethanolamine (DE); ethanolamine (DE); more	P62258	2398.19	18
1576	M(+42.01)(+15.99)D(+43.04)E(+43.04)K(+45.03)VFTK(+45.03)	-	-	MDEKVFTK	E	Acetylation (Protein N-term); Oxidation (M); ethanolamine (DE); ethanolamine (DE); acetyl-d3 (K); more	P67775	1230.64	8
1577	M(+42.01)(+15.99)D(+43.04)E(+43.04)PSPLAQPLE(+43.04)LNQHS	-	-	MDEPSPLAQPLELNQHS	R	Acetylation (Protein N-term); Oxidation (M); ethanolamine (DE); ethanolamine (DE); ethanolamine (DE)	Q13085	2092.03	17
1578	M(+42.01)(+15.99)D(+43.04)FE(+43.04)D(+43.04)D(+43.04)YTHSAC(+57.02)	-	-	MDFEDDYTHSAC	R	Acetylation (Protein N-term); Oxidation (M); ethanolamine (DE); ethanolamine (DE); ethanolamine (DE); more	Q5BKZ1	1719.69	12
1579	M(+42.01)(+15.99)D(+43.04)GE(+43.04)E(+43.04)K(+45.03)TYGGC(+57.02)E(+43.04)GPDA(+43.04)	-	-	MDGEEKTYGGCEGPDA	M	Acetylation (Protein N-term); Oxidation (M); ethanolamine (DE); ethanolamine (DE); ethanolamine (DE); more	Q15369	2032.89	16
1580	M(+42.01)(+15.99)D(+43.04)GIVPD(+43.04)IAVGTK(+45.03)	-	-	MDGIVPDIAVGTK	R	Acetylation (Protein N-term); Oxidation (M); ethanolamine (DE); ethanolamine (DE); acetyl-d3 (K)	P26599	1503.8	13
1581	M(+42.01)(+15.99)D(+43.04)GIVPDIAVGTK(+45.03)	-	-	MDGIVPDIAVGTK	R	Acetylation (Protein N-term); Oxidation (M); ethanolamine (DE); acetyl-d3 (K)	P26599	1460.76	13
1582	M(+42.01)(+15.99)D(+43.04)GLQASAGPL	-	-	MDGLQASAGPL	R	Acetylation (Protein N-term); Oxidation (M); ethanolamine (DE)	Q9H6W3	1159.55	11
1583	M(+42.01)(+15.99)D(+43.04)HK(+45.03)PLLQE(+43.04)	-	-	MDHKPLLQE	R	Acetylation (Protein N-term); Oxidation (M); ethanolamine (DE); acetyl-d3 (K); ethanolamine (DE)	O95415	1298.67	9
1584	M(+42.01)(+15.99)D(+43.04)HYD(+43.04)SQQTND(+43.04)Y	-	-	MDHYDSQQTNDY	M	Acetylation (Protein N-term); Oxidation (M); ethanolamine (DE); ethanolamine (DE); ethanolamine (DE)	P12814	1702.69	12
1585	M(+42.01)(+15.99)D(+43.04)HYD(+43.04)SQQTNDY(+43.04)	-	-	MDHYDSQQTNDY	M	Acetylation (Protein N-term); Oxidation (M); ethanolamine (DE); ethanolamine (DE); ethanolamine (C-term)	P12814	1702.69	12
1586	M(+42.01)(+15.99)D(+43.04)IAIHHPWI	-	-	MDIAIHHPWI	R	Acetylation (Protein N-term); Oxidation (M); ethanolamine (DE)	P02511	1332.66	10
1587	M(+42.01)(+15.99)D(+43.04)ILK(+45.03)SE(+43.04)IL	-	-	MDILKSEIL	R	Acetylation (Protein N-term); Oxidation (M); ethanolamine (DE); acetyl-d3 (K); ethanolamine (DE)	Q99633	1249.7	9
1588	M(+42.01)(+15.99)D(+43.04)K(+45.03)D(+43.04)C(+57.02)E(+43.04)M(+15.99)K(+45.03)	-	-	MDKDCEMK	R	Acetylation (Protein N-term); Oxidation (M); ethanolamine (DE); acetyl-d3 (K); ethanolamine (DE); more	P16455	1348.59	8
1589	M(+42.01)(+15.99)D(+43.04)K(+45.03)LK(+45.03)K(+45.03)VLSGQD(+43.04)TE(+43.04)D(+43.04)	-	-	MDKLKKVLSGQDTED	R	Acetylation (Protein N-term); Oxidation (M); ethanolamine (DE); acetyl-d3 (K); acetyl-d3 (K); more	O95562	2071.12	15
1590	M(+42.01)(+15.99)D(+43.04)K(+45.03)LK(+45.03)K(+45.03)VLSGQD(+43.04)TED(+43.04)(+43.04)	-	-	MDKLKKVLSGQDTED	R	Acetylation (Protein N-term); Oxidation (M); ethanolamine (DE); acetyl-d3 (K); acetyl-d3 (K); more	O95562	2071.12	15
1591	M(+42.01)(+15.99)D(+43.04)K(+45.03)NE(+43.04)LVQK(+45.03)	-	-	MDKNELVQK	A	Acetylation (Protein N-term); Oxidation (M); ethanolamine (DE); acetyl-d3 (K); ethanolamine (DE); more	P63104	1337.71	9
1592	M(+42.01)(+15.99)D(+43.04)K(+45.03)NE(+43.04)LVQK(+45.03)A	-	-	MDKNELVQKA	K	Acetylation (Protein N-term); Oxidation (M); ethanolamine (DE); acetyl-d3 (K); ethanolamine (DE); more	P63104	1408.75	10
1593	M(+42.01)(+15.99)D(+43.04)K(+45.03)NE(+43.04)LVQK(+45.03)AK(+45.03)	-	-	MDKNELVQKAK	L	Acetylation (Protein N-term); Oxidation (M); ethanolamine (DE); acetyl-d3 (K); ethanolamine (DE); more	P63104	1581.87	11
1594	M(+42.01)(+15.99)D(+43.04)K(+45.03)NE(+43.04)LVQK(+45.03)AK(+45.03)L	-	-	MDKNELVQKAKL	A	Acetylation (Protein N-term); Oxidation (M); ethanolamine (DE); acetyl-d3 (K); ethanolamine (DE); more	P63104	1694.96	12
1595	M(+42.01)(+15.99)D(+43.04)K(+45.03)NE(+43.04)LVQK(+45.03)AK(+45.03)LA	-	-	MDKNELVQKAKLA	E	Acetylation (Protein N-term); Oxidation (M); ethanolamine (DE); acetyl-d3 (K); ethanolamine (DE); more	P63104	1766	13
1596	M(+42.01)(+15.99)D(+43.04)K(+45.03)NE(+43.04)LVQK(+45.03)AK(+45.03)LA(+43.04)	-	-	MDKNELVQKAKLA	E	Acetylation (Protein N-term); Oxidation (M); ethanolamine (DE); acetyl-d3 (K); ethanolamine (DE); more	P63104	1809.04	13
1597	M(+42.01)(+15.99)D(+43.04)K(+45.03)NE(+43.04)LVQK(+45.03)AK(+45.03)LAE(+43.04)Q	-	-	MDKNELVQKAKLAEQ	A	Acetylation (Protein N-term); Oxidation (M); ethanolamine (DE); acetyl-d3 (K); ethanolamine (DE); more	P63104	2066.14	15
1598	M(+42.01)(+15.99)D(+43.04)K(+45.03)NE(+43.04)LVQK(+45.03)AK(+45.03)LAE(+43.04)QA	-	-	MDKNELVQKAKLAEQA	E	Acetylation (Protein N-term); Oxidation (M); ethanolamine (DE); acetyl-d3 (K); ethanolamine (DE); more	P63104	2137.18	16
1599	M(+42.01)(+15.99)D(+43.04)K(+45.03)NE(+43.04)LVQK(+45.03)AK(+45.03)LAE(+43.04)QA(+43.04)	-	-	MDKNELVQKAKLAEQA	E	Acetylation (Protein N-term); Oxidation (M); ethanolamine (DE); acetyl-d3 (K); ethanolamine (DE); more	P63104	2180.22	16
1600	M(+42.01)(+15.99)D(+43.04)K(+45.03)NE(+43.04)LVQK(+45.03)AK(+45.03)LAE(+43.04)QAE	-	-	MDKNELVQKAKLAEQAE	R	Acetylation (Protein N-term); Oxidation (M); ethanolamine (DE); acetyl-d3 (K); ethanolamine (DE); more	P63104	2266.22	17
1601	M(+42.01)(+15.99)D(+43.04)K(+45.03)NE(+43.04)LVQK(+45.03)AK(+45.03)LAE(+43.04)QAE(+43.04)	-	-	MDKNELVQKAKLAEQAE	R	Acetylation (Protein N-term); Oxidation (M); ethanolamine (DE); acetyl-d3 (K); ethanolamine (DE); more	P63104	2309.26	17
1602	M(+42.01)(+15.99)D(+43.04)K(+45.03)NE(+43.04)LVQK(+45.03)AK(+45.03)LAEQ(+43.04)	-	-	MDKNELVQKAKLAEQ	A	Acetylation (Protein N-term); Oxidation (M); ethanolamine (DE); acetyl-d3 (K); ethanolamine (DE); more	P63104	2066.14	15
1603	M(+42.01)(+15.99)D(+43.04)K(+45.03)NE(+43.04)LVQK(+45.03)AK(+45.03)LAEQAE(+43.04)	-	-	MDKNELVQKAKLAEQAE	R	Acetylation (Protein N-term); Oxidation (M); ethanolamine (DE); acetyl-d3 (K); ethanolamine (DE); more	P63104	2266.22	17
1604	M(+42.01)(+15.99)D(+43.04)K(+45.03)NE(+43.04)LVQK(+45.03)AK(+45.03)LAEQAE(+43.04)(+43.04)	-	-	MDKNELVQKAKLAEQAE	R	Acetylation (Protein N-term); Oxidation (M); ethanolamine (DE); acetyl-d3 (K); ethanolamine (DE); more	P63104	2309.26	17
1605	M(+42.01)(+15.99)D(+43.04)K(+45.03)NELVQK(+45.03)AK(+45.03)LAE(+43.04)QAE(+43.04)	-	-	MDKNELVQKAKLAEQAE	R	Acetylation (Protein N-term); Oxidation (M); ethanolamine (DE); acetyl-d3 (K); acetyl-d3 (K); more	P63104	2266.22	17
1606	M(+42.01)(+15.99)D(+43.04)LAAAAE(+43.04)PGAGSQHLE(+43.04)V	-	-	MDLAAAAEPGAGSQHLEV	R	Acetylation (Protein N-term); Oxidation (M); ethanolamine (DE); ethanolamine (DE); ethanolamine (DE)	Q14566	1952.96	18
1607	M(+42.01)(+15.99)D(+43.04)LE(+43.04)NK(+45.03)VK(+45.03)K(+45.03)M(+15.99)	-	-	MDLENKVKKM	G	Acetylation (Protein N-term); Oxidation (M); ethanolamine (DE); ethanolamine (DE); acetyl-d3 (K); more	Q9UGI8	1529.81	10
1608	M(+42.01)(+15.99)D(+43.04)LYSTPAAALD(+43.04)	-	-	MDLYSTPAAALD	R	Acetylation (Protein N-term); Oxidation (M); ethanolamine (DE); ethanolamine (DE)	Q9Y6K5	1410.67	12
1609	M(+42.01)(+15.99)D(+43.04)M(+15.99)GNQHPSIS	-	-	MDMGNQHPSIS	R	Acetylation (Protein N-term); Oxidation (M); ethanolamine (DE); Oxidation (M)	Q9UL15	1332.54	11
1610	M(+42.01)(+15.99)D(+43.04)NQC(+57.02)TVQV	-	-	MDNQCTVQV	R	Acetylation (Protein N-term); Oxidation (M); ethanolamine (DE); Carbamidomethylation	Q03111	1194.5	9
1611	M(+42.01)(+15.99)D(+43.04)NYAD(+43.04)LSD(+43.04)TE(+43.04)LTTLL	-	-	MDNYADLSDTELTTLL	R	Acetylation (Protein N-term); Oxidation (M); ethanolamine (DE); ethanolamine (DE); ethanolamine (DE); more	P50402	2044	16
1612	M(+42.01)(+15.99)D(+43.04)PGK(+45.03)D(+43.04)K(+45.03)E(+43.04)GVPQPSGPPA	-	-	MDPGKDKEGVPQPSGPPA	R	Acetylation (Protein N-term); Oxidation (M); ethanolamine (DE); acetyl-d3 (K); ethanolamine (DE); more	P07992	2083.05	18
1613	M(+42.01)(+15.99)D(+43.04)PGQQPPPQPAPQGQGQPPSQPPQGQGPPSGPGQPAPAATQ	-	-	MDPGQQPPPQPAPQGQGQPPSQPPQGQGPPSGPGQPAPAATQ	A	Acetylation (Protein N-term); Oxidation (M); ethanolamine (DE)	P46937	4187.97	42
1614	M(+42.01)(+15.99)D(+43.04)PLFQQTHK(+45.03)QVHE(+43.04)IQSC(+57.02)M(+15.99)G	-	-	MDPLFQQTHKQVHEIQSCMG	R	Acetylation (Protein N-term); Oxidation (M); ethanolamine (DE); acetyl-d3 (K); ethanolamine (DE); more	O14653	2618.21	20
1615	M(+42.01)(+15.99)D(+43.04)PNTIIE(+43.04)AL	-	-	MDPNTIIEAL	R	Acetylation (Protein N-term); Oxidation (M); ethanolamine (DE); ethanolamine (DE)	O95373	1259.64	10
1616	M(+42.01)(+15.99)D(+43.04)PSGVK(+45.03)VL	-	-	MDPSGVKVL	E	Acetylation (Protein N-term); Oxidation (M); ethanolamine (DE); acetyl-d3 (K)	Q13813	1090.58	9
1617	M(+42.01)(+15.99)D(+43.04)PSGVK(+45.03)VLE(+43.04)TA	-	-	MDPSGVKVLETA	E	Acetylation (Protein N-term); Oxidation (M); ethanolamine (DE); acetyl-d3 (K); ethanolamine (DE)	Q13813	1434.75	12
1618	M(+42.01)(+15.99)D(+43.04)PSGVK(+45.03)VLETA(+43.04)	-	-	MDPSGVKVLETA	E	Acetylation (Protein N-term); Oxidation (M); ethanolamine (DE); acetyl-d3 (K); ethanolamine (C-term)	Q13813	1434.75	12
1619	M(+42.01)(+15.99)D(+43.04)QVM(+15.99)QFVE(+43.04)PS	-	-	MDQVMQFVEPS	R	Acetylation (Protein N-term); Oxidation (M); ethanolamine (DE); Oxidation (M); ethanolamine (DE)	P60059	1469.65	11
1620	M(+42.01)(+15.99)D(+43.04)QVMQFVE(+43.04)PS	-	-	MDQVMQFVEPS	R	Acetylation (Protein N-term); Oxidation (M); ethanolamine (DE); ethanolamine (DE)	P60059	1453.66	11
1621	M(+42.01)(+15.99)D(+43.04)RSGFGE(+43.04)ISSPVI	-	-	MDRSGFGEISSPVI	R	Acetylation (Protein N-term); Oxidation (M); ethanolamine (DE); ethanolamine (DE)	P57740	1637.81	14
1622	M(+42.01)(+15.99)D(+43.04)SE(+43.04)AFQSA	-	-	MDSEAFQSA	R	Acetylation (Protein N-term); Oxidation (M); ethanolamine (DE); ethanolamine (DE)	Q8WUF5	1128.48	9
1623	M(+42.01)(+15.99)D(+43.04)SK(+45.03)YQC(+57.02)VK(+45.03)L	-，-	-，-	MDSKYQCVKL	N，N	Acetylation (Protein N-term); Oxidation (M); ethanolamine (DE); acetyl-d3 (K); Carbamidomethylation; more	P52895，Q04828	1461.71	10
1624	M(+42.01)(+15.99)D(+43.04)SK(+45.03)YQC(+57.02)VK(+45.03)LND(+43.04)	-，-	-，-	MDSKYQCVKLND	G，G	Acetylation (Protein N-term); Oxidation (M); ethanolamine (DE); acetyl-d3 (K); Carbamidomethylation; more	P52895，Q04828	1733.82	12
1625	M(+42.01)(+15.99)D(+43.04)SK(+45.03)YQC(+57.02)VK(+45.03)LND(+43.04)G	-，-	-，-	MDSKYQCVKLNDG	H，H	Acetylation (Protein N-term); Oxidation (M); ethanolamine (DE); acetyl-d3 (K); Carbamidomethylation; more	P52895，Q04828	1790.85	13
1626	M(+42.01)(+15.99)D(+43.04)SK(+45.03)YQC(+57.02)VK(+45.03)LND(+43.04)GH	-，-	-，-	MDSKYQCVKLNDGH	F，F	Acetylation (Protein N-term); Oxidation (M); ethanolamine (DE); acetyl-d3 (K); Carbamidomethylation; more	P52895，Q04828	1927.9	14
1627	M(+42.01)(+15.99)D(+43.04)SK(+45.03)YQC(+57.02)VK(+45.03)LND(+43.04)GHF	-，-	-，-	MDSKYQCVKLNDGHF	M，M	Acetylation (Protein N-term); Oxidation (M); ethanolamine (DE); acetyl-d3 (K); Carbamidomethylation; more	P52895，Q04828	2074.97	15
1628	M(+42.01)(+15.99)D(+43.04)SK(+45.03)YQC(+57.02)VK(+45.03)LND(+43.04)GHFM(+15.99)PVLGF	-，-	-，-	MDSKYQCVKLNDGHFMPVLGF	G，G	Acetylation (Protein N-term); Oxidation (M); ethanolamine (DE); acetyl-d3 (K); Carbamidomethylation; more	P52895，Q04828	2735.3	21
1629	M(+42.01)(+15.99)D(+43.04)SK(+45.03)YQC(+57.02)VK(+45.03)LNDGH(+43.04)	-，-	-，-	MDSKYQCVKLNDGH	F，F	Acetylation (Protein N-term); Oxidation (M); ethanolamine (DE); acetyl-d3 (K); Carbamidomethylation; more	P52895，Q04828	1927.9	14
1630	M(+42.01)(+15.99)D(+43.04)SSAVITQISK(+45.03)E(+43.04)EA(+43.04)	-	-	MDSSAVITQISKEEA	R	Acetylation (Protein N-term); Oxidation (M); ethanolamine (DE); acetyl-d3 (K); ethanolamine (DE); more	Q9GZU7	1839.93	15
1631	M(+42.01)(+15.99)D(+43.04)STLTASE(+43.04)I	-	-	MDSTLTASEI	R	Acetylation (Protein N-term); Oxidation (M); ethanolamine (DE); ethanolamine (DE)	P49588	1210.58	10
1632	M(+42.01)(+15.99)D(+43.04)SVE(+43.04)K(+45.03)GAATSVSNP	-	-	MDSVEKGAATSVSNP	R	Acetylation (Protein N-term); Oxidation (M); ethanolamine (DE); ethanolamine (DE); acetyl-d3 (K)	Q8NFW8	1680.81	15
1633	M(+42.01)(+15.99)D(+43.04)SVE(+43.04)K(+45.03)GAATSVSNPRG	-	-	MDSVEKGAATSVSNPRG	R	Acetylation (Protein N-term); Oxidation (M); ethanolamine (DE); ethanolamine (DE); acetyl-d3 (K)	Q8NFW8	1893.93	17
1634	M(+42.01)(+15.99)D(+43.04)TGVIE(+43.04)GGLN	-	-	MDTGVIEGGLN	V	Acetylation (Protein N-term); Oxidation (M); ethanolamine (DE); ethanolamine (DE)	Q15366	1248.6	11
1635	M(+42.01)(+15.99)D(+43.04)TK(+45.03)E(+43.04)E(+43.04)K(+45.03)K(+45.03)E(+43.04)	-	-	MDTKEEKKE	R	Acetylation (Protein N-term); Oxidation (M); ethanolamine (DE); acetyl-d3 (K); ethanolamine (DE); more	Q8NI08	1501.8	9
1636	M(+42.01)(+15.99)D(+43.04)TLD(+43.04)RVVK(+45.03)PK(+45.03)TK(+45.03)	-	-	MDTLDRVVKPKTK	R	Acetylation (Protein N-term); Oxidation (M); ethanolamine (DE); ethanolamine (DE); acetyl-d3 (K); more	Q9H7B2	1809.04	13
1637	M(+42.01)(+15.99)D(+43.04)TSRVQPIK(+45.03)LA	-	-	MDTSRVQPIKLA	R	Acetylation (Protein N-term); Oxidation (M); ethanolamine (DE); acetyl-d3 (K)	P62857	1503.82	12
1638	M(+42.01)(+15.99)D(+43.04)VFK(+45.03)K(+45.03)GF	-	-	MDVFKKGF	S	Acetylation (Protein N-term); Oxidation (M); ethanolamine (DE); acetyl-d3 (K); acetyl-d3 (K)	O76070	1161.6	8
1639	M(+42.01)(+15.99)D(+43.04)VFLM(+15.99)IR	-	-	MDVFLMIR	R	Acetylation (Protein N-term); Oxidation (M); ethanolamine (DE); Oxidation (M)	Q15370	1140.57	8
1640	M(+42.01)(+15.99)D(+43.04)VFLMI	-	-	MDVFLMI	R	Acetylation (Protein N-term); Oxidation (M); ethanolamine (DE)	Q15370	968.471	7
1641	M(+42.01)(+15.99)D(+43.04)VHD(+43.04)LF	-	-	MDVHDLF	R	Acetylation (Protein N-term); Oxidation (M); ethanolamine (DE); ethanolamine (DE)	Q9Y2R4	1019.47	7
1642	M(+42.01)(+15.99)D(+43.04)VLVSE(+43.04)C(+57.02)SA	-	-	MDVLVSECSA	R	Acetylation (Protein N-term); Oxidation (M); ethanolamine (DE); ethanolamine (DE); Carbamidomethylation	P54136	1253.56	10
1643	M(+42.01)(+15.99)D(+43.04)VNIAPL	-	-	MDVNIAPL	R	Acetylation (Protein N-term); Oxidation (M); ethanolamine (DE)	O75915	972.495	8
1644	M(+42.01)(+15.99)D(+43.04)WVM(+15.99)K(+45.03)HNGPND(+43.04)ASD(+43.04)GTV	-	-	MDWVMKHNGPNDASDGTV	R	Acetylation (Protein N-term); Oxidation (M); ethanolamine (DE); Oxidation (M); acetyl-d3 (K); more	P31942	2221	18
1645	M(+42.01)(+15.99)D(+43.04)WVM(+15.99)K(+45.03)HNGPND(+43.04)ASDGTV(+43.04)	-	-	MDWVMKHNGPNDASDGTV	R	Acetylation (Protein N-term); Oxidation (M); ethanolamine (DE); Oxidation (M); acetyl-d3 (K); more	P31942	2221	18
1646	M(+42.01)(+15.99)D(+43.04)WVMK(+45.03)HNGPND(+43.04)ASD(+43.04)GTV	-	-	MDWVMKHNGPNDASDGTV	R	Acetylation (Protein N-term); Oxidation (M); ethanolamine (DE); acetyl-d3 (K); ethanolamine (DE); more	P31942	2205	18
1647	M(+42.01)(+15.99)D(+43.04)WVMK(+45.03)HNGPND(+43.04)ASDGTV(+43.04)	-	-	MDWVMKHNGPNDASDGTV	R	Acetylation (Protein N-term); Oxidation (M); ethanolamine (DE); acetyl-d3 (K); ethanolamine (DE); more	P31942	2205	18
1648	M(+42.01)(+15.99)DD(+43.04)RE(+43.04)D(+43.04)LVYQAK(+45.03)L	-	-	MDDREDLVYQAKL	A	Acetylation (Protein N-term); Oxidation (M); ethanolamine (DE); ethanolamine (DE); ethanolamine (DE); more	P62258	1826.93	13
1649	M(+42.01)(+15.99)DD(+43.04)RE(+43.04)D(+43.04)LVYQAK(+45.03)LAE(+43.04)QA	-	-	MDDREDLVYQAKLAEQA	E	Acetylation (Protein N-term); Oxidation (M); ethanolamine (DE); ethanolamine (DE); ethanolamine (DE); more	P62258	2269.14	17
1650	M(+42.01)(+15.99)DD(+43.04)RE(+43.04)D(+43.04)LVYQAK(+45.03)LAE(+43.04)QAE(+43.04)	-	-	MDDREDLVYQAKLAEQAE	R	Acetylation (Protein N-term); Oxidation (M); ethanolamine (DE); ethanolamine (DE); ethanolamine (DE); more	P62258	2441.23	18
1651	M(+42.01)(+15.99)DDRE(+43.04)D(+43.04)LVYQAK(+45.03)LAE(+43.04)QAE(+43.04)	-	-	MDDREDLVYQAKLAEQAE	R	Acetylation (Protein N-term); Oxidation (M); ethanolamine (DE); ethanolamine (DE); acetyl-d3 (K); more	P62258	2398.19	18
1652	M(+42.01)(+15.99)DGIVPD(+43.04)IAVGTK(+45.03)	-	-	MDGIVPDIAVGTK	R	Acetylation (Protein N-term); Oxidation (M); ethanolamine (DE); acetyl-d3 (K)	P26599	1460.76	13
1653	M(+42.01)(+15.99)DK(+45.03)NE(+43.04)LVQK(+45.03)AK(+45.03)LAE(+43.04)QAE(+43.04)	-	-	MDKNELVQKAKLAEQAE	R	Acetylation (Protein N-term); Oxidation (M); acetyl-d3 (K); ethanolamine (DE); acetyl-d3 (K); more	P63104	2266.22	17
1654	M(+42.01)(+15.99)E(+43.04)AAAE(+43.04)PGNLAGV	-	-	MEAAAEPGNLAGV	R	Acetylation (Protein N-term); Oxidation (M); ethanolamine (DE); ethanolamine (DE)	Q9Y5Y2	1372.67	13
1655	M(+42.01)(+15.99)E(+43.04)AFQE(+43.04)L	-	-	MEAFQEL	R	Acetylation (Protein N-term); Oxidation (M); ethanolamine (DE); ethanolamine (DE)	Q96JM3	1010.47	7
1656	M(+42.01)(+15.99)E(+43.04)AIAK(+45.03)YD(+43.04)FK(+45.03)ATAD(+43.04)D(+43.04)E(+43.04)LSFK(+45.03)	-	-	MEAIAKYDFKATADDELSFK	R	Acetylation (Protein N-term); Oxidation (M); ethanolamine (DE); acetyl-d3 (K); ethanolamine (DE); more	P62993	2700.4	20
1657	M(+42.01)(+15.99)E(+43.04)AIK(+45.03)K(+45.03)K(+45.03)	-	M	MEAIKKK	M	Acetylation (Protein N-term); Oxidation (M); ethanolamine (DE); acetyl-d3 (K); acetyl-d3 (K); more	P06753	1082.64	7
1658	M(+42.01)(+15.99)E(+43.04)AIK(+45.03)K(+45.03)K(+45.03)M(+15.99)Q	-	M	MEAIKKKMQ	M	Acetylation (Protein N-term); Oxidation (M); ethanolamine (DE); acetyl-d3 (K); acetyl-d3 (K); more	P06753	1357.73	9
1659	M(+42.01)(+15.99)E(+43.04)AIK(+45.03)K(+45.03)K(+45.03)MQ	-	M	MEAIKKKMQ	M	Acetylation (Protein N-term); Oxidation (M); ethanolamine (DE); acetyl-d3 (K); acetyl-d3 (K); more	P06753	1341.73	9
1660	M(+42.01)(+15.99)E(+43.04)AIK(+45.03)K(+45.03)K(+45.03)MQM(+15.99)LK(+45.03)LD(+43.04)K(+45.03)E(+43.04)NALD(+43.04)	-	M	MEAIKKKMQMLKLDKENALD	R	Acetylation (Protein N-term); Oxidation (M); ethanolamine (DE); acetyl-d3 (K); acetyl-d3 (K); more	P06753	2847.57	20
1661	M(+42.01)(+15.99)E(+43.04)AIK(+45.03)K(+45.03)K(+45.03)MQMLK(+45.03)LD(+43.04)K(+45.03)E(+43.04)NALD(+43.04)	-	M	MEAIKKKMQMLKLDKENALD	R	Acetylation (Protein N-term); Oxidation (M); ethanolamine (DE); acetyl-d3 (K); acetyl-d3 (K); more	P06753	2831.58	20
1662	M(+42.01)(+15.99)E(+43.04)AK(+45.03)D(+43.04)QK(+45.03)K(+45.03)H	-	-	MEAKDQKKH	R	Acetylation (Protein N-term); Oxidation (M); ethanolamine (DE); acetyl-d3 (K); ethanolamine (DE); more	Q14692	1392.74	9
1663	M(+42.01)(+15.99)E(+43.04)AK(+45.03)DQK(+45.03)K(+45.03)H	-	-	MEAKDQKKH	R	Acetylation (Protein N-term); Oxidation (M); ethanolamine (DE); acetyl-d3 (K); acetyl-d3 (K); more	Q14692	1349.7	9
1664	M(+42.01)(+15.99)E(+43.04)AK(+45.03)TLGTVTP	-	-	MEAKTLGTVTP	R	Acetylation (Protein N-term); Oxidation (M); ethanolamine (DE); acetyl-d3 (K)	Q9BW66	1292.67	11
1665	M(+42.01)(+15.99)E(+43.04)ALGK(+45.03)LK(+45.03)QFD(+43.04)AYPK(+45.03)TLE(+43.04)D(+43.04)F	-	-	MEALGKLKQFDAYPKTLEDF	R	Acetylation (Protein N-term); Oxidation (M); ethanolamine (DE); acetyl-d3 (K); acetyl-d3 (K); more	Q9Y282	2708.44	20
1666	M(+42.01)(+15.99)E(+43.04)ALGK(+45.03)LK(+45.03)QFD(+43.04)AYPK(+45.03)TLE(+43.04)DF(+43.04)	-	-	MEALGKLKQFDAYPKTLEDF	R	Acetylation (Protein N-term); Oxidation (M); ethanolamine (DE); acetyl-d3 (K); acetyl-d3 (K); more	Q9Y282	2708.44	20
1667	M(+42.01)(+15.99)E(+43.04)APE(+43.04)E(+43.04)PAPV	-	-	MEAPEEPAPV	R	Acetylation (Protein N-term); Oxidation (M); ethanolamine (DE); ethanolamine (DE); ethanolamine (DE)	Q96FL8	1255.61	10
1668	M(+42.01)(+15.99)E(+43.04)ATGVLPFV	-	-	MEATGVLPFV	R	Acetylation (Protein N-term); Oxidation (M); ethanolamine (DE)	Q13045	1163.59	10
1669	M(+42.01)(+15.99)E(+43.04)ATLE(+43.04)QHLE(+43.04)D(+43.04)T	-	-	MEATLEQHLEDT	M	Acetylation (Protein N-term); Oxidation (M); ethanolamine (DE); ethanolamine (DE); ethanolamine (DE); more	O43504	1645.8	12
1670	M(+42.01)(+15.99)E(+43.04)D(+43.04)LD(+43.04)QSPLVSSSD(+43.04)	-	-	MEDLDQSPLVSSSD	S	Acetylation (Protein N-term); Oxidation (M); ethanolamine (DE); ethanolamine (DE); ethanolamine (DE); more	Q9NQC3	1751.82	14
1671	M(+42.01)(+15.99)E(+43.04)D(+43.04)LD(+43.04)QSPLVSSSD(+43.04)SPPRPQPAFK(+45.03)YQFV	-	-	MEDLDQSPLVSSSDSPPRPQPAFKYQFV	R	Acetylation (Protein N-term); Oxidation (M); ethanolamine (DE); ethanolamine (DE); ethanolamine (DE); more	Q9NQC3	3439.72	28
1672	M(+42.01)(+15.99)E(+43.04)D(+43.04)PTLYIVE(+43.04)	-	-	MEDPTLYIVE	R	Acetylation (Protein N-term); Oxidation (M); ethanolamine (DE); ethanolamine (DE); ethanolamine (DE)	Q6NZI2	1395.7	10
1673	M(+42.01)(+15.99)E(+43.04)D(+43.04)SASASLSSA	-	-	MEDSASASLSSA	A	Acetylation (Protein N-term); Oxidation (M); ethanolamine (DE); ethanolamine (DE)	O76021	1298.57	12
1674	M(+42.01)(+15.99)E(+43.04)D(+43.04)SASASLSSAAATGTSTSTPAAPTA	-	-	MEDSASASLSSAAATGTSTSTPAAPTA	R	Acetylation (Protein N-term); Oxidation (M); ethanolamine (DE); ethanolamine (DE)	O76021	2584.18	27
1675	M(+42.01)(+15.99)E(+43.04)D(+43.04)SHK(+45.03)STTSE(+43.04)TAPQPGSAVQGAHIS	-	-	MEDSHKSTTSETAPQPGSAVQGAHIS	H	Acetylation (Protein N-term); Oxidation (M); ethanolamine (DE); ethanolamine (DE); acetyl-d3 (K); more	P18846	2884.37	26
1676	M(+42.01)(+15.99)E(+43.04)D(+43.04)SM(+15.99)D(+43.04)MD(+43.04)MSPL	-	-	MEDSMDMDMSPL	R	Acetylation (Protein N-term); Oxidation (M); ethanolamine (DE); ethanolamine (DE); Oxidation (M); more	P06748	1646.67	12
1677	M(+42.01)(+15.99)E(+43.04)D(+43.04)SM(+15.99)D(+43.04)MDM(+15.99)SPL	-	-	MEDSMDMDMSPL	R	Acetylation (Protein N-term); Oxidation (M); ethanolamine (DE); ethanolamine (DE); Oxidation (M); more	P06748	1619.62	12
1678	M(+42.01)(+15.99)E(+43.04)D(+43.04)SM(+15.99)D(+43.04)MDMSPL	-	-	MEDSMDMDMSPL	R	Acetylation (Protein N-term); Oxidation (M); ethanolamine (DE); ethanolamine (DE); Oxidation (M); more	P06748	1603.62	12
1679	M(+42.01)(+15.99)E(+43.04)D(+43.04)SM(+15.99)DM(+15.99)D(+43.04)MSPL	-	-	MEDSMDMDMSPL	R	Acetylation (Protein N-term); Oxidation (M); ethanolamine (DE); ethanolamine (DE); Oxidation (M); more	P06748	1619.62	12
1680	M(+42.01)(+15.99)E(+43.04)D(+43.04)SM(+15.99)DMD(+43.04)M(+15.99)SPL	-	-	MEDSMDMDMSPL	R	Acetylation (Protein N-term); Oxidation (M); ethanolamine (DE); ethanolamine (DE); Oxidation (M); more	P06748	1619.62	12
1681	M(+42.01)(+15.99)E(+43.04)D(+43.04)SM(+15.99)DMD(+43.04)MSPL	-	-	MEDSMDMDMSPL	R	Acetylation (Protein N-term); Oxidation (M); ethanolamine (DE); ethanolamine (DE); Oxidation (M); more	P06748	1603.62	12
1682	M(+42.01)(+15.99)E(+43.04)D(+43.04)SMD(+43.04)M(+15.99)D(+43.04)MSPL	-	-	MEDSMDMDMSPL	R	Acetylation (Protein N-term); Oxidation (M); ethanolamine (DE); ethanolamine (DE); ethanolamine (DE); more	P06748	1646.67	12
1683	M(+42.01)(+15.99)E(+43.04)D(+43.04)SMD(+43.04)M(+15.99)DM(+15.99)SPL	-	-	MEDSMDMDMSPL	R	Acetylation (Protein N-term); Oxidation (M); ethanolamine (DE); ethanolamine (DE); ethanolamine (DE); more	P06748	1619.62	12
1684	M(+42.01)(+15.99)E(+43.04)D(+43.04)SMD(+43.04)MD(+43.04)M(+15.99)SPL	-	-	MEDSMDMDMSPL	R	Acetylation (Protein N-term); Oxidation (M); ethanolamine (DE); ethanolamine (DE); ethanolamine (DE); more	P06748	1646.67	12
1685	M(+42.01)(+15.99)E(+43.04)D(+43.04)SMD(+43.04)MD(+43.04)MSPL	-	-	MEDSMDMDMSPL	R	Acetylation (Protein N-term); Oxidation (M); ethanolamine (DE); ethanolamine (DE); ethanolamine (DE); more	P06748	1630.67	12
1686	M(+42.01)(+15.99)E(+43.04)D(+43.04)SMD(+43.04)MDM(+15.99)SPL	-	-	MEDSMDMDMSPL	R	Acetylation (Protein N-term); Oxidation (M); ethanolamine (DE); ethanolamine (DE); ethanolamine (DE); more	P06748	1603.62	12
1687	M(+42.01)(+15.99)E(+43.04)D(+43.04)SMDM(+15.99)D(+43.04)M(+15.99)SPL	-	-	MEDSMDMDMSPL	R	Acetylation (Protein N-term); Oxidation (M); ethanolamine (DE); ethanolamine (DE); Oxidation (M); more	P06748	1619.62	12
1688	M(+42.01)(+15.99)E(+43.04)D(+43.04)VNSNVNAD(+43.04)QEV(+43.04)	-	-	MEDVNSNVNADQEV	R	Acetylation (Protein N-term); Oxidation (M); ethanolamine (DE); ethanolamine (DE); ethanolamine (DE); more	Q9P270	1792.83	14
1689	M(+42.01)(+15.99)E(+43.04)D(+43.04)YTK(+45.03)IE(+43.04)K(+45.03)IGE(+43.04)GTYGVVYK(+45.03)G	-	-	MEDYTKIEKIGEGTYGVVYKG	R	Acetylation (Protein N-term); Oxidation (M); ethanolamine (DE); ethanolamine (DE); acetyl-d3 (K); more	P06493	2744.43	21
1690	M(+42.01)(+15.99)E(+43.04)DLD(+43.04)QSPLVSSSD(+43.04)SPPRPQPAFK(+45.03)YQFV	-	-	MEDLDQSPLVSSSDSPPRPQPAFKYQFV	R	Acetylation (Protein N-term); Oxidation (M); ethanolamine (DE); ethanolamine (DE); ethanolamine (DE); more	Q9NQC3	3396.67	28
1691	M(+42.01)(+15.99)E(+43.04)DSM(+15.99)D(+43.04)M(+15.99)D(+43.04)MSPL	-	-	MEDSMDMDMSPL	R	Acetylation (Protein N-term); Oxidation (M); ethanolamine (DE); Oxidation (M); ethanolamine (DE); more	P06748	1619.62	12
1692	M(+42.01)(+15.99)E(+43.04)DSM(+15.99)D(+43.04)MD(+43.04)M(+15.99)SPL	-	-	MEDSMDMDMSPL	R	Acetylation (Protein N-term); Oxidation (M); ethanolamine (DE); Oxidation (M); ethanolamine (DE); more	P06748	1619.62	12
1693	M(+42.01)(+15.99)E(+43.04)DSM(+15.99)DM(+15.99)D(+43.04)M(+15.99)SPL	-	-	MEDSMDMDMSPL	R	Acetylation (Protein N-term); Oxidation (M); ethanolamine (DE); Oxidation (M); Oxidation (M); more	P06748	1592.57	12
1694	M(+42.01)(+15.99)E(+43.04)DSM(+15.99)DMD(+43.04)M(+15.99)SPL	-	-	MEDSMDMDMSPL	R	Acetylation (Protein N-term); Oxidation (M); ethanolamine (DE); Oxidation (M); ethanolamine (DE); more	P06748	1576.58	12
1695	M(+42.01)(+15.99)E(+43.04)DSMD(+43.04)M(+15.99)D(+43.04)M(+15.99)SPL	-	-	MEDSMDMDMSPL	R	Acetylation (Protein N-term); Oxidation (M); ethanolamine (DE); ethanolamine (DE); Oxidation (M); more	P06748	1619.62	12
1696	M(+42.01)(+15.99)E(+43.04)DSMD(+43.04)MD(+43.04)M(+15.99)SPL	-	-	MEDSMDMDMSPL	R	Acetylation (Protein N-term); Oxidation (M); ethanolamine (DE); ethanolamine (DE); ethanolamine (DE); more	P06748	1603.62	12
1697	M(+42.01)(+15.99)E(+43.04)E(+43.04)AE(+43.04)LVK(+45.03)G	-	-	MEEAELVKG	R	Acetylation (Protein N-term); Oxidation (M); ethanolamine (DE); ethanolamine (DE); ethanolamine (DE); more	Q9NP74	1236.65	9
1698	M(+42.01)(+15.99)E(+43.04)E(+43.04)D(+43.04)QE(+43.04)LE(+43.04)	-，-	-，-	MEEDQELE	R，R	Acetylation (Protein N-term); Oxidation (M); ethanolamine (DE); ethanolamine (DE); ethanolamine (DE); more	P0DPB6，P0DPB5	1294.61	8
1699	M(+42.01)(+15.99)E(+43.04)E(+43.04)E(+43.04)LQHSHC(+57.02)VNC(+57.02)VS	-	-	MEEELQHSHCVNCVS	R	Acetylation (Protein N-term); Oxidation (M); ethanolamine (DE); ethanolamine (DE); ethanolamine (DE); more	Q8TB52	2044.88	15
1700	M(+42.01)(+15.99)E(+43.04)E(+43.04)IGILVE(+43.04)K(+45.03)AQD(+43.04)E(+43.04)IPALSVS	-	-	MEEIGILVEKAQDEIPALSVS	R	Acetylation (Protein N-term); Oxidation (M); ethanolamine (DE); ethanolamine (DE); ethanolamine (DE); more	P43686	2588.42	21
1701	M(+42.01)(+15.99)E(+43.04)E(+43.04)LSAD(+43.04)E(+43.04)I	-	-	MEELSADEI	R	Acetylation (Protein N-term); Oxidation (M); ethanolamine (DE); ethanolamine (DE); ethanolamine (DE); more	O95155	1265.62	9
1702	M(+42.01)(+15.99)E(+43.04)E(+43.04)LSAD(+43.04)E(+43.04)IR	-	-	MEELSADEIR	R	Acetylation (Protein N-term); Oxidation (M); ethanolamine (DE); ethanolamine (DE); ethanolamine (DE); more	O95155	1421.72	10
1703	M(+42.01)(+15.99)E(+43.04)E(+43.04)LVVE(+43.04)V	-	-	MEELVVEV	R	Acetylation (Protein N-term); Oxidation (M); ethanolamine (DE); ethanolamine (DE); ethanolamine (DE)	Q06787	1133.6	8
1704	M(+42.01)(+15.99)E(+43.04)E(+43.04)LVVEV(+43.04)	-	-	MEELVVEV	R	Acetylation (Protein N-term); Oxidation (M); ethanolamine (DE); ethanolamine (DE); ethanolamine (C-term)	Q06787	1133.6	8
1705	M(+42.01)(+15.99)E(+43.04)E(+43.04)PQAGD(+43.04)AA	-	-	MEEPQAGDAA	R	Acetylation (Protein N-term); Oxidation (M); ethanolamine (DE); ethanolamine (DE); ethanolamine (DE)	O15446	1204.54	10
1706	M(+42.01)(+15.99)E(+43.04)E(+43.04)VPHD(+43.04)C(+57.02)PGAD(+43.04)SAQAG	-	-	MEEVPHDCPGADSAQAG	R	Acetylation (Protein N-term); Oxidation (M); ethanolamine (DE); ethanolamine (DE); ethanolamine (DE); more	P53384	1999.87	17
1707	M(+42.01)(+15.99)E(+43.04)FD(+43.04)LGAALE(+43.04)PTSQK(+45.03)PGVGAGHGGD(+43.04)PK(+45.03)LSPHK(+45.03)VQG	-	-	MEFDLGAALEPTSQKPGVGAGHGGDPKLSPHKVQG	R	Acetylation (Protein N-term); Oxidation (M); ethanolamine (DE); ethanolamine (DE); ethanolamine (DE); more	Q9GZP8	3877.01	35
1708	M(+42.01)(+15.99)E(+43.04)FQAVVM(+15.99)AVGGGS	-	-	MEFQAVVMAVGGGS	R	Acetylation (Protein N-term); Oxidation (M); ethanolamine (DE); Oxidation (M)	Q9NR50	1498.68	14
1709	M(+42.01)(+15.99)E(+43.04)FQAVVMAVGGGS	-	-	MEFQAVVMAVGGGS	R	Acetylation (Protein N-term); Oxidation (M); ethanolamine (DE)	Q9NR50	1482.68	14
1710	M(+42.01)(+15.99)E(+43.04)GAK(+45.03)PTLQLVYQAVQ	-	-	MEGAKPTLQLVYQAVQ	A	Acetylation (Protein N-term); Oxidation (M); ethanolamine (DE); acetyl-d3 (K)	Q9Y5L0	1921.01	16
1711	M(+42.01)(+15.99)E(+43.04)GC(+57.02)VSNL	-	-	MEGCVSNL	M	Acetylation (Protein N-term); Oxidation (M); ethanolamine (DE); Carbamidomethylation	O75832	1009.42	8
1712	M(+42.01)(+15.99)E(+43.04)GC(+57.02)VSNLM(+15.99)VC(+57.02)NL	-	-	MEGCVSNLMVCNL	A	Acetylation (Protein N-term); Oxidation (M); ethanolamine (DE); Carbamidomethylation; Oxidation (M); more	O75832	1642.68	13
1713	M(+42.01)(+15.99)E(+43.04)GGGGSGNK(+45.03)TTGGLAGFFGAGGAGYSHAD(+43.04)L	-	-	MEGGGGSGNKTTGGLAGFFGAGGAGYSHADL	A	Acetylation (Protein N-term); Oxidation (M); ethanolamine (DE); acetyl-d3 (K); ethanolamine (DE)	O14925	2989.37	31
1714	M(+42.01)(+15.99)E(+43.04)GGPAVC(+57.02)C(+57.02)QD(+43.04)P	-	-	MEGGPAVCCQDP	R	Acetylation (Protein N-term); Oxidation (M); ethanolamine (DE); Carbamidomethylation; Carbamidomethylation; more	Q8N5S9	1463.58	12
1715	M(+42.01)(+15.99)E(+43.04)GPLSVFGD(+43.04)	-	-	MEGPLSVFGD	R	Acetylation (Protein N-term); Oxidation (M); ethanolamine (DE); ethanolamine (DE)	P17987	1194.56	10
1716	M(+42.01)(+15.99)E(+43.04)GPLSVFGD(+43.04)RS	-	-	MEGPLSVFGDRS	T	Acetylation (Protein N-term); Oxidation (M); ethanolamine (DE); ethanolamine (DE)	P17987	1437.69	12
1717	M(+42.01)(+15.99)E(+43.04)GPLSVFGD(+43.04)RSTG	-	-	MEGPLSVFGDRSTG	E	Acetylation (Protein N-term); Oxidation (M); ethanolamine (DE); ethanolamine (DE)	P17987	1595.76	14
1718	M(+42.01)(+15.99)E(+43.04)GPLSVFGD(+43.04)RSTGE(+43.04)TI	-	-	MEGPLSVFGDRSTGETI	R	Acetylation (Protein N-term); Oxidation (M); ethanolamine (DE); ethanolamine (DE); ethanolamine (DE)	P17987	1981.98	17
1719	M(+42.01)(+15.99)E(+43.04)GPLSVFGD(+43.04)RSTGETI	-	-	MEGPLSVFGDRSTGETI	R	Acetylation (Protein N-term); Oxidation (M); ethanolamine (DE); ethanolamine (DE)	P17987	1938.94	17
1720	M(+42.01)(+15.99)E(+43.04)GPLSVFGD(+43.04)RSTGETI(+43.04)	-	-	MEGPLSVFGDRSTGETI	R	Acetylation (Protein N-term); Oxidation (M); ethanolamine (DE); ethanolamine (DE); ethanolamine (C-term)	P17987	1981.98	17
1721	M(+42.01)(+15.99)E(+43.04)GPLSVFGDRS(+43.04)	-	-	MEGPLSVFGDRS	T	Acetylation (Protein N-term); Oxidation (M); ethanolamine (DE); ethanolamine (C-term)	P17987	1437.69	12
1722	M(+42.01)(+15.99)E(+43.04)GPLSVFGDRSTG(+43.04)	-	-	MEGPLSVFGDRSTG	E	Acetylation (Protein N-term); Oxidation (M); ethanolamine (DE); ethanolamine (C-term)	P17987	1595.76	14
1723	M(+42.01)(+15.99)E(+43.04)GPLSVFGDRSTGE(+43.04)TI	-	-	MEGPLSVFGDRSTGETI	R	Acetylation (Protein N-term); Oxidation (M); ethanolamine (DE); ethanolamine (DE)	P17987	1938.94	17
1724	M(+42.01)(+15.99)E(+43.04)GQSVE(+43.04)E(+43.04)LL	-	-	MEGQSVEELL	A	Acetylation (Protein N-term); Oxidation (M); ethanolamine (DE); ethanolamine (DE); ethanolamine (DE)	Q15050	1320.66	10
1725	M(+42.01)(+15.99)E(+43.04)GSASPPE(+43.04)K(+45.03)PRA	-	-	MEGSASPPEKPRA	R	Acetylation (Protein N-term); Oxidation (M); ethanolamine (DE); ethanolamine (DE); acetyl-d3 (K)	Q96NT5	1544.77	13
1726	M(+42.01)(+15.99)E(+43.04)GSGE(+43.04)QPGPQPQHPGD(+43.04)H	-	-	MEGSGEQPGPQPQHPGDH	R	Acetylation (Protein N-term); Oxidation (M); ethanolamine (DE); ethanolamine (DE); ethanolamine (DE)	Q9UJA5	2070.92	18
1727	M(+42.01)(+15.99)E(+43.04)GSGE(+43.04)QPGPQPQHPGDH(+43.04)	-	-	MEGSGEQPGPQPQHPGDH	R	Acetylation (Protein N-term); Oxidation (M); ethanolamine (DE); ethanolamine (DE); ethanolamine (C-term)	Q9UJA5	2070.92	18
1728	M(+42.01)(+15.99)E(+43.04)GVE(+43.04)E(+43.04)K(+45.03)K(+45.03)K(+45.03)	-	-	MEGVEEKKK	E	Acetylation (Protein N-term); Oxidation (M); ethanolamine (DE); ethanolamine (DE); ethanolamine (DE); more	P18124	1398.77	9
1729	M(+42.01)(+15.99)E(+43.04)GVE(+43.04)E(+43.04)K(+45.03)K(+45.03)K(+45.03)E(+43.04)VPAVP	-	-	MEGVEEKKKEVPAVP	E	Acetylation (Protein N-term); Oxidation (M); ethanolamine (DE); ethanolamine (DE); ethanolamine (DE); more	P18124	2034.14	15
1730	M(+42.01)(+15.99)E(+43.04)GVE(+43.04)E(+43.04)K(+45.03)K(+45.03)K(+45.03)E(+43.04)VPAVPE(+43.04)TLK(+45.03)K(+45.03)K(+45.03)	-	-	MEGVEEKKKEVPAVPETLKKK	R	Acetylation (Protein N-term); Oxidation (M); ethanolamine (DE); ethanolamine (DE); ethanolamine (DE); more	P18124	2939.73	21
1731	M(+42.01)(+15.99)E(+43.04)GVE(+43.04)E(+43.04)K(+45.03)K(+45.03)K(+45.03)E(+43.04)VPAVPETLK(+45.03)K(+45.03)K(+45.03)	-	-	MEGVEEKKKEVPAVPETLKKK	R	Acetylation (Protein N-term); Oxidation (M); ethanolamine (DE); ethanolamine (DE); ethanolamine (DE); more	P18124	2896.69	21
1732	M(+42.01)(+15.99)E(+43.04)GVE(+43.04)E(+43.04)K(+45.03)K(+45.03)K(+45.03)EVPAVPE(+43.04)TLK(+45.03)K(+45.03)K(+45.03)	-	-	MEGVEEKKKEVPAVPETLKKK	R	Acetylation (Protein N-term); Oxidation (M); ethanolamine (DE); ethanolamine (DE); ethanolamine (DE); more	P18124	2896.69	21
1733	M(+42.01)(+15.99)E(+43.04)GVE(+43.04)EK(+45.03)K(+45.03)K(+45.03)E(+43.04)VPAVPE(+43.04)TLK(+45.03)K(+45.03)K(+45.03)	-	-	MEGVEEKKKEVPAVPETLKKK	R	Acetylation (Protein N-term); Oxidation (M); ethanolamine (DE); ethanolamine (DE); acetyl-d3 (K); more	P18124	2896.69	21
1734	M(+42.01)(+15.99)E(+43.04)GVEE(+43.04)K(+45.03)K(+45.03)K(+45.03)	-	-	MEGVEEKKK	E	Acetylation (Protein N-term); Oxidation (M); ethanolamine (DE); ethanolamine (DE); acetyl-d3 (K); more	P18124	1355.73	9
1735	M(+42.01)(+15.99)E(+43.04)IPPTNYPAS	-	-	MEIPPTNYPAS	R	Acetylation (Protein N-term); Oxidation (M); ethanolamine (DE)	Q9BS40	1319.61	11
1736	M(+42.01)(+15.99)E(+43.04)K(+45.03)SSSC(+57.02)E(+43.04)SLGSQPAAA	-	-	MEKSSSCESLGSQPAAA	R	Acetylation (Protein N-term); Oxidation (M); ethanolamine (DE); acetyl-d3 (K); Carbamidomethylation; more	Q13614	1927.87	17
1737	M(+42.01)(+15.99)E(+43.04)K(+45.03)TE(+43.04)LIQ	-	-	MEKTELIQ	K	Acetylation (Protein N-term); Oxidation (M); ethanolamine (DE); acetyl-d3 (K); ethanolamine (DE)	P27348	1179.62	8
1738	M(+42.01)(+15.99)E(+43.04)K(+45.03)TE(+43.04)LIQK(+45.03)	-	-	MEKTELIQK	A	Acetylation (Protein N-term); Oxidation (M); ethanolamine (DE); acetyl-d3 (K); ethanolamine (DE); more	P27348	1352.75	9
1739	M(+42.01)(+15.99)E(+43.04)K(+45.03)TE(+43.04)LIQK(+45.03)AK(+45.03)	-	-	MEKTELIQKAK	L	Acetylation (Protein N-term); Oxidation (M); ethanolamine (DE); acetyl-d3 (K); ethanolamine (DE); more	P27348	1596.91	11
1740	M(+42.01)(+15.99)E(+43.04)K(+45.03)TE(+43.04)LIQK(+45.03)AK(+45.03)L	-	-	MEKTELIQKAKL	A	Acetylation (Protein N-term); Oxidation (M); ethanolamine (DE); acetyl-d3 (K); ethanolamine (DE); more	P27348	1709.99	12
1741	M(+42.01)(+15.99)E(+43.04)K(+45.03)TE(+43.04)LIQK(+45.03)AK(+45.03)LA	-	-	MEKTELIQKAKLA	E	Acetylation (Protein N-term); Oxidation (M); ethanolamine (DE); acetyl-d3 (K); ethanolamine (DE); more	P27348	1781.03	13
1742	M(+42.01)(+15.99)E(+43.04)K(+45.03)TE(+43.04)LIQK(+45.03)AK(+45.03)LA(+43.04)	-	-	MEKTELIQKAKLA	E	Acetylation (Protein N-term); Oxidation (M); ethanolamine (DE); acetyl-d3 (K); ethanolamine (DE); more	P27348	1824.07	13
1743	M(+42.01)(+15.99)E(+43.04)K(+45.03)TE(+43.04)LIQK(+45.03)AK(+45.03)LAE(+43.04)QA	-	-	MEKTELIQKAKLAEQA	E	Acetylation (Protein N-term); Oxidation (M); ethanolamine (DE); acetyl-d3 (K); ethanolamine (DE); more	P27348	2152.21	16
1744	M(+42.01)(+15.99)E(+43.04)K(+45.03)TE(+43.04)LIQK(+45.03)AK(+45.03)LAE(+43.04)QAE	-	-	MEKTELIQKAKLAEQAE	R	Acetylation (Protein N-term); Oxidation (M); ethanolamine (DE); acetyl-d3 (K); ethanolamine (DE); more	P27348	2281.25	17
1745	M(+42.01)(+15.99)E(+43.04)K(+45.03)TE(+43.04)LIQK(+45.03)AK(+45.03)LAE(+43.04)QAE(+43.04)	-	-	MEKTELIQKAKLAEQAE	R	Acetylation (Protein N-term); Oxidation (M); ethanolamine (DE); acetyl-d3 (K); ethanolamine (DE); more	P27348	2324.3	17
1746	M(+42.01)(+15.99)E(+43.04)K(+45.03)TE(+43.04)LIQK(+45.03)AK(+45.03)LAEQAE(+43.04)(+43.04)	-	-	MEKTELIQKAKLAEQAE	R	Acetylation (Protein N-term); Oxidation (M); ethanolamine (DE); acetyl-d3 (K); ethanolamine (DE); more	P27348	2324.3	17
1747	M(+42.01)(+15.99)E(+43.04)K(+45.03)TELIQK(+45.03)AK(+45.03)L	-	-	MEKTELIQKAKL	A	Acetylation (Protein N-term); Oxidation (M); ethanolamine (DE); acetyl-d3 (K); acetyl-d3 (K); more	P27348	1666.95	12
1748	M(+42.01)(+15.99)E(+43.04)K(+45.03)TELIQK(+45.03)AK(+45.03)LAE(+43.04)QAE(+43.04)	-	-	MEKTELIQKAKLAEQAE	R	Acetylation (Protein N-term); Oxidation (M); ethanolamine (DE); acetyl-d3 (K); acetyl-d3 (K); more	P27348	2281.25	17
1749	M(+42.01)(+15.99)E(+43.04)K(+45.03)TLE(+43.04)TVPLE(+43.04)	-	-	MEKTLETVPLE	R	Acetylation (Protein N-term); Oxidation (M); ethanolamine (DE); acetyl-d3 (K); ethanolamine (DE); more	P22626	1520.82	11
1750	M(+42.01)(+15.99)E(+43.04)K(+45.03)TQE(+43.04)TVQ	-	-	MEKTQETVQ	R	Acetylation (Protein N-term); Oxidation (M); ethanolamine (DE); acetyl-d3 (K); ethanolamine (DE)	O95749	1281.63	9
1751	M(+42.01)(+15.99)E(+43.04)LITIL	-	-	MELITIL	E	Acetylation (Protein N-term); Oxidation (M); ethanolamine (DE)	Q14974	932.525	7
1752	M(+42.01)(+15.99)E(+43.04)LITILE(+43.04)K(+45.03)TVSPD(+43.04)	-	-	MELITILEKTVSPD	R	Acetylation (Protein N-term); Oxidation (M); ethanolamine (DE); ethanolamine (DE); acetyl-d3 (K); more	Q14974	1820	14
1753	M(+42.01)(+15.99)E(+43.04)LITILEK(+45.03)TVSPD(+43.04)	-	-	MELITILEKTVSPD	R	Acetylation (Protein N-term); Oxidation (M); ethanolamine (DE); acetyl-d3 (K); ethanolamine (DE)	Q14974	1776.96	14
1754	M(+42.01)(+15.99)E(+43.04)LPSGPGPE(+43.04)	-	-	MELPSGPGPE	R	Acetylation (Protein N-term); Oxidation (M); ethanolamine (DE); ethanolamine (DE)	Q9Y679	1156.54	10
1755	M(+42.01)(+15.99)E(+43.04)LQK(+45.03)GK(+45.03)GAAAAAAASGAAGGGGGGAGAGAPGGG	-	-	MELQKGKGAAAAAAASGAAGGGGGGAGAGAPGGG	R	Acetylation (Protein N-term); Oxidation (M); ethanolamine (DE); acetyl-d3 (K); acetyl-d3 (K)	Q68E01	2801.36	34
1756	M(+42.01)(+15.99)E(+43.04)LQPPE(+43.04)ASIAVVSIP	-	-	MELQPPEASIAVVSIP	R	Acetylation (Protein N-term); Oxidation (M); ethanolamine (DE); ethanolamine (DE)	P08195	1823.97	16
1757	M(+42.01)(+15.99)E(+43.04)LSD(+43.04)ANLQTLT	-	-	MELSDANLQTLT	E	Acetylation (Protein N-term); Oxidation (M); ethanolamine (DE); ethanolamine (DE)	P55060	1478.73	12
1758	M(+42.01)(+15.99)E(+43.04)LSD(+43.04)ANLQTLTE(+43.04)YLK(+45.03)K(+45.03)TLD(+43.04)PD(+43.04)PAI	-	-	MELSDANLQTLTEYLKKTLDPDPAI	R	Acetylation (Protein N-term); Oxidation (M); ethanolamine (DE); ethanolamine (DE); ethanolamine (DE); more	P55060	3181.71	25
1759	M(+42.01)(+15.99)E(+43.04)LVQVLK(+45.03)	-	-	MELVQVLK	R	Acetylation (Protein N-term); Oxidation (M); ethanolamine (DE); acetyl-d3 (K)	Q9UI09	1104.63	8
1760	M(+42.01)(+15.99)E(+43.04)M(+15.99)K(+45.03)K(+45.03)K(+45.03)INLE(+43.04)L	-	-	MEMKKKINLEL	R	Acetylation (Protein N-term); Oxidation (M); ethanolamine (DE); Oxidation (M); acetyl-d3 (K); more	Q9BTT0	1670.93	11
1761	M(+42.01)(+15.99)E(+43.04)M(+15.99)PLPPD(+43.04)D(+43.04)QE(+43.04)L	-	-	MEMPLPPDDQEL	R	Acetylation (Protein N-term); Oxidation (M); ethanolamine (DE); Oxidation (M); ethanolamine (DE); more	Q8IWX8	1659.78	12
1762	M(+42.01)(+15.99)E(+43.04)M(+15.99)TE(+43.04)M(+15.99)TGVSLK(+45.03)	-	-	MEMTEMTGVSLK	R	Acetylation (Protein N-term); Oxidation (M); ethanolamine (DE); Oxidation (M); ethanolamine (DE); more	Q96PZ0	1576.72	12
1763	M(+42.01)(+15.99)E(+43.04)MTE(+43.04)M(+15.99)TGVSLK(+45.03)	-	-	MEMTEMTGVSLK	R	Acetylation (Protein N-term); Oxidation (M); ethanolamine (DE); ethanolamine (DE); Oxidation (M); more	Q96PZ0	1560.73	12
1764	M(+42.01)(+15.99)E(+43.04)NAHTK(+45.03)TV	-	-	MENAHTKTV	E	Acetylation (Protein N-term); Oxidation (M); ethanolamine (DE); acetyl-d3 (K)	P16615	1175.57	9
1765	M(+42.01)(+15.99)E(+43.04)NK(+45.03)K(+45.03)K(+45.03)D(+43.04)K(+45.03)D(+43.04)K(+45.03)SD(+43.04)D(+43.04)	-	-	MENKKKDKDKSDD	R	Acetylation (Protein N-term); Oxidation (M); ethanolamine (DE); acetyl-d3 (K); acetyl-d3 (K); more	Q9Y6M4	2078.11	13
1766	M(+42.01)(+15.99)E(+43.04)NLK(+45.03)HIITLGQVIHK(+45.03)	-	-	MENLKHIITLGQVIHK	R	Acetylation (Protein N-term); Oxidation (M); ethanolamine (DE); acetyl-d3 (K); acetyl-d3 (K)	Q8NB16	2064.17	16
1767	M(+42.01)(+15.99)E(+43.04)NQVLTPHVYWAQ	-	-	MENQVLTPHVYWAQ	R	Acetylation (Protein N-term); Oxidation (M); ethanolamine (DE)	Q9P035	1815.86	14
1768	M(+42.01)(+15.99)E(+43.04)NSQLC(+57.02)K(+45.03)L	-	-	MENSQLCKL	F	Acetylation (Protein N-term); Oxidation (M); ethanolamine (DE); Carbamidomethylation; acetyl-d3 (K)	Q13151	1267.6	9
1769	M(+42.01)(+15.99)E(+43.04)PAE(+43.04)QPSE(+43.04)LVSAE(+43.04)G	-	-	MEPAEQPSELVSAEG	R	Acetylation (Protein N-term); Oxidation (M); ethanolamine (DE); ethanolamine (DE); ethanolamine (DE); more	P47224	1802.87	15
1770	M(+42.01)(+15.99)E(+43.04)PAE(+43.04)QPSE(+43.04)LVSAE(+43.04)GRN	-	-	MEPAEQPSELVSAEGRN	R	Acetylation (Protein N-term); Oxidation (M); ethanolamine (DE); ethanolamine (DE); ethanolamine (DE); more	P47224	2073.02	17
1771	M(+42.01)(+15.99)E(+43.04)PAGPC(+57.02)GFC(+57.02)PAGE(+43.04)VQPA	-	-	MEPAGPCGFCPAGEVQPA	R	Acetylation (Protein N-term); Oxidation (M); ethanolamine (DE); Carbamidomethylation; Carbamidomethylation; more	Q9UHR6	2017.87	18
1772	M(+42.01)(+15.99)E(+43.04)PAVSE(+43.04)PM	-	-	MEPAVSEPM	R	Acetylation (Protein N-term); Oxidation (M); ethanolamine (DE); ethanolamine (DE)	Q15738	1133.51	9
1773	M(+42.01)(+15.99)E(+43.04)PAVSE(+43.04)PM(+15.99)	-	-	MEPAVSEPM	R	Acetylation (Protein N-term); Oxidation (M); ethanolamine (DE); ethanolamine (DE); Oxidation (M)	Q15738	1149.5	9
1774	M(+42.01)(+15.99)E(+43.04)PGPD(+43.04)GPAASGPAAI	-	-	MEPGPDGPAASGPAAI	R	Acetylation (Protein N-term); Oxidation (M); ethanolamine (DE); ethanolamine (DE)	P19623	1580.75	16
1775	M(+42.01)(+15.99)E(+43.04)PGPDGPAASGPAAI	-	-	MEPGPDGPAASGPAAI	R	Acetylation (Protein N-term); Oxidation (M); ethanolamine (DE)	P19623	1537.71	16
1776	M(+42.01)(+15.99)E(+43.04)PLK(+45.03)VE(+43.04)K(+45.03)FATAK(+45.03)	-	-	MEPLKVEKFATAK	R	Acetylation (Protein N-term); Oxidation (M); ethanolamine (DE); acetyl-d3 (K); ethanolamine (DE); more	Q9H7B4	1769.99	13
1777	M(+42.01)(+15.99)E(+43.04)PPGGSLGPG	-	-	MEPPGGSLGPG	R	Acetylation (Protein N-term); Oxidation (M); ethanolamine (DE)	O60610	1098.5	11
1778	M(+42.01)(+15.99)E(+43.04)PPGGSLGPGRGT	-	-	MEPPGGSLGPGRGT	R	Acetylation (Protein N-term); Oxidation (M); ethanolamine (DE)	O60610	1412.67	14
1779	M(+42.01)(+15.99)E(+43.04)PRPTAPSSGAPGLAGVGE(+43.04)TPSAA	-	-	MEPRPTAPSSGAPGLAGVGETPSAA	A	Acetylation (Protein N-term); Oxidation (M); ethanolamine (DE); ethanolamine (DE)	P55011	2451.21	25
1780	M(+42.01)(+15.99)E(+43.04)PSSK(+45.03)K(+45.03)LTG	-	-	MEPSSKKLTG	R	Acetylation (Protein N-term); Oxidation (M); ethanolamine (DE); acetyl-d3 (K); acetyl-d3 (K)	P11166	1267.66	10
1781	M(+42.01)(+15.99)E(+43.04)PSSLE(+43.04)LPAD(+43.04)TVQ	-	-	MEPSSLELPADTVQ	R	Acetylation (Protein N-term); Oxidation (M); ethanolamine (DE); ethanolamine (DE); ethanolamine (DE)	Q16719	1702.84	14
1782	M(+42.01)(+15.99)E(+43.04)PSSLE(+43.04)LPADTVQ	-	-	MEPSSLELPADTVQ	R	Acetylation (Protein N-term); Oxidation (M); ethanolamine (DE); ethanolamine (DE)	Q16719	1659.8	14
1783	M(+42.01)(+15.99)E(+43.04)PSSLELPAD(+43.04)TVQ	-	-	MEPSSLELPADTVQ	R	Acetylation (Protein N-term); Oxidation (M); ethanolamine (DE); ethanolamine (DE)	Q16719	1659.8	14
1784	M(+42.01)(+15.99)E(+43.04)QVNE(+43.04)LK(+45.03)	-	-	MEQVNELK	E	Acetylation (Protein N-term); Oxidation (M); ethanolamine (DE); ethanolamine (DE); acetyl-d3 (K)	P31948	1178.6	8
1785	M(+42.01)(+15.99)E(+43.04)QVNE(+43.04)LK(+45.03)E(+43.04)K(+45.03)GNK(+45.03)	-	-	MEQVNELKEKGNK	A	Acetylation (Protein N-term); Oxidation (M); ethanolamine (DE); ethanolamine (DE); acetyl-d3 (K); more	P31948	1868	13
1786	M(+42.01)(+15.99)E(+43.04)QVNE(+43.04)LK(+45.03)E(+43.04)K(+45.03)GNK(+45.03)AL	-	-	MEQVNELKEKGNKAL	S	Acetylation (Protein N-term); Oxidation (M); ethanolamine (DE); ethanolamine (DE); acetyl-d3 (K); more	P31948	2052.12	15
1787	M(+42.01)(+15.99)E(+43.04)QVNELK(+45.03)E(+43.04)K(+45.03)GNK(+45.03)AL	-	-	MEQVNELKEKGNKAL	S	Acetylation (Protein N-term); Oxidation (M); ethanolamine (DE); acetyl-d3 (K); ethanolamine (DE); more	P31948	2009.08	15
1788	M(+42.01)(+15.99)E(+43.04)SAGLE(+43.04)QLL	-	-	MESAGLEQLL	R	Acetylation (Protein N-term); Oxidation (M); ethanolamine (DE); ethanolamine (DE)	Q8TEX9	1233.63	10
1789	M(+42.01)(+15.99)E(+43.04)SAIAE(+43.04)GGAS	-	-	MESAIAEGGAS	R	Acetylation (Protein N-term); Oxidation (M); ethanolamine (DE); ethanolamine (DE)	P78344	1165.53	11
1790	M(+42.01)(+15.99)E(+43.04)SGFTSK(+45.03)D(+43.04)TYLSH	-	-	MESGFTSKDTYLSH	F	Acetylation (Protein N-term); Oxidation (M); ethanolamine (DE); acetyl-d3 (K); ethanolamine (DE)	P40261	1790.82	14
1791	M(+42.01)(+15.99)E(+43.04)SGFTSK(+45.03)D(+43.04)TYLSHFNP	-	-	MESGFTSKDTYLSHFNP	R	Acetylation (Protein N-term); Oxidation (M); ethanolamine (DE); acetyl-d3 (K); ethanolamine (DE)	P40261	2148.99	17
1792	M(+42.01)(+15.99)E(+43.04)SGSTAASE(+43.04)E(+43.04)A	-	-	MESGSTAASEEA	R	Acetylation (Protein N-term); Oxidation (M); ethanolamine (DE); ethanolamine (DE); ethanolamine (DE)	P10644	1355.59	12
1793	M(+42.01)(+15.99)E(+43.04)SGSTAASE(+43.04)EA(+43.04)	-	-	MESGSTAASEEA	R	Acetylation (Protein N-term); Oxidation (M); ethanolamine (DE); ethanolamine (DE); ethanolamine (C-term)	P10644	1355.59	12
1794	M(+42.01)(+15.99)E(+43.04)SPASSQPASM(+15.99)PQSK(+45.03)GK(+45.03)SK(+45.03)	-	-	MESPASSQPASMPQSKGKSK	R	Acetylation (Protein N-term); Oxidation (M); ethanolamine (DE); Oxidation (M); acetyl-d3 (K); more	P46734	2314.11	20
1795	M(+42.01)(+15.99)E(+43.04)SPASSQPASMPQSK(+45.03)GK(+45.03)SK(+45.03)	-	-	MESPASSQPASMPQSKGKSK	R	Acetylation (Protein N-term); Oxidation (M); ethanolamine (DE); acetyl-d3 (K); acetyl-d3 (K); more	P46734	2298.12	20
1796	M(+42.01)(+15.99)E(+43.04)SYHK(+45.03)PD(+43.04)	-	-	MESYHKPD	Q	Acetylation (Protein N-term); Oxidation (M); ethanolamine (DE); acetyl-d3 (K); ethanolamine (DE)	P29401	1194.54	8
1797	M(+42.01)(+15.99)E(+43.04)SYHK(+45.03)PD(+43.04)Q	-	-	MESYHKPDQ	Q	Acetylation (Protein N-term); Oxidation (M); ethanolamine (DE); acetyl-d3 (K); ethanolamine (DE)	P29401	1322.6	9
1798	M(+42.01)(+15.99)E(+43.04)SYHK(+45.03)PD(+43.04)QQ	-	-	MESYHKPDQQ	K	Acetylation (Protein N-term); Oxidation (M); ethanolamine (DE); acetyl-d3 (K); ethanolamine (DE)	P29401	1450.66	10
1799	M(+42.01)(+15.99)E(+43.04)SYHK(+45.03)PD(+43.04)QQK(+45.03)	-	-	MESYHKPDQQK	L	Acetylation (Protein N-term); Oxidation (M); ethanolamine (DE); acetyl-d3 (K); ethanolamine (DE); more	P29401	1623.78	11
1800	M(+42.01)(+15.99)E(+43.04)SYHK(+45.03)PD(+43.04)QQK(+45.03)L	-	-	MESYHKPDQQKL	Q	Acetylation (Protein N-term); Oxidation (M); ethanolamine (DE); acetyl-d3 (K); ethanolamine (DE); more	P29401	1736.87	12
1801	M(+42.01)(+15.99)E(+43.04)SYHK(+45.03)PD(+43.04)QQK(+45.03)LQ	-	-	MESYHKPDQQKLQ	A	Acetylation (Protein N-term); Oxidation (M); ethanolamine (DE); acetyl-d3 (K); ethanolamine (DE); more	P29401	1864.93	13
1802	M(+42.01)(+15.99)E(+43.04)SYHK(+45.03)PD(+43.04)QQK(+45.03)LQALK(+45.03)D(+43.04)	-	-	MESYHKPDQQKLQALKD	T	Acetylation (Protein N-term); Oxidation (M); ethanolamine (DE); acetyl-d3 (K); ethanolamine (DE); more	P29401	2380.24	17
1803	M(+42.01)(+15.99)E(+43.04)SYHK(+45.03)PD(+43.04)QQK(+45.03)LQALK(+45.03)D(+43.04)TAN	-	-	MESYHKPDQQKLQALKDTAN	R	Acetylation (Protein N-term); Oxidation (M); ethanolamine (DE); acetyl-d3 (K); ethanolamine (DE); more	P29401	2666.37	20
1804	M(+42.01)(+15.99)E(+43.04)SYHK(+45.03)PD(+43.04)QQK(+45.03)LQALK(+45.03)DTAN	-	-	MESYHKPDQQKLQALKDTAN	R	Acetylation (Protein N-term); Oxidation (M); ethanolamine (DE); acetyl-d3 (K); ethanolamine (DE); more	P29401	2623.33	20
1805	M(+42.01)(+15.99)E(+43.04)SYHK(+45.03)PD(+43.04)QQK(+45.03)LQALK(+45.03)DTAN(+43.04)	-	-	MESYHKPDQQKLQALKDTAN	R	Acetylation (Protein N-term); Oxidation (M); ethanolamine (DE); acetyl-d3 (K); ethanolamine (DE); more	P29401	2666.37	20
1806	M(+42.01)(+15.99)E(+43.04)SYHK(+45.03)PDQ(+43.04)	-	-	MESYHKPDQ	Q	Acetylation (Protein N-term); Oxidation (M); ethanolamine (DE); acetyl-d3 (K); ethanolamine (C-term)	P29401	1322.6	9
1807	M(+42.01)(+15.99)E(+43.04)SYHK(+45.03)PDQQK(+45.03)LQ	-	-	MESYHKPDQQKLQ	A	Acetylation (Protein N-term); Oxidation (M); ethanolamine (DE); acetyl-d3 (K); acetyl-d3 (K)	P29401	1821.88	13
1808	M(+42.01)(+15.99)E(+43.04)SYHK(+45.03)PDQQK(+45.03)LQALK(+45.03)D(+43.04)TAN	-	-	MESYHKPDQQKLQALKDTAN	R	Acetylation (Protein N-term); Oxidation (M); ethanolamine (DE); acetyl-d3 (K); acetyl-d3 (K); more	P29401	2623.33	20
1809	M(+42.01)(+15.99)E(+43.04)SYHK(+45.03)PDQQK(+45.03)LQALK(+45.03)DTAN(+43.04)	-	-	MESYHKPDQQKLQALKDTAN	R	Acetylation (Protein N-term); Oxidation (M); ethanolamine (DE); acetyl-d3 (K); acetyl-d3 (K); more	P29401	2623.33	20
1810	M(+42.01)(+15.99)E(+43.04)TAPK(+45.03)PGK(+45.03)D(+43.04)VPPK(+45.03)K(+45.03)D(+43.04)K(+45.03)LQTK(+45.03)	-	-	METAPKPGKDVPPKKDKLQTK	R	Acetylation (Protein N-term); Oxidation (M); ethanolamine (DE); acetyl-d3 (K); acetyl-d3 (K); more	O15213	2792.6	21
1811	M(+42.01)(+15.99)E(+43.04)TE(+43.04)QPE(+43.04)E(+43.04)TFPNT	-	-	METEQPEETFPNT	E	Acetylation (Protein N-term); Oxidation (M); ethanolamine (DE); ethanolamine (DE); ethanolamine (DE); more	P61978	1781.81	13
1812	M(+42.01)(+15.99)E(+43.04)TGTAPLVAPP	-	-	METGTAPLVAPP	R	Acetylation (Protein N-term); Oxidation (M); ethanolamine (DE)	Q4KMP7	1283.64	12
1813	M(+42.01)(+15.99)E(+43.04)TGTAPLVAPPR	-	-	METGTAPLVAPPR	R	Acetylation (Protein N-term); Oxidation (M); ethanolamine (DE)	Q4KMP7	1439.74	13
1814	M(+42.01)(+15.99)E(+43.04)TILE(+43.04)QQ	-	-	METILEQQ	R	Acetylation (Protein N-term); Oxidation (M); ethanolamine (DE); ethanolamine (DE)	Q12874	1134.56	8
1815	M(+42.01)(+15.99)E(+43.04)TM(+15.99)ASPGK(+45.03)D(+43.04)NY	-	-	METMASPGKDNY	R	Acetylation (Protein N-term); Oxidation (M); ethanolamine (DE); Oxidation (M); acetyl-d3 (K); more	O60684	1547.67	12
1816	M(+42.01)(+15.99)E(+43.04)TMASPGK(+45.03)D(+43.04)NY	-	-	METMASPGKDNY	R	Acetylation (Protein N-term); Oxidation (M); ethanolamine (DE); acetyl-d3 (K); ethanolamine (DE)	O60684	1531.67	12
1817	M(+42.01)(+15.99)E(+43.04)VAANC(+57.02)SL	-	-	MEVAANCSL	R	Acetylation (Protein N-term); Oxidation (M); ethanolamine (DE); Carbamidomethylation	Q96RS6	1094.47	9
1818	M(+42.01)(+15.99)E(+43.04)VK(+45.03)GK(+45.03)K(+45.03)QFTGK(+45.03)STK(+45.03)TAQE(+43.04)K(+45.03)N	-	-	MEVKGKKQFTGKSTKTAQEKN	R	Acetylation (Protein N-term); Oxidation (M); ethanolamine (DE); acetyl-d3 (K); acetyl-d3 (K); more	Q15397	2781.52	21
1819	M(+42.01)(+15.99)E(+43.04)VK(+45.03)PPPG	-	-	MEVKPPPG	R	Acetylation (Protein N-term); Oxidation (M); ethanolamine (DE); acetyl-d3 (K)	P51991	999.514	8
1820	M(+42.01)(+15.99)E(+43.04)VK(+45.03)PPPGRPQPD(+43.04)	-	-	MEVKPPPGRPQPD	S	Acetylation (Protein N-term); Oxidation (M); ethanolamine (DE); acetyl-d3 (K); ethanolamine (DE)	P51991	1635.85	13
1821	M(+42.01)(+15.99)E(+43.04)VK(+45.03)PPPGRPQPD(+43.04)SG	-	-	MEVKPPPGRPQPDSG	R	Acetylation (Protein N-term); Oxidation (M); ethanolamine (DE); acetyl-d3 (K); ethanolamine (DE)	P51991	1779.9	15
1822	M(+42.01)(+15.99)E(+43.04)VK(+45.03)PPPGRPQPD(+43.04)SGRR	-	-	MEVKPPPGRPQPDSGRR	R	Acetylation (Protein N-term); Oxidation (M); ethanolamine (DE); acetyl-d3 (K); ethanolamine (DE)	P51991	2092.1	17
1823	M(+42.01)(+15.99)E(+43.04)VK(+45.03)PPPGRPQPDSG	-	-	MEVKPPPGRPQPDSG	R	Acetylation (Protein N-term); Oxidation (M); ethanolamine (DE); acetyl-d3 (K)	P51991	1736.86	15
1824	M(+42.01)(+15.99)E(+43.04)VK(+45.03)PPPGRPQPDSG(+43.04)	-	-	MEVKPPPGRPQPDSG	R	Acetylation (Protein N-term); Oxidation (M); ethanolamine (DE); acetyl-d3 (K); ethanolamine (C-term)	P51991	1779.9	15
1825	M(+42.01)(+15.99)E(+43.04)VK(+45.03)PPPGRPQPDSGR(+43.04)	-	-	MEVKPPPGRPQPDSGR	R	Acetylation (Protein N-term); Oxidation (M); ethanolamine (DE); acetyl-d3 (K); ethanolamine (C-term)	P51991	1936	16
1826	M(+42.01)(+15.99)E(+43.04)VLAAE(+43.04)TTSQQE(+43.04)	-	-	MEVLAAETTSQQE	R	Acetylation (Protein N-term); Oxidation (M); ethanolamine (DE); ethanolamine (DE); ethanolamine (DE)	O75781	1622.78	13
1827	M(+42.01)(+15.99)E(+43.04)VTGD(+43.04)AGVPE(+43.04)SGE(+43.04)I	-	-	MEVTGDAGVPESGEI	R	Acetylation (Protein N-term); Oxidation (M); ethanolamine (DE); ethanolamine (DE); ethanolamine (DE); more	O00273	1719.83	15
1828	M(+42.01)(+15.99)E(+43.04)VTGD(+43.04)AGVPE(+43.04)SGEI(+43.04)	-	-	MEVTGDAGVPESGEI	R	Acetylation (Protein N-term); Oxidation (M); ethanolamine (DE); ethanolamine (DE); ethanolamine (DE); more	O00273	1719.83	15
1829	M(+42.01)(+15.99)E(+43.04)YM(+15.99)AE(+43.04)STD(+43.04)	-	-	MEYMAESTD	R	Acetylation (Protein N-term); Oxidation (M); ethanolamine (DE); Oxidation (M); ethanolamine (DE); more	Q96D46	1278.51	9
1830	M(+42.01)(+15.99)ED(+43.04)SM(+15.99)D(+43.04)M(+15.99)D(+43.04)MSPL	-	-	MEDSMDMDMSPL	R	Acetylation (Protein N-term); Oxidation (M); ethanolamine (DE); Oxidation (M); ethanolamine (DE); more	P06748	1619.62	12
1831	M(+42.01)(+15.99)ED(+43.04)SM(+15.99)D(+43.04)M(+15.99)DM(+15.99)SPL	-	-	MEDSMDMDMSPL	R	Acetylation (Protein N-term); Oxidation (M); ethanolamine (DE); Oxidation (M); ethanolamine (DE); more	P06748	1592.57	12
1832	M(+42.01)(+15.99)ED(+43.04)SM(+15.99)D(+43.04)MD(+43.04)M(+15.99)SPL	-	-	MEDSMDMDMSPL	R	Acetylation (Protein N-term); Oxidation (M); ethanolamine (DE); Oxidation (M); ethanolamine (DE); more	P06748	1619.62	12
1833	M(+42.01)(+15.99)ED(+43.04)SM(+15.99)D(+43.04)MD(+43.04)MSPL	-	-	MEDSMDMDMSPL	R	Acetylation (Protein N-term); Oxidation (M); ethanolamine (DE); Oxidation (M); ethanolamine (DE); more	P06748	1603.62	12
1834	M(+42.01)(+15.99)ED(+43.04)SM(+15.99)DM(+15.99)D(+43.04)M(+15.99)SPL	-	-	MEDSMDMDMSPL	R	Acetylation (Protein N-term); Oxidation (M); ethanolamine (DE); Oxidation (M); Oxidation (M); more	P06748	1592.57	12
1835	M(+42.01)(+15.99)ED(+43.04)SMD(+43.04)M(+15.99)D(+43.04)M(+15.99)SPL	-	-	MEDSMDMDMSPL	R	Acetylation (Protein N-term); Oxidation (M); ethanolamine (DE); ethanolamine (DE); Oxidation (M); more	P06748	1619.62	12
1836	M(+42.01)(+15.99)ED(+43.04)SMD(+43.04)MD(+43.04)M(+15.99)SPL	-	-	MEDSMDMDMSPL	R	Acetylation (Protein N-term); Oxidation (M); ethanolamine (DE); ethanolamine (DE); ethanolamine (DE); more	P06748	1603.62	12
1837	M(+42.01)(+15.99)EDSM(+15.99)D(+43.04)M(+15.99)D(+43.04)M(+15.99)SPL	-	-	MEDSMDMDMSPL	R	Acetylation (Protein N-term); Oxidation (M); Oxidation (M); ethanolamine (DE); Oxidation (M); more	P06748	1592.57	12
1838	M(+42.01)(+15.99)EDSM(+15.99)D(+43.04)M(+15.99)D(+43.04)MSPL	-	-	MEDSMDMDMSPL	R	Acetylation (Protein N-term); Oxidation (M); Oxidation (M); ethanolamine (DE); Oxidation (M); more	P06748	1576.58	12
1839	M(+42.01)(+15.99)EDSM(+15.99)D(+43.04)MD(+43.04)M(+15.99)SPL	-	-	MEDSMDMDMSPL	R	Acetylation (Protein N-term); Oxidation (M); Oxidation (M); ethanolamine (DE); ethanolamine (DE); more	P06748	1576.58	12
1840	M(+42.01)(+15.99)EDSMD(+43.04)M(+15.99)D(+43.04)M(+15.99)SPL	-	-	MEDSMDMDMSPL	R	Acetylation (Protein N-term); Oxidation (M); ethanolamine (DE); Oxidation (M); ethanolamine (DE); more	P06748	1576.58	12
1841	M(+42.01)(+15.99)EGPLSVFGD(+43.04)RSTGE(+43.04)TI	-	-	MEGPLSVFGDRSTGETI	R	Acetylation (Protein N-term); Oxidation (M); ethanolamine (DE); ethanolamine (DE)	P17987	1938.94	17
1842	M(+42.01)(+15.99)EGVE(+43.04)E(+43.04)K(+45.03)K(+45.03)K(+45.03)	-	-	MEGVEEKKK	E	Acetylation (Protein N-term); Oxidation (M); ethanolamine (DE); ethanolamine (DE); acetyl-d3 (K); more	P18124	1355.73	9
1843	M(+42.01)(+15.99)EGVE(+43.04)E(+43.04)K(+45.03)K(+45.03)K(+45.03)E(+43.04)VPAVPE(+43.04)TLK(+45.03)K(+45.03)K(+45.03)	-	-	MEGVEEKKKEVPAVPETLKKK	R	Acetylation (Protein N-term); Oxidation (M); ethanolamine (DE); ethanolamine (DE); acetyl-d3 (K); more	P18124	2896.69	21
1844	M(+42.01)(+15.99)EK(+45.03)TLE(+43.04)TVPLE(+43.04)	-	-	MEKTLETVPLE	R	Acetylation (Protein N-term); Oxidation (M); acetyl-d3 (K); ethanolamine (DE); ethanolamine (DE)	P22626	1477.78	11
1845	M(+42.01)(+15.99)EPSSLE(+43.04)LPAD(+43.04)TVQ	-	-	MEPSSLELPADTVQ	R	Acetylation (Protein N-term); Oxidation (M); ethanolamine (DE); ethanolamine (DE)	Q16719	1659.8	14
1846	M(+42.01)(+15.99)ERGGGGSGTGS	-	-	MERGGGGSGTGS	R	Acetylation (Protein N-term); Oxidation (M)	Q96T17	1109.44	12
1847	M(+42.01)(+15.99)ESYHK(+45.03)PD(+43.04)QQK(+45.03)LQ	-	-	MESYHKPDQQKLQ	A	Acetylation (Protein N-term); Oxidation (M); acetyl-d3 (K); ethanolamine (DE); acetyl-d3 (K)	P29401	1821.88	13
1848	M(+42.01)(+15.99)ESYHK(+45.03)PD(+43.04)QQK(+45.03)LQALK(+45.03)D(+43.04)TAN	-	-	MESYHKPDQQKLQALKDTAN	R	Acetylation (Protein N-term); Oxidation (M); acetyl-d3 (K); ethanolamine (DE); acetyl-d3 (K); more	P29401	2623.33	20
1849	M(+42.01)(+15.99)ESYHK(+45.03)PD(+43.04)QQK(+45.03)LQALK(+45.03)DTAN(+43.04)	-	-	MESYHKPDQQKLQALKDTAN	R	Acetylation (Protein N-term); Oxidation (M); acetyl-d3 (K); ethanolamine (DE); acetyl-d3 (K); more	P29401	2623.33	20
1850	M(+42.01)(+15.99)EVK(+45.03)PPPGRPQPD(+43.04)SG	-	-	MEVKPPPGRPQPDSG	R	Acetylation (Protein N-term); Oxidation (M); acetyl-d3 (K); ethanolamine (DE)	P51991	1736.86	15
1851	M(+42.01)(+15.99)EVK(+45.03)PPPGRPQPDSG(+43.04)	-	-	MEVKPPPGRPQPDSG	R	Acetylation (Protein N-term); Oxidation (M); acetyl-d3 (K); ethanolamine (C-term)	P51991	1736.86	15
1852	M(+42.01)(+15.99)FE(+43.04)E(+43.04)K(+45.03)ASSPSGK(+45.03)M(+15.99)GG	-	-	MFEEKASSPSGKMGG	E	Acetylation (Protein N-term); Oxidation (M); ethanolamine (DE); ethanolamine (DE); acetyl-d3 (K); more	P26639	1791.83	15
1853	M(+42.01)(+15.99)FE(+43.04)E(+43.04)K(+45.03)ASSPSGK(+45.03)M(+15.99)GGE(+43.04)	-	-	MFEEKASSPSGKMGGE	E	Acetylation (Protein N-term); Oxidation (M); ethanolamine (DE); ethanolamine (DE); acetyl-d3 (K); more	P26639	1963.91	16
1854	M(+42.01)(+15.99)FLVNSFLK(+45.03)GG	-	-	MFLVNSFLKGG	G	Acetylation (Protein N-term); Oxidation (M); acetyl-d3 (K)	P04632	1314.67	11
1855	M(+42.01)(+15.99)FQLPVNNLGSL	-	-	MFQLPVNNLGSL	R	Acetylation (Protein N-term); Oxidation (M)	Q9H2P0	1389.7	12
1856	M(+42.01)(+15.99)FQVPD(+43.04)SE(+43.04)GG	-	-	MFQVPDSEGG	R	Acetylation (Protein N-term); Oxidation (M); ethanolamine (DE); ethanolamine (DE)	Q9H910	1209.53	10
1857	M(+42.01)(+15.99)FRTAVM(+15.99)MA(+43.04)	-	-	MFRTAVMMA	A	Acetylation (Protein N-term); Oxidation (M); Oxidation (M); ethanolamine (C-term)	Q86TM6	1173.53	9
1858	M(+42.01)(+15.99)FSALK(+45.03)K(+45.03)LVGSD(+43.04)QAPG	-	-	MFSALKKLVGSDQAPG	R	Acetylation (Protein N-term); Oxidation (M); acetyl-d3 (K); acetyl-d3 (K); ethanolamine (DE)	Q3YEC7	1838.97	16
1859	M(+42.01)(+15.99)FSE(+43.04)QAAQ	-	-	MFSEQAAQ	R	Acetylation (Protein N-term); Oxidation (M); ethanolamine (DE)	P49005	1011.43	8
1860	M(+42.01)(+15.99)FSFNM(+15.99)FDHPIP(+43.04)	-	-	MFSFNMFDHPIP	R	Acetylation (Protein N-term); Oxidation (M); Oxidation (M); ethanolamine (C-term)	Q92890	1598.69	12
1861	M(+42.01)(+15.99)FSSSAK(+45.03)IVK(+45.03)PNG	-	-	MFSSSAKIVKPNG	E	Acetylation (Protein N-term); Oxidation (M); acetyl-d3 (K); acetyl-d3 (K)	P62081	1512.78	13
1862	M(+42.01)(+15.99)FSWVSK(+45.03)D(+43.04)A	-	-	MFSWVSKDA	R	Acetylation (Protein N-term); Oxidation (M); acetyl-d3 (K); ethanolamine (DE)	Q9H4M9	1215.57	9
1863	M(+42.01)(+15.99)FSWVSK(+45.03)D(+43.04)AR	-	-	MFSWVSKDAR	R	Acetylation (Protein N-term); Oxidation (M); acetyl-d3 (K); ethanolamine (DE)	Q9H4M9	1371.67	10
1864	M(+42.01)(+15.99)FSWVSK(+45.03)DA(+43.04)	-	-	MFSWVSKDA	R	Acetylation (Protein N-term); Oxidation (M); acetyl-d3 (K); ethanolamine (C-term)	Q9H4M9	1215.57	9
1865	M(+42.01)(+15.99)FSWVSK(+45.03)DAR	-	-	MFSWVSKDAR	R	Acetylation (Protein N-term); Oxidation (M); acetyl-d3 (K)	Q9H4M9	1328.63	10
1866	M(+42.01)(+15.99)FSWVSK(+45.03)DAR(+43.04)	-	-	MFSWVSKDAR	R	Acetylation (Protein N-term); Oxidation (M); acetyl-d3 (K); ethanolamine (C-term)	Q9H4M9	1371.67	10
1867	M(+42.01)(+15.99)GILEK(+45.03)ISEIE(+43.04)K(+45.03)EIA	-	-	MGILEKISEIEKEIA	R	Acetylation (Protein N-term); Oxidation (M); acetyl-d3 (K); ethanolamine (DE); acetyl-d3 (K)	P55039	1893.03	15
1868	M(+42.01)(+15.99)GPAPAGE(+43.04)QL	-	-	MGPAPAGEQL	R	Acetylation (Protein N-term); Oxidation (M); ethanolamine (DE)	Q9H6R4	1070.51	10
1869	M(+42.01)(+15.99)HGGGPPSGD(+43.04)SAC(+57.02)PL	-	-	MHGGGPPSGDSACPL	R	Acetylation (Protein N-term); Oxidation (M); ethanolamine (DE); Carbamidomethylation	P24928	1539.64	15
1870	M(+42.01)(+15.99)HK(+45.03)LK(+45.03)SSQK(+45.03)D(+43.04)K(+45.03)V	-	-	MHKLKSSQKDKV	R	Acetylation (Protein N-term); Oxidation (M); acetyl-d3 (K); acetyl-d3 (K); acetyl-d3 (K); more	Q6PH85	1708.96	12
1871	M(+42.01)(+15.99)HPAGLAAAAAGTP	-	-	MHPAGLAAAAAGTP	R	Acetylation (Protein N-term); Oxidation (M)	Q5BJH7	1292.62	14
1872	M(+42.01)(+15.99)HQPPE(+43.04)STAAAAAAAD(+43.04)ISA	-	-	MHQPPESTAAAAAAADISA	R	Acetylation (Protein N-term); Oxidation (M); ethanolamine (DE); ethanolamine (DE)	Q15714	1952.93	19
1873	M(+42.01)(+15.99)HSLATAAPVPTTLAQVD(+43.04)	-	-	MHSLATAAPVPTTLAQVD	R	Acetylation (Protein N-term); Oxidation (M); ethanolamine (DE)	Q92600	1922.98	18
1874	M(+42.01)(+15.99)HTGGE(+43.04)TSAC(+57.02)K(+45.03)PSSV	-	-	MHTGGETSACKPSSV	R	Acetylation (Protein N-term); Oxidation (M); ethanolamine (DE); Carbamidomethylation; acetyl-d3 (K)	Q13627	1693.75	15
1875	M(+42.01)(+15.99)IK(+45.03)K(+45.03)FD(+43.04)K(+45.03)K(+45.03)D(+43.04)	-	-	MIKKFDKKD	E	Acetylation (Protein N-term); Oxidation (M); acetyl-d3 (K); acetyl-d3 (K); ethanolamine (DE); more	Q9UBF2	1475.84	9
1876	M(+42.01)(+15.99)IK(+45.03)K(+45.03)FD(+43.04)K(+45.03)K(+45.03)D(+43.04)E(+43.04)	-	-	MIKKFDKKDE	E	Acetylation (Protein N-term); Oxidation (M); acetyl-d3 (K); acetyl-d3 (K); ethanolamine (DE); more	Q9UBF2	1647.93	10
1877	M(+42.01)(+15.99)IK(+45.03)K(+45.03)FD(+43.04)K(+45.03)K(+45.03)DE(+43.04)(+43.04)	-	-	MIKKFDKKDE	E	Acetylation (Protein N-term); Oxidation (M); acetyl-d3 (K); acetyl-d3 (K); ethanolamine (DE); more	Q9UBF2	1647.93	10
1878	M(+42.01)(+15.99)IK(+45.03)LFSLK(+45.03)QQK(+45.03)K(+45.03)	-	-	MIKLFSLKQQKK	E	Acetylation (Protein N-term); Oxidation (M); acetyl-d3 (K); acetyl-d3 (K); acetyl-d3 (K); more	P61081	1729.02	12
1879	M(+42.01)(+15.99)IK(+45.03)LFSLK(+45.03)QQK(+45.03)K(+45.03)E(+43.04)	-	-	MIKLFSLKQQKKE	E	Acetylation (Protein N-term); Oxidation (M); acetyl-d3 (K); acetyl-d3 (K); acetyl-d3 (K); more	P61081	1901.11	13
1880	M(+42.01)(+15.99)IK(+45.03)LFSLK(+45.03)QQK(+45.03)K(+45.03)E(+43.04)E(+43.04)E(+43.04)SAGGTK(+45.03)GSSK(+45.03)K(+45.03)ASAAQL	-	-	MIKLFSLKQQKKEEESAGGTKGSSKKASAAQL	R	Acetylation (Protein N-term); Oxidation (M); acetyl-d3 (K); acetyl-d3 (K); acetyl-d3 (K); more	P61081	3910.18	32
1881	M(+42.01)(+15.99)ISAAQLLD(+43.04)E(+43.04)LM(+15.99)GRD(+43.04)	-	-	MISAAQLLDELMGRD	R	Acetylation (Protein N-term); Oxidation (M); ethanolamine (DE); ethanolamine (DE); Oxidation (M); more	O95232	1864.94	15
1882	M(+42.01)(+15.99)ISAAQLLD(+43.04)E(+43.04)LMGRD(+43.04)	-	-	MISAAQLLDELMGRD	R	Acetylation (Protein N-term); Oxidation (M); ethanolamine (DE); ethanolamine (DE); ethanolamine (DE)	O95232	1848.94	15
1883	M(+42.01)(+15.99)ISAAQLLDE(+43.04)LM(+15.99)GRD(+43.04)	-	-	MISAAQLLDELMGRD	R	Acetylation (Protein N-term); Oxidation (M); ethanolamine (DE); Oxidation (M); ethanolamine (DE)	O95232	1821.9	15
1884	M(+42.01)(+15.99)K(+45.03)AVK(+45.03)SE(+43.04)	-	-	MKAVKSE	R	Acetylation (Protein N-term); Oxidation (M); acetyl-d3 (K); acetyl-d3 (K); ethanolamine (DE)	Q8TAD8	982.528	7
1885	M(+42.01)(+15.99)K(+45.03)E(+43.04)E(+43.04)K(+45.03)EHRPK(+45.03)E(+43.04)K(+45.03)	-	-	MKEEKEHRPKEK	R	Acetylation (Protein N-term); Oxidation (M); acetyl-d3 (K); ethanolamine (DE); ethanolamine (DE); more	Q9BZI7	1935.06	12
1886	M(+42.01)(+15.99)K(+45.03)FNPFVTSD(+43.04)RSK(+45.03)N	-，-	-，-	MKFNPFVTSDRSKN	R，R	Acetylation (Protein N-term); Oxidation (M); acetyl-d3 (K); ethanolamine (DE); acetyl-d3 (K)	P61254，Q9UNX3	1860.93	14
1887	M(+42.01)(+15.99)K(+45.03)GK(+45.03)E(+43.04)E(+43.04)K(+45.03)E(+43.04)GGA	-	-	MKGKEEKEGGA	R	Acetylation (Protein N-term); Oxidation (M); acetyl-d3 (K); acetyl-d3 (K); ethanolamine (DE); more	Q9UNE7	1484.79	11
1888	M(+42.01)(+15.99)K(+45.03)K(+45.03)FFD(+43.04)SR	-	-	MKKFFDSR	R	Acetylation (Protein N-term); Oxidation (M); acetyl-d3 (K); acetyl-d3 (K); ethanolamine (DE)	Q2M2I8	1248.64	8
1889	M(+42.01)(+15.99)K(+45.03)K(+45.03)SYSGGT	-	-	MKKSYSGGT	R	Acetylation (Protein N-term); Oxidation (M); acetyl-d3 (K); acetyl-d3 (K)	Q9UHD8	1105.52	9
1890	M(+42.01)(+15.99)K(+45.03)PSIAEMLH	-	-	MKPSIAEMLH	R	Acetylation (Protein N-term); Oxidation (M); acetyl-d3 (K)	O94933	1258.61	10
1891	M(+42.01)(+15.99)K(+45.03)SAASSRGGGGGG(+43.04)	-	-	MKSAASSRGGGGGG	R	Acetylation (Protein N-term); Oxidation (M); acetyl-d3 (K); ethanolamine (C-term)	A6NHQ2	1324.62	14
1892	M(+42.01)(+15.99)K(+45.03)SLK(+45.03)AK(+45.03)F	-	-	MKSLKAKF	R	Acetylation (Protein N-term); Oxidation (M); acetyl-d3 (K); acetyl-d3 (K); acetyl-d3 (K)	Q9P0K7	1144.65	8
1893	M(+42.01)(+15.99)K(+45.03)SPD(+43.04)E(+43.04)VL	-	-	MKSPDEVL	R	Acetylation (Protein N-term); Oxidation (M); acetyl-d3 (K); ethanolamine (DE); ethanolamine (DE)	Q53GA4	1106.57	8
1894	M(+42.01)(+15.99)K(+45.03)SSVAQIK(+45.03)PSSGHD(+43.04)	-	-	MKSSVAQIKPSSGHD	R	Acetylation (Protein N-term); Oxidation (M); acetyl-d3 (K); acetyl-d3 (K); ethanolamine (DE)	Q9HCG8	1761.88	15
1895	M(+42.01)(+15.99)LD(+43.04)HK(+45.03)D(+43.04)LE(+43.04)AE(+43.04)IHPLK(+45.03)NEE(+43.04)(+43.04)	-	-	MLDHKDLEAEIHPLKNEE	R	Acetylation (Protein N-term); Oxidation (M); ethanolamine (DE); acetyl-d3 (K); ethanolamine (DE); more	Q9H0X4	2566.37	18
1896	M(+42.01)(+15.99)LE(+43.04)E(+43.04)LE(+43.04)C(+57.02)GAPGA	-	-	MLEELECGAPGA	R	Acetylation (Protein N-term); Oxidation (M); ethanolamine (DE); ethanolamine (DE); ethanolamine (DE); more	Q13111	1462.68	12
1897	M(+42.01)(+15.99)LGAPDE(+43.04)SSV(+43.04)	-	-	MLGAPDESSV	R	Acetylation (Protein N-term); Oxidation (M); ethanolamine (DE); ethanolamine (C-term)	Q7Z4S6	1148.54	10
1898	M(+42.01)(+15.99)LGPE(+43.04)GGE(+43.04)GFVVK(+45.03)L	-	M	MLGPEGGEGFVVKL	R	Acetylation (Protein N-term); Oxidation (M); ethanolamine (DE); ethanolamine (DE); acetyl-d3 (K)	P52597	1620.86	14
1899	M(+42.01)(+15.99)LGPE(+43.04)GGEGFVVK(+45.03)L	-	M	MLGPEGGEGFVVKL	R	Acetylation (Protein N-term); Oxidation (M); ethanolamine (DE); acetyl-d3 (K)	P52597	1577.82	14
1900	M(+42.01)(+15.99)LGPEGGE(+43.04)GFVVK(+45.03)L	-	M	MLGPEGGEGFVVKL	R	Acetylation (Protein N-term); Oxidation (M); ethanolamine (DE); acetyl-d3 (K)	P52597	1577.82	14
1901	M(+42.01)(+15.99)LGSGFK(+45.03)AE(+43.04)	-	-	MLGSGFKAE	R	Acetylation (Protein N-term); Oxidation (M); acetyl-d3 (K); ethanolamine (DE)	P53990	1084.53	9
1902	M(+42.01)(+15.99)LGTE(+43.04)GGE(+43.04)GFVVK(+45.03)V	-	M	MLGTEGGEGFVVKV	R	Acetylation (Protein N-term); Oxidation (M); ethanolamine (DE); ethanolamine (DE); acetyl-d3 (K)	P31943	1610.84	14
1903	M(+42.01)(+15.99)LK(+45.03)AVILIGGPQK(+45.03)GT	-	-	MLKAVILIGGPQKGT	R	Acetylation (Protein N-term); Oxidation (M); acetyl-d3 (K); acetyl-d3 (K)	Q96IJ6	1672.97	15
1904	M(+42.01)(+15.99)LK(+45.03)AVLK(+45.03)K(+45.03)S	-	-	MLKAVLKKS	R	Acetylation (Protein N-term); Oxidation (M); acetyl-d3 (K); acetyl-d3 (K); acetyl-d3 (K)	Q9C0D5	1209.74	9
1905	M(+42.01)(+15.99)LK(+45.03)C(+57.02)IPLW	-	-	MLKCIPLW	R	Acetylation (Protein N-term); Oxidation (M); acetyl-d3 (K); Carbamidomethylation	Q14160	1162.6	8
1906	M(+42.01)(+15.99)LK(+45.03)K(+45.03)FD(+43.04)K(+45.03)K(+45.03)D(+43.04)	-	-	MLKKFDKKD	E	Acetylation (Protein N-term); Oxidation (M); acetyl-d3 (K); acetyl-d3 (K); ethanolamine (DE); more	Q9Y678	1475.84	9
1907	M(+42.01)(+15.99)LK(+45.03)K(+45.03)FD(+43.04)K(+45.03)K(+45.03)D(+43.04)E(+43.04)	-	-	MLKKFDKKDE	E	Acetylation (Protein N-term); Oxidation (M); acetyl-d3 (K); acetyl-d3 (K); ethanolamine (DE); more	Q9Y678	1647.93	10
1908	M(+42.01)(+15.99)LK(+45.03)K(+45.03)FD(+43.04)K(+45.03)K(+45.03)DE(+43.04)(+43.04)	-	-	MLKKFDKKDE	E	Acetylation (Protein N-term); Oxidation (M); acetyl-d3 (K); acetyl-d3 (K); ethanolamine (DE); more	Q9Y678	1647.93	10
1909	M(+42.01)(+15.99)LK(+45.03)PQPLQQPSQPQQPPPTQQAVA	-	-	MLKPQPLQQPSQPQQPPPTQQAVA	R	Acetylation (Protein N-term); Oxidation (M); acetyl-d3 (K)	Q8WWM7	2739.41	24
1910	M(+42.01)(+15.99)LK(+45.03)SK(+45.03)TFLK(+45.03)K(+45.03)T	-	-	MLKSKTFLKKT	R	Acetylation (Protein N-term); Oxidation (M); acetyl-d3 (K); acetyl-d3 (K); acetyl-d3 (K); more	Q9Y2L1	1561.92	11
1911	M(+42.01)(+15.99)LLFVEQVASK(+45.03)G	-	-	MLLFVEQVASKG	T	Acetylation (Protein N-term); Oxidation (M); acetyl-d3 (K)	Q71RC2	1423.75	12
1912	M(+42.01)(+15.99)LPPQPSAAHQG	-	-	MLPPQPSAAHQG	R	Acetylation (Protein N-term); Oxidation (M)	Q9C0J1	1290.6	12
1913	M(+42.01)(+15.99)LSGK(+45.03)K(+45.03)AAAAAAAAAAAATGTE(+43.04)AGPGTAGGS(+43.04)	-	-	MLSGKKAAAAAAAAAAAATGTEAGPGTAGGS	E	Acetylation (Protein N-term); Oxidation (M); acetyl-d3 (K); acetyl-d3 (K); ethanolamine (DE); more	O60341	2792.42	31
1914	M(+42.01)(+15.99)LTC(+57.02)NK(+45.03)AGS	-	-	MLTCNKAGS	R	Acetylation (Protein N-term); Oxidation (M); Carbamidomethylation; acetyl-d3 (K)	Q13362	1083.48	9
1915	M(+42.01)(+15.99)LTLASK(+45.03)LK(+45.03)	-	-	MLTLASKLK	R	Acetylation (Protein N-term); Oxidation (M); acetyl-d3 (K); acetyl-d3 (K)	Q969M7	1151.67	9
1916	M(+42.01)(+15.99)M(+15.99)C(+57.02)GAPSATQPATA	-	-	MMCGAPSATQPATA	E	Acetylation (Protein N-term); Oxidation (M); Oxidation (M); Carbamidomethylation	P04080	1466.58	14
1917	M(+42.01)(+15.99)M(+15.99)C(+57.02)GAPSATQPATAE(+43.04)TQ	-	-	MMCGAPSATQPATAETQ	H	Acetylation (Protein N-term); Oxidation (M); Oxidation (M); Carbamidomethylation; ethanolamine (DE)	P04080	1867.78	17
1918	M(+42.01)(+15.99)M(+15.99)C(+57.02)GAPSATQPATAE(+43.04)TQHIAD(+43.04)QV	-	-	MMCGAPSATQPATAETQHIADQV	R	Acetylation (Protein N-term); Oxidation (M); Oxidation (M); Carbamidomethylation; ethanolamine (DE); more	P04080	2574.15	23
1919	M(+42.01)(+15.99)M(+15.99)IHGFQSSH	-	-	MMIHGFQSSH	R	Acetylation (Protein N-term); Oxidation (M); Oxidation (M)	O75663	1247.51	10
1920	M(+42.01)(+15.99)M(+15.99)LGTE(+43.04)GGE(+43.04)GFVVK(+45.03)V	-	-	MMLGTEGGEGFVVKV	R	Acetylation (Protein N-term); Oxidation (M); Oxidation (M); ethanolamine (DE); ethanolamine (DE); more	P31943	1757.88	15
1921	M(+42.01)(+15.99)M(+15.99)LSTEGRE(+43.04)GFVVK(+45.03)V	-	-	MMLSTEGREGFVVKV	R	Acetylation (Protein N-term); Oxidation (M); Oxidation (M); ethanolamine (DE); acetyl-d3 (K)	P55795	1843.93	15
1922	M(+42.01)(+15.99)M(+15.99)PGPRP	-	-	MMPGPRP	R	Acetylation (Protein N-term); Oxidation (M); Oxidation (M)	Q5T0F9	858.373	7
1923	M(+42.01)(+15.99)M(+15.99)PTPVILLK(+45.03)	-	-	MMPTPVILLK	E	Acetylation (Protein N-term); Oxidation (M); Oxidation (M); acetyl-d3 (K)	Q99832	1260.69	10
1924	M(+42.01)(+15.99)M(+15.99)QIC(+57.02)D(+43.04)TYNQK(+45.03)HSLFNAM(+15.99)N	-	-	MMQICDTYNQKHSLFNAMN	R	Acetylation (Protein N-term); Oxidation (M); Oxidation (M); Carbamidomethylation; ethanolamine (DE); more	Q9NPA3	2523.07	19
1925	M(+42.01)(+15.99)MC(+57.02)GAPSATQPATAE(+43.04)TQHIAD(+43.04)QV	-	-	MMCGAPSATQPATAETQHIADQV	R	Acetylation (Protein N-term); Oxidation (M); Carbamidomethylation; ethanolamine (DE); ethanolamine (DE)	P04080	2558.16	23
1926	M(+42.01)(+15.99)MK(+45.03)LK(+45.03)SNQT	-	-	MMKLKSNQT	R	Acetylation (Protein N-term); Oxidation (M); acetyl-d3 (K); acetyl-d3 (K)	O95989	1227.61	9
1927	M(+42.01)(+15.99)MLGTE(+43.04)GGE(+43.04)GFVVK(+45.03)V	-	-	MMLGTEGGEGFVVKV	R	Acetylation (Protein N-term); Oxidation (M); ethanolamine (DE); ethanolamine (DE); acetyl-d3 (K)	P31943	1741.88	15
1928	M(+42.01)(+15.99)MPTPVILLK(+45.03)E(+43.04)GTD(+43.04)	-	-	MMPTPVILLKEGTD	S	Acetylation (Protein N-term); Oxidation (M); acetyl-d3 (K); ethanolamine (DE); ethanolamine (DE)	Q99832	1732.92	14
1929	M(+42.01)(+15.99)NAGSD(+43.04)PVVIVSAA	-	-	MNAGSDPVVIVSAA	R	Acetylation (Protein N-term); Oxidation (M); ethanolamine (DE)	Q9BWD1	1430.71	14
1930	M(+42.01)(+15.99)ND(+43.04)TVTI	-	-	MNDTVTI	R	Acetylation (Protein N-term); Oxidation (M); ethanolamine (DE)	P62847	893.416	7
1931	M(+42.01)(+15.99)ND(+43.04)TVTIRT	-	-	MNDTVTIRT	R	Acetylation (Protein N-term); Oxidation (M); ethanolamine (DE)	P62847	1150.57	9
1932	M(+42.01)(+15.99)NDTVTIRT	-	-	MNDTVTIRT	R	Acetylation (Protein N-term); Oxidation (M)	P62847	1107.52	9
1933	M(+42.01)(+15.99)NHK(+45.03)SK(+45.03)K(+45.03)	-	-	MNHKSKK	R	Acetylation (Protein N-term); Oxidation (M); acetyl-d3 (K); acetyl-d3 (K); acetyl-d3 (K)	Q6NYC1	1064.56	7
1934	M(+42.01)(+15.99)NHTVQTF	-，-	-，-	MNHTVQTF	F，F	Acetylation (Protein N-term); Oxidation (M)	Q01628，C9JQL5	1034.45	8
1935	M(+42.01)(+15.99)NHTVQTFFSPVNSGQPPNY	-，-	-，-	MNHTVQTFFSPVNSGQPPNY	E，E	Acetylation (Protein N-term); Oxidation (M)	Q01628，C9JQL5	2322.04	20
1936	M(+42.01)(+15.99)NIND(+43.04)LK(+45.03)LTLSK(+45.03)AGQE(+43.04)HLL	-	-	MNINDLKLTLSKAGQEHLL	R	Acetylation (Protein N-term); Oxidation (M); ethanolamine (DE); acetyl-d3 (K); acetyl-d3 (K); more	Q16222	2371.31	19
1937	M(+42.01)(+15.99)NK(+45.03)HQK(+45.03)PVLTGQ	-	-	MNKHQKPVLTGQ	R	Acetylation (Protein N-term); Oxidation (M); acetyl-d3 (K); acetyl-d3 (K)	Q9Y6E2	1527.8	12
1938	M(+42.01)(+15.99)NK(+45.03)LK(+45.03)SSQK(+45.03)D(+43.04)K(+45.03)V	-	-	MNKLKSSQKDKV	R	Acetylation (Protein N-term); Oxidation (M); acetyl-d3 (K); acetyl-d3 (K); acetyl-d3 (K); more	Q96GG9	1685.94	12
1939	M(+42.01)(+15.99)NK(+45.03)PITPSTYV	-	-	MNKPITPSTYV	R	Acetylation (Protein N-term); Oxidation (M); acetyl-d3 (K)	Q9NWZ3	1352.67	11
1940	M(+42.01)(+15.99)NLLPNIE(+43.04)SPVT	-	-	MNLLPNIESPVT	R	Acetylation (Protein N-term); Oxidation (M); ethanolamine (DE)	P17980	1427.73	12
1941	M(+42.01)(+15.99)NLQAQPK(+45.03)AQNK(+45.03)	-	-	MNLQAQPKAQNK	R	Acetylation (Protein N-term); Oxidation (M); acetyl-d3 (K); acetyl-d3 (K)	Q6PJG2	1517.78	12
1942	M(+42.01)(+15.99)NNQK(+45.03)QQK(+45.03)PTLSGQ	-	-	MNNQKQQKPTLSGQ	R	Acetylation (Protein N-term); Oxidation (M); acetyl-d3 (K); acetyl-d3 (K)	Q7L1Q6	1748.86	14
1943	M(+42.01)(+15.99)NPIVVVHGGGAGPISK(+45.03)D(+43.04)	-	-	MNPIVVVHGGGAGPISKD	R	Acetylation (Protein N-term); Oxidation (M); acetyl-d3 (K); ethanolamine (DE)	Q7L266	1892.99	18
1944	M(+42.01)(+15.99)NPLTK(+45.03)VK(+45.03)LINELNE(+43.04)(+43.04)	-	-	MNPLTKVKLINELNE	R	Acetylation (Protein N-term); Oxidation (M); acetyl-d3 (K); acetyl-d3 (K); ethanolamine (C-term); more	Q9Y388	1989.11	15
1945	M(+42.01)(+15.99)NPSAPSYPM(+15.99)A	-	-	MNPSAPSYPMA	S	Acetylation (Protein N-term); Oxidation (M); Oxidation (M)	P11940	1238.49	11
1946	M(+42.01)(+15.99)NPSAPSYPM(+15.99)ASL	-	-	MNPSAPSYPMASL	Y	Acetylation (Protein N-term); Oxidation (M); Oxidation (M)	P11940	1438.61	13
1947	M(+42.01)(+15.99)NPSAPSYPMA	-	-	MNPSAPSYPMA	S	Acetylation (Protein N-term); Oxidation (M)	P11940	1222.5	11
1948	M(+42.01)(+15.99)NQE(+43.04)K(+45.03)LAK(+45.03)LQAQV	-，T	-，I	MNQEKLAKLQAQV	R，R	Acetylation (Protein N-term); Oxidation (M); ethanolamine (DE); acetyl-d3 (K); acetyl-d3 (K)	Q96K17，P20290	1690.92	13
1949	M(+42.01)(+15.99)NSVGE(+43.04)AC(+57.02)TD(+43.04)M(+15.99)K(+45.03)	-	-	MNSVGEACTDMK	R	Acetylation (Protein N-term); Oxidation (M); ethanolamine (DE); Carbamidomethylation; ethanolamine (DE); more	O43715	1546.65	12
1950	M(+42.01)(+15.99)NVD(+43.04)HE(+43.04)VNLLVE(+43.04)E(+43.04)IH	-	-	MNVDHEVNLLVEEIH	R	Acetylation (Protein N-term); Oxidation (M); ethanolamine (DE); ethanolamine (DE); ethanolamine (DE); more	Q9P1F3	2020.04	15
1951	M(+42.01)(+15.99)NVGVAHSE(+43.04)VNPNT	-，-	-，-	MNVGVAHSEVNPNT	R，R	Acetylation (Protein N-term); Oxidation (M); ethanolamine (DE)	Q53FV1，Q9P0S3	1568.73	14
1952	M(+42.01)(+15.99)NVTPE(+43.04)VK(+45.03)S	-	-	MNVTPEVKS	R	Acetylation (Protein N-term); Oxidation (M); ethanolamine (DE); acetyl-d3 (K)	Q5T3I0	1149.58	9
1953	M(+42.01)(+15.99)NWNK(+45.03)GGPGTK(+45.03)	-	-	MNWNKGGPGTK	R	Acetylation (Protein N-term); Oxidation (M); acetyl-d3 (K); acetyl-d3 (K)	Q86XP3	1336.64	11
1954	M(+42.01)(+15.99)QAFLK(+45.03)GTSISTK(+45.03)PPLTK(+45.03)D(+43.04)	-	-	MQAFLKGTSISTKPPLTKD	R	Acetylation (Protein N-term); Oxidation (M); acetyl-d3 (K); acetyl-d3 (K); acetyl-d3 (K); more	P35249	2298.25	19
1955	M(+42.01)(+15.99)QAHE(+43.04)LF	-	-	MQAHELF	R	Acetylation (Protein N-term); Oxidation (M); ethanolamine (DE)	P33121	975.448	7
1956	M(+42.01)(+15.99)QAIK(+45.03)C(+57.02)VVVGD(+43.04)	-，-，-	-，-，-	MQAIKCVVVGD	G，G，G	Acetylation (Protein N-term); Oxidation (M); acetyl-d3 (K); Carbamidomethylation; ethanolamine (DE)	P15153，P60763，P63000	1364.69	11
1957	M(+42.01)(+15.99)QD(+43.04)AE(+43.04)NVAVPE(+43.04)AAE(+43.04)	-	-	MQDAENVAVPEAAE	E	Acetylation (Protein N-term); Oxidation (M); ethanolamine (DE); ethanolamine (DE); ethanolamine (DE); more	P55884	1702.82	14
1958	M(+42.01)(+15.99)QD(+43.04)AE(+43.04)NVAVPE(+43.04)AAE(+43.04)E(+43.04)	-	-	MQDAENVAVPEAAEE	R	Acetylation (Protein N-term); Oxidation (M); ethanolamine (DE); ethanolamine (DE); ethanolamine (DE); more	P55884	1874.9	15
1959	M(+42.01)(+15.99)QD(+43.04)AE(+43.04)NVAVPE(+43.04)AAEE(+43.04)	-	-	MQDAENVAVPEAAEE	R	Acetylation (Protein N-term); Oxidation (M); ethanolamine (DE); ethanolamine (DE); ethanolamine (DE); more	P55884	1831.86	15
1960	M(+42.01)(+15.99)QD(+43.04)AE(+43.04)NVAVPE(+43.04)AAEE(+43.04)(+43.04)	-	-	MQDAENVAVPEAAEE	R	Acetylation (Protein N-term); Oxidation (M); ethanolamine (DE); ethanolamine (DE); ethanolamine (DE); more	P55884	1874.9	15
1961	M(+42.01)(+15.99)QDAE(+43.04)NVAVPE(+43.04)AAE(+43.04)E(+43.04)	-	-	MQDAENVAVPEAAEE	R	Acetylation (Protein N-term); Oxidation (M); ethanolamine (DE); ethanolamine (DE); ethanolamine (DE); more	P55884	1831.86	15
1962	M(+42.01)(+15.99)QDAE(+43.04)NVAVPE(+43.04)AAEE(+43.04)(+43.04)	-	-	MQDAENVAVPEAAEE	R	Acetylation (Protein N-term); Oxidation (M); ethanolamine (DE); ethanolamine (DE); ethanolamine (C-term); more	P55884	1831.86	15
1963	M(+42.01)(+15.99)QGE(+43.04)AHPSASLID(+43.04)	-	M	MQGEAHPSASLID	R	Acetylation (Protein N-term); Oxidation (M); ethanolamine (DE); ethanolamine (DE)	Q96SK2	1498.71	13
1964	M(+42.01)(+15.99)QK(+45.03)IK(+45.03)SLM(+15.99)T	-	-	MQKIKSLMT	R	Acetylation (Protein N-term); Oxidation (M); acetyl-d3 (K); acetyl-d3 (K); Oxidation (M)	Q96JG6	1242.65	9
1965	M(+42.01)(+15.99)QND(+43.04)AGE(+43.04)FVD(+43.04)	-	-	MQNDAGEFVD	L	Acetylation (Protein N-term); Oxidation (M); ethanolamine (DE); ethanolamine (DE); ethanolamine (DE)	P63220	1311.58	10
1966	M(+42.01)(+15.99)QND(+43.04)AGE(+43.04)FVD(+43.04)LYVP	-	-	MQNDAGEFVDLYVP	R	Acetylation (Protein N-term); Oxidation (M); ethanolamine (DE); ethanolamine (DE); ethanolamine (DE)	P63220	1783.85	14
1967	M(+42.01)(+15.99)QNDAGE(+43.04)FVD(+43.04)LYVP	-	-	MQNDAGEFVDLYVP	R	Acetylation (Protein N-term); Oxidation (M); ethanolamine (DE); ethanolamine (DE)	P63220	1740.8	14
1968	M(+42.01)(+15.99)QNVINTVK(+45.03)GK(+45.03)	-	-	MQNVINTVKGK	A	Acetylation (Protein N-term); Oxidation (M); acetyl-d3 (K); acetyl-d3 (K)	Q9NT62	1378.74	11
1969	M(+42.01)(+15.99)QPASAK(+45.03)WYD(+43.04)	-	-	MQPASAKWYD	R	Acetylation (Protein N-term); Oxidation (M); acetyl-d3 (K); ethanolamine (DE)	Q15185	1341.61	10
1970	M(+42.01)(+15.99)QPASAK(+45.03)WYD(+43.04)R	-	-	MQPASAKWYDR	R	Acetylation (Protein N-term); Oxidation (M); acetyl-d3 (K); ethanolamine (DE)	Q15185	1497.71	11
1971	M(+42.01)(+15.99)QPASAK(+45.03)WYDR	-	-	MQPASAKWYDR	R	Acetylation (Protein N-term); Oxidation (M); acetyl-d3 (K)	Q15185	1454.67	11
1972	M(+42.01)(+15.99)QPASAK(+45.03)WYDR(+43.04)	-	-	MQPASAKWYDR	R	Acetylation (Protein N-term); Oxidation (M); acetyl-d3 (K); ethanolamine (C-term)	Q15185	1497.71	11
1973	M(+42.01)(+15.99)QPPPQTVPSGM(+15.99)AGPPPAGNP	-	-	MQPPPQTVPSGMAGPPPAGNP	R	Acetylation (Protein N-term); Oxidation (M); Oxidation (M)	O15027	2100.96	21
1974	M(+42.01)(+15.99)QPWHGK(+45.03)AM(+15.99)Q	-	-	MQPWHGKAMQ	R	Acetylation (Protein N-term); Oxidation (M); acetyl-d3 (K); Oxidation (M)	Q8N884	1331.58	10
1975	M(+42.01)(+15.99)QQPQPQGQQQPGPGQQLGGQGAAPGAGGGPGGGPGPGPC(+57.02)L	-	-	MQQPQPQGQQQPGPGQQLGGQGAAPGAGGGPGGGPGPGPCL	R	Acetylation (Protein N-term); Oxidation (M); Carbamidomethylation	Q7Z7E8	3815.75	41
1976	M(+42.01)(+15.99)QSNK(+45.03)TF	-	-	MQSNKTF	N	Acetylation (Protein N-term); Oxidation (M); acetyl-d3 (K)	Q15233	957.431	7
1977	M(+42.01)(+15.99)QSNK(+45.03)TFNL	-	-	MQSNKTFNL	E	Acetylation (Protein N-term); Oxidation (M); acetyl-d3 (K)	Q15233	1184.56	9
1978	M(+42.01)(+15.99)QSNK(+45.03)TFNLE(+43.04)	-	-	MQSNKTFNLE	K	Acetylation (Protein N-term); Oxidation (M); acetyl-d3 (K); ethanolamine (DE)	Q15233	1356.64	10
1979	M(+42.01)(+15.99)QSNK(+45.03)TFNLE(+43.04)K(+45.03)QNH	-	-	MQSNKTFNLEKQNH	T	Acetylation (Protein N-term); Oxidation (M); acetyl-d3 (K); ethanolamine (DE); acetyl-d3 (K)	Q15233	1908.93	14
1980	M(+42.01)(+15.99)QSNK(+45.03)TFNLE(+43.04)K(+45.03)QNHTP	-	-	MQSNKTFNLEKQNHTP	R	Acetylation (Protein N-term); Oxidation (M); acetyl-d3 (K); ethanolamine (DE); acetyl-d3 (K)	Q15233	2107.03	16
1981	M(+42.01)(+15.99)QSNK(+45.03)TFNLEK(+45.03)QNHTP	-	-	MQSNKTFNLEKQNHTP	R	Acetylation (Protein N-term); Oxidation (M); acetyl-d3 (K); acetyl-d3 (K)	Q15233	2063.99	16
1982	M(+42.01)(+15.99)QSNK(+45.03)TFNLEK(+45.03)QNHTP(+43.04)	-	-	MQSNKTFNLEKQNHTP	R	Acetylation (Protein N-term); Oxidation (M); acetyl-d3 (K); acetyl-d3 (K); ethanolamine (C-term)	Q15233	2107.03	16
1983	M(+42.01)(+15.99)QTPVNIPVPVL	-	-	MQTPVNIPVPVL	R	Acetylation (Protein N-term); Oxidation (M)	Q9H840	1364.74	12
1984	M(+42.01)(+15.99)RSAAAAPRSPAVATES	-	-	MRSAAAAPRSPAVATES	R	Acetylation (Protein N-term); Oxidation (M)	Q99700	1729.84	17
1985	M(+42.01)(+15.99)SILK(+45.03)IHA	-	-	MSILKIHA	R	Acetylation (Protein N-term); Oxidation (M); acetyl-d3 (K)	P06733	1014.56	8
1986	M(+42.01)(+15.99)SK(+45.03)SE(+43.04)SPK(+45.03)E(+43.04)PE(+43.04)QL	-	-	MSKSESPKEPEQL	R	Acetylation (Protein N-term); Oxidation (M); acetyl-d3 (K); ethanolamine (DE); acetyl-d3 (K); more	P09651	1765.9	13
1987	M(+42.01)(+15.99)SPAAAAAGAGE(+43.04)	-，-	-，-	MSPAAAAAGAGE	R，R	Acetylation (Protein N-term); Oxidation (M); ethanolamine (DE)	Q96HA1，A8CG34	1103.49	12
1988	M(+42.01)(+15.99)SPTISHK(+45.03)D(+43.04)SS	-	-	MSPTISHKDSS	R	Acetylation (Protein N-term); Oxidation (M); acetyl-d3 (K); ethanolamine (DE)	O00400	1334.62	11
1989	M(+42.01)(+15.99)SVDPAC(+57.02)PQSLPC(+57.02)FEASDC(+57.02)K(+45.03)ESSPM(+15.99)PVIC(+57.02)GPEENYPSLQM(+15.99)SSAEM(+15.99)	-	-	MSVDPACPQSLPCFEASDCKESSPMPVICGPEENYPSLQMSSAEM	P	Acetylation (Protein N-term); Oxidation (M); Carbamidomethylation; Carbamidomethylation; Carbamidomethylation; more	Q9H9S0	5200.12	45
1990	M(+42.01)(+15.99)TE(+43.04)AD(+43.04)VNPK(+45.03)AYPLADA(+43.04)	-	-	MTEADVNPKAYPLADA	H	Acetylation (Protein N-term); Oxidation (M); ethanolamine (DE); ethanolamine (DE); acetyl-d3 (K); more	P55769	1936.96	16
1991	M(+42.01)(+15.99)TE(+43.04)NSTSAPAAK(+45.03)PK(+45.03)	-	-	MTENSTSAPAAKPK	R	Acetylation (Protein N-term); Oxidation (M); ethanolamine (DE); acetyl-d3 (K); acetyl-d3 (K)	P07305	1622.81	14
1992	M(+42.01)(+15.99)TE(+43.04)WE(+43.04)TAAPAVA	-	-	MTEWETAAPAVA	E	Acetylation (Protein N-term); Oxidation (M); ethanolamine (DE); ethanolamine (DE)	P46782	1419.67	12
1993	M(+42.01)(+15.99)TK(+45.03)AGSK(+45.03)GGNL	-	-	MTKAGSKGGNL	R	Acetylation (Protein N-term); Oxidation (M); acetyl-d3 (K); acetyl-d3 (K)	Q96AG4	1210.61	11
1994	M(+42.01)(+15.99)TM(+15.99)D(+43.04)K(+45.03)SE(+43.04)LVQK(+45.03)AK(+45.03)L	-	-	MTMDKSELVQKAKL	A	Acetylation (Protein N-term); Oxidation (M); Oxidation (M); ethanolamine (DE); acetyl-d3 (K); more	P31946	1916.03	14
1995	M(+42.01)(+15.99)TM(+15.99)D(+43.04)K(+45.03)SE(+43.04)LVQK(+45.03)AK(+45.03)LAE(+43.04)QA	-	-	MTMDKSELVQKAKLAEQA	E	Acetylation (Protein N-term); Oxidation (M); Oxidation (M); ethanolamine (DE); acetyl-d3 (K); more	P31946	2358.25	18
1996	M(+42.01)(+15.99)TM(+15.99)D(+43.04)K(+45.03)SE(+43.04)LVQK(+45.03)AK(+45.03)LAE(+43.04)QAE(+43.04)	-	-	MTMDKSELVQKAKLAEQAE	R	Acetylation (Protein N-term); Oxidation (M); Oxidation (M); ethanolamine (DE); acetyl-d3 (K); more	P31946	2530.33	19
1997	M(+42.01)(+15.99)TMD(+43.04)K(+45.03)SE(+43.04)LVQK(+45.03)AK(+45.03)L	-	-	MTMDKSELVQKAKL	A	Acetylation (Protein N-term); Oxidation (M); ethanolamine (DE); acetyl-d3 (K); ethanolamine (DE); more	P31946	1900.04	14
[truncated: 1,663 more rows]

## Sheet: Table S3b
Table S3. List of identified terminal peptides from Hela cell using LysargiNase as protease after protein d3-acetylation.
Table S3b. List of identified C-terminal peptides.
Number	Peptide	secaaBefore	aaBefore	pepSeq	aaAfter	PTM	Accession	Mass	Length
1	AAAAAAAAAPAAAATAPTTAATTAATAAQ(+43.04)	T	K	AAAAAAAAAPAAAATAPTTAATTAATAAQ	-	ethanolamine (C-term)	P37108	2410.25	29
2	AAAAAAAPAAAATAPTTAATTAATAAQ(+43.04)	A	A	AAAAAAAPAAAATAPTTAATTAATAAQ	-	ethanolamine (C-term)	P37108	2268.17	27
3	AAAAAAPAAAATAPTTAATTAATAAQ(+43.04)	A	A	AAAAAAPAAAATAPTTAATTAATAAQ	-	ethanolamine (C-term)	P37108	2197.13	26
4	AAAAAPAAAATAPTTAATTAATAAQ	A	A	AAAAAPAAAATAPTTAATTAATAAQ	-		P37108	2083.05	25
5	AAAAAPAAAATAPTTAATTAATAAQ(+43.04)	A	A	AAAAAPAAAATAPTTAATTAATAAQ	-	ethanolamine (C-term)	P37108	2126.1	25
6	AAAAK(+45.03)K(+45.03)TLE(+43.04)GGC(+57.02)(+43.04)	C	F	AAAAKKTLEGGC	-	acetyl-d3 (K); acetyl-d3 (K); ethanolamine (DE); Carbamidomethylation; ethanolamine (C-term)	A1L188	1351.74	12
7	AAAAPAAAATAPTTAATTAATAAQ	A	A	AAAAPAAAATAPTTAATTAATAAQ	-		P37108	2012.02	24
8	AAAAPAAAATAPTTAATTAATAAQ(+43.04)	A	A	AAAAPAAAATAPTTAATTAATAAQ	-	ethanolamine (C-term)	P37108	2055.06	24
9	AAAGPQGPGTGE(+43.04)(+43.04)	V	I	AAAGPQGPGTGE	-	ethanolamine (C-term); ethanolamine (DE)	P85037	1097.55	12
10	AAAIHAQVPE(+43.04)D(+43.04)	S	L	AAAIHAQVPED	-	ethanolamine (DE); ethanolamine (DE)	Q8TDP1	1206.64	11
11	AAAIHAQVPE(+43.04)D(+43.04)(+43.04)	S	L	AAAIHAQVPED	-	ethanolamine (DE); ethanolamine (C-term); ethanolamine (DE)	Q8TDP1	1249.68	11
12	AAAM(+15.99)K(+45.03)K(+45.03)QSHTE(+43.04)K(+45.03)S(+43.04)	T	E	AAAMKKQSHTEKS	-	Oxidation (M); acetyl-d3 (K); acetyl-d3 (K); ethanolamine (DE); acetyl-d3 (K); more	Q86UT8	1652.89	13
13	AAANPLGM(+15.99)PVPAAAGAQQ(+43.04)	V	I	AAANPLGMPVPAAAGAQQ	-	Oxidation (M); ethanolamine (C-term)	P68400	1692.86	18
14	AAANPLGMPVPAAAGAQQ(+43.04)	V	I	AAANPLGMPVPAAAGAQQ	-	ethanolamine (C-term)	P68400	1676.87	18
15	AAAPAAAATAPTTAATTAATAAQ	A	A	AAAPAAAATAPTTAATTAATAAQ	-		P37108	1940.98	23
16	AAAPAAAATAPTTAATTAATAAQ(+43.04)	A	A	AAAPAAAATAPTTAATTAATAAQ	-	ethanolamine (C-term)	P37108	1984.02	23
17	AAASSAC(+57.02)AAPSQE(+43.04)AQPE(+43.04)C(+57.02)SPE(+43.04)APPAE(+43.04)AAE(+43.04)(+43.04)	A	A	AAASSACAAPSQEAQPECSPEAPPAEAAE	-	Carbamidomethylation; ethanolamine (DE); ethanolamine (DE); Carbamidomethylation; ethanolamine (DE); more	P29966	3112.46	29
18	AAATAPTTAATTAATAAQ(+43.04)	P	A	AAATAPTTAATTAATAAQ	-	ethanolamine (C-term)	P37108	1602.82	18
19	AAATK(+45.03)K(+45.03)PAPE(+43.04)K(+45.03)K(+45.03)PAE(+43.04)K(+45.03)K(+45.03)PTTE(+43.04)E(+43.04)K(+45.03)K(+45.03)PAA(+43.04)	K	K	AAATKKPAPEKKPAEKKPTTEEKKPAA	-	acetyl-d3 (K); acetyl-d3 (K); ethanolamine (DE); acetyl-d3 (K); acetyl-d3 (K); more	P36578	3420.05	27
20	AAATK(+45.03)K(+45.03)PAPE(+43.04)K(+45.03)K(+45.03)PAE(+43.04)K(+45.03)K(+45.03)PTTEE(+43.04)K(+45.03)K(+45.03)PAA(+43.04)	K	K	AAATKKPAPEKKPAEKKPTTEEKKPAA	-	acetyl-d3 (K); acetyl-d3 (K); ethanolamine (DE); acetyl-d3 (K); acetyl-d3 (K); more	P36578	3377.01	27
21	AAAVAQD(+43.04)PAASGAPSS(+43.04)	A	L	AAAVAQDPAASGAPSS	-	ethanolamine (DE); ethanolamine (C-term)	Q8TAE8	1455.73	16
22	AAD(+43.04)GD(+43.04)FK(+45.03)IK(+45.03)C(+57.02)VAFD(+43.04)	Y	M	AADGDFKIKCVAFD	-	ethanolamine (DE); ethanolamine (DE); acetyl-d3 (K); acetyl-d3 (K); Carbamidomethylation; more	P09382	1774.92	14
23	AAD(+43.04)GD(+43.04)FK(+45.03)IK(+45.03)C(+57.02)VAFD(+43.04)(+43.04)	Y	M	AADGDFKIKCVAFD	-	ethanolamine (DE); ethanolamine (DE); acetyl-d3 (K); acetyl-d3 (K); Carbamidomethylation; more	P09382	1817.96	14
24	AAD(+43.04)PPAE(+43.04)NSSAPE(+43.04)AE(+43.04)QGGAE(+43.04)	T	K	AADPPAENSSAPEAEQGGAE	-	ethanolamine (DE); ethanolamine (DE); ethanolamine (DE); ethanolamine (DE); ethanolamine (DE)	P67809	2112.01	20
25	AAD(+43.04)PPAE(+43.04)NSSAPE(+43.04)AE(+43.04)QGGAE(+43.04)(+43.04)	T	K	AADPPAENSSAPEAEQGGAE	-	ethanolamine (DE); ethanolamine (DE); ethanolamine (DE); ethanolamine (DE); ethanolamine (C-term); more	P67809	2155.05	20
26	AADGD(+43.04)FK(+45.03)IK(+45.03)C(+57.02)VAFD(+43.04)(+43.04)	Y	M	AADGDFKIKCVAFD	-	ethanolamine (DE); acetyl-d3 (K); acetyl-d3 (K); Carbamidomethylation; ethanolamine (C-term); more	P09382	1774.92	14
27	AAE(+43.04)GPSD(+43.04)IPD(+43.04)(+43.04)	I	D	AAEGPSDIPD	-	ethanolamine (DE); ethanolamine (DE); ethanolamine (C-term); ethanolamine (DE)	P42771	1142.59	10
28	AAE(+43.04)QD(+43.04)VE(+43.04)K(+45.03)K(+45.03)K(+45.03)	K	E	AAEQDVEKKK	-	ethanolamine (DE); ethanolamine (DE); ethanolamine (DE); acetyl-d3 (K); acetyl-d3 (K); more	P26373	1408.82	10
29	AAE(+43.04)QD(+43.04)VE(+43.04)K(+45.03)K(+45.03)K(+45.03)(+43.04)	K	E	AAEQDVEKKK	-	ethanolamine (DE); ethanolamine (DE); ethanolamine (DE); acetyl-d3 (K); acetyl-d3 (K); more	P26373	1451.87	10
30	AAEQD(+43.04)VE(+43.04)K(+45.03)K(+45.03)K(+45.03)(+43.04)	K	E	AAEQDVEKKK	-	ethanolamine (DE); ethanolamine (DE); acetyl-d3 (K); acetyl-d3 (K); acetyl-d3 (K); more	P26373	1408.82	10
31	AAFMK(+45.03)K(+45.03)FLE(+43.04)M(+15.99)HQL(+43.04)	K	L	AAFMKKFLEMHQL	-	acetyl-d3 (K); acetyl-d3 (K); ethanolamine (DE); Oxidation (M); ethanolamine (C-term)	Q9Y617	1784.96	13
32	AAGAGK(+45.03)VTK(+45.03)SAQK(+45.03)AQK(+45.03)AK(+45.03)	K，K	K，K	AAGAGKVTKSAQKAQKAK	-，-	acetyl-d3 (K); acetyl-d3 (K); acetyl-d3 (K); acetyl-d3 (K); acetyl-d3 (K)	Q5VTE0，P68104	1967.16	18
33	AAGAGK(+45.03)VTK(+45.03)SAQK(+45.03)AQK(+45.03)AK(+45.03)(+43.04)	K，K	K，K	AAGAGKVTKSAQKAQKAK	-，-	acetyl-d3 (K); acetyl-d3 (K); acetyl-d3 (K); acetyl-d3 (K); acetyl-d3 (K); more	Q5VTE0，P68104	2010.21	18
34	AAGK(+45.03)GPLATGGIK(+45.03)K(+45.03)SGK(+45.03)K(+45.03)(+43.04)	A	K	AAGKGPLATGGIKKSGKK	-	acetyl-d3 (K); acetyl-d3 (K); acetyl-d3 (K); acetyl-d3 (K); acetyl-d3 (K); more	Q9Y2S6	1936.19	18
35	AAGPPE(+43.04)AAGE(+43.04)NFAPC(+57.02)SVAPGK(+45.03)SL(+43.04)	G	L	AAGPPEAAGENFAPCSVAPGKSL	-	ethanolamine (DE); ethanolamine (DE); Carbamidomethylation; acetyl-d3 (K); ethanolamine (C-term)	Q96CP2	2371.2	23
36	AAGTK(+45.03)K(+45.03)QFQK(+45.03)F(+43.04)	T	K	AAGTKKQFQKF	-	acetyl-d3 (K); acetyl-d3 (K); acetyl-d3 (K); ethanolamine (C-term)	P62280	1430.82	11
37	AAIHAQVPE(+43.04)D(+43.04)	L	A	AAIHAQVPED	-	ethanolamine (DE); ethanolamine (DE)	Q8TDP1	1135.6	10
38	AAIQE(+43.04)LLNSA(+43.04)	Q	Q	AAIQELLNSA	-	ethanolamine (DE); ethanolamine (C-term)	O00410	1114.63	10
39	AAK(+45.03)AGAPGK(+45.03)A(+43.04)	A	Q	AAKAGAPGKA	-	acetyl-d3 (K); acetyl-d3 (K); ethanolamine (C-term)	O15212	973.583	10
40	AAK(+45.03)AGLLGQPR(+43.04)	A	L	AAKAGLLGQPR	-	acetyl-d3 (K); ethanolamine (C-term)	Q9Y5J7	1168.71	11
41	AAK(+45.03)AK(+45.03)K(+45.03)AAAK(+45.03)K(+45.03)K(+45.03)(+43.04)	P	K	AAKAKKAAAKKK	-	acetyl-d3 (K); acetyl-d3 (K); acetyl-d3 (K); acetyl-d3 (K); acetyl-d3 (K); more	P16401	1526.02	12
42	AAK(+45.03)AVK(+45.03)PK(+45.03)AAK(+45.03)PK(+45.03)VVK(+45.03)PK(+45.03)K(+45.03)AAPK(+45.03)K(+45.03)K(+45.03)	K	S	AAKAVKPKAAKPKVVKPKKAAPKKK	-	acetyl-d3 (K); acetyl-d3 (K); acetyl-d3 (K); acetyl-d3 (K); acetyl-d3 (K); more	P16403	3105.05	25
43	AAK(+45.03)AVK(+45.03)PK(+45.03)AAK(+45.03)PK(+45.03)VVK(+45.03)PK(+45.03)K(+45.03)AAPK(+45.03)K(+45.03)K(+45.03)(+43.04)	K	S	AAKAVKPKAAKPKVVKPKKAAPKKK	-	acetyl-d3 (K); acetyl-d3 (K); acetyl-d3 (K); acetyl-d3 (K); acetyl-d3 (K); more	P16403	3148.1	25
44	AAK(+45.03)E(+43.04)AM(+15.99)K(+45.03)SNR(+43.04)	I	M	AAKEAMKSNR	-	acetyl-d3 (K); ethanolamine (DE); Oxidation (M); acetyl-d3 (K); ethanolamine (C-term)	Q13177	1296.71	10
45	AAK(+45.03)PK(+45.03)AAK(+45.03)AK(+45.03)K(+45.03)AAAK(+45.03)K(+45.03)K(+45.03)	P	K	AAKPKAAKAKKAAAKKK	-	acetyl-d3 (K); acetyl-d3 (K); acetyl-d3 (K); acetyl-d3 (K); acetyl-d3 (K); more	P16401	2068.36	17
46	AAK(+45.03)PK(+45.03)AAK(+45.03)AK(+45.03)K(+45.03)AAAK(+45.03)K(+45.03)K(+45.03)(+43.04)	P	K	AAKPKAAKAKKAAAKKK	-	acetyl-d3 (K); acetyl-d3 (K); acetyl-d3 (K); acetyl-d3 (K); acetyl-d3 (K); more	P16401	2111.4	17
47	AAK(+45.03)PK(+45.03)AAK(+45.03)PK(+45.03)AAK(+45.03)AK(+45.03)K(+45.03)AAAK(+45.03)K(+45.03)K(+45.03)	P	K	AAKPKAAKPKAAKAKKAAAKKK	-	acetyl-d3 (K); acetyl-d3 (K); acetyl-d3 (K); acetyl-d3 (K); acetyl-d3 (K); more	P16401	2653.73	22
48	AAK(+45.03)PK(+45.03)AAK(+45.03)PK(+45.03)AAK(+45.03)AK(+45.03)K(+45.03)AAAK(+45.03)K(+45.03)K(+45.03)(+43.04)	P	K	AAKPKAAKPKAAKAKKAAAKKK	-	acetyl-d3 (K); acetyl-d3 (K); acetyl-d3 (K); acetyl-d3 (K); acetyl-d3 (K); more	P16401	2696.77	22
49	AAK(+45.03)PK(+45.03)AAK(+45.03)PK(+45.03)AAK(+45.03)PK(+45.03)AAK(+45.03)AK(+45.03)K(+45.03)AAAK(+45.03)K(+45.03)K(+45.03)(+43.04)	P	K	AAKPKAAKPKAAKPKAAKAKKAAAKKK	-	acetyl-d3 (K); acetyl-d3 (K); acetyl-d3 (K); acetyl-d3 (K); acetyl-d3 (K); more	P16401	3282.15	27
50	AAK(+45.03)PK(+45.03)K(+45.03)AAAK(+45.03)K(+45.03)K(+45.03)	P	K	AAKPKKAAAKKK	-	acetyl-d3 (K); acetyl-d3 (K); acetyl-d3 (K); acetyl-d3 (K); acetyl-d3 (K); more	P10412	1508.99	12
51	AAK(+45.03)PK(+45.03)K(+45.03)AAAK(+45.03)K(+45.03)K(+45.03)(+43.04)	P	K	AAKPKKAAAKKK	-	acetyl-d3 (K); acetyl-d3 (K); acetyl-d3 (K); acetyl-d3 (K); acetyl-d3 (K); more	P10412	1552.04	12
52	AAK(+45.03)PK(+45.03)K(+45.03)APK(+45.03)SPAK(+45.03)AK(+45.03)AVK(+45.03)PK(+45.03)AAK(+45.03)PK(+45.03)TAK(+45.03)PK(+45.03)AAK(+45.03)PK(+45.03)K(+45.03)AAAK(+45.03)K(+45.03)K(+45.03)	A	K	AAKPKKAPKSPAKAKAVKPKAAKPKTAKPKAAKPKKAAAKKK	-	acetyl-d3 (K); acetyl-d3 (K); acetyl-d3 (K); acetyl-d3 (K); acetyl-d3 (K); more	P10412	5095.29	42
53	AAK(+45.03)PK(+45.03)K(+45.03)APK(+45.03)SPAK(+45.03)AK(+45.03)AVK(+45.03)PK(+45.03)AAK(+45.03)PK(+45.03)TAK(+45.03)PK(+45.03)AAK(+45.03)PK(+45.03)K(+45.03)AAAK(+45.03)K(+45.03)K(+45.03)(+43.04)	A	K	AAKPKKAPKSPAKAKAVKPKAAKPKTAKPKAAKPKKAAAKKK	-	acetyl-d3 (K); acetyl-d3 (K); acetyl-d3 (K); acetyl-d3 (K); acetyl-d3 (K); more	P10412	5138.33	42
54	AAK(+45.03)PK(+45.03)SGK(+45.03)PK(+45.03)VTK(+45.03)AK(+45.03)K(+45.03)AAPK(+45.03)K(+45.03)K(+45.03)	P	K	AAKPKSGKPKVTKAKKAAPKKK	-	acetyl-d3 (K); acetyl-d3 (K); acetyl-d3 (K); acetyl-d3 (K); acetyl-d3 (K); more	P16402	2739.77	22
55	AAK(+45.03)PK(+45.03)SGK(+45.03)PK(+45.03)VTK(+45.03)AK(+45.03)K(+45.03)AAPK(+45.03)K(+45.03)K(+45.03)(+43.04)	P	K	AAKPKSGKPKVTKAKKAAPKKK	-	acetyl-d3 (K); acetyl-d3 (K); acetyl-d3 (K); acetyl-d3 (K); acetyl-d3 (K); more	P16402	2782.81	22
56	AAK(+45.03)PK(+45.03)TAK(+45.03)PK(+45.03)AAK(+45.03)PK(+45.03)K(+45.03)AAAK(+45.03)K(+45.03)K(+45.03)	P	K	AAKPKTAKPKAAKPKKAAAKKK	-	acetyl-d3 (K); acetyl-d3 (K); acetyl-d3 (K); acetyl-d3 (K); acetyl-d3 (K); more	P10412	2709.76	22
57	AAK(+45.03)PK(+45.03)TAK(+45.03)PK(+45.03)AAK(+45.03)PK(+45.03)K(+45.03)AAAK(+45.03)K(+45.03)K(+45.03)(+43.04)	P	K	AAKPKTAKPKAAKPKKAAAKKK	-	acetyl-d3 (K); acetyl-d3 (K); acetyl-d3 (K); acetyl-d3 (K); acetyl-d3 (K); more	P10412	2752.8	22
58	AAK(+45.03)PK(+45.03)VVK(+45.03)PK(+45.03)K(+45.03)AAPK(+45.03)K(+45.03)K(+45.03)	P	K	AAKPKVVKPKKAAPKKK	-	acetyl-d3 (K); acetyl-d3 (K); acetyl-d3 (K); acetyl-d3 (K); acetyl-d3 (K); more	P16403	2176.45	17
59	AAK(+45.03)PK(+45.03)VVK(+45.03)PK(+45.03)K(+45.03)AAPK(+45.03)K(+45.03)K(+45.03)(+43.04)	P	K	AAKPKVVKPKKAAPKKK	-	acetyl-d3 (K); acetyl-d3 (K); acetyl-d3 (K); acetyl-d3 (K); acetyl-d3 (K); more	P16403	2219.49	17
60	AAK(+45.03)SAAK(+45.03)AVK(+45.03)PK(+45.03)AAK(+45.03)PK(+45.03)VVK(+45.03)PK(+45.03)K(+45.03)AAPK(+45.03)K(+45.03)K(+45.03)(+43.04)	K	K	AAKSAAKAVKPKAAKPKVVKPKKAAPKKK	-	acetyl-d3 (K); acetyl-d3 (K); acetyl-d3 (K); acetyl-d3 (K); acetyl-d3 (K); more	P16403	3550.33	29
61	AAK(+45.03)SD(+43.04)E(+43.04)TAAK(+45.03)(+43.04)	P	E	AAKSDETAAK	-	acetyl-d3 (K); ethanolamine (DE); ethanolamine (DE); acetyl-d3 (K); ethanolamine (C-term)	P04792	1209.68	10
62	AAK(+45.03)SPAK(+45.03)AK(+45.03)APK(+45.03)PK(+45.03)AAK(+45.03)PK(+45.03)SGK(+45.03)PK(+45.03)VTK(+45.03)AK(+45.03)K(+45.03)AAPK(+45.03)K(+45.03)K(+45.03)(+43.04)	K	K	AAKSPAKAKAPKPKAAKPKSGKPKVTKAKKAAPKKK	-	acetyl-d3 (K); acetyl-d3 (K); acetyl-d3 (K); acetyl-d3 (K); acetyl-d3 (K); more	P16402	4381.81	36
63	AAK(+45.03)SSLIHQGIR(+43.04)	A	S	AAKSSLIHQGIR	-	acetyl-d3 (K); ethanolamine (C-term)	Q12834	1367.81	12
64	AALAAQAK(+45.03)AK(+45.03)	E	E	AALAAQAKAK	-	acetyl-d3 (K); acetyl-d3 (K)	Q5T6X4	1031.62	10
65	AALE(+43.04)AVGGTVVLE(+43.04)(+43.04)	I	K	AALEAVGGTVVLE	-	ethanolamine (DE); ethanolamine (C-term); ethanolamine (DE)	P52815	1356.8	13
66	AALE(+43.04)LIFAGGAP(+43.04)	I	Q	AALELIFAGGAP	-	ethanolamine (DE); ethanolamine (C-term)	Q96S82	1214.7	12
67	AALK(+45.03)AD(+43.04)AQD(+43.04)	Y	K	AALKADAQD	-	acetyl-d3 (K); ethanolamine (DE); ethanolamine (DE)	P82663	1032.56	9
68	AALK(+45.03)AD(+43.04)AQD(+43.04)(+43.04)	Y	K	AALKADAQD	-	acetyl-d3 (K); ethanolamine (DE); ethanolamine (C-term); ethanolamine (DE)	P82663	1075.61	9
69	AALPAAE(+43.04)AASSG(+43.04)	K	Q	AALPAAEAASSG	-	ethanolamine (DE); ethanolamine (C-term)	Q9UFG5	1100.58	12
70	AALTSIAQK(+45.03)ILD(+43.04)ATPAC(+57.02)LP(+43.04)	A	F	AALTSIAQKILDATPACLP	-	acetyl-d3 (K); ethanolamine (DE); Carbamidomethylation; ethanolamine (C-term)	Q9Y5Y2	2084.17	19
71	AAM(+15.99)LD(+43.04)TVVFK(+45.03)(+43.04)	C	L	AAMLDTVVFK	-	Oxidation (M); ethanolamine (DE); acetyl-d3 (K); ethanolamine (C-term)	O00487	1240.69	10
72	AAMK(+45.03)AK(+45.03)TE(+43.04)(+43.04)	E	E	AAMKAKTE	-	acetyl-d3 (K); acetyl-d3 (K); ethanolamine (C-term); ethanolamine (DE)	Q96A26	1024.59	8
73	AAMLD(+43.04)TVVFK(+45.03)(+43.04)	C	L	AAMLDTVVFK	-	ethanolamine (DE); acetyl-d3 (K); ethanolamine (C-term)	O00487	1224.7	10
74	AANFLLQQNFD(+43.04)E(+43.04)D(+43.04)	N	L	AANFLLQQNFDED	-	ethanolamine (DE); ethanolamine (DE); ethanolamine (DE)	P54727	1652.82	13
75	AANFLLQQNFD(+43.04)E(+43.04)D(+43.04)(+43.04)	N	L	AANFLLQQNFDED	-	ethanolamine (DE); ethanolamine (DE); ethanolamine (C-term); ethanolamine (DE)	P54727	1695.86	13
76	AANFLLQQNFD(+43.04)ED(+43.04)(+43.04)	N	L	AANFLLQQNFDED	-	ethanolamine (DE); ethanolamine (C-term); ethanolamine (DE)	P54727	1652.82	13
77	AANFLLQQNFDE(+43.04)D(+43.04)(+43.04)	N	L	AANFLLQQNFDED	-	ethanolamine (DE); ethanolamine (C-term); ethanolamine (DE)	P54727	1652.82	13
78	AANFLLSQNFD(+43.04)D(+43.04)E(+43.04)(+43.04)	N	L	AANFLLSQNFDDE	-	ethanolamine (DE); ethanolamine (DE); ethanolamine (C-term); ethanolamine (DE)	P54725	1654.83	13
79	AANPLGMPVPAAAGAQQ(+43.04)	I	A	AANPLGMPVPAAAGAQQ	-	ethanolamine (C-term)	P68400	1605.83	17
80	AANVGWNNSTFA	M	N	AANVGWNNSTFA	-		P14174	1250.57	12
81	AANVGWNNSTFA(+43.04)	M	N	AANVGWNNSTFA	-	ethanolamine (C-term)	P14174	1293.61	12
82	AAPAAAATAPTTAATTAATAAQ	A	A	AAPAAAATAPTTAATTAATAAQ	-		P37108	1869.94	22
83	AAPAAAATAPTTAATTAATAAQ(+43.04)	A	A	AAPAAAATAPTTAATTAATAAQ	-	ethanolamine (C-term)	P37108	1912.99	22
84	AAPAPK(+45.03)AQK(+45.03)GQK(+45.03)APAQK(+45.03)APAPK(+45.03)ASGK(+45.03)K(+45.03)A	Q	K	AAPAPKAQKGQKAPAQKAPAPKASGKKA	-	acetyl-d3 (K); acetyl-d3 (K); acetyl-d3 (K); acetyl-d3 (K); acetyl-d3 (K); more	P50914	3010.77	28
85	AAPAPK(+45.03)AQK(+45.03)GQK(+45.03)APAQK(+45.03)APAPK(+45.03)ASGK(+45.03)K(+45.03)A(+43.04)	Q	K	AAPAPKAQKGQKAPAQKAPAPKASGKKA	-	acetyl-d3 (K); acetyl-d3 (K); acetyl-d3 (K); acetyl-d3 (K); acetyl-d3 (K); more	P50914	3053.81	28
86	AAPM(+15.99)IGYPM(+15.99)PTGYSQ(+43.04)	T	A	AAPMIGYPMPTGYSQ	-	Oxidation (M); Oxidation (M); ethanolamine (C-term)	P17844	1657.75	15
87	AAPM(+15.99)IGYPMPTGYSQ(+43.04)	T	A	AAPMIGYPMPTGYSQ	-	Oxidation (M); ethanolamine (C-term)	P17844	1641.75	15
88	AAPMIGYPM(+15.99)PTGYSQ(+43.04)	T	A	AAPMIGYPMPTGYSQ	-	Oxidation (M); ethanolamine (C-term)	P17844	1641.75	15
89	AAPMIGYPMPTGYSQ(+43.04)	T	A	AAPMIGYPMPTGYSQ	-	ethanolamine (C-term)	P17844	1625.76	15
90	AAPRPPPK(+45.03)PM(+15.99)	A，A	G，G	AAPRPPPKPM	-，-	acetyl-d3 (K); Oxidation (M)	P62854，Q5JNZ5	1121.61	10
91	AAPRPPPK(+45.03)PM(+15.99)(+43.04)	A，A	G，G	AAPRPPPKPM	-，-	acetyl-d3 (K); Oxidation (M); ethanolamine (C-term)	P62854，Q5JNZ5	1164.65	10
92	AAPRPPPK(+45.03)PM(+43.04)	A，A	G，G	AAPRPPPKPM	-，-	acetyl-d3 (K); ethanolamine (C-term)	P62854，Q5JNZ5	1148.66	10
93	AAPSQE(+43.04)AQPE(+43.04)C(+57.02)SPE(+43.04)APPAE(+43.04)AAE(+43.04)(+43.04)	A	C	AAPSQEAQPECSPEAPPAEAAE	-	ethanolamine (DE); ethanolamine (DE); Carbamidomethylation; ethanolamine (DE); ethanolamine (DE); more	P29966	2494.21	22
94	AAQE(+43.04)E(+43.04)AAK(+45.03)K(+45.03)(+43.04)	D	L	AAQEEAAKK	-	ethanolamine (DE); ethanolamine (DE); acetyl-d3 (K); acetyl-d3 (K); ethanolamine (C-term)	Q9Y3B7	1163.68	9
95	AAQGK(+45.03)AK(+45.03)K(+45.03)(+43.04)	A，A	V，V	AAQGKAKK	-，-	acetyl-d3 (K); acetyl-d3 (K); acetyl-d3 (K); ethanolamine (C-term)	P18669，Q8N0Y7	978.617	8
96	AAQK(+45.03)AVNSATGVPTV(+43.04)	K	E	AAQKAVNSATGVPTV	-	acetyl-d3 (K); ethanolamine (C-term)	P11940	1500.83	15
97	AAQK(+45.03)E(+43.04)AD(+43.04)LAAQE(+43.04)E(+43.04)AAK(+45.03)K(+45.03)(+43.04)	F	L	AAQKEADLAAQEEAAKK	-	acetyl-d3 (K); ethanolamine (DE); ethanolamine (DE); ethanolamine (DE); ethanolamine (DE); more	Q9Y3B7	2121.21	17
98	AAQK(+45.03)VGAVAAATS(+43.04)	K	E	AAQKVGAVAAATS	-	acetyl-d3 (K); ethanolamine (C-term)	Q13310	1231.7	13
99	AAQVK(+45.03)APLVLK(+45.03)D(+43.04)(+43.04)	E	V	AAQVKAPLVLKD	-	acetyl-d3 (K); acetyl-d3 (K); ethanolamine (C-term); ethanolamine (DE)	Q99497	1427.9	12
100	AASE(+43.04)SLFVSNHAY(+43.04)	G	A	AASESLFVSNHAY	-	ethanolamine (DE); ethanolamine (C-term)	P04075	1480.73	13
101	AASFGK(+45.03)SINF	N	L	AASFGKSINF	-	acetyl-d3 (K)	P09622	1085.56	10
102	AASFGK(+45.03)SINF(+43.04)	N	L	AASFGKSINF	-	acetyl-d3 (K); ethanolamine (C-term)	P09622	1128.6	10
103	AASGNLGHTPFVD(+43.04)E(+43.04)L	S	M	AASGNLGHTPFVDEL	-	ethanolamine (DE); ethanolamine (DE)	P22695	1612.82	15
104	AASGNLGHTPFVD(+43.04)E(+43.04)L(+43.04)	S	M	AASGNLGHTPFVDEL	-	ethanolamine (DE); ethanolamine (DE); ethanolamine (C-term)	P22695	1655.86	15
105	AASGNLGHTPFVD(+43.04)EL(+43.04)	S	M	AASGNLGHTPFVDEL	-	ethanolamine (DE); ethanolamine (C-term)	P22695	1612.82	15
106	AASNFK(+45.03)SPVK(+45.03)TIR(+43.04)	L	Q	AASNFKSPVKTIR	-	acetyl-d3 (K); acetyl-d3 (K); ethanolamine (C-term)	P67870	1550.91	13
107	AASSD(+43.04)SAQGSD(+43.04)VSLTAC(+57.02)K(+45.03)V(+43.04)	T	Q	AASSDSAQGSDVSLTACKV	-	ethanolamine (DE); ethanolamine (DE); Carbamidomethylation; acetyl-d3 (K); ethanolamine (C-term)	P04439	2027	19
108	AATAPTTAATTAATAAQ	A	A	AATAPTTAATTAATAAQ	-		P37108	1488.74	17
109	AATAPTTAATTAATAAQ(+43.04)	A	A	AATAPTTAATTAATAAQ	-	ethanolamine (C-term)	P37108	1531.78	17
110	AATK(+45.03)K(+45.03)PAPE(+43.04)K(+45.03)K(+45.03)PAE(+43.04)K(+45.03)K(+45.03)PTTE(+43.04)E(+43.04)K(+45.03)K(+45.03)PAA(+43.04)	K	A	AATKKPAPEKKPAEKKPTTEEKKPAA	-	acetyl-d3 (K); acetyl-d3 (K); ethanolamine (DE); acetyl-d3 (K); acetyl-d3 (K); more	P36578	3349.02	26
111	AATK(+45.03)K(+45.03)PAPE(+43.04)K(+45.03)K(+45.03)PAE(+43.04)K(+45.03)K(+45.03)PTTE(+43.04)EK(+45.03)K(+45.03)PAA(+43.04)	K	A	AATKKPAPEKKPAEKKPTTEEKKPAA	-	acetyl-d3 (K); acetyl-d3 (K); ethanolamine (DE); acetyl-d3 (K); acetyl-d3 (K); more	P36578	3305.97	26
112	AATK(+45.03)K(+45.03)PAPE(+43.04)K(+45.03)K(+45.03)PAE(+43.04)K(+45.03)K(+45.03)PTTEE(+43.04)K(+45.03)K(+45.03)PAA(+43.04)	K	A	AATKKPAPEKKPAEKKPTTEEKKPAA	-	acetyl-d3 (K); acetyl-d3 (K); ethanolamine (DE); acetyl-d3 (K); acetyl-d3 (K); more	P36578	3305.97	26
113	AATTAATAAQ(+43.04)	T	T	AATTAATAAQ	-	ethanolamine (C-term)	P37108	918.477	10
114	AAVAIK(+45.03)AM(+15.99)AK(+45.03)(+43.04)	E，E	E，E	AAVAIKAMAK	-，-	acetyl-d3 (K); Oxidation (M); acetyl-d3 (K); ethanolamine (C-term)	P63241，Q6IS14	1121.67	10
115	AAVAQD(+43.04)PAASGAPSS(+43.04)	L	A	AAVAQDPAASGAPSS	-	ethanolamine (DE); ethanolamine (C-term)	Q8TAE8	1384.69	15
116	AAVD(+43.04)GPM(+15.99)D(+43.04)K(+45.03)K(+45.03)E(+43.04)E(+43.04)	L	Q	AAVDGPMDKKEE	-	ethanolamine (DE); Oxidation (M); ethanolamine (DE); acetyl-d3 (K); acetyl-d3 (K); more	P51572	1566.82	12
117	AAVD(+43.04)GPM(+15.99)D(+43.04)K(+45.03)K(+45.03)E(+43.04)E(+43.04)(+43.04)	L	Q	AAVDGPMDKKEE	-	ethanolamine (DE); Oxidation (M); ethanolamine (DE); acetyl-d3 (K); acetyl-d3 (K); more	P51572	1609.86	12
118	AAVD(+43.04)GPM(+15.99)D(+43.04)K(+45.03)K(+45.03)EE(+43.04)(+43.04)	L	Q	AAVDGPMDKKEE	-	ethanolamine (DE); Oxidation (M); ethanolamine (DE); acetyl-d3 (K); acetyl-d3 (K); more	P51572	1566.82	12
119	AAVD(+43.04)GPMD(+43.04)K(+45.03)K(+45.03)E(+43.04)E(+43.04)	L	Q	AAVDGPMDKKEE	-	ethanolamine (DE); ethanolamine (DE); acetyl-d3 (K); acetyl-d3 (K); ethanolamine (DE); more	P51572	1550.82	12
120	AAVD(+43.04)GPMD(+43.04)K(+45.03)K(+45.03)E(+43.04)E(+43.04)(+43.04)	L	Q	AAVDGPMDKKEE	-	ethanolamine (DE); ethanolamine (DE); acetyl-d3 (K); acetyl-d3 (K); ethanolamine (DE); more	P51572	1593.87	12
121	AAVD(+43.04)GPMD(+43.04)K(+45.03)K(+45.03)EE(+43.04)(+43.04)	L	Q	AAVDGPMDKKEE	-	ethanolamine (DE); ethanolamine (DE); acetyl-d3 (K); acetyl-d3 (K); ethanolamine (C-term); more	P51572	1550.82	12
122	AAVK(+45.03)E(+43.04)FLE(+43.04)K(+45.03)LLPPV(+43.04)	E	M	AAVKEFLEKLLPPV	-	acetyl-d3 (K); ethanolamine (DE); ethanolamine (DE); acetyl-d3 (K); ethanolamine (C-term)	O95372	1772.11	14
123	AAVSSSK(+45.03)ASNSK(+45.03)QD(+43.04)YH	L	L	AAVSSSKASNSKQDYH	-	acetyl-d3 (K); acetyl-d3 (K); ethanolamine (DE)	P28290	1811.89	16
124	AAVSSSK(+45.03)ASNSK(+45.03)QD(+43.04)YH(+43.04)	L	L	AAVSSSKASNSKQDYH	-	acetyl-d3 (K); acetyl-d3 (K); ethanolamine (DE); ethanolamine (C-term)	P28290	1854.93	16
125	AAVSSSK(+45.03)ASNSK(+45.03)QDYH(+43.04)	L	L	AAVSSSKASNSKQDYH	-	acetyl-d3 (K); acetyl-d3 (K); ethanolamine (C-term)	P28290	1811.89	16
126	AAYLYE(+43.04)VSQLK(+45.03)D(+43.04)	M	L	AAYLYEVSQLKD	-	ethanolamine (DE); acetyl-d3 (K); ethanolamine (DE)	Q96KP4	1529.82	12
127	AAYLYE(+43.04)VSQLK(+45.03)D(+43.04)(+43.04)	M	L	AAYLYEVSQLKD	-	ethanolamine (DE); acetyl-d3 (K); ethanolamine (C-term); ethanolamine (DE)	Q96KP4	1572.86	12
128	AAYYAQTSPQGM(+15.99)PQHPPAPQGQ	Q	Q	AAYYAQTSPQGMPQHPPAPQGQ	-	Oxidation (M)	Q96AE4	2340.06	22
129	AAYYAQTSPQGM(+15.99)PQHPPAPQGQ(+43.04)	Q	Q	AAYYAQTSPQGMPQHPPAPQGQ	-	Oxidation (M); ethanolamine (C-term)	Q96AE4	2383.1	22
130	AAYYAQTSPQGMPQHPPAPQGQ(+43.04)	Q	Q	AAYYAQTSPQGMPQHPPAPQGQ	-	ethanolamine (C-term)	Q96AE4	2367.11	22
131	AAYYGQTPGPGGPQPPPTQQGQQQAQ(+43.04)	Q	Q	AAYYGQTPGPGGPQPPPTQQGQQQAQ	-	ethanolamine (C-term)	Q92945	2694.28	26
132	AC(+57.02)AAGGQGHAM(+15.99)IVE(+43.04)AYPK(+45.03)(+43.04)	V	A	ACAAGGQGHAMIVEAYPK	-	Carbamidomethylation; Oxidation (M); ethanolamine (DE); acetyl-d3 (K); ethanolamine (C-term)	P55084	1976.96	18
133	AC(+57.02)AAPSQE(+43.04)AQPE(+43.04)C(+57.02)SPE(+43.04)APPAE(+43.04)AAE(+43.04)(+43.04)	S	S	ACAAPSQEAQPECSPEAPPAEAAE	-	Carbamidomethylation; ethanolamine (DE); ethanolamine (DE); Carbamidomethylation; ethanolamine (DE); more	P29966	2725.28	24
134	AC(+57.02)GVIGIAQ(+43.04)	R	L	ACGVIGIAQ	-	Carbamidomethylation; ethanolamine (C-term)	P00441	930.496	9
135	AC(+57.02)QGK(+45.03)YTPSGQAGAAASE(+43.04)SLFVSNHAY(+43.04)	S	L	ACQGKYTPSGQAGAAASESLFVSNHAY	-	Carbamidomethylation; acetyl-d3 (K); ethanolamine (DE); ethanolamine (C-term)	P04075	2902.37	27
136	AC(+57.02)TNPAVHE(+43.04)K(+45.03)LK(+45.03)K(+45.03)(+43.04)	A	N	ACTNPAVHEKLKK	-	Carbamidomethylation; ethanolamine (DE); acetyl-d3 (K); acetyl-d3 (K); acetyl-d3 (K); more	Q9NZJ6	1715.97	13
137	AD(+43.04)GD(+43.04)FK(+45.03)IK(+45.03)C(+57.02)VAFD(+43.04)(+43.04)	M	A	ADGDFKIKCVAFD	-	ethanolamine (DE); ethanolamine (DE); acetyl-d3 (K); acetyl-d3 (K); Carbamidomethylation; more	P09382	1746.92	13
138	AD(+43.04)INATK(+45.03)VK(+45.03)THSSK(+45.03)(+43.04)	T	K	ADINATKVKTHSSK	-	ethanolamine (DE); acetyl-d3 (K); acetyl-d3 (K); acetyl-d3 (K); ethanolamine (C-term)	Q86X02	1719.98	14
139	AD(+43.04)K(+45.03)LAE(+43.04)E(+43.04)HSS(+43.04)	A	K	ADKLAEEHSS	-	ethanolamine (DE); acetyl-d3 (K); ethanolamine (DE); ethanolamine (DE); ethanolamine (C-term)	P06576	1302.7	10
140	AD(+43.04)QQD(+43.04)K(+45.03)YM(+15.99)K(+45.03)(+43.04)	I	L	ADQQDKYMK	-	ethanolamine (DE); ethanolamine (DE); acetyl-d3 (K); Oxidation (M); acetyl-d3 (K); more	Q9Y265	1360.69	9
141	AD(+43.04)TLWD(+43.04)IQK(+45.03)D(+43.04)LK(+45.03)D(+43.04)L	K	S	ADTLWDIQKDLKDL	-	ethanolamine (DE); ethanolamine (DE); acetyl-d3 (K); ethanolamine (DE); acetyl-d3 (K); more	P07195	1935.09	14
142	AD(+43.04)TLWD(+43.04)IQK(+45.03)D(+43.04)LK(+45.03)D(+43.04)L(+43.04)	K	S	ADTLWDIQKDLKDL	-	ethanolamine (DE); ethanolamine (DE); acetyl-d3 (K); ethanolamine (DE); acetyl-d3 (K); more	P07195	1978.14	14
143	AD(+43.04)TLWGIQK(+45.03)E(+43.04)LQF(+43.04)	K	S	ADTLWGIQKELQF	-	ethanolamine (DE); acetyl-d3 (K); ethanolamine (DE); ethanolamine (C-term)	P00338	1721.95	13
144	AD(+43.04)VK(+45.03)APLE(+43.04)VAQE(+43.04)H(+43.04)	C	A	ADVKAPLEVAQEH	-	ethanolamine (DE); acetyl-d3 (K); ethanolamine (DE); ethanolamine (DE); ethanolamine (C-term)	O94903	1622.92	13
145	AD(+43.04)YGGYD(+43.04)GGYVQD(+43.04)YE(+43.04)D(+43.04)FM(+15.99)(+43.04)	D	L	ADYGGYDGGYVQDYEDFM	-	ethanolamine (DE); ethanolamine (DE); ethanolamine (DE); ethanolamine (DE); ethanolamine (DE); more	O75822	2338.02	18
146	AE(+43.04)AE(+43.04)K(+45.03)IK(+45.03)AALE(+43.04)AVGGTVVLE(+43.04)(+43.04)	A	K	AEAEKIKAALEAVGGTVVLE	-	ethanolamine (DE); ethanolamine (DE); acetyl-d3 (K); acetyl-d3 (K); ethanolamine (DE); more	P52815	2302.37	20
147	AE(+43.04)E(+43.04)AQK(+45.03)TE(+43.04)SVD(+43.04)NE(+43.04)GE(+43.04)(+43.04)	T	K	AEEAQKTESVDNEGE	-	ethanolamine (DE); ethanolamine (DE); acetyl-d3 (K); ethanolamine (DE); ethanolamine (DE); more	Q15651	1981.02	15
148	AE(+43.04)E(+43.04)M(+15.99)E(+43.04)AK(+45.03)AE(+43.04)D(+43.04)(+43.04)	D	D	AEEMEAKAED	-	ethanolamine (DE); ethanolamine (DE); Oxidation (M); ethanolamine (DE); acetyl-d3 (K); more	P05198	1440.73	10
149	AE(+43.04)FLK(+45.03)VK(+45.03)GE(+43.04)K(+45.03)SGLM(+15.99)ST(+43.04)	S	M	AEFLKVKGEKSGLMST	-	ethanolamine (DE); acetyl-d3 (K); acetyl-d3 (K); ethanolamine (DE); acetyl-d3 (K); more	Q8WWY3	2004.13	16
150	AE(+43.04)FLK(+45.03)VK(+45.03)GE(+43.04)K(+45.03)SGLMST(+43.04)	S	M	AEFLKVKGEKSGLMST	-	ethanolamine (DE); acetyl-d3 (K); acetyl-d3 (K); ethanolamine (DE); acetyl-d3 (K); more	Q8WWY3	1988.13	16
151	AE(+43.04)GLFYSE(+43.04)VHPHY(+43.04)	I	S	AEGLFYSEVHPHY	-	ethanolamine (DE); ethanolamine (DE); ethanolamine (C-term)	Q9BRR6	1676.83	13
152	AE(+43.04)GPSD(+43.04)IPD(+43.04)(+43.04)	D	A	AEGPSDIPD	-	ethanolamine (DE); ethanolamine (DE); ethanolamine (C-term); ethanolamine (DE)	P42771	1071.56	9
153	AE(+43.04)K(+45.03)IK(+45.03)AALE(+43.04)AVGGTVVLE(+43.04)(+43.04)	A	E	AEKIKAALEAVGGTVVLE	-	ethanolamine (DE); acetyl-d3 (K); acetyl-d3 (K); ethanolamine (DE); ethanolamine (C-term); more	P52815	2059.25	18
154	AE(+43.04)K(+45.03)LGGSAVISLE(+43.04)GK(+45.03)PL	T	L	AEKLGGSAVISLEGKPL	-	ethanolamine (DE); acetyl-d3 (K); ethanolamine (DE); acetyl-d3 (K)	P23528	1844.09	17
155	AE(+43.04)K(+45.03)LGGSAVISLE(+43.04)GK(+45.03)PL(+43.04)	T	L	AEKLGGSAVISLEGKPL	-	ethanolamine (DE); acetyl-d3 (K); ethanolamine (DE); acetyl-d3 (K); ethanolamine (C-term)	P23528	1887.13	17
156	AE(+43.04)K(+45.03)LGGSAVISLEGK(+45.03)PL(+43.04)	T	L	AEKLGGSAVISLEGKPL	-	ethanolamine (DE); acetyl-d3 (K); acetyl-d3 (K); ethanolamine (C-term)	P23528	1844.09	17
157	AE(+43.04)K(+45.03)LK(+45.03)QSLPPGLAVK(+45.03)E(+43.04)LK(+45.03)(+43.04)	E	K	AEKLKQSLPPGLAVKELK	-	ethanolamine (DE); acetyl-d3 (K); acetyl-d3 (K); acetyl-d3 (K); ethanolamine (DE); more	P63173	2257.42	18
158	AE(+43.04)K(+45.03)NVE(+43.04)K(+45.03)K(+45.03)ID(+43.04)K(+45.03)YTE(+43.04)VLK(+45.03)THGLLV(+43.04)	K	Q	AEKNVEKKIDKYTEVLKTHGLLV	-	ethanolamine (DE); acetyl-d3 (K); ethanolamine (DE); acetyl-d3 (K); acetyl-d3 (K); more	P40429	3094.86	23
159	AE(+43.04)K(+45.03)TSGSNVK(+45.03)IVK(+45.03)VK(+45.03)K(+45.03)E(+43.04)(+43.04)	A	N	AEKTSGSNVKIVKVKKE	-	ethanolamine (DE); acetyl-d3 (K); acetyl-d3 (K); acetyl-d3 (K); acetyl-d3 (K); more	P56381	2198.35	17
160	AE(+43.04)LSQPLTAGGAISE(+43.04)LL(+43.04)	V	Q	AELSQPLTAGGAISELL	-	ethanolamine (DE); ethanolamine (DE); ethanolamine (C-term)	Q15291	1798.02	17
161	AE(+43.04)NATSGE(+43.04)TLE(+43.04)E(+43.04)NE(+43.04)AGD(+43.04)(+43.04)	K	T	AENATSGETLEENEAGD	-	ethanolamine (DE); ethanolamine (DE); ethanolamine (DE); ethanolamine (DE); ethanolamine (DE); more	Q9UQ80	2037	17
162	AE(+43.04)NK(+45.03)E(+43.04)K(+45.03)E(+43.04)TAK(+45.03)S(+43.04)	E	D	AENKEKETAKS	-	ethanolamine (DE); acetyl-d3 (K); ethanolamine (DE); acetyl-d3 (K); ethanolamine (DE); more	P45973	1540.88	11
163	AE(+43.04)PRPPPTQE(+43.04)AA(+43.04)	L	D	AEPRPPPTQEAA	-	ethanolamine (DE); ethanolamine (DE); ethanolamine (C-term)	Q9Y285	1391.75	12
164	AE(+43.04)QD(+43.04)VE(+43.04)K(+45.03)K(+45.03)K(+45.03)	E	A	AEQDVEKKK	-	ethanolamine (DE); ethanolamine (DE); ethanolamine (DE); acetyl-d3 (K); acetyl-d3 (K); more	P26373	1337.79	9
165	AE(+43.04)QD(+43.04)VE(+43.04)K(+45.03)K(+45.03)K(+45.03)(+43.04)	E	A	AEQDVEKKK	-	ethanolamine (DE); ethanolamine (DE); ethanolamine (DE); acetyl-d3 (K); acetyl-d3 (K); more	P26373	1380.83	9
166	AE(+43.04)QD(+43.04)VEK(+45.03)K(+45.03)K(+45.03)(+43.04)	E	A	AEQDVEKKK	-	ethanolamine (DE); ethanolamine (DE); acetyl-d3 (K); acetyl-d3 (K); acetyl-d3 (K); more	P26373	1337.79	9
167	AE(+43.04)SHTFK(+45.03)(+43.04)	G	G	AESHTFK	-	ethanolamine (DE); acetyl-d3 (K); ethanolamine (C-term)	P50238	949.506	7
168	AE(+43.04)TVD(+43.04)PASLWE(+43.04)Y(+43.04)	A	S	AETVDPASLWEY	-	ethanolamine (DE); ethanolamine (DE); ethanolamine (DE); ethanolamine (C-term)	Q16658	1551.79	12
169	AE(+43.04)TVD(+43.04)PASLWEY(+43.04)	A	S	AETVDPASLWEY	-	ethanolamine (DE); ethanolamine (DE); ethanolamine (C-term)	Q16658	1508.75	12
170	AE(+43.04)VE(+43.04)PVGE(+43.04)K(+45.03)E(+43.04)GFIVSE(+43.04)QC(+57.02)(+43.04)	A	Y	AEVEPVGEKEGFIVSEQC	-	ethanolamine (DE); ethanolamine (DE); ethanolamine (DE); acetyl-d3 (K); ethanolamine (DE); more	Q6UX71	2309.21	18
171	AE(+43.04)VQAK(+45.03)QQA(+43.04)	K	E	AEVQAKQQA	-	ethanolamine (DE); acetyl-d3 (K); ethanolamine (C-term)	O75368	1102.62	9
172	AE(+43.04)WD(+43.04)D(+43.04)YVPK(+45.03)LYE(+43.04)QLSGK(+45.03)(+43.04)	Y	Q	AEWDDYVPKLYEQLSGK	-	ethanolamine (DE); ethanolamine (DE); ethanolamine (DE); acetyl-d3 (K); ethanolamine (DE); more	P30086	2345.25	17
173	AEK(+45.03)LGGSAVISLE(+43.04)GK(+45.03)PL(+43.04)	T	L	AEKLGGSAVISLEGKPL	-	acetyl-d3 (K); ethanolamine (DE); acetyl-d3 (K); ethanolamine (C-term)	P23528	1844.09	17
174	AFAFK(+45.03)QE(+43.04)(+43.04)	L	S	AFAFKQE	-	acetyl-d3 (K); ethanolamine (C-term); ethanolamine (DE)	O75717	970.532	7
175	AFANFANFSK(+45.03)(+43.04)	Q	D	AFANFANFSK	-	acetyl-d3 (K); ethanolamine (C-term)	Q14677	1203.61	10
176	AFC(+57.02)K(+45.03)AIVK(+45.03)SGGK(+45.03)ISLK(+45.03)HPGK(+45.03)C(+57.02)(+43.04)	K	C	AFCKAIVKSGGKISLKHPGKC	-	Carbamidomethylation; acetyl-d3 (K); acetyl-d3 (K); acetyl-d3 (K); acetyl-d3 (K); more	Q6UWN8	2553.44	21
177	AFE(+43.04)FLSSA(+43.04)	E	S	AFEFLSSA	-	ethanolamine (DE); ethanolamine (C-term)	P40925	956.497	8
178	AFLGLTAPPGSK(+45.03)E(+43.04)AE(+43.04)VQAK(+45.03)QQA(+43.04)	V	Y	AFLGLTAPPGSKEAEVQAKQQA	-	acetyl-d3 (K); ethanolamine (DE); ethanolamine (DE); acetyl-d3 (K); ethanolamine (C-term)	O75368	2459.37	22
179	AFM(+15.99)GPLK(+45.03)K(+45.03)D(+43.04)RIAK(+45.03)E(+43.04)E(+43.04)GA(+43.04)	K	K	AFMGPLKKDRIAKEEGA	-	Oxidation (M); acetyl-d3 (K); acetyl-d3 (K); ethanolamine (DE); acetyl-d3 (K); more	P39023	2183.24	17
180	AFMGPLK(+45.03)K(+45.03)D(+43.04)RIAK(+45.03)E(+43.04)E(+43.04)GA(+43.04)	K	K	AFMGPLKKDRIAKEEGA	-	acetyl-d3 (K); acetyl-d3 (K); ethanolamine (DE); acetyl-d3 (K); ethanolamine (DE); more	P39023	2167.25	17
181	AFNQGK(+45.03)IFK(+45.03)	G	K	AFNQGKIFK	-	acetyl-d3 (K); acetyl-d3 (K)	P26641	1141.64	9
182	AFNQGK(+45.03)IFK(+45.03)(+43.04)	G	K	AFNQGKIFK	-	acetyl-d3 (K); acetyl-d3 (K); ethanolamine (C-term)	P26641	1184.68	9
183	AFPQM(+15.99)ITPLVTK(+45.03)G(+43.04)	Y	Y	AFPQMITPLVTKG	-	Oxidation (M); acetyl-d3 (K); ethanolamine (C-term)	Q14353	1505.84	13
184	AFPQMITPLVTK(+45.03)G(+43.04)	Y	Y	AFPQMITPLVTKG	-	acetyl-d3 (K); ethanolamine (C-term)	Q14353	1489.84	13
185	AFQNVLTHVC(+57.02)LD(+43.04)(+43.04)	D	A	AFQNVLTHVCLD	-	Carbamidomethylation; ethanolamine (C-term); ethanolamine (DE)	Q8NBU5	1501.77	12
186	AFTPFSGPK(+45.03)(+43.04)	D	K	AFTPFSGPK	-	acetyl-d3 (K); ethanolamine (C-term)	P12955	1038.56	9
187	AFWLPTID(+43.04)D(+43.04)(+43.04)	N	M	AFWLPTIDD	-	ethanolamine (DE); ethanolamine (C-term); ethanolamine (DE)	Q6UXN9	1205.64	9
188	AGAAASE(+43.04)SLFVSNHAY(+43.04)	G	Q	AGAAASESLFVSNHAY	-	ethanolamine (DE); ethanolamine (C-term)	P04075	1679.83	16
189	AGAAPRPPPK(+45.03)PM(+15.99)(+43.04)	R，R	P，P	AGAAPRPPPKPM	-，-	acetyl-d3 (K); Oxidation (M); ethanolamine (C-term)	P62854，Q5JNZ5	1292.71	12
190	AGAAPRPPPK(+45.03)PM(+43.04)	R，R	P，P	AGAAPRPPPKPM	-，-	acetyl-d3 (K); ethanolamine (C-term)	P62854，Q5JNZ5	1276.72	12
191	AGAGK(+45.03)VTK(+45.03)SAQK(+45.03)AQK(+45.03)AK(+45.03)	K，K	A，A	AGAGKVTKSAQKAQKAK	-，-	acetyl-d3 (K); acetyl-d3 (K); acetyl-d3 (K); acetyl-d3 (K); acetyl-d3 (K)	Q5VTE0，P68104	1896.13	17
192	AGAGK(+45.03)VTK(+45.03)SAQK(+45.03)AQK(+45.03)AK(+45.03)(+43.04)	K，K	A，A	AGAGKVTKSAQKAQKAK	-，-	acetyl-d3 (K); acetyl-d3 (K); acetyl-d3 (K); acetyl-d3 (K); acetyl-d3 (K); more	Q5VTE0，P68104	1939.17	17
193	AGC(+57.02)D(+43.04)PAGVHPPR(+43.04)	V	T	AGCDPAGVHPPR	-	Carbamidomethylation; ethanolamine (DE); ethanolamine (C-term)	Q08J23	1318.66	12
194	AGE(+43.04)APTE(+43.04)NPAPPTQQSSAE(+43.04)(+43.04)	A	K	AGEAPTENPAPPTQQSSAE	-	ethanolamine (DE); ethanolamine (DE); ethanolamine (C-term); ethanolamine (DE)	P16989	2053.01	19
195	AGE(+43.04)E(+43.04)GGE(+43.04)APQE(+43.04)PQS(+43.04)	D	N	AGEEGGEAPQEPQS	-	ethanolamine (DE); ethanolamine (DE); ethanolamine (DE); ethanolamine (DE); ethanolamine (C-term)	P31947	1599.79	14
196	AGGFLGPPPPSGK(+45.03)FS(+43.04)	K	Q	AGGFLGPPPPSGKFS	-	acetyl-d3 (K); ethanolamine (C-term)	Q9UM00	1502.8	15
197	AGK(+45.03)GLLGC(+57.02)NIIPLQR(+43.04)	R	W	AGKGLLGCNIIPLQR	-	acetyl-d3 (K); Carbamidomethylation; ethanolamine (C-term)	O00233	1696.98	15
198	AGK(+45.03)GPLATGGIK(+45.03)K(+45.03)SGK(+45.03)K(+45.03)	K	A	AGKGPLATGGIKKSGKK	-	acetyl-d3 (K); acetyl-d3 (K); acetyl-d3 (K); acetyl-d3 (K); acetyl-d3 (K)	Q9Y2S6	1822.11	17
199	AGK(+45.03)GPLATGGIK(+45.03)K(+45.03)SGK(+45.03)K(+45.03)(+43.04)	K	A	AGKGPLATGGIKKSGKK	-	acetyl-d3 (K); acetyl-d3 (K); acetyl-d3 (K); acetyl-d3 (K); acetyl-d3 (K); more	Q9Y2S6	1865.16	17
200	AGK(+45.03)K(+45.03)PK(+45.03)E(+43.04)(+43.04)	V	G	AGKKPKE	-	acetyl-d3 (K); acetyl-d3 (K); acetyl-d3 (K); ethanolamine (C-term); ethanolamine (DE)	P62847	977.622	7
201	AGK(+45.03)VTK(+45.03)SAQK(+45.03)AQK(+45.03)AK(+45.03)	A，A	G，G	AGKVTKSAQKAQKAK	-，-	acetyl-d3 (K); acetyl-d3 (K); acetyl-d3 (K); acetyl-d3 (K); acetyl-d3 (K)	Q5VTE0，P68104	1768.07	15
202	AGK(+45.03)VTK(+45.03)SAQK(+45.03)AQK(+45.03)AK(+45.03)(+43.04)	A，A	G，G	AGKVTKSAQKAQKAK	-，-	acetyl-d3 (K); acetyl-d3 (K); acetyl-d3 (K); acetyl-d3 (K); acetyl-d3 (K); more	Q5VTE0，P68104	1811.11	15
203	AGLK(+45.03)SHPPPPE(+43.04)K(+45.03)(+43.04)	A	S	AGLKSHPPPPEK	-	acetyl-d3 (K); ethanolamine (DE); acetyl-d3 (K); ethanolamine (C-term)	A0A0U1RRE5	1432.83	12
204	AGLK(+45.03)SHPPPPEK(+45.03)(+43.04)	A	S	AGLKSHPPPPEK	-	acetyl-d3 (K); acetyl-d3 (K); ethanolamine (C-term)	A0A0U1RRE5	1389.79	12
205	AGM(+15.99)TGYGM(+15.99)PRQIL(+43.04)	S	Q	AGMTGYGMPRQIL	-	Oxidation (M); Oxidation (M); ethanolamine (C-term)	P37802	1468.72	13
206	AGNK(+45.03)PD(+43.04)HM(+15.99)IK(+45.03)PVE(+43.04)VTE(+43.04)SA(+43.04)	Y	A	AGNKPDHMIKPVEVTESA	-	acetyl-d3 (K); ethanolamine (DE); Oxidation (M); acetyl-d3 (K); ethanolamine (DE); more	O15294	2200.18	18
207	AGPPNYPFSD(+43.04)E(+43.04)Y(+43.04)	I，I	F，F	AGPPNYPFSDEY	-，-	ethanolamine (DE); ethanolamine (DE); ethanolamine (C-term)	P52895，Q04828	1484.69	12
208	AGSQSQVE(+43.04)TE(+43.04)A(+43.04)	N	T	AGSQSQVETEA	-	ethanolamine (DE); ethanolamine (DE); ethanolamine (C-term)	Q02790	1234.62	11
209	AGTK(+45.03)K(+45.03)QFQK(+45.03)F(+43.04)	K	A	AGTKKQFQKF	-	acetyl-d3 (K); acetyl-d3 (K); acetyl-d3 (K); ethanolamine (C-term)	P62280	1359.79	10
210	AGVK(+45.03)LSSQQA(+43.04)	S	L	AGVKLSSQQA	-	acetyl-d3 (K); ethanolamine (C-term)	Q9H2P0	1075.61	10
211	AGVLK(+45.03)D(+43.04)YSD(+43.04)ITSSK(+45.03)(+43.04)	H	L	AGVLKDYSDITSSK	-	acetyl-d3 (K); ethanolamine (DE); ethanolamine (DE); acetyl-d3 (K); ethanolamine (C-term)	P29084	1701.94	14
212	AGYSGQNSM(+15.99)GGYD(+43.04)(+43.04)	Y	G	AGYSGQNSMGGYD	-	Oxidation (M); ethanolamine (C-term); ethanolamine (DE)	P52597	1407.57	13
213	AHAIHQVTK(+45.03)(+43.04)	Y	L	AHAIHQVTK	-	acetyl-d3 (K); ethanolamine (C-term)	P00505	1091.63	9
214	AHAQTE(+43.04)VAK(+45.03)K(+45.03)YGLK(+45.03)PPTL(+43.04)	D	A	AHAQTEVAKKYGLKPPTL	-	ethanolamine (DE); acetyl-d3 (K); acetyl-d3 (K); acetyl-d3 (K); ethanolamine (C-term)	O94826	2172.26	18
215	AHD(+43.04)WVYE(+43.04)(+43.04)	S，S	C，C	AHDWVYE	-，-	ethanolamine (DE); ethanolamine (C-term); ethanolamine (DE)	O60361，P22392	1047.51	7
216	AHK(+45.03)LFNNLK(+45.03)(+43.04)	C，C	V，V	AHKLFNNLK	-，-	acetyl-d3 (K); acetyl-d3 (K); ethanolamine (C-term)	A0A096LP55，P07919	1216.72	9
217	AHSLVQAE(+43.04)APR(+43.04)	S	Q	AHSLVQAEAPR	-	ethanolamine (DE); ethanolamine (C-term)	Q9BSF4	1263.7	11
218	AHYK(+45.03)LVPQQLAH(+43.04)	C	G	AHYKLVPQQLAH	-	acetyl-d3 (K); ethanolamine (C-term)	P10606	1491.84	12
219	AIAK(+45.03)K(+45.03)GK(+45.03)FNK(+45.03)(+43.04)	L	E	AIAKKGKFNK	-	acetyl-d3 (K); acetyl-d3 (K); acetyl-d3 (K); acetyl-d3 (K); ethanolamine (C-term)	Q9NTX5	1326.84	10
220	AIALFQK(+45.03)M(+15.99)L(+43.04)	D	E	AIALFQKML	-	acetyl-d3 (K); Oxidation (M); ethanolamine (C-term)	P26640	1137.67	9
221	AID(+43.04)D(+43.04)LM(+15.99)PAQK(+45.03)(+43.04)	G	Q	AIDDLMPAQK	-	ethanolamine (DE); ethanolamine (DE); Oxidation (M); acetyl-d3 (K); ethanolamine (C-term)	P12277	1290.7	10
222	AID(+43.04)D(+43.04)LMPAQK(+45.03)(+43.04)	G	Q	AIDDLMPAQK	-	ethanolamine (DE); ethanolamine (DE); acetyl-d3 (K); ethanolamine (C-term)	P12277	1274.71	10
223	AIE(+43.04)HAD(+43.04)GGVAAGVAVLD(+43.04)NPYPV(+43.04)	T	K	AIEHADGGVAAGVAVLDNPYPV	-	ethanolamine (DE); ethanolamine (DE); ethanolamine (DE); ethanolamine (C-term)	P48637	2306.24	22
224	AIGK(+45.03)VLK(+45.03)LVPE(+43.04)K(+45.03)D(+43.04)	T，T	I，I	AIGKVLKLVPEKD	-，-	acetyl-d3 (K); acetyl-d3 (K); ethanolamine (DE); acetyl-d3 (K); ethanolamine (DE)	P15170，Q8IYD1	1630.04	13
225	AIGK(+45.03)VLK(+45.03)LVPE(+43.04)K(+45.03)D(+43.04)(+43.04)	T，T	I，I	AIGKVLKLVPEKD	-，-	acetyl-d3 (K); acetyl-d3 (K); ethanolamine (DE); acetyl-d3 (K); ethanolamine (C-term); more	P15170，Q8IYD1	1673.08	13
226	AIHD(+43.04)LGK(+45.03)AHGSLK(+45.03)P(+43.04)	N	K	AIHDLGKAHGSLKP	-	ethanolamine (DE); acetyl-d3 (K); acetyl-d3 (K); ethanolamine (C-term)	Q9BUP3	1618.94	14
227	AIHPTSSE(+43.04)E(+43.04)LVTLR(+43.04)	T	V	AIHPTSSEELVTLR	-	ethanolamine (DE); ethanolamine (DE); ethanolamine (C-term)	P00390	1680.95	14
228	AIIGTQD(+43.04)IVFGE(+43.04)VD(+43.04)R(+43.04)	V	V	AIIGTQDIVFGEVDR	-	ethanolamine (DE); ethanolamine (DE); ethanolamine (DE); ethanolamine (C-term)	O75306	1804.02	15
229	AIK(+45.03)ALLQ(+43.04)	N	Q	AIKALLQ	-	acetyl-d3 (K); ethanolamine (C-term)	P58546	843.562	7
230	AIK(+45.03)QATK(+45.03)D(+43.04)K(+45.03)K(+45.03)ITTV(+43.04)	Q	A	AIKQATKDKKITTV	-	acetyl-d3 (K); acetyl-d3 (K); ethanolamine (DE); acetyl-d3 (K); acetyl-d3 (K); more	Q96A65	1810.13	14
231	AILGPE(+43.04)NPK(+45.03)IAK(+45.03)D(+43.04)PSWIIQ(+43.04)	G	L	AILGPENPKIAKDPSWIIQ	-	ethanolamine (DE); acetyl-d3 (K); acetyl-d3 (K); ethanolamine (DE); ethanolamine (C-term)	Q5JRX3	2308.34	19
[truncated: 4,573 more rows]
